# Supplementary material for: Homology model and targeted mutagenesis identify critical residues for arachidonic acid inhibition of Kv4 channels
Source: PubMed Central journal article supplement — Channels (Austin). 2013 Jan 18;7(2):74–84. doi: 10.4161/chan.23453 (PMC3667888; doi:10.4161/chan.23453), 2013-01-18
Supplement: chan-7-74-s01.pdf [file chan-7-74-s01.pdf]

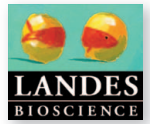

## **Supplemental Material to:**

**Robert Heler, Jessica K. Bell and Linda M. Boland**

**Homology model and targeted mutagenesis identify  
critical residues for arachidonic acid inhibition of Kv4  
channels**

**March 2013; Vol 7 (Issue 2)**

**<http://dx.doi.org/10.4161/chan.23453>**

**<http://www.landesbioscience.com/journals/channels/article/23453/>**

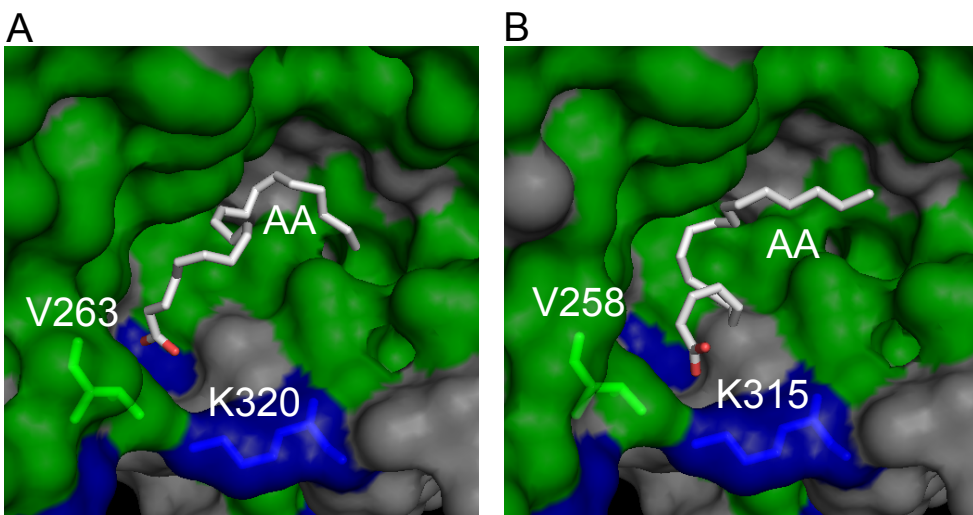

**C**

|        | S2                      | S3              | S4                                   |     |
|--------|-------------------------|-----------------|--------------------------------------|-----|
| rKv4.2 | MIFTVEYLLRLAAPSRYRFVRS  | VM              | SIIDVVAILPYYIGLVMTDNEVDVSGAFVTLRVFRV | 297 |
| rKv4.3 | MIFTVEYLLRLFAAPSRYRFIRS | VM              | SIIDVVAIMPYYIGLVMTNNEVDVSGAFVTLRVFRV | 294 |
| rKv4.1 | LIPTGEYLLRLFAAPSRCRFLRS | VM              | SLIDVVAILPYYIGLFPVKNDVDVSGAFVTLRVFRV | 299 |
|        | :*** ***** ***** **:*   | ***:*****:***** | :.:*****:*****                       |     |

  

|        | S4          | S4-S5      | S5          |                               |        |
|--------|-------------|------------|-------------|-------------------------------|--------|
| rKv4.2 | FRIFKFSRHSQ | GLRILGYTLK | SCASELGFLLF | SLTMAIIIFATVMFYAEKGGSSASKFTSI | 357    |
| rKv4.3 | FRIFKFSRHSQ | GLRILGYTLK | SCASELGFLLF | SLTMAIIIFATVMFYAEKGGSSASKFTSI | 354    |
| rKv4.1 | FRIFKFSRHSQ | GLRILGYTLK | SCASELGFLLF | SLTMAIIIFATVMFYAEKGTSKTNFTSI  | 359    |
|        | *****       | *****      | *****       | *****:*                       | :;**** |

  

|        | P                                | S6    |                              |     |
|--------|----------------------------------|-------|------------------------------|-----|
| rKv4.2 | PAAFWYTIVTMTTLGYGDMVPKTIAGKIFGSI | C     | LSGLVVLVIALPVPVIVSNFSRIYHQNQ | 417 |
| rKv4.3 | PASFWYTIVTMTTLGYGDMVPKTIAGKIFGSI | C     | LSGLVVLVIALPVPVIVSNFSRIYHQNQ | 414 |
| rKv4.1 | PAAFWYTIVTMTTLGYGDMVPSTIAGKIFGSI | C     | LSGLVVLVIALPVPVIVSNFSRIYHQNQ | 419 |
|        | **:                              | ***** | *****                        |     |

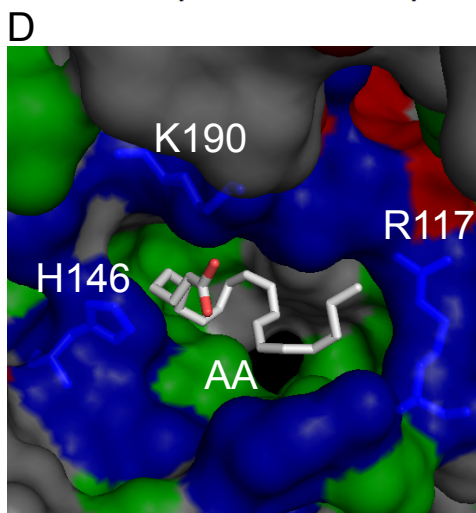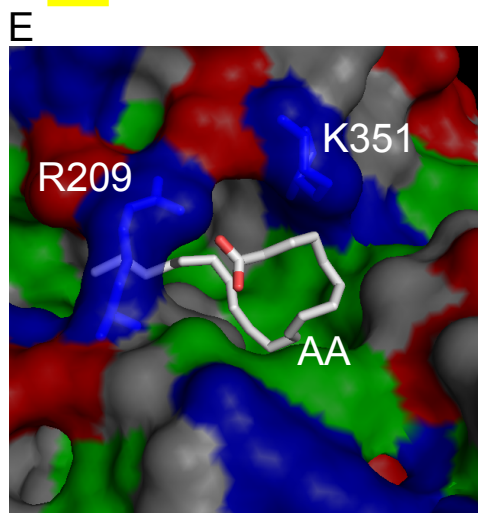

**Supplemental Figure 1.** Conserved features of AA binding pockets in proteins. AA was docked to the region near the proposed binding pocket within (A) rKv4.1 and (B) rKv4.3. Only one of eight orientations of AA is shown in each binding pocket, for clarity. (C) ClustalW2 sequence alignment of all 3 Kv4 channel subtypes, highlighting the conserved features of the proposed AA binding pocket. The Genbank accession numbers are NM\_001105748.1 (rKv4.1), NP\_113918.2 (rKv4.2), and BAA24525.1 (rKv4.3). Numbers refer to the last residue on each line. Topographical regions are noted (e.g. S3 = third transmembrane domain). Residues highlighted in yellow are those involved in the hydrophobic pocket shown in Figure 1D. (D, E) AA was docked to the crystal structure of human serum albumin (pdb file 1GNJ), using the same methods as described for AA docking to the Kv4.2 homology model. AA docking in (D) recapitulates "site 1" and the docking in (E) recapitulates "site 6" in the crystal structure of albumin with AA bound.

**Supplemental File 1.** A pdb file for our Kv4.2 tetrameric model. The residue numbering begins with 175 because the first 174 amino acids represent the cytoplasmic N-terminus for which we lacked structural data for modeling.

REMARK Created by MOLEMAN2 V. 070913/3.3.9 at Mon Sep 5 16:43:35 2011 for jbell6

REMARK 1 THEORETICAL MODEL, MODELLER 9v5 2009/01/16 10:18:45

REMARK 6 MODELLER OBJECTIVE FUNCTION: 4028.9565

REMARK 6 MODELLER BEST TEMPLATE % SEQ ID: 52.201

REMARK 40

REMARK 40 MOLPROBITY STRUCTURE VALIDATION

REMARK 40 PROGRAMS : MOLPROBITY (KING, REDUCE, AND PROBE)

REMARK 40 AUTHORS : I.W.DAVIS,V.B.CHEN,

REMARK 40 : R.M.IMMORMINO,J.J.HEADD,W.B.ARENDALL,J.M.WORD

REMARK 40 URL : HTTP://KINEMAGE.BIOCHEM.DUKE.EDU/MOLPROBITY/

REMARK 40 AUTHORS : I.W.DAVIS,A.LEAVER-FAY,V.B.CHEN,J.N.BLOCK,

REMARK 40 : G.J.KAPRAL,X.WANG,L.W.MURRAY,W.B.ARENDALL,

REMARK 40 : J.SNOEYINK,J.S.RICHARDSON,D.C.RICHARDSON

REMARK 40 REFERENCE : MOLPROBITY: ALL-ATOM CONTACTS AND STRUCTURE

REMARK 40 : VALIDATION FOR PROTEINS AND NUCLEIC ACIDS

REMARK 40 : NUCLEIC ACIDS RESEARCH. 2007;35:W375-83.

REMARK 40 MOLPROBITY OUTPUT SCORES:

REMARK 40 ALL-ATOM CLASHSCORE : 22.42

REMARK 40 BAD ROTAMERS : 0.5% 4/832 (TARGET 0-1%)

REMARK 40 RAMACHANDRAN OUTLIERS : 1.7% 16/964 (TARGET 0.2%)

REMARK 40 RAMACHANDRAN FAVORED : 94.6% 912/964 (TARGET 98.0%)

CRYST1 1.000 1.000 1.000 90.00 90.00 90.00 P 1 1

ORIGX1 1.000000 0.000000 0.000000 0.000000 0.000000

ORIGX2 0.000000 1.000000 0.000000 0.000000 0.000000

ORIGX3 0.000000 0.000000 1.000000 0.000000 0.000000

SCALE1 1.000000 0.000000 0.000000 0.000000 0.000000

SCALE2 0.000000 1.000000 0.000000 0.000000 0.000000

SCALE3 0.000000 0.000000 1.000000 0.000000 0.000000

ATOM 1 N PHE A 175 79.302 90.340 -69.218 1.00 80.84 A N

ATOM 2 CA PHE A 175 79.453 91.323 -70.284 1.00 80.84 A C

ATOM 3 CB PHE A 175 78.087 91.868 -70.706 1.00 80.84 A C

ATOM 4 CG PHE A 175 77.139 90.812 -71.196 1.00 80.84 A C

ATOM 5 CD1 PHE A 175 77.136 90.429 -72.527 1.00 80.84 A C

ATOM 6 CD2 PHE A 175 76.251 90.202 -70.326 1.00 80.84 A C

ATOM 7 CE1 PHE A 175 76.265 89.457 -72.981 1.00 80.84 A C

ATOM 8 CE2 PHE A 175 75.377 89.229 -70.774 1.00 80.84 A C

ATOM 9 CZ PHE A 175 75.385 88.856 -72.103 1.00 80.84 A C

ATOM 10 C PHE A 175 80.364 92.467 -69.854 1.00 80.84 A C

ATOM 11 O PHE A 175 80.836 93.243 -70.685 1.00 80.84 A O

ATOM 12 N GLU A 176 80.606 92.566 -68.551 1.00133.93 A N

ATOM 13 CA GLU A 176 81.460 93.615 -68.008 1.00133.93 A C

ATOM 14 CB GLU A 176 80.669 94.506 -67.048 1.00133.93 A C

ATOM 15 CG GLU A 176 79.480 95.206 -67.687 1.00133.93 A C

ATOM 16 CD GLU A 176 78.728 96.089 -66.709 1.00133.93 A C

ATOM 17 OE1 GLU A 176 79.133 96.150 -65.529 1.00133.93 A O

ATOM 18 OE2 GLU A 176 77.733 96.722 -67.120 1.00133.93 A O

ATOM 19 C GLU A 176 82.671 93.022 -67.296 1.00133.93 A C

ATOM 20 O GLU A 176 83.687 93.693 -67.113 1.00133.93 A O

ATOM 21 N ASN A 177 82.556 91.759 -66.897 1.00 62.69 A N

ATOM 22 CA ASN A 177 83.638 91.074 -66.200 1.00 62.69 A C

ATOM 23 CB ASN A 177 83.307 90.925 -64.714 1.00 62.69 A C

ATOM 24 CG ASN A 177 83.082 92.259 -64.030 1.00 62.69 A C

ATOM 25 OD1 ASN A 177 84.016 92.866 -63.505 1.00 62.69 A O

ATOM 26 ND2 ASN A 177 81.838 92.724 -64.035 1.00 62.69 A N

ATOM 27 C ASN A 177 83.944 89.709 -66.809 1.00 62.69 A C

ATOM 28 O ASN A 177 83.432 88.689 -66.347 1.00 62.69 A O

ATOM 29 N PRO A 178 84.782 89.689 -67.856 1.00 73.65 A N

ATOM 30 CA PRO A 178 85.179 88.455 -68.543 1.00 73.65 A C

ATOM 31 CD PRO A 178 85.361 90.884 -68.491 1.00 73.65 A C

ATOM 32 CB PRO A 178 86.139 88.954 -69.628 1.00 73.65 A C

ATOM 33 CG PRO A 178 85.768 90.381 -69.840 1.00 73.65 A C

ATOM 34 C PRO A 178 85.905 87.487 -67.614 1.00 73.65 A C

ATOM 35 O PRO A 178 86.052 86.310 -67.945 1.00 73.65 A O

ATOM 36 N HIS A 179 86.354 87.982 -66.465 1.00 64.97 A N

ATOM 37 CA HIS A 179 87.083 87.157 -65.509 1.00 64.97 A C

ATOM 38 ND1 HIS A 179 88.813 89.591 -66.534 1.00 64.97 A N

ATOM 39 CG HIS A 179 89.119 88.670 -65.555 1.00 64.97 A C

ATOM 40 CB HIS A 179 88.074 88.009 -64.712 1.00 64.97 A C

|      |     |     |     |   |     |        |        |         |      |        |   |   |
|------|-----|-----|-----|---|-----|--------|--------|---------|------|--------|---|---|
| ATOM | 41  | NE2 | HIS | A | 179 | 90.946 | 89.384 | -66.542 | 1.00 | 64.97  | A | N |
| ATOM | 42  | CD2 | HIS | A | 179 | 90.467 | 88.544 | -65.566 | 1.00 | 64.97  | A | C |
| ATOM | 43  | CE1 | HIS | A | 179 | 89.927 | 90.004 | -67.111 | 1.00 | 64.97  | A | C |
| ATOM | 44  | C   | HIS | A | 179 | 86.141 | 86.426 | -64.557 | 1.00 | 64.97  | A | C |
| ATOM | 45  | O   | HIS | A | 179 | 86.585 | 85.772 | -63.613 | 1.00 | 64.97  | A | O |
| ATOM | 46  | N   | THR | A | 180 | 84.841 | 86.540 | -64.809 | 1.00 | 98.23  | A | N |
| ATOM | 47  | CA  | THR | A | 180 | 83.841 | 85.885 | -63.973 | 1.00 | 98.23  | A | C |
| ATOM | 48  | CB  | THR | A | 180 | 82.420 | 86.388 | -64.287 | 1.00 | 98.23  | A | C |
| ATOM | 49  | OG1 | THR | A | 180 | 82.324 | 87.783 | -63.975 | 1.00 | 98.23  | A | O |
| ATOM | 50  | CG2 | THR | A | 180 | 81.392 | 85.620 | -63.471 | 1.00 | 98.23  | A | C |
| ATOM | 51  | C   | THR | A | 180 | 83.883 | 84.369 | -64.140 | 1.00 | 98.23  | A | C |
| ATOM | 52  | O   | THR | A | 180 | 83.989 | 83.630 | -63.161 | 1.00 | 98.23  | A | O |
| ATOM | 53  | N   | SER | A | 181 | 83.801 | 83.913 | -65.385 | 1.00 | 37.88  | A | N |
| ATOM | 54  | CA  | SER | A | 181 | 83.825 | 82.485 | -65.680 | 1.00 | 37.88  | A | C |
| ATOM | 55  | CB  | SER | A | 181 | 82.416 | 81.896 | -65.586 | 1.00 | 37.88  | A | C |
| ATOM | 56  | OG  | SER | A | 181 | 81.536 | 82.532 | -66.496 | 1.00 | 37.88  | A | O |
| ATOM | 57  | C   | SER | A | 181 | 84.414 | 82.216 | -67.060 | 1.00 | 37.88  | A | C |
| ATOM | 58  | O   | SER | A | 181 | 84.867 | 83.136 | -67.743 | 1.00 | 37.88  | A | O |
| ATOM | 59  | N   | THR | A | 182 | 84.406 | 80.950 | -67.464 | 1.00 | 92.23  | A | N |
| ATOM | 60  | CA  | THR | A | 182 | 84.931 | 80.558 | -68.767 | 1.00 | 92.23  | A | C |
| ATOM | 61  | CB  | THR | A | 182 | 85.008 | 79.026 | -68.906 | 1.00 | 92.23  | A | C |
| ATOM | 62  | OG1 | THR | A | 182 | 85.861 | 78.493 | -67.886 | 1.00 | 92.23  | A | O |
| ATOM | 63  | CG2 | THR | A | 182 | 85.558 | 78.642 | -70.272 | 1.00 | 92.23  | A | C |
| ATOM | 64  | C   | THR | A | 182 | 84.074 | 81.120 | -69.895 | 1.00 | 92.23  | A | C |
| ATOM | 65  | O   | THR | A | 182 | 84.595 | 81.648 | -70.878 | 1.00 | 92.23  | A | O |
| ATOM | 66  | N   | MET | A | 183 | 82.758 | 81.004 | -69.748 | 1.00 | 58.27  | A | N |
| ATOM | 67  | CA  | MET | A | 183 | 81.827 | 81.513 | -70.747 | 1.00 | 58.27  | A | C |
| ATOM | 68  | CB  | MET | A | 183 | 80.389 | 81.142 | -70.381 | 1.00 | 58.27  | A | C |
| ATOM | 69  | CG  | MET | A | 183 | 80.136 | 79.645 | -70.294 | 1.00 | 58.27  | A | C |
| ATOM | 70  | SD  | MET | A | 183 | 78.425 | 79.247 | -69.889 | 1.00 | 58.27  | A | S |
| ATOM | 71  | CE  | MET | A | 183 | 77.566 | 79.989 | -71.275 | 1.00 | 58.27  | A | C |
| ATOM | 72  | C   | MET | A | 183 | 81.960 | 83.025 | -70.894 | 1.00 | 58.27  | A | C |
| ATOM | 73  | O   | MET | A | 183 | 81.770 | 83.572 | -71.980 | 1.00 | 58.27  | A | O |
| ATOM | 74  | N   | ALA | A | 184 | 82.288 | 83.694 | -69.794 | 1.00 | 28.36  | A | N |
| ATOM | 75  | CA  | ALA | A | 184 | 82.480 | 85.139 | -69.805 | 1.00 | 28.36  | A | C |
| ATOM | 76  | CB  | ALA | A | 184 | 82.593 | 85.670 | -68.386 | 1.00 | 28.36  | A | C |
| ATOM | 77  | C   | ALA | A | 184 | 83.715 | 85.511 | -70.616 | 1.00 | 28.36  | A | C |
| ATOM | 78  | O   | ALA | A | 184 | 83.780 | 86.587 | -71.211 | 1.00 | 28.36  | A | O |
| ATOM | 79  | N   | LEU | A | 185 | 84.695 | 84.613 | -70.635 | 1.00 | 114.45 | A | N |
| ATOM | 80  | CA  | LEU | A | 185 | 85.920 | 84.832 | -71.392 | 1.00 | 114.45 | A | C |
| ATOM | 81  | CB  | LEU | A | 185 | 87.049 | 83.950 | -70.854 | 1.00 | 114.45 | A | C |
| ATOM | 82  | CG  | LEU | A | 185 | 88.432 | 84.149 | -71.477 | 1.00 | 114.45 | A | C |
| ATOM | 83  | CD1 | LEU | A | 185 | 88.898 | 85.586 | -71.304 | 1.00 | 114.45 | A | C |
| ATOM | 84  | CD2 | LEU | A | 185 | 89.436 | 83.179 | -70.873 | 1.00 | 114.45 | A | C |
| ATOM | 85  | C   | LEU | A | 185 | 85.694 | 84.551 | -72.874 | 1.00 | 114.45 | A | C |
| ATOM | 86  | O   | LEU | A | 185 | 86.379 | 85.105 | -73.733 | 1.00 | 114.45 | A | O |
| ATOM | 87  | N   | VAL | A | 186 | 84.728 | 83.685 | -73.165 | 1.00 | 33.25  | A | N |
| ATOM | 88  | CA  | VAL | A | 186 | 84.387 | 83.354 | -74.543 | 1.00 | 33.25  | A | C |
| ATOM | 89  | CB  | VAL | A | 186 | 83.357 | 82.211 | -74.612 | 1.00 | 33.25  | A | C |
| ATOM | 90  | CG1 | VAL | A | 186 | 82.938 | 81.961 | -76.052 | 1.00 | 33.25  | A | C |
| ATOM | 91  | CG2 | VAL | A | 186 | 83.926 | 80.946 | -73.988 | 1.00 | 33.25  | A | C |
| ATOM | 92  | C   | VAL | A | 186 | 83.831 | 84.575 | -75.266 | 1.00 | 33.25  | A | C |
| ATOM | 93  | O   | VAL | A | 186 | 84.239 | 84.886 | -76.385 | 1.00 | 33.25  | A | O |
| ATOM | 94  | N   | PHE | A | 187 | 82.902 | 85.266 | -74.614 | 1.00 | 90.63  | A | N |
| ATOM | 95  | CA  | PHE | A | 187 | 82.301 | 86.469 | -75.175 | 1.00 | 90.63  | A | C |
| ATOM | 96  | CB  | PHE | A | 187 | 81.174 | 86.972 | -74.270 | 1.00 | 90.63  | A | C |
| ATOM | 97  | CG  | PHE | A | 187 | 80.449 | 88.171 | -74.811 | 1.00 | 90.63  | A | C |
| ATOM | 98  | CD1 | PHE | A | 187 | 79.409 | 88.019 | -75.712 | 1.00 | 90.63  | A | C |
| ATOM | 99  | CD2 | PHE | A | 187 | 80.804 | 89.450 | -74.414 | 1.00 | 90.63  | A | C |
| ATOM | 100 | CE1 | PHE | A | 187 | 78.738 | 89.119 | -76.210 | 1.00 | 90.63  | A | C |
| ATOM | 101 | CE2 | PHE | A | 187 | 80.137 | 90.554 | -74.909 | 1.00 | 90.63  | A | C |
| ATOM | 102 | CZ  | PHE | A | 187 | 79.102 | 90.389 | -75.809 | 1.00 | 90.63  | A | C |
| ATOM | 103 | C   | PHE | A | 187 | 83.350 | 87.560 | -75.369 | 1.00 | 90.63  | A | C |
| ATOM | 104 | O   | PHE | A | 187 | 83.164 | 88.480 | -76.165 | 1.00 | 90.63  | A | O |
| ATOM | 105 | N   | TYR | A | 188 | 84.453 | 87.448 | -74.636 | 1.00 | 111.20 | A | N |
| ATOM | 106 | CA  | TYR | A | 188 | 85.541 | 88.414 | -74.730 | 1.00 | 111.20 | A | C |
| ATOM | 107 | CB  | TYR | A | 188 | 86.520 | 88.229 | -73.568 | 1.00 | 111.20 | A | C |
| ATOM | 108 | CG  | TYR | A | 188 | 87.699 | 89.177 | -73.594 | 1.00 | 111.20 | A | C |

|      |     |     |     |   |     |        |        |         |      |        |   |   |
|------|-----|-----|-----|---|-----|--------|--------|---------|------|--------|---|---|
| ATOM | 109 | CD1 | TYR | A | 188 | 87.612 | 90.440 | -73.024 | 1.00 | 111.20 | A | C |
| ATOM | 110 | CD2 | TYR | A | 188 | 88.900 | 88.806 | -74.182 | 1.00 | 111.20 | A | C |
| ATOM | 111 | CE1 | TYR | A | 188 | 88.688 | 91.308 | -73.043 | 1.00 | 111.20 | A | C |
| ATOM | 112 | CE2 | TYR | A | 188 | 89.981 | 89.667 | -74.206 | 1.00 | 111.20 | A | C |
| ATOM | 113 | CZ  | TYR | A | 188 | 89.869 | 90.916 | -73.635 | 1.00 | 111.20 | A | C |
| ATOM | 114 | OH  | TYR | A | 188 | 90.943 | 91.776 | -73.656 | 1.00 | 111.20 | A | O |
| ATOM | 115 | C   | TYR | A | 188 | 86.272 | 88.292 | -76.063 | 1.00 | 111.20 | A | C |
| ATOM | 116 | O   | TYR | A | 188 | 86.554 | 89.294 | -76.720 | 1.00 | 111.20 | A | O |
| ATOM | 117 | N   | TYR | A | 189 | 86.578 | 87.060 | -76.457 | 1.00 | 99.31  | A | N |
| ATOM | 118 | CA  | TYR | A | 189 | 87.266 | 86.810 | -77.719 | 1.00 | 99.31  | A | C |
| ATOM | 119 | CB  | TYR | A | 189 | 87.909 | 85.421 | -77.720 | 1.00 | 99.31  | A | C |
| ATOM | 120 | CG  | TYR | A | 189 | 89.097 | 85.294 | -76.794 | 1.00 | 99.31  | A | C |
| ATOM | 121 | CD1 | TYR | A | 189 | 88.941 | 84.856 | -75.486 | 1.00 | 99.31  | A | C |
| ATOM | 122 | CD2 | TYR | A | 189 | 90.377 | 85.612 | -77.228 | 1.00 | 99.31  | A | C |
| ATOM | 123 | CE1 | TYR | A | 189 | 90.026 | 84.739 | -74.637 | 1.00 | 99.31  | A | C |
| ATOM | 124 | CE2 | TYR | A | 189 | 91.467 | 85.498 | -76.387 | 1.00 | 99.31  | A | C |
| ATOM | 125 | CZ  | TYR | A | 189 | 91.286 | 85.061 | -75.093 | 1.00 | 99.31  | A | C |
| ATOM | 126 | OH  | TYR | A | 189 | 92.369 | 84.946 | -74.252 | 1.00 | 99.31  | A | O |
| ATOM | 127 | C   | TYR | A | 189 | 86.322 | 86.955 | -78.909 | 1.00 | 99.31  | A | C |
| ATOM | 128 | O   | TYR | A | 189 | 86.706 | 87.481 | -79.954 | 1.00 | 99.31  | A | O |
| ATOM | 129 | N   | VAL | A | 190 | 85.090 | 86.485 | -78.746 | 1.00 | 25.67  | A | N |
| ATOM | 130 | CA  | VAL | A | 190 | 84.087 | 86.585 | -79.801 | 1.00 | 25.67  | A | C |
| ATOM | 131 | CB  | VAL | A | 190 | 82.737 | 85.987 | -79.361 | 1.00 | 25.67  | A | C |
| ATOM | 132 | CG1 | VAL | A | 190 | 81.660 | 86.293 | -80.390 | 1.00 | 25.67  | A | C |
| ATOM | 133 | CG2 | VAL | A | 190 | 82.867 | 84.487 | -79.145 | 1.00 | 25.67  | A | C |
| ATOM | 134 | C   | VAL | A | 190 | 83.880 | 88.036 | -80.222 | 1.00 | 25.67  | A | C |
| ATOM | 135 | O   | VAL | A | 190 | 83.881 | 88.353 | -81.411 | 1.00 | 25.67  | A | O |
| ATOM | 136 | N   | THR | A | 191 | 83.706 | 88.913 | -79.239 | 1.00 | 113.27 | A | N |
| ATOM | 137 | CA  | THR | A | 191 | 83.520 | 90.334 | -79.504 | 1.00 | 113.27 | A | C |
| ATOM | 138 | CB  | THR | A | 191 | 83.281 | 91.126 | -78.205 | 1.00 | 113.27 | A | C |
| ATOM | 139 | OG1 | THR | A | 191 | 82.094 | 90.646 | -77.560 | 1.00 | 113.27 | A | O |
| ATOM | 140 | CG2 | THR | A | 191 | 83.124 | 92.608 | -78.505 | 1.00 | 113.27 | A | C |
| ATOM | 141 | C   | THR | A | 191 | 84.728 | 90.916 | -80.228 | 1.00 | 113.27 | A | C |
| ATOM | 142 | O   | THR | A | 191 | 84.587 | 91.586 | -81.252 | 1.00 | 113.27 | A | O |
| ATOM | 143 | N   | GLY | A | 192 | 85.916 | 90.652 | -79.692 | 1.00 | 21.76  | A | N |
| ATOM | 144 | CA  | GLY | A | 192 | 87.149 | 91.152 | -80.273 | 1.00 | 21.76  | A | C |
| ATOM | 145 | C   | GLY | A | 192 | 87.319 | 90.767 | -81.730 | 1.00 | 21.76  | A | C |
| ATOM | 146 | O   | GLY | A | 192 | 87.966 | 91.479 | -82.497 | 1.00 | 21.76  | A | O |
| ATOM | 147 | N   | PHE | A | 193 | 86.736 | 89.634 | -82.112 | 1.00 | 45.84  | A | N |
| ATOM | 148 | CA  | PHE | A | 193 | 86.811 | 89.163 | -83.490 | 1.00 | 45.84  | A | C |
| ATOM | 149 | CB  | PHE | A | 193 | 86.390 | 87.695 | -83.583 | 1.00 | 45.84  | A | C |
| ATOM | 150 | CG  | PHE | A | 193 | 87.334 | 86.748 | -82.899 | 1.00 | 45.84  | A | C |
| ATOM | 151 | CD1 | PHE | A | 193 | 88.637 | 87.128 | -82.622 | 1.00 | 45.84  | A | C |
| ATOM | 152 | CD2 | PHE | A | 193 | 86.920 | 85.478 | -82.535 | 1.00 | 45.84  | A | C |
| ATOM | 153 | CE1 | PHE | A | 193 | 89.509 | 86.258 | -81.994 | 1.00 | 45.84  | A | C |
| ATOM | 154 | CE2 | PHE | A | 193 | 87.787 | 84.604 | -81.906 | 1.00 | 45.84  | A | C |
| ATOM | 155 | CZ  | PHE | A | 193 | 89.083 | 84.995 | -81.635 | 1.00 | 45.84  | A | C |
| ATOM | 156 | C   | PHE | A | 193 | 85.953 | 90.020 | -84.416 | 1.00 | 45.84  | A | C |
| ATOM | 157 | O   | PHE | A | 193 | 86.402 | 90.436 | -85.484 | 1.00 | 45.84  | A | O |
| ATOM | 158 | N   | PHE | A | 194 | 84.717 | 90.282 | -84.000 | 1.00 | 127.60 | A | N |
| ATOM | 159 | CA  | PHE | A | 194 | 83.807 | 91.111 | -84.784 | 1.00 | 127.60 | A | C |
| ATOM | 160 | CB  | PHE | A | 194 | 82.410 | 91.123 | -84.159 | 1.00 | 127.60 | A | C |
| ATOM | 161 | CG  | PHE | A | 194 | 81.642 | 89.849 | -84.364 | 1.00 | 127.60 | A | C |
| ATOM | 162 | CD1 | PHE | A | 194 | 81.724 | 88.817 | -83.444 | 1.00 | 127.60 | A | C |
| ATOM | 163 | CD2 | PHE | A | 194 | 80.835 | 89.683 | -85.478 | 1.00 | 127.60 | A | C |
| ATOM | 164 | CE1 | PHE | A | 194 | 81.017 | 87.644 | -83.632 | 1.00 | 127.60 | A | C |
| ATOM | 165 | CE2 | PHE | A | 194 | 80.126 | 88.513 | -85.671 | 1.00 | 127.60 | A | C |
| ATOM | 166 | CZ  | PHE | A | 194 | 80.217 | 87.492 | -84.746 | 1.00 | 127.60 | A | C |
| ATOM | 167 | C   | PHE | A | 194 | 84.333 | 92.536 | -84.927 | 1.00 | 127.60 | A | C |
| ATOM | 168 | O   | PHE | A | 194 | 84.084 | 93.200 | -85.933 | 1.00 | 127.60 | A | O |
| ATOM | 169 | N   | ILE | A | 195 | 85.061 | 93.000 | -83.916 | 1.00 | 36.34  | A | N |
| ATOM | 170 | CA  | ILE | A | 195 | 85.645 | 94.335 | -83.946 | 1.00 | 36.34  | A | C |
| ATOM | 171 | CB  | ILE | A | 195 | 86.228 | 94.728 | -82.577 | 1.00 | 36.34  | A | C |
| ATOM | 172 | CG2 | ILE | A | 195 | 86.723 | 96.166 | -82.603 | 1.00 | 36.34  | A | C |
| ATOM | 173 | CG1 | ILE | A | 195 | 85.184 | 94.539 | -81.476 | 1.00 | 36.34  | A | C |
| ATOM | 174 | CD1 | ILE | A | 195 | 85.715 | 94.797 | -80.083 | 1.00 | 36.34  | A | C |
| ATOM | 175 | C   | ILE | A | 195 | 86.750 | 94.408 | -84.993 | 1.00 | 36.34  | A | C |
| ATOM | 176 | O   | ILE | A | 195 | 86.930 | 95.433 | -85.651 | 1.00 | 36.34  | A | O |

|      |     |     |     |   |     |        |         |          |      |        |   |   |
|------|-----|-----|-----|---|-----|--------|---------|----------|------|--------|---|---|
| ATOM | 177 | N   | ALA | A | 196 | 87.487 | 93.313  | -85.142  | 1.00 | 30.78  | A | N |
| ATOM | 178 | CA  | ALA | A | 196 | 88.568 | 93.242  | -86.116  | 1.00 | 30.78  | A | C |
| ATOM | 179 | CB  | ALA | A | 196 | 89.504 | 92.090  | -85.787  | 1.00 | 30.78  | A | C |
| ATOM | 180 | C   | ALA | A | 196 | 88.019 | 93.096  | -87.531  | 1.00 | 30.78  | A | C |
| ATOM | 181 | O   | ALA | A | 196 | 88.459 | 93.784  | -88.452  | 1.00 | 30.78  | A | O |
| ATOM | 182 | N   | VAL | A | 197 | 87.054 | 92.197  | -87.696  | 1.00 | 86.02  | A | N |
| ATOM | 183 | CA  | VAL | A | 197 | 86.442 | 91.954  | -88.997  | 1.00 | 86.02  | A | C |
| ATOM | 184 | CB  | VAL | A | 197 | 85.406 | 90.814  | -88.930  | 1.00 | 86.02  | A | C |
| ATOM | 185 | CG1 | VAL | A | 197 | 84.712 | 90.646  | -90.274  | 1.00 | 86.02  | A | C |
| ATOM | 186 | CG2 | VAL | A | 197 | 86.074 | 89.515  | -88.504  | 1.00 | 86.02  | A | C |
| ATOM | 187 | C   | VAL | A | 197 | 85.770 | 93.213  | -89.537  | 1.00 | 86.02  | A | C |
| ATOM | 188 | O   | VAL | A | 197 | 85.841 | 93.502  | -90.732  | 1.00 | 86.02  | A | O |
| ATOM | 189 | N   | SER | A | 198 | 85.121 | 93.960  | -88.650  | 1.00 | 41.44  | A | N |
| ATOM | 190 | CA  | SER | A | 198 | 84.440 | 95.190  | -89.039  | 1.00 | 41.44  | A | C |
| ATOM | 191 | CB  | SER | A | 198 | 83.652 | 95.765  | -87.860  | 1.00 | 41.44  | A | C |
| ATOM | 192 | OG  | SER | A | 198 | 84.511 | 96.086  | -86.779  | 1.00 | 41.44  | A | O |
| ATOM | 193 | C   | SER | A | 198 | 85.426 | 96.226  | -89.570  | 1.00 | 41.44  | A | C |
| ATOM | 194 | O   | SER | A | 198 | 85.079 | 97.048  | -90.419  | 1.00 | 41.44  | A | O |
| ATOM | 195 | N   | VAL | A | 199 | 86.655 | 96.182  | -89.065  | 1.00 | 108.02 | A | N |
| ATOM | 196 | CA  | VAL | A | 199 | 87.698 | 97.103  | -89.502  | 1.00 | 108.02 | A | C |
| ATOM | 197 | CB  | VAL | A | 199 | 88.792 | 97.272  | -88.430  | 1.00 | 108.02 | A | C |
| ATOM | 198 | CG1 | VAL | A | 199 | 89.927 | 98.136  | -88.960  | 1.00 | 108.02 | A | C |
| ATOM | 199 | CG2 | VAL | A | 199 | 88.206 | 97.872  | -87.162  | 1.00 | 108.02 | A | C |
| ATOM | 200 | C   | VAL | A | 199 | 88.339 | 96.633  | -90.804  | 1.00 | 108.02 | A | C |
| ATOM | 201 | O   | VAL | A | 199 | 88.551 | 97.424  | -91.723  | 1.00 | 108.02 | A | O |
| ATOM | 202 | N   | ILE | A | 200 | 88.645 | 95.341  | -90.875  | 1.00 | 89.21  | A | N |
| ATOM | 203 | CA  | ILE | A | 200 | 89.245 | 94.761  | -92.071  | 1.00 | 89.21  | A | C |
| ATOM | 204 | CB  | ILE | A | 200 | 89.591 | 93.274  | -91.868  | 1.00 | 89.21  | A | C |
| ATOM | 205 | CG2 | ILE | A | 200 | 90.171 | 92.683  | -93.144  | 1.00 | 89.21  | A | C |
| ATOM | 206 | CG1 | ILE | A | 200 | 90.573 | 93.109  | -90.707  | 1.00 | 89.21  | A | C |
| ATOM | 207 | CD1 | ILE | A | 200 | 91.885 | 93.832  | -90.911  | 1.00 | 89.21  | A | C |
| ATOM | 208 | C   | ILE | A | 200 | 88.316 | 94.901  | -93.272  | 1.00 | 89.21  | A | C |
| ATOM | 209 | O   | ILE | A | 200 | 88.733 | 95.341  | -94.344  | 1.00 | 89.21  | A | O |
| ATOM | 210 | N   | ALA | A | 201 | 87.055 | 94.526  | -93.085  | 1.00 | 33.80  | A | N |
| ATOM | 211 | CA  | ALA | A | 201 | 86.059 | 94.633  | -94.144  | 1.00 | 33.80  | A | C |
| ATOM | 212 | CB  | ALA | A | 201 | 84.734 | 94.042  | -93.690  | 1.00 | 33.80  | A | C |
| ATOM | 213 | C   | ALA | A | 201 | 85.878 | 96.084  | -94.574  | 1.00 | 33.80  | A | C |
| ATOM | 214 | O   | ALA | A | 201 | 85.665 | 96.370  | -95.752  | 1.00 | 33.80  | A | O |
| ATOM | 215 | N   | ASN | A | 202 | 85.966 | 96.996  | -93.610  | 1.00 | 47.57  | A | N |
| ATOM | 216 | CA  | ASN | A | 202 | 85.850 | 98.422  | -93.890  | 1.00 | 47.57  | A | C |
| ATOM | 217 | CB  | ASN | A | 202 | 86.012 | 99.233  | -92.602  | 1.00 | 47.57  | A | C |
| ATOM | 218 | CG  | ASN | A | 202 | 85.661 | 100.698 | -92.782  | 1.00 | 47.57  | A | C |
| ATOM | 219 | OD1 | ASN | A | 202 | 85.833 | 101.264 | -93.862  | 1.00 | 47.57  | A | O |
| ATOM | 220 | ND2 | ASN | A | 202 | 85.166 | 101.321 | -91.720  | 1.00 | 47.57  | A | N |
| ATOM | 221 | C   | ASN | A | 202 | 86.880 | 98.861  | -94.925  | 1.00 | 47.57  | A | C |
| ATOM | 222 | O   | ASN | A | 202 | 86.572 | 99.630  | -95.836  | 1.00 | 47.57  | A | O |
| ATOM | 223 | N   | VAL | A | 203 | 88.102 | 98.360  | -94.780  | 1.00 | 47.39  | A | N |
| ATOM | 224 | CA  | VAL | A | 203 | 89.176 | 98.675  | -95.713  | 1.00 | 47.39  | A | C |
| ATOM | 225 | CB  | VAL | A | 203 | 90.536 | 98.166  | -95.198  | 1.00 | 47.39  | A | C |
| ATOM | 226 | CG1 | VAL | A | 203 | 91.641 | 98.505  | -96.186  | 1.00 | 47.39  | A | C |
| ATOM | 227 | CG2 | VAL | A | 203 | 90.838 | 98.756  | -93.829  | 1.00 | 47.39  | A | C |
| ATOM | 228 | C   | VAL | A | 203 | 88.900 | 98.068  | -97.086  | 1.00 | 47.39  | A | C |
| ATOM | 229 | O   | VAL | A | 203 | 89.198 | 98.674  | -98.115  | 1.00 | 47.39  | A | O |
| ATOM | 230 | N   | VAL | A | 204 | 88.323 | 96.871  | -97.092  | 1.00 | 117.92 | A | N |
| ATOM | 231 | CA  | VAL | A | 204 | 88.007 | 96.178  | -98.336  | 1.00 | 117.92 | A | C |
| ATOM | 232 | CB  | VAL | A | 204 | 87.570 | 94.723  | -98.077  | 1.00 | 117.92 | A | C |
| ATOM | 233 | CG1 | VAL | A | 204 | 87.346 | 93.992  | -99.392  | 1.00 | 117.92 | A | C |
| ATOM | 234 | CG2 | VAL | A | 204 | 88.610 | 94.000  | -97.236  | 1.00 | 117.92 | A | C |
| ATOM | 235 | C   | VAL | A | 204 | 86.908 | 96.907  | -99.105  | 1.00 | 117.92 | A | C |
| ATOM | 236 | O   | VAL | A | 204 | 86.843 | 96.834  | -100.331 | 1.00 | 117.92 | A | O |
| ATOM | 237 | N   | GLU | A | 205 | 86.048 | 97.611  | -98.376  | 1.00 | 86.49  | A | N |
| ATOM | 238 | CA  | GLU | A | 205 | 84.970 | 98.373  | -98.996  | 1.00 | 86.49  | A | C |
| ATOM | 239 | CB  | GLU | A | 205 | 84.002 | 98.897  | -97.934  | 1.00 | 86.49  | A | C |
| ATOM | 240 | CG  | GLU | A | 205 | 83.292 | 97.811  | -97.143  | 1.00 | 86.49  | A | C |
| ATOM | 241 | CD  | GLU | A | 205 | 82.352 | 98.377  | -96.096  | 1.00 | 86.49  | A | C |
| ATOM | 242 | OE1 | GLU | A | 205 | 82.258 | 99.618  | -95.991  | 1.00 | 86.49  | A | O |
| ATOM | 243 | OE2 | GLU | A | 205 | 81.709 | 97.583  | -95.380  | 1.00 | 86.49  | A | O |
| ATOM | 244 | C   | GLU | A | 205 | 85.523 | 99.534  | -99.815  | 1.00 | 86.49  | A | C |

|      |     |     |     |   |     |        |                 |      |        |   |   |
|------|-----|-----|-----|---|-----|--------|-----------------|------|--------|---|---|
| ATOM | 245 | O   | GLU | A | 205 | 84.857 | 100.044-100.715 | 1.00 | 86.49  | A | O |
| ATOM | 246 | N   | THR | A | 206 | 86.746 | 99.946-99.496   | 1.00 | 119.91 | A | N |
| ATOM | 247 | CA  | THR | A | 206 | 87.383 | 101.064-100.181 | 1.00 | 119.91 | A | C |
| ATOM | 248 | CB  | THR | A | 206 | 88.425 | 101.754-99.280  | 1.00 | 119.91 | A | C |
| ATOM | 249 | OG1 | THR | A | 206 | 87.837 | 102.054-98.008  | 1.00 | 119.91 | A | O |
| ATOM | 250 | CG2 | THR | A | 206 | 88.921 | 103.042-99.921  | 1.00 | 119.91 | A | C |
| ATOM | 251 | C   | THR | A | 206 | 88.054 | 100.611-101.475 | 1.00 | 119.91 | A | C |
| ATOM | 252 | O   | THR | A | 206 | 88.332 | 101.423-102.358 | 1.00 | 119.91 | A | O |
| ATOM | 253 | N   | VAL | A | 207 | 88.309 | 99.310-101.580  | 1.00 | 81.16  | A | N |
| ATOM | 254 | CA  | VAL | A | 207 | 88.919 | 98.737-102.776  | 1.00 | 81.16  | A | C |
| ATOM | 255 | CB  | VAL | A | 207 | 88.837 | 97.196-102.766  | 1.00 | 81.16  | A | C |
| ATOM | 256 | CG1 | VAL | A | 207 | 89.277 | 96.626-104.106  | 1.00 | 81.16  | A | C |
| ATOM | 257 | CG2 | VAL | A | 207 | 89.680 | 96.627-101.634  | 1.00 | 81.16  | A | C |
| ATOM | 258 | C   | VAL | A | 207 | 88.252 | 99.271-104.040  | 1.00 | 81.16  | A | C |
| ATOM | 259 | O   | VAL | A | 207 | 87.025 | 99.280-104.140  | 1.00 | 81.16  | A | O |
| ATOM | 260 | N   | PRO | A | 208 | 89.065 | 99.728-105.005  | 1.00 | 163.31 | A | N |
| ATOM | 261 | CA  | PRO | A | 208 | 88.593 | 100.307-106.268 | 1.00 | 163.31 | A | C |
| ATOM | 262 | CD  | PRO | A | 208 | 90.536 | 99.713-104.926  | 1.00 | 163.31 | A | C |
| ATOM | 263 | CB  | PRO | A | 208 | 89.849 | 100.295-107.138 | 1.00 | 163.31 | A | C |
| ATOM | 264 | CG  | PRO | A | 208 | 90.959 | 100.458-106.166 | 1.00 | 163.31 | A | C |
| ATOM | 265 | C   | PRO | A | 208 | 87.490 | 99.482-106.925  | 1.00 | 163.31 | A | C |
| ATOM | 266 | O   | PRO | A | 208 | 87.778 | 98.528-107.649  | 1.00 | 163.31 | A | O |
| ATOM | 267 | N   | CYS | A | 209 | 86.240 | 99.857-106.671  | 1.00 | 122.13 | A | N |
| ATOM | 268 | CA  | CYS | A | 209 | 85.088 | 99.184-107.262  | 1.00 | 122.13 | A | C |
| ATOM | 269 | CB  | CYS | A | 209 | 84.985 | 97.742-106.760  | 1.00 | 122.13 | A | C |
| ATOM | 270 | SG  | CYS | A | 209 | 84.665 | 97.586-104.988  | 1.00 | 122.13 | A | S |
| ATOM | 271 | C   | CYS | A | 209 | 83.804 | 99.941-106.941  | 1.00 | 122.13 | A | C |
| ATOM | 272 | O   | CYS | A | 209 | 83.841 | 101.116-106.575 | 1.00 | 122.13 | A | O |
| ATOM | 273 | N   | GLY | A | 210 | 82.669 | 99.263-107.078  | 1.00 | 296.88 | A | N |
| ATOM | 274 | CA  | GLY | A | 210 | 81.381 | 99.863-106.783  | 1.00 | 296.88 | A | C |
| ATOM | 275 | C   | GLY | A | 210 | 80.824 | 100.672-107.939 | 1.00 | 296.88 | A | C |
| ATOM | 276 | O   | GLY | A | 210 | 81.373 | 100.660-109.040 | 1.00 | 296.88 | A | O |
| ATOM | 277 | N   | SER | A | 211 | 79.727 | 101.377-107.683 | 1.00 | 230.38 | A | N |
| ATOM | 278 | CA  | SER | A | 211 | 79.087 | 102.199-108.704 | 1.00 | 230.38 | A | C |
| ATOM | 279 | CB  | SER | A | 211 | 77.638 | 101.755-108.915 | 1.00 | 230.38 | A | C |
| ATOM | 280 | OG  | SER | A | 211 | 77.576 | 100.406-109.347 | 1.00 | 230.38 | A | O |
| ATOM | 281 | C   | SER | A | 211 | 79.132 | 103.678-108.332 | 1.00 | 230.38 | A | C |
| ATOM | 282 | O   | SER | A | 211 | 80.208 | 104.260-108.192 | 1.00 | 230.38 | A | O |
| ATOM | 283 | N   | SER | A | 212 | 77.957 | 104.279-108.174 | 1.00 | 146.29 | A | N |
| ATOM | 284 | CA  | SER | A | 212 | 77.859 | 105.691-107.816 | 1.00 | 146.29 | A | C |
| ATOM | 285 | CB  | SER | A | 212 | 77.220 | 106.497-108.953 | 1.00 | 146.29 | A | C |
| ATOM | 286 | OG  | SER | A | 212 | 78.001 | 106.425-110.133 | 1.00 | 146.29 | A | O |
| ATOM | 287 | C   | SER | A | 212 | 77.101 | 105.915-106.504 | 1.00 | 146.29 | A | C |
| ATOM | 288 | O   | SER | A | 212 | 77.609 | 106.584-105.604 | 1.00 | 146.29 | A | O |
| ATOM | 289 | N   | PRO | A | 213 | 75.884 | 105.355-106.389 | 1.00 | 129.39 | A | N |
| ATOM | 290 | CA  | PRO | A | 213 | 75.094 | 105.556-105.171 | 1.00 | 129.39 | A | C |
| ATOM | 291 | CD  | PRO | A | 213 | 75.161 | 104.528-107.365 | 1.00 | 129.39 | A | C |
| ATOM | 292 | CB  | PRO | A | 213 | 73.675 | 105.144-105.594 | 1.00 | 129.39 | A | C |
| ATOM | 293 | CG  | PRO | A | 213 | 73.743 | 104.876-107.081 | 1.00 | 129.39 | A | C |
| ATOM | 294 | C   | PRO | A | 213 | 75.569 | 104.647-104.045 | 1.00 | 129.39 | A | C |
| ATOM | 295 | O   | PRO | A | 213 | 75.239 | 104.879-102.884 | 1.00 | 129.39 | A | O |
| ATOM | 296 | N   | GLY | A | 214 | 76.328 | 103.616-104.400 | 1.00 | 105.51 | A | N |
| ATOM | 297 | CA  | GLY | A | 214 | 76.833 | 102.670-103.426 | 1.00 | 105.51 | A | C |
| ATOM | 298 | C   | GLY | A | 214 | 78.315 | 102.853-103.164 | 1.00 | 105.51 | A | C |
| ATOM | 299 | O   | GLY | A | 214 | 78.913 | 102.118-102.378 | 1.00 | 105.51 | A | O |
| ATOM | 300 | N   | HIS | A | 215 | 78.908 | 103.841-103.826 | 1.00 | 142.23 | A | N |
| ATOM | 301 | CA  | HIS | A | 215 | 80.329 | 104.125-103.668 | 1.00 | 142.23 | A | C |
| ATOM | 302 | ND1 | HIS | A | 215 | 83.321 | 104.121-104.618 | 1.00 | 142.23 | A | N |
| ATOM | 303 | CG  | HIS | A | 215 | 82.354 | 105.072-104.862 | 1.00 | 142.23 | A | C |
| ATOM | 304 | CB  | HIS | A | 215 | 80.897 | 104.740-104.948 | 1.00 | 142.23 | A | C |
| ATOM | 305 | NE2 | HIS | A | 215 | 84.347 | 105.991-104.816 | 1.00 | 142.23 | A | N |
| ATOM | 306 | CD2 | HIS | A | 215 | 83.009 | 106.251-104.985 | 1.00 | 142.23 | A | C |
| ATOM | 307 | CE1 | HIS | A | 215 | 84.509 | 104.699-104.596 | 1.00 | 142.23 | A | C |
| ATOM | 308 | C   | HIS | A | 215 | 80.581 | 105.053-102.484 | 1.00 | 142.23 | A | C |
| ATOM | 309 | O   | HIS | A | 215 | 81.593 | 104.932-101.793 | 1.00 | 142.23 | A | O |
| ATOM | 310 | N   | ILE | A | 216 | 79.656 | 105.980-102.257 | 1.00 | 67.89  | A | N |
| ATOM | 311 | CA  | ILE | A | 216 | 79.776 | 106.929-101.157 | 1.00 | 67.89  | A | C |
| ATOM | 312 | CB  | ILE | A | 216 | 78.737 | 108.060-101.268 | 1.00 | 67.89  | A | C |



|      |     |     |     |   |     |        |                 |      |        |   |   |
|------|-----|-----|-----|---|-----|--------|-----------------|------|--------|---|---|
| ATOM | 313 | CG2 | ILE | A | 216 | 78.930 | 109.071-100.149 | 1.00 | 67.89  | A | C |
| ATOM | 314 | CG1 | ILE | A | 216 | 78.832 | 108.740-102.635 | 1.00 | 67.89  | A | C |
| ATOM | 315 | CD1 | ILE | A | 216 | 77.849 | 109.874-102.822 | 1.00 | 67.89  | A | C |
| ATOM | 316 | C   | ILE | A | 216 | 79.608 | 106.228 -99.813 | 1.00 | 67.89  | A | C |
| ATOM | 317 | O   | ILE | A | 216 | 80.430 | 106.389 -98.911 | 1.00 | 67.89  | A | O |
| ATOM | 318 | N   | LYS | A | 217 | 78.537 | 105.451 -99.687 | 1.00 | 172.29 | A | N |
| ATOM | 319 | CA  | LYS | A | 217 | 78.272 | 104.706 -98.463 | 1.00 | 172.29 | A | C |
| ATOM | 320 | CB  | LYS | A | 217 | 76.786 | 104.354 -98.362 | 1.00 | 172.29 | A | C |
| ATOM | 321 | CG  | LYS | A | 217 | 76.370 | 103.764 -97.022 | 1.00 | 172.29 | A | C |
| ATOM | 322 | CD  | LYS | A | 217 | 76.644 | 104.734 -95.883 | 1.00 | 172.29 | A | C |
| ATOM | 323 | CE  | LYS | A | 217 | 76.236 | 104.142 -94.543 | 1.00 | 172.29 | A | C |
| ATOM | 324 | NZ  | LYS | A | 217 | 76.502 | 105.079 -93.415 | 1.00 | 172.29 | A | N |
| ATOM | 325 | C   | LYS | A | 217 | 79.123 | 103.442 -98.418 | 1.00 | 172.29 | A | C |
| ATOM | 326 | O   | LYS | A | 217 | 79.099 | 102.697 -97.438 | 1.00 | 172.29 | A | O |
| ATOM | 327 | N   | GLU | A | 218 | 79.873 | 103.208 -99.492 | 1.00 | 302.48 | A | N |
| ATOM | 328 | CA  | GLU | A | 218 | 80.763 | 102.054 -99.590 | 1.00 | 302.48 | A | C |
| ATOM | 329 | CB  | GLU | A | 218 | 81.744 | 102.026 -98.414 | 1.00 | 302.48 | A | C |
| ATOM | 330 | CG  | GLU | A | 218 | 82.599 | 103.277 -98.286 | 1.00 | 302.48 | A | C |
| ATOM | 331 | CD  | GLU | A | 218 | 83.534 | 103.472 -99.464 | 1.00 | 302.48 | A | C |
| ATOM | 332 | OE1 | GLU | A | 218 | 83.686 | 102.529-100.270 | 1.00 | 302.48 | A | O |
| ATOM | 333 | OE2 | GLU | A | 218 | 84.119 | 104.569 -99.585 | 1.00 | 302.48 | A | O |
| ATOM | 334 | C   | GLU | A | 218 | 79.996 | 100.737 -99.672 | 1.00 | 302.48 | A | C |
| ATOM | 335 | O   | GLU | A | 218 | 80.595 | 99.666 -99.765  | 1.00 | 302.48 | A | O |
| ATOM | 336 | N   | LEU | A | 219 | 78.670 | 100.824 -99.640 | 1.00 | 167.09 | A | N |
| ATOM | 337 | CA  | LEU | A | 219 | 77.822 | 99.640 -99.734  | 1.00 | 167.09 | A | C |
| ATOM | 338 | CB  | LEU | A | 219 | 77.928 | 98.792 -98.460  | 1.00 | 167.09 | A | C |
| ATOM | 339 | CG  | LEU | A | 219 | 77.932 | 99.497 -97.100  | 1.00 | 167.09 | A | C |
| ATOM | 340 | CD1 | LEU | A | 219 | 76.532 | 99.924 -96.689  | 1.00 | 167.09 | A | C |
| ATOM | 341 | CD2 | LEU | A | 219 | 78.535 | 98.588 -96.042  | 1.00 | 167.09 | A | C |
| ATOM | 342 | C   | LEU | A | 219 | 76.368 | 100.000-100.036 | 1.00 | 167.09 | A | C |
| ATOM | 343 | O   | LEU | A | 219 | 75.752 | 100.784 -99.316 | 1.00 | 167.09 | A | O |
| ATOM | 344 | N   | PRO | A | 220 | 75.823 | 99.433-101.122  | 1.00 | 155.58 | A | N |
| ATOM | 345 | CA  | PRO | A | 220 | 74.432 | 99.659-101.528  | 1.00 | 155.58 | A | C |
| ATOM | 346 | CD  | PRO | A | 220 | 76.556 | 98.611-102.099  | 1.00 | 155.58 | A | C |
| ATOM | 347 | CB  | PRO | A | 220 | 74.317 | 98.865-102.835  | 1.00 | 155.58 | A | C |
| ATOM | 348 | CG  | PRO | A | 220 | 75.719 | 98.738-103.331  | 1.00 | 155.58 | A | C |
| ATOM | 349 | C   | PRO | A | 220 | 73.448 | 99.112-100.499  | 1.00 | 155.58 | A | C |
| ATOM | 350 | O   | PRO | A | 220 | 73.258 | 97.899-100.413  | 1.00 | 155.58 | A | O |
| ATOM | 351 | N   | CYS | A | 221 | 72.830 | 100.003 -99.730 | 1.00 | 60.66  | A | N |
| ATOM | 352 | CA  | CYS | A | 221 | 71.871 | 99.595 -98.710  | 1.00 | 60.66  | A | C |
| ATOM | 353 | CB  | CYS | A | 221 | 71.559 | 100.762 -97.772 | 1.00 | 60.66  | A | C |
| ATOM | 354 | SG  | CYS | A | 221 | 72.998 | 101.419 -96.896 | 1.00 | 60.66  | A | S |
| ATOM | 355 | C   | CYS | A | 221 | 70.586 | 99.069 -99.342  | 1.00 | 60.66  | A | C |
| ATOM | 356 | O   | CYS | A | 221 | 69.954 | 99.754-100.146  | 1.00 | 60.66  | A | O |
| ATOM | 357 | N   | GLY | A | 222 | 70.208 | 97.850 -98.974  | 1.00 | 31.84  | A | N |
| ATOM | 358 | CA  | GLY | A | 222 | 69.008 | 97.231 -99.507  | 1.00 | 31.84  | A | C |
| ATOM | 359 | C   | GLY | A | 222 | 68.591 | 95.997 -98.730  | 1.00 | 31.84  | A | C |
| ATOM | 360 | O   | GLY | A | 222 | 69.367 | 95.453 -97.944  | 1.00 | 31.84  | A | O |
| ATOM | 361 | N   | GLU | A | 223 | 67.358 | 95.557 -98.953  | 1.00 | 109.66 | A | N |
| ATOM | 362 | CA  | GLU | A | 223 | 66.829 | 94.376 -98.281  | 1.00 | 109.66 | A | C |
| ATOM | 363 | CB  | GLU | A | 223 | 65.302 | 94.454 -98.192  | 1.00 | 109.66 | A | C |
| ATOM | 364 | CG  | GLU | A | 223 | 64.647 | 93.312 -97.425  | 1.00 | 109.66 | A | C |
| ATOM | 365 | CD  | GLU | A | 223 | 64.444 | 92.071 -98.275  | 1.00 | 109.66 | A | C |
| ATOM | 366 | OE1 | GLU | A | 223 | 64.563 | 92.169 -99.514  | 1.00 | 109.66 | A | O |
| ATOM | 367 | OE2 | GLU | A | 223 | 64.165 | 90.996 -97.702  | 1.00 | 109.66 | A | O |
| ATOM | 368 | C   | GLU | A | 223 | 67.261 | 93.105 -99.005  | 1.00 | 109.66 | A | C |
| ATOM | 369 | O   | GLU | A | 223 | 67.319 | 92.028 -98.411  | 1.00 | 109.66 | A | O |
| ATOM | 370 | N   | ARG | A | 224 | 67.571 | 93.241-100.291  | 1.00 | 102.89 | A | N |
| ATOM | 371 | CA  | ARG | A | 224 | 67.986 | 92.107-101.110  | 1.00 | 102.89 | A | C |
| ATOM | 372 | CB  | ARG | A | 224 | 68.303 | 92.564-102.535  | 1.00 | 102.89 | A | C |
| ATOM | 373 | CG  | ARG | A | 224 | 67.130 | 93.203-103.260  | 1.00 | 102.89 | A | C |
| ATOM | 374 | CD  | ARG | A | 224 | 67.524 | 93.654-104.658  | 1.00 | 102.89 | A | C |
| ATOM | 375 | NE  | ARG | A | 224 | 66.417 | 94.300-105.356  | 1.00 | 102.89 | A | N |
| ATOM | 376 | CZ  | ARG | A | 224 | 66.495 | 94.790-106.588  | 1.00 | 102.89 | A | C |
| ATOM | 377 | NH1 | ARG | A | 224 | 67.633 | 94.709-107.265  | 1.00 | 102.89 | A | N |
| ATOM | 378 | NH2 | ARG | A | 224 | 65.437 | 95.362-107.145  | 1.00 | 102.89 | A | N |
| ATOM | 379 | C   | ARG | A | 224 | 69.193 | 91.386-100.515  | 1.00 | 102.89 | A | C |
| ATOM | 380 | O   | ARG | A | 224 | 69.368 | 90.184-100.716  | 1.00 | 102.89 | A | O |

|      |     |     |     |   |     |        |        |          |            |   |   |
|------|-----|-----|-----|---|-----|--------|--------|----------|------------|---|---|
| ATOM | 381 | N   | TYR | A | 225 | 70.022 | 92.128 | -99.787  | 1.00235.34 | A | N |
| ATOM | 382 | CA  | TYR | A | 225 | 71.218 | 91.566 | -99.167  | 1.00235.34 | A | C |
| ATOM | 383 | CB  | TYR | A | 225 | 70.838 | 90.563 | -98.075  | 1.00235.34 | A | C |
| ATOM | 384 | CG  | TYR | A | 225 | 70.032 | 91.159 | -96.944  | 1.00235.34 | A | C |
| ATOM | 385 | CD1 | TYR | A | 225 | 70.100 | 92.515 | -96.655  | 1.00235.34 | A | C |
| ATOM | 386 | CD2 | TYR | A | 225 | 69.201 | 90.364 | -96.165  | 1.00235.34 | A | C |
| ATOM | 387 | CE1 | TYR | A | 225 | 69.364 | 93.063 | -95.622  | 1.00235.34 | A | C |
| ATOM | 388 | CE2 | TYR | A | 225 | 68.461 | 90.904 | -95.130  | 1.00235.34 | A | C |
| ATOM | 389 | CZ  | TYR | A | 225 | 68.546 | 92.253 | -94.863  | 1.00235.34 | A | C |
| ATOM | 390 | OH  | TYR | A | 225 | 67.811 | 92.794 | -93.834  | 1.00235.34 | A | O |
| ATOM | 391 | C   | TYR | A | 225 | 72.122 | 90.899 | -100.198 | 1.00235.34 | A | C |
| ATOM | 392 | O   | TYR | A | 225 | 72.683 | 89.833 | -99.947  | 1.00235.34 | A | O |
| ATOM | 393 | N   | ALA | A | 226 | 72.258 | 91.533 | -101.358 | 1.00 79.48 | A | N |
| ATOM | 394 | CA  | ALA | A | 226 | 73.095 | 91.000 | -102.427 | 1.00 79.48 | A | C |
| ATOM | 395 | CB  | ALA | A | 226 | 72.681 | 91.587 | -103.769 | 1.00 79.48 | A | C |
| ATOM | 396 | C   | ALA | A | 226 | 74.572 | 91.270 | -102.159 | 1.00 79.48 | A | C |
| ATOM | 397 | O   | ALA | A | 226 | 75.402 | 90.365 | -102.239 | 1.00 79.48 | A | O |
| ATOM | 398 | N   | VAL | A | 227 | 74.893 | 92.519 | -101.841 | 1.00226.17 | A | N |
| ATOM | 399 | CA  | VAL | A | 227 | 76.269 | 92.906 | -101.554 | 1.00226.17 | A | C |
| ATOM | 400 | CB  | VAL | A | 227 | 76.411 | 94.435 | -101.430 | 1.00226.17 | A | C |
| ATOM | 401 | CG1 | VAL | A | 227 | 77.844 | 94.808 | -101.082 | 1.00226.17 | A | C |
| ATOM | 402 | CG2 | VAL | A | 227 | 75.976 | 95.113 | -102.719 | 1.00226.17 | A | C |
| ATOM | 403 | C   | VAL | A | 227 | 76.766 | 92.247 | -100.271 | 1.00226.17 | A | C |
| ATOM | 404 | O   | VAL | A | 227 | 76.162 | 92.401 | -99.209  | 1.00226.17 | A | O |
| ATOM | 405 | N   | ALA | A | 228 | 77.868 | 91.512 | -100.378 | 1.00 52.15 | A | N |
| ATOM | 406 | CA  | ALA | A | 228 | 78.444 | 90.822 | -99.229  | 1.00 52.15 | A | C |
| ATOM | 407 | CB  | ALA | A | 228 | 79.563 | 89.894 | -99.675  | 1.00 52.15 | A | C |
| ATOM | 408 | C   | ALA | A | 228 | 78.956 | 91.811 | -98.188  | 1.00 52.15 | A | C |
| ATOM | 409 | O   | ALA | A | 228 | 78.946 | 91.527 | -96.991  | 1.00 52.15 | A | O |
| ATOM | 410 | N   | PHE | A | 229 | 79.403 | 92.973 | -98.654  | 1.00 68.64 | A | N |
| ATOM | 411 | CA  | PHE | A | 229 | 79.912 | 94.010 | -97.765  | 1.00 68.64 | A | C |
| ATOM | 412 | CB  | PHE | A | 229 | 80.483 | 95.176 | -98.575  | 1.00 68.64 | A | C |
| ATOM | 413 | CG  | PHE | A | 229 | 81.617 | 94.788 | -99.480  | 1.00 68.64 | A | C |
| ATOM | 414 | CD1 | PHE | A | 229 | 82.925 | 94.831 | -99.028  | 1.00 68.64 | A | C |
| ATOM | 415 | CD2 | PHE | A | 229 | 81.375 | 94.380 | -100.781 | 1.00 68.64 | A | C |
| ATOM | 416 | CE1 | PHE | A | 229 | 83.971 | 94.475 | -99.858  | 1.00 68.64 | A | C |
| ATOM | 417 | CE2 | PHE | A | 229 | 82.417 | 94.022 | -101.615 | 1.00 68.64 | A | C |
| ATOM | 418 | CZ  | PHE | A | 229 | 83.717 | 94.070 | -101.152 | 1.00 68.64 | A | C |
| ATOM | 419 | C   | PHE | A | 229 | 78.820 | 94.511 | -96.827  | 1.00 68.64 | A | C |
| ATOM | 420 | O   | PHE | A | 229 | 79.080 | 94.817 | -95.664  | 1.00 68.64 | A | O |
| ATOM | 421 | N   | PHE | A | 230 | 77.598 | 94.593 | -97.341  | 1.00 73.77 | A | N |
| ATOM | 422 | CA  | PHE | A | 230 | 76.463 | 95.049 | -96.549  | 1.00 73.77 | A | C |
| ATOM | 423 | CB  | PHE | A | 230 | 75.281 | 95.398 | -97.455  | 1.00 73.77 | A | C |
| ATOM | 424 | CG  | PHE | A | 230 | 74.086 | 95.930 | -96.715  | 1.00 73.77 | A | C |
| ATOM | 425 | CD1 | PHE | A | 230 | 73.986 | 97.278 | -96.413  | 1.00 73.77 | A | C |
| ATOM | 426 | CD2 | PHE | A | 230 | 73.062 | 95.083 | -96.325  | 1.00 73.77 | A | C |
| ATOM | 427 | CE1 | PHE | A | 230 | 72.888 | 97.770 | -95.735  | 1.00 73.77 | A | C |
| ATOM | 428 | CE2 | PHE | A | 230 | 71.962 | 95.570 | -95.646  | 1.00 73.77 | A | C |
| ATOM | 429 | CZ  | PHE | A | 230 | 71.875 | 96.915 | -95.351  | 1.00 73.77 | A | C |
| ATOM | 430 | C   | PHE | A | 230 | 76.050 | 93.993 | -95.530  | 1.00 73.77 | A | C |
| ATOM | 431 | O   | PHE | A | 230 | 75.614 | 94.318 | -94.427  | 1.00 73.77 | A | O |
| ATOM | 432 | N   | CYS | A | 231 | 76.189 | 92.727 | -95.910  | 1.00 36.96 | A | N |
| ATOM | 433 | CA  | CYS | A | 231 | 75.844 | 91.619 | -95.028  | 1.00 36.96 | A | C |
| ATOM | 434 | CB  | CYS | A | 231 | 75.846 | 90.299 | -95.801  | 1.00 36.96 | A | C |
| ATOM | 435 | SG  | CYS | A | 231 | 74.656 | 90.227 | -97.159  | 1.00 36.96 | A | S |
| ATOM | 436 | C   | CYS | A | 231 | 76.808 | 91.540 | -93.850  | 1.00 36.96 | A | C |
| ATOM | 437 | O   | CYS | A | 231 | 76.398 | 91.292 | -92.716  | 1.00 36.96 | A | O |
| ATOM | 438 | N   | LEU | A | 232 | 78.090 | 91.753 | -94.126  | 1.00104.38 | A | N |
| ATOM | 439 | CA  | LEU | A | 232 | 79.112 | 91.725 | -93.087  | 1.00104.38 | A | C |
| ATOM | 440 | CB  | LEU | A | 232 | 80.510 | 91.694 | -93.708  | 1.00104.38 | A | C |
| ATOM | 441 | CG  | LEU | A | 232 | 80.838 | 90.487 | -94.589  | 1.00104.38 | A | C |
| ATOM | 442 | CD1 | LEU | A | 232 | 82.227 | 90.624 | -95.193  | 1.00104.38 | A | C |
| ATOM | 443 | CD2 | LEU | A | 232 | 80.718 | 89.195 | -93.796  | 1.00104.38 | A | C |
| ATOM | 444 | C   | LEU | A | 232 | 78.976 | 92.927 | -92.159  | 1.00104.38 | A | C |
| ATOM | 445 | O   | LEU | A | 232 | 79.132 | 92.806 | -90.944  | 1.00104.38 | A | O |
| ATOM | 446 | N   | ASP | A | 233 | 78.686 | 94.086 | -92.741  | 1.00 58.49 | A | N |
| ATOM | 447 | CA  | ASP | A | 233 | 78.514 | 95.310 | -91.968  | 1.00 58.49 | A | C |
| ATOM | 448 | CB  | ASP | A | 233 | 78.323 | 96.509 | -92.899  | 1.00 58.49 | A | C |

|      |     |     |     |   |     |        |        |         |      |        |   |   |
|------|-----|-----|-----|---|-----|--------|--------|---------|------|--------|---|---|
| ATOM | 449 | CG  | ASP | A | 233 | 78.149 | 97.811 | -92.143 | 1.00 | 58.49  | A | C |
| ATOM | 450 | OD1 | ASP | A | 233 | 78.718 | 97.940 | -91.038 | 1.00 | 58.49  | A | O |
| ATOM | 451 | OD2 | ASP | A | 233 | 77.444 | 98.707 | -92.653 | 1.00 | 58.49  | A | O |
| ATOM | 452 | C   | ASP | A | 233 | 77.328 | 95.191 | -91.016 | 1.00 | 58.49  | A | C |
| ATOM | 453 | O   | ASP | A | 233 | 77.426 | 95.545 | -89.842 | 1.00 | 58.49  | A | O |
| ATOM | 454 | N   | THR | A | 234 | 76.210 | 94.690 | -91.532 | 1.00 | 127.80 | A | N |
| ATOM | 455 | CA  | THR | A | 234 | 75.008 | 94.508 | -90.727 | 1.00 | 127.80 | A | C |
| ATOM | 456 | CB  | THR | A | 234 | 73.817 | 94.043 | -91.587 | 1.00 | 127.80 | A | C |
| ATOM | 457 | OG1 | THR | A | 234 | 73.560 | 95.009 | -92.614 | 1.00 | 127.80 | A | O |
| ATOM | 458 | CG2 | THR | A | 234 | 72.571 | 93.876 | -90.731 | 1.00 | 127.80 | A | C |
| ATOM | 459 | C   | THR | A | 234 | 75.247 | 93.495 | -89.612 | 1.00 | 127.80 | A | C |
| ATOM | 460 | O   | THR | A | 234 | 74.723 | 93.637 | -88.508 | 1.00 | 127.80 | A | O |
| ATOM | 461 | N   | ALA | A | 235 | 76.044 | 92.473 | -89.910 | 1.00 | 35.61  | A | N |
| ATOM | 462 | CA  | ALA | A | 235 | 76.363 | 91.440 | -88.932 | 1.00 | 35.61  | A | C |
| ATOM | 463 | CB  | ALA | A | 235 | 77.120 | 90.299 | -89.595 | 1.00 | 35.61  | A | C |
| ATOM | 464 | C   | ALA | A | 235 | 77.169 | 92.011 | -87.770 | 1.00 | 35.61  | A | C |
| ATOM | 465 | O   | ALA | A | 235 | 76.926 | 91.676 | -86.610 | 1.00 | 35.61  | A | O |
| ATOM | 466 | N   | CYS | A | 236 | 78.127 | 92.876 | -88.089 | 1.00 | 41.29  | A | N |
| ATOM | 467 | CA  | CYS | A | 236 | 78.963 | 93.502 | -87.071 | 1.00 | 41.29  | A | C |
| ATOM | 468 | CB  | CYS | A | 236 | 80.147 | 94.224 | -87.718 | 1.00 | 41.29  | A | C |
| ATOM | 469 | SG  | CYS | A | 236 | 81.264 | 93.146 | -88.646 | 1.00 | 41.29  | A | S |
| ATOM | 470 | C   | CYS | A | 236 | 78.157 | 94.476 | -86.219 | 1.00 | 41.29  | A | C |
| ATOM | 471 | O   | CYS | A | 236 | 78.242 | 94.456 | -84.991 | 1.00 | 41.29  | A | O |
| ATOM | 472 | N   | VAL | A | 237 | 77.376 | 95.326 | -86.878 | 1.00 | 109.38 | A | N |
| ATOM | 473 | CA  | VAL | A | 237 | 76.544 | 96.300 | -86.181 | 1.00 | 109.38 | A | C |
| ATOM | 474 | CB  | VAL | A | 237 | 75.826 | 97.240 | -87.169 | 1.00 | 109.38 | A | C |
| ATOM | 475 | CG1 | VAL | A | 237 | 74.895 | 98.185 | -86.425 | 1.00 | 109.38 | A | C |
| ATOM | 476 | CG2 | VAL | A | 237 | 76.840 | 98.021 | -87.990 | 1.00 | 109.38 | A | C |
| ATOM | 477 | C   | VAL | A | 237 | 75.510 | 95.605 | -85.302 | 1.00 | 109.38 | A | C |
| ATOM | 478 | O   | VAL | A | 237 | 75.183 | 96.083 | -84.216 | 1.00 | 109.38 | A | O |
| ATOM | 479 | N   | MET | A | 238 | 75.001 | 94.473 | -85.779 | 1.00 | 141.41 | A | N |
| ATOM | 480 | CA  | MET | A | 238 | 74.018 | 93.698 | -85.032 | 1.00 | 141.41 | A | C |
| ATOM | 481 | CB  | MET | A | 238 | 73.603 | 92.456 | -85.825 | 1.00 | 141.41 | A | C |
| ATOM | 482 | CG  | MET | A | 238 | 72.463 | 91.656 | -85.207 | 1.00 | 141.41 | A | C |
| ATOM | 483 | SD  | MET | A | 238 | 72.958 | 90.663 | -83.785 | 1.00 | 141.41 | A | S |
| ATOM | 484 | CE  | MET | A | 238 | 71.405 | 89.876 | -83.365 | 1.00 | 141.41 | A | C |
| ATOM | 485 | C   | MET | A | 238 | 74.576 | 93.297 | -83.671 | 1.00 | 141.41 | A | C |
| ATOM | 486 | O   | MET | A | 238 | 73.938 | 93.511 | -82.640 | 1.00 | 141.41 | A | O |
| ATOM | 487 | N   | ILE | A | 239 | 75.772 | 92.717 | -83.676 | 1.00 | 163.25 | A | N |
| ATOM | 488 | CA  | ILE | A | 239 | 76.426 | 92.296 | -82.444 | 1.00 | 163.25 | A | C |
| ATOM | 489 | CB  | ILE | A | 239 | 77.749 | 91.562 | -82.730 | 1.00 | 163.25 | A | C |
| ATOM | 490 | CG2 | ILE | A | 239 | 78.410 | 91.126 | -81.431 | 1.00 | 163.25 | A | C |
| ATOM | 491 | CG1 | ILE | A | 239 | 77.505 | 90.359 | -83.642 | 1.00 | 163.25 | A | C |
| ATOM | 492 | CD1 | ILE | A | 239 | 76.554 | 89.335 | -83.062 | 1.00 | 163.25 | A | C |
| ATOM | 493 | C   | ILE | A | 239 | 76.703 | 93.490 | -81.537 | 1.00 | 163.25 | A | C |
| ATOM | 494 | O   | ILE | A | 239 | 76.501 | 93.423 | -80.325 | 1.00 | 163.25 | A | O |
| ATOM | 495 | N   | PHE | A | 240 | 77.166 | 94.584 | -82.134 | 1.00 | 70.90  | A | N |
| ATOM | 496 | CA  | PHE | A | 240 | 77.475 | 95.795 | -81.384 | 1.00 | 70.90  | A | C |
| ATOM | 497 | CB  | PHE | A | 240 | 78.139 | 96.833 | -82.292 | 1.00 | 70.90  | A | C |
| ATOM | 498 | CG  | PHE | A | 240 | 79.438 | 96.373 | -82.891 | 1.00 | 70.90  | A | C |
| ATOM | 499 | CD1 | PHE | A | 240 | 80.174 | 95.364 | -82.293 | 1.00 | 70.90  | A | C |
| ATOM | 500 | CD2 | PHE | A | 240 | 79.923 | 96.949 | -84.054 | 1.00 | 70.90  | A | C |
| ATOM | 501 | CE1 | PHE | A | 240 | 81.369 | 94.938 | -82.842 | 1.00 | 70.90  | A | C |
| ATOM | 502 | CE2 | PHE | A | 240 | 81.117 | 96.528 | -84.608 | 1.00 | 70.90  | A | C |
| ATOM | 503 | CZ  | PHE | A | 240 | 81.841 | 95.521 | -84.001 | 1.00 | 70.90  | A | C |
| ATOM | 504 | C   | PHE | A | 240 | 76.222 | 96.383 | -80.742 | 1.00 | 70.90  | A | C |
| ATOM | 505 | O   | PHE | A | 240 | 76.275 | 96.924 | -79.638 | 1.00 | 70.90  | A | O |
| ATOM | 506 | N   | THR | A | 241 | 75.097 | 96.272 | -81.442 | 1.00 | 101.68 | A | N |
| ATOM | 507 | CA  | THR | A | 241 | 73.830 | 96.791 | -80.942 | 1.00 | 101.68 | A | C |
| ATOM | 508 | CB  | THR | A | 241 | 72.753 | 96.809 | -82.042 | 1.00 | 101.68 | A | C |
| ATOM | 509 | OG1 | THR | A | 241 | 73.174 | 97.665 | -83.112 | 1.00 | 101.68 | A | O |
| ATOM | 510 | CG2 | THR | A | 241 | 71.430 | 97.315 | -81.486 | 1.00 | 101.68 | A | C |
| ATOM | 511 | C   | THR | A | 241 | 73.326 | 95.969 | -79.761 | 1.00 | 101.68 | A | C |
| ATOM | 512 | O   | THR | A | 241 | 72.876 | 96.520 | -78.756 | 1.00 | 101.68 | A | O |
| ATOM | 513 | N   | VAL | A | 242 | 73.404 | 94.648 | -79.888 | 1.00 | 32.84  | A | N |
| ATOM | 514 | CA  | VAL | A | 242 | 72.968 | 93.748 | -78.827 | 1.00 | 32.84  | A | C |
| ATOM | 515 | CB  | VAL | A | 242 | 73.150 | 92.271 | -79.225 | 1.00 | 32.84  | A | C |
| ATOM | 516 | CG1 | VAL | A | 242 | 72.798 | 91.360 | -78.059 | 1.00 | 32.84  | A | C |

|      |     |     |     |   |     |        |         |         |      |        |   |   |
|------|-----|-----|-----|---|-----|--------|---------|---------|------|--------|---|---|
| ATOM | 517 | CG2 | VAL | A | 242 | 72.299 | 91.942  | -80.441 | 1.00 | 32.84  | A | C |
| ATOM | 518 | C   | VAL | A | 242 | 73.728 | 94.020  | -77.533 | 1.00 | 32.84  | A | C |
| ATOM | 519 | O   | VAL | A | 242 | 73.142 | 94.040  | -76.450 | 1.00 | 32.84  | A | O |
| ATOM | 520 | N   | GLU | A | 243 | 75.034 | 94.231  | -77.653 | 1.00 | 57.64  | A | N |
| ATOM | 521 | CA  | GLU | A | 243 | 75.870 | 94.528  | -76.496 | 1.00 | 57.64  | A | C |
| ATOM | 522 | CB  | GLU | A | 243 | 77.336 | 94.657  | -76.911 | 1.00 | 57.64  | A | C |
| ATOM | 523 | CG  | GLU | A | 243 | 77.920 | 93.398  | -77.529 | 1.00 | 57.64  | A | C |
| ATOM | 524 | CD  | GLU | A | 243 | 79.367 | 93.571  | -77.947 | 1.00 | 57.64  | A | C |
| ATOM | 525 | OE1 | GLU | A | 243 | 79.917 | 92.648  | -78.583 | 1.00 | 57.64  | A | O |
| ATOM | 526 | OE2 | GLU | A | 243 | 79.954 | 94.629  | -77.638 | 1.00 | 57.64  | A | O |
| ATOM | 527 | C   | GLU | A | 243 | 75.408 | 95.807  | -75.806 | 1.00 | 57.64  | A | C |
| ATOM | 528 | O   | GLU | A | 243 | 75.419 | 95.903  | -74.579 | 1.00 | 57.64  | A | O |
| ATOM | 529 | N   | TYR | A | 244 | 75.001 | 96.787  | -76.606 | 1.00 | 53.95  | A | N |
| ATOM | 530 | CA  | TYR | A | 244 | 74.521 | 98.058  | -76.079 | 1.00 | 53.95  | A | C |
| ATOM | 531 | CB  | TYR | A | 244 | 74.374 | 99.084  | -77.205 | 1.00 | 53.95  | A | C |
| ATOM | 532 | CG  | TYR | A | 244 | 73.717 | 100.377 | -76.775 | 1.00 | 53.95  | A | C |
| ATOM | 533 | CD1 | TYR | A | 244 | 74.453 | 101.383 | -76.165 | 1.00 | 53.95  | A | C |
| ATOM | 534 | CD2 | TYR | A | 244 | 72.361 | 100.591 | -76.982 | 1.00 | 53.95  | A | C |
| ATOM | 535 | CE1 | TYR | A | 244 | 73.856 | 102.566 | -75.771 | 1.00 | 53.95  | A | C |
| ATOM | 536 | CE2 | TYR | A | 244 | 71.756 | 101.771 | -76.592 | 1.00 | 53.95  | A | C |
| ATOM | 537 | CZ  | TYR | A | 244 | 72.508 | 102.754 | -75.987 | 1.00 | 53.95  | A | C |
| ATOM | 538 | OH  | TYR | A | 244 | 71.910 | 103.931 | -75.597 | 1.00 | 53.95  | A | O |
| ATOM | 539 | C   | TYR | A | 244 | 73.193 | 97.890  | -75.347 | 1.00 | 53.95  | A | C |
| ATOM | 540 | O   | TYR | A | 244 | 72.968 | 98.501  | -74.303 | 1.00 | 53.95  | A | O |
| ATOM | 541 | N   | LEU | A | 245 | 72.319 | 97.056  | -75.901 | 1.00 | 44.50  | A | N |
| ATOM | 542 | CA  | LEU | A | 245 | 71.003 | 96.826  | -75.316 | 1.00 | 44.50  | A | C |
| ATOM | 543 | CB  | LEU | A | 245 | 70.090 | 96.114  | -76.316 | 1.00 | 44.50  | A | C |
| ATOM | 544 | CG  | LEU | A | 245 | 69.815 | 96.854  | -77.626 | 1.00 | 44.50  | A | C |
| ATOM | 545 | CD1 | LEU | A | 245 | 68.965 | 96.002  | -78.557 | 1.00 | 44.50  | A | C |
| ATOM | 546 | CD2 | LEU | A | 245 | 69.144 | 98.192  | -77.357 | 1.00 | 44.50  | A | C |
| ATOM | 547 | C   | LEU | A | 245 | 71.093 | 96.020  | -74.023 | 1.00 | 44.50  | A | C |
| ATOM | 548 | O   | LEU | A | 245 | 70.370 | 96.287  | -73.063 | 1.00 | 44.50  | A | O |
| ATOM | 549 | N   | LEU | A | 246 | 71.985 | 95.035  | -74.005 | 1.00 | 93.07  | A | N |
| ATOM | 550 | CA  | LEU | A | 246 | 72.156 | 94.179  | -72.837 | 1.00 | 93.07  | A | C |
| ATOM | 551 | CB  | LEU | A | 246 | 73.011 | 92.957  | -73.183 | 1.00 | 93.07  | A | C |
| ATOM | 552 | CG  | LEU | A | 246 | 72.415 | 91.982  | -74.201 | 1.00 | 93.07  | A | C |
| ATOM | 553 | CD1 | LEU | A | 246 | 73.390 | 90.853  | -74.497 | 1.00 | 93.07  | A | C |
| ATOM | 554 | CD2 | LEU | A | 246 | 71.087 | 91.433  | -73.704 | 1.00 | 93.07  | A | C |
| ATOM | 555 | C   | LEU | A | 246 | 72.770 | 94.937  | -71.665 | 1.00 | 93.07  | A | C |
| ATOM | 556 | O   | LEU | A | 246 | 72.249 | 94.896  | -70.551 | 1.00 | 93.07  | A | O |
| ATOM | 557 | N   | ARG | A | 247 | 73.877 | 95.627  | -71.920 | 1.00 | 110.03 | A | N |
| ATOM | 558 | CA  | ARG | A | 247 | 74.560 | 96.385  | -70.878 | 1.00 | 110.03 | A | C |
| ATOM | 559 | CB  | ARG | A | 247 | 75.902 | 96.921  | -71.384 | 1.00 | 110.03 | A | C |
| ATOM | 560 | CG  | ARG | A | 247 | 76.925 | 95.844  | -71.706 | 1.00 | 110.03 | A | C |
| ATOM | 561 | CD  | ARG | A | 247 | 78.299 | 96.450  | -71.948 | 1.00 | 110.03 | A | C |
| ATOM | 562 | NE  | ARG | A | 247 | 79.306 | 95.436  | -72.249 | 1.00 | 110.03 | A | N |
| ATOM | 563 | CZ  | ARG | A | 247 | 79.698 | 95.112  | -73.477 | 1.00 | 110.03 | A | C |
| ATOM | 564 | NH1 | ARG | A | 247 | 79.170 | 95.727  | -74.526 | 1.00 | 110.03 | A | N |
| ATOM | 565 | NH2 | ARG | A | 247 | 80.620 | 94.177  | -73.656 | 1.00 | 110.03 | A | N |
| ATOM | 566 | C   | ARG | A | 247 | 73.697 | 97.533  | -70.360 | 1.00 | 110.03 | A | C |
| ATOM | 567 | O   | ARG | A | 247 | 73.866 | 97.986  | -69.228 | 1.00 | 110.03 | A | O |
| ATOM | 568 | N   | LEU | A | 248 | 72.775 | 98.000  | -71.195 | 1.00 | 148.40 | A | N |
| ATOM | 569 | CA  | LEU | A | 248 | 71.886 | 99.093  | -70.818 | 1.00 | 148.40 | A | C |
| ATOM | 570 | CB  | LEU | A | 248 | 71.199 | 99.676  | -72.055 | 1.00 | 148.40 | A | C |
| ATOM | 571 | CG  | LEU | A | 248 | 70.285 | 100.881 | -71.825 | 1.00 | 148.40 | A | C |
| ATOM | 572 | CD1 | LEU | A | 248 | 71.054 | 102.020 | -71.176 | 1.00 | 148.40 | A | C |
| ATOM | 573 | CD2 | LEU | A | 248 | 69.651 | 101.333 | -73.131 | 1.00 | 148.40 | A | C |
| ATOM | 574 | C   | LEU | A | 248 | 70.841 | 98.628  | -69.809 | 1.00 | 148.40 | A | C |
| ATOM | 575 | O   | LEU | A | 248 | 70.353 | 99.415  | -68.999 | 1.00 | 148.40 | A | O |
| ATOM | 576 | N   | ALA | A | 249 | 70.505 | 97.343  | -69.864 | 1.00 | 46.03  | A | N |
| ATOM | 577 | CA  | ALA | A | 249 | 69.514 | 96.772  | -68.959 | 1.00 | 46.03  | A | C |
| ATOM | 578 | CB  | ALA | A | 249 | 68.549 | 95.880  | -69.726 | 1.00 | 46.03  | A | C |
| ATOM | 579 | C   | ALA | A | 249 | 70.177 | 95.994  | -67.828 | 1.00 | 46.03  | A | C |
| ATOM | 580 | O   | ALA | A | 249 | 69.526 | 95.624  | -66.851 | 1.00 | 46.03  | A | O |
| ATOM | 581 | N   | ALA | A | 250 | 71.476 | 95.748  | -67.967 | 1.00 | 55.13  | A | N |
| ATOM | 582 | CA  | ALA | A | 250 | 72.230 | 95.018  | -66.955 | 1.00 | 55.13  | A | C |
| ATOM | 583 | CB  | ALA | A | 250 | 73.229 | 94.078  | -67.613 | 1.00 | 55.13  | A | C |
| ATOM | 584 | C   | ALA | A | 250 | 72.943 | 95.975  | -66.006 | 1.00 | 55.13  | A | C |

|      |     |     |     |   |     |        |         |         |      |        |   |   |
|------|-----|-----|-----|---|-----|--------|---------|---------|------|--------|---|---|
| ATOM | 585 | O   | ALA | A | 250 | 73.382 | 95.580  | -64.926 | 1.00 | 55.13  | A | O |
| ATOM | 586 | N   | ALA | A | 251 | 73.054 | 97.234  | -66.416 | 1.00 | 67.05  | A | N |
| ATOM | 587 | CA  | ALA | A | 251 | 73.708 | 98.250  | -65.601 | 1.00 | 67.05  | A | C |
| ATOM | 588 | CB  | ALA | A | 251 | 74.021 | 99.481  | -66.436 | 1.00 | 67.05  | A | C |
| ATOM | 589 | C   | ALA | A | 251 | 72.850 | 98.625  | -64.397 | 1.00 | 67.05  | A | C |
| ATOM | 590 | O   | ALA | A | 251 | 71.705 | 99.048  | -64.554 | 1.00 | 67.05  | A | O |
| ATOM | 591 | N   | PRO | A | 252 | 73.408 | 98.467  | -63.188 | 1.00 | 163.88 | A | N |
| ATOM | 592 | CA  | PRO | A | 252 | 72.715 | 98.795  | -61.937 | 1.00 | 163.88 | A | C |
| ATOM | 593 | CD  | PRO | A | 252 | 74.754 | 97.921  | -62.946 | 1.00 | 163.88 | A | C |
| ATOM | 594 | CB  | PRO | A | 252 | 73.804 | 98.605  | -60.879 | 1.00 | 163.88 | A | C |
| ATOM | 595 | CG  | PRO | A | 252 | 74.736 | 97.612  | -61.478 | 1.00 | 163.88 | A | C |
| ATOM | 596 | C   | PRO | A | 252 | 72.220 | 100.238 | -61.925 | 1.00 | 163.88 | A | C |
| ATOM | 597 | O   | PRO | A | 252 | 71.236 | 100.547 | -61.252 | 1.00 | 163.88 | A | O |
| ATOM | 598 | N   | SER | A | 253 | 72.901 | 101.108 | -62.663 | 1.00 | 124.25 | A | N |
| ATOM | 599 | CA  | SER | A | 253 | 72.523 | 102.515 | -62.734 | 1.00 | 124.25 | A | C |
| ATOM | 600 | CB  | SER | A | 253 | 73.636 | 103.397 | -62.164 | 1.00 | 124.25 | A | C |
| ATOM | 601 | OG  | SER | A | 253 | 73.284 | 104.768 | -62.225 | 1.00 | 124.25 | A | O |
| ATOM | 602 | C   | SER | A | 253 | 72.207 | 102.931 | -64.166 | 1.00 | 124.25 | A | C |
| ATOM | 603 | O   | SER | A | 253 | 72.907 | 102.548 | -65.103 | 1.00 | 124.25 | A | O |
| ATOM | 604 | N   | ARG | A | 254 | 71.148 | 103.718 | -64.328 | 1.00 | 172.72 | A | N |
| ATOM | 605 | CA  | ARG | A | 254 | 70.740 | 104.192 | -65.645 | 1.00 | 172.72 | A | C |
| ATOM | 606 | CB  | ARG | A | 254 | 69.236 | 103.997 | -65.843 | 1.00 | 172.72 | A | C |
| ATOM | 607 | CG  | ARG | A | 254 | 68.790 | 102.545 | -65.824 | 1.00 | 172.72 | A | C |
| ATOM | 608 | CD  | ARG | A | 254 | 69.441 | 101.755 | -66.947 | 1.00 | 172.72 | A | C |
| ATOM | 609 | NE  | ARG | A | 254 | 69.109 | 102.299 | -68.260 | 1.00 | 172.72 | A | N |
| ATOM | 610 | CZ  | ARG | A | 254 | 68.057 | 101.923 | -68.980 | 1.00 | 172.72 | A | C |
| ATOM | 611 | NH1 | ARG | A | 254 | 67.229 | 100.998 | -68.516 | 1.00 | 172.72 | A | N |
| ATOM | 612 | NH2 | ARG | A | 254 | 67.832 | 102.473 | -70.166 | 1.00 | 172.72 | A | N |
| ATOM | 613 | C   | ARG | A | 254 | 71.109 | 105.658 | -65.845 | 1.00 | 172.72 | A | C |
| ATOM | 614 | O   | ARG | A | 254 | 70.895 | 106.220 | -66.919 | 1.00 | 172.72 | A | O |
| ATOM | 615 | N   | TYR | A | 255 | 71.661 | 106.273 | -64.804 | 1.00 | 99.39  | A | N |
| ATOM | 616 | CA  | TYR | A | 255 | 72.063 | 107.673 | -64.868 | 1.00 | 99.39  | A | C |
| ATOM | 617 | CB  | TYR | A | 255 | 71.622 | 108.417 | -63.606 | 1.00 | 99.39  | A | C |
| ATOM | 618 | CG  | TYR | A | 255 | 71.860 | 109.910 | -63.658 | 1.00 | 99.39  | A | C |
| ATOM | 619 | CD1 | TYR | A | 255 | 70.920 | 110.763 | -64.220 | 1.00 | 99.39  | A | C |
| ATOM | 620 | CD2 | TYR | A | 255 | 73.024 | 110.466 | -63.144 | 1.00 | 99.39  | A | C |
| ATOM | 621 | CE1 | TYR | A | 255 | 71.132 | 112.127 | -64.270 | 1.00 | 99.39  | A | C |
| ATOM | 622 | CE2 | TYR | A | 255 | 73.245 | 111.829 | -63.190 | 1.00 | 99.39  | A | C |
| ATOM | 623 | CZ  | TYR | A | 255 | 72.296 | 112.655 | -63.753 | 1.00 | 99.39  | A | C |
| ATOM | 624 | OH  | TYR | A | 255 | 72.511 | 114.013 | -63.801 | 1.00 | 99.39  | A | O |
| ATOM | 625 | C   | TYR | A | 255 | 73.571 | 107.798 | -65.057 | 1.00 | 99.39  | A | C |
| ATOM | 626 | O   | TYR | A | 255 | 74.060 | 108.795 | -65.589 | 1.00 | 99.39  | A | O |
| ATOM | 627 | N   | ARG | A | 256 | 74.304 | 106.779 | -64.619 | 1.00 | 167.77 | A | N |
| ATOM | 628 | CA  | ARG | A | 256 | 75.755 | 106.764 | -64.753 | 1.00 | 167.77 | A | C |
| ATOM | 629 | CB  | ARG | A | 256 | 76.398 | 106.093 | -63.537 | 1.00 | 167.77 | A | C |
| ATOM | 630 | CG  | ARG | A | 256 | 76.142 | 106.810 | -62.222 | 1.00 | 167.77 | A | C |
| ATOM | 631 | CD  | ARG | A | 256 | 76.779 | 106.068 | -61.059 | 1.00 | 167.77 | A | C |
| ATOM | 632 | NE  | ARG | A | 256 | 78.214 | 105.875 | -61.253 | 1.00 | 167.77 | A | N |
| ATOM | 633 | CZ  | ARG | A | 256 | 79.145 | 106.732 | -60.848 | 1.00 | 167.77 | A | C |
| ATOM | 634 | NH1 | ARG | A | 256 | 78.796 | 107.847 | -60.222 | 1.00 | 167.77 | A | N |
| ATOM | 635 | NH2 | ARG | A | 256 | 80.427 | 106.474 | -61.068 | 1.00 | 167.77 | A | N |
| ATOM | 636 | C   | ARG | A | 256 | 76.184 | 106.050 | -66.030 | 1.00 | 167.77 | A | C |
| ATOM | 637 | O   | ARG | A | 256 | 77.375 | 105.858 | -66.277 | 1.00 | 167.77 | A | O |
| ATOM | 638 | N   | PHE | A | 257 | 75.204 | 105.658 | -66.839 | 1.00 | 86.55  | A | N |
| ATOM | 639 | CA  | PHE | A | 257 | 75.476 | 104.955 | -68.087 | 1.00 | 86.55  | A | C |
| ATOM | 640 | CB  | PHE | A | 257 | 74.209 | 104.265 | -68.600 | 1.00 | 86.55  | A | C |
| ATOM | 641 | CG  | PHE | A | 257 | 74.397 | 103.543 | -69.903 | 1.00 | 86.55  | A | C |
| ATOM | 642 | CD1 | PHE | A | 257 | 74.874 | 102.243 | -69.928 | 1.00 | 86.55  | A | C |
| ATOM | 643 | CD2 | PHE | A | 257 | 74.096 | 104.164 | -71.104 | 1.00 | 86.55  | A | C |
| ATOM | 644 | CE1 | PHE | A | 257 | 75.047 | 101.575 | -71.126 | 1.00 | 86.55  | A | C |
| ATOM | 645 | CE2 | PHE | A | 257 | 74.267 | 103.502 | -72.306 | 1.00 | 86.55  | A | C |
| ATOM | 646 | CZ  | PHE | A | 257 | 74.743 | 102.206 | -72.317 | 1.00 | 86.55  | A | C |
| ATOM | 647 | C   | PHE | A | 257 | 76.024 | 105.900 | -69.151 | 1.00 | 86.55  | A | C |
| ATOM | 648 | O   | PHE | A | 257 | 77.028 | 105.606 | -69.799 | 1.00 | 86.55  | A | O |
| ATOM | 649 | N   | VAL | A | 258 | 75.359 | 107.038 | -69.323 | 1.00 | 126.69 | A | N |
| ATOM | 650 | CA  | VAL | A | 258 | 75.765 | 108.018 | -70.324 | 1.00 | 126.69 | A | C |
| ATOM | 651 | CB  | VAL | A | 258 | 74.624 | 109.001 | -70.645 | 1.00 | 126.69 | A | C |
| ATOM | 652 | CG1 | VAL | A | 258 | 73.442 | 108.260 | -71.252 | 1.00 | 126.69 | A | C |

|      |     |     |     |   |     |        |         |         |      |        |   |   |
|------|-----|-----|-----|---|-----|--------|---------|---------|------|--------|---|---|
| ATOM | 653 | CG2 | VAL | A | 258 | 74.206 | 109.755 | -69.392 | 1.00 | 126.69 | A | C |
| ATOM | 654 | C   | VAL | A | 258 | 76.990 | 108.808 | -69.873 | 1.00 | 126.69 | A | C |
| ATOM | 655 | O   | VAL | A | 258 | 77.496 | 109.657 | -70.607 | 1.00 | 126.69 | A | O |
| ATOM | 656 | N   | ARG | A | 259 | 77.462 | 108.524 | -68.663 | 1.00 | 166.93 | A | N |
| ATOM | 657 | CA  | ARG | A | 259 | 78.627 | 109.211 | -68.117 | 1.00 | 166.93 | A | C |
| ATOM | 658 | CB  | ARG | A | 259 | 78.503 | 109.353 | -66.599 | 1.00 | 166.93 | A | C |
| ATOM | 659 | CG  | ARG | A | 259 | 79.647 | 110.119 | -65.953 | 1.00 | 166.93 | A | C |
| ATOM | 660 | CD  | ARG | A | 259 | 79.472 | 110.209 | -64.447 | 1.00 | 166.93 | A | C |
| ATOM | 661 | NE  | ARG | A | 259 | 80.534 | 110.990 | -63.819 | 1.00 | 166.93 | A | N |
| ATOM | 662 | CZ  | ARG | A | 259 | 81.681 | 110.478 | -63.386 | 1.00 | 166.93 | A | C |
| ATOM | 663 | NH1 | ARG | A | 259 | 81.920 | 109.180 | -63.511 | 1.00 | 166.93 | A | N |
| ATOM | 664 | NH2 | ARG | A | 259 | 82.591 | 111.264 | -62.827 | 1.00 | 166.93 | A | N |
| ATOM | 665 | C   | ARG | A | 259 | 79.918 | 108.481 | -68.472 | 1.00 | 166.93 | A | C |
| ATOM | 666 | O   | ARG | A | 259 | 80.959 | 109.107 | -68.676 | 1.00 | 166.93 | A | O |
| ATOM | 667 | N   | SER | A | 260 | 79.845 | 107.156 | -68.542 | 1.00 | 90.97  | A | N |
| ATOM | 668 | CA  | SER | A | 260 | 81.010 | 106.341 | -68.865 | 1.00 | 90.97  | A | C |
| ATOM | 669 | CB  | SER | A | 260 | 80.679 | 104.853 | -68.726 | 1.00 | 90.97  | A | C |
| ATOM | 670 | OG  | SER | A | 260 | 80.276 | 104.541 | -67.404 | 1.00 | 90.97  | A | O |
| ATOM | 671 | C   | SER | A | 260 | 81.521 | 106.636 | -70.271 | 1.00 | 90.97  | A | C |
| ATOM | 672 | O   | SER | A | 260 | 80.743 | 106.954 | -71.170 | 1.00 | 90.97  | A | O |
| ATOM | 673 | N   | VAL | A | 261 | 82.833 | 106.530 | -70.454 | 1.00 | 94.76  | A | N |
| ATOM | 674 | CA  | VAL | A | 261 | 83.450 | 106.794 | -71.749 | 1.00 | 94.76  | A | C |
| ATOM | 675 | CB  | VAL | A | 261 | 84.909 | 107.267 | -71.595 | 1.00 | 94.76  | A | C |
| ATOM | 676 | CG1 | VAL | A | 261 | 84.960 | 108.607 | -70.878 | 1.00 | 94.76  | A | C |
| ATOM | 677 | CG2 | VAL | A | 261 | 85.732 | 106.225 | -70.852 | 1.00 | 94.76  | A | C |
| ATOM | 678 | C   | VAL | A | 261 | 83.415 | 105.561 | -72.646 | 1.00 | 94.76  | A | C |
| ATOM | 679 | O   | VAL | A | 261 | 83.461 | 105.673 | -73.871 | 1.00 | 94.76  | A | O |
| ATOM | 680 | N   | MET | A | 262 | 83.334 | 104.386 | -72.030 | 1.00 | 60.02  | A | N |
| ATOM | 681 | CA  | MET | A | 262 | 83.288 | 103.133 | -72.775 | 1.00 | 60.02  | A | C |
| ATOM | 682 | CB  | MET | A | 262 | 83.579 | 101.948 | -71.852 | 1.00 | 60.02  | A | C |
| ATOM | 683 | CG  | MET | A | 262 | 84.964 | 101.976 | -71.224 | 1.00 | 60.02  | A | C |
| ATOM | 684 | SD  | MET | A | 262 | 86.281 | 101.976 | -72.454 | 1.00 | 60.02  | A | S |
| ATOM | 685 | CE  | MET | A | 262 | 87.730 | 101.994 | -71.401 | 1.00 | 60.02  | A | C |
| ATOM | 686 | C   | MET | A | 262 | 81.937 | 102.949 | -73.457 | 1.00 | 60.02  | A | C |
| ATOM | 687 | O   | MET | A | 262 | 81.854 | 102.389 | -74.550 | 1.00 | 60.02  | A | O |
| ATOM | 688 | N   | SER | A | 263 | 80.882 | 103.423 | -72.804 | 1.00 | 83.90  | A | N |
| ATOM | 689 | CA  | SER | A | 263 | 79.533 | 103.317 | -73.345 | 1.00 | 83.90  | A | C |
| ATOM | 690 | CB  | SER | A | 263 | 78.500 | 103.693 | -72.282 | 1.00 | 83.90  | A | C |
| ATOM | 691 | OG  | SER | A | 263 | 78.679 | 105.030 | -71.849 | 1.00 | 83.90  | A | O |
| ATOM | 692 | C   | SER | A | 263 | 79.362 | 104.206 | -74.573 | 1.00 | 83.90  | A | C |
| ATOM | 693 | O   | SER | A | 263 | 78.716 | 103.818 | -75.546 | 1.00 | 83.90  | A | O |
| ATOM | 694 | N   | ILE | A | 264 | 79.944 | 105.399 | -74.518 | 1.00 | 88.68  | A | N |
| ATOM | 695 | CA  | ILE | A | 264 | 79.864 | 106.345 | -75.624 | 1.00 | 88.68  | A | C |
| ATOM | 696 | CB  | ILE | A | 264 | 80.595 | 107.661 | -75.295 | 1.00 | 88.68  | A | C |
| ATOM | 697 | CG2 | ILE | A | 264 | 80.489 | 108.637 | -76.457 | 1.00 | 88.68  | A | C |
| ATOM | 698 | CG1 | ILE | A | 264 | 80.029 | 108.280 | -74.016 | 1.00 | 88.68  | A | C |
| ATOM | 699 | CD1 | ILE | A | 264 | 78.557 | 108.622 | -74.102 | 1.00 | 88.68  | A | C |
| ATOM | 700 | C   | ILE | A | 264 | 80.455 | 105.751 | -76.898 | 1.00 | 88.68  | A | C |
| ATOM | 701 | O   | ILE | A | 264 | 79.896 | 105.905 | -77.984 | 1.00 | 88.68  | A | O |
| ATOM | 702 | N   | ILE | A | 265 | 81.588 | 105.072 | -76.756 | 1.00 | 113.98 | A | N |
| ATOM | 703 | CA  | ILE | A | 265 | 82.252 | 104.440 | -77.891 | 1.00 | 113.98 | A | C |
| ATOM | 704 | CB  | ILE | A | 265 | 83.587 | 103.795 | -77.474 | 1.00 | 113.98 | A | C |
| ATOM | 705 | CG2 | ILE | A | 265 | 84.271 | 103.158 | -78.675 | 1.00 | 113.98 | A | C |
| ATOM | 706 | CG1 | ILE | A | 265 | 84.501 | 104.834 | -76.822 | 1.00 | 113.98 | A | C |
| ATOM | 707 | CD1 | ILE | A | 265 | 85.839 | 104.282 | -76.382 | 1.00 | 113.98 | A | C |
| ATOM | 708 | C   | ILE | A | 265 | 81.357 | 103.379 | -78.523 | 1.00 | 113.98 | A | C |
| ATOM | 709 | O   | ILE | A | 265 | 81.328 | 103.224 | -79.744 | 1.00 | 113.98 | A | O |
| ATOM | 710 | N   | ASP | A | 266 | 80.626 | 102.653 | -77.684 | 1.00 | 68.21  | A | N |
| ATOM | 711 | CA  | ASP | A | 266 | 79.717 | 101.617 | -78.160 | 1.00 | 68.21  | A | C |
| ATOM | 712 | CB  | ASP | A | 266 | 79.204 | 100.775 | -76.990 | 1.00 | 68.21  | A | C |
| ATOM | 713 | CG  | ASP | A | 266 | 80.325 | 100.098 | -76.225 | 1.00 | 68.21  | A | C |
| ATOM | 714 | OD1 | ASP | A | 266 | 81.361 | 99.778  | -76.845 | 1.00 | 68.21  | A | O |
| ATOM | 715 | OD2 | ASP | A | 266 | 80.169 | 99.884  | -75.004 | 1.00 | 68.21  | A | O |
| ATOM | 716 | C   | ASP | A | 266 | 78.545 | 102.226 | -78.922 | 1.00 | 68.21  | A | C |
| ATOM | 717 | O   | ASP | A | 266 | 77.959 | 101.586 | -79.794 | 1.00 | 68.21  | A | O |
| ATOM | 718 | N   | VAL | A | 267 | 78.208 | 103.467 | -78.585 | 1.00 | 104.56 | A | N |
| ATOM | 719 | CA  | VAL | A | 267 | 77.109 | 104.168 | -79.239 | 1.00 | 104.56 | A | C |
| ATOM | 720 | CB  | VAL | A | 267 | 76.612 | 105.355 | -78.393 | 1.00 | 104.56 | A | C |

|      |     |     |     |   |     |        |         |         |            |   |   |
|------|-----|-----|-----|---|-----|--------|---------|---------|------------|---|---|
| ATOM | 721 | CG1 | VAL | A | 267 | 75.514 | 106.108 | -79.127 | 1.00104.56 | A | C |
| ATOM | 722 | CG2 | VAL | A | 267 | 76.121 | 104.871 | -77.038 | 1.00104.56 | A | C |
| ATOM | 723 | C   | VAL | A | 267 | 77.521 | 104.677 | -80.617 | 1.00104.56 | A | C |
| ATOM | 724 | O   | VAL | A | 267 | 76.847 | 104.418 | -81.612 | 1.00104.56 | A | O |
| ATOM | 725 | N   | VAL | A | 268 | 78.636 | 105.400 | -80.665 | 1.00100.82 | A | N |
| ATOM | 726 | CA  | VAL | A | 268 | 79.135 | 105.966 | -81.913 | 1.00100.82 | A | C |
| ATOM | 727 | CB  | VAL | A | 268 | 80.368 | 106.860 | -81.666 | 1.00100.82 | A | C |
| ATOM | 728 | CG1 | VAL | A | 268 | 80.801 | 107.542 | -82.955 | 1.00100.82 | A | C |
| ATOM | 729 | CG2 | VAL | A | 268 | 80.066 | 107.892 | -80.592 | 1.00100.82 | A | C |
| ATOM | 730 | C   | VAL | A | 268 | 79.495 | 104.870 | -82.914 | 1.00100.82 | A | C |
| ATOM | 731 | O   | VAL | A | 268 | 79.607 | 105.121 | -84.113 | 1.00100.82 | A | O |
| ATOM | 732 | N   | ALA | A | 269 | 79.667 | 103.651 | -82.413 | 1.00 69.40 | A | N |
| ATOM | 733 | CA  | ALA | A | 269 | 80.043 | 102.523 | -83.258 | 1.00 69.40 | A | C |
| ATOM | 734 | CB  | ALA | A | 269 | 80.683 | 101.425 | -82.420 | 1.00 69.40 | A | C |
| ATOM | 735 | C   | ALA | A | 269 | 78.856 | 101.971 | -84.044 | 1.00 69.40 | A | C |
| ATOM | 736 | O   | ALA | A | 269 | 79.014 | 101.072 | -84.869 | 1.00 69.40 | A | O |
| ATOM | 737 | N   | ILE | A | 270 | 77.668 | 102.512 | -83.786 | 1.00105.76 | A | N |
| ATOM | 738 | CA  | ILE | A | 270 | 76.459 | 102.049 | -84.461 | 1.00105.76 | A | C |
| ATOM | 739 | CB  | ILE | A | 270 | 75.597 | 101.164 | -83.538 | 1.00105.76 | A | C |
| ATOM | 740 | CG2 | ILE | A | 270 | 76.381 | 99.944  | -83.080 | 1.00105.76 | A | C |
| ATOM | 741 | CG1 | ILE | A | 270 | 75.096 | 101.970 | -82.338 | 1.00105.76 | A | C |
| ATOM | 742 | CD1 | ILE | A | 270 | 74.254 | 101.166 | -81.371 | 1.00105.76 | A | C |
| ATOM | 743 | C   | ILE | A | 270 | 75.605 | 103.204 | -84.979 | 1.00105.76 | A | C |
| ATOM | 744 | O   | ILE | A | 270 | 74.647 | 102.990 | -85.721 | 1.00105.76 | A | O |
| ATOM | 745 | N   | LEU | A | 271 | 75.954 | 104.424 | -84.586 | 1.00 71.73 | A | N |
| ATOM | 746 | CA  | LEU | A | 271 | 75.204 | 105.606 | -85.004 | 1.00 71.73 | A | C |
| ATOM | 747 | CB  | LEU | A | 271 | 75.712 | 106.862 | -84.287 | 1.00 71.73 | A | C |
| ATOM | 748 | CG  | LEU | A | 271 | 75.475 | 106.934 | -82.778 | 1.00 71.73 | A | C |
| ATOM | 749 | CD1 | LEU | A | 271 | 76.083 | 108.203 | -82.200 | 1.00 71.73 | A | C |
| ATOM | 750 | CD2 | LEU | A | 271 | 73.988 | 106.857 | -82.465 | 1.00 71.73 | A | C |
| ATOM | 751 | C   | LEU | A | 271 | 75.210 | 105.817 | -86.520 | 1.00 71.73 | A | C |
| ATOM | 752 | O   | LEU | A | 271 | 74.151 | 105.974 | -87.127 | 1.00 71.73 | A | O |
| ATOM | 753 | N   | PRO | A | 272 | 76.404 | 105.823 | -87.139 | 1.00 85.42 | A | N |
| ATOM | 754 | CA  | PRO | A | 272 | 76.492 | 106.046 | -88.587 | 1.00 85.42 | A | C |
| ATOM | 755 | CD  | PRO | A | 272 | 77.735 | 105.666 | -86.527 | 1.00 85.42 | A | C |
| ATOM | 756 | CB  | PRO | A | 272 | 77.983 | 105.849 | -88.877 | 1.00 85.42 | A | C |
| ATOM | 757 | CG  | PRO | A | 272 | 78.659 | 106.169 | -87.594 | 1.00 85.42 | A | C |
| ATOM | 758 | C   | PRO | A | 272 | 75.668 | 105.041 | -89.387 | 1.00 85.42 | A | C |
| ATOM | 759 | O   | PRO | A | 272 | 75.293 | 105.324 | -90.525 | 1.00 85.42 | A | O |
| ATOM | 760 | N   | TYR | A | 273 | 75.393 | 103.883 | -88.796 | 1.00 80.36 | A | N |
| ATOM | 761 | CA  | TYR | A | 273 | 74.632 | 102.841 | -89.475 | 1.00 80.36 | A | C |
| ATOM | 762 | CB  | TYR | A | 273 | 74.774 | 101.507 | -88.739 | 1.00 80.36 | A | C |
| ATOM | 763 | CG  | TYR | A | 273 | 74.047 | 100.361 | -89.405 | 1.00 80.36 | A | C |
| ATOM | 764 | CD1 | TYR | A | 273 | 74.652 | 99.621  | -90.413 | 1.00 80.36 | A | C |
| ATOM | 765 | CD2 | TYR | A | 273 | 72.756 | 100.017 | -89.026 | 1.00 80.36 | A | C |
| ATOM | 766 | CE1 | TYR | A | 273 | 73.992 | 98.572  | -91.025 | 1.00 80.36 | A | C |
| ATOM | 767 | CE2 | TYR | A | 273 | 72.088 | 98.970  | -89.632 | 1.00 80.36 | A | C |
| ATOM | 768 | CZ  | TYR | A | 273 | 72.711 | 98.251  | -90.631 | 1.00 80.36 | A | C |
| ATOM | 769 | OH  | TYR | A | 273 | 72.050 | 97.208  | -91.238 | 1.00 80.36 | A | O |
| ATOM | 770 | C   | TYR | A | 273 | 73.158 | 103.216 | -89.603 | 1.00 80.36 | A | C |
| ATOM | 771 | O   | TYR | A | 273 | 72.606 | 103.235 | -90.703 | 1.00 80.36 | A | O |
| ATOM | 772 | N   | TYR | A | 274 | 72.527 | 103.512 | -88.472 | 1.00 58.29 | A | N |
| ATOM | 773 | CA  | TYR | A | 274 | 71.111 | 103.860 | -88.454 | 1.00 58.29 | A | C |
| ATOM | 774 | CB  | TYR | A | 274 | 70.575 | 103.855 | -87.020 | 1.00 58.29 | A | C |
| ATOM | 775 | CG  | TYR | A | 274 | 70.610 | 102.495 | -86.362 | 1.00 58.29 | A | C |
| ATOM | 776 | CD1 | TYR | A | 274 | 71.707 | 102.092 | -85.613 | 1.00 58.29 | A | C |
| ATOM | 777 | CD2 | TYR | A | 274 | 69.546 | 101.612 | -86.493 | 1.00 58.29 | A | C |
| ATOM | 778 | CE1 | TYR | A | 274 | 71.744 | 100.849 | -85.011 | 1.00 58.29 | A | C |
| ATOM | 779 | CE2 | TYR | A | 274 | 69.574 | 100.367 | -85.894 | 1.00 58.29 | A | C |
| ATOM | 780 | CZ  | TYR | A | 274 | 70.674 | 99.990  | -85.155 | 1.00 58.29 | A | C |
| ATOM | 781 | OH  | TYR | A | 274 | 70.705 | 98.751  | -84.558 | 1.00 58.29 | A | O |
| ATOM | 782 | C   | TYR | A | 274 | 70.852 | 105.214 | -89.107 | 1.00 58.29 | A | C |
| ATOM | 783 | O   | TYR | A | 274 | 69.905 | 105.370 | -89.877 | 1.00 58.29 | A | O |
| ATOM | 784 | N   | ILE | A | 275 | 71.700 | 106.189 | -88.795 | 1.00 98.26 | A | N |
| ATOM | 785 | CA  | ILE | A | 275 | 71.558 | 107.533 | -89.345 | 1.00 98.26 | A | C |
| ATOM | 786 | CB  | ILE | A | 275 | 72.614 | 108.495 | -88.767 | 1.00 98.26 | A | C |
| ATOM | 787 | CG2 | ILE | A | 275 | 72.485 | 109.872 | -89.398 | 1.00 98.26 | A | C |
| ATOM | 788 | CG1 | ILE | A | 275 | 72.474 | 108.589 | -87.246 | 1.00 98.26 | A | C |

|      |     |     |     |   |     |        |         |          |      |        |   |   |
|------|-----|-----|-----|---|-----|--------|---------|----------|------|--------|---|---|
| ATOM | 789 | CD1 | ILE | A | 275 | 73.488 | 109.505 | -86.595  | 1.00 | 98.26  | A | C |
| ATOM | 790 | C   | ILE | A | 275 | 71.662 | 107.527 | -90.867  | 1.00 | 98.26  | A | C |
| ATOM | 791 | O   | ILE | A | 275 | 70.903 | 108.211 | -91.553  | 1.00 | 98.26  | A | O |
| ATOM | 792 | N   | GLY | A | 276 | 72.604 | 106.748 | -91.389  | 1.00 | 33.27  | A | N |
| ATOM | 793 | CA  | GLY | A | 276 | 72.811 | 106.658 | -92.822  | 1.00 | 33.27  | A | C |
| ATOM | 794 | C   | GLY | A | 276 | 71.634 | 106.042 | -93.552  | 1.00 | 33.27  | A | C |
| ATOM | 795 | O   | GLY | A | 276 | 71.252 | 106.499 | -94.628  | 1.00 | 33.27  | A | O |
| ATOM | 796 | N   | LEU | A | 277 | 71.057 | 104.999 | -92.963  | 1.00 | 135.89 | A | N |
| ATOM | 797 | CA  | LEU | A | 277 | 69.929 | 104.302 | -93.572  | 1.00 | 135.89 | A | C |
| ATOM | 798 | CB  | LEU | A | 277 | 69.588 | 103.040 | -92.778  | 1.00 | 135.89 | A | C |
| ATOM | 799 | CG  | LEU | A | 277 | 68.414 | 102.209 | -93.301  | 1.00 | 135.89 | A | C |
| ATOM | 800 | CD1 | LEU | A | 277 | 68.645 | 101.803 | -94.749  | 1.00 | 135.89 | A | C |
| ATOM | 801 | CD2 | LEU | A | 277 | 68.191 | 100.985 | -92.426  | 1.00 | 135.89 | A | C |
| ATOM | 802 | C   | LEU | A | 277 | 68.703 | 105.203 | -93.675  | 1.00 | 135.89 | A | C |
| ATOM | 803 | O   | LEU | A | 277 | 67.973 | 105.161 | -94.666  | 1.00 | 135.89 | A | O |
| ATOM | 804 | N   | VAL | A | 278 | 68.481 | 106.016 | -92.648  | 1.00 | 91.77  | A | N |
| ATOM | 805 | CA  | VAL | A | 278 | 67.333 | 106.913 | -92.616  | 1.00 | 91.77  | A | C |
| ATOM | 806 | CB  | VAL | A | 278 | 67.085 | 107.461 | -91.198  | 1.00 | 91.77  | A | C |
| ATOM | 807 | CG1 | VAL | A | 278 | 65.917 | 108.435 | -91.202  | 1.00 | 91.77  | A | C |
| ATOM | 808 | CG2 | VAL | A | 278 | 66.833 | 106.321 | -90.225  | 1.00 | 91.77  | A | C |
| ATOM | 809 | C   | VAL | A | 278 | 67.511 | 108.082 | -93.579  | 1.00 | 91.77  | A | C |
| ATOM | 810 | O   | VAL | A | 278 | 66.583 | 108.453 | -94.298  | 1.00 | 91.77  | A | O |
| ATOM | 811 | N   | MET | A | 279 | 68.710 | 108.656 | -93.590  | 1.00 | 131.98 | A | N |
| ATOM | 812 | CA  | MET | A | 279 | 69.001 | 109.805 | -94.441  | 1.00 | 131.98 | A | C |
| ATOM | 813 | CB  | MET | A | 279 | 70.395 | 110.359 | -94.139  | 1.00 | 131.98 | A | C |
| ATOM | 814 | CG  | MET | A | 279 | 70.763 | 111.587 | -94.956  | 1.00 | 131.98 | A | C |
| ATOM | 815 | SD  | MET | A | 279 | 72.386 | 112.248 | -94.533  | 1.00 | 131.98 | A | S |
| ATOM | 816 | CE  | MET | A | 279 | 72.144 | 112.673 | -92.810  | 1.00 | 131.98 | A | C |
| ATOM | 817 | C   | MET | A | 279 | 68.882 | 109.457 | -95.923  | 1.00 | 131.98 | A | C |
| ATOM | 818 | O   | MET | A | 279 | 68.244 | 110.179 | -96.688  | 1.00 | 131.98 | A | O |
| ATOM | 819 | N   | THR | A | 280 | 69.499 | 108.349 | -96.321  | 1.00 | 57.64  | A | N |
| ATOM | 820 | CA  | THR | A | 280 | 69.469 | 107.915 | -97.713  | 1.00 | 57.64  | A | C |
| ATOM | 821 | CB  | THR | A | 280 | 70.408 | 106.718 | -97.955  | 1.00 | 57.64  | A | C |
| ATOM | 822 | OG1 | THR | A | 280 | 70.029 | 105.629 | -97.104  | 1.00 | 57.64  | A | O |
| ATOM | 823 | CG2 | THR | A | 280 | 71.850 | 107.104 | -97.665  | 1.00 | 57.64  | A | C |
| ATOM | 824 | C   | THR | A | 280 | 68.058 | 107.540 | -98.154  | 1.00 | 57.64  | A | C |
| ATOM | 825 | O   | THR | A | 280 | 67.752 | 107.530 | -99.346  | 1.00 | 57.64  | A | O |
| ATOM | 826 | N   | ASP | A | 281 | 67.202 | 107.230 | -97.186  | 1.00 | 89.40  | A | N |
| ATOM | 827 | CA  | ASP | A | 281 | 65.821 | 106.863 | -97.474  | 1.00 | 89.40  | A | C |
| ATOM | 828 | CB  | ASP | A | 281 | 65.225 | 106.070 | -96.308  | 1.00 | 89.40  | A | C |
| ATOM | 829 | CG  | ASP | A | 281 | 63.896 | 105.426 | -96.655  | 1.00 | 89.40  | A | C |
| ATOM | 830 | OD1 | ASP | A | 281 | 63.156 | 105.986 | -97.491  | 1.00 | 89.40  | A | O |
| ATOM | 831 | OD2 | ASP | A | 281 | 63.590 | 104.355 | -96.090  | 1.00 | 89.40  | A | O |
| ATOM | 832 | C   | ASP | A | 281 | 64.983 | 108.107 | -97.747  | 1.00 | 89.40  | A | C |
| ATOM | 833 | O   | ASP | A | 281 | 64.235 | 108.162 | -98.723  | 1.00 | 89.40  | A | O |
| ATOM | 834 | N   | ASN | A | 282 | 65.116 | 109.104 | -96.879  | 1.00 | 77.30  | A | N |
| ATOM | 835 | CA  | ASN | A | 282 | 64.365 | 110.346 | -97.016  | 1.00 | 77.30  | A | C |
| ATOM | 836 | CB  | ASN | A | 282 | 64.587 | 111.242 | -95.796  | 1.00 | 77.30  | A | C |
| ATOM | 837 | CG  | ASN | A | 282 | 64.129 | 110.593 | -94.505  | 1.00 | 77.30  | A | C |
| ATOM | 838 | OD1 | ASN | A | 282 | 63.198 | 109.788 | -94.497  | 1.00 | 77.30  | A | O |
| ATOM | 839 | ND2 | ASN | A | 282 | 64.784 | 110.941 | -93.403  | 1.00 | 77.30  | A | N |
| ATOM | 840 | C   | ASN | A | 282 | 64.717 | 111.104 | -98.293  | 1.00 | 77.30  | A | C |
| ATOM | 841 | O   | ASN | A | 282 | 63.860 | 111.330 | -99.148  | 1.00 | 77.30  | A | O |
| ATOM | 842 | N   | GLU | A | 283 | 65.982 | 111.493 | -98.416  | 1.00 | 247.84 | A | N |
| ATOM | 843 | CA  | GLU | A | 283 | 66.443 | 112.237 | -99.582  | 1.00 | 247.84 | A | C |
| ATOM | 844 | CB  | GLU | A | 283 | 66.559 | 113.728 | -99.255  | 1.00 | 247.84 | A | C |
| ATOM | 845 | CG  | GLU | A | 283 | 66.997 | 114.601 | -100.422 | 1.00 | 247.84 | A | C |
| ATOM | 846 | CD  | GLU | A | 283 | 65.951 | 114.697 | -101.519 | 1.00 | 247.84 | A | C |
| ATOM | 847 | OE1 | GLU | A | 283 | 65.379 | 113.655 | -101.901 | 1.00 | 247.84 | A | O |
| ATOM | 848 | OE2 | GLU | A | 283 | 65.699 | 115.822 | -102.000 | 1.00 | 247.84 | A | O |
| ATOM | 849 | C   | GLU | A | 283 | 67.778 | 111.702 | -100.092 | 1.00 | 247.84 | A | C |
| ATOM | 850 | O   | GLU | A | 283 | 68.628 | 111.277 | -99.309  | 1.00 | 247.84 | A | O |
| ATOM | 851 | N   | ASP | A | 284 | 67.955 | 111.728 | -101.409 | 1.00 | 243.54 | A | N |
| ATOM | 852 | CA  | ASP | A | 284 | 69.173 | 111.221 | -102.032 | 1.00 | 243.54 | A | C |
| ATOM | 853 | CB  | ASP | A | 284 | 68.839 | 110.430 | -103.302 | 1.00 | 243.54 | A | C |
| ATOM | 854 | CG  | ASP | A | 284 | 68.097 | 111.261 | -104.334 | 1.00 | 243.54 | A | C |
| ATOM | 855 | OD1 | ASP | A | 284 | 67.344 | 112.177 | -103.940 | 1.00 | 243.54 | A | O |
| ATOM | 856 | OD2 | ASP | A | 284 | 68.267 | 110.996 | -105.542 | 1.00 | 243.54 | A | O |



|      |     |     |     |   |     |        |         |          |            |   |   |
|------|-----|-----|-----|---|-----|--------|---------|----------|------------|---|---|
| ATOM | 857 | C   | ASP | A | 284 | 70.166 | 112.338 | -102.346 | 1.00243.54 | A | C |
| ATOM | 858 | O   | ASP | A | 284 | 70.378 | 112.687 | -103.507 | 1.00243.54 | A | O |
| ATOM | 859 | N   | VAL | A | 285 | 70.774 | 112.893 | -101.302 | 1.00154.00 | A | N |
| ATOM | 860 | CA  | VAL | A | 285 | 71.774 | 113.943 | -101.467 | 1.00154.00 | A | C |
| ATOM | 861 | CB  | VAL | A | 285 | 71.442 | 115.183 | -100.616 | 1.00154.00 | A | C |
| ATOM | 862 | CG1 | VAL | A | 285 | 70.187 | 115.865 | -101.138 | 1.00154.00 | A | C |
| ATOM | 863 | CG2 | VAL | A | 285 | 71.283 | 114.795 | -99.153  | 1.00154.00 | A | C |
| ATOM | 864 | C   | VAL | A | 285 | 73.164 | 113.438 | -101.095 | 1.00154.00 | A | C |
| ATOM | 865 | O   | VAL | A | 285 | 73.357 | 112.247 | -100.852 | 1.00154.00 | A | O |
| ATOM | 866 | N   | SER | A | 286 | 74.129 | 114.351 | -101.054 | 1.00204.33 | A | N |
| ATOM | 867 | CA  | SER | A | 286 | 75.503 | 113.998 | -100.718 | 1.00204.33 | A | C |
| ATOM | 868 | CB  | SER | A | 286 | 76.303 | 113.696 | -101.987 | 1.00204.33 | A | C |
| ATOM | 869 | OG  | SER | A | 286 | 75.722 | 112.629 | -102.716 | 1.00204.33 | A | O |
| ATOM | 870 | C   | SER | A | 286 | 76.182 | 115.107 | -99.922  | 1.00204.33 | A | C |
| ATOM | 871 | O   | SER | A | 286 | 76.000 | 116.290 | -100.209 | 1.00204.33 | A | O |
| ATOM | 872 | N   | GLY | A | 287 | 76.964 | 114.717 | -98.921  | 1.00 74.32 | A | N |
| ATOM | 873 | CA  | GLY | A | 287 | 77.680 | 115.673 | -98.098  | 1.00 74.32 | A | C |
| ATOM | 874 | C   | GLY | A | 287 | 77.455 | 115.463 | -96.613  | 1.00 74.32 | A | C |
| ATOM | 875 | O   | GLY | A | 287 | 78.381 | 115.591 | -95.812  | 1.00 74.32 | A | O |
| ATOM | 876 | N   | ALA | A | 288 | 76.220 | 115.140 | -96.245  | 1.00 54.17 | A | N |
| ATOM | 877 | CA  | ALA | A | 288 | 75.867 | 114.938 | -94.844  | 1.00 54.17 | A | C |
| ATOM | 878 | CB  | ALA | A | 288 | 74.378 | 115.167 | -94.634  | 1.00 54.17 | A | C |
| ATOM | 879 | C   | ALA | A | 288 | 76.270 | 113.549 | -94.355  | 1.00 54.17 | A | C |
| ATOM | 880 | O   | ALA | A | 288 | 77.015 | 113.416 | -93.384  | 1.00 54.17 | A | O |
| ATOM | 881 | N   | PHE | A | 289 | 75.775 | 112.519 | -95.034  | 1.00205.64 | A | N |
| ATOM | 882 | CA  | PHE | A | 289 | 76.067 | 111.139 | -94.656  | 1.00205.64 | A | C |
| ATOM | 883 | CB  | PHE | A | 289 | 75.099 | 110.168 | -95.342  | 1.00205.64 | A | C |
| ATOM | 884 | CG  | PHE | A | 289 | 75.261 | 110.095 | -96.837  | 1.00205.64 | A | C |
| ATOM | 885 | CD1 | PHE | A | 289 | 75.776 | 111.163 | -97.553  | 1.00205.64 | A | C |
| ATOM | 886 | CD2 | PHE | A | 289 | 74.892 | 108.951 | -97.527  | 1.00205.64 | A | C |
| ATOM | 887 | CE1 | PHE | A | 289 | 75.922 | 111.092 | -98.925  | 1.00205.64 | A | C |
| ATOM | 888 | CE2 | PHE | A | 289 | 75.035 | 108.875 | -98.899  | 1.00205.64 | A | C |
| ATOM | 889 | CZ  | PHE | A | 289 | 75.551 | 109.946 | -99.599  | 1.00205.64 | A | C |
| ATOM | 890 | C   | PHE | A | 289 | 77.512 | 110.753 | -94.962  | 1.00205.64 | A | C |
| ATOM | 891 | O   | PHE | A | 289 | 77.955 | 109.656 | -94.624  | 1.00205.64 | A | O |
| ATOM | 892 | N   | VAL | A | 290 | 78.240 | 111.661 | -95.604  | 1.00 43.82 | A | N |
| ATOM | 893 | CA  | VAL | A | 290 | 79.640 | 111.426 | -95.932  | 1.00 43.82 | A | C |
| ATOM | 894 | CB  | VAL | A | 290 | 80.148 | 112.429 | -96.986  | 1.00 43.82 | A | C |
| ATOM | 895 | CG1 | VAL | A | 290 | 81.623 | 112.197 | -97.275  | 1.00 43.82 | A | C |
| ATOM | 896 | CG2 | VAL | A | 290 | 79.326 | 112.318 | -98.262  | 1.00 43.82 | A | C |
| ATOM | 897 | C   | VAL | A | 290 | 80.510 | 111.523 | -94.682  | 1.00 43.82 | A | C |
| ATOM | 898 | O   | VAL | A | 290 | 81.477 | 110.777 | -94.526  | 1.00 43.82 | A | O |
| ATOM | 899 | N   | THR | A | 291 | 80.155 | 112.445 | -93.793  | 1.00 50.43 | A | N |
| ATOM | 900 | CA  | THR | A | 291 | 80.896 | 112.640 | -92.553  | 1.00 50.43 | A | C |
| ATOM | 901 | CB  | THR | A | 291 | 80.452 | 113.925 | -91.826  | 1.00 50.43 | A | C |
| ATOM | 902 | OG1 | THR | A | 291 | 80.612 | 115.051 | -92.699  | 1.00 50.43 | A | O |
| ATOM | 903 | CG2 | THR | A | 291 | 81.281 | 114.142 | -90.569  | 1.00 50.43 | A | C |
| ATOM | 904 | C   | THR | A | 291 | 80.725 | 111.448 | -91.616  | 1.00 50.43 | A | C |
| ATOM | 905 | O   | THR | A | 291 | 81.669 | 111.038 | -90.940  | 1.00 50.43 | A | O |
| ATOM | 906 | N   | LEU | A | 292 | 79.516 | 110.894 | -91.582  | 1.00 89.67 | A | N |
| ATOM | 907 | CA  | LEU | A | 292 | 79.222 | 109.743 | -90.735  | 1.00 89.67 | A | C |
| ATOM | 908 | CB  | LEU | A | 292 | 77.731 | 109.396 | -90.787  | 1.00 89.67 | A | C |
| ATOM | 909 | CG  | LEU | A | 292 | 76.754 | 110.324 | -90.058  | 1.00 89.67 | A | C |
| ATOM | 910 | CD1 | LEU | A | 292 | 77.101 | 110.412 | -88.579  | 1.00 89.67 | A | C |
| ATOM | 911 | CD2 | LEU | A | 292 | 76.724 | 111.709 | -90.689  | 1.00 89.67 | A | C |
| ATOM | 912 | C   | LEU | A | 292 | 80.054 | 108.531 | -91.138  | 1.00 89.67 | A | C |
| ATOM | 913 | O   | LEU | A | 292 | 80.336 | 107.657 | -90.317  | 1.00 89.67 | A | O |
| ATOM | 914 | N   | ARG | A | 293 | 80.443 | 108.483 | -92.408  | 1.00153.52 | A | N |
| ATOM | 915 | CA  | ARG | A | 293 | 81.265 | 107.394 | -92.918  | 1.00153.52 | A | C |
| ATOM | 916 | CB  | ARG | A | 293 | 81.465 | 107.543 | -94.429  | 1.00153.52 | A | C |
| ATOM | 917 | CG  | ARG | A | 293 | 81.894 | 106.269 | -95.148  | 1.00153.52 | A | C |
| ATOM | 918 | CD  | ARG | A | 293 | 83.334 | 105.896 | -94.838  | 1.00153.52 | A | C |
| ATOM | 919 | NE  | ARG | A | 293 | 83.755 | 104.695 | -95.553  | 1.00153.52 | A | N |
| ATOM | 920 | CZ  | ARG | A | 293 | 84.948 | 104.126 | -95.418  | 1.00153.52 | A | C |
| ATOM | 921 | NH1 | ARG | A | 293 | 85.842 | 104.647 | -94.590  | 1.00153.52 | A | N |
| ATOM | 922 | NH2 | ARG | A | 293 | 85.247 | 103.034 | -96.109  | 1.00153.52 | A | N |
| ATOM | 923 | C   | ARG | A | 293 | 82.610 | 107.381 | -92.198  | 1.00153.52 | A | C |
| ATOM | 924 | O   | ARG | A | 293 | 83.116 | 106.324 | -91.823  | 1.00153.52 | A | O |

|      |     |     |     |   |     |        |         |         |            |   |   |
|------|-----|-----|-----|---|-----|--------|---------|---------|------------|---|---|
| ATOM | 925 | N   | VAL | A | 294 | 83.180 | 108.566 | -92.005 | 1.00148.57 | A | N |
| ATOM | 926 | CA  | VAL | A | 294 | 84.456 | 108.702 | -91.314 | 1.00148.57 | A | C |
| ATOM | 927 | CB  | VAL | A | 294 | 84.968 | 110.155 | -91.361 | 1.00148.57 | A | C |
| ATOM | 928 | CG1 | VAL | A | 294 | 86.310 | 110.270 | -90.655 | 1.00148.57 | A | C |
| ATOM | 929 | CG2 | VAL | A | 294 | 85.076 | 110.631 | -92.801 | 1.00148.57 | A | C |
| ATOM | 930 | C   | VAL | A | 294 | 84.338 | 108.257 | -89.859 | 1.00148.57 | A | C |
| ATOM | 931 | O   | VAL | A | 294 | 85.288 | 107.727 | -89.281 | 1.00148.57 | A | O |
| ATOM | 932 | N   | PHE | A | 295 | 83.165 | 108.472 | -89.273 | 1.00171.25 | A | N |
| ATOM | 933 | CA  | PHE | A | 295 | 82.919 | 108.098 | -87.885 | 1.00171.25 | A | C |
| ATOM | 934 | CB  | PHE | A | 295 | 81.616 | 108.723 | -87.381 | 1.00171.25 | A | C |
| ATOM | 935 | CG  | PHE | A | 295 | 81.643 | 110.223 | -87.331 | 1.00171.25 | A | C |
| ATOM | 936 | CD1 | PHE | A | 295 | 82.847 | 110.908 | -87.299 | 1.00171.25 | A | C |
| ATOM | 937 | CD2 | PHE | A | 295 | 80.465 | 110.950 | -87.315 | 1.00171.25 | A | C |
| ATOM | 938 | CE1 | PHE | A | 295 | 82.875 | 112.288 | -87.253 | 1.00171.25 | A | C |
| ATOM | 939 | CE2 | PHE | A | 295 | 80.486 | 112.331 | -87.269 | 1.00171.25 | A | C |
| ATOM | 940 | CZ  | PHE | A | 295 | 81.692 | 113.001 | -87.237 | 1.00171.25 | A | C |
| ATOM | 941 | C   | PHE | A | 295 | 82.876 | 106.583 | -87.710 | 1.00171.25 | A | C |
| ATOM | 942 | O   | PHE | A | 295 | 82.927 | 106.077 | -86.590 | 1.00171.25 | A | O |
| ATOM | 943 | N   | ARG | A | 296 | 82.780 | 105.864 | -88.824 | 1.00159.61 | A | N |
| ATOM | 944 | CA  | ARG | A | 296 | 82.746 | 104.407 | -88.793 | 1.00159.61 | A | C |
| ATOM | 945 | CB  | ARG | A | 296 | 82.226 | 103.853 | -90.121 | 1.00159.61 | A | C |
| ATOM | 946 | CG  | ARG | A | 296 | 80.816 | 104.301 | -90.471 | 1.00159.61 | A | C |
| ATOM | 947 | CD  | ARG | A | 296 | 80.370 | 103.743 | -91.813 | 1.00159.61 | A | C |
| ATOM | 948 | NE  | ARG | A | 296 | 80.341 | 102.283 | -91.823 | 1.00159.61 | A | N |
| ATOM | 949 | CZ  | ARG | A | 296 | 81.330 | 101.518 | -92.274 | 1.00159.61 | A | C |
| ATOM | 950 | NH1 | ARG | A | 296 | 82.433 | 102.073 | -92.758 | 1.00159.61 | A | N |
| ATOM | 951 | NH2 | ARG | A | 296 | 81.217 | 100.197 | -92.244 | 1.00159.61 | A | N |
| ATOM | 952 | C   | ARG | A | 296 | 84.126 | 103.833 | -88.488 | 1.00159.61 | A | C |
| ATOM | 953 | O   | ARG | A | 296 | 84.280 | 102.627 | -88.299 | 1.00159.61 | A | O |
| ATOM | 954 | N   | VAL | A | 297 | 85.127 | 104.706 | -88.444 | 1.00167.62 | A | N |
| ATOM | 955 | CA  | VAL | A | 297 | 86.493 | 104.293 | -88.144 | 1.00167.62 | A | C |
| ATOM | 956 | CB  | VAL | A | 297 | 87.520 | 105.237 | -88.801 | 1.00167.62 | A | C |
| ATOM | 957 | CG1 | VAL | A | 297 | 88.938 | 104.740 | -88.556 | 1.00167.62 | A | C |
| ATOM | 958 | CG2 | VAL | A | 297 | 87.248 | 105.360 | -90.291 | 1.00167.62 | A | C |
| ATOM | 959 | C   | VAL | A | 297 | 86.721 | 104.261 | -86.636 | 1.00167.62 | A | C |
| ATOM | 960 | O   | VAL | A | 297 | 87.650 | 103.616 | -86.150 | 1.00167.62 | A | O |
| ATOM | 961 | N   | PHE | A | 298 | 85.858 | 104.954 | -85.900 | 1.00121.45 | A | N |
| ATOM | 962 | CA  | PHE | A | 298 | 85.974 | 105.030 | -84.448 | 1.00121.45 | A | C |
| ATOM | 963 | CB  | PHE | A | 298 | 85.110 | 106.167 | -83.898 | 1.00121.45 | A | C |
| ATOM | 964 | CG  | PHE | A | 298 | 85.544 | 107.532 | -84.351 | 1.00121.45 | A | C |
| ATOM | 965 | CD1 | PHE | A | 298 | 86.830 | 107.744 | -84.821 | 1.00121.45 | A | C |
| ATOM | 966 | CD2 | PHE | A | 298 | 84.668 | 108.603 | -84.305 | 1.00121.45 | A | C |
| ATOM | 967 | CE1 | PHE | A | 298 | 87.233 | 108.999 | -85.237 | 1.00121.45 | A | C |
| ATOM | 968 | CE2 | PHE | A | 298 | 85.065 | 109.860 | -84.720 | 1.00121.45 | A | C |
| ATOM | 969 | CZ  | PHE | A | 298 | 86.349 | 110.058 | -85.187 | 1.00121.45 | A | C |
| ATOM | 970 | C   | PHE | A | 298 | 85.603 | 103.713 | -83.771 | 1.00121.45 | A | C |
| ATOM | 971 | O   | PHE | A | 298 | 85.603 | 103.616 | -82.544 | 1.00121.45 | A | O |
| ATOM | 972 | N   | ARG | A | 299 | 85.289 | 102.702 | -84.575 | 1.00168.10 | A | N |
| ATOM | 973 | CA  | ARG | A | 299 | 84.948 | 101.386 | -84.046 | 1.00168.10 | A | C |
| ATOM | 974 | CB  | ARG | A | 299 | 84.261 | 100.537 | -85.116 | 1.00168.10 | A | C |
| ATOM | 975 | CG  | ARG | A | 299 | 85.115 | 100.272 | -86.344 | 1.00168.10 | A | C |
| ATOM | 976 | CD  | ARG | A | 299 | 84.360 | 99.447  | -87.374 | 1.00168.10 | A | C |
| ATOM | 977 | NE  | ARG | A | 299 | 83.126 | 100.103 | -87.797 | 1.00168.10 | A | N |
| ATOM | 978 | CZ  | ARG | A | 299 | 82.300 | 99.619  | -88.719 | 1.00168.10 | A | C |
| ATOM | 979 | NH1 | ARG | A | 299 | 82.574 | 98.469  | -89.320 | 1.00168.10 | A | N |
| ATOM | 980 | NH2 | ARG | A | 299 | 81.199 | 100.285 | -89.040 | 1.00168.10 | A | N |
| ATOM | 981 | C   | ARG | A | 299 | 86.193 | 100.674 | -83.527 | 1.00168.10 | A | C |
| ATOM | 982 | O   | ARG | A | 299 | 86.099 | 99.627  | -82.886 | 1.00168.10 | A | O |
| ATOM | 983 | N   | ILE | A | 300 | 87.356 | 101.251 | -83.809 | 1.00203.46 | A | N |
| ATOM | 984 | CA  | ILE | A | 300 | 88.623 | 100.691 | -83.355 | 1.00203.46 | A | C |
| ATOM | 985 | CB  | ILE | A | 300 | 89.800 | 101.212 | -84.200 | 1.00203.46 | A | C |
| ATOM | 986 | CG2 | ILE | A | 300 | 91.095 | 100.519 | -83.801 | 1.00203.46 | A | C |
| ATOM | 987 | CG1 | ILE | A | 300 | 89.515 | 101.009 | -85.690 | 1.00203.46 | A | C |
| ATOM | 988 | CD1 | ILE | A | 300 | 90.603 | 101.534 | -86.597 | 1.00203.46 | A | C |
| ATOM | 989 | C   | ILE | A | 300 | 88.865 | 101.031 | -81.888 | 1.00203.46 | A | C |
| ATOM | 990 | O   | ILE | A | 300 | 89.607 | 100.339 | -81.192 | 1.00203.46 | A | O |
| ATOM | 991 | N   | PHE | A | 301 | 88.227 | 102.101 | -81.423 | 1.00106.14 | A | N |
| ATOM | 992 | CA  | PHE | A | 301 | 88.351 | 102.523 | -80.033 | 1.00106.14 | A | C |

|      |      |     |     |   |     |        |         |         |            |   |   |
|------|------|-----|-----|---|-----|--------|---------|---------|------------|---|---|
| ATOM | 993  | CB  | PHE | A | 301 | 87.844 | 103.956 | -79.859 | 1.00106.14 | A | C |
| ATOM | 994  | CG  | PHE | A | 301 | 88.665 | 104.983 | -80.584 | 1.00106.14 | A | C |
| ATOM | 995  | CD1 | PHE | A | 301 | 89.985 | 104.726 | -80.914 | 1.00106.14 | A | C |
| ATOM | 996  | CD2 | PHE | A | 301 | 88.118 | 106.206 | -80.935 | 1.00106.14 | A | C |
| ATOM | 997  | CE1 | PHE | A | 301 | 90.744 | 105.668 | -81.580 | 1.00106.14 | A | C |
| ATOM | 998  | CE2 | PHE | A | 301 | 88.872 | 107.153 | -81.602 | 1.00106.14 | A | C |
| ATOM | 999  | CZ  | PHE | A | 301 | 90.187 | 106.884 | -81.925 | 1.00106.14 | A | C |
| ATOM | 1000 | C   | PHE | A | 301 | 87.594 | 101.584 | -79.100 | 1.00106.14 | A | C |
| ATOM | 1001 | O   | PHE | A | 301 | 87.511 | 101.826 | -77.896 | 1.00106.14 | A | O |
| ATOM | 1002 | N   | LYS | A | 302 | 87.042 | 100.514 | -79.662 | 1.00168.00 | A | N |
| ATOM | 1003 | CA  | LYS | A | 302 | 86.283 | 99.545  | -78.881 | 1.00168.00 | A | C |
| ATOM | 1004 | CB  | LYS | A | 302 | 85.291 | 98.797  | -79.775 | 1.00168.00 | A | C |
| ATOM | 1005 | CG  | LYS | A | 302 | 84.276 | 97.958  | -79.015 | 1.00168.00 | A | C |
| ATOM | 1006 | CD  | LYS | A | 302 | 83.270 | 97.318  | -79.959 | 1.00168.00 | A | C |
| ATOM | 1007 | CE  | LYS | A | 302 | 82.509 | 98.367  | -80.753 | 1.00168.00 | A | C |
| ATOM | 1008 | NZ  | LYS | A | 302 | 81.734 | 99.280  | -79.870 | 1.00168.00 | A | N |
| ATOM | 1009 | C   | LYS | A | 302 | 87.215 | 98.563  | -78.176 | 1.00168.00 | A | C |
| ATOM | 1010 | O   | LYS | A | 302 | 86.805 | 97.850  | -77.261 | 1.00168.00 | A | O |
| ATOM | 1011 | N   | PHE | A | 303 | 88.473 | 98.535  | -78.607 | 1.00 83.96 | A | N |
| ATOM | 1012 | CA  | PHE | A | 303 | 89.474 | 97.675  | -77.985 | 1.00 83.96 | A | C |
| ATOM | 1013 | CB  | PHE | A | 303 | 90.721 | 97.567  | -78.867 | 1.00 83.96 | A | C |
| ATOM | 1014 | CG  | PHE | A | 303 | 90.507 | 96.784  | -80.130 | 1.00 83.96 | A | C |
| ATOM | 1015 | CD1 | PHE | A | 303 | 90.525 | 95.399  | -80.113 | 1.00 83.96 | A | C |
| ATOM | 1016 | CD2 | PHE | A | 303 | 90.299 | 97.431  | -81.336 | 1.00 83.96 | A | C |
| ATOM | 1017 | CE1 | PHE | A | 303 | 90.333 | 94.675  | -81.273 | 1.00 83.96 | A | C |
| ATOM | 1018 | CE2 | PHE | A | 303 | 90.107 | 96.712  | -82.501 | 1.00 83.96 | A | C |
| ATOM | 1019 | CZ  | PHE | A | 303 | 90.124 | 95.332  | -82.469 | 1.00 83.96 | A | C |
| ATOM | 1020 | C   | PHE | A | 303 | 89.860 | 98.192  | -76.604 | 1.00 83.96 | A | C |
| ATOM | 1021 | O   | PHE | A | 303 | 90.533 | 97.501  | -75.839 | 1.00 83.96 | A | O |
| ATOM | 1022 | N   | SER | A | 304 | 89.432 | 99.411  | -76.290 | 1.00 64.30 | A | N |
| ATOM | 1023 | CA  | SER | A | 304 | 89.732 | 100.022 | -75.001 | 1.00 64.30 | A | C |
| ATOM | 1024 | CB  | SER | A | 304 | 89.269 | 101.480 | -74.977 | 1.00 64.30 | A | C |
| ATOM | 1025 | OG  | SER | A | 304 | 87.869 | 101.574 | -75.167 | 1.00 64.30 | A | O |
| ATOM | 1026 | C   | SER | A | 304 | 89.082 | 99.248  | -73.860 | 1.00 64.30 | A | C |
| ATOM | 1027 | O   | SER | A | 304 | 89.562 | 99.273  | -72.726 | 1.00 64.30 | A | O |
| ATOM | 1028 | N   | ARG | A | 305 | 87.988 | 98.560  | -74.167 | 1.00148.97 | A | N |
| ATOM | 1029 | CA  | ARG | A | 305 | 87.278 | 97.766  | -73.173 | 1.00148.97 | A | C |
| ATOM | 1030 | CB  | ARG | A | 305 | 85.815 | 97.582  | -73.584 | 1.00148.97 | A | C |
| ATOM | 1031 | CG  | ARG | A | 305 | 84.938 | 96.955  | -72.513 | 1.00148.97 | A | C |
| ATOM | 1032 | CD  | ARG | A | 305 | 83.494 | 96.853  | -72.976 | 1.00148.97 | A | C |
| ATOM | 1033 | NE  | ARG | A | 305 | 82.623 | 96.316  | -71.935 | 1.00148.97 | A | N |
| ATOM | 1034 | CZ  | ARG | A | 305 | 81.988 | 97.061  | -71.036 | 1.00148.97 | A | C |
| ATOM | 1035 | NH1 | ARG | A | 305 | 82.126 | 98.380  | -71.048 | 1.00148.97 | A | N |
| ATOM | 1036 | NH2 | ARG | A | 305 | 81.214 | 96.488  | -70.125 | 1.00148.97 | A | N |
| ATOM | 1037 | C   | ARG | A | 305 | 87.952 | 96.410  | -72.990 | 1.00148.97 | A | C |
| ATOM | 1038 | O   | ARG | A | 305 | 87.658 | 95.680  | -72.043 | 1.00148.97 | A | O |
| ATOM | 1039 | N   | HIS | A | 306 | 88.862 | 96.083  | -73.901 | 1.00 99.22 | A | N |
| ATOM | 1040 | CA  | HIS | A | 306 | 89.583 | 94.817  | -73.845 | 1.00 99.22 | A | C |
| ATOM | 1041 | ND1 | HIS | A | 306 | 87.387 | 94.860  | -76.116 | 1.00 99.22 | A | N |
| ATOM | 1042 | CG  | HIS | A | 306 | 88.310 | 93.878  | -75.826 | 1.00 99.22 | A | C |
| ATOM | 1043 | CB  | HIS | A | 306 | 89.651 | 94.179  | -75.234 | 1.00 99.22 | A | C |
| ATOM | 1044 | NE2 | HIS | A | 306 | 86.486 | 92.998  | -76.674 | 1.00 99.22 | A | N |
| ATOM | 1045 | CD2 | HIS | A | 306 | 87.734 | 92.705  | -76.180 | 1.00 99.22 | A | C |
| ATOM | 1046 | CE1 | HIS | A | 306 | 86.302 | 94.305  | -76.624 | 1.00 99.22 | A | C |
| ATOM | 1047 | C   | HIS | A | 306 | 90.990 | 95.009  | -73.289 | 1.00 99.22 | A | C |
| ATOM | 1048 | O   | HIS | A | 306 | 91.358 | 94.403  | -72.283 | 1.00 99.22 | A | O |
| ATOM | 1049 | N   | SER | A | 307 | 91.773 | 95.854  | -73.951 | 1.00102.77 | A | N |
| ATOM | 1050 | CA  | SER | A | 307 | 93.139 | 96.129  | -73.524 | 1.00102.77 | A | C |
| ATOM | 1051 | CB  | SER | A | 307 | 94.020 | 96.464  | -74.728 | 1.00102.77 | A | C |
| ATOM | 1052 | OG  | SER | A | 307 | 94.051 | 95.389  | -75.652 | 1.00102.77 | A | O |
| ATOM | 1053 | C   | SER | A | 307 | 93.180 | 97.268  | -72.509 | 1.00102.77 | A | C |
| ATOM | 1054 | O   | SER | A | 307 | 92.289 | 98.116  | -72.477 | 1.00102.77 | A | O |
| ATOM | 1055 | N   | GLN | A | 308 | 94.221 | 97.280  | -71.684 | 1.00121.93 | A | N |
| ATOM | 1056 | CA  | GLN | A | 308 | 94.373 | 98.301  | -70.654 | 1.00121.93 | A | C |
| ATOM | 1057 | CB  | GLN | A | 308 | 94.944 | 97.686  | -69.375 | 1.00121.93 | A | C |
| ATOM | 1058 | CG  | GLN | A | 308 | 94.130 | 96.524  | -68.828 | 1.00121.93 | A | C |
| ATOM | 1059 | CD  | GLN | A | 308 | 92.730 | 96.934  | -68.415 | 1.00121.93 | A | C |
| ATOM | 1060 | OE1 | GLN | A | 308 | 92.546 | 97.904  | -67.680 | 1.00121.93 | A | O |

|      |      |     |     |   |     |        |         |         |            |   |   |
|------|------|-----|-----|---|-----|--------|---------|---------|------------|---|---|
| ATOM | 1061 | NE2 | GLN | A | 308 | 91.732 | 96.200  | -68.893 | 1.00121.93 | A | N |
| ATOM | 1062 | C   | GLN | A | 308 | 95.272 | 99.436  | -71.133 | 1.00121.93 | A | C |
| ATOM | 1063 | O   | GLN | A | 308 | 95.516 | 100.398 | -70.404 | 1.00121.93 | A | O |
| ATOM | 1064 | N   | GLY | A | 309 | 95.762 | 99.317  | -72.363 | 1.00 30.52 | A | N |
| ATOM | 1065 | CA  | GLY | A | 309 | 96.630 | 100.327 | -72.940 | 1.00 30.52 | A | C |
| ATOM | 1066 | C   | GLY | A | 309 | 95.886 | 101.594 | -73.311 | 1.00 30.52 | A | C |
| ATOM | 1067 | O   | GLY | A | 309 | 96.367 | 102.701 | -73.067 | 1.00 30.52 | A | O |
| ATOM | 1068 | N   | LEU | A | 310 | 94.709 | 101.432 | -73.906 | 1.00101.35 | A | N |
| ATOM | 1069 | CA  | LEU | A | 310 | 93.892 | 102.571 | -74.310 | 1.00101.35 | A | C |
| ATOM | 1070 | CB  | LEU | A | 310 | 92.816 | 102.136 | -75.306 | 1.00101.35 | A | C |
| ATOM | 1071 | CG  | LEU | A | 310 | 93.315 | 101.546 | -76.626 | 1.00101.35 | A | C |
| ATOM | 1072 | CD1 | LEU | A | 310 | 92.146 | 101.105 | -77.492 | 1.00101.35 | A | C |
| ATOM | 1073 | CD2 | LEU | A | 310 | 94.187 | 102.549 | -77.366 | 1.00101.35 | A | C |
| ATOM | 1074 | C   | LEU | A | 310 | 93.248 | 103.245 | -73.104 | 1.00101.35 | A | C |
| ATOM | 1075 | O   | LEU | A | 310 | 92.897 | 104.424 | -73.155 | 1.00101.35 | A | O |
| ATOM | 1076 | N   | ARG | A | 311 | 93.093 | 102.490 | -72.022 | 1.00108.34 | A | N |
| ATOM | 1077 | CA  | ARG | A | 311 | 92.520 | 103.028 | -70.794 | 1.00108.34 | A | C |
| ATOM | 1078 | CB  | ARG | A | 311 | 92.190 | 101.901 | -69.814 | 1.00108.34 | A | C |
| ATOM | 1079 | CG  | ARG | A | 311 | 91.100 | 100.957 | -70.294 | 1.00108.34 | A | C |
| ATOM | 1080 | CD  | ARG | A | 311 | 90.789 | 99.903  | -69.245 | 1.00108.34 | A | C |
| ATOM | 1081 | NE  | ARG | A | 311 | 90.407 | 100.502 | -67.969 | 1.00108.34 | A | N |
| ATOM | 1082 | CZ  | ARG | A | 311 | 89.154 | 100.768 | -67.613 | 1.00108.34 | A | C |
| ATOM | 1083 | NH1 | ARG | A | 311 | 88.155 | 100.485 | -68.437 | 1.00108.34 | A | N |
| ATOM | 1084 | NH2 | ARG | A | 311 | 88.900 | 101.314 | -66.432 | 1.00108.34 | A | N |
| ATOM | 1085 | C   | ARG | A | 311 | 93.469 | 104.029 | -70.144 | 1.00108.34 | A | C |
| ATOM | 1086 | O   | ARG | A | 311 | 93.055 | 105.112 | -69.731 | 1.00108.34 | A | O |
| ATOM | 1087 | N   | ILE | A | 312 | 94.743 | 103.659 | -70.056 | 1.00 41.79 | A | N |
| ATOM | 1088 | CA  | ILE | A | 312 | 95.752 | 104.529 | -69.466 | 1.00 41.79 | A | C |
| ATOM | 1089 | CB  | ILE | A | 312 | 97.081 | 103.784 | -69.240 | 1.00 41.79 | A | C |
| ATOM | 1090 | CG2 | ILE | A | 312 | 98.112 | 104.711 | -68.615 | 1.00 41.79 | A | C |
| ATOM | 1091 | CG1 | ILE | A | 312 | 96.860 | 102.553 | -68.360 | 1.00 41.79 | A | C |
| ATOM | 1092 | CD1 | ILE | A | 312 | 98.118 | 101.756 | -68.097 | 1.00 41.79 | A | C |
| ATOM | 1093 | C   | ILE | A | 312 | 96.004 | 105.746 | -70.350 | 1.00 41.79 | A | C |
| ATOM | 1094 | O   | ILE | A | 312 | 96.076 | 106.874 | -69.863 | 1.00 41.79 | A | O |
| ATOM | 1095 | N   | LEU | A | 313 | 96.137 | 105.508 | -71.651 | 1.00 49.07 | A | N |
| ATOM | 1096 | CA  | LEU | A | 313 | 96.363 | 106.583 | -72.609 | 1.00 49.07 | A | C |
| ATOM | 1097 | CB  | LEU | A | 313 | 96.614 | 106.009 | -74.005 | 1.00 49.07 | A | C |
| ATOM | 1098 | CG  | LEU | A | 313 | 96.877 | 107.022 | -75.121 | 1.00 49.07 | A | C |
| ATOM | 1099 | CD1 | LEU | A | 313 | 98.070 | 107.900 | -74.779 | 1.00 49.07 | A | C |
| ATOM | 1100 | CD2 | LEU | A | 313 | 97.091 | 106.316 | -76.451 | 1.00 49.07 | A | C |
| ATOM | 1101 | C   | LEU | A | 313 | 95.181 | 107.545 | -72.642 | 1.00 49.07 | A | C |
| ATOM | 1102 | O   | LEU | A | 313 | 95.353 | 108.749 | -72.828 | 1.00 49.07 | A | O |
| ATOM | 1103 | N   | GLY | A | 314 | 93.980 | 107.005 | -72.461 | 1.00 27.86 | A | N |
| ATOM | 1104 | CA  | GLY | A | 314 | 92.772 | 107.810 | -72.460 | 1.00 27.86 | A | C |
| ATOM | 1105 | C   | GLY | A | 314 | 92.700 | 108.738 | -71.263 | 1.00 27.86 | A | C |
| ATOM | 1106 | O   | GLY | A | 314 | 92.329 | 109.905 | -71.391 | 1.00 27.86 | A | O |
| ATOM | 1107 | N   | TYR | A | 315 | 93.059 | 108.217 | -70.094 | 1.00 99.30 | A | N |
| ATOM | 1108 | CA  | TYR | A | 315 | 93.045 | 109.004 | -68.867 | 1.00 99.30 | A | C |
| ATOM | 1109 | CB  | TYR | A | 315 | 93.145 | 108.092 | -67.643 | 1.00 99.30 | A | C |
| ATOM | 1110 | CG  | TYR | A | 315 | 91.990 | 107.128 | -67.504 | 1.00 99.30 | A | C |
| ATOM | 1111 | CD1 | TYR | A | 315 | 92.118 | 105.961 | -66.762 | 1.00 99.30 | A | C |
| ATOM | 1112 | CD2 | TYR | A | 315 | 90.769 | 107.385 | -68.114 | 1.00 99.30 | A | C |
| ATOM | 1113 | CE1 | TYR | A | 315 | 91.064 | 105.077 | -66.632 | 1.00 99.30 | A | C |
| ATOM | 1114 | CE2 | TYR | A | 315 | 89.710 | 106.507 | -67.990 | 1.00 99.30 | A | C |
| ATOM | 1115 | CZ  | TYR | A | 315 | 89.863 | 105.355 | -67.248 | 1.00 99.30 | A | C |
| ATOM | 1116 | OH  | TYR | A | 315 | 88.810 | 104.478 | -67.123 | 1.00 99.30 | A | O |
| ATOM | 1117 | C   | TYR | A | 315 | 94.178 | 110.024 | -68.856 | 1.00 99.30 | A | C |
| ATOM | 1118 | O   | TYR | A | 315 | 94.071 | 111.078 | -68.229 | 1.00 99.30 | A | O |
| ATOM | 1119 | N   | THR | A | 316 | 95.263 | 109.703 | -69.553 | 1.00115.27 | A | N |
| ATOM | 1120 | CA  | THR | A | 316 | 96.409 | 110.600 | -69.638 | 1.00115.27 | A | C |
| ATOM | 1121 | CB  | THR | A | 316 | 97.638 | 109.894 | -70.242 | 1.00115.27 | A | C |
| ATOM | 1122 | OG1 | THR | A | 316 | 98.015 | 108.790 | -69.410 | 1.00115.27 | A | O |
| ATOM | 1123 | CG2 | THR | A | 316 | 98.807 | 110.860 | -70.353 | 1.00115.27 | A | C |
| ATOM | 1124 | C   | THR | A | 316 | 96.078 | 111.832 | -70.472 | 1.00115.27 | A | C |
| ATOM | 1125 | O   | THR | A | 316 | 96.351 | 112.960 | -70.065 | 1.00115.27 | A | O |
| ATOM | 1126 | N   | LEU | A | 317 | 95.486 | 111.608 | -71.641 | 1.00 53.09 | A | N |
| ATOM | 1127 | CA  | LEU | A | 317 | 95.103 | 112.701 | -72.527 | 1.00 53.09 | A | C |
| ATOM | 1128 | CB  | LEU | A | 317 | 94.708 | 112.163 | -73.905 | 1.00 53.09 | A | C |

|      |      |     |     |   |     |         |         |         |      |        |   |   |
|------|------|-----|-----|---|-----|---------|---------|---------|------|--------|---|---|
| ATOM | 1129 | CG  | LEU | A | 317 | 95.793  | 111.411 | -74.679 | 1.00 | 53.09  | A | C |
| ATOM | 1130 | CD1 | LEU | A | 317 | 95.246  | 110.878 | -75.994 | 1.00 | 53.09  | A | C |
| ATOM | 1131 | CD2 | LEU | A | 317 | 97.000  | 112.305 | -74.920 | 1.00 | 53.09  | A | C |
| ATOM | 1132 | C   | LEU | A | 317 | 93.959  | 113.514 | -71.931 | 1.00 | 53.09  | A | C |
| ATOM | 1133 | O   | LEU | A | 317 | 93.804  | 114.698 | -72.229 | 1.00 | 53.09  | A | O |
| ATOM | 1134 | N   | LYS | A | 318 | 93.158  | 112.870 | -71.087 | 1.00 | 75.11  | A | N |
| ATOM | 1135 | CA  | LYS | A | 318 | 92.044  | 113.539 | -70.427 | 1.00 | 75.11  | A | C |
| ATOM | 1136 | CB  | LYS | A | 318 | 91.079  | 112.514 | -69.830 | 1.00 | 75.11  | A | C |
| ATOM | 1137 | CG  | LYS | A | 318 | 89.884  | 113.130 | -69.121 | 1.00 | 75.11  | A | C |
| ATOM | 1138 | CD  | LYS | A | 318 | 88.977  | 112.060 | -68.537 | 1.00 | 75.11  | A | C |
| ATOM | 1139 | CE  | LYS | A | 318 | 88.443  | 111.139 | -69.621 | 1.00 | 75.11  | A | C |
| ATOM | 1140 | NZ  | LYS | A | 318 | 87.558  | 110.081 | -69.060 | 1.00 | 75.11  | A | N |
| ATOM | 1141 | C   | LYS | A | 318 | 92.544  | 114.483 | -69.340 | 1.00 | 75.11  | A | C |
| ATOM | 1142 | O   | LYS | A | 318 | 92.131  | 115.641 | -69.271 | 1.00 | 75.11  | A | O |
| ATOM | 1143 | N   | SER | A | 319 | 93.435  | 113.981 | -68.491 | 1.00 | 82.79  | A | N |
| ATOM | 1144 | CA  | SER | A | 319 | 94.011  | 114.785 | -67.420 | 1.00 | 82.79  | A | C |
| ATOM | 1145 | CB  | SER | A | 319 | 94.784  | 113.900 | -66.441 | 1.00 | 82.79  | A | C |
| ATOM | 1146 | OG  | SER | A | 319 | 95.370  | 114.673 | -65.408 | 1.00 | 82.79  | A | O |
| ATOM | 1147 | C   | SER | A | 319 | 94.928  | 115.866 | -67.983 | 1.00 | 82.79  | A | C |
| ATOM | 1148 | O   | SER | A | 319 | 95.133  | 116.907 | -67.359 | 1.00 | 82.79  | A | O |
| ATOM | 1149 | N   | CYS | A | 320 | 95.476  | 115.610 | -69.166 | 1.00 | 91.34  | A | N |
| ATOM | 1150 | CA  | CYS | A | 320 | 96.364  | 116.562 | -69.823 | 1.00 | 91.34  | A | C |
| ATOM | 1151 | CB  | CYS | A | 320 | 97.605  | 115.852 | -70.367 | 1.00 | 91.34  | A | C |
| ATOM | 1152 | SG  | CYS | A | 320 | 98.604  | 115.023 | -69.109 | 1.00 | 91.34  | A | S |
| ATOM | 1153 | C   | CYS | A | 320 | 95.644  | 117.293 | -70.950 | 1.00 | 91.34  | A | C |
| ATOM | 1154 | O   | CYS | A | 320 | 96.257  | 117.673 | -71.948 | 1.00 | 91.34  | A | O |
| ATOM | 1155 | N   | ALA | A | 321 | 94.339  | 117.484 | -70.785 | 1.00 | 55.04  | A | N |
| ATOM | 1156 | CA  | ALA | A | 321 | 93.536  | 118.188 | -71.777 | 1.00 | 55.04  | A | C |
| ATOM | 1157 | CB  | ALA | A | 321 | 92.068  | 118.171 | -71.381 | 1.00 | 55.04  | A | C |
| ATOM | 1158 | C   | ALA | A | 321 | 94.025  | 119.621 | -71.950 | 1.00 | 55.04  | A | C |
| ATOM | 1159 | O   | ALA | A | 321 | 93.953  | 120.186 | -73.042 | 1.00 | 55.04  | A | O |
| ATOM | 1160 | N   | SER | A | 322 | 94.524  | 120.203 | -70.865 | 1.00 | 39.37  | A | N |
| ATOM | 1161 | CA  | SER | A | 322 | 95.061  | 121.558 | -70.899 | 1.00 | 39.37  | A | C |
| ATOM | 1162 | CB  | SER | A | 322 | 94.955  | 122.211 | -69.519 | 1.00 | 39.37  | A | C |
| ATOM | 1163 | OG  | SER | A | 322 | 93.607  | 122.282 | -69.090 | 1.00 | 39.37  | A | O |
| ATOM | 1164 | C   | SER | A | 322 | 96.511  | 121.553 | -71.368 | 1.00 | 39.37  | A | C |
| ATOM | 1165 | O   | SER | A | 322 | 96.933  | 122.430 | -72.121 | 1.00 | 39.37  | A | O |
| ATOM | 1166 | N   | GLU | A | 323 | 97.270  | 120.558 | -70.917 | 1.00 | 101.99 | A | N |
| ATOM | 1167 | CA  | GLU | A | 323 | 98.670  | 120.426 | -71.302 | 1.00 | 101.99 | A | C |
| ATOM | 1168 | CB  | GLU | A | 323 | 99.306  | 119.221 | -70.607 | 1.00 | 101.99 | A | C |
| ATOM | 1169 | CG  | GLU | A | 323 | 99.254  | 119.276 | -69.088 | 1.00 | 101.99 | A | C |
| ATOM | 1170 | CD  | GLU | A | 323 | 100.088 | 120.405 | -68.513 | 1.00 | 101.99 | A | C |
| ATOM | 1171 | OE1 | GLU | A | 323 | 100.859 | 121.028 | -69.273 | 1.00 | 101.99 | A | O |
| ATOM | 1172 | OE2 | GLU | A | 323 | 99.973  | 120.668 | -67.298 | 1.00 | 101.99 | A | O |
| ATOM | 1173 | C   | GLU | A | 323 | 98.806  | 120.288 | -72.814 | 1.00 | 101.99 | A | C |
| ATOM | 1174 | O   | GLU | A | 323 | 99.672  | 120.910 | -73.429 | 1.00 | 101.99 | A | O |
| ATOM | 1175 | N   | LEU | A | 324 | 97.945  | 119.466 | -73.406 | 1.00 | 51.45  | A | N |
| ATOM | 1176 | CA  | LEU | A | 324 | 97.946  | 119.264 | -74.849 | 1.00 | 51.45  | A | C |
| ATOM | 1177 | CB  | LEU | A | 324 | 97.036  | 118.093 | -75.225 | 1.00 | 51.45  | A | C |
| ATOM | 1178 | CG  | LEU | A | 324 | 96.972  | 117.724 | -76.709 | 1.00 | 51.45  | A | C |
| ATOM | 1179 | CD1 | LEU | A | 324 | 98.354  | 117.369 | -77.234 | 1.00 | 51.45  | A | C |
| ATOM | 1180 | CD2 | LEU | A | 324 | 95.998  | 116.578 | -76.936 | 1.00 | 51.45  | A | C |
| ATOM | 1181 | C   | LEU | A | 324 | 97.496  | 120.531 | -75.567 | 1.00 | 51.45  | A | C |
| ATOM | 1182 | O   | LEU | A | 324 | 97.869  | 120.773 | -76.715 | 1.00 | 51.45  | A | O |
| ATOM | 1183 | N   | GLY | A | 325 | 96.692  | 121.338 | -74.882 | 1.00 | 21.45  | A | N |
| ATOM | 1184 | CA  | GLY | A | 325 | 96.198  | 122.582 | -75.442 | 1.00 | 21.45  | A | C |
| ATOM | 1185 | C   | GLY | A | 325 | 97.312  | 123.567 | -75.737 | 1.00 | 21.45  | A | C |
| ATOM | 1186 | O   | GLY | A | 325 | 97.347  | 124.175 | -76.807 | 1.00 | 21.45  | A | O |
| ATOM | 1187 | N   | PHE | A | 326 | 98.225  | 123.725 | -74.784 | 1.00 | 93.89  | A | N |
| ATOM | 1188 | CA  | PHE | A | 326 | 99.354  | 124.634 | -74.948 | 1.00 | 93.89  | A | C |
| ATOM | 1189 | CB  | PHE | A | 326 | 100.044 | 124.888 | -73.605 | 1.00 | 93.89  | A | C |
| ATOM | 1190 | CG  | PHE | A | 326 | 99.210  | 125.673 | -72.632 | 1.00 | 93.89  | A | C |
| ATOM | 1191 | CD1 | PHE | A | 326 | 98.398  | 125.028 | -71.715 | 1.00 | 93.89  | A | C |
| ATOM | 1192 | CD2 | PHE | A | 326 | 99.241  | 127.058 | -72.635 | 1.00 | 93.89  | A | C |
| ATOM | 1193 | CE1 | PHE | A | 326 | 97.631  | 125.749 | -70.819 | 1.00 | 93.89  | A | C |
| ATOM | 1194 | CE2 | PHE | A | 326 | 98.476  | 127.784 | -71.741 | 1.00 | 93.89  | A | C |
| ATOM | 1195 | CZ  | PHE | A | 326 | 97.670  | 127.129 | -70.833 | 1.00 | 93.89  | A | C |
| ATOM | 1196 | C   | PHE | A | 326 | 100.358 | 124.095 | -75.962 | 1.00 | 93.89  | A | C |

|      |      |     |     |   |     |         |         |         |      |        |   |   |
|------|------|-----|-----|---|-----|---------|---------|---------|------|--------|---|---|
| ATOM | 1197 | O   | PHE | A | 326 | 101.145 | 124.852 | -76.530 | 1.00 | 93.89  | A | O |
| ATOM | 1198 | N   | LEU | A | 327 | 100.328 | 122.785 | -76.182 | 1.00 | 47.15  | A | N |
| ATOM | 1199 | CA  | LEU | A | 327 | 101.221 | 122.151 | -77.146 | 1.00 | 47.15  | A | C |
| ATOM | 1200 | CB  | LEU | A | 327 | 101.143 | 120.628 | -77.033 | 1.00 | 47.15  | A | C |
| ATOM | 1201 | CG  | LEU | A | 327 | 101.964 | 119.828 | -78.048 | 1.00 | 47.15  | A | C |
| ATOM | 1202 | CD1 | LEU | A | 327 | 103.424 | 120.252 | -78.023 | 1.00 | 47.15  | A | C |
| ATOM | 1203 | CD2 | LEU | A | 327 | 101.830 | 118.336 | -77.789 | 1.00 | 47.15  | A | C |
| ATOM | 1204 | C   | LEU | A | 327 | 100.888 | 122.591 | -78.567 | 1.00 | 47.15  | A | C |
| ATOM | 1205 | O   | LEU | A | 327 | 101.778 | 122.928 | -79.347 | 1.00 | 47.15  | A | O |
| ATOM | 1206 | N   | LEU | A | 328 | 99.601  | 122.585 | -78.897 | 1.00 | 87.13  | A | N |
| ATOM | 1207 | CA  | LEU | A | 328 | 99.147  | 123.022 | -80.211 | 1.00 | 87.13  | A | C |
| ATOM | 1208 | CB  | LEU | A | 328 | 97.778  | 122.421 | -80.542 | 1.00 | 87.13  | A | C |
| ATOM | 1209 | CG  | LEU | A | 328 | 97.718  | 120.940 | -80.931 | 1.00 | 87.13  | A | C |
| ATOM | 1210 | CD1 | LEU | A | 328 | 98.235  | 120.045 | -79.815 | 1.00 | 87.13  | A | C |
| ATOM | 1211 | CD2 | LEU | A | 328 | 96.298  | 120.551 | -81.313 | 1.00 | 87.13  | A | C |
| ATOM | 1212 | C   | LEU | A | 328 | 99.084  | 124.543 | -80.279 | 1.00 | 87.13  | A | C |
| ATOM | 1213 | O   | LEU | A | 328 | 99.178  | 125.131 | -81.357 | 1.00 | 87.13  | A | O |
| ATOM | 1214 | N   | PHE | A | 329 | 98.927  | 125.175 | -79.121 | 1.00 | 48.49  | A | N |
| ATOM | 1215 | CA  | PHE | A | 329 | 98.873  | 126.629 | -79.045 | 1.00 | 48.49  | A | C |
| ATOM | 1216 | CB  | PHE | A | 329 | 98.416  | 127.080 | -77.657 | 1.00 | 48.49  | A | C |
| ATOM | 1217 | CG  | PHE | A | 329 | 98.354  | 128.571 | -77.495 | 1.00 | 48.49  | A | C |
| ATOM | 1218 | CD1 | PHE | A | 329 | 97.215  | 129.275 | -77.853 | 1.00 | 48.49  | A | C |
| ATOM | 1219 | CD2 | PHE | A | 329 | 99.434  | 129.270 | -76.985 | 1.00 | 48.49  | A | C |
| ATOM | 1220 | CE1 | PHE | A | 329 | 97.155  | 130.648 | -77.706 | 1.00 | 48.49  | A | C |
| ATOM | 1221 | CE2 | PHE | A | 329 | 99.381  | 130.642 | -76.836 | 1.00 | 48.49  | A | C |
| ATOM | 1222 | CZ  | PHE | A | 329 | 98.240  | 131.332 | -77.197 | 1.00 | 48.49  | A | C |
| ATOM | 1223 | C   | PHE | A | 329 | 100.230 | 127.239 | -79.376 | 1.00 | 48.49  | A | C |
| ATOM | 1224 | O   | PHE | A | 329 | 100.364 | 127.989 | -80.342 | 1.00 | 48.49  | A | O |
| ATOM | 1225 | N   | SER | A | 330 | 101.234 | 126.911 | -78.568 | 1.00 | 71.43  | A | N |
| ATOM | 1226 | CA  | SER | A | 330 | 102.589 | 127.405 | -78.785 | 1.00 | 71.43  | A | C |
| ATOM | 1227 | CB  | SER | A | 330 | 103.529 | 126.885 | -77.697 | 1.00 | 71.43  | A | C |
| ATOM | 1228 | OG  | SER | A | 330 | 103.545 | 125.468 | -77.672 | 1.00 | 71.43  | A | O |
| ATOM | 1229 | C   | SER | A | 330 | 103.104 | 126.999 | -80.162 | 1.00 | 71.43  | A | C |
| ATOM | 1230 | O   | SER | A | 330 | 103.980 | 127.655 | -80.726 | 1.00 | 71.43  | A | O |
| ATOM | 1231 | N   | LEU | A | 331 | 102.556 | 125.912 | -80.697 | 1.00 | 53.19  | A | N |
| ATOM | 1232 | CA  | LEU | A | 331 | 102.923 | 125.443 | -82.027 | 1.00 | 53.19  | A | C |
| ATOM | 1233 | CB  | LEU | A | 331 | 102.387 | 124.030 | -82.265 | 1.00 | 53.19  | A | C |
| ATOM | 1234 | CG  | LEU | A | 331 | 102.626 | 123.436 | -83.655 | 1.00 | 53.19  | A | C |
| ATOM | 1235 | CD1 | LEU | A | 331 | 104.114 | 123.322 | -83.946 | 1.00 | 53.19  | A | C |
| ATOM | 1236 | CD2 | LEU | A | 331 | 101.947 | 122.082 | -83.785 | 1.00 | 53.19  | A | C |
| ATOM | 1237 | C   | LEU | A | 331 | 102.388 | 126.389 | -83.097 | 1.00 | 53.19  | A | C |
| ATOM | 1238 | O   | LEU | A | 331 | 103.154 | 126.956 | -83.875 | 1.00 | 53.19  | A | O |
| ATOM | 1239 | N   | THR | A | 332 | 101.069 | 126.554 | -83.124 | 1.00 | 103.02 | A | N |
| ATOM | 1240 | CA  | THR | A | 332 | 100.417 | 127.418 | -84.102 | 1.00 | 103.02 | A | C |
| ATOM | 1241 | CB  | THR | A | 332 | 98.903  | 127.524 | -83.839 | 1.00 | 103.02 | A | C |
| ATOM | 1242 | OG1 | THR | A | 332 | 98.318  | 126.216 | -83.868 | 1.00 | 103.02 | A | O |
| ATOM | 1243 | CG2 | THR | A | 332 | 98.236  | 128.396 | -84.891 | 1.00 | 103.02 | A | C |
| ATOM | 1244 | C   | THR | A | 332 | 101.025 | 128.818 | -84.108 | 1.00 | 103.02 | A | C |
| ATOM | 1245 | O   | THR | A | 332 | 101.196 | 129.426 | -85.165 | 1.00 | 103.02 | A | O |
| ATOM | 1246 | N   | MET | A | 333 | 101.351 | 129.322 | -82.922 | 1.00 | 112.73 | A | N |
| ATOM | 1247 | CA  | MET | A | 333 | 101.969 | 130.636 | -82.794 | 1.00 | 112.73 | A | C |
| ATOM | 1248 | CB  | MET | A | 333 | 102.252 | 130.957 | -81.325 | 1.00 | 112.73 | A | C |
| ATOM | 1249 | CG  | MET | A | 333 | 101.007 | 131.055 | -80.459 | 1.00 | 112.73 | A | C |
| ATOM | 1250 | SD  | MET | A | 333 | 99.868  | 132.332 | -81.027 | 1.00 | 112.73 | A | S |
| ATOM | 1251 | CE  | MET | A | 333 | 100.911 | 133.784 | -80.924 | 1.00 | 112.73 | A | C |
| ATOM | 1252 | C   | MET | A | 333 | 103.258 | 130.711 | -83.603 | 1.00 | 112.73 | A | C |
| ATOM | 1253 | O   | MET | A | 333 | 103.433 | 131.608 | -84.428 | 1.00 | 112.73 | A | O |
| ATOM | 1254 | N   | ALA | A | 334 | 104.156 | 129.761 | -83.365 | 1.00 | 30.08  | A | N |
| ATOM | 1255 | CA  | ALA | A | 334 | 105.433 | 129.719 | -84.067 | 1.00 | 30.08  | A | C |
| ATOM | 1256 | CB  | ALA | A | 334 | 106.330 | 128.646 | -83.469 | 1.00 | 30.08  | A | C |
| ATOM | 1257 | C   | ALA | A | 334 | 105.242 | 129.485 | -85.562 | 1.00 | 30.08  | A | C |
| ATOM | 1258 | O   | ALA | A | 334 | 106.030 | 129.961 | -86.379 | 1.00 | 30.08  | A | O |
| ATOM | 1259 | N   | ILE | A | 335 | 104.192 | 128.749 | -85.914 | 1.00 | 41.45  | A | N |
| ATOM | 1260 | CA  | ILE | A | 335 | 103.903 | 128.445 | -87.312 | 1.00 | 41.45  | A | C |
| ATOM | 1261 | CB  | ILE | A | 335 | 102.611 | 127.618 | -87.460 | 1.00 | 41.45  | A | C |
| ATOM | 1262 | CG2 | ILE | A | 335 | 102.244 | 127.462 | -88.927 | 1.00 | 41.45  | A | C |
| ATOM | 1263 | CG1 | ILE | A | 335 | 102.778 | 126.246 | -86.804 | 1.00 | 41.45  | A | C |
| ATOM | 1264 | CD1 | ILE | A | 335 | 101.549 | 125.368 | -86.902 | 1.00 | 41.45  | A | C |

|      |      |     |     |   |     |         |         |          |      |        |   |   |
|------|------|-----|-----|---|-----|---------|---------|----------|------|--------|---|---|
| ATOM | 1265 | C   | ILE | A | 335 | 103.784 | 129.712 | -88.153  | 1.00 | 41.45  | A | C |
| ATOM | 1266 | O   | ILE | A | 335 | 104.513 | 129.890 | -89.128  | 1.00 | 41.45  | A | O |
| ATOM | 1267 | N   | ILE | A | 336 | 102.864 | 130.590 | -87.767  | 1.00 | 44.55  | A | N |
| ATOM | 1268 | CA  | ILE | A | 336 | 102.629 | 131.828 | -88.502  | 1.00 | 44.55  | A | C |
| ATOM | 1269 | CB  | ILE | A | 336 | 101.437 | 132.610 | -87.917  | 1.00 | 44.55  | A | C |
| ATOM | 1270 | CG2 | ILE | A | 336 | 101.115 | 133.819 | -88.782  | 1.00 | 44.55  | A | C |
| ATOM | 1271 | CG1 | ILE | A | 336 | 100.216 | 131.696 | -87.782  | 1.00 | 44.55  | A | C |
| ATOM | 1272 | CD1 | ILE | A | 336 | 99.002  | 132.379 | -87.191  | 1.00 | 44.55  | A | C |
| ATOM | 1273 | C   | ILE | A | 336 | 103.867 | 132.721 | -88.506  | 1.00 | 44.55  | A | C |
| ATOM | 1274 | O   | ILE | A | 336 | 104.114 | 133.449 | -89.468  | 1.00 | 44.55  | A | O |
| ATOM | 1275 | N   | ILE | A | 337 | 104.645 | 132.657 | -87.430  | 1.00 | 87.94  | A | N |
| ATOM | 1276 | CA  | ILE | A | 337 | 105.846 | 133.476 | -87.300  | 1.00 | 87.94  | A | C |
| ATOM | 1277 | CB  | ILE | A | 337 | 106.490 | 133.316 | -85.910  | 1.00 | 87.94  | A | C |
| ATOM | 1278 | CG2 | ILE | A | 337 | 107.789 | 134.103 | -85.832  | 1.00 | 87.94  | A | C |
| ATOM | 1279 | CG1 | ILE | A | 337 | 105.522 | 133.771 | -84.818  | 1.00 | 87.94  | A | C |
| ATOM | 1280 | CD1 | ILE | A | 337 | 106.054 | 133.585 | -83.415  | 1.00 | 87.94  | A | C |
| ATOM | 1281 | C   | ILE | A | 337 | 106.884 | 133.143 | -88.368  | 1.00 | 87.94  | A | C |
| ATOM | 1282 | O   | ILE | A | 337 | 107.357 | 134.028 | -89.082  | 1.00 | 87.94  | A | O |
| ATOM | 1283 | N   | PHE | A | 338 | 107.235 | 131.866 | -88.472  | 1.00 | 61.40  | A | N |
| ATOM | 1284 | CA  | PHE | A | 338 | 108.255 | 131.428 | -89.419  | 1.00 | 61.40  | A | C |
| ATOM | 1285 | CB  | PHE | A | 338 | 108.860 | 130.092 | -88.983  | 1.00 | 61.40  | A | C |
| ATOM | 1286 | CG  | PHE | A | 338 | 109.606 | 130.160 | -87.680  | 1.00 | 61.40  | A | C |
| ATOM | 1287 | CD1 | PHE | A | 338 | 110.922 | 130.590 | -87.642  | 1.00 | 61.40  | A | C |
| ATOM | 1288 | CD2 | PHE | A | 338 | 108.992 | 129.791 | -86.495  | 1.00 | 61.40  | A | C |
| ATOM | 1289 | CE1 | PHE | A | 338 | 111.611 | 130.653 | -86.445  | 1.00 | 61.40  | A | C |
| ATOM | 1290 | CE2 | PHE | A | 338 | 109.676 | 129.852 | -85.295  | 1.00 | 61.40  | A | C |
| ATOM | 1291 | CZ  | PHE | A | 338 | 110.987 | 130.283 | -85.271  | 1.00 | 61.40  | A | C |
| ATOM | 1292 | C   | PHE | A | 338 | 107.717 | 131.322 | -90.843  | 1.00 | 61.40  | A | C |
| ATOM | 1293 | O   | PHE | A | 338 | 108.428 | 131.610 | -91.805  | 1.00 | 61.40  | A | O |
| ATOM | 1294 | N   | ALA | A | 339 | 106.460 | 130.910 | -90.973  | 1.00 | 38.36  | A | N |
| ATOM | 1295 | CA  | ALA | A | 339 | 105.841 | 130.745 | -92.285  | 1.00 | 38.36  | A | C |
| ATOM | 1296 | CB  | ALA | A | 339 | 104.409 | 130.252 | -92.141  | 1.00 | 38.36  | A | C |
| ATOM | 1297 | C   | ALA | A | 339 | 105.882 | 132.039 | -93.091  | 1.00 | 38.36  | A | C |
| ATOM | 1298 | O   | ALA | A | 339 | 105.876 | 132.014 | -94.322  | 1.00 | 38.36  | A | O |
| ATOM | 1299 | N   | THR | A | 340 | 105.923 | 133.168 | -92.392  | 1.00 | 117.99 | A | N |
| ATOM | 1300 | CA  | THR | A | 340 | 105.958 | 134.471 | -93.047  | 1.00 | 117.99 | A | C |
| ATOM | 1301 | CB  | THR | A | 340 | 105.281 | 135.558 | -92.187  | 1.00 | 117.99 | A | C |
| ATOM | 1302 | OG1 | THR | A | 340 | 105.902 | 135.608 | -90.897  | 1.00 | 117.99 | A | O |
| ATOM | 1303 | CG2 | THR | A | 340 | 103.799 | 135.258 | -92.019  | 1.00 | 117.99 | A | C |
| ATOM | 1304 | C   | THR | A | 340 | 107.384 | 134.903 | -93.380  | 1.00 | 117.99 | A | C |
| ATOM | 1305 | O   | THR | A | 340 | 107.699 | 135.184 | -94.536  | 1.00 | 117.99 | A | O |
| ATOM | 1306 | N   | VAL | A | 341 | 108.242 | 134.951 | -92.366  | 1.00 | 49.53  | A | N |
| ATOM | 1307 | CA  | VAL | A | 341 | 109.622 | 135.392 | -92.551  | 1.00 | 49.53  | A | C |
| ATOM | 1308 | CB  | VAL | A | 341 | 110.415 | 135.348 | -91.229  | 1.00 | 49.53  | A | C |
| ATOM | 1309 | CG1 | VAL | A | 341 | 109.806 | 136.302 | -90.213  | 1.00 | 49.53  | A | C |
| ATOM | 1310 | CG2 | VAL | A | 341 | 110.459 | 133.931 | -90.680  | 1.00 | 49.53  | A | C |
| ATOM | 1311 | C   | VAL | A | 341 | 110.353 | 134.563 | -93.606  | 1.00 | 49.53  | A | C |
| ATOM | 1312 | O   | VAL | A | 341 | 111.257 | 135.058 | -94.278  | 1.00 | 49.53  | A | O |
| ATOM | 1313 | N   | MET | A | 342 | 109.956 | 133.302 | -93.746  | 1.00 | 112.56 | A | N |
| ATOM | 1314 | CA  | MET | A | 342 | 110.565 | 132.415 | -94.730  | 1.00 | 112.56 | A | C |
| ATOM | 1315 | CB  | MET | A | 342 | 110.430 | 130.953 | -94.296  | 1.00 | 112.56 | A | C |
| ATOM | 1316 | CG  | MET | A | 342 | 111.143 | 130.621 | -92.996  | 1.00 | 112.56 | A | C |
| ATOM | 1317 | SD  | MET | A | 342 | 111.048 | 128.870 | -92.576  | 1.00 | 112.56 | A | S |
| ATOM | 1318 | CE  | MET | A | 342 | 109.275 | 128.637 | -92.481  | 1.00 | 112.56 | A | C |
| ATOM | 1319 | C   | MET | A | 342 | 109.941 | 132.611 | -96.107  | 1.00 | 112.56 | A | C |
| ATOM | 1320 | O   | MET | A | 342 | 110.560 | 132.312 | -97.128  | 1.00 | 112.56 | A | O |
| ATOM | 1321 | N   | PHE | A | 343 | 108.711 | 133.114 | -96.128  | 1.00 | 78.09  | A | N |
| ATOM | 1322 | CA  | PHE | A | 343 | 108.002 | 133.348 | -97.380  | 1.00 | 78.09  | A | C |
| ATOM | 1323 | CB  | PHE | A | 343 | 106.493 | 133.416 | -97.143  | 1.00 | 78.09  | A | C |
| ATOM | 1324 | CG  | PHE | A | 343 | 105.697 | 133.692 | -98.386  | 1.00 | 78.09  | A | C |
| ATOM | 1325 | CD1 | PHE | A | 343 | 105.380 | 132.668 | -99.262  | 1.00 | 78.09  | A | C |
| ATOM | 1326 | CD2 | PHE | A | 343 | 105.266 | 134.975 | -98.679  | 1.00 | 78.09  | A | C |
| ATOM | 1327 | CE1 | PHE | A | 343 | 104.650 | 132.918 | -100.408 | 1.00 | 78.09  | A | C |
| ATOM | 1328 | CE2 | PHE | A | 343 | 104.535 | 135.231 | -99.823  | 1.00 | 78.09  | A | C |
| ATOM | 1329 | CZ  | PHE | A | 343 | 104.226 | 134.201 | -100.688 | 1.00 | 78.09  | A | C |
| ATOM | 1330 | C   | PHE | A | 343 | 108.482 | 134.622 | -98.066  | 1.00 | 78.09  | A | C |
| ATOM | 1331 | O   | PHE | A | 343 | 108.794 | 134.616 | -99.256  | 1.00 | 78.09  | A | O |
| ATOM | 1332 | N   | TYR | A | 344 | 108.537 | 135.714 | -97.310  | 1.00 | 66.10  | A | N |

|      |      |     |     |   |     |         |         |          |      |        |   |   |
|------|------|-----|-----|---|-----|---------|---------|----------|------|--------|---|---|
| ATOM | 1333 | CA  | TYR | A | 344 | 108.977 | 136.996 | -97.851  | 1.00 | 66.10  | A | C |
| ATOM | 1334 | CB  | TYR | A | 344 | 108.696 | 138.127 | -96.859  | 1.00 | 66.10  | A | C |
| ATOM | 1335 | CG  | TYR | A | 344 | 107.232 | 138.300 | -96.521  | 1.00 | 66.10  | A | C |
| ATOM | 1336 | CD1 | TYR | A | 344 | 106.383 | 139.005 | -97.364  | 1.00 | 66.10  | A | C |
| ATOM | 1337 | CD2 | TYR | A | 344 | 106.700 | 137.764 | -95.356  | 1.00 | 66.10  | A | C |
| ATOM | 1338 | CE1 | TYR | A | 344 | 105.044 | 139.166 | -97.058  | 1.00 | 66.10  | A | C |
| ATOM | 1339 | CE2 | TYR | A | 344 | 105.364 | 137.921 | -95.042  | 1.00 | 66.10  | A | C |
| ATOM | 1340 | CZ  | TYR | A | 344 | 104.541 | 138.622 | -95.895  | 1.00 | 66.10  | A | C |
| ATOM | 1341 | OH  | TYR | A | 344 | 103.210 | 138.780 | -95.584  | 1.00 | 66.10  | A | O |
| ATOM | 1342 | C   | TYR | A | 344 | 110.459 | 136.966 | -98.210  | 1.00 | 66.10  | A | C |
| ATOM | 1343 | O   | TYR | A | 344 | 110.962 | 137.865 | -98.885  | 1.00 | 66.10  | A | O |
| ATOM | 1344 | N   | ALA | A | 345 | 111.153 | 135.928 | -97.755  | 1.00 | 55.12  | A | N |
| ATOM | 1345 | CA  | ALA | A | 345 | 112.572 | 135.765 | -98.045  | 1.00 | 55.12  | A | C |
| ATOM | 1346 | CB  | ALA | A | 345 | 113.274 | 135.076 | -96.885  | 1.00 | 55.12  | A | C |
| ATOM | 1347 | C   | ALA | A | 345 | 112.779 | 134.981 | -99.337  | 1.00 | 55.12  | A | C |
| ATOM | 1348 | O   | ALA | A | 345 | 113.843 | 135.049 | -99.952  | 1.00 | 55.12  | A | O |
| ATOM | 1349 | N   | GLU | A | 346 | 111.753 | 134.239 | -99.741  | 1.00 | 125.73 | A | N |
| ATOM | 1350 | CA  | GLU | A | 346 | 111.817 | 133.442 | -100.960 | 1.00 | 125.73 | A | C |
| ATOM | 1351 | CB  | GLU | A | 346 | 111.402 | 131.996 | -100.676 | 1.00 | 125.73 | A | C |
| ATOM | 1352 | CG  | GLU | A | 346 | 112.264 | 131.291 | -99.640  | 1.00 | 125.73 | A | C |
| ATOM | 1353 | CD  | GLU | A | 346 | 113.684 | 131.057 | -100.119 | 1.00 | 125.73 | A | C |
| ATOM | 1354 | OE1 | GLU | A | 346 | 113.945 | 131.236 | -101.328 | 1.00 | 125.73 | A | O |
| ATOM | 1355 | OE2 | GLU | A | 346 | 114.540 | 130.694 | -99.286  | 1.00 | 125.73 | A | O |
| ATOM | 1356 | C   | GLU | A | 346 | 110.933 | 134.033 | -102.053 | 1.00 | 125.73 | A | C |
| ATOM | 1357 | O   | GLU | A | 346 | 110.943 | 133.567 | -103.193 | 1.00 | 125.73 | A | O |
| ATOM | 1358 | N   | LYS | A | 347 | 110.169 | 135.061 | -101.699 | 1.00 | 138.31 | A | N |
| ATOM | 1359 | CA  | LYS | A | 347 | 109.264 | 135.707 | -102.643 | 1.00 | 138.31 | A | C |
| ATOM | 1360 | CB  | LYS | A | 347 | 108.360 | 136.708 | -101.918 | 1.00 | 138.31 | A | C |
| ATOM | 1361 | CG  | LYS | A | 347 | 107.341 | 137.391 | -102.817 | 1.00 | 138.31 | A | C |
| ATOM | 1362 | CD  | LYS | A | 347 | 106.482 | 138.370 | -102.034 | 1.00 | 138.31 | A | C |
| ATOM | 1363 | CE  | LYS | A | 347 | 105.462 | 139.051 | -102.933 | 1.00 | 138.31 | A | C |
| ATOM | 1364 | NZ  | LYS | A | 347 | 106.114 | 139.815 | -104.032 | 1.00 | 138.31 | A | N |
| ATOM | 1365 | C   | LYS | A | 347 | 110.033 | 136.406 | -103.759 | 1.00 | 138.31 | A | C |
| ATOM | 1366 | O   | LYS | A | 347 | 109.523 | 136.573 | -104.867 | 1.00 | 138.31 | A | O |
| ATOM | 1367 | N   | GLY | A | 348 | 111.264 | 136.809 | -103.461 | 1.00 | 56.79  | A | N |
| ATOM | 1368 | CA  | GLY | A | 348 | 112.101 | 137.488 | -104.434 | 1.00 | 56.79  | A | C |
| ATOM | 1369 | C   | GLY | A | 348 | 112.815 | 136.525 | -105.362 | 1.00 | 56.79  | A | C |
| ATOM | 1370 | O   | GLY | A | 348 | 113.793 | 136.888 | -106.015 | 1.00 | 56.79  | A | O |
| ATOM | 1371 | N   | SER | A | 349 | 112.324 | 135.291 | -105.419 | 1.00 | 123.99 | A | N |
| ATOM | 1372 | CA  | SER | A | 349 | 112.919 | 134.268 | -106.271 | 1.00 | 123.99 | A | C |
| ATOM | 1373 | CB  | SER | A | 349 | 113.561 | 133.171 | -105.422 | 1.00 | 123.99 | A | C |
| ATOM | 1374 | OG  | SER | A | 349 | 114.570 | 133.702 | -104.581 | 1.00 | 123.99 | A | O |
| ATOM | 1375 | C   | SER | A | 349 | 111.880 | 133.664 | -107.211 | 1.00 | 123.99 | A | C |
| ATOM | 1376 | O   | SER | A | 349 | 110.720 | 133.487 | -106.838 | 1.00 | 123.99 | A | O |
| ATOM | 1377 | N   | SER | A | 350 | 112.305 | 133.350 | -108.430 | 1.00 | 183.36 | A | N |
| ATOM | 1378 | CA  | SER | A | 350 | 111.413 | 132.770 | -109.427 | 1.00 | 183.36 | A | C |
| ATOM | 1379 | CB  | SER | A | 350 | 112.024 | 132.886 | -110.825 | 1.00 | 183.36 | A | C |
| ATOM | 1380 | OG  | SER | A | 350 | 111.172 | 132.314 | -111.803 | 1.00 | 183.36 | A | O |
| ATOM | 1381 | C   | SER | A | 350 | 111.101 | 131.312 | -109.110 | 1.00 | 183.36 | A | C |
| ATOM | 1382 | O   | SER | A | 350 | 109.965 | 130.863 | -109.264 | 1.00 | 183.36 | A | O |
| ATOM | 1383 | N   | ALA | A | 351 | 112.115 | 130.576 | -108.668 | 1.00 | 238.58 | A | N |
| ATOM | 1384 | CA  | ALA | A | 351 | 111.949 | 129.167 | -108.331 | 1.00 | 238.58 | A | C |
| ATOM | 1385 | CB  | ALA | A | 351 | 113.205 | 128.385 | -108.687 | 1.00 | 238.58 | A | C |
| ATOM | 1386 | C   | ALA | A | 351 | 111.610 | 128.990 | -106.855 | 1.00 | 238.58 | A | C |
| ATOM | 1387 | O   | ALA | A | 351 | 112.204 | 128.160 | -106.167 | 1.00 | 238.58 | A | O |
| ATOM | 1388 | N   | SER | A | 352 | 110.652 | 129.775 | -106.374 | 1.00 | 139.03 | A | N |
| ATOM | 1389 | CA  | SER | A | 352 | 110.235 | 129.710 | -104.979 | 1.00 | 139.03 | A | C |
| ATOM | 1390 | CB  | SER | A | 352 | 109.568 | 131.021 | -104.557 | 1.00 | 139.03 | A | C |
| ATOM | 1391 | OG  | SER | A | 352 | 108.421 | 131.286 | -105.346 | 1.00 | 139.03 | A | O |
| ATOM | 1392 | C   | SER | A | 352 | 109.285 | 128.541 | -104.739 | 1.00 | 139.03 | A | C |
| ATOM | 1393 | O   | SER | A | 352 | 108.341 | 128.331 | -105.500 | 1.00 | 139.03 | A | O |
| ATOM | 1394 | N   | LYS | A | 353 | 109.540 | 127.785 | -103.677 | 1.00 | 160.96 | A | N |
| ATOM | 1395 | CA  | LYS | A | 353 | 108.707 | 126.638 | -103.336 | 1.00 | 160.96 | A | C |
| ATOM | 1396 | CB  | LYS | A | 353 | 109.537 | 125.565 | -102.628 | 1.00 | 160.96 | A | C |
| ATOM | 1397 | CG  | LYS | A | 353 | 110.704 | 125.040 | -103.450 | 1.00 | 160.96 | A | C |
| ATOM | 1398 | CD  | LYS | A | 353 | 110.227 | 124.424 | -104.756 | 1.00 | 160.96 | A | C |
| ATOM | 1399 | CE  | LYS | A | 353 | 111.395 | 123.909 | -105.583 | 1.00 | 160.96 | A | C |
| ATOM | 1400 | NZ  | LYS | A | 353 | 110.945 | 123.307 | -106.868 | 1.00 | 160.96 | A | N |



|      |      |     |     |   |     |         |                 |            |   |   |
|------|------|-----|-----|---|-----|---------|-----------------|------------|---|---|
| ATOM | 1401 | C   | LYS | A | 353 | 107.529 | 127.052-102.461 | 1.00160.96 | A | C |
| ATOM | 1402 | O   | LYS | A | 353 | 106.701 | 126.223-102.085 | 1.00160.96 | A | O |
| ATOM | 1403 | N   | PHE | A | 354 | 107.461 | 128.340-102.141 | 1.00217.25 | A | N |
| ATOM | 1404 | CA  | PHE | A | 354 | 106.384 | 128.868-101.313 | 1.00217.25 | A | C |
| ATOM | 1405 | CB  | PHE | A | 354 | 106.955 | 129.659-100.135 | 1.00217.25 | A | C |
| ATOM | 1406 | CG  | PHE | A | 354 | 107.848 | 128.851 -99.238 | 1.00217.25 | A | C |
| ATOM | 1407 | CD1 | PHE | A | 354 | 107.322 | 128.148 -98.166 | 1.00217.25 | A | C |
| ATOM | 1408 | CD2 | PHE | A | 354 | 109.213 | 128.793 -99.465 | 1.00217.25 | A | C |
| ATOM | 1409 | CE1 | PHE | A | 354 | 108.141 | 127.404 -97.339 | 1.00217.25 | A | C |
| ATOM | 1410 | CE2 | PHE | A | 354 | 110.037 | 128.050 -98.641 | 1.00217.25 | A | C |
| ATOM | 1411 | CZ  | PHE | A | 354 | 109.500 | 127.355 -97.576 | 1.00217.25 | A | C |
| ATOM | 1412 | C   | PHE | A | 354 | 105.444 | 129.749-102.130 | 1.00217.25 | A | C |
| ATOM | 1413 | O   | PHE | A | 354 | 105.812 | 130.850-102.543 | 1.00217.25 | A | O |
| ATOM | 1414 | N   | THR | A | 355 | 104.231 | 129.258-102.361 | 1.00186.86 | A | N |
| ATOM | 1415 | CA  | THR | A | 355 | 103.242 | 129.997-103.135 | 1.00186.86 | A | C |
| ATOM | 1416 | CB  | THR | A | 355 | 102.179 | 129.059-103.737 | 1.00186.86 | A | C |
| ATOM | 1417 | OG1 | THR | A | 355 | 101.500 | 128.363-102.684 | 1.00186.86 | A | O |
| ATOM | 1418 | CG2 | THR | A | 355 | 102.829 | 128.048-104.671 | 1.00186.86 | A | C |
| ATOM | 1419 | C   | THR | A | 355 | 102.549 | 131.054-102.282 | 1.00186.86 | A | C |
| ATOM | 1420 | O   | THR | A | 355 | 102.373 | 132.194-102.710 | 1.00186.86 | A | O |
| ATOM | 1421 | N   | SER | A | 356 | 102.158 | 130.667-101.072 | 1.00 47.70 | A | N |
| ATOM | 1422 | CA  | SER | A | 356 | 101.484 | 131.580-100.157 | 1.00 47.70 | A | C |
| ATOM | 1423 | CB  | SER | A | 356 | 99.972  | 131.549-100.386 | 1.00 47.70 | A | C |
| ATOM | 1424 | OG  | SER | A | 356 | 99.450  | 130.249-100.175 | 1.00 47.70 | A | O |
| ATOM | 1425 | C   | SER | A | 356 | 101.802 | 131.239 -98.706 | 1.00 47.70 | A | C |
| ATOM | 1426 | O   | SER | A | 356 | 102.298 | 130.152 -98.408 | 1.00 47.70 | A | O |
| ATOM | 1427 | N   | ILE | A | 357 | 101.514 | 132.174 -97.806 | 1.00 65.52 | A | N |
| ATOM | 1428 | CA  | ILE | A | 357 | 101.754 | 131.969 -96.381 | 1.00 65.52 | A | C |
| ATOM | 1429 | CB  | ILE | A | 357 | 101.441 | 133.238 -95.558 | 1.00 65.52 | A | C |
| ATOM | 1430 | CG2 | ILE | A | 357 | 101.665 | 132.982 -94.076 | 1.00 65.52 | A | C |
| ATOM | 1431 | CG1 | ILE | A | 357 | 102.299 | 134.410 -96.039 | 1.00 65.52 | A | C |
| ATOM | 1432 | CD1 | ILE | A | 357 | 102.071 | 135.692 -95.269 | 1.00 65.52 | A | C |
| ATOM | 1433 | C   | ILE | A | 357 | 100.967 | 130.781 -95.824 | 1.00 65.52 | A | C |
| ATOM | 1434 | O   | ILE | A | 357 | 101.527 | 129.950 -95.110 | 1.00 65.52 | A | O |
| ATOM | 1435 | N   | PRO | A | 358 | 99.664  | 130.697 -96.145 | 1.00 79.94 | A | N |
| ATOM | 1436 | CA  | PRO | A | 358 | 98.869  | 129.553 -95.685 | 1.00 79.94 | A | C |
| ATOM | 1437 | CD  | PRO | A | 358 | 98.842  | 131.678 -96.876 | 1.00 79.94 | A | C |
| ATOM | 1438 | CB  | PRO | A | 358 | 97.505  | 129.793 -96.338 | 1.00 79.94 | A | C |
| ATOM | 1439 | CG  | PRO | A | 358 | 97.442  | 131.264 -96.540 | 1.00 79.94 | A | C |
| ATOM | 1440 | C   | PRO | A | 358 | 99.451  | 128.228 -96.166 | 1.00 79.94 | A | C |
| ATOM | 1441 | O   | PRO | A | 358 | 99.353  | 127.221 -95.465 | 1.00 79.94 | A | O |
| ATOM | 1442 | N   | ALA | A | 359 | 100.051 | 128.236 -97.352 | 1.00 43.14 | A | N |
| ATOM | 1443 | CA  | ALA | A | 359 | 100.651 | 127.033 -97.916 | 1.00 43.14 | A | C |
| ATOM | 1444 | CB  | ALA | A | 359 | 100.733 | 127.142 -99.430 | 1.00 43.14 | A | C |
| ATOM | 1445 | C   | ALA | A | 359 | 102.034 | 126.779 -97.323 | 1.00 43.14 | A | C |
| ATOM | 1446 | O   | ALA | A | 359 | 102.598 | 125.696 -97.481 | 1.00 43.14 | A | O |
| ATOM | 1447 | N   | ALA | A | 360 | 102.573 | 127.785 -96.643 | 1.00 50.03 | A | N |
| ATOM | 1448 | CA  | ALA | A | 360 | 103.888 | 127.674 -96.022 | 1.00 50.03 | A | C |
| ATOM | 1449 | CB  | ALA | A | 360 | 104.562 | 129.037 -95.964 | 1.00 50.03 | A | C |
| ATOM | 1450 | C   | ALA | A | 360 | 103.790 | 127.066 -94.627 | 1.00 50.03 | A | C |
| ATOM | 1451 | O   | ALA | A | 360 | 104.804 | 126.831 -93.970 | 1.00 50.03 | A | O |
| ATOM | 1452 | N   | PHE | A | 361 | 102.563 | 126.814 -94.180 | 1.00 66.36 | A | N |
| ATOM | 1453 | CA  | PHE | A | 361 | 102.331 | 126.225 -92.866 | 1.00 66.36 | A | C |
| ATOM | 1454 | CB  | PHE | A | 361 | 100.844 | 126.268 -92.509 | 1.00 66.36 | A | C |
| ATOM | 1455 | CG  | PHE | A | 361 | 100.301 | 127.658 -92.336 | 1.00 66.36 | A | C |
| ATOM | 1456 | CD1 | PHE | A | 361 | 101.155 | 128.729 -92.135 | 1.00 66.36 | A | C |
| ATOM | 1457 | CD2 | PHE | A | 361 | 98.937  | 127.893 -92.371 | 1.00 66.36 | A | C |
| ATOM | 1458 | CE1 | PHE | A | 361 | 100.660 | 130.009 -91.975 | 1.00 66.36 | A | C |
| ATOM | 1459 | CE2 | PHE | A | 361 | 98.435  | 129.170 -92.211 | 1.00 66.36 | A | C |
| ATOM | 1460 | CZ  | PHE | A | 361 | 99.298  | 130.230 -92.013 | 1.00 66.36 | A | C |
| ATOM | 1461 | C   | PHE | A | 361 | 102.839 | 124.789 -92.813 | 1.00 66.36 | A | C |
| ATOM | 1462 | O   | PHE | A | 361 | 103.306 | 124.323 -91.773 | 1.00 66.36 | A | O |
| ATOM | 1463 | N   | TRP | A | 362 | 102.743 | 124.092 -93.940 | 1.00 75.06 | A | N |
| ATOM | 1464 | CA  | TRP | A | 362 | 103.202 | 122.711 -94.032 | 1.00 75.06 | A | C |
| ATOM | 1465 | CB  | TRP | A | 362 | 102.917 | 122.143 -95.423 | 1.00 75.06 | A | C |
| ATOM | 1466 | CG  | TRP | A | 362 | 103.547 | 120.805 -95.666 | 1.00 75.06 | A | C |
| ATOM | 1467 | CD2 | TRP | A | 362 | 103.033 | 119.528 -95.267 | 1.00 75.06 | A | C |
| ATOM | 1468 | CD1 | TRP | A | 362 | 104.725 | 120.559 -96.308 | 1.00 75.06 | A | C |

|      |      |     |     |   |     |         |         |         |      |       |   |   |
|------|------|-----|-----|---|-----|---------|---------|---------|------|-------|---|---|
| ATOM | 1469 | NE1 | TRP | A | 362 | 104.976 | 119.208 | -96.337 | 1.00 | 75.06 | A | N |
| ATOM | 1470 | CE2 | TRP | A | 362 | 103.952 | 118.554 | -95.704 | 1.00 | 75.06 | A | C |
| ATOM | 1471 | CE3 | TRP | A | 362 | 101.885 | 119.115 | -94.585 | 1.00 | 75.06 | A | C |
| ATOM | 1472 | CZ2 | TRP | A | 362 | 103.759 | 117.192 | -95.480 | 1.00 | 75.06 | A | C |
| ATOM | 1473 | CZ3 | TRP | A | 362 | 101.695 | 117.763 | -94.363 | 1.00 | 75.06 | A | C |
| ATOM | 1474 | CH2 | TRP | A | 362 | 102.627 | 116.818 | -94.809 | 1.00 | 75.06 | A | C |
| ATOM | 1475 | C   | TRP | A | 362 | 104.689 | 122.599 | -93.715 | 1.00 | 75.06 | A | C |
| ATOM | 1476 | O   | TRP | A | 362 | 105.088 | 121.846 | -92.828 | 1.00 | 75.06 | A | O |
| ATOM | 1477 | N   | TYR | A | 363 | 105.503 | 123.354 | -94.447 | 1.00 | 49.06 | A | N |
| ATOM | 1478 | CA  | TYR | A | 363 | 106.949 | 123.334 | -94.255 | 1.00 | 49.06 | A | C |
| ATOM | 1479 | CB  | TYR | A | 363 | 107.628 | 124.336 | -95.191 | 1.00 | 49.06 | A | C |
| ATOM | 1480 | CG  | TYR | A | 363 | 109.115 | 124.476 | -94.956 | 1.00 | 49.06 | A | C |
| ATOM | 1481 | CD1 | TYR | A | 363 | 110.013 | 123.573 | -95.509 | 1.00 | 49.06 | A | C |
| ATOM | 1482 | CD2 | TYR | A | 363 | 109.620 | 125.511 | -94.181 | 1.00 | 49.06 | A | C |
| ATOM | 1483 | CE1 | TYR | A | 363 | 111.373 | 123.697 | -95.296 | 1.00 | 49.06 | A | C |
| ATOM | 1484 | CE2 | TYR | A | 363 | 110.978 | 125.643 | -93.962 | 1.00 | 49.06 | A | C |
| ATOM | 1485 | CZ  | TYR | A | 363 | 111.850 | 124.734 | -94.522 | 1.00 | 49.06 | A | C |
| ATOM | 1486 | OH  | TYR | A | 363 | 113.203 | 124.863 | -94.306 | 1.00 | 49.06 | A | O |
| ATOM | 1487 | C   | TYR | A | 363 | 107.333 | 123.630 | -92.809 | 1.00 | 49.06 | A | C |
| ATOM | 1488 | O   | TYR | A | 363 | 108.275 | 123.044 | -92.277 | 1.00 | 49.06 | A | O |
| ATOM | 1489 | N   | THR | A | 364 | 106.599 | 124.542 | -92.180 | 1.00 | 38.67 | A | N |
| ATOM | 1490 | CA  | THR | A | 364 | 106.878 | 124.927 | -90.802 | 1.00 | 38.67 | A | C |
| ATOM | 1491 | CB  | THR | A | 364 | 106.024 | 126.131 | -90.367 | 1.00 | 38.67 | A | C |
| ATOM | 1492 | OG1 | THR | A | 364 | 106.271 | 127.236 | -91.246 | 1.00 | 38.67 | A | O |
| ATOM | 1493 | CG2 | THR | A | 364 | 106.366 | 126.535 | -88.942 | 1.00 | 38.67 | A | C |
| ATOM | 1494 | C   | THR | A | 364 | 106.637 | 123.768 | -89.839 | 1.00 | 38.67 | A | C |
| ATOM | 1495 | O   | THR | A | 364 | 107.527 | 123.389 | -89.079 | 1.00 | 38.67 | A | O |
| ATOM | 1496 | N   | ILE | A | 365 | 105.431 | 123.212 | -89.877 | 1.00 | 87.97 | A | N |
| ATOM | 1497 | CA  | ILE | A | 365 | 105.080 | 122.085 | -89.020 | 1.00 | 87.97 | A | C |
| ATOM | 1498 | CB  | ILE | A | 365 | 103.640 | 121.603 | -89.282 | 1.00 | 87.97 | A | C |
| ATOM | 1499 | CG2 | ILE | A | 365 | 103.293 | 120.435 | -88.372 | 1.00 | 87.97 | A | C |
| ATOM | 1500 | CG1 | ILE | A | 365 | 102.648 | 122.751 | -89.087 | 1.00 | 87.97 | A | C |
| ATOM | 1501 | CD1 | ILE | A | 365 | 101.207 | 122.363 | -89.340 | 1.00 | 87.97 | A | C |
| ATOM | 1502 | C   | ILE | A | 365 | 106.040 | 120.921 | -89.236 | 1.00 | 87.97 | A | C |
| ATOM | 1503 | O   | ILE | A | 365 | 106.469 | 120.271 | -88.283 | 1.00 | 87.97 | A | O |
| ATOM | 1504 | N   | VAL | A | 366 | 106.372 | 120.667 | -90.497 | 1.00 | 48.90 | A | N |
| ATOM | 1505 | CA  | VAL | A | 366 | 107.290 | 119.592 | -90.854 | 1.00 | 48.90 | A | C |
| ATOM | 1506 | CB  | VAL | A | 366 | 107.428 | 119.458 | -92.383 | 1.00 | 48.90 | A | C |
| ATOM | 1507 | CG1 | VAL | A | 366 | 108.600 | 118.560 | -92.737 | 1.00 | 48.90 | A | C |
| ATOM | 1508 | CG2 | VAL | A | 366 | 106.136 | 118.929 | -92.989 | 1.00 | 48.90 | A | C |
| ATOM | 1509 | C   | VAL | A | 366 | 108.671 | 119.806 | -90.242 | 1.00 | 48.90 | A | C |
| ATOM | 1510 | O   | VAL | A | 366 | 109.256 | 118.886 | -89.670 | 1.00 | 48.90 | A | O |
| ATOM | 1511 | N   | THR | A | 367 | 109.185 | 121.025 | -90.362 | 1.00 | 54.03 | A | N |
| ATOM | 1512 | CA  | THR | A | 367 | 110.511 | 121.353 | -89.850 | 1.00 | 54.03 | A | C |
| ATOM | 1513 | CB  | THR | A | 367 | 110.972 | 122.742 | -90.330 | 1.00 | 54.03 | A | C |
| ATOM | 1514 | OG1 | THR | A | 367 | 110.984 | 122.778 | -91.762 | 1.00 | 54.03 | A | O |
| ATOM | 1515 | CG2 | THR | A | 367 | 112.367 | 123.050 | -89.808 | 1.00 | 54.03 | A | C |
| ATOM | 1516 | C   | THR | A | 367 | 110.558 | 121.310 | -88.325 | 1.00 | 54.03 | A | C |
| ATOM | 1517 | O   | THR | A | 367 | 111.506 | 120.786 | -87.740 | 1.00 | 54.03 | A | O |
| ATOM | 1518 | N   | MET | A | 368 | 109.531 | 121.861 | -87.688 | 1.00 | 56.02 | A | N |
| ATOM | 1519 | CA  | MET | A | 368 | 109.477 | 121.921 | -86.231 | 1.00 | 56.02 | A | C |
| ATOM | 1520 | CB  | MET | A | 368 | 108.300 | 122.785 | -85.772 | 1.00 | 56.02 | A | C |
| ATOM | 1521 | CG  | MET | A | 368 | 108.395 | 124.240 | -86.202 | 1.00 | 56.02 | A | C |
| ATOM | 1522 | SD  | MET | A | 368 | 107.034 | 125.243 | -85.576 | 1.00 | 56.02 | A | S |
| ATOM | 1523 | CE  | MET | A | 368 | 107.274 | 125.072 | -83.810 | 1.00 | 56.02 | A | C |
| ATOM | 1524 | C   | MET | A | 368 | 109.387 | 120.533 | -85.601 | 1.00 | 56.02 | A | C |
| ATOM | 1525 | O   | MET | A | 368 | 110.026 | 120.262 | -84.584 | 1.00 | 56.02 | A | O |
| ATOM | 1526 | N   | THR | A | 369 | 108.593 | 119.658 | -86.210 | 1.00 | 66.05 | A | N |
| ATOM | 1527 | CA  | THR | A | 369 | 108.411 | 118.305 | -85.696 | 1.00 | 66.05 | A | C |
| ATOM | 1528 | CB  | THR | A | 369 | 107.038 | 117.731 | -86.088 | 1.00 | 66.05 | A | C |
| ATOM | 1529 | OG1 | THR | A | 369 | 106.928 | 117.680 | -87.516 | 1.00 | 66.05 | A | O |
| ATOM | 1530 | CG2 | THR | A | 369 | 105.920 | 118.596 | -85.529 | 1.00 | 66.05 | A | C |
| ATOM | 1531 | C   | THR | A | 369 | 109.507 | 117.367 | -86.191 | 1.00 | 66.05 | A | C |
| ATOM | 1532 | O   | THR | A | 369 | 109.327 | 116.149 | -86.220 | 1.00 | 66.05 | A | O |
| ATOM | 1533 | N   | THR | A | 370 | 110.639 | 117.945 | -86.581 | 1.00 | 71.04 | A | N |
| ATOM | 1534 | CA  | THR | A | 370 | 111.794 | 117.177 | -87.040 | 1.00 | 71.04 | A | C |
| ATOM | 1535 | CB  | THR | A | 370 | 112.559 | 116.539 | -85.860 | 1.00 | 71.04 | A | C |
| ATOM | 1536 | OG1 | THR | A | 370 | 111.700 | 115.629 | -85.162 | 1.00 | 71.04 | A | O |

|      |      |     |     |   |     |         |         |          |      |        |   |   |
|------|------|-----|-----|---|-----|---------|---------|----------|------|--------|---|---|
| ATOM | 1537 | CG2 | THR | A | 370 | 113.043 | 117.613 | -84.897  | 1.00 | 71.04  | A | C |
| ATOM | 1538 | C   | THR | A | 370 | 111.422 | 116.092 | -88.049  | 1.00 | 71.04  | A | C |
| ATOM | 1539 | O   | THR | A | 370 | 111.664 | 114.907 | -87.818  | 1.00 | 71.04  | A | O |
| ATOM | 1540 | N   | LEU | A | 371 | 110.837 | 116.504 | -89.168  | 1.00 | 149.24 | A | N |
| ATOM | 1541 | CA  | LEU | A | 371 | 110.467 | 115.571 | -90.226  | 1.00 | 149.24 | A | C |
| ATOM | 1542 | CB  | LEU | A | 371 | 108.999 | 115.753 | -90.616  | 1.00 | 149.24 | A | C |
| ATOM | 1543 | CG  | LEU | A | 371 | 107.958 | 115.455 | -89.536  | 1.00 | 149.24 | A | C |
| ATOM | 1544 | CD1 | LEU | A | 371 | 106.559 | 115.775 | -90.040  | 1.00 | 149.24 | A | C |
| ATOM | 1545 | CD2 | LEU | A | 371 | 108.051 | 114.007 | -89.091  | 1.00 | 149.24 | A | C |
| ATOM | 1546 | C   | LEU | A | 371 | 111.358 | 115.747 | -91.451  | 1.00 | 149.24 | A | C |
| ATOM | 1547 | O   | LEU | A | 371 | 112.195 | 114.897 | -91.748  | 1.00 | 149.24 | A | O |
| ATOM | 1548 | N   | GLY | A | 372 | 111.168 | 116.857 | -92.158  | 1.00 | 45.54  | A | N |
| ATOM | 1549 | CA  | GLY | A | 372 | 111.956 | 117.156 | -93.339  | 1.00 | 45.54  | A | C |
| ATOM | 1550 | C   | GLY | A | 372 | 111.757 | 116.147 | -94.453  | 1.00 | 45.54  | A | C |
| ATOM | 1551 | O   | GLY | A | 372 | 112.539 | 115.207 | -94.595  | 1.00 | 45.54  | A | O |
| ATOM | 1552 | N   | TYR | A | 373 | 110.709 | 116.342 | -95.246  | 1.00 | 55.21  | A | N |
| ATOM | 1553 | CA  | TYR | A | 373 | 110.414 | 115.445 | -96.358  | 1.00 | 55.21  | A | C |
| ATOM | 1554 | CB  | TYR | A | 373 | 108.936 | 115.532 | -96.745  | 1.00 | 55.21  | A | C |
| ATOM | 1555 | CG  | TYR | A | 373 | 107.991 | 115.031 | -95.677  | 1.00 | 55.21  | A | C |
| ATOM | 1556 | CD1 | TYR | A | 373 | 107.466 | 115.895 | -94.725  | 1.00 | 55.21  | A | C |
| ATOM | 1557 | CD2 | TYR | A | 373 | 107.621 | 113.694 | -95.620  | 1.00 | 55.21  | A | C |
| ATOM | 1558 | CE1 | TYR | A | 373 | 106.601 | 115.442 | -93.747  | 1.00 | 55.21  | A | C |
| ATOM | 1559 | CE2 | TYR | A | 373 | 106.757 | 113.232 | -94.646  | 1.00 | 55.21  | A | C |
| ATOM | 1560 | CZ  | TYR | A | 373 | 106.250 | 114.109 | -93.712  | 1.00 | 55.21  | A | C |
| ATOM | 1561 | OH  | TYR | A | 373 | 105.389 | 113.651 | -92.741  | 1.00 | 55.21  | A | O |
| ATOM | 1562 | C   | TYR | A | 373 | 111.293 | 115.752 | -97.567  | 1.00 | 55.21  | A | C |
| ATOM | 1563 | O   | TYR | A | 373 | 111.930 | 114.859 | -98.126  | 1.00 | 55.21  | A | O |
| ATOM | 1564 | N   | GLY | A | 374 | 111.321 | 117.020 | -97.965  | 1.00 | 26.05  | A | N |
| ATOM | 1565 | CA  | GLY | A | 374 | 112.124 | 117.444 | -99.097  | 1.00 | 26.05  | A | C |
| ATOM | 1566 | C   | GLY | A | 374 | 111.292 | 118.041 | -100.215 | 1.00 | 26.05  | A | C |
| ATOM | 1567 | O   | GLY | A | 374 | 111.829 | 118.524 | -101.212 | 1.00 | 26.05  | A | O |
| ATOM | 1568 | N   | ASP | A | 375 | 109.973 | 118.008 | -100.049 | 1.00 | 57.71  | A | N |
| ATOM | 1569 | CA  | ASP | A | 375 | 109.062 | 118.547 | -101.052 | 1.00 | 57.71  | A | C |
| ATOM | 1570 | CB  | ASP | A | 375 | 107.624 | 118.104 | -100.770 | 1.00 | 57.71  | A | C |
| ATOM | 1571 | CG  | ASP | A | 375 | 107.091 | 118.649 | -99.458  | 1.00 | 57.71  | A | C |
| ATOM | 1572 | OD1 | ASP | A | 375 | 107.884 | 118.805 | -98.506  | 1.00 | 57.71  | A | O |
| ATOM | 1573 | OD2 | ASP | A | 375 | 105.874 | 118.921 | -99.378  | 1.00 | 57.71  | A | O |
| ATOM | 1574 | C   | ASP | A | 375 | 109.142 | 120.069 | -101.113 | 1.00 | 57.71  | A | C |
| ATOM | 1575 | O   | ASP | A | 375 | 108.852 | 120.675 | -102.145 | 1.00 | 57.71  | A | O |
| ATOM | 1576 | N   | MET | A | 376 | 109.537 | 120.681 | -100.001 | 1.00 | 56.92  | A | N |
| ATOM | 1577 | CA  | MET | A | 376 | 109.664 | 122.132 | -99.927  | 1.00 | 56.92  | A | C |
| ATOM | 1578 | CB  | MET | A | 376 | 108.438 | 122.744 | -99.246  | 1.00 | 56.92  | A | C |
| ATOM | 1579 | CG  | MET | A | 376 | 107.127 | 122.479 | -99.967  | 1.00 | 56.92  | A | C |
| ATOM | 1580 | SD  | MET | A | 376 | 105.705 | 123.176 | -99.105  | 1.00 | 56.92  | A | S |
| ATOM | 1581 | CE  | MET | A | 376 | 106.127 | 124.917 | -99.109  | 1.00 | 56.92  | A | C |
| ATOM | 1582 | C   | MET | A | 376 | 110.931 | 122.529 | -99.176  | 1.00 | 56.92  | A | C |
| ATOM | 1583 | O   | MET | A | 376 | 111.083 | 122.223 | -97.994  | 1.00 | 56.92  | A | O |
| ATOM | 1584 | N   | VAL | A | 377 | 111.838 | 123.208 | -99.870  | 1.00 | 110.24 | A | N |
| ATOM | 1585 | CA  | VAL | A | 377 | 113.092 | 123.646 | -99.265  | 1.00 | 110.24 | A | C |
| ATOM | 1586 | CB  | VAL | A | 377 | 114.248 | 122.677 | -99.590  | 1.00 | 110.24 | A | C |
| ATOM | 1587 | CG1 | VAL | A | 377 | 114.036 | 121.341 | -98.895  | 1.00 | 110.24 | A | C |
| ATOM | 1588 | CG2 | VAL | A | 377 | 114.381 | 122.490 | -101.094 | 1.00 | 110.24 | A | C |
| ATOM | 1589 | C   | VAL | A | 377 | 113.473 | 125.053 | -99.718  | 1.00 | 110.24 | A | C |
| ATOM | 1590 | O   | VAL | A | 377 | 113.329 | 125.393 | -100.892 | 1.00 | 110.24 | A | O |
| ATOM | 1591 | N   | PRO | A | 378 | 113.958 | 125.877 | -98.777  | 1.00 | 157.59 | A | N |
| ATOM | 1592 | CA  | PRO | A | 378 | 114.401 | 127.246 | -99.063  | 1.00 | 157.59 | A | C |
| ATOM | 1593 | CD  | PRO | A | 378 | 114.055 | 125.554 | -97.344  | 1.00 | 157.59 | A | C |
| ATOM | 1594 | CB  | PRO | A | 378 | 114.923 | 127.732 | -97.708  | 1.00 | 157.59 | A | C |
| ATOM | 1595 | CG  | PRO | A | 378 | 114.201 | 126.901 | -96.705  | 1.00 | 157.59 | A | C |
| ATOM | 1596 | C   | PRO | A | 378 | 115.525 | 127.270 | -100.093 | 1.00 | 157.59 | A | C |
| ATOM | 1597 | O   | PRO | A | 378 | 116.175 | 126.249 | -100.317 | 1.00 | 157.59 | A | O |
| ATOM | 1598 | N   | LYS | A | 379 | 115.750 | 128.427 | -100.708 | 1.00 | 201.84 | A | N |
| ATOM | 1599 | CA  | LYS | A | 379 | 116.792 | 128.564 | -101.719 | 1.00 | 201.84 | A | C |
| ATOM | 1600 | CB  | LYS | A | 379 | 116.171 | 128.722 | -103.109 | 1.00 | 201.84 | A | C |
| ATOM | 1601 | CG  | LYS | A | 379 | 115.270 | 127.569 | -103.522 | 1.00 | 201.84 | A | C |
| ATOM | 1602 | CD  | LYS | A | 379 | 116.031 | 126.253 | -103.554 | 1.00 | 201.84 | A | C |
| ATOM | 1603 | CE  | LYS | A | 379 | 117.164 | 126.293 | -104.566 | 1.00 | 201.84 | A | C |
| ATOM | 1604 | NZ  | LYS | A | 379 | 117.908 | 125.004 | -104.616 | 1.00 | 201.84 | A | N |

|      |      |     |     |   |     |         |         |          |            |   |   |
|------|------|-----|-----|---|-----|---------|---------|----------|------------|---|---|
| ATOM | 1605 | C   | LYS | A | 379 | 117.710 | 129.745 | -101.420 | 1.00201.84 | A | C |
| ATOM | 1606 | O   | LYS | A | 379 | 118.911 | 129.691 | -101.685 | 1.00201.84 | A | O |
| ATOM | 1607 | N   | THR | A | 380 | 117.140 | 130.810 | -100.866 | 1.00144.37 | A | N |
| ATOM | 1608 | CA  | THR | A | 380 | 117.905 | 132.011 | -100.552 | 1.00144.37 | A | C |
| ATOM | 1609 | CB  | THR | A | 380 | 117.007 | 133.262 | -100.526 | 1.00144.37 | A | C |
| ATOM | 1610 | OG1 | THR | A | 380 | 115.993 | 133.106 | -99.526  | 1.00144.37 | A | O |
| ATOM | 1611 | CG2 | THR | A | 380 | 116.349 | 133.475 | -101.881 | 1.00144.37 | A | C |
| ATOM | 1612 | C   | THR | A | 380 | 118.622 | 131.885 | -99.212  | 1.00144.37 | A | C |
| ATOM | 1613 | O   | THR | A | 380 | 118.446 | 130.903 | -98.491  | 1.00144.37 | A | O |
| ATOM | 1614 | N   | ILE | A | 381 | 119.431 | 132.888 | -98.887  | 1.00 82.77 | A | N |
| ATOM | 1615 | CA  | ILE | A | 381 | 120.174 | 132.899 | -97.632  | 1.00 82.77 | A | C |
| ATOM | 1616 | CB  | ILE | A | 381 | 121.405 | 133.828 | -97.702  | 1.00 82.77 | A | C |
| ATOM | 1617 | CG2 | ILE | A | 381 | 122.015 | 134.011 | -96.322  | 1.00 82.77 | A | C |
| ATOM | 1618 | CG1 | ILE | A | 381 | 122.452 | 133.269 | -98.669  | 1.00 82.77 | A | C |
| ATOM | 1619 | CD1 | ILE | A | 381 | 122.078 | 133.388 | -100.132 | 1.00 82.77 | A | C |
| ATOM | 1620 | C   | ILE | A | 381 | 119.279 | 133.337 | -96.476  | 1.00 82.77 | A | C |
| ATOM | 1621 | O   | ILE | A | 381 | 119.333 | 132.767 | -95.386  | 1.00 82.77 | A | O |
| ATOM | 1622 | N   | ALA | A | 382 | 118.456 | 134.351 | -96.723  | 1.00 53.32 | A | N |
| ATOM | 1623 | CA  | ALA | A | 382 | 117.537 | 134.855 | -95.709  | 1.00 53.32 | A | C |
| ATOM | 1624 | CB  | ALA | A | 382 | 116.760 | 136.048 | -96.243  | 1.00 53.32 | A | C |
| ATOM | 1625 | C   | ALA | A | 382 | 116.583 | 133.760 | -95.243  | 1.00 53.32 | A | C |
| ATOM | 1626 | O   | ALA | A | 382 | 116.256 | 133.671 | -94.060  | 1.00 53.32 | A | O |
| ATOM | 1627 | N   | GLY | A | 383 | 116.142 | 132.928 | -96.182  | 1.00 35.60 | A | N |
| ATOM | 1628 | CA  | GLY | A | 383 | 115.249 | 131.829 | -95.868  | 1.00 35.60 | A | C |
| ATOM | 1629 | C   | GLY | A | 383 | 115.982 | 130.664 | -95.232  | 1.00 35.60 | A | C |
| ATOM | 1630 | O   | GLY | A | 383 | 115.373 | 129.810 | -94.588  | 1.00 35.60 | A | O |
| ATOM | 1631 | N   | LYS | A | 384 | 117.298 | 130.631 | -95.416  | 1.00 53.39 | A | N |
| ATOM | 1632 | CA  | LYS | A | 384 | 118.125 | 129.571 | -94.853  | 1.00 53.39 | A | C |
| ATOM | 1633 | CB  | LYS | A | 384 | 119.486 | 129.526 | -95.551  | 1.00 53.39 | A | C |
| ATOM | 1634 | CG  | LYS | A | 384 | 120.437 | 128.482 | -94.991  | 1.00 53.39 | A | C |
| ATOM | 1635 | CD  | LYS | A | 384 | 121.755 | 128.474 | -95.748  | 1.00 53.39 | A | C |
| ATOM | 1636 | CE  | LYS | A | 384 | 121.543 | 128.161 | -97.220  | 1.00 53.39 | A | C |
| ATOM | 1637 | NZ  | LYS | A | 384 | 120.899 | 126.834 | -97.418  | 1.00 53.39 | A | N |
| ATOM | 1638 | C   | LYS | A | 384 | 118.312 | 129.761 | -93.352  | 1.00 53.39 | A | C |
| ATOM | 1639 | O   | LYS | A | 384 | 118.278 | 128.799 | -92.586  | 1.00 53.39 | A | O |
| ATOM | 1640 | N   | ILE | A | 385 | 118.509 | 131.009 | -92.940  | 1.00 33.52 | A | N |
| ATOM | 1641 | CA  | ILE | A | 385 | 118.691 | 131.331 | -91.530  | 1.00 33.52 | A | C |
| ATOM | 1642 | CB  | ILE | A | 385 | 119.152 | 132.788 | -91.340  | 1.00 33.52 | A | C |
| ATOM | 1643 | CG2 | ILE | A | 385 | 119.342 | 133.099 | -89.863  | 1.00 33.52 | A | C |
| ATOM | 1644 | CG1 | ILE | A | 385 | 120.445 | 133.044 | -92.117  | 1.00 33.52 | A | C |
| ATOM | 1645 | CD1 | ILE | A | 385 | 120.963 | 134.461 | -91.991  | 1.00 33.52 | A | C |
| ATOM | 1646 | C   | ILE | A | 385 | 117.400 | 131.111 | -90.749  | 1.00 33.52 | A | C |
| ATOM | 1647 | O   | ILE | A | 385 | 117.411 | 130.532 | -89.662  | 1.00 33.52 | A | O |
| ATOM | 1648 | N   | PHE | A | 386 | 116.289 | 131.574 | -91.311  | 1.00111.88 | A | N |
| ATOM | 1649 | CA  | PHE | A | 386 | 114.986 | 131.423 | -90.674  | 1.00111.88 | A | C |
| ATOM | 1650 | CB  | PHE | A | 386 | 113.926 | 132.230 | -91.426  | 1.00111.88 | A | C |
| ATOM | 1651 | CG  | PHE | A | 386 | 114.202 | 133.706 | -91.466  | 1.00111.88 | A | C |
| ATOM | 1652 | CD1 | PHE | A | 386 | 114.979 | 134.307 | -90.488  | 1.00111.88 | A | C |
| ATOM | 1653 | CD2 | PHE | A | 386 | 113.688 | 134.493 | -92.483  | 1.00111.88 | A | C |
| ATOM | 1654 | CE1 | PHE | A | 386 | 115.236 | 135.664 | -90.523  | 1.00111.88 | A | C |
| ATOM | 1655 | CE2 | PHE | A | 386 | 113.942 | 135.852 | -92.523  | 1.00111.88 | A | C |
| ATOM | 1656 | CZ  | PHE | A | 386 | 114.716 | 136.438 | -91.542  | 1.00111.88 | A | C |
| ATOM | 1657 | C   | PHE | A | 386 | 114.579 | 129.955 | -90.602  | 1.00111.88 | A | C |
| ATOM | 1658 | O   | PHE | A | 386 | 113.901 | 129.534 | -89.664  | 1.00111.88 | A | O |
| ATOM | 1659 | N   | GLY | A | 387 | 114.998 | 129.181 | -91.598  | 1.00 27.68 | A | N |
| ATOM | 1660 | CA  | GLY | A | 387 | 114.699 | 127.761 | -91.636  | 1.00 27.68 | A | C |
| ATOM | 1661 | C   | GLY | A | 387 | 115.416 | 126.999 | -90.540  | 1.00 27.68 | A | C |
| ATOM | 1662 | O   | GLY | A | 387 | 114.949 | 125.953 | -90.088  | 1.00 27.68 | A | O |
| ATOM | 1663 | N   | SER | A | 388 | 116.558 | 127.526 | -90.111  | 1.00 31.06 | A | N |
| ATOM | 1664 | CA  | SER | A | 388 | 117.338 | 126.905 | -89.048  | 1.00 31.06 | A | C |
| ATOM | 1665 | CB  | SER | A | 388 | 118.788 | 127.389 | -89.094  | 1.00 31.06 | A | C |
| ATOM | 1666 | OG  | SER | A | 388 | 119.394 | 127.069 | -90.334  | 1.00 31.06 | A | O |
| ATOM | 1667 | C   | SER | A | 388 | 116.729 | 127.202 | -87.682  | 1.00 31.06 | A | C |
| ATOM | 1668 | O   | SER | A | 388 | 116.644 | 126.322 | -86.825  | 1.00 31.06 | A | O |
| ATOM | 1669 | N   | ILE | A | 389 | 116.308 | 128.447 | -87.486  | 1.00 33.86 | A | N |
| ATOM | 1670 | CA  | ILE | A | 389 | 115.691 | 128.860 | -86.231  | 1.00 33.86 | A | C |
| ATOM | 1671 | CB  | ILE | A | 389 | 115.468 | 130.384 | -86.188  | 1.00 33.86 | A | C |
| ATOM | 1672 | CG2 | ILE | A | 389 | 114.862 | 130.798 | -84.854  | 1.00 33.86 | A | C |

|      |      |     |     |   |     |         |         |         |      |        |   |   |
|------|------|-----|-----|---|-----|---------|---------|---------|------|--------|---|---|
| ATOM | 1673 | CG1 | ILE | A | 389 | 116.784 | 131.123 | -86.438 | 1.00 | 33.86  | A | C |
| ATOM | 1674 | CD1 | ILE | A | 389 | 116.654 | 132.631 | -86.415 | 1.00 | 33.86  | A | C |
| ATOM | 1675 | C   | ILE | A | 389 | 114.357 | 128.152 | -86.026 | 1.00 | 33.86  | A | C |
| ATOM | 1676 | O   | ILE | A | 389 | 113.988 | 127.812 | -84.902 | 1.00 | 33.86  | A | O |
| ATOM | 1677 | N   | CYS | A | 390 | 113.638 | 127.931 | -87.122 | 1.00 | 36.22  | A | N |
| ATOM | 1678 | CA  | CYS | A | 390 | 112.348 | 127.253 | -87.072 | 1.00 | 36.22  | A | C |
| ATOM | 1679 | CB  | CYS | A | 390 | 111.686 | 127.261 | -88.451 | 1.00 | 36.22  | A | C |
| ATOM | 1680 | SG  | CYS | A | 390 | 110.077 | 126.439 | -88.513 | 1.00 | 36.22  | A | S |
| ATOM | 1681 | C   | CYS | A | 390 | 112.500 | 125.820 | -86.573 | 1.00 | 36.22  | A | C |
| ATOM | 1682 | O   | CYS | A | 390 | 111.605 | 125.280 | -85.923 | 1.00 | 36.22  | A | O |
| ATOM | 1683 | N   | SER | A | 391 | 113.639 | 125.210 | -86.883 | 1.00 | 67.70  | A | N |
| ATOM | 1684 | CA  | SER | A | 391 | 113.915 | 123.842 | -86.461 | 1.00 | 67.70  | A | C |
| ATOM | 1685 | CB  | SER | A | 391 | 114.992 | 123.215 | -87.348 | 1.00 | 67.70  | A | C |
| ATOM | 1686 | OG  | SER | A | 391 | 115.258 | 121.879 | -86.956 | 1.00 | 67.70  | A | O |
| ATOM | 1687 | C   | SER | A | 391 | 114.346 | 123.796 | -84.999 | 1.00 | 67.70  | A | C |
| ATOM | 1688 | O   | SER | A | 391 | 113.977 | 122.882 | -84.261 | 1.00 | 67.70  | A | O |
| ATOM | 1689 | N   | LEU | A | 392 | 115.128 | 124.788 | -84.586 | 1.00 | 41.51  | A | N |
| ATOM | 1690 | CA  | LEU | A | 392 | 115.595 | 124.871 | -83.208 | 1.00 | 41.51  | A | C |
| ATOM | 1691 | CB  | LEU | A | 392 | 116.655 | 125.965 | -83.065 | 1.00 | 41.51  | A | C |
| ATOM | 1692 | CG  | LEU | A | 392 | 117.925 | 125.787 | -83.897 | 1.00 | 41.51  | A | C |
| ATOM | 1693 | CD1 | LEU | A | 392 | 118.869 | 126.963 | -83.699 | 1.00 | 41.51  | A | C |
| ATOM | 1694 | CD2 | LEU | A | 392 | 118.614 | 124.477 | -83.547 | 1.00 | 41.51  | A | C |
| ATOM | 1695 | C   | LEU | A | 392 | 114.433 | 125.138 | -82.257 | 1.00 | 41.51  | A | C |
| ATOM | 1696 | O   | LEU | A | 392 | 114.282 | 124.461 | -81.240 | 1.00 | 41.51  | A | O |
| ATOM | 1697 | N   | SER | A | 393 | 113.616 | 126.129 | -82.597 | 1.00 | 31.53  | A | N |
| ATOM | 1698 | CA  | SER | A | 393 | 112.448 | 126.467 | -81.794 | 1.00 | 31.53  | A | C |
| ATOM | 1699 | CB  | SER | A | 393 | 111.796 | 127.751 | -82.310 | 1.00 | 31.53  | A | C |
| ATOM | 1700 | OG  | SER | A | 393 | 112.698 | 128.842 | -82.249 | 1.00 | 31.53  | A | O |
| ATOM | 1701 | C   | SER | A | 393 | 111.438 | 125.325 | -81.806 | 1.00 | 31.53  | A | C |
| ATOM | 1702 | O   | SER | A | 393 | 110.700 | 125.126 | -80.842 | 1.00 | 31.53  | A | O |
| ATOM | 1703 | N   | GLY | A | 394 | 111.414 | 124.577 | -82.904 | 1.00 | 30.12  | A | N |
| ATOM | 1704 | CA  | GLY | A | 394 | 110.513 | 123.448 | -83.039 | 1.00 | 30.12  | A | C |
| ATOM | 1705 | C   | GLY | A | 394 | 110.764 | 122.384 | -81.990 | 1.00 | 30.12  | A | C |
| ATOM | 1706 | O   | GLY | A | 394 | 109.826 | 121.826 | -81.420 | 1.00 | 30.12  | A | O |
| ATOM | 1707 | N   | VAL | A | 395 | 112.038 | 122.102 | -81.734 | 1.00 | 95.83  | A | N |
| ATOM | 1708 | CA  | VAL | A | 395 | 112.416 | 121.111 | -80.734 | 1.00 | 95.83  | A | C |
| ATOM | 1709 | CB  | VAL | A | 395 | 113.920 | 120.782 | -80.806 | 1.00 | 95.83  | A | C |
| ATOM | 1710 | CG1 | VAL | A | 395 | 114.294 | 119.770 | -79.734 | 1.00 | 95.83  | A | C |
| ATOM | 1711 | CG2 | VAL | A | 395 | 114.282 | 120.261 | -82.189 | 1.00 | 95.83  | A | C |
| ATOM | 1712 | C   | VAL | A | 395 | 112.074 | 121.599 | -79.331 | 1.00 | 95.83  | A | C |
| ATOM | 1713 | O   | VAL | A | 395 | 111.607 | 120.829 | -78.492 | 1.00 | 95.83  | A | O |
| ATOM | 1714 | N   | LEU | A | 396 | 112.304 | 122.884 | -79.084 | 1.00 | 88.54  | A | N |
| ATOM | 1715 | CA  | LEU | A | 396 | 112.026 | 123.480 | -77.783 | 1.00 | 88.54  | A | C |
| ATOM | 1716 | CB  | LEU | A | 396 | 112.570 | 124.909 | -77.722 | 1.00 | 88.54  | A | C |
| ATOM | 1717 | CG  | LEU | A | 396 | 114.078 | 125.082 | -77.912 | 1.00 | 88.54  | A | C |
| ATOM | 1718 | CD1 | LEU | A | 396 | 114.442 | 126.556 | -78.010 | 1.00 | 88.54  | A | C |
| ATOM | 1719 | CD2 | LEU | A | 396 | 114.843 | 124.412 | -76.782 | 1.00 | 88.54  | A | C |
| ATOM | 1720 | C   | LEU | A | 396 | 110.532 | 123.481 | -77.476 | 1.00 | 88.54  | A | C |
| ATOM | 1721 | O   | LEU | A | 396 | 110.094 | 122.920 | -76.472 | 1.00 | 88.54  | A | O |
| ATOM | 1722 | N   | VAL | A | 397 | 109.757 | 124.115 | -78.351 | 1.00 | 41.21  | A | N |
| ATOM | 1723 | CA  | VAL | A | 397 | 108.315 | 124.245 | -78.163 | 1.00 | 41.21  | A | C |
| ATOM | 1724 | CB  | VAL | A | 397 | 107.643 | 124.884 | -79.396 | 1.00 | 41.21  | A | C |
| ATOM | 1725 | CG1 | VAL | A | 397 | 106.129 | 124.812 | -79.275 | 1.00 | 41.21  | A | C |
| ATOM | 1726 | CG2 | VAL | A | 397 | 108.106 | 126.323 | -79.567 | 1.00 | 41.21  | A | C |
| ATOM | 1727 | C   | VAL | A | 397 | 107.637 | 122.911 | -77.861 | 1.00 | 41.21  | A | C |
| ATOM | 1728 | O   | VAL | A | 397 | 106.803 | 122.820 | -76.960 | 1.00 | 41.21  | A | O |
| ATOM | 1729 | N   | ILE | A | 398 | 107.999 | 121.879 | -78.615 | 1.00 | 120.02 | A | N |
| ATOM | 1730 | CA  | ILE | A | 398 | 107.383 | 120.566 | -78.458 | 1.00 | 120.02 | A | C |
| ATOM | 1731 | CB  | ILE | A | 398 | 107.651 | 119.665 | -79.681 | 1.00 | 120.02 | A | C |
| ATOM | 1732 | CG2 | ILE | A | 398 | 107.038 | 118.289 | -79.474 | 1.00 | 120.02 | A | C |
| ATOM | 1733 | CG1 | ILE | A | 398 | 107.097 | 120.312 | -80.951 | 1.00 | 120.02 | A | C |
| ATOM | 1734 | CD1 | ILE | A | 398 | 107.326 | 119.494 | -82.203 | 1.00 | 120.02 | A | C |
| ATOM | 1735 | C   | ILE | A | 398 | 107.856 | 119.851 | -77.194 | 1.00 | 120.02 | A | C |
| ATOM | 1736 | O   | ILE | A | 398 | 107.070 | 119.189 | -76.517 | 1.00 | 120.02 | A | O |
| ATOM | 1737 | N   | ALA | A | 399 | 109.138 | 119.992 | -76.877 | 1.00 | 64.31  | A | N |
| ATOM | 1738 | CA  | ALA | A | 399 | 109.727 | 119.286 | -75.743 | 1.00 | 64.31  | A | C |
| ATOM | 1739 | CB  | ALA | A | 399 | 111.237 | 119.171 | -75.916 | 1.00 | 64.31  | A | C |
| ATOM | 1740 | C   | ALA | A | 399 | 109.393 | 119.931 | -74.399 | 1.00 | 64.31  | A | C |

|      |      |     |     |   |     |         |         |         |      |        |   |   |
|------|------|-----|-----|---|-----|---------|---------|---------|------|--------|---|---|
| ATOM | 1741 | O   | ALA | A | 399 | 110.087 | 119.704 | -73.408 | 1.00 | 64.31  | A | O |
| ATOM | 1742 | N   | LEU | A | 400 | 108.331 | 120.730 | -74.365 | 1.00 | 75.94  | A | N |
| ATOM | 1743 | CA  | LEU | A | 400 | 107.913 | 121.382 | -73.126 | 1.00 | 75.94  | A | C |
| ATOM | 1744 | CB  | LEU | A | 400 | 107.742 | 122.892 | -73.327 | 1.00 | 75.94  | A | C |
| ATOM | 1745 | CG  | LEU | A | 400 | 108.996 | 123.682 | -73.705 | 1.00 | 75.94  | A | C |
| ATOM | 1746 | CD1 | LEU | A | 400 | 108.654 | 125.142 | -73.961 | 1.00 | 75.94  | A | C |
| ATOM | 1747 | CD2 | LEU | A | 400 | 110.059 | 123.558 | -72.625 | 1.00 | 75.94  | A | C |
| ATOM | 1748 | C   | LEU | A | 400 | 106.641 | 120.767 | -72.536 | 1.00 | 75.94  | A | C |
| ATOM | 1749 | O   | LEU | A | 400 | 106.628 | 120.372 | -71.371 | 1.00 | 75.94  | A | O |
| ATOM | 1750 | N   | PRO | A | 401 | 105.564 | 120.688 | -73.337 | 1.00 | 77.22  | A | N |
| ATOM | 1751 | CA  | PRO | A | 401 | 104.320 | 120.092 | -72.837 | 1.00 | 77.22  | A | C |
| ATOM | 1752 | CD  | PRO | A | 401 | 105.395 | 121.242 | -74.690 | 1.00 | 77.22  | A | C |
| ATOM | 1753 | CB  | PRO | A | 401 | 103.302 | 120.429 | -73.936 | 1.00 | 77.22  | A | C |
| ATOM | 1754 | CG  | PRO | A | 401 | 103.933 | 121.524 | -74.740 | 1.00 | 77.22  | A | C |
| ATOM | 1755 | C   | PRO | A | 401 | 104.436 | 118.579 | -72.688 | 1.00 | 77.22  | A | C |
| ATOM | 1756 | O   | PRO | A | 401 | 103.769 | 117.992 | -71.836 | 1.00 | 77.22  | A | O |
| ATOM | 1757 | N   | VAL | A | 402 | 105.276 | 117.961 | -73.512 | 1.00 | 140.00 | A | N |
| ATOM | 1758 | CA  | VAL | A | 402 | 105.438 | 116.510 | -73.499 | 1.00 | 140.00 | A | C |
| ATOM | 1759 | CB  | VAL | A | 402 | 106.412 | 116.030 | -74.598 | 1.00 | 140.00 | A | C |
| ATOM | 1760 | CG1 | VAL | A | 402 | 106.646 | 114.532 | -74.482 | 1.00 | 140.00 | A | C |
| ATOM | 1761 | CG2 | VAL | A | 402 | 105.876 | 116.388 | -75.974 | 1.00 | 140.00 | A | C |
| ATOM | 1762 | C   | VAL | A | 402 | 105.885 | 115.967 | -72.138 | 1.00 | 140.00 | A | C |
| ATOM | 1763 | O   | VAL | A | 402 | 105.234 | 115.081 | -71.585 | 1.00 | 140.00 | A | O |
| ATOM | 1764 | N   | PRO | A | 403 | 106.995 | 116.495 | -71.594 | 1.00 | 65.75  | A | N |
| ATOM | 1765 | CA  | PRO | A | 403 | 107.503 | 115.998 | -70.310 | 1.00 | 65.75  | A | C |
| ATOM | 1766 | CD  | PRO | A | 403 | 107.844 | 117.570 | -72.138 | 1.00 | 65.75  | A | C |
| ATOM | 1767 | CB  | PRO | A | 403 | 108.591 | 117.012 | -69.954 | 1.00 | 65.75  | A | C |
| ATOM | 1768 | CG  | PRO | A | 403 | 109.066 | 117.514 | -71.267 | 1.00 | 65.75  | A | C |
| ATOM | 1769 | C   | PRO | A | 403 | 106.430 | 115.977 | -69.226 | 1.00 | 65.75  | A | C |
| ATOM | 1770 | O   | PRO | A | 403 | 106.399 | 115.055 | -68.411 | 1.00 | 65.75  | A | O |
| ATOM | 1771 | N   | VAL | A | 404 | 105.562 | 116.984 | -69.220 | 1.00 | 38.19  | A | N |
| ATOM | 1772 | CA  | VAL | A | 404 | 104.489 | 117.061 | -68.236 | 1.00 | 38.19  | A | C |
| ATOM | 1773 | CB  | VAL | A | 404 | 103.749 | 118.410 | -68.312 | 1.00 | 38.19  | A | C |
| ATOM | 1774 | CG1 | VAL | A | 404 | 102.627 | 118.458 | -67.287 | 1.00 | 38.19  | A | C |
| ATOM | 1775 | CG2 | VAL | A | 404 | 104.722 | 119.559 | -68.100 | 1.00 | 38.19  | A | C |
| ATOM | 1776 | C   | VAL | A | 404 | 103.488 | 115.928 | -68.433 | 1.00 | 38.19  | A | C |
| ATOM | 1777 | O   | VAL | A | 404 | 103.054 | 115.294 | -67.471 | 1.00 | 38.19  | A | O |
| ATOM | 1778 | N   | ILE | A | 405 | 103.127 | 115.677 | -69.687 | 1.00 | 45.11  | A | N |
| ATOM | 1779 | CA  | ILE | A | 405 | 102.197 | 114.605 | -70.019 | 1.00 | 45.11  | A | C |
| ATOM | 1780 | CB  | ILE | A | 405 | 101.797 | 114.651 | -71.506 | 1.00 | 45.11  | A | C |
| ATOM | 1781 | CG2 | ILE | A | 405 | 100.802 | 113.548 | -71.828 | 1.00 | 45.11  | A | C |
| ATOM | 1782 | CG1 | ILE | A | 405 | 101.216 | 116.021 | -71.860 | 1.00 | 45.11  | A | C |
| ATOM | 1783 | CD1 | ILE | A | 405 | 100.793 | 116.152 | -73.308 | 1.00 | 45.11  | A | C |
| ATOM | 1784 | C   | ILE | A | 405 | 102.806 | 113.243 | -69.702 | 1.00 | 45.11  | A | C |
| ATOM | 1785 | O   | ILE | A | 405 | 102.099 | 112.306 | -69.329 | 1.00 | 45.11  | A | O |
| ATOM | 1786 | N   | VAL | A | 406 | 104.123 | 113.143 | -69.850 | 1.00 | 96.58  | A | N |
| ATOM | 1787 | CA  | VAL | A | 406 | 104.835 | 111.900 | -69.578 | 1.00 | 96.58  | A | C |
| ATOM | 1788 | CB  | VAL | A | 406 | 106.315 | 111.995 | -69.994 | 1.00 | 96.58  | A | C |
| ATOM | 1789 | CG1 | VAL | A | 406 | 107.058 | 110.727 | -69.605 | 1.00 | 96.58  | A | C |
| ATOM | 1790 | CG2 | VAL | A | 406 | 106.431 | 112.252 | -71.488 | 1.00 | 96.58  | A | C |
| ATOM | 1791 | C   | VAL | A | 406 | 104.756 | 111.527 | -68.101 | 1.00 | 96.58  | A | C |
| ATOM | 1792 | O   | VAL | A | 406 | 104.487 | 110.377 | -67.755 | 1.00 | 96.58  | A | O |
| ATOM | 1793 | N   | SER | A | 407 | 104.993 | 112.507 | -67.235 | 1.00 | 31.59  | A | N |
| ATOM | 1794 | CA  | SER | A | 407 | 104.954 | 112.287 | -65.794 | 1.00 | 31.59  | A | C |
| ATOM | 1795 | CB  | SER | A | 407 | 105.278 | 113.581 | -65.046 | 1.00 | 31.59  | A | C |
| ATOM | 1796 | OG  | SER | A | 407 | 105.264 | 113.378 | -63.644 | 1.00 | 31.59  | A | O |
| ATOM | 1797 | C   | SER | A | 407 | 103.595 | 111.753 | -65.354 | 1.00 | 31.59  | A | C |
| ATOM | 1798 | O   | SER | A | 407 | 103.507 | 110.924 | -64.447 | 1.00 | 31.59  | A | O |
| ATOM | 1799 | N   | ASN | A | 408 | 102.538 | 112.233 | -66.000 | 1.00 | 49.82  | A | N |
| ATOM | 1800 | CA  | ASN | A | 408 | 101.183 | 111.794 | -65.688 | 1.00 | 49.82  | A | C |
| ATOM | 1801 | CB  | ASN | A | 408 | 100.161 | 112.833 | -66.154 | 1.00 | 49.82  | A | C |
| ATOM | 1802 | CG  | ASN | A | 408 | 100.349 | 114.177 | -65.479 | 1.00 | 49.82  | A | C |
| ATOM | 1803 | OD1 | ASN | A | 408 | 100.794 | 114.252 | -64.333 | 1.00 | 49.82  | A | O |
| ATOM | 1804 | ND2 | ASN | A | 408 | 100.012 | 115.248 | -66.187 | 1.00 | 49.82  | A | N |
| ATOM | 1805 | C   | ASN | A | 408 | 100.869 | 110.434 | -66.300 | 1.00 | 49.82  | A | C |
| ATOM | 1806 | O   | ASN | A | 408 | 100.082 | 109.662 | -65.753 | 1.00 | 49.82  | A | O |
| ATOM | 1807 | N   | PHE | A | 409 | 101.492 | 110.146 | -67.439 | 1.00 | 43.30  | A | N |
| ATOM | 1808 | CA  | PHE | A | 409 | 101.297 | 108.870 | -68.118 | 1.00 | 43.30  | A | C |

|      |      |     |     |   |     |         |         |         |      |        |   |   |
|------|------|-----|-----|---|-----|---------|---------|---------|------|--------|---|---|
| ATOM | 1809 | CB  | PHE | A | 409 | 101.911 | 108.910 | -69.519 | 1.00 | 43.30  | A | C |
| ATOM | 1810 | CG  | PHE | A | 409 | 101.763 | 107.625 | -70.283 | 1.00 | 43.30  | A | C |
| ATOM | 1811 | CD1 | PHE | A | 409 | 100.619 | 107.370 | -71.021 | 1.00 | 43.30  | A | C |
| ATOM | 1812 | CD2 | PHE | A | 409 | 102.769 | 106.673 | -70.267 | 1.00 | 43.30  | A | C |
| ATOM | 1813 | CE1 | PHE | A | 409 | 100.480 | 106.190 | -71.727 | 1.00 | 43.30  | A | C |
| ATOM | 1814 | CE2 | PHE | A | 409 | 102.636 | 105.490 | -70.969 | 1.00 | 43.30  | A | C |
| ATOM | 1815 | CZ  | PHE | A | 409 | 101.490 | 105.249 | -71.700 | 1.00 | 43.30  | A | C |
| ATOM | 1816 | C   | PHE | A | 409 | 101.899 | 107.725 | -67.311 | 1.00 | 43.30  | A | C |
| ATOM | 1817 | O   | PHE | A | 409 | 101.284 | 106.669 | -67.161 | 1.00 | 43.30  | A | O |
| ATOM | 1818 | N   | SER | A | 410 | 103.104 | 107.941 | -66.793 | 1.00 | 71.88  | A | N |
| ATOM | 1819 | CA  | SER | A | 410 | 103.779 | 106.935 | -65.983 | 1.00 | 71.88  | A | C |
| ATOM | 1820 | CB  | SER | A | 410 | 105.254 | 107.297 | -65.795 | 1.00 | 71.88  | A | C |
| ATOM | 1821 | OG  | SER | A | 410 | 105.923 | 107.374 | -67.042 | 1.00 | 71.88  | A | O |
| ATOM | 1822 | C   | SER | A | 410 | 103.099 | 106.786 | -64.626 | 1.00 | 71.88  | A | C |
| ATOM | 1823 | O   | SER | A | 410 | 103.179 | 105.734 | -63.992 | 1.00 | 71.88  | A | O |
| ATOM | 1824 | N   | ARG | A | 411 | 102.430 | 107.847 | -64.188 | 1.00 | 148.46 | A | N |
| ATOM | 1825 | CA  | ARG | A | 411 | 101.719 | 107.835 | -62.915 | 1.00 | 148.46 | A | C |
| ATOM | 1826 | CB  | ARG | A | 411 | 101.294 | 109.252 | -62.527 | 1.00 | 148.46 | A | C |
| ATOM | 1827 | CG  | ARG | A | 411 | 100.520 | 109.334 | -61.222 | 1.00 | 148.46 | A | C |
| ATOM | 1828 | CD  | ARG | A | 411 | 100.116 | 110.766 | -60.909 | 1.00 | 148.46 | A | C |
| ATOM | 1829 | NE  | ARG | A | 411 | 99.356  | 110.862 | -59.666 | 1.00 | 148.46 | A | N |
| ATOM | 1830 | CZ  | ARG | A | 411 | 98.032  | 110.770 | -59.591 | 1.00 | 148.46 | A | C |
| ATOM | 1831 | NH1 | ARG | A | 411 | 97.316  | 110.578 | -60.690 | 1.00 | 148.46 | A | N |
| ATOM | 1832 | NH2 | ARG | A | 411 | 97.424  | 110.869 | -58.417 | 1.00 | 148.46 | A | N |
| ATOM | 1833 | C   | ARG | A | 411 | 100.500 | 106.922 | -62.980 | 1.00 | 148.46 | A | C |
| ATOM | 1834 | O   | ARG | A | 411 | 100.287 | 106.089 | -62.099 | 1.00 | 148.46 | A | O |
| ATOM | 1835 | N   | ILE | A | 412 | 99.702  | 107.085 | -64.031 | 1.00 | 95.71  | A | N |
| ATOM | 1836 | CA  | ILE | A | 412 | 98.509  | 106.269 | -64.224 | 1.00 | 95.71  | A | C |
| ATOM | 1837 | CB  | ILE | A | 412 | 97.635  | 106.812 | -65.371 | 1.00 | 95.71  | A | C |
| ATOM | 1838 | CG2 | ILE | A | 412 | 96.381  | 105.967 | -65.534 | 1.00 | 95.71  | A | C |
| ATOM | 1839 | CG1 | ILE | A | 412 | 97.270  | 108.276 | -65.117 | 1.00 | 95.71  | A | C |
| ATOM | 1840 | CD1 | ILE | A | 412 | 96.490  | 108.499 | -63.840 | 1.00 | 95.71  | A | C |
| ATOM | 1841 | C   | ILE | A | 412 | 98.881  | 104.820 | -64.521 | 1.00 | 95.71  | A | C |
| ATOM | 1842 | O   | ILE | A | 412 | 98.198  | 103.892 | -64.088 | 1.00 | 95.71  | A | O |
| ATOM | 1843 | N   | TYR | A | 413 | 99.970  | 104.635 | -65.260 | 1.00 | 110.37 | A | N |
| ATOM | 1844 | CA  | TYR | A | 413 | 100.435 | 103.301 | -65.618 | 1.00 | 110.37 | A | C |
| ATOM | 1845 | CB  | TYR | A | 413 | 101.614 | 103.388 | -66.589 | 1.00 | 110.37 | A | C |
| ATOM | 1846 | CG  | TYR | A | 413 | 102.116 | 102.045 | -67.070 | 1.00 | 110.37 | A | C |
| ATOM | 1847 | CD1 | TYR | A | 413 | 101.607 | 101.466 | -68.225 | 1.00 | 110.37 | A | C |
| ATOM | 1848 | CD2 | TYR | A | 413 | 103.098 | 101.357 | -66.370 | 1.00 | 110.37 | A | C |
| ATOM | 1849 | CE1 | TYR | A | 413 | 102.062 | 100.239 | -68.669 | 1.00 | 110.37 | A | C |
| ATOM | 1850 | CE2 | TYR | A | 413 | 103.559 | 100.129 | -66.806 | 1.00 | 110.37 | A | C |
| ATOM | 1851 | CZ  | TYR | A | 413 | 103.038 | 99.575  | -67.956 | 1.00 | 110.37 | A | C |
| ATOM | 1852 | OH  | TYR | A | 413 | 103.495 | 98.353  | -68.393 | 1.00 | 110.37 | A | O |
| ATOM | 1853 | C   | TYR | A | 413 | 100.833 | 102.505 | -64.379 | 1.00 | 110.37 | A | C |
| ATOM | 1854 | O   | TYR | A | 413 | 100.413 | 101.361 | -64.204 | 1.00 | 110.37 | A | O |
| ATOM | 1855 | N   | HIS | A | 414 | 101.643 | 103.119 | -63.523 | 1.00 | 72.45  | A | N |
| ATOM | 1856 | CA  | HIS | A | 414 | 102.100 | 102.469 | -62.299 | 1.00 | 72.45  | A | C |
| ATOM | 1857 | ND1 | HIS | A | 414 | 104.729 | 102.879 | -63.750 | 1.00 | 72.45  | A | N |
| ATOM | 1858 | CG  | HIS | A | 414 | 104.458 | 103.377 | -62.520 | 1.00 | 72.45  | A | C |
| ATOM | 1859 | CB  | HIS | A | 414 | 103.238 | 103.267 | -61.659 | 1.00 | 72.45  | A | C |
| ATOM | 1860 | NE2 | HIS | A | 414 | 106.495 | 103.997 | -63.085 | 1.00 | 72.45  | A | N |
| ATOM | 1861 | CD2 | HIS | A | 414 | 105.583 | 104.071 | -62.131 | 1.00 | 72.45  | A | C |
| ATOM | 1862 | CE1 | HIS | A | 414 | 106.002 | 103.279 | -64.078 | 1.00 | 72.45  | A | C |
| ATOM | 1863 | C   | HIS | A | 414 | 100.956 | 102.294 | -61.306 | 1.00 | 72.45  | A | C |
| ATOM | 1864 | O   | HIS | A | 414 | 101.003 | 101.423 | -60.437 | 1.00 | 72.45  | A | O |
| ATOM | 1865 | N   | GLN | A | 415 | 99.930  | 103.128 | -61.440 | 1.00 | 74.19  | A | N |
| ATOM | 1866 | CA  | GLN | A | 415 | 98.768  | 103.060 | -60.563 | 1.00 | 74.19  | A | C |
| ATOM | 1867 | CB  | GLN | A | 415 | 97.916  | 104.323 | -60.702 | 1.00 | 74.19  | A | C |
| ATOM | 1868 | CG  | GLN | A | 415 | 96.682  | 104.342 | -59.816 | 1.00 | 74.19  | A | C |
| ATOM | 1869 | CD  | GLN | A | 415 | 95.882  | 105.620 | -59.961 | 1.00 | 74.19  | A | C |
| ATOM | 1870 | OE1 | GLN | A | 415 | 96.232  | 106.499 | -60.750 | 1.00 | 74.19  | A | O |
| ATOM | 1871 | NE2 | GLN | A | 415 | 94.801  | 105.733 | -59.199 | 1.00 | 74.19  | A | N |
| ATOM | 1872 | C   | GLN | A | 415 | 97.928  | 101.824 | -60.867 | 1.00 | 74.19  | A | C |
| ATOM | 1873 | O   | GLN | A | 415 | 97.391  | 101.187 | -59.961 | 1.00 | 74.19  | A | O |
| ATOM | 1874 | N   | ASN | A | 416 | 97.822  | 101.490 | -62.149 | 1.00 | 34.42  | A | N |
| ATOM | 1875 | CA  | ASN | A | 416 | 97.056  | 100.327 | -62.579 | 1.00 | 34.42  | A | C |
| ATOM | 1876 | CB  | ASN | A | 416 | 96.618  | 100.487 | -64.038 | 1.00 | 34.42  | A | C |

|      |      |     |     |   |     |         |        |         |      |        |   |   |
|------|------|-----|-----|---|-----|---------|--------|---------|------|--------|---|---|
| ATOM | 1877 | CG  | ASN | A | 416 | 95.619  | 99.428 | -64.470 | 1.00 | 34.42  | A | C |
| ATOM | 1878 | OD1 | ASN | A | 416 | 95.618  | 98.310 | -63.957 | 1.00 | 34.42  | A | O |
| ATOM | 1879 | ND2 | ASN | A | 416 | 94.761  | 99.780 | -65.421 | 1.00 | 34.42  | A | N |
| ATOM | 1880 | C   | ASN | A | 416 | 97.850  | 99.036 | -62.403 | 1.00 | 34.42  | A | C |
| ATOM | 1881 | O   | ASN | A | 416 | 97.339  | 98.046 | -61.878 | 1.00 | 34.42  | A | O |
| ATOM | 1882 | N   | GLN | A | 417 | 99.103  | 99.056 | -62.843 | 1.00 | 41.97  | A | N |
| ATOM | 1883 | CA  | GLN | A | 417 | 99.970  | 97.888 | -62.746 | 1.00 | 41.97  | A | C |
| ATOM | 1884 | CB  | GLN | A | 417 | 101.282 | 98.133 | -63.495 | 1.00 | 41.97  | A | C |
| ATOM | 1885 | CG  | GLN | A | 417 | 102.244 | 96.956 | -63.472 | 1.00 | 41.97  | A | C |
| ATOM | 1886 | CD  | GLN | A | 417 | 101.723 | 95.758 | -64.243 | 1.00 | 41.97  | A | C |
| ATOM | 1887 | OE1 | GLN | A | 417 | 100.765 | 95.996 | -65.131 | 1.00 | 41.97  | A | O |
| ATOM | 1888 | NE2 | GLN | A | 417 | 102.181 | 94.632 | -64.047 | 1.00 | 41.97  | A | N |
| ATOM | 1889 | C   | GLN | A | 417 | 100.255 | 97.534 | -61.290 | 1.00 | 41.97  | A | C |
| ATOM | 1890 | O   | GLN | A | 417 | 100.289 | 98.405 | -60.421 | 1.00 | 41.97  | A | O |
| ATOM | 1891 | OXT | GLN | A | 417 | 100.460 | 96.370 | -60.946 | 1.00 | 41.97  | A | O |
| TER  |      |     |     |   |     |         |        |         |      |        |   |   |
| ATOM | 1892 | N   | PHE | B | 175 | 136.869 | 79.300 | -69.218 | 1.00 | 80.84  | B | N |
| ATOM | 1893 | CA  | PHE | B | 175 | 135.886 | 79.450 | -70.285 | 1.00 | 80.84  | B | C |
| ATOM | 1894 | CB  | PHE | B | 175 | 135.341 | 78.084 | -70.707 | 1.00 | 80.84  | B | C |
| ATOM | 1895 | CG  | PHE | B | 175 | 136.397 | 77.136 | -71.197 | 1.00 | 80.84  | B | C |
| ATOM | 1896 | CD1 | PHE | B | 175 | 136.780 | 77.133 | -72.527 | 1.00 | 80.84  | B | C |
| ATOM | 1897 | CD2 | PHE | B | 175 | 137.007 | 76.248 | -70.327 | 1.00 | 80.84  | B | C |
| ATOM | 1898 | CE1 | PHE | B | 175 | 137.752 | 76.262 | -72.981 | 1.00 | 80.84  | B | C |
| ATOM | 1899 | CE2 | PHE | B | 175 | 137.980 | 75.375 | -70.775 | 1.00 | 80.84  | B | C |
| ATOM | 1900 | CZ  | PHE | B | 175 | 138.353 | 75.382 | -72.104 | 1.00 | 80.84  | B | C |
| ATOM | 1901 | C   | PHE | B | 175 | 134.742 | 80.361 | -69.855 | 1.00 | 80.84  | B | C |
| ATOM | 1902 | O   | PHE | B | 175 | 133.966 | 80.834 | -70.685 | 1.00 | 80.84  | B | O |
| ATOM | 1903 | N   | GLU | B | 176 | 134.643 | 80.603 | -68.552 | 1.00 | 133.93 | B | N |
| ATOM | 1904 | CA  | GLU | B | 176 | 133.594 | 81.457 | -68.009 | 1.00 | 133.93 | B | C |
| ATOM | 1905 | CB  | GLU | B | 176 | 132.703 | 80.667 | -67.049 | 1.00 | 133.93 | B | C |
| ATOM | 1906 | CG  | GLU | B | 176 | 132.003 | 79.477 | -67.687 | 1.00 | 133.93 | B | C |
| ATOM | 1907 | CD  | GLU | B | 176 | 131.120 | 78.726 | -66.710 | 1.00 | 133.93 | B | C |
| ATOM | 1908 | OE1 | GLU | B | 176 | 131.058 | 79.131 | -65.530 | 1.00 | 133.93 | B | O |
| ATOM | 1909 | OE2 | GLU | B | 176 | 130.487 | 77.730 | -67.121 | 1.00 | 133.93 | B | O |
| ATOM | 1910 | C   | GLU | B | 176 | 134.187 | 82.668 | -67.296 | 1.00 | 133.93 | B | C |
| ATOM | 1911 | O   | GLU | B | 176 | 133.516 | 83.684 | -67.113 | 1.00 | 133.93 | B | O |
| ATOM | 1912 | N   | ASN | B | 177 | 135.450 | 82.553 | -66.898 | 1.00 | 62.69  | B | N |
| ATOM | 1913 | CA  | ASN | B | 177 | 136.135 | 83.636 | -66.201 | 1.00 | 62.69  | B | C |
| ATOM | 1914 | CB  | ASN | B | 177 | 136.285 | 83.304 | -64.715 | 1.00 | 62.69  | B | C |
| ATOM | 1915 | CG  | ASN | B | 177 | 134.950 | 83.079 | -64.031 | 1.00 | 62.69  | B | C |
| ATOM | 1916 | OD1 | ASN | B | 177 | 134.343 | 84.013 | -63.505 | 1.00 | 62.69  | B | O |
| ATOM | 1917 | ND2 | ASN | B | 177 | 134.485 | 81.835 | -64.035 | 1.00 | 62.69  | B | N |
| ATOM | 1918 | C   | ASN | B | 177 | 137.500 | 83.941 | -66.810 | 1.00 | 62.69  | B | C |
| ATOM | 1919 | O   | ASN | B | 177 | 138.520 | 83.430 | -66.347 | 1.00 | 62.69  | B | O |
| ATOM | 1920 | N   | PRO | B | 178 | 137.520 | 84.780 | -67.857 | 1.00 | 73.65  | B | N |
| ATOM | 1921 | CA  | PRO | B | 178 | 138.754 | 85.176 | -68.544 | 1.00 | 73.65  | B | C |
| ATOM | 1922 | CD  | PRO | B | 178 | 136.325 | 85.358 | -68.492 | 1.00 | 73.65  | B | C |
| ATOM | 1923 | CB  | PRO | B | 178 | 138.255 | 86.136 | -69.629 | 1.00 | 73.65  | B | C |
| ATOM | 1924 | CG  | PRO | B | 178 | 136.828 | 85.765 | -69.840 | 1.00 | 73.65  | B | C |
| ATOM | 1925 | C   | PRO | B | 178 | 139.722 | 85.902 | -67.615 | 1.00 | 73.65  | B | C |
| ATOM | 1926 | O   | PRO | B | 178 | 140.899 | 86.049 | -67.946 | 1.00 | 73.65  | B | O |
| ATOM | 1927 | N   | HIS | B | 179 | 139.227 | 86.351 | -66.466 | 1.00 | 64.97  | B | N |
| ATOM | 1928 | CA  | HIS | B | 179 | 140.052 | 87.081 | -65.509 | 1.00 | 64.97  | B | C |
| ATOM | 1929 | ND1 | HIS | B | 179 | 137.618 | 88.810 | -66.535 | 1.00 | 64.97  | B | N |
| ATOM | 1930 | CG  | HIS | B | 179 | 138.539 | 89.116 | -65.556 | 1.00 | 64.97  | B | C |
| ATOM | 1931 | CB  | HIS | B | 179 | 139.201 | 88.072 | -64.712 | 1.00 | 64.97  | B | C |
| ATOM | 1932 | NE2 | HIS | B | 179 | 137.825 | 90.943 | -66.543 | 1.00 | 64.97  | B | N |
| ATOM | 1933 | CD2 | HIS | B | 179 | 138.665 | 90.465 | -65.567 | 1.00 | 64.97  | B | C |
| ATOM | 1934 | CE1 | HIS | B | 179 | 137.205 | 89.924 | -67.112 | 1.00 | 64.97  | B | C |
| ATOM | 1935 | C   | HIS | B | 179 | 140.783 | 86.138 | -64.558 | 1.00 | 64.97  | B | C |
| ATOM | 1936 | O   | HIS | B | 179 | 141.437 | 86.582 | -63.614 | 1.00 | 64.97  | B | O |
| ATOM | 1937 | N   | THR | B | 180 | 140.669 | 84.838 | -64.810 | 1.00 | 98.23  | B | N |
| ATOM | 1938 | CA  | THR | B | 180 | 141.325 | 83.839 | -63.974 | 1.00 | 98.23  | B | C |
| ATOM | 1939 | CB  | THR | B | 180 | 140.821 | 82.417 | -64.288 | 1.00 | 98.23  | B | C |
| ATOM | 1940 | OG1 | THR | B | 180 | 139.426 | 82.321 | -63.976 | 1.00 | 98.23  | B | O |
| ATOM | 1941 | CG2 | THR | B | 180 | 141.589 | 81.389 | -63.471 | 1.00 | 98.23  | B | C |
| ATOM | 1942 | C   | THR | B | 180 | 142.840 | 83.880 | -64.141 | 1.00 | 98.23  | B | C |
| ATOM | 1943 | O   | THR | B | 180 | 143.579 | 83.986 | -63.162 | 1.00 | 98.23  | B | O |



|      |      |     |     |   |     |         |        |         |      |        |   |   |
|------|------|-----|-----|---|-----|---------|--------|---------|------|--------|---|---|
| ATOM | 1944 | N   | SER | B | 181 | 143.296 | 83.798 | -65.386 | 1.00 | 37.88  | B | N |
| ATOM | 1945 | CA  | SER | B | 181 | 144.724 | 83.822 | -65.681 | 1.00 | 37.88  | B | C |
| ATOM | 1946 | CB  | SER | B | 181 | 145.313 | 82.413 | -65.587 | 1.00 | 37.88  | B | C |
| ATOM | 1947 | OG  | SER | B | 181 | 144.677 | 81.533 | -66.497 | 1.00 | 37.88  | B | O |
| ATOM | 1948 | C   | SER | B | 181 | 144.993 | 84.411 | -67.061 | 1.00 | 37.88  | B | C |
| ATOM | 1949 | O   | SER | B | 181 | 144.073 | 84.864 | -67.744 | 1.00 | 37.88  | B | O |
| ATOM | 1950 | N   | THR | B | 182 | 146.259 | 84.403 | -67.466 | 1.00 | 92.23  | B | N |
| ATOM | 1951 | CA  | THR | B | 182 | 146.651 | 84.928 | -68.768 | 1.00 | 92.23  | B | C |
| ATOM | 1952 | CB  | THR | B | 182 | 148.183 | 85.006 | -68.907 | 1.00 | 92.23  | B | C |
| ATOM | 1953 | OG1 | THR | B | 182 | 148.716 | 85.859 | -67.887 | 1.00 | 92.23  | B | O |
| ATOM | 1954 | CG2 | THR | B | 182 | 148.567 | 85.555 | -70.273 | 1.00 | 92.23  | B | C |
| ATOM | 1955 | C   | THR | B | 182 | 146.089 | 84.071 | -69.896 | 1.00 | 92.23  | B | C |
| ATOM | 1956 | O   | THR | B | 182 | 145.561 | 84.592 | -70.879 | 1.00 | 92.23  | B | O |
| ATOM | 1957 | N   | MET | B | 183 | 146.205 | 82.755 | -69.749 | 1.00 | 58.27  | B | N |
| ATOM | 1958 | CA  | MET | B | 183 | 145.696 | 81.824 | -70.748 | 1.00 | 58.27  | B | C |
| ATOM | 1959 | CB  | MET | B | 183 | 146.067 | 80.386 | -70.381 | 1.00 | 58.27  | B | C |
| ATOM | 1960 | CG  | MET | B | 183 | 147.564 | 80.133 | -70.295 | 1.00 | 58.27  | B | C |
| ATOM | 1961 | SD  | MET | B | 183 | 147.962 | 78.422 | -69.890 | 1.00 | 58.27  | B | S |
| ATOM | 1962 | CE  | MET | B | 183 | 147.220 | 77.563 | -71.276 | 1.00 | 58.27  | B | C |
| ATOM | 1963 | C   | MET | B | 183 | 144.184 | 81.957 | -70.895 | 1.00 | 58.27  | B | C |
| ATOM | 1964 | O   | MET | B | 183 | 143.637 | 81.767 | -71.981 | 1.00 | 58.27  | B | O |
| ATOM | 1965 | N   | ALA | B | 184 | 143.515 | 82.285 | -69.795 | 1.00 | 28.36  | B | N |
| ATOM | 1966 | CA  | ALA | B | 184 | 142.070 | 82.477 | -69.806 | 1.00 | 28.36  | B | C |
| ATOM | 1967 | CB  | ALA | B | 184 | 141.539 | 82.590 | -68.387 | 1.00 | 28.36  | B | C |
| ATOM | 1968 | C   | ALA | B | 184 | 141.698 | 83.713 | -70.617 | 1.00 | 28.36  | B | C |
| ATOM | 1969 | O   | ALA | B | 184 | 140.622 | 83.777 | -71.212 | 1.00 | 28.36  | B | O |
| ATOM | 1970 | N   | LEU | B | 185 | 142.596 | 84.692 | -70.636 | 1.00 | 114.45 | B | N |
| ATOM | 1971 | CA  | LEU | B | 185 | 142.377 | 85.918 | -71.393 | 1.00 | 114.45 | B | C |
| ATOM | 1972 | CB  | LEU | B | 185 | 143.259 | 87.046 | -70.855 | 1.00 | 114.45 | B | C |
| ATOM | 1973 | CG  | LEU | B | 185 | 143.060 | 88.429 | -71.478 | 1.00 | 114.45 | B | C |
| ATOM | 1974 | CD1 | LEU | B | 185 | 141.623 | 88.895 | -71.305 | 1.00 | 114.45 | B | C |
| ATOM | 1975 | CD2 | LEU | B | 185 | 144.029 | 89.433 | -70.874 | 1.00 | 114.45 | B | C |
| ATOM | 1976 | C   | LEU | B | 185 | 142.658 | 85.691 | -72.875 | 1.00 | 114.45 | B | C |
| ATOM | 1977 | O   | LEU | B | 185 | 142.104 | 86.376 | -73.734 | 1.00 | 114.45 | B | O |
| ATOM | 1978 | N   | VAL | B | 186 | 143.523 | 84.725 | -73.166 | 1.00 | 33.25  | B | N |
| ATOM | 1979 | CA  | VAL | B | 186 | 143.855 | 84.384 | -74.544 | 1.00 | 33.25  | B | C |
| ATOM | 1980 | CB  | VAL | B | 186 | 144.998 | 83.354 | -74.613 | 1.00 | 33.25  | B | C |
| ATOM | 1981 | CG1 | VAL | B | 186 | 145.248 | 82.935 | -76.054 | 1.00 | 33.25  | B | C |
| ATOM | 1982 | CG2 | VAL | B | 186 | 146.262 | 83.924 | -73.989 | 1.00 | 33.25  | B | C |
| ATOM | 1983 | C   | VAL | B | 186 | 142.634 | 83.828 | -75.267 | 1.00 | 33.25  | B | C |
| ATOM | 1984 | O   | VAL | B | 186 | 142.322 | 84.236 | -76.386 | 1.00 | 33.25  | B | O |
| ATOM | 1985 | N   | PHE | B | 187 | 141.943 | 82.899 | -74.615 | 1.00 | 90.63  | B | N |
| ATOM | 1986 | CA  | PHE | B | 187 | 140.740 | 82.298 | -75.176 | 1.00 | 90.63  | B | C |
| ATOM | 1987 | CB  | PHE | B | 187 | 140.237 | 81.171 | -74.271 | 1.00 | 90.63  | B | C |
| ATOM | 1988 | CG  | PHE | B | 187 | 139.038 | 80.446 | -74.811 | 1.00 | 90.63  | B | C |
| ATOM | 1989 | CD1 | PHE | B | 187 | 139.190 | 79.406 | -75.712 | 1.00 | 90.63  | B | C |
| ATOM | 1990 | CD2 | PHE | B | 187 | 137.759 | 80.801 | -74.415 | 1.00 | 90.63  | B | C |
| ATOM | 1991 | CE1 | PHE | B | 187 | 138.089 | 78.735 | -76.211 | 1.00 | 90.63  | B | C |
| ATOM | 1992 | CE2 | PHE | B | 187 | 136.654 | 80.134 | -74.910 | 1.00 | 90.63  | B | C |
| ATOM | 1993 | CZ  | PHE | B | 187 | 136.820 | 79.099 | -75.809 | 1.00 | 90.63  | B | C |
| ATOM | 1994 | C   | PHE | B | 187 | 139.649 | 83.347 | -75.370 | 1.00 | 90.63  | B | C |
| ATOM | 1995 | O   | PHE | B | 187 | 138.729 | 83.161 | -76.166 | 1.00 | 90.63  | B | O |
| ATOM | 1996 | N   | TYR | B | 188 | 139.761 | 84.450 | -74.637 | 1.00 | 111.20 | B | N |
| ATOM | 1997 | CA  | TYR | B | 188 | 138.795 | 85.538 | -74.730 | 1.00 | 111.20 | B | C |
| ATOM | 1998 | CB  | TYR | B | 188 | 138.980 | 86.517 | -73.569 | 1.00 | 111.20 | B | C |
| ATOM | 1999 | CG  | TYR | B | 188 | 138.032 | 87.696 | -73.594 | 1.00 | 111.20 | B | C |
| ATOM | 2000 | CD1 | TYR | B | 188 | 136.769 | 87.609 | -73.024 | 1.00 | 111.20 | B | C |
| ATOM | 2001 | CD2 | TYR | B | 188 | 138.403 | 88.898 | -74.182 | 1.00 | 111.20 | B | C |
| ATOM | 2002 | CE1 | TYR | B | 188 | 135.901 | 88.685 | -73.043 | 1.00 | 111.20 | B | C |
| ATOM | 2003 | CE2 | TYR | B | 188 | 137.542 | 89.978 | -74.206 | 1.00 | 111.20 | B | C |
| ATOM | 2004 | CZ  | TYR | B | 188 | 136.293 | 89.866 | -73.636 | 1.00 | 111.20 | B | C |
| ATOM | 2005 | OH  | TYR | B | 188 | 135.433 | 90.940 | -73.657 | 1.00 | 111.20 | B | O |
| ATOM | 2006 | C   | TYR | B | 188 | 138.917 | 86.269 | -76.064 | 1.00 | 111.20 | B | C |
| ATOM | 2007 | O   | TYR | B | 188 | 137.915 | 86.551 | -76.721 | 1.00 | 111.20 | B | O |
| ATOM | 2008 | N   | TYR | B | 189 | 140.149 | 86.575 | -76.458 | 1.00 | 99.31  | B | N |
| ATOM | 2009 | CA  | TYR | B | 189 | 140.399 | 87.263 | -77.720 | 1.00 | 99.31  | B | C |
| ATOM | 2010 | CB  | TYR | B | 189 | 141.788 | 87.906 | -77.721 | 1.00 | 99.31  | B | C |
| ATOM | 2011 | CG  | TYR | B | 189 | 141.915 | 89.095 | -76.795 | 1.00 | 99.31  | B | C |

|      |      |     |     |   |     |         |        |         |      |        |   |   |
|------|------|-----|-----|---|-----|---------|--------|---------|------|--------|---|---|
| ATOM | 2012 | CD1 | TYR | B | 189 | 142.353 | 88.938 | -75.487 | 1.00 | 99.31  | B | C |
| ATOM | 2013 | CD2 | TYR | B | 189 | 141.596 | 90.374 | -77.229 | 1.00 | 99.31  | B | C |
| ATOM | 2014 | CE1 | TYR | B | 189 | 142.470 | 90.023 | -74.638 | 1.00 | 99.31  | B | C |
| ATOM | 2015 | CE2 | TYR | B | 189 | 141.710 | 91.464 | -76.388 | 1.00 | 99.31  | B | C |
| ATOM | 2016 | CZ  | TYR | B | 189 | 142.147 | 91.283 | -75.094 | 1.00 | 99.31  | B | C |
| ATOM | 2017 | OH  | TYR | B | 189 | 142.262 | 92.366 | -74.253 | 1.00 | 99.31  | B | O |
| ATOM | 2018 | C   | TYR | B | 189 | 140.254 | 86.319 | -78.910 | 1.00 | 99.31  | B | C |
| ATOM | 2019 | O   | TYR | B | 189 | 139.728 | 86.703 | -79.955 | 1.00 | 99.31  | B | O |
| ATOM | 2020 | N   | VAL | B | 190 | 140.724 | 85.087 | -78.747 | 1.00 | 25.67  | B | N |
| ATOM | 2021 | CA  | VAL | B | 190 | 140.623 | 84.084 | -79.802 | 1.00 | 25.67  | B | C |
| ATOM | 2022 | CB  | VAL | B | 190 | 141.222 | 82.734 | -79.362 | 1.00 | 25.67  | B | C |
| ATOM | 2023 | CG1 | VAL | B | 190 | 140.915 | 81.657 | -80.391 | 1.00 | 25.67  | B | C |
| ATOM | 2024 | CG2 | VAL | B | 190 | 142.722 | 82.864 | -79.146 | 1.00 | 25.67  | B | C |
| ATOM | 2025 | C   | VAL | B | 190 | 139.173 | 83.877 | -80.223 | 1.00 | 25.67  | B | C |
| ATOM | 2026 | O   | VAL | B | 190 | 138.855 | 83.878 | -81.412 | 1.00 | 25.67  | B | O |
| ATOM | 2027 | N   | THR | B | 191 | 138.296 | 83.703 | -79.240 | 1.00 | 113.27 | B | N |
| ATOM | 2028 | CA  | THR | B | 191 | 136.875 | 83.517 | -79.505 | 1.00 | 113.27 | B | C |
| ATOM | 2029 | CB  | THR | B | 191 | 136.083 | 83.278 | -78.206 | 1.00 | 113.27 | B | C |
| ATOM | 2030 | OG1 | THR | B | 191 | 136.563 | 82.092 | -77.561 | 1.00 | 113.27 | B | O |
| ATOM | 2031 | CG2 | THR | B | 191 | 134.600 | 83.121 | -78.505 | 1.00 | 113.27 | B | C |
| ATOM | 2032 | C   | THR | B | 191 | 136.292 | 84.726 | -80.229 | 1.00 | 113.27 | B | C |
| ATOM | 2033 | O   | THR | B | 191 | 135.623 | 84.584 | -81.252 | 1.00 | 113.27 | B | O |
| ATOM | 2034 | N   | GLY | B | 192 | 136.556 | 85.913 | -79.693 | 1.00 | 21.76  | B | N |
| ATOM | 2035 | CA  | GLY | B | 192 | 136.057 | 87.146 | -80.274 | 1.00 | 21.76  | B | C |
| ATOM | 2036 | C   | GLY | B | 192 | 136.442 | 87.316 | -81.731 | 1.00 | 21.76  | B | C |
| ATOM | 2037 | O   | GLY | B | 192 | 135.729 | 87.963 | -82.498 | 1.00 | 21.76  | B | O |
| ATOM | 2038 | N   | PHE | B | 193 | 137.574 | 86.733 | -82.113 | 1.00 | 45.84  | B | N |
| ATOM | 2039 | CA  | PHE | B | 193 | 138.045 | 86.808 | -83.491 | 1.00 | 45.84  | B | C |
| ATOM | 2040 | CB  | PHE | B | 193 | 139.513 | 86.387 | -83.584 | 1.00 | 45.84  | B | C |
| ATOM | 2041 | CG  | PHE | B | 193 | 140.460 | 87.332 | -82.900 | 1.00 | 45.84  | B | C |
| ATOM | 2042 | CD1 | PHE | B | 193 | 140.081 | 88.634 | -82.623 | 1.00 | 45.84  | B | C |
| ATOM | 2043 | CD2 | PHE | B | 193 | 141.731 | 86.918 | -82.536 | 1.00 | 45.84  | B | C |
| ATOM | 2044 | CE1 | PHE | B | 193 | 140.950 | 89.506 | -81.995 | 1.00 | 45.84  | B | C |
| ATOM | 2045 | CE2 | PHE | B | 193 | 142.604 | 87.784 | -81.907 | 1.00 | 45.84  | B | C |
| ATOM | 2046 | CZ  | PHE | B | 193 | 142.213 | 89.080 | -81.636 | 1.00 | 45.84  | B | C |
| ATOM | 2047 | C   | PHE | B | 193 | 137.188 | 85.950 | -84.417 | 1.00 | 45.84  | B | C |
| ATOM | 2048 | O   | PHE | B | 193 | 136.773 | 86.399 | -85.484 | 1.00 | 45.84  | B | O |
| ATOM | 2049 | N   | PHE | B | 194 | 136.926 | 84.714 | -84.001 | 1.00 | 127.60 | B | N |
| ATOM | 2050 | CA  | PHE | B | 194 | 136.098 | 83.804 | -84.785 | 1.00 | 127.60 | B | C |
| ATOM | 2051 | CB  | PHE | B | 194 | 136.085 | 82.407 | -84.160 | 1.00 | 127.60 | B | C |
| ATOM | 2052 | CG  | PHE | B | 194 | 137.360 | 81.639 | -84.365 | 1.00 | 127.60 | B | C |
| ATOM | 2053 | CD1 | PHE | B | 194 | 138.391 | 81.721 | -83.445 | 1.00 | 127.60 | B | C |
| ATOM | 2054 | CD2 | PHE | B | 194 | 137.525 | 80.832 | -85.479 | 1.00 | 127.60 | B | C |
| ATOM | 2055 | CE1 | PHE | B | 194 | 139.565 | 81.014 | -83.633 | 1.00 | 127.60 | B | C |
| ATOM | 2056 | CE2 | PHE | B | 194 | 138.696 | 80.123 | -85.672 | 1.00 | 127.60 | B | C |
| ATOM | 2057 | CZ  | PHE | B | 194 | 139.717 | 80.214 | -84.747 | 1.00 | 127.60 | B | C |
| ATOM | 2058 | C   | PHE | B | 194 | 134.673 | 84.330 | -84.928 | 1.00 | 127.60 | B | C |
| ATOM | 2059 | O   | PHE | B | 194 | 134.009 | 84.081 | -85.934 | 1.00 | 127.60 | B | O |
| ATOM | 2060 | N   | ILE | B | 195 | 134.209 | 85.058 | -83.917 | 1.00 | 36.34  | B | N |
| ATOM | 2061 | CA  | ILE | B | 195 | 132.874 | 85.642 | -83.947 | 1.00 | 36.34  | B | C |
| ATOM | 2062 | CB  | ILE | B | 195 | 132.480 | 86.225 | -82.578 | 1.00 | 36.34  | B | C |
| ATOM | 2063 | CG2 | ILE | B | 195 | 131.043 | 86.720 | -82.603 | 1.00 | 36.34  | B | C |
| ATOM | 2064 | CG1 | ILE | B | 195 | 132.669 | 85.181 | -81.477 | 1.00 | 36.34  | B | C |
| ATOM | 2065 | CD1 | ILE | B | 195 | 132.411 | 85.712 | -80.084 | 1.00 | 36.34  | B | C |
| ATOM | 2066 | C   | ILE | B | 195 | 132.800 | 86.747 | -84.994 | 1.00 | 36.34  | B | C |
| ATOM | 2067 | O   | ILE | B | 195 | 131.776 | 86.927 | -85.652 | 1.00 | 36.34  | B | O |
| ATOM | 2068 | N   | ALA | B | 196 | 133.896 | 87.484 | -85.142 | 1.00 | 30.78  | B | N |
| ATOM | 2069 | CA  | ALA | B | 196 | 133.966 | 88.565 | -86.117 | 1.00 | 30.78  | B | C |
| ATOM | 2070 | CB  | ALA | B | 196 | 135.119 | 89.501 | -85.788 | 1.00 | 30.78  | B | C |
| ATOM | 2071 | C   | ALA | B | 196 | 134.113 | 88.016 | -87.532 | 1.00 | 30.78  | B | C |
| ATOM | 2072 | O   | ALA | B | 196 | 133.424 | 88.456 | -88.453 | 1.00 | 30.78  | B | O |
| ATOM | 2073 | N   | VAL | B | 197 | 135.012 | 87.051 | -87.696 | 1.00 | 86.02  | B | N |
| ATOM | 2074 | CA  | VAL | B | 197 | 135.254 | 86.438 | -88.998 | 1.00 | 86.02  | B | C |
| ATOM | 2075 | CB  | VAL | B | 197 | 136.395 | 85.403 | -88.931 | 1.00 | 86.02  | B | C |
| ATOM | 2076 | CG1 | VAL | B | 197 | 136.562 | 84.709 | -90.274 | 1.00 | 86.02  | B | C |
| ATOM | 2077 | CG2 | VAL | B | 197 | 137.693 | 86.071 | -88.505 | 1.00 | 86.02  | B | C |
| ATOM | 2078 | C   | VAL | B | 197 | 133.995 | 85.767 | -89.538 | 1.00 | 86.02  | B | C |
| ATOM | 2079 | O   | VAL | B | 197 | 133.707 | 85.838 | -90.732 | 1.00 | 86.02  | B | O |

|      |      |     |     |   |     |         |        |          |      |        |   |   |
|------|------|-----|-----|---|-----|---------|--------|----------|------|--------|---|---|
| ATOM | 2080 | N   | SER | B | 198 | 133.248 | 85.118 | -88.651  | 1.00 | 41.44  | B | N |
| ATOM | 2081 | CA  | SER | B | 198 | 132.019 | 84.437 | -89.040  | 1.00 | 41.44  | B | C |
| ATOM | 2082 | CB  | SER | B | 198 | 131.444 | 83.649 | -87.860  | 1.00 | 41.44  | B | C |
| ATOM | 2083 | OG  | SER | B | 198 | 131.123 | 84.508 | -86.780  | 1.00 | 41.44  | B | O |
| ATOM | 2084 | C   | SER | B | 198 | 130.982 | 85.423 | -89.570  | 1.00 | 41.44  | B | C |
| ATOM | 2085 | O   | SER | B | 198 | 130.161 | 85.076 | -90.419  | 1.00 | 41.44  | B | O |
| ATOM | 2086 | N   | VAL | B | 199 | 131.027 | 86.652 | -89.066  | 1.00 | 108.02 | B | N |
| ATOM | 2087 | CA  | VAL | B | 199 | 130.105 | 87.695 | -89.502  | 1.00 | 108.02 | B | C |
| ATOM | 2088 | CB  | VAL | B | 199 | 129.937 | 88.790 | -88.430  | 1.00 | 108.02 | B | C |
| ATOM | 2089 | CG1 | VAL | B | 199 | 129.073 | 89.924 | -88.961  | 1.00 | 108.02 | B | C |
| ATOM | 2090 | CG2 | VAL | B | 199 | 129.337 | 88.203 | -87.162  | 1.00 | 108.02 | B | C |
| ATOM | 2091 | C   | VAL | B | 199 | 130.576 | 88.336 | -90.805  | 1.00 | 108.02 | B | C |
| ATOM | 2092 | O   | VAL | B | 199 | 129.785 | 88.548 | -91.724  | 1.00 | 108.02 | B | O |
| ATOM | 2093 | N   | ILE | B | 200 | 131.867 | 88.642 | -90.876  | 1.00 | 89.21  | B | N |
| ATOM | 2094 | CA  | ILE | B | 200 | 132.447 | 89.242 | -92.072  | 1.00 | 89.21  | B | C |
| ATOM | 2095 | CB  | ILE | B | 200 | 133.934 | 89.588 | -91.869  | 1.00 | 89.21  | B | C |
| ATOM | 2096 | CG2 | ILE | B | 200 | 134.525 | 90.168 | -93.145  | 1.00 | 89.21  | B | C |
| ATOM | 2097 | CG1 | ILE | B | 200 | 134.100 | 90.570 | -90.708  | 1.00 | 89.21  | B | C |
| ATOM | 2098 | CD1 | ILE | B | 200 | 133.376 | 91.882 | -90.912  | 1.00 | 89.21  | B | C |
| ATOM | 2099 | C   | ILE | B | 200 | 132.307 | 88.313 | -93.273  | 1.00 | 89.21  | B | C |
| ATOM | 2100 | O   | ILE | B | 200 | 131.868 | 88.730 | -94.345  | 1.00 | 89.21  | B | O |
| ATOM | 2101 | N   | ALA | B | 201 | 132.682 | 87.052 | -93.085  | 1.00 | 33.80  | B | N |
| ATOM | 2102 | CA  | ALA | B | 201 | 132.575 | 86.056 | -94.145  | 1.00 | 33.80  | B | C |
| ATOM | 2103 | CB  | ALA | B | 201 | 133.166 | 84.731 | -93.691  | 1.00 | 33.80  | B | C |
| ATOM | 2104 | C   | ALA | B | 201 | 131.124 | 85.875 | -94.574  | 1.00 | 33.80  | B | C |
| ATOM | 2105 | O   | ALA | B | 201 | 130.838 | 85.662 | -95.752  | 1.00 | 33.80  | B | O |
| ATOM | 2106 | N   | ASN | B | 202 | 130.212 | 85.963 | -93.611  | 1.00 | 47.57  | B | N |
| ATOM | 2107 | CA  | ASN | B | 202 | 128.787 | 85.847 | -93.890  | 1.00 | 47.57  | B | C |
| ATOM | 2108 | CB  | ASN | B | 202 | 127.976 | 86.009 | -92.602  | 1.00 | 47.57  | B | C |
| ATOM | 2109 | CG  | ASN | B | 202 | 126.510 | 85.658 | -92.783  | 1.00 | 47.57  | B | C |
| ATOM | 2110 | OD1 | ASN | B | 202 | 125.944 | 85.830 | -93.862  | 1.00 | 47.57  | B | O |
| ATOM | 2111 | ND2 | ASN | B | 202 | 125.887 | 85.163 | -91.720  | 1.00 | 47.57  | B | N |
| ATOM | 2112 | C   | ASN | B | 202 | 128.348 | 86.876 | -94.926  | 1.00 | 47.57  | B | C |
| ATOM | 2113 | O   | ASN | B | 202 | 127.578 | 86.569 | -95.836  | 1.00 | 47.57  | B | O |
| ATOM | 2114 | N   | VAL | B | 203 | 128.848 | 88.099 | -94.781  | 1.00 | 47.39  | B | N |
| ATOM | 2115 | CA  | VAL | B | 203 | 128.533 | 89.173 | -95.714  | 1.00 | 47.39  | B | C |
| ATOM | 2116 | CB  | VAL | B | 203 | 129.042 | 90.533 | -95.198  | 1.00 | 47.39  | B | C |
| ATOM | 2117 | CG1 | VAL | B | 203 | 128.703 | 91.638 | -96.187  | 1.00 | 47.39  | B | C |
| ATOM | 2118 | CG2 | VAL | B | 203 | 128.452 | 90.835 | -93.829  | 1.00 | 47.39  | B | C |
| ATOM | 2119 | C   | VAL | B | 203 | 129.140 | 88.896 | -97.086  | 1.00 | 47.39  | B | C |
| ATOM | 2120 | O   | VAL | B | 203 | 128.534 | 89.195 | -98.116  | 1.00 | 47.39  | B | O |
| ATOM | 2121 | N   | VAL | B | 204 | 130.338 | 88.320 | -97.093  | 1.00 | 117.92 | B | N |
| ATOM | 2122 | CA  | VAL | B | 204 | 131.030 | 88.004 | -98.336  | 1.00 | 117.92 | B | C |
| ATOM | 2123 | CB  | VAL | B | 204 | 132.485 | 87.567 | -98.077  | 1.00 | 117.92 | B | C |
| ATOM | 2124 | CG1 | VAL | B | 204 | 133.216 | 87.342 | -99.392  | 1.00 | 117.92 | B | C |
| ATOM | 2125 | CG2 | VAL | B | 204 | 133.208 | 88.607 | -97.237  | 1.00 | 117.92 | B | C |
| ATOM | 2126 | C   | VAL | B | 204 | 130.301 | 86.905 | -99.105  | 1.00 | 117.92 | B | C |
| ATOM | 2127 | O   | VAL | B | 204 | 130.374 | 86.839 | -100.332 | 1.00 | 117.92 | B | O |
| ATOM | 2128 | N   | GLU | B | 205 | 129.597 | 86.045 | -98.377  | 1.00 | 86.49  | B | N |
| ATOM | 2129 | CA  | GLU | B | 205 | 128.835 | 84.967 | -98.996  | 1.00 | 86.49  | B | C |
| ATOM | 2130 | CB  | GLU | B | 205 | 128.311 | 83.999 | -97.934  | 1.00 | 86.49  | B | C |
| ATOM | 2131 | CG  | GLU | B | 205 | 129.397 | 83.289 | -97.143  | 1.00 | 86.49  | B | C |
| ATOM | 2132 | CD  | GLU | B | 205 | 128.831 | 82.349 | -96.097  | 1.00 | 86.49  | B | C |
| ATOM | 2133 | OE1 | GLU | B | 205 | 127.590 | 82.255 | -95.992  | 1.00 | 86.49  | B | O |
| ATOM | 2134 | OE2 | GLU | B | 205 | 129.625 | 81.706 | -95.380  | 1.00 | 86.49  | B | O |
| ATOM | 2135 | C   | GLU | B | 205 | 127.674 | 85.520 | -99.815  | 1.00 | 86.49  | B | C |
| ATOM | 2136 | O   | GLU | B | 205 | 127.164 | 84.854 | -100.716 | 1.00 | 86.49  | B | O |
| ATOM | 2137 | N   | THR | B | 206 | 127.262 | 86.743 | -99.497  | 1.00 | 119.91 | B | N |
| ATOM | 2138 | CA  | THR | B | 206 | 126.144 | 87.380 | -100.182 | 1.00 | 119.91 | B | C |
| ATOM | 2139 | CB  | THR | B | 206 | 125.454 | 88.422 | -99.281  | 1.00 | 119.91 | B | C |
| ATOM | 2140 | OG1 | THR | B | 206 | 125.154 | 87.834 | -98.009  | 1.00 | 119.91 | B | O |
| ATOM | 2141 | CG2 | THR | B | 206 | 124.166 | 88.918 | -99.922  | 1.00 | 119.91 | B | C |
| ATOM | 2142 | C   | THR | B | 206 | 126.597 | 88.050 | -101.476 | 1.00 | 119.91 | B | C |
| ATOM | 2143 | O   | THR | B | 206 | 125.785 | 88.329 | -102.358 | 1.00 | 119.91 | B | O |
| ATOM | 2144 | N   | VAL | B | 207 | 127.898 | 88.306 | -101.581 | 1.00 | 81.16  | B | N |
| ATOM | 2145 | CA  | VAL | B | 207 | 128.471 | 88.916 | -102.777 | 1.00 | 81.16  | B | C |
| ATOM | 2146 | CB  | VAL | B | 207 | 130.012 | 88.834 | -102.767 | 1.00 | 81.16  | B | C |
| ATOM | 2147 | CG1 | VAL | B | 207 | 130.582 | 89.274 | -104.107 | 1.00 | 81.16  | B | C |

|      |      |     |     |   |     |         |                |      |        |   |   |
|------|------|-----|-----|---|-----|---------|----------------|------|--------|---|---|
| ATOM | 2148 | CG2 | VAL | B | 207 | 130.581 | 89.677-101.635 | 1.00 | 81.16  | B | C |
| ATOM | 2149 | C   | VAL | B | 207 | 127.936 | 88.249-104.040 | 1.00 | 81.16  | B | C |
| ATOM | 2150 | O   | VAL | B | 207 | 127.928 | 87.022-104.141 | 1.00 | 81.16  | B | O |
| ATOM | 2151 | N   | PRO | B | 208 | 127.480 | 89.062-105.006 | 1.00 | 163.31 | B | N |
| ATOM | 2152 | CA  | PRO | B | 208 | 126.901 | 88.590-106.269 | 1.00 | 163.31 | B | C |
| ATOM | 2153 | CD  | PRO | B | 208 | 127.495 | 90.533-104.927 | 1.00 | 163.31 | B | C |
| ATOM | 2154 | CB  | PRO | B | 208 | 126.913 | 89.847-107.139 | 1.00 | 163.31 | B | C |
| ATOM | 2155 | CG  | PRO | B | 208 | 126.750 | 90.956-106.166 | 1.00 | 163.31 | B | C |
| ATOM | 2156 | C   | PRO | B | 208 | 127.726 | 87.487-106.926 | 1.00 | 163.31 | B | C |
| ATOM | 2157 | O   | PRO | B | 208 | 128.679 | 87.775-107.650 | 1.00 | 163.31 | B | O |
| ATOM | 2158 | N   | CYS | B | 209 | 127.350 | 86.237-106.671 | 1.00 | 122.13 | B | N |
| ATOM | 2159 | CA  | CYS | B | 209 | 128.023 | 85.085-107.262 | 1.00 | 122.13 | B | C |
| ATOM | 2160 | CB  | CYS | B | 209 | 129.465 | 84.982-106.761 | 1.00 | 122.13 | B | C |
| ATOM | 2161 | SG  | CYS | B | 209 | 129.622 | 84.662-104.989 | 1.00 | 122.13 | B | S |
| ATOM | 2162 | C   | CYS | B | 209 | 127.266 | 83.801-106.941 | 1.00 | 122.13 | B | C |
| ATOM | 2163 | O   | CYS | B | 209 | 126.092 | 83.838-106.576 | 1.00 | 122.13 | B | O |
| ATOM | 2164 | N   | GLY | B | 210 | 127.945 | 82.666-107.078 | 1.00 | 296.88 | B | N |
| ATOM | 2165 | CA  | GLY | B | 210 | 127.345 | 81.378-106.784 | 1.00 | 296.88 | B | C |
| ATOM | 2166 | C   | GLY | B | 210 | 126.536 | 80.821-107.939 | 1.00 | 296.88 | B | C |
| ATOM | 2167 | O   | GLY | B | 210 | 126.547 | 81.370-109.041 | 1.00 | 296.88 | B | O |
| ATOM | 2168 | N   | SER | B | 211 | 125.831 | 79.724-107.684 | 1.00 | 230.38 | B | N |
| ATOM | 2169 | CA  | SER | B | 211 | 125.009 | 79.084-108.704 | 1.00 | 230.38 | B | C |
| ATOM | 2170 | CB  | SER | B | 211 | 125.453 | 77.635-108.915 | 1.00 | 230.38 | B | C |
| ATOM | 2171 | OG  | SER | B | 211 | 126.801 | 77.572-109.347 | 1.00 | 230.38 | B | O |
| ATOM | 2172 | C   | SER | B | 211 | 123.530 | 79.129-108.332 | 1.00 | 230.38 | B | C |
| ATOM | 2173 | O   | SER | B | 211 | 122.948 | 80.205-108.192 | 1.00 | 230.38 | B | O |
| ATOM | 2174 | N   | SER | B | 212 | 122.929 | 77.954-108.174 | 1.00 | 146.29 | B | N |
| ATOM | 2175 | CA  | SER | B | 212 | 121.517 | 77.856-107.817 | 1.00 | 146.29 | B | C |
| ATOM | 2176 | CB  | SER | B | 212 | 120.710 | 77.217-108.953 | 1.00 | 146.29 | B | C |
| ATOM | 2177 | OG  | SER | B | 212 | 120.783 | 77.998-110.134 | 1.00 | 146.29 | B | O |
| ATOM | 2178 | C   | SER | B | 212 | 121.293 | 77.098-106.505 | 1.00 | 146.29 | B | C |
| ATOM | 2179 | O   | SER | B | 212 | 120.624 | 77.606-105.604 | 1.00 | 146.29 | B | O |
| ATOM | 2180 | N   | PRO | B | 213 | 121.852 | 75.881-106.389 | 1.00 | 129.39 | B | N |
| ATOM | 2181 | CA  | PRO | B | 213 | 121.652 | 75.091-105.171 | 1.00 | 129.39 | B | C |
| ATOM | 2182 | CD  | PRO | B | 213 | 122.680 | 75.158-107.365 | 1.00 | 129.39 | B | C |
| ATOM | 2183 | CB  | PRO | B | 213 | 122.064 | 73.672-105.594 | 1.00 | 129.39 | B | C |
| ATOM | 2184 | CG  | PRO | B | 213 | 122.332 | 73.739-107.081 | 1.00 | 129.39 | B | C |
| ATOM | 2185 | C   | PRO | B | 213 | 122.561 | 75.566-104.046 | 1.00 | 129.39 | B | C |
| ATOM | 2186 | O   | PRO | B | 213 | 122.329 | 75.236-102.884 | 1.00 | 129.39 | B | O |
| ATOM | 2187 | N   | GLY | B | 214 | 123.592 | 76.325-104.401 | 1.00 | 105.51 | B | N |
| ATOM | 2188 | CA  | GLY | B | 214 | 124.538 | 76.831-103.427 | 1.00 | 105.51 | B | C |
| ATOM | 2189 | C   | GLY | B | 214 | 124.355 | 78.312-103.164 | 1.00 | 105.51 | B | C |
| ATOM | 2190 | O   | GLY | B | 214 | 125.090 | 78.910-102.379 | 1.00 | 105.51 | B | O |
| ATOM | 2191 | N   | HIS | B | 215 | 123.367 | 78.905-103.826 | 1.00 | 142.23 | B | N |
| ATOM | 2192 | CA  | HIS | B | 215 | 123.083 | 80.326-103.668 | 1.00 | 142.23 | B | C |
| ATOM | 2193 | ND1 | HIS | B | 215 | 123.087 | 83.318-104.619 | 1.00 | 142.23 | B | N |
| ATOM | 2194 | CG  | HIS | B | 215 | 122.136 | 82.351-104.862 | 1.00 | 142.23 | B | C |
| ATOM | 2195 | CB  | HIS | B | 215 | 122.468 | 80.894-104.948 | 1.00 | 142.23 | B | C |
| ATOM | 2196 | NE2 | HIS | B | 215 | 121.217 | 84.344-104.817 | 1.00 | 142.23 | B | N |
| ATOM | 2197 | CD2 | HIS | B | 215 | 120.957 | 83.006-104.986 | 1.00 | 142.23 | B | C |
| ATOM | 2198 | CE1 | HIS | B | 215 | 122.509 | 84.506-104.597 | 1.00 | 142.23 | B | C |
| ATOM | 2199 | C   | HIS | B | 215 | 122.155 | 80.578-102.484 | 1.00 | 142.23 | B | C |
| ATOM | 2200 | O   | HIS | B | 215 | 122.276 | 81.590-101.793 | 1.00 | 142.23 | B | O |
| ATOM | 2201 | N   | ILE | B | 216 | 121.228 | 79.653-102.257 | 1.00 | 67.89  | B | N |
| ATOM | 2202 | CA  | ILE | B | 216 | 120.279 | 79.773-101.157 | 1.00 | 67.89  | B | C |
| ATOM | 2203 | CB  | ILE | B | 216 | 119.148 | 78.734-101.268 | 1.00 | 67.89  | B | C |
| ATOM | 2204 | CG2 | ILE | B | 216 | 118.137 | 78.927-100.149 | 1.00 | 67.89  | B | C |
| ATOM | 2205 | CG1 | ILE | B | 216 | 118.468 | 78.829-102.635 | 1.00 | 67.89  | B | C |
| ATOM | 2206 | CD1 | ILE | B | 216 | 117.334 | 77.846-102.822 | 1.00 | 67.89  | B | C |
| ATOM | 2207 | C   | ILE | B | 216 | 120.980 | 79.605-99.813  | 1.00 | 67.89  | B | C |
| ATOM | 2208 | O   | ILE | B | 216 | 120.820 | 80.427-98.911  | 1.00 | 67.89  | B | O |
| ATOM | 2209 | N   | LYS | B | 217 | 121.757 | 78.534-99.688  | 1.00 | 172.29 | B | N |
| ATOM | 2210 | CA  | LYS | B | 217 | 122.502 | 78.269-98.463  | 1.00 | 172.29 | B | C |
| ATOM | 2211 | CB  | LYS | B | 217 | 122.854 | 76.783-98.362  | 1.00 | 172.29 | B | C |
| ATOM | 2212 | CG  | LYS | B | 217 | 123.444 | 76.367-97.023  | 1.00 | 172.29 | B | C |
| ATOM | 2213 | CD  | LYS | B | 217 | 122.474 | 76.641-95.884  | 1.00 | 172.29 | B | C |
| ATOM | 2214 | CE  | LYS | B | 217 | 123.066 | 76.233-94.543  | 1.00 | 172.29 | B | C |
| ATOM | 2215 | NZ  | LYS | B | 217 | 122.130 | 76.498-93.416  | 1.00 | 172.29 | B | N |

|      |      |     |     |   |     |         |        |          |            |   |   |
|------|------|-----|-----|---|-----|---------|--------|----------|------------|---|---|
| ATOM | 2216 | C   | LYS | B | 217 | 123.767 | 79.120 | -98.419  | 1.00172.29 | B | C |
| ATOM | 2217 | O   | LYS | B | 217 | 124.511 | 79.096 | -97.438  | 1.00172.29 | B | O |
| ATOM | 2218 | N   | GLU | B | 218 | 124.000 | 79.870 | -99.492  | 1.00302.48 | B | N |
| ATOM | 2219 | CA  | GLU | B | 218 | 125.154 | 80.760 | -99.590  | 1.00302.48 | B | C |
| ATOM | 2220 | CB  | GLU | B | 218 | 125.183 | 81.740 | -98.414  | 1.00302.48 | B | C |
| ATOM | 2221 | CG  | GLU | B | 218 | 123.931 | 82.596 | -98.286  | 1.00302.48 | B | C |
| ATOM | 2222 | CD  | GLU | B | 218 | 123.736 | 83.531 | -99.465  | 1.00302.48 | B | C |
| ATOM | 2223 | OE1 | GLU | B | 218 | 124.679 | 83.683 | -100.270 | 1.00302.48 | B | O |
| ATOM | 2224 | OE2 | GLU | B | 218 | 122.639 | 84.115 | -99.585  | 1.00302.48 | B | O |
| ATOM | 2225 | C   | GLU | B | 218 | 126.471 | 79.992 | -99.672  | 1.00302.48 | B | C |
| ATOM | 2226 | O   | GLU | B | 218 | 127.542 | 80.591 | -99.765  | 1.00302.48 | B | O |
| ATOM | 2227 | N   | LEU | B | 219 | 126.384 | 78.667 | -99.640  | 1.00167.09 | B | N |
| ATOM | 2228 | CA  | LEU | B | 219 | 127.568 | 77.819 | -99.734  | 1.00167.09 | B | C |
| ATOM | 2229 | CB  | LEU | B | 219 | 128.417 | 77.925 | -98.461  | 1.00167.09 | B | C |
| ATOM | 2230 | CG  | LEU | B | 219 | 127.711 | 77.929 | -97.101  | 1.00167.09 | B | C |
| ATOM | 2231 | CD1 | LEU | B | 219 | 127.284 | 76.529 | -96.689  | 1.00167.09 | B | C |
| ATOM | 2232 | CD2 | LEU | B | 219 | 128.620 | 78.532 | -96.042  | 1.00167.09 | B | C |
| ATOM | 2233 | C   | LEU | B | 219 | 127.208 | 76.365 | -100.036 | 1.00167.09 | B | C |
| ATOM | 2234 | O   | LEU | B | 219 | 126.424 | 75.749 | -99.316  | 1.00167.09 | B | O |
| ATOM | 2235 | N   | PRO | B | 220 | 127.775 | 75.820 | -101.122 | 1.00155.58 | B | N |
| ATOM | 2236 | CA  | PRO | B | 220 | 127.549 | 74.429 | -101.529 | 1.00155.58 | B | C |
| ATOM | 2237 | CD  | PRO | B | 220 | 128.597 | 76.553 | -102.099 | 1.00155.58 | B | C |
| ATOM | 2238 | CB  | PRO | B | 220 | 128.342 | 74.314 | -102.835 | 1.00155.58 | B | C |
| ATOM | 2239 | CG  | PRO | B | 220 | 128.470 | 75.716 | -103.331 | 1.00155.58 | B | C |
| ATOM | 2240 | C   | PRO | B | 220 | 128.096 | 73.445 | -100.500 | 1.00155.58 | B | C |
| ATOM | 2241 | O   | PRO | B | 220 | 129.309 | 73.255 | -100.414 | 1.00155.58 | B | O |
| ATOM | 2242 | N   | CYS | B | 221 | 127.206 | 72.827 | -99.730  | 1.00 60.66 | B | N |
| ATOM | 2243 | CA  | CYS | B | 221 | 127.613 | 71.868 | -98.710  | 1.00 60.66 | B | C |
| ATOM | 2244 | CB  | CYS | B | 221 | 126.446 | 71.556 | -97.772  | 1.00 60.66 | B | C |
| ATOM | 2245 | SG  | CYS | B | 221 | 125.790 | 72.995 | -96.896  | 1.00 60.66 | B | S |
| ATOM | 2246 | C   | CYS | B | 221 | 128.139 | 70.583 | -99.342  | 1.00 60.66 | B | C |
| ATOM | 2247 | O   | CYS | B | 221 | 127.455 | 69.951 | -100.147 | 1.00 60.66 | B | O |
| ATOM | 2248 | N   | GLY | B | 222 | 129.358 | 70.204 | -98.974  | 1.00 31.84 | B | N |
| ATOM | 2249 | CA  | GLY | B | 222 | 129.977 | 69.005 | -99.507  | 1.00 31.84 | B | C |
| ATOM | 2250 | C   | GLY | B | 222 | 131.211 | 68.588 | -98.730  | 1.00 31.84 | B | C |
| ATOM | 2251 | O   | GLY | B | 222 | 131.755 | 69.364 | -97.944  | 1.00 31.84 | B | O |
| ATOM | 2252 | N   | GLU | B | 223 | 131.651 | 67.355 | -98.953  | 1.00109.66 | B | N |
| ATOM | 2253 | CA  | GLU | B | 223 | 132.832 | 66.826 | -98.281  | 1.00109.66 | B | C |
| ATOM | 2254 | CB  | GLU | B | 223 | 132.754 | 65.298 | -98.192  | 1.00109.66 | B | C |
| ATOM | 2255 | CG  | GLU | B | 223 | 133.897 | 64.644 | -97.426  | 1.00109.66 | B | C |
| ATOM | 2256 | CD  | GLU | B | 223 | 135.137 | 64.441 | -98.275  | 1.00109.66 | B | C |
| ATOM | 2257 | OE1 | GLU | B | 223 | 135.039 | 64.560 | -99.515  | 1.00109.66 | B | O |
| ATOM | 2258 | OE2 | GLU | B | 223 | 136.212 | 64.162 | -97.703  | 1.00109.66 | B | O |
| ATOM | 2259 | C   | GLU | B | 223 | 134.103 | 67.258 | -99.006  | 1.00109.66 | B | C |
| ATOM | 2260 | O   | GLU | B | 223 | 135.180 | 67.316 | -98.412  | 1.00109.66 | B | O |
| ATOM | 2261 | N   | ARG | B | 224 | 133.967 | 67.568 | -100.291 | 1.00102.89 | B | N |
| ATOM | 2262 | CA  | ARG | B | 224 | 135.101 | 67.983 | -101.110 | 1.00102.89 | B | C |
| ATOM | 2263 | CB  | ARG | B | 224 | 134.643 | 68.300 | -102.536 | 1.00102.89 | B | C |
| ATOM | 2264 | CG  | ARG | B | 224 | 134.005 | 67.127 | -103.261 | 1.00102.89 | B | C |
| ATOM | 2265 | CD  | ARG | B | 224 | 133.554 | 67.521 | -104.658 | 1.00102.89 | B | C |
| ATOM | 2266 | NE  | ARG | B | 224 | 132.908 | 66.414 | -105.356 | 1.00102.89 | B | N |
| ATOM | 2267 | CZ  | ARG | B | 224 | 132.417 | 66.492 | -106.589 | 1.00102.89 | B | C |
| ATOM | 2268 | NH1 | ARG | B | 224 | 132.499 | 67.630 | -107.266 | 1.00102.89 | B | N |
| ATOM | 2269 | NH2 | ARG | B | 224 | 131.845 | 65.434 | -107.146 | 1.00102.89 | B | N |
| ATOM | 2270 | C   | ARG | B | 224 | 135.822 | 69.190 | -100.516 | 1.00102.89 | B | C |
| ATOM | 2271 | O   | ARG | B | 224 | 137.024 | 69.365 | -100.717 | 1.00102.89 | B | O |
| ATOM | 2272 | N   | TYR | B | 225 | 135.080 | 70.019 | -99.787  | 1.00235.34 | B | N |
| ATOM | 2273 | CA  | TYR | B | 225 | 135.642 | 71.215 | -99.167  | 1.00235.34 | B | C |
| ATOM | 2274 | CB  | TYR | B | 225 | 136.645 | 70.835 | -98.076  | 1.00235.34 | B | C |
| ATOM | 2275 | CG  | TYR | B | 225 | 136.049 | 70.029 | -96.944  | 1.00235.34 | B | C |
| ATOM | 2276 | CD1 | TYR | B | 225 | 134.693 | 70.097 | -96.656  | 1.00235.34 | B | C |
| ATOM | 2277 | CD2 | TYR | B | 225 | 136.844 | 69.198 | -96.166  | 1.00235.34 | B | C |
| ATOM | 2278 | CE1 | TYR | B | 225 | 134.145 | 69.361 | -95.623  | 1.00235.34 | B | C |
| ATOM | 2279 | CE2 | TYR | B | 225 | 136.305 | 68.458 | -95.131  | 1.00235.34 | B | C |
| ATOM | 2280 | CZ  | TYR | B | 225 | 134.955 | 68.543 | -94.864  | 1.00235.34 | B | C |
| ATOM | 2281 | OH  | TYR | B | 225 | 134.414 | 67.808 | -93.835  | 1.00235.34 | B | O |
| ATOM | 2282 | C   | TYR | B | 225 | 136.309 | 72.119 | -100.199 | 1.00235.34 | B | C |
| ATOM | 2283 | O   | TYR | B | 225 | 137.375 | 72.680 | -99.948  | 1.00235.34 | B | O |

|      |      |     |     |   |     |         |                |      |        |   |   |
|------|------|-----|-----|---|-----|---------|----------------|------|--------|---|---|
| ATOM | 2284 | N   | ALA | B | 226 | 135.675 | 72.255-101.359 | 1.00 | 79.48  | B | N |
| ATOM | 2285 | CA  | ALA | B | 226 | 136.208 | 73.092-102.428 | 1.00 | 79.48  | B | C |
| ATOM | 2286 | CB  | ALA | B | 226 | 135.621 | 72.678-103.769 | 1.00 | 79.48  | B | C |
| ATOM | 2287 | C   | ALA | B | 226 | 135.938 | 74.569-102.160 | 1.00 | 79.48  | B | C |
| ATOM | 2288 | O   | ALA | B | 226 | 136.843 | 75.399-102.240 | 1.00 | 79.48  | B | O |
| ATOM | 2289 | N   | VAL | B | 227 | 134.688 | 74.889-101.841 | 1.00 | 226.17 | B | N |
| ATOM | 2290 | CA  | VAL | B | 227 | 134.302 | 76.265-101.555 | 1.00 | 226.17 | B | C |
| ATOM | 2291 | CB  | VAL | B | 227 | 132.773 | 76.408-101.430 | 1.00 | 226.17 | B | C |
| ATOM | 2292 | CG1 | VAL | B | 227 | 132.400 | 77.841-101.083 | 1.00 | 226.17 | B | C |
| ATOM | 2293 | CG2 | VAL | B | 227 | 132.095 | 75.973-102.720 | 1.00 | 226.17 | B | C |
| ATOM | 2294 | C   | VAL | B | 227 | 134.961 | 76.763-100.272 | 1.00 | 226.17 | B | C |
| ATOM | 2295 | O   | VAL | B | 227 | 134.807 | 76.159-99.210  | 1.00 | 226.17 | B | O |
| ATOM | 2296 | N   | ALA | B | 228 | 135.696 | 77.865-100.378 | 1.00 | 52.15  | B | N |
| ATOM | 2297 | CA  | ALA | B | 228 | 136.386 | 78.441-99.230  | 1.00 | 52.15  | B | C |
| ATOM | 2298 | CB  | ALA | B | 228 | 137.314 | 79.559-99.676  | 1.00 | 52.15  | B | C |
| ATOM | 2299 | C   | ALA | B | 228 | 135.397 | 78.953-98.189  | 1.00 | 52.15  | B | C |
| ATOM | 2300 | O   | ALA | B | 228 | 135.681 | 78.943-96.991  | 1.00 | 52.15  | B | O |
| ATOM | 2301 | N   | PHE | B | 229 | 134.235 | 79.400-98.654  | 1.00 | 68.64  | B | N |
| ATOM | 2302 | CA  | PHE | B | 229 | 133.198 | 79.909-97.766  | 1.00 | 68.64  | B | C |
| ATOM | 2303 | CB  | PHE | B | 229 | 132.032 | 80.479-98.576  | 1.00 | 68.64  | B | C |
| ATOM | 2304 | CG  | PHE | B | 229 | 132.420 | 81.614-99.480  | 1.00 | 68.64  | B | C |
| ATOM | 2305 | CD1 | PHE | B | 229 | 132.377 | 82.922-99.029  | 1.00 | 68.64  | B | C |
| ATOM | 2306 | CD2 | PHE | B | 229 | 132.828 | 81.372-100.781 | 1.00 | 68.64  | B | C |
| ATOM | 2307 | CE1 | PHE | B | 229 | 132.733 | 83.968-99.858  | 1.00 | 68.64  | B | C |
| ATOM | 2308 | CE2 | PHE | B | 229 | 133.186 | 82.414-101.615 | 1.00 | 68.64  | B | C |
| ATOM | 2309 | CZ  | PHE | B | 229 | 133.138 | 83.713-101.153 | 1.00 | 68.64  | B | C |
| ATOM | 2310 | C   | PHE | B | 229 | 132.697 | 78.817-96.828  | 1.00 | 68.64  | B | C |
| ATOM | 2311 | O   | PHE | B | 229 | 132.391 | 79.077-95.664  | 1.00 | 68.64  | B | O |
| ATOM | 2312 | N   | PHE | B | 230 | 132.615 | 77.595-97.342  | 1.00 | 73.77  | B | N |
| ATOM | 2313 | CA  | PHE | B | 230 | 132.159 | 76.460-96.549  | 1.00 | 73.77  | B | C |
| ATOM | 2314 | CB  | PHE | B | 230 | 131.810 | 75.278-97.455  | 1.00 | 73.77  | B | C |
| ATOM | 2315 | CG  | PHE | B | 230 | 131.278 | 74.083-96.716  | 1.00 | 73.77  | B | C |
| ATOM | 2316 | CD1 | PHE | B | 230 | 129.931 | 73.983-96.414  | 1.00 | 73.77  | B | C |
| ATOM | 2317 | CD2 | PHE | B | 230 | 132.125 | 73.059-96.326  | 1.00 | 73.77  | B | C |
| ATOM | 2318 | CE1 | PHE | B | 230 | 129.438 | 72.885-95.735  | 1.00 | 73.77  | B | C |
| ATOM | 2319 | CE2 | PHE | B | 230 | 131.639 | 71.959-95.647  | 1.00 | 73.77  | B | C |
| ATOM | 2320 | CZ  | PHE | B | 230 | 130.293 | 71.872-95.351  | 1.00 | 73.77  | B | C |
| ATOM | 2321 | C   | PHE | B | 230 | 133.215 | 76.047-95.531  | 1.00 | 73.77  | B | C |
| ATOM | 2322 | O   | PHE | B | 230 | 132.890 | 75.611-94.427  | 1.00 | 73.77  | B | O |
| ATOM | 2323 | N   | CYS | B | 231 | 134.481 | 76.186-95.911  | 1.00 | 36.96  | B | N |
| ATOM | 2324 | CA  | CYS | B | 231 | 135.589 | 75.841-95.029  | 1.00 | 36.96  | B | C |
| ATOM | 2325 | CB  | CYS | B | 231 | 136.909 | 75.843-95.801  | 1.00 | 36.96  | B | C |
| ATOM | 2326 | SG  | CYS | B | 231 | 136.981 | 74.653-97.160  | 1.00 | 36.96  | B | S |
| ATOM | 2327 | C   | CYS | B | 231 | 135.668 | 76.805-93.850  | 1.00 | 36.96  | B | C |
| ATOM | 2328 | O   | CYS | B | 231 | 135.917 | 76.395-92.717  | 1.00 | 36.96  | B | O |
| ATOM | 2329 | N   | LEU | B | 232 | 135.455 | 78.087-94.127  | 1.00 | 104.38 | B | N |
| ATOM | 2330 | CA  | LEU | B | 232 | 135.484 | 79.109-93.087  | 1.00 | 104.38 | B | C |
| ATOM | 2331 | CB  | LEU | B | 232 | 135.514 | 80.507-93.708  | 1.00 | 104.38 | B | C |
| ATOM | 2332 | CG  | LEU | B | 232 | 136.721 | 80.835-94.590  | 1.00 | 104.38 | B | C |
| ATOM | 2333 | CD1 | LEU | B | 232 | 136.584 | 82.224-95.194  | 1.00 | 104.38 | B | C |
| ATOM | 2334 | CD2 | LEU | B | 232 | 138.013 | 80.715-93.797  | 1.00 | 104.38 | B | C |
| ATOM | 2335 | C   | LEU | B | 232 | 134.282 | 78.973-92.160  | 1.00 | 104.38 | B | C |
| ATOM | 2336 | O   | LEU | B | 232 | 134.402 | 79.129-90.945  | 1.00 | 104.38 | B | O |
| ATOM | 2337 | N   | ASP | B | 233 | 133.123 | 78.683-92.742  | 1.00 | 58.49  | B | N |
| ATOM | 2338 | CA  | ASP | B | 233 | 131.899 | 78.511-91.969  | 1.00 | 58.49  | B | C |
| ATOM | 2339 | CB  | ASP | B | 233 | 130.699 | 78.320-92.900  | 1.00 | 58.49  | B | C |
| ATOM | 2340 | CG  | ASP | B | 233 | 129.397 | 78.146-92.143  | 1.00 | 58.49  | B | C |
| ATOM | 2341 | OD1 | ASP | B | 233 | 129.269 | 78.715-91.039  | 1.00 | 58.49  | B | O |
| ATOM | 2342 | OD2 | ASP | B | 233 | 128.501 | 77.441-92.653  | 1.00 | 58.49  | B | O |
| ATOM | 2343 | C   | ASP | B | 233 | 132.017 | 77.325-91.017  | 1.00 | 58.49  | B | C |
| ATOM | 2344 | O   | ASP | B | 233 | 131.664 | 77.423-89.842  | 1.00 | 58.49  | B | O |
| ATOM | 2345 | N   | THR | B | 234 | 132.518 | 76.207-91.532  | 1.00 | 127.80 | B | N |
| ATOM | 2346 | CA  | THR | B | 234 | 132.701 | 75.005-90.727  | 1.00 | 127.80 | B | C |
| ATOM | 2347 | CB  | THR | B | 234 | 133.165 | 73.814-91.588  | 1.00 | 127.80 | B | C |
| ATOM | 2348 | OG1 | THR | B | 234 | 132.199 | 73.557-92.614  | 1.00 | 127.80 | B | O |
| ATOM | 2349 | CG2 | THR | B | 234 | 133.332 | 72.568-90.731  | 1.00 | 127.80 | B | C |
| ATOM | 2350 | C   | THR | B | 234 | 133.714 | 75.244-89.613  | 1.00 | 127.80 | B | C |
| ATOM | 2351 | O   | THR | B | 234 | 133.571 | 74.720-88.508  | 1.00 | 127.80 | B | O |

|      |      |     |     |   |     |         |        |         |      |        |   |   |
|------|------|-----|-----|---|-----|---------|--------|---------|------|--------|---|---|
| ATOM | 2352 | N   | ALA | B | 235 | 134.735 | 76.041 | -89.910 | 1.00 | 35.61  | B | N |
| ATOM | 2353 | CA  | ALA | B | 235 | 135.769 | 76.360 | -88.933 | 1.00 | 35.61  | B | C |
| ATOM | 2354 | CB  | ALA | B | 235 | 136.910 | 77.117 | -89.595 | 1.00 | 35.61  | B | C |
| ATOM | 2355 | C   | ALA | B | 235 | 135.197 | 77.166 | -87.771 | 1.00 | 35.61  | B | C |
| ATOM | 2356 | O   | ALA | B | 235 | 135.532 | 76.923 | -86.611 | 1.00 | 35.61  | B | O |
| ATOM | 2357 | N   | CYS | B | 236 | 134.333 | 78.124 | -88.089 | 1.00 | 41.29  | B | N |
| ATOM | 2358 | CA  | CYS | B | 236 | 133.707 | 78.960 | -87.072 | 1.00 | 41.29  | B | C |
| ATOM | 2359 | CB  | CYS | B | 236 | 132.985 | 80.144 | -87.719 | 1.00 | 41.29  | B | C |
| ATOM | 2360 | SG  | CYS | B | 236 | 134.063 | 81.261 | -88.647 | 1.00 | 41.29  | B | S |
| ATOM | 2361 | C   | CYS | B | 236 | 132.733 | 78.154 | -86.219 | 1.00 | 41.29  | B | C |
| ATOM | 2362 | O   | CYS | B | 236 | 132.752 | 78.239 | -84.991 | 1.00 | 41.29  | B | O |
| ATOM | 2363 | N   | VAL | B | 237 | 131.882 | 77.373 | -86.878 | 1.00 | 109.38 | B | N |
| ATOM | 2364 | CA  | VAL | B | 237 | 130.908 | 76.542 | -86.182 | 1.00 | 109.38 | B | C |
| ATOM | 2365 | CB  | VAL | B | 237 | 129.969 | 75.823 | -87.170 | 1.00 | 109.38 | B | C |
| ATOM | 2366 | CG1 | VAL | B | 237 | 129.024 | 74.892 | -86.425 | 1.00 | 109.38 | B | C |
| ATOM | 2367 | CG2 | VAL | B | 237 | 129.188 | 76.837 | -87.991 | 1.00 | 109.38 | B | C |
| ATOM | 2368 | C   | VAL | B | 237 | 131.603 | 75.507 | -85.303 | 1.00 | 109.38 | B | C |
| ATOM | 2369 | O   | VAL | B | 237 | 131.126 | 75.180 | -84.217 | 1.00 | 109.38 | B | O |
| ATOM | 2370 | N   | MET | B | 238 | 132.735 | 74.998 | -85.780 | 1.00 | 141.41 | B | N |
| ATOM | 2371 | CA  | MET | B | 238 | 133.511 | 74.015 | -85.032 | 1.00 | 141.41 | B | C |
| ATOM | 2372 | CB  | MET | B | 238 | 134.753 | 73.600 | -85.826 | 1.00 | 141.41 | B | C |
| ATOM | 2373 | CG  | MET | B | 238 | 135.553 | 72.460 | -85.207 | 1.00 | 141.41 | B | C |
| ATOM | 2374 | SD  | MET | B | 238 | 136.546 | 72.955 | -83.785 | 1.00 | 141.41 | B | S |
| ATOM | 2375 | CE  | MET | B | 238 | 137.333 | 71.402 | -83.365 | 1.00 | 141.41 | B | C |
| ATOM | 2376 | C   | MET | B | 238 | 133.911 | 74.573 | -83.672 | 1.00 | 141.41 | B | C |
| ATOM | 2377 | O   | MET | B | 238 | 133.698 | 73.935 | -82.641 | 1.00 | 141.41 | B | O |
| ATOM | 2378 | N   | ILE | B | 239 | 134.491 | 75.769 | -83.677 | 1.00 | 163.25 | B | N |
| ATOM | 2379 | CA  | ILE | B | 239 | 134.912 | 76.423 | -82.444 | 1.00 | 163.25 | B | C |
| ATOM | 2380 | CB  | ILE | B | 239 | 135.646 | 77.746 | -82.731 | 1.00 | 163.25 | B | C |
| ATOM | 2381 | CG2 | ILE | B | 239 | 136.083 | 78.407 | -81.432 | 1.00 | 163.25 | B | C |
| ATOM | 2382 | CG1 | ILE | B | 239 | 136.850 | 77.503 | -83.643 | 1.00 | 163.25 | B | C |
| ATOM | 2383 | CD1 | ILE | B | 239 | 137.873 | 76.551 | -83.062 | 1.00 | 163.25 | B | C |
| ATOM | 2384 | C   | ILE | B | 239 | 133.718 | 76.701 | -81.538 | 1.00 | 163.25 | B | C |
| ATOM | 2385 | O   | ILE | B | 239 | 133.786 | 76.498 | -80.326 | 1.00 | 163.25 | B | O |
| ATOM | 2386 | N   | PHE | B | 240 | 132.625 | 77.163 | -82.135 | 1.00 | 70.90  | B | N |
| ATOM | 2387 | CA  | PHE | B | 240 | 131.413 | 77.472 | -81.385 | 1.00 | 70.90  | B | C |
| ATOM | 2388 | CB  | PHE | B | 240 | 130.375 | 78.136 | -82.292 | 1.00 | 70.90  | B | C |
| ATOM | 2389 | CG  | PHE | B | 240 | 130.835 | 79.435 | -82.892 | 1.00 | 70.90  | B | C |
| ATOM | 2390 | CD1 | PHE | B | 240 | 131.845 | 80.171 | -82.294 | 1.00 | 70.90  | B | C |
| ATOM | 2391 | CD2 | PHE | B | 240 | 130.259 | 79.920 | -84.054 | 1.00 | 70.90  | B | C |
| ATOM | 2392 | CE1 | PHE | B | 240 | 132.270 | 81.366 | -82.843 | 1.00 | 70.90  | B | C |
| ATOM | 2393 | CE2 | PHE | B | 240 | 130.680 | 81.114 | -84.609 | 1.00 | 70.90  | B | C |
| ATOM | 2394 | CZ  | PHE | B | 240 | 131.687 | 81.838 | -84.002 | 1.00 | 70.90  | B | C |
| ATOM | 2395 | C   | PHE | B | 240 | 130.826 | 76.219 | -80.743 | 1.00 | 70.90  | B | C |
| ATOM | 2396 | O   | PHE | B | 240 | 130.285 | 76.272 | -79.638 | 1.00 | 70.90  | B | O |
| ATOM | 2397 | N   | THR | B | 241 | 130.937 | 75.094 | -81.442 | 1.00 | 101.68 | B | N |
| ATOM | 2398 | CA  | THR | B | 241 | 130.418 | 73.827 | -80.942 | 1.00 | 101.68 | B | C |
| ATOM | 2399 | CB  | THR | B | 241 | 130.399 | 72.750 | -82.043 | 1.00 | 101.68 | B | C |
| ATOM | 2400 | OG1 | THR | B | 241 | 129.544 | 73.171 | -83.112 | 1.00 | 101.68 | B | O |
| ATOM | 2401 | CG2 | THR | B | 241 | 129.893 | 71.427 | -81.486 | 1.00 | 101.68 | B | C |
| ATOM | 2402 | C   | THR | B | 241 | 131.240 | 73.323 | -79.761 | 1.00 | 101.68 | B | C |
| ATOM | 2403 | O   | THR | B | 241 | 130.689 | 72.873 | -78.756 | 1.00 | 101.68 | B | O |
| ATOM | 2404 | N   | VAL | B | 242 | 132.561 | 73.401 | -79.889 | 1.00 | 32.84  | B | N |
| ATOM | 2405 | CA  | VAL | B | 242 | 133.461 | 72.965 | -78.827 | 1.00 | 32.84  | B | C |
| ATOM | 2406 | CB  | VAL | B | 242 | 134.938 | 73.147 | -79.225 | 1.00 | 32.84  | B | C |
| ATOM | 2407 | CG1 | VAL | B | 242 | 135.849 | 72.795 | -78.060 | 1.00 | 32.84  | B | C |
| ATOM | 2408 | CG2 | VAL | B | 242 | 135.267 | 72.296 | -80.441 | 1.00 | 32.84  | B | C |
| ATOM | 2409 | C   | VAL | B | 242 | 133.189 | 73.725 | -77.533 | 1.00 | 32.84  | B | C |
| ATOM | 2410 | O   | VAL | B | 242 | 133.169 | 73.140 | -76.451 | 1.00 | 32.84  | B | O |
| ATOM | 2411 | N   | GLU | B | 243 | 132.977 | 75.032 | -77.653 | 1.00 | 57.64  | B | N |
| ATOM | 2412 | CA  | GLU | B | 243 | 132.681 | 75.867 | -76.496 | 1.00 | 57.64  | B | C |
| ATOM | 2413 | CB  | GLU | B | 243 | 132.551 | 77.333 | -76.912 | 1.00 | 57.64  | B | C |
| ATOM | 2414 | CG  | GLU | B | 243 | 133.811 | 77.917 | -77.530 | 1.00 | 57.64  | B | C |
| ATOM | 2415 | CD  | GLU | B | 243 | 133.638 | 79.364 | -77.947 | 1.00 | 57.64  | B | C |
| ATOM | 2416 | OE1 | GLU | B | 243 | 134.561 | 79.915 | -78.583 | 1.00 | 57.64  | B | O |
| ATOM | 2417 | OE2 | GLU | B | 243 | 132.579 | 79.951 | -77.638 | 1.00 | 57.64  | B | O |
| ATOM | 2418 | C   | GLU | B | 243 | 131.402 | 75.405 | -75.807 | 1.00 | 57.64  | B | C |
| ATOM | 2419 | O   | GLU | B | 243 | 131.306 | 75.416 | -74.580 | 1.00 | 57.64  | B | O |

|      |      |     |     |   |     |         |        |         |      |        |   |   |
|------|------|-----|-----|---|-----|---------|--------|---------|------|--------|---|---|
| ATOM | 2420 | N   | TYR | B | 244 | 130.421 | 74.999 | -76.607 | 1.00 | 53.95  | B | N |
| ATOM | 2421 | CA  | TYR | B | 244 | 129.150 | 74.518 | -76.079 | 1.00 | 53.95  | B | C |
| ATOM | 2422 | CB  | TYR | B | 244 | 128.125 | 74.371 | -77.206 | 1.00 | 53.95  | B | C |
| ATOM | 2423 | CG  | TYR | B | 244 | 126.832 | 73.714 | -76.776 | 1.00 | 53.95  | B | C |
| ATOM | 2424 | CD1 | TYR | B | 244 | 125.826 | 74.450 | -76.165 | 1.00 | 53.95  | B | C |
| ATOM | 2425 | CD2 | TYR | B | 244 | 126.617 | 72.358 | -76.983 | 1.00 | 53.95  | B | C |
| ATOM | 2426 | CE1 | TYR | B | 244 | 124.643 | 73.853 | -75.771 | 1.00 | 53.95  | B | C |
| ATOM | 2427 | CE2 | TYR | B | 244 | 125.438 | 71.753 | -76.593 | 1.00 | 53.95  | B | C |
| ATOM | 2428 | CZ  | TYR | B | 244 | 124.454 | 72.505 | -75.988 | 1.00 | 53.95  | B | C |
| ATOM | 2429 | OH  | TYR | B | 244 | 123.278 | 71.907 | -75.598 | 1.00 | 53.95  | B | O |
| ATOM | 2430 | C   | TYR | B | 244 | 129.319 | 73.190 | -75.348 | 1.00 | 53.95  | B | C |
| ATOM | 2431 | O   | TYR | B | 244 | 128.707 | 72.965 | -74.304 | 1.00 | 53.95  | B | O |
| ATOM | 2432 | N   | LEU | B | 245 | 130.152 | 72.316 | -75.901 | 1.00 | 44.50  | B | N |
| ATOM | 2433 | CA  | LEU | B | 245 | 130.383 | 71.000 | -75.316 | 1.00 | 44.50  | B | C |
| ATOM | 2434 | CB  | LEU | B | 245 | 131.095 | 70.087 | -76.317 | 1.00 | 44.50  | B | C |
| ATOM | 2435 | CG  | LEU | B | 245 | 130.355 | 69.812 | -77.627 | 1.00 | 44.50  | B | C |
| ATOM | 2436 | CD1 | LEU | B | 245 | 131.207 | 68.962 | -78.557 | 1.00 | 44.50  | B | C |
| ATOM | 2437 | CD2 | LEU | B | 245 | 129.016 | 69.141 | -77.358 | 1.00 | 44.50  | B | C |
| ATOM | 2438 | C   | LEU | B | 245 | 131.188 | 71.090 | -74.024 | 1.00 | 44.50  | B | C |
| ATOM | 2439 | O   | LEU | B | 245 | 130.922 | 70.367 | -73.063 | 1.00 | 44.50  | B | O |
| ATOM | 2440 | N   | LEU | B | 246 | 132.174 | 71.982 | -74.006 | 1.00 | 93.07  | B | N |
| ATOM | 2441 | CA  | LEU | B | 246 | 133.030 | 72.153 | -72.838 | 1.00 | 93.07  | B | C |
| ATOM | 2442 | CB  | LEU | B | 246 | 134.251 | 73.008 | -73.184 | 1.00 | 93.07  | B | C |
| ATOM | 2443 | CG  | LEU | B | 246 | 135.227 | 72.413 | -74.201 | 1.00 | 93.07  | B | C |
| ATOM | 2444 | CD1 | LEU | B | 246 | 136.356 | 73.387 | -74.498 | 1.00 | 93.07  | B | C |
| ATOM | 2445 | CD2 | LEU | B | 246 | 135.776 | 71.084 | -73.704 | 1.00 | 93.07  | B | C |
| ATOM | 2446 | C   | LEU | B | 246 | 132.272 | 72.767 | -71.665 | 1.00 | 93.07  | B | C |
| ATOM | 2447 | O   | LEU | B | 246 | 132.313 | 72.246 | -70.551 | 1.00 | 93.07  | B | O |
| ATOM | 2448 | N   | ARG | B | 247 | 131.582 | 73.874 | -71.921 | 1.00 | 110.03 | B | N |
| ATOM | 2449 | CA  | ARG | B | 247 | 130.823 | 74.557 | -70.878 | 1.00 | 110.03 | B | C |
| ATOM | 2450 | CB  | ARG | B | 247 | 130.288 | 75.899 | -71.384 | 1.00 | 110.03 | B | C |
| ATOM | 2451 | CG  | ARG | B | 247 | 131.365 | 76.922 | -71.707 | 1.00 | 110.03 | B | C |
| ATOM | 2452 | CD  | ARG | B | 247 | 130.759 | 78.296 | -71.949 | 1.00 | 110.03 | B | C |
| ATOM | 2453 | NE  | ARG | B | 247 | 131.773 | 79.303 | -72.249 | 1.00 | 110.03 | B | N |
| ATOM | 2454 | CZ  | ARG | B | 247 | 132.096 | 79.695 | -73.477 | 1.00 | 110.03 | B | C |
| ATOM | 2455 | NH1 | ARG | B | 247 | 131.482 | 79.167 | -74.526 | 1.00 | 110.03 | B | N |
| ATOM | 2456 | NH2 | ARG | B | 247 | 133.032 | 80.617 | -73.656 | 1.00 | 110.03 | B | N |
| ATOM | 2457 | C   | ARG | B | 247 | 129.675 | 73.694 | -70.361 | 1.00 | 110.03 | B | C |
| ATOM | 2458 | O   | ARG | B | 247 | 129.223 | 73.863 | -69.229 | 1.00 | 110.03 | B | O |
| ATOM | 2459 | N   | LEU | B | 248 | 129.208 | 72.772 | -71.196 | 1.00 | 148.40 | B | N |
| ATOM | 2460 | CA  | LEU | B | 248 | 128.116 | 71.883 | -70.819 | 1.00 | 148.40 | B | C |
| ATOM | 2461 | CB  | LEU | B | 248 | 127.533 | 71.196 | -72.056 | 1.00 | 148.40 | B | C |
| ATOM | 2462 | CG  | LEU | B | 248 | 126.328 | 70.282 | -71.825 | 1.00 | 148.40 | B | C |
| ATOM | 2463 | CD1 | LEU | B | 248 | 125.188 | 71.051 | -71.176 | 1.00 | 148.40 | B | C |
| ATOM | 2464 | CD2 | LEU | B | 248 | 125.876 | 69.648 | -73.131 | 1.00 | 148.40 | B | C |
| ATOM | 2465 | C   | LEU | B | 248 | 128.581 | 70.838 | -69.810 | 1.00 | 148.40 | B | C |
| ATOM | 2466 | O   | LEU | B | 248 | 127.794 | 70.350 | -68.999 | 1.00 | 148.40 | B | O |
| ATOM | 2467 | N   | ALA | B | 249 | 129.865 | 70.502 | -69.864 | 1.00 | 46.03  | B | N |
| ATOM | 2468 | CA  | ALA | B | 249 | 130.437 | 69.511 | -68.960 | 1.00 | 46.03  | B | C |
| ATOM | 2469 | CB  | ALA | B | 249 | 131.329 | 68.546 | -69.726 | 1.00 | 46.03  | B | C |
| ATOM | 2470 | C   | ALA | B | 249 | 131.215 | 70.174 | -67.829 | 1.00 | 46.03  | B | C |
| ATOM | 2471 | O   | ALA | B | 249 | 131.586 | 69.523 | -66.852 | 1.00 | 46.03  | B | O |
| ATOM | 2472 | N   | ALA | B | 250 | 131.461 | 71.473 | -67.968 | 1.00 | 55.13  | B | N |
| ATOM | 2473 | CA  | ALA | B | 250 | 132.191 | 72.227 | -66.956 | 1.00 | 55.13  | B | C |
| ATOM | 2474 | CB  | ALA | B | 250 | 133.131 | 73.226 | -67.613 | 1.00 | 55.13  | B | C |
| ATOM | 2475 | C   | ALA | B | 250 | 131.234 | 72.940 | -66.007 | 1.00 | 55.13  | B | C |
| ATOM | 2476 | O   | ALA | B | 250 | 131.629 | 73.379 | -64.926 | 1.00 | 55.13  | B | O |
| ATOM | 2477 | N   | ALA | B | 251 | 129.975 | 73.051 | -66.417 | 1.00 | 67.05  | B | N |
| ATOM | 2478 | CA  | ALA | B | 251 | 128.959 | 73.705 | -65.601 | 1.00 | 67.05  | B | C |
| ATOM | 2479 | CB  | ALA | B | 251 | 127.728 | 74.018 | -66.437 | 1.00 | 67.05  | B | C |
| ATOM | 2480 | C   | ALA | B | 251 | 128.584 | 72.847 | -64.398 | 1.00 | 67.05  | B | C |
| ATOM | 2481 | O   | ALA | B | 251 | 128.161 | 71.702 | -64.554 | 1.00 | 67.05  | B | O |
| ATOM | 2482 | N   | PRO | B | 252 | 128.742 | 73.405 | -63.188 | 1.00 | 163.88 | B | N |
| ATOM | 2483 | CA  | PRO | B | 252 | 128.414 | 72.712 | -61.938 | 1.00 | 163.88 | B | C |
| ATOM | 2484 | CD  | PRO | B | 252 | 129.288 | 74.751 | -62.946 | 1.00 | 163.88 | B | C |
| ATOM | 2485 | CB  | PRO | B | 252 | 128.604 | 73.801 | -60.879 | 1.00 | 163.88 | B | C |
| ATOM | 2486 | CG  | PRO | B | 252 | 129.597 | 74.733 | -61.479 | 1.00 | 163.88 | B | C |
| ATOM | 2487 | C   | PRO | B | 252 | 126.971 | 72.217 | -61.925 | 1.00 | 163.88 | B | C |



|      |      |     |     |   |     |         |        |         |            |   |   |
|------|------|-----|-----|---|-----|---------|--------|---------|------------|---|---|
| ATOM | 2488 | O   | PRO | B | 252 | 126.663 | 71.233 | -61.253 | 1.00163.88 | B | O |
| ATOM | 2489 | N   | SER | B | 253 | 126.101 | 72.898 | -62.664 | 1.00124.25 | B | N |
| ATOM | 2490 | CA  | SER | B | 253 | 124.694 | 72.521 | -62.734 | 1.00124.25 | B | C |
| ATOM | 2491 | CB  | SER | B | 253 | 123.812 | 73.634 | -62.164 | 1.00124.25 | B | C |
| ATOM | 2492 | OG  | SER | B | 253 | 122.441 | 73.281 | -62.225 | 1.00124.25 | B | O |
| ATOM | 2493 | C   | SER | B | 253 | 124.278 | 72.204 | -64.166 | 1.00124.25 | B | C |
| ATOM | 2494 | O   | SER | B | 253 | 124.661 | 72.905 | -65.104 | 1.00124.25 | B | O |
| ATOM | 2495 | N   | ARG | B | 254 | 123.491 | 71.145 | -64.329 | 1.00172.72 | B | N |
| ATOM | 2496 | CA  | ARG | B | 254 | 123.017 | 70.737 | -65.646 | 1.00172.72 | B | C |
| ATOM | 2497 | CB  | ARG | B | 254 | 123.212 | 69.233 | -65.843 | 1.00172.72 | B | C |
| ATOM | 2498 | CG  | ARG | B | 254 | 124.664 | 68.787 | -65.824 | 1.00172.72 | B | C |
| ATOM | 2499 | CD  | ARG | B | 254 | 125.454 | 69.438 | -66.947 | 1.00172.72 | B | C |
| ATOM | 2500 | NE  | ARG | B | 254 | 124.910 | 69.106 | -68.261 | 1.00172.72 | B | N |
| ATOM | 2501 | CZ  | ARG | B | 254 | 125.285 | 68.054 | -68.981 | 1.00172.72 | B | C |
| ATOM | 2502 | NH1 | ARG | B | 254 | 126.211 | 67.226 | -68.516 | 1.00172.72 | B | N |
| ATOM | 2503 | NH2 | ARG | B | 254 | 124.736 | 67.829 | -70.166 | 1.00172.72 | B | N |
| ATOM | 2504 | C   | ARG | B | 254 | 121.551 | 71.106 | -65.845 | 1.00172.72 | B | C |
| ATOM | 2505 | O   | ARG | B | 254 | 120.989 | 70.893 | -66.919 | 1.00172.72 | B | O |
| ATOM | 2506 | N   | TYR | B | 255 | 120.936 | 71.658 | -64.804 | 1.00 99.39 | B | N |
| ATOM | 2507 | CA  | TYR | B | 255 | 119.536 | 72.060 | -64.869 | 1.00 99.39 | B | C |
| ATOM | 2508 | CB  | TYR | B | 255 | 118.792 | 71.620 | -63.606 | 1.00 99.39 | B | C |
| ATOM | 2509 | CG  | TYR | B | 255 | 117.299 | 71.858 | -63.658 | 1.00 99.39 | B | C |
| ATOM | 2510 | CD1 | TYR | B | 255 | 116.446 | 70.917 | -64.220 | 1.00 99.39 | B | C |
| ATOM | 2511 | CD2 | TYR | B | 255 | 116.743 | 73.021 | -63.144 | 1.00 99.39 | B | C |
| ATOM | 2512 | CE1 | TYR | B | 255 | 115.082 | 71.129 | -64.270 | 1.00 99.39 | B | C |
| ATOM | 2513 | CE2 | TYR | B | 255 | 115.380 | 73.242 | -63.190 | 1.00 99.39 | B | C |
| ATOM | 2514 | CZ  | TYR | B | 255 | 114.554 | 72.293 | -63.753 | 1.00 99.39 | B | C |
| ATOM | 2515 | OH  | TYR | B | 255 | 113.196 | 72.508 | -63.800 | 1.00 99.39 | B | O |
| ATOM | 2516 | C   | TYR | B | 255 | 119.411 | 73.568 | -65.057 | 1.00 99.39 | B | C |
| ATOM | 2517 | O   | TYR | B | 255 | 118.414 | 74.057 | -65.589 | 1.00 99.39 | B | O |
| ATOM | 2518 | N   | ARG | B | 256 | 120.430 | 74.301 | -64.620 | 1.00167.77 | B | N |
| ATOM | 2519 | CA  | ARG | B | 256 | 120.445 | 75.753 | -64.753 | 1.00167.77 | B | C |
| ATOM | 2520 | CB  | ARG | B | 256 | 121.116 | 76.395 | -63.538 | 1.00167.77 | B | C |
| ATOM | 2521 | CG  | ARG | B | 256 | 120.399 | 76.139 | -62.223 | 1.00167.77 | B | C |
| ATOM | 2522 | CD  | ARG | B | 256 | 121.142 | 76.777 | -61.059 | 1.00167.77 | B | C |
| ATOM | 2523 | NE  | ARG | B | 256 | 121.335 | 78.211 | -61.254 | 1.00167.77 | B | N |
| ATOM | 2524 | CZ  | ARG | B | 256 | 120.478 | 79.142 | -60.848 | 1.00167.77 | B | C |
| ATOM | 2525 | NH1 | ARG | B | 256 | 119.362 | 78.793 | -60.222 | 1.00167.77 | B | N |
| ATOM | 2526 | NH2 | ARG | B | 256 | 120.735 | 80.424 | -61.069 | 1.00167.77 | B | N |
| ATOM | 2527 | C   | ARG | B | 256 | 121.159 | 76.181 | -66.031 | 1.00167.77 | B | C |
| ATOM | 2528 | O   | ARG | B | 256 | 121.351 | 77.372 | -66.277 | 1.00167.77 | B | O |
| ATOM | 2529 | N   | PHE | B | 257 | 121.551 | 75.202 | -66.839 | 1.00 86.55 | B | N |
| ATOM | 2530 | CA  | PHE | B | 257 | 122.254 | 75.473 | -68.088 | 1.00 86.55 | B | C |
| ATOM | 2531 | CB  | PHE | B | 257 | 122.944 | 74.206 | -68.600 | 1.00 86.55 | B | C |
| ATOM | 2532 | CG  | PHE | B | 257 | 123.666 | 74.395 | -69.904 | 1.00 86.55 | B | C |
| ATOM | 2533 | CD1 | PHE | B | 257 | 124.966 | 74.871 | -69.928 | 1.00 86.55 | B | C |
| ATOM | 2534 | CD2 | PHE | B | 257 | 123.045 | 74.093 | -71.105 | 1.00 86.55 | B | C |
| ATOM | 2535 | CE1 | PHE | B | 257 | 125.634 | 75.044 | -71.127 | 1.00 86.55 | B | C |
| ATOM | 2536 | CE2 | PHE | B | 257 | 123.707 | 74.264 | -72.306 | 1.00 86.55 | B | C |
| ATOM | 2537 | CZ  | PHE | B | 257 | 125.003 | 74.740 | -72.317 | 1.00 86.55 | B | C |
| ATOM | 2538 | C   | PHE | B | 257 | 121.308 | 76.021 | -69.151 | 1.00 86.55 | B | C |
| ATOM | 2539 | O   | PHE | B | 257 | 121.603 | 77.024 | -69.799 | 1.00 86.55 | B | O |
| ATOM | 2540 | N   | VAL | B | 258 | 120.171 | 75.356 | -69.323 | 1.00126.69 | B | N |
| ATOM | 2541 | CA  | VAL | B | 258 | 119.191 | 75.762 | -70.324 | 1.00126.69 | B | C |
| ATOM | 2542 | CB  | VAL | B | 258 | 118.208 | 74.621 | -70.645 | 1.00126.69 | B | C |
| ATOM | 2543 | CG1 | VAL | B | 258 | 118.949 | 73.439 | -71.252 | 1.00126.69 | B | C |
| ATOM | 2544 | CG2 | VAL | B | 258 | 117.454 | 74.203 | -69.392 | 1.00126.69 | B | C |
| ATOM | 2545 | C   | VAL | B | 258 | 118.401 | 76.987 | -69.873 | 1.00126.69 | B | C |
| ATOM | 2546 | O   | VAL | B | 258 | 117.552 | 77.493 | -70.607 | 1.00126.69 | B | O |
| ATOM | 2547 | N   | ARG | B | 259 | 118.685 | 77.459 | -68.664 | 1.00166.93 | B | N |
| ATOM | 2548 | CA  | ARG | B | 259 | 117.998 | 78.624 | -68.118 | 1.00166.93 | B | C |
| ATOM | 2549 | CB  | ARG | B | 259 | 117.856 | 78.501 | -66.599 | 1.00166.93 | B | C |
| ATOM | 2550 | CG  | ARG | B | 259 | 117.090 | 79.644 | -65.953 | 1.00166.93 | B | C |
| ATOM | 2551 | CD  | ARG | B | 259 | 117.000 | 79.469 | -64.447 | 1.00166.93 | B | C |
| ATOM | 2552 | NE  | ARG | B | 259 | 116.219 | 80.531 | -63.819 | 1.00166.93 | B | N |
| ATOM | 2553 | CZ  | ARG | B | 259 | 116.731 | 81.679 | -63.386 | 1.00166.93 | B | C |
| ATOM | 2554 | NH1 | ARG | B | 259 | 118.030 | 81.917 | -63.511 | 1.00166.93 | B | N |
| ATOM | 2555 | NH2 | ARG | B | 259 | 115.945 | 82.589 | -62.827 | 1.00166.93 | B | N |

|      |      |     |     |   |     |         |        |         |      |        |   |   |
|------|------|-----|-----|---|-----|---------|--------|---------|------|--------|---|---|
| ATOM | 2556 | C   | ARG | B | 259 | 118.727 | 79.916 | -68.472 | 1.00 | 166.93 | B | C |
| ATOM | 2557 | O   | ARG | B | 259 | 118.102 | 80.956 | -68.677 | 1.00 | 166.93 | B | O |
| ATOM | 2558 | N   | SER | B | 260 | 120.053 | 79.842 | -68.543 | 1.00 | 90.97  | B | N |
| ATOM | 2559 | CA  | SER | B | 260 | 120.868 | 81.008 | -68.865 | 1.00 | 90.97  | B | C |
| ATOM | 2560 | CB  | SER | B | 260 | 122.356 | 80.676 | -68.726 | 1.00 | 90.97  | B | C |
| ATOM | 2561 | OG  | SER | B | 260 | 122.667 | 80.273 | -67.404 | 1.00 | 90.97  | B | O |
| ATOM | 2562 | C   | SER | B | 260 | 120.573 | 81.518 | -70.271 | 1.00 | 90.97  | B | C |
| ATOM | 2563 | O   | SER | B | 260 | 120.255 | 80.740 | -71.170 | 1.00 | 90.97  | B | O |
| ATOM | 2564 | N   | VAL | B | 261 | 120.679 | 82.831 | -70.454 | 1.00 | 94.76  | B | N |
| ATOM | 2565 | CA  | VAL | B | 261 | 120.415 | 83.447 | -71.749 | 1.00 | 94.76  | B | C |
| ATOM | 2566 | CB  | VAL | B | 261 | 119.941 | 84.906 | -71.595 | 1.00 | 94.76  | B | C |
| ATOM | 2567 | CG1 | VAL | B | 261 | 118.601 | 84.957 | -70.878 | 1.00 | 94.76  | B | C |
| ATOM | 2568 | CG2 | VAL | B | 261 | 120.984 | 85.729 | -70.852 | 1.00 | 94.76  | B | C |
| ATOM | 2569 | C   | VAL | B | 261 | 121.648 | 83.412 | -72.647 | 1.00 | 94.76  | B | C |
| ATOM | 2570 | O   | VAL | B | 261 | 121.536 | 83.458 | -73.871 | 1.00 | 94.76  | B | O |
| ATOM | 2571 | N   | MET | B | 262 | 122.823 | 83.331 | -72.030 | 1.00 | 60.02  | B | N |
| ATOM | 2572 | CA  | MET | B | 262 | 124.075 | 83.286 | -72.775 | 1.00 | 60.02  | B | C |
| ATOM | 2573 | CB  | MET | B | 262 | 125.261 | 83.577 | -71.852 | 1.00 | 60.02  | B | C |
| ATOM | 2574 | CG  | MET | B | 262 | 125.232 | 84.961 | -71.224 | 1.00 | 60.02  | B | C |
| ATOM | 2575 | SD  | MET | B | 262 | 125.232 | 86.279 | -72.455 | 1.00 | 60.02  | B | S |
| ATOM | 2576 | CE  | MET | B | 262 | 125.215 | 87.727 | -71.402 | 1.00 | 60.02  | B | C |
| ATOM | 2577 | C   | MET | B | 262 | 124.260 | 81.934 | -73.457 | 1.00 | 60.02  | B | C |
| ATOM | 2578 | O   | MET | B | 262 | 124.819 | 81.851 | -74.551 | 1.00 | 60.02  | B | O |
| ATOM | 2579 | N   | SER | B | 263 | 123.785 | 80.879 | -72.804 | 1.00 | 83.90  | B | N |
| ATOM | 2580 | CA  | SER | B | 263 | 123.891 | 79.530 | -73.345 | 1.00 | 83.90  | B | C |
| ATOM | 2581 | CB  | SER | B | 263 | 123.516 | 78.497 | -72.282 | 1.00 | 83.90  | B | C |
| ATOM | 2582 | OG  | SER | B | 263 | 122.179 | 78.676 | -71.850 | 1.00 | 83.90  | B | O |
| ATOM | 2583 | C   | SER | B | 263 | 123.003 | 79.359 | -74.573 | 1.00 | 83.90  | B | C |
| ATOM | 2584 | O   | SER | B | 263 | 123.391 | 78.714 | -75.546 | 1.00 | 83.90  | B | O |
| ATOM | 2585 | N   | ILE | B | 264 | 121.809 | 79.941 | -74.518 | 1.00 | 88.68  | B | N |
| ATOM | 2586 | CA  | ILE | B | 264 | 120.863 | 79.861 | -75.624 | 1.00 | 88.68  | B | C |
| ATOM | 2587 | CB  | ILE | B | 264 | 119.548 | 80.592 | -75.295 | 1.00 | 88.68  | B | C |
| ATOM | 2588 | CG2 | ILE | B | 264 | 118.572 | 80.486 | -76.457 | 1.00 | 88.68  | B | C |
| ATOM | 2589 | CG1 | ILE | B | 264 | 118.929 | 80.026 | -74.016 | 1.00 | 88.68  | B | C |
| ATOM | 2590 | CD1 | ILE | B | 264 | 118.587 | 78.554 | -74.102 | 1.00 | 88.68  | B | C |
| ATOM | 2591 | C   | ILE | B | 264 | 121.457 | 80.452 | -76.899 | 1.00 | 88.68  | B | C |
| ATOM | 2592 | O   | ILE | B | 264 | 121.303 | 79.893 | -77.985 | 1.00 | 88.68  | B | O |
| ATOM | 2593 | N   | ILE | B | 265 | 122.137 | 81.585 | -76.757 | 1.00 | 113.98 | B | N |
| ATOM | 2594 | CA  | ILE | B | 265 | 122.769 | 82.249 | -77.891 | 1.00 | 113.98 | B | C |
| ATOM | 2595 | CB  | ILE | B | 265 | 123.414 | 83.584 | -77.475 | 1.00 | 113.98 | B | C |
| ATOM | 2596 | CG2 | ILE | B | 265 | 124.050 | 84.268 | -78.675 | 1.00 | 113.98 | B | C |
| ATOM | 2597 | CG1 | ILE | B | 265 | 122.374 | 84.498 | -76.822 | 1.00 | 113.98 | B | C |
| ATOM | 2598 | CD1 | ILE | B | 265 | 122.927 | 85.836 | -76.382 | 1.00 | 113.98 | B | C |
| ATOM | 2599 | C   | ILE | B | 265 | 123.829 | 81.354 | -78.524 | 1.00 | 113.98 | B | C |
| ATOM | 2600 | O   | ILE | B | 265 | 123.984 | 81.325 | -79.744 | 1.00 | 113.98 | B | O |
| ATOM | 2601 | N   | ASP | B | 266 | 124.556 | 80.623 | -77.685 | 1.00 | 68.21  | B | N |
| ATOM | 2602 | CA  | ASP | B | 266 | 125.592 | 79.714 | -78.160 | 1.00 | 68.21  | B | C |
| ATOM | 2603 | CB  | ASP | B | 266 | 126.433 | 79.202 | -76.990 | 1.00 | 68.21  | B | C |
| ATOM | 2604 | CG  | ASP | B | 266 | 127.111 | 80.322 | -76.225 | 1.00 | 68.21  | B | C |
| ATOM | 2605 | OD1 | ASP | B | 266 | 127.430 | 81.358 | -76.845 | 1.00 | 68.21  | B | O |
| ATOM | 2606 | OD2 | ASP | B | 266 | 127.325 | 80.166 | -75.005 | 1.00 | 68.21  | B | O |
| ATOM | 2607 | C   | ASP | B | 266 | 124.983 | 78.542 | -78.922 | 1.00 | 68.21  | B | C |
| ATOM | 2608 | O   | ASP | B | 266 | 125.623 | 77.956 | -79.795 | 1.00 | 68.21  | B | O |
| ATOM | 2609 | N   | VAL | B | 267 | 123.741 | 78.205 | -78.586 | 1.00 | 104.56 | B | N |
| ATOM | 2610 | CA  | VAL | B | 267 | 123.041 | 77.106 | -79.240 | 1.00 | 104.56 | B | C |
| ATOM | 2611 | CB  | VAL | B | 267 | 121.854 | 76.609 | -78.393 | 1.00 | 104.56 | B | C |
| ATOM | 2612 | CG1 | VAL | B | 267 | 121.100 | 75.511 | -79.127 | 1.00 | 104.56 | B | C |
| ATOM | 2613 | CG2 | VAL | B | 267 | 122.338 | 76.118 | -77.038 | 1.00 | 104.56 | B | C |
| ATOM | 2614 | C   | VAL | B | 267 | 122.531 | 77.518 | -80.617 | 1.00 | 104.56 | B | C |
| ATOM | 2615 | O   | VAL | B | 267 | 122.791 | 76.844 | -81.613 | 1.00 | 104.56 | B | O |
| ATOM | 2616 | N   | VAL | B | 268 | 121.809 | 78.633 | -80.665 | 1.00 | 100.82 | B | N |
| ATOM | 2617 | CA  | VAL | B | 268 | 121.243 | 79.133 | -81.913 | 1.00 | 100.82 | B | C |
| ATOM | 2618 | CB  | VAL | B | 268 | 120.349 | 80.365 | -81.667 | 1.00 | 100.82 | B | C |
| ATOM | 2619 | CG1 | VAL | B | 268 | 119.666 | 80.798 | -82.955 | 1.00 | 100.82 | B | C |
| ATOM | 2620 | CG2 | VAL | B | 268 | 119.316 | 80.063 | -80.592 | 1.00 | 100.82 | B | C |
| ATOM | 2621 | C   | VAL | B | 268 | 122.339 | 79.492 | -82.914 | 1.00 | 100.82 | B | C |
| ATOM | 2622 | O   | VAL | B | 268 | 122.087 | 79.604 | -84.114 | 1.00 | 100.82 | B | O |
| ATOM | 2623 | N   | ALA | B | 269 | 123.558 | 79.664 | -82.414 | 1.00 | 69.40  | B | N |

|      |      |     |     |   |     |         |        |         |      |        |   |   |
|------|------|-----|-----|---|-----|---------|--------|---------|------|--------|---|---|
| ATOM | 2624 | CA  | ALA | B | 269 | 124.686 | 80.040 | -83.258 | 1.00 | 69.40  | B | C |
| ATOM | 2625 | CB  | ALA | B | 269 | 125.784 | 80.680 | -82.421 | 1.00 | 69.40  | B | C |
| ATOM | 2626 | C   | ALA | B | 269 | 125.237 | 78.853 | -84.044 | 1.00 | 69.40  | B | C |
| ATOM | 2627 | O   | ALA | B | 269 | 126.136 | 79.011 | -84.870 | 1.00 | 69.40  | B | O |
| ATOM | 2628 | N   | ILE | B | 270 | 124.697 | 77.665 | -83.786 | 1.00 | 105.76 | B | N |
| ATOM | 2629 | CA  | ILE | B | 270 | 125.159 | 76.456 | -84.461 | 1.00 | 105.76 | B | C |
| ATOM | 2630 | CB  | ILE | B | 270 | 126.045 | 75.594 | -83.538 | 1.00 | 105.76 | B | C |
| ATOM | 2631 | CG2 | ILE | B | 270 | 127.265 | 76.378 | -83.080 | 1.00 | 105.76 | B | C |
| ATOM | 2632 | CG1 | ILE | B | 270 | 125.239 | 75.093 | -82.338 | 1.00 | 105.76 | B | C |
| ATOM | 2633 | CD1 | ILE | B | 270 | 126.042 | 74.251 | -81.371 | 1.00 | 105.76 | B | C |
| ATOM | 2634 | C   | ILE | B | 270 | 124.005 | 75.602 | -84.979 | 1.00 | 105.76 | B | C |
| ATOM | 2635 | O   | ILE | B | 270 | 124.218 | 74.644 | -85.722 | 1.00 | 105.76 | B | O |
| ATOM | 2636 | N   | LEU | B | 271 | 122.784 | 75.951 | -84.586 | 1.00 | 71.73  | B | N |
| ATOM | 2637 | CA  | LEU | B | 271 | 121.602 | 75.201 | -85.004 | 1.00 | 71.73  | B | C |
| ATOM | 2638 | CB  | LEU | B | 271 | 120.347 | 75.709 | -84.287 | 1.00 | 71.73  | B | C |
| ATOM | 2639 | CG  | LEU | B | 271 | 120.274 | 75.472 | -82.778 | 1.00 | 71.73  | B | C |
| ATOM | 2640 | CD1 | LEU | B | 271 | 119.005 | 76.080 | -82.200 | 1.00 | 71.73  | B | C |
| ATOM | 2641 | CD2 | LEU | B | 271 | 120.352 | 73.985 | -82.466 | 1.00 | 71.73  | B | C |
| ATOM | 2642 | C   | LEU | B | 271 | 121.392 | 75.207 | -86.521 | 1.00 | 71.73  | B | C |
| ATOM | 2643 | O   | LEU | B | 271 | 121.235 | 74.148 | -87.127 | 1.00 | 71.73  | B | O |
| ATOM | 2644 | N   | PRO | B | 272 | 121.386 | 76.401 | -87.139 | 1.00 | 85.42  | B | N |
| ATOM | 2645 | CA  | PRO | B | 272 | 121.162 | 76.489 | -88.587 | 1.00 | 85.42  | B | C |
| ATOM | 2646 | CD  | PRO | B | 272 | 121.543 | 77.732 | -86.528 | 1.00 | 85.42  | B | C |
| ATOM | 2647 | CB  | PRO | B | 272 | 121.360 | 77.980 | -88.877 | 1.00 | 85.42  | B | C |
| ATOM | 2648 | CG  | PRO | B | 272 | 121.039 | 78.656 | -87.594 | 1.00 | 85.42  | B | C |
| ATOM | 2649 | C   | PRO | B | 272 | 122.167 | 75.665 | -89.387 | 1.00 | 85.42  | B | C |
| ATOM | 2650 | O   | PRO | B | 272 | 121.884 | 75.290 | -90.525 | 1.00 | 85.42  | B | O |
| ATOM | 2651 | N   | TYR | B | 273 | 123.325 | 75.390 | -88.796 | 1.00 | 80.36  | B | N |
| ATOM | 2652 | CA  | TYR | B | 273 | 124.367 | 74.629 | -89.475 | 1.00 | 80.36  | B | C |
| ATOM | 2653 | CB  | TYR | B | 273 | 125.701 | 74.771 | -88.740 | 1.00 | 80.36  | B | C |
| ATOM | 2654 | CG  | TYR | B | 273 | 126.848 | 74.044 | -89.406 | 1.00 | 80.36  | B | C |
| ATOM | 2655 | CD1 | TYR | B | 273 | 127.587 | 74.649 | -90.413 | 1.00 | 80.36  | B | C |
| ATOM | 2656 | CD2 | TYR | B | 273 | 127.192 | 72.753 | -89.027 | 1.00 | 80.36  | B | C |
| ATOM | 2657 | CE1 | TYR | B | 273 | 128.636 | 73.989 | -91.026 | 1.00 | 80.36  | B | C |
| ATOM | 2658 | CE2 | TYR | B | 273 | 128.239 | 72.085 | -89.633 | 1.00 | 80.36  | B | C |
| ATOM | 2659 | CZ  | TYR | B | 273 | 128.957 | 72.708 | -90.631 | 1.00 | 80.36  | B | C |
| ATOM | 2660 | OH  | TYR | B | 273 | 130.001 | 72.047 | -91.238 | 1.00 | 80.36  | B | O |
| ATOM | 2661 | C   | TYR | B | 273 | 123.993 | 73.155 | -89.603 | 1.00 | 80.36  | B | C |
| ATOM | 2662 | O   | TYR | B | 273 | 123.974 | 72.603 | -90.703 | 1.00 | 80.36  | B | O |
| ATOM | 2663 | N   | TYR | B | 274 | 123.697 | 72.524 | -88.472 | 1.00 | 58.29  | B | N |
| ATOM | 2664 | CA  | TYR | B | 274 | 123.348 | 71.108 | -88.454 | 1.00 | 58.29  | B | C |
| ATOM | 2665 | CB  | TYR | B | 274 | 123.353 | 70.572 | -87.021 | 1.00 | 58.29  | B | C |
| ATOM | 2666 | CG  | TYR | B | 274 | 124.713 | 70.607 | -86.362 | 1.00 | 58.29  | B | C |
| ATOM | 2667 | CD1 | TYR | B | 274 | 125.116 | 71.704 | -85.613 | 1.00 | 58.29  | B | C |
| ATOM | 2668 | CD2 | TYR | B | 274 | 125.596 | 69.543 | -86.493 | 1.00 | 58.29  | B | C |
| ATOM | 2669 | CE1 | TYR | B | 274 | 126.360 | 71.741 | -85.011 | 1.00 | 58.29  | B | C |
| ATOM | 2670 | CE2 | TYR | B | 274 | 126.841 | 69.571 | -85.895 | 1.00 | 58.29  | B | C |
| ATOM | 2671 | CZ  | TYR | B | 274 | 127.218 | 70.671 | -85.155 | 1.00 | 58.29  | B | C |
| ATOM | 2672 | OH  | TYR | B | 274 | 128.457 | 70.702 | -84.558 | 1.00 | 58.29  | B | O |
| ATOM | 2673 | C   | TYR | B | 274 | 121.994 | 70.849 | -89.107 | 1.00 | 58.29  | B | C |
| ATOM | 2674 | O   | TYR | B | 274 | 121.838 | 69.902 | -89.877 | 1.00 | 58.29  | B | O |
| ATOM | 2675 | N   | ILE | B | 275 | 121.019 | 71.697 | -88.795 | 1.00 | 98.26  | B | N |
| ATOM | 2676 | CA  | ILE | B | 275 | 119.675 | 71.555 | -89.345 | 1.00 | 98.26  | B | C |
| ATOM | 2677 | CB  | ILE | B | 275 | 118.714 | 72.611 | -88.767 | 1.00 | 98.26  | B | C |
| ATOM | 2678 | CG2 | ILE | B | 275 | 117.337 | 72.482 | -89.399 | 1.00 | 98.26  | B | C |
| ATOM | 2679 | CG1 | ILE | B | 275 | 118.619 | 72.471 | -87.246 | 1.00 | 98.26  | B | C |
| ATOM | 2680 | CD1 | ILE | B | 275 | 117.704 | 73.485 | -86.595 | 1.00 | 98.26  | B | C |
| ATOM | 2681 | C   | ILE | B | 275 | 119.682 | 71.659 | -90.867 | 1.00 | 98.26  | B | C |
| ATOM | 2682 | O   | ILE | B | 275 | 118.997 | 70.900 | -91.553 | 1.00 | 98.26  | B | O |
| ATOM | 2683 | N   | GLY | B | 276 | 120.461 | 72.601 | -91.389 | 1.00 | 33.27  | B | N |
| ATOM | 2684 | CA  | GLY | B | 276 | 120.550 | 72.808 | -92.822 | 1.00 | 33.27  | B | C |
| ATOM | 2685 | C   | GLY | B | 276 | 121.167 | 71.631 | -93.552 | 1.00 | 33.27  | B | C |
| ATOM | 2686 | O   | GLY | B | 276 | 120.709 | 71.248 | -94.629 | 1.00 | 33.27  | B | O |
| ATOM | 2687 | N   | LEU | B | 277 | 122.209 | 71.054 | -92.963 | 1.00 | 135.89 | B | N |
| ATOM | 2688 | CA  | LEU | B | 277 | 122.906 | 69.926 | -93.572 | 1.00 | 135.89 | B | C |
| ATOM | 2689 | CB  | LEU | B | 277 | 124.169 | 69.585 | -92.778 | 1.00 | 135.89 | B | C |
| ATOM | 2690 | CG  | LEU | B | 277 | 124.999 | 68.411 | -93.301 | 1.00 | 135.89 | B | C |
| ATOM | 2691 | CD1 | LEU | B | 277 | 125.405 | 68.642 | -94.749 | 1.00 | 135.89 | B | C |

|      |      |     |     |   |     |         |        |          |            |       |   |   |
|------|------|-----|-----|---|-----|---------|--------|----------|------------|-------|---|---|
| ATOM | 2692 | CD2 | LEU | B | 277 | 126.223 | 68.188 | -92.427  | 1.00135.89 | B     | C |   |
| ATOM | 2693 | C   | LEU | B | 277 | 122.006 | 68.700 | -93.676  | 1.00135.89 | B     | C |   |
| ATOM | 2694 | O   | LEU | B | 277 | 122.047 | 67.970 | -94.666  | 1.00135.89 | B     | O |   |
| ATOM | 2695 | N   | VAL | B | 278 | 121.193 | 68.478 | -92.648  | 1.00       | 91.77 | B | N |
| ATOM | 2696 | CA  | VAL | B | 278 | 120.295 | 67.330 | -92.616  | 1.00       | 91.77 | B | C |
| ATOM | 2697 | CB  | VAL | B | 278 | 119.747 | 67.082 | -91.198  | 1.00       | 91.77 | B | C |
| ATOM | 2698 | CG1 | VAL | B | 278 | 118.773 | 65.914 | -91.202  | 1.00       | 91.77 | B | C |
| ATOM | 2699 | CG2 | VAL | B | 278 | 120.888 | 66.830 | -90.225  | 1.00       | 91.77 | B | C |
| ATOM | 2700 | C   | VAL | B | 278 | 119.126 | 67.508 | -93.580  | 1.00       | 91.77 | B | C |
| ATOM | 2701 | O   | VAL | B | 278 | 118.755 | 66.580 | -94.298  | 1.00       | 91.77 | B | O |
| ATOM | 2702 | N   | MET | B | 279 | 118.552 | 68.707 | -93.591  | 1.00131.98 | B     | N |   |
| ATOM | 2703 | CA  | MET | B | 279 | 117.404 | 68.998 | -94.441  | 1.00131.98 | B     | C |   |
| ATOM | 2704 | CB  | MET | B | 279 | 116.849 | 70.392 | -94.139  | 1.00131.98 | B     | C |   |
| ATOM | 2705 | CG  | MET | B | 279 | 115.621 | 70.760 | -94.956  | 1.00131.98 | B     | C |   |
| ATOM | 2706 | SD  | MET | B | 279 | 114.960 | 72.383 | -94.533  | 1.00131.98 | B     | S |   |
| ATOM | 2707 | CE  | MET | B | 279 | 114.535 | 72.141 | -92.810  | 1.00131.98 | B     | C |   |
| ATOM | 2708 | C   | MET | B | 279 | 117.751 | 68.879 | -95.923  | 1.00131.98 | B     | C |   |
| ATOM | 2709 | O   | MET | B | 279 | 117.029 | 68.241 | -96.688  | 1.00131.98 | B     | O |   |
| ATOM | 2710 | N   | THR | B | 280 | 118.859 | 69.496 | -96.321  | 1.00       | 57.64 | B | N |
| ATOM | 2711 | CA  | THR | B | 280 | 119.293 | 69.466 | -97.714  | 1.00       | 57.64 | B | C |
| ATOM | 2712 | CB  | THR | B | 280 | 120.490 | 70.405 | -97.955  | 1.00       | 57.64 | B | C |
| ATOM | 2713 | OG1 | THR | B | 280 | 121.579 | 70.026 | -97.105  | 1.00       | 57.64 | B | O |
| ATOM | 2714 | CG2 | THR | B | 280 | 120.104 | 71.847 | -97.665  | 1.00       | 57.64 | B | C |
| ATOM | 2715 | C   | THR | B | 280 | 119.669 | 68.055 | -98.154  | 1.00       | 57.64 | B | C |
| ATOM | 2716 | O   | THR | B | 280 | 119.678 | 67.749 | -99.346  | 1.00       | 57.64 | B | O |
| ATOM | 2717 | N   | ASP | B | 281 | 119.978 | 67.199 | -97.186  | 1.00       | 89.40 | B | N |
| ATOM | 2718 | CA  | ASP | B | 281 | 120.345 | 65.818 | -97.474  | 1.00       | 89.40 | B | C |
| ATOM | 2719 | CB  | ASP | B | 281 | 121.138 | 65.222 | -96.308  | 1.00       | 89.40 | B | C |
| ATOM | 2720 | CG  | ASP | B | 281 | 121.782 | 63.893 | -96.655  | 1.00       | 89.40 | B | C |
| ATOM | 2721 | OD1 | ASP | B | 281 | 121.222 | 63.153 | -97.491  | 1.00       | 89.40 | B | O |
| ATOM | 2722 | OD2 | ASP | B | 281 | 122.853 | 63.587 | -96.090  | 1.00       | 89.40 | B | O |
| ATOM | 2723 | C   | ASP | B | 281 | 119.101 | 64.980 | -97.747  | 1.00       | 89.40 | B | C |
| ATOM | 2724 | O   | ASP | B | 281 | 119.046 | 64.232 | -98.723  | 1.00       | 89.40 | B | O |
| ATOM | 2725 | N   | ASN | B | 282 | 118.104 | 65.113 | -96.879  | 1.00       | 77.30 | B | N |
| ATOM | 2726 | CA  | ASN | B | 282 | 116.862 | 64.362 | -97.016  | 1.00       | 77.30 | B | C |
| ATOM | 2727 | CB  | ASN | B | 282 | 115.966 | 64.584 | -95.796  | 1.00       | 77.30 | B | C |
| ATOM | 2728 | CG  | ASN | B | 282 | 116.615 | 64.126 | -94.505  | 1.00       | 77.30 | B | C |
| ATOM | 2729 | OD1 | ASN | B | 282 | 117.420 | 63.195 | -94.497  | 1.00       | 77.30 | B | O |
| ATOM | 2730 | ND2 | ASN | B | 282 | 116.267 | 64.781 | -93.403  | 1.00       | 77.30 | B | N |
| ATOM | 2731 | C   | ASN | B | 282 | 116.104 | 64.714 | -98.293  | 1.00       | 77.30 | B | C |
| ATOM | 2732 | O   | ASN | B | 282 | 115.878 | 63.857 | -99.148  | 1.00       | 77.30 | B | O |
| ATOM | 2733 | N   | GLU | B | 283 | 115.715 | 65.979 | -98.416  | 1.00247.84 | B     | N |   |
| ATOM | 2734 | CA  | GLU | B | 283 | 114.971 | 66.440 | -99.583  | 1.00247.84 | B     | C |   |
| ATOM | 2735 | CB  | GLU | B | 283 | 113.480 | 66.556 | -99.255  | 1.00247.84 | B     | C |   |
| ATOM | 2736 | CG  | GLU | B | 283 | 112.607 | 66.994 | -100.423 | 1.00247.84 | B     | C |   |
| ATOM | 2737 | CD  | GLU | B | 283 | 112.511 | 65.948 | -101.519 | 1.00247.84 | B     | C |   |
| ATOM | 2738 | OE1 | GLU | B | 283 | 113.553 | 65.376 | -101.901 | 1.00247.84 | B     | O |   |
| ATOM | 2739 | OE2 | GLU | B | 283 | 111.386 | 65.696 | -102.000 | 1.00247.84 | B     | O |   |
| ATOM | 2740 | C   | GLU | B | 283 | 115.506 | 67.775 | -100.092 | 1.00247.84 | B     | C |   |
| ATOM | 2741 | O   | GLU | B | 283 | 115.931 | 68.625 | -99.310  | 1.00247.84 | B     | O |   |
| ATOM | 2742 | N   | ASP | B | 284 | 115.480 | 67.952 | -101.410 | 1.00243.54 | B     | N |   |
| ATOM | 2743 | CA  | ASP | B | 284 | 115.987 | 69.170 | -102.032 | 1.00243.54 | B     | C |   |
| ATOM | 2744 | CB  | ASP | B | 284 | 116.778 | 68.836 | -103.302 | 1.00243.54 | B     | C |   |
| ATOM | 2745 | CG  | ASP | B | 284 | 115.947 | 68.094 | -104.334 | 1.00243.54 | B     | C |   |
| ATOM | 2746 | OD1 | ASP | B | 284 | 115.031 | 67.341 | -103.941 | 1.00243.54 | B     | O |   |
| ATOM | 2747 | OD2 | ASP | B | 284 | 116.212 | 68.264 | -105.542 | 1.00243.54 | B     | O |   |
| ATOM | 2748 | C   | ASP | B | 284 | 114.870 | 70.163 | -102.346 | 1.00243.54 | B     | C |   |
| ATOM | 2749 | O   | ASP | B | 284 | 114.521 | 70.376 | -103.507 | 1.00243.54 | B     | O |   |
| ATOM | 2750 | N   | VAL | B | 285 | 114.315 | 70.771 | -101.303 | 1.00154.00 | B     | N |   |
| ATOM | 2751 | CA  | VAL | B | 285 | 113.265 | 71.770 | -101.467 | 1.00154.00 | B     | C |   |
| ATOM | 2752 | CB  | VAL | B | 285 | 112.025 | 71.439 | -100.616 | 1.00154.00 | B     | C |   |
| ATOM | 2753 | CG1 | VAL | B | 285 | 111.343 | 70.184 | -101.138 | 1.00154.00 | B     | C |   |
| ATOM | 2754 | CG2 | VAL | B | 285 | 112.413 | 71.279 | -99.153  | 1.00154.00 | B     | C |   |
| ATOM | 2755 | C   | VAL | B | 285 | 113.770 | 73.161 | -101.095 | 1.00154.00 | B     | C |   |
| ATOM | 2756 | O   | VAL | B | 285 | 114.961 | 73.354 | -100.852 | 1.00154.00 | B     | O |   |
| ATOM | 2757 | N   | SER | B | 286 | 112.857 | 74.125 | -101.053 | 1.00204.33 | B     | N |   |
| ATOM | 2758 | CA  | SER | B | 286 | 113.210 | 75.500 | -100.718 | 1.00204.33 | B     | C |   |
| ATOM | 2759 | CB  | SER | B | 286 | 113.512 | 76.300 | -101.987 | 1.00204.33 | B     | C |   |

|      |      |     |     |   |     |         |        |          |            |       |   |   |
|------|------|-----|-----|---|-----|---------|--------|----------|------------|-------|---|---|
| ATOM | 2760 | OG  | SER | B | 286 | 114.579 | 75.719 | -102.716 | 1.00204.33 | B     | O |   |
| ATOM | 2761 | C   | SER | B | 286 | 112.101 | 76.179 | -99.922  | 1.00204.33 | B     | C |   |
| ATOM | 2762 | O   | SER | B | 286 | 110.918 | 75.997 | -100.209 | 1.00204.33 | B     | O |   |
| ATOM | 2763 | N   | GLY | B | 287 | 112.491 | 76.961 | -98.921  | 1.00       | 74.32 | B | N |
| ATOM | 2764 | CA  | GLY | B | 287 | 111.534 | 77.677 | -98.097  | 1.00       | 74.32 | B | C |
| ATOM | 2765 | C   | GLY | B | 287 | 111.745 | 77.452 | -96.613  | 1.00       | 74.32 | B | C |
| ATOM | 2766 | O   | GLY | B | 287 | 111.617 | 78.378 | -95.812  | 1.00       | 74.32 | B | O |
| ATOM | 2767 | N   | ALA | B | 288 | 112.068 | 76.217 | -96.245  | 1.00       | 54.17 | B | N |
| ATOM | 2768 | CA  | ALA | B | 288 | 112.270 | 75.864 | -94.844  | 1.00       | 54.17 | B | C |
| ATOM | 2769 | CB  | ALA | B | 288 | 112.042 | 74.375 | -94.634  | 1.00       | 54.17 | B | C |
| ATOM | 2770 | C   | ALA | B | 288 | 113.659 | 76.267 | -94.355  | 1.00       | 54.17 | B | C |
| ATOM | 2771 | O   | ALA | B | 288 | 113.792 | 77.012 | -93.384  | 1.00       | 54.17 | B | O |
| ATOM | 2772 | N   | PHE | B | 289 | 114.689 | 75.772 | -95.034  | 1.00205.64 | B     | N |   |
| ATOM | 2773 | CA  | PHE | B | 289 | 116.069 | 76.064 | -94.656  | 1.00205.64 | B     | C |   |
| ATOM | 2774 | CB  | PHE | B | 289 | 117.040 | 75.096 | -95.342  | 1.00205.64 | B     | C |   |
| ATOM | 2775 | CG  | PHE | B | 289 | 117.114 | 75.258 | -96.838  | 1.00205.64 | B     | C |   |
| ATOM | 2776 | CD1 | PHE | B | 289 | 116.045 | 75.773 | -97.553  | 1.00205.64 | B     | C |   |
| ATOM | 2777 | CD2 | PHE | B | 289 | 118.257 | 74.889 | -97.527  | 1.00205.64 | B     | C |   |
| ATOM | 2778 | CE1 | PHE | B | 289 | 116.116 | 75.919 | -98.925  | 1.00205.64 | B     | C |   |
| ATOM | 2779 | CE2 | PHE | B | 289 | 118.334 | 75.033 | -98.899  | 1.00205.64 | B     | C |   |
| ATOM | 2780 | CZ  | PHE | B | 289 | 117.262 | 75.548 | -99.599  | 1.00205.64 | B     | C |   |
| ATOM | 2781 | C   | PHE | B | 289 | 116.455 | 77.509 | -94.962  | 1.00205.64 | B     | C |   |
| ATOM | 2782 | O   | PHE | B | 289 | 117.552 | 77.952 | -94.624  | 1.00205.64 | B     | O |   |
| ATOM | 2783 | N   | VAL | B | 290 | 115.547 | 78.236 | -95.604  | 1.00       | 43.82 | B | N |
| ATOM | 2784 | CA  | VAL | B | 290 | 115.782 | 79.637 | -95.932  | 1.00       | 43.82 | B | C |
| ATOM | 2785 | CB  | VAL | B | 290 | 114.779 | 80.145 | -96.986  | 1.00       | 43.82 | B | C |
| ATOM | 2786 | CG1 | VAL | B | 290 | 115.011 | 81.620 | -97.275  | 1.00       | 43.82 | B | C |
| ATOM | 2787 | CG2 | VAL | B | 290 | 114.891 | 79.323 | -98.262  | 1.00       | 43.82 | B | C |
| ATOM | 2788 | C   | VAL | B | 290 | 115.685 | 80.507 | -94.682  | 1.00       | 43.82 | B | C |
| ATOM | 2789 | O   | VAL | B | 290 | 116.431 | 81.474 | -94.526  | 1.00       | 43.82 | B | O |
| ATOM | 2790 | N   | THR | B | 291 | 114.763 | 80.152 | -93.793  | 1.00       | 50.43 | B | N |
| ATOM | 2791 | CA  | THR | B | 291 | 114.568 | 80.893 | -92.553  | 1.00       | 50.43 | B | C |
| ATOM | 2792 | CB  | THR | B | 291 | 113.283 | 80.449 | -91.826  | 1.00       | 50.43 | B | C |
| ATOM | 2793 | OG1 | THR | B | 291 | 112.157 | 80.609 | -92.698  | 1.00       | 50.43 | B | O |
| ATOM | 2794 | CG2 | THR | B | 291 | 113.067 | 81.278 | -90.569  | 1.00       | 50.43 | B | C |
| ATOM | 2795 | C   | THR | B | 291 | 115.760 | 80.722 | -91.616  | 1.00       | 50.43 | B | C |
| ATOM | 2796 | O   | THR | B | 291 | 116.170 | 81.665 | -90.940  | 1.00       | 50.43 | B | O |
| ATOM | 2797 | N   | LEU | B | 292 | 116.314 | 79.513 | -91.582  | 1.00       | 89.67 | B | N |
| ATOM | 2798 | CA  | LEU | B | 292 | 117.465 | 79.218 | -90.735  | 1.00       | 89.67 | B | C |
| ATOM | 2799 | CB  | LEU | B | 292 | 117.812 | 77.727 | -90.788  | 1.00       | 89.67 | B | C |
| ATOM | 2800 | CG  | LEU | B | 292 | 116.884 | 76.750 | -90.059  | 1.00       | 89.67 | B | C |
| ATOM | 2801 | CD1 | LEU | B | 292 | 116.797 | 77.098 | -88.580  | 1.00       | 89.67 | B | C |
| ATOM | 2802 | CD2 | LEU | B | 292 | 115.499 | 76.720 | -90.689  | 1.00       | 89.67 | B | C |
| ATOM | 2803 | C   | LEU | B | 292 | 118.678 | 80.051 | -91.138  | 1.00       | 89.67 | B | C |
| ATOM | 2804 | O   | LEU | B | 292 | 119.551 | 80.332 | -90.317  | 1.00       | 89.67 | B | O |
| ATOM | 2805 | N   | ARG | B | 293 | 118.725 | 80.440 | -92.408  | 1.00153.52 | B     | N |   |
| ATOM | 2806 | CA  | ARG | B | 293 | 119.815 | 81.262 | -92.918  | 1.00153.52 | B     | C |   |
| ATOM | 2807 | CB  | ARG | B | 293 | 119.666 | 81.462 | -94.429  | 1.00153.52 | B     | C |   |
| ATOM | 2808 | CG  | ARG | B | 293 | 120.939 | 81.891 | -95.149  | 1.00153.52 | B     | C |   |
| ATOM | 2809 | CD  | ARG | B | 293 | 121.312 | 83.331 | -94.838  | 1.00153.52 | B     | C |   |
| ATOM | 2810 | NE  | ARG | B | 293 | 122.513 | 83.752 | -95.553  | 1.00153.52 | B     | C |   |
| ATOM | 2811 | CZ  | ARG | B | 293 | 123.082 | 84.945 | -95.418  | 1.00153.52 | B     | N |   |
| ATOM | 2812 | NH1 | ARG | B | 293 | 122.561 | 85.840 | -94.591  | 1.00153.52 | B     | N |   |
| ATOM | 2813 | NH2 | ARG | B | 293 | 124.174 | 85.244 | -96.109  | 1.00153.52 | B     | N |   |
| ATOM | 2814 | C   | ARG | B | 293 | 119.827 | 82.607 | -92.199  | 1.00153.52 | B     | C |   |
| ATOM | 2815 | O   | ARG | B | 293 | 120.885 | 83.113 | -91.823  | 1.00153.52 | B     | O |   |
| ATOM | 2816 | N   | VAL | B | 294 | 118.642 | 83.177 | -92.006  | 1.00148.57 | B     | N |   |
| ATOM | 2817 | CA  | VAL | B | 294 | 118.506 | 84.453 | -91.314  | 1.00148.57 | B     | C |   |
| ATOM | 2818 | CB  | VAL | B | 294 | 117.054 | 84.965 | -91.361  | 1.00148.57 | B     | C |   |
| ATOM | 2819 | CG1 | VAL | B | 294 | 116.938 | 86.307 | -90.655  | 1.00148.57 | B     | C |   |
| ATOM | 2820 | CG2 | VAL | B | 294 | 116.577 | 85.073 | -92.801  | 1.00148.57 | B     | C |   |
| ATOM | 2821 | C   | VAL | B | 294 | 118.951 | 84.335 | -89.859  | 1.00148.57 | B     | C |   |
| ATOM | 2822 | O   | VAL | B | 294 | 119.481 | 85.285 | -89.281  | 1.00148.57 | B     | O |   |
| ATOM | 2823 | N   | PHE | B | 295 | 118.736 | 83.161 | -89.273  | 1.00171.25 | B     | N |   |
| ATOM | 2824 | CA  | PHE | B | 295 | 119.111 | 82.916 | -87.885  | 1.00171.25 | B     | C |   |
| ATOM | 2825 | CB  | PHE | B | 295 | 118.486 | 81.613 | -87.381  | 1.00171.25 | B     | C |   |
| ATOM | 2826 | CG  | PHE | B | 295 | 116.985 | 81.640 | -87.332  | 1.00171.25 | B     | C |   |
| ATOM | 2827 | CD1 | PHE | B | 295 | 116.301 | 82.844 | -87.300  | 1.00171.25 | B     | C |   |

|      |      |     |     |   |     |         |        |         |            |   |   |
|------|------|-----|-----|---|-----|---------|--------|---------|------------|---|---|
| ATOM | 2828 | CD2 | PHE | B | 295 | 116.258 | 80.462 | -87.315 | 1.00171.25 | B | C |
| ATOM | 2829 | CE1 | PHE | B | 295 | 114.920 | 82.871 | -87.253 | 1.00171.25 | B | C |
| ATOM | 2830 | CE2 | PHE | B | 295 | 114.877 | 80.483 | -87.269 | 1.00171.25 | B | C |
| ATOM | 2831 | CZ  | PHE | B | 295 | 114.208 | 81.689 | -87.238 | 1.00171.25 | B | C |
| ATOM | 2832 | C   | PHE | B | 295 | 120.626 | 82.872 | -87.711 | 1.00171.25 | B | C |
| ATOM | 2833 | O   | PHE | B | 295 | 121.132 | 82.924 | -86.590 | 1.00171.25 | B | O |
| ATOM | 2834 | N   | ARG | B | 296 | 121.344 | 82.777 | -88.824 | 1.00159.61 | B | N |
| ATOM | 2835 | CA  | ARG | B | 296 | 122.802 | 82.743 | -88.793 | 1.00159.61 | B | C |
| ATOM | 2836 | CB  | ARG | B | 296 | 123.355 | 82.223 | -90.121 | 1.00159.61 | B | C |
| ATOM | 2837 | CG  | ARG | B | 296 | 122.908 | 80.813 | -90.471 | 1.00159.61 | B | C |
| ATOM | 2838 | CD  | ARG | B | 296 | 123.466 | 80.366 | -91.814 | 1.00159.61 | B | C |
| ATOM | 2839 | NE  | ARG | B | 296 | 124.926 | 80.338 | -91.824 | 1.00159.61 | B | N |
| ATOM | 2840 | CZ  | ARG | B | 296 | 125.690 | 81.327 | -92.275 | 1.00159.61 | B | C |
| ATOM | 2841 | NH1 | ARG | B | 296 | 125.135 | 82.430 | -92.759 | 1.00159.61 | B | N |
| ATOM | 2842 | NH2 | ARG | B | 296 | 127.011 | 81.213 | -92.244 | 1.00159.61 | B | N |
| ATOM | 2843 | C   | ARG | B | 296 | 123.375 | 84.123 | -88.489 | 1.00159.61 | B | C |
| ATOM | 2844 | O   | ARG | B | 296 | 124.582 | 84.277 | -88.299 | 1.00159.61 | B | O |
| ATOM | 2845 | N   | VAL | B | 297 | 122.503 | 85.124 | -88.444 | 1.00167.62 | B | N |
| ATOM | 2846 | CA  | VAL | B | 297 | 122.915 | 86.490 | -88.145 | 1.00167.62 | B | C |
| ATOM | 2847 | CB  | VAL | B | 297 | 121.971 | 87.517 | -88.801 | 1.00167.62 | B | C |
| ATOM | 2848 | CG1 | VAL | B | 297 | 122.468 | 88.935 | -88.556 | 1.00167.62 | B | C |
| ATOM | 2849 | CG2 | VAL | B | 297 | 121.848 | 87.245 | -90.292 | 1.00167.62 | B | C |
| ATOM | 2850 | C   | VAL | B | 297 | 122.947 | 86.718 | -86.637 | 1.00167.62 | B | C |
| ATOM | 2851 | O   | VAL | B | 297 | 123.592 | 87.647 | -86.150 | 1.00167.62 | B | O |
| ATOM | 2852 | N   | PHE | B | 298 | 122.254 | 85.855 | -85.900 | 1.00121.45 | B | N |
| ATOM | 2853 | CA  | PHE | B | 298 | 122.179 | 85.971 | -84.448 | 1.00121.45 | B | C |
| ATOM | 2854 | CB  | PHE | B | 298 | 121.042 | 85.107 | -83.899 | 1.00121.45 | B | C |
| ATOM | 2855 | CG  | PHE | B | 298 | 119.677 | 85.541 | -84.351 | 1.00121.45 | B | C |
| ATOM | 2856 | CD1 | PHE | B | 298 | 119.464 | 86.827 | -84.821 | 1.00121.45 | B | C |
| ATOM | 2857 | CD2 | PHE | B | 298 | 118.606 | 84.665 | -84.306 | 1.00121.45 | B | C |
| ATOM | 2858 | CE1 | PHE | B | 298 | 118.210 | 87.230 | -85.238 | 1.00121.45 | B | C |
| ATOM | 2859 | CE2 | PHE | B | 298 | 117.349 | 85.062 | -84.721 | 1.00121.45 | B | C |
| ATOM | 2860 | CZ  | PHE | B | 298 | 117.151 | 86.346 | -85.187 | 1.00121.45 | B | C |
| ATOM | 2861 | C   | PHE | B | 298 | 123.496 | 85.600 | -83.772 | 1.00121.45 | B | C |
| ATOM | 2862 | O   | PHE | B | 298 | 123.592 | 85.600 | -82.545 | 1.00121.45 | B | O |
| ATOM | 2863 | N   | ARG | B | 299 | 124.506 | 85.285 | -84.575 | 1.00168.10 | B | N |
| ATOM | 2864 | CA  | ARG | B | 299 | 125.822 | 84.945 | -84.046 | 1.00168.10 | B | C |
| ATOM | 2865 | CB  | ARG | B | 299 | 126.672 | 84.258 | -85.116 | 1.00168.10 | B | C |
| ATOM | 2866 | CG  | ARG | B | 299 | 126.937 | 85.112 | -86.345 | 1.00168.10 | B | C |
| ATOM | 2867 | CD  | ARG | B | 299 | 127.761 | 84.357 | -87.374 | 1.00168.10 | B | C |
| ATOM | 2868 | NE  | ARG | B | 299 | 127.105 | 83.123 | -87.798 | 1.00168.10 | B | N |
| ATOM | 2869 | CZ  | ARG | B | 299 | 127.589 | 82.297 | -88.719 | 1.00168.10 | B | C |
| ATOM | 2870 | NH1 | ARG | B | 299 | 128.739 | 82.570 | -89.320 | 1.00168.10 | B | N |
| ATOM | 2871 | NH2 | ARG | B | 299 | 126.923 | 81.196 | -89.041 | 1.00168.10 | B | N |
| ATOM | 2872 | C   | ARG | B | 299 | 126.535 | 86.189 | -83.527 | 1.00168.10 | B | C |
| ATOM | 2873 | O   | ARG | B | 299 | 127.582 | 86.096 | -82.887 | 1.00168.10 | B | O |
| ATOM | 2874 | N   | ILE | B | 300 | 125.958 | 87.353 | -83.809 | 1.00203.46 | B | N |
| ATOM | 2875 | CA  | ILE | B | 300 | 126.518 | 88.620 | -83.356 | 1.00203.46 | B | C |
| ATOM | 2876 | CB  | ILE | B | 300 | 125.997 | 89.797 | -84.201 | 1.00203.46 | B | C |
| ATOM | 2877 | CG2 | ILE | B | 300 | 126.689 | 91.091 | -83.802 | 1.00203.46 | B | C |
| ATOM | 2878 | CG1 | ILE | B | 300 | 126.199 | 89.512 | -85.690 | 1.00203.46 | B | C |
| ATOM | 2879 | CD1 | ILE | B | 300 | 125.674 | 90.600 | -86.597 | 1.00203.46 | B | C |
| ATOM | 2880 | C   | ILE | B | 300 | 126.177 | 88.862 | -81.889 | 1.00203.46 | B | C |
| ATOM | 2881 | O   | ILE | B | 300 | 126.870 | 89.604 | -81.193 | 1.00203.46 | B | O |
| ATOM | 2882 | N   | PHE | B | 301 | 125.108 | 88.224 | -81.424 | 1.00106.14 | B | N |
| ATOM | 2883 | CA  | PHE | B | 301 | 124.686 | 88.348 | -80.034 | 1.00106.14 | B | C |
| ATOM | 2884 | CB  | PHE | B | 301 | 123.253 | 87.841 | -79.860 | 1.00106.14 | B | C |
| ATOM | 2885 | CG  | PHE | B | 301 | 122.226 | 88.663 | -80.585 | 1.00106.14 | B | C |
| ATOM | 2886 | CD1 | PHE | B | 301 | 122.483 | 89.982 | -80.914 | 1.00106.14 | B | C |
| ATOM | 2887 | CD2 | PHE | B | 301 | 121.003 | 88.115 | -80.936 | 1.00106.14 | B | C |
| ATOM | 2888 | CE1 | PHE | B | 301 | 121.540 | 90.741 | -81.580 | 1.00106.14 | B | C |
| ATOM | 2889 | CE2 | PHE | B | 301 | 120.056 | 88.869 | -81.603 | 1.00106.14 | B | C |
| ATOM | 2890 | CZ  | PHE | B | 301 | 120.325 | 90.184 | -81.925 | 1.00106.14 | B | C |
| ATOM | 2891 | C   | PHE | B | 301 | 125.624 | 87.591 | -79.100 | 1.00106.14 | B | C |
| ATOM | 2892 | O   | PHE | B | 301 | 125.383 | 87.507 | -77.897 | 1.00106.14 | B | O |
| ATOM | 2893 | N   | LYS | B | 302 | 126.695 | 87.039 | -79.662 | 1.00168.00 | B | N |
| ATOM | 2894 | CA  | LYS | B | 302 | 127.663 | 86.280 | -78.881 | 1.00168.00 | B | C |
| ATOM | 2895 | CB  | LYS | B | 302 | 128.412 | 85.288 | -79.775 | 1.00168.00 | B | C |

|      |      |     |     |   |     |         |        |         |            |   |   |
|------|------|-----|-----|---|-----|---------|--------|---------|------------|---|---|
| ATOM | 2896 | CG  | LYS | B | 302 | 129.251 | 84.273 | -79.016 | 1.00168.00 | B | C |
| ATOM | 2897 | CD  | LYS | B | 302 | 129.891 | 83.267 | -79.960 | 1.00168.00 | B | C |
| ATOM | 2898 | CE  | LYS | B | 302 | 128.842 | 82.506 | -80.754 | 1.00168.00 | B | C |
| ATOM | 2899 | NZ  | LYS | B | 302 | 127.929 | 81.731 | -79.870 | 1.00168.00 | B | N |
| ATOM | 2900 | C   | LYS | B | 302 | 128.645 | 87.212 | -78.177 | 1.00168.00 | B | C |
| ATOM | 2901 | O   | LYS | B | 302 | 129.359 | 86.802 | -77.262 | 1.00168.00 | B | O |
| ATOM | 2902 | N   | PHE | B | 303 | 128.673 | 88.470 | -78.607 | 1.00 83.96 | B | N |
| ATOM | 2903 | CA  | PHE | B | 303 | 129.533 | 89.471 | -77.986 | 1.00 83.96 | B | C |
| ATOM | 2904 | CB  | PHE | B | 303 | 129.642 | 90.718 | -78.867 | 1.00 83.96 | B | C |
| ATOM | 2905 | CG  | PHE | B | 303 | 130.425 | 90.504 | -80.131 | 1.00 83.96 | B | C |
| ATOM | 2906 | CD1 | PHE | B | 303 | 131.809 | 90.522 | -80.114 | 1.00 83.96 | B | C |
| ATOM | 2907 | CD2 | PHE | B | 303 | 129.778 | 90.296 | -81.337 | 1.00 83.96 | B | C |
| ATOM | 2908 | CE1 | PHE | B | 303 | 132.534 | 90.330 | -81.274 | 1.00 83.96 | B | C |
| ATOM | 2909 | CE2 | PHE | B | 303 | 130.496 | 90.104 | -82.501 | 1.00 83.96 | B | C |
| ATOM | 2910 | CZ  | PHE | B | 303 | 131.876 | 90.120 | -82.470 | 1.00 83.96 | B | C |
| ATOM | 2911 | C   | PHE | B | 303 | 129.017 | 89.857 | -76.604 | 1.00 83.96 | B | C |
| ATOM | 2912 | O   | PHE | B | 303 | 129.708 | 90.530 | -75.840 | 1.00 83.96 | B | O |
| ATOM | 2913 | N   | SER | B | 304 | 127.798 | 89.429 | -76.291 | 1.00 64.30 | B | N |
| ATOM | 2914 | CA  | SER | B | 304 | 127.186 | 89.729 | -75.001 | 1.00 64.30 | B | C |
| ATOM | 2915 | CB  | SER | B | 304 | 125.728 | 89.267 | -74.978 | 1.00 64.30 | B | C |
| ATOM | 2916 | OG  | SER | B | 304 | 125.635 | 87.866 | -75.167 | 1.00 64.30 | B | O |
| ATOM | 2917 | C   | SER | B | 304 | 127.961 | 89.080 | -73.860 | 1.00 64.30 | B | C |
| ATOM | 2918 | O   | SER | B | 304 | 127.936 | 89.559 | -72.727 | 1.00 64.30 | B | O |
| ATOM | 2919 | N   | ARG | B | 305 | 128.649 | 87.985 | -74.168 | 1.00148.97 | B | N |
| ATOM | 2920 | CA  | ARG | B | 305 | 129.443 | 87.275 | -73.174 | 1.00148.97 | B | C |
| ATOM | 2921 | CB  | ARG | B | 305 | 129.627 | 85.812 | -73.585 | 1.00148.97 | B | C |
| ATOM | 2922 | CG  | ARG | B | 305 | 130.253 | 84.935 | -72.514 | 1.00148.97 | B | C |
| ATOM | 2923 | CD  | ARG | B | 305 | 130.356 | 83.491 | -72.977 | 1.00148.97 | B | C |
| ATOM | 2924 | NE  | ARG | B | 305 | 130.892 | 82.620 | -71.936 | 1.00148.97 | B | N |
| ATOM | 2925 | CZ  | ARG | B | 305 | 130.148 | 81.985 | -71.037 | 1.00148.97 | B | C |
| ATOM | 2926 | NH1 | ARG | B | 305 | 128.829 | 82.123 | -71.049 | 1.00148.97 | B | N |
| ATOM | 2927 | NH2 | ARG | B | 305 | 130.721 | 81.211 | -70.126 | 1.00148.97 | B | N |
| ATOM | 2928 | C   | ARG | B | 305 | 130.799 | 87.949 | -72.990 | 1.00148.97 | B | C |
| ATOM | 2929 | O   | ARG | B | 305 | 131.529 | 87.655 | -72.044 | 1.00148.97 | B | O |
| ATOM | 2930 | N   | HIS | B | 306 | 131.126 | 88.859 | -73.902 | 1.00 99.22 | B | N |
| ATOM | 2931 | CA  | HIS | B | 306 | 132.392 | 89.580 | -73.846 | 1.00 99.22 | B | C |
| ATOM | 2932 | ND1 | HIS | B | 306 | 132.349 | 87.384 | -76.117 | 1.00 99.22 | B | N |
| ATOM | 2933 | CG  | HIS | B | 306 | 133.331 | 88.307 | -75.826 | 1.00 99.22 | B | C |
| ATOM | 2934 | CB  | HIS | B | 306 | 133.030 | 89.648 | -75.235 | 1.00 99.22 | B | C |
| ATOM | 2935 | NE2 | HIS | B | 306 | 134.211 | 86.483 | -76.675 | 1.00 99.22 | B | N |
| ATOM | 2936 | CD2 | HIS | B | 306 | 134.504 | 87.731 | -76.181 | 1.00 99.22 | B | C |
| ATOM | 2937 | CE1 | HIS | B | 306 | 132.904 | 86.299 | -76.625 | 1.00 99.22 | B | C |
| ATOM | 2938 | C   | HIS | B | 306 | 132.200 | 90.987 | -73.289 | 1.00 99.22 | B | C |
| ATOM | 2939 | O   | HIS | B | 306 | 132.806 | 91.355 | -72.283 | 1.00 99.22 | B | O |
| ATOM | 2940 | N   | SER | B | 307 | 131.354 | 91.770 | -73.952 | 1.00102.77 | B | N |
| ATOM | 2941 | CA  | SER | B | 307 | 131.080 | 93.136 | -73.524 | 1.00102.77 | B | C |
| ATOM | 2942 | CB  | SER | B | 307 | 130.745 | 94.017 | -74.729 | 1.00102.77 | B | C |
| ATOM | 2943 | OG  | SER | B | 307 | 131.819 | 94.048 | -75.652 | 1.00102.77 | B | O |
| ATOM | 2944 | C   | SER | B | 307 | 129.941 | 93.177 | -72.510 | 1.00102.77 | B | C |
| ATOM | 2945 | O   | SER | B | 307 | 129.093 | 92.286 | -72.478 | 1.00102.77 | B | O |
| ATOM | 2946 | N   | GLN | B | 308 | 129.929 | 94.218 | -71.684 | 1.00121.93 | B | N |
| ATOM | 2947 | CA  | GLN | B | 308 | 128.908 | 94.370 | -70.655 | 1.00121.93 | B | C |
| ATOM | 2948 | CB  | GLN | B | 308 | 129.523 | 94.941 | -69.376 | 1.00121.93 | B | C |
| ATOM | 2949 | CG  | GLN | B | 308 | 130.685 | 94.127 | -68.829 | 1.00121.93 | B | C |
| ATOM | 2950 | CD  | GLN | B | 308 | 130.275 | 92.727 | -68.416 | 1.00121.93 | B | C |
| ATOM | 2951 | OE1 | GLN | B | 308 | 129.305 | 92.544 | -67.681 | 1.00121.93 | B | O |
| ATOM | 2952 | NE2 | GLN | B | 308 | 131.009 | 91.729 | -68.893 | 1.00121.93 | B | N |
| ATOM | 2953 | C   | GLN | B | 308 | 127.772 | 95.269 | -71.134 | 1.00121.93 | B | C |
| ATOM | 2954 | O   | GLN | B | 308 | 126.811 | 95.513 | -70.405 | 1.00121.93 | B | O |
| ATOM | 2955 | N   | GLY | B | 309 | 127.892 | 95.759 | -72.363 | 1.00 30.52 | B | N |
| ATOM | 2956 | CA  | GLY | B | 309 | 126.882 | 96.627 | -72.941 | 1.00 30.52 | B | C |
| ATOM | 2957 | C   | GLY | B | 309 | 125.614 | 95.883 | -73.312 | 1.00 30.52 | B | C |
| ATOM | 2958 | O   | GLY | B | 309 | 124.508 | 96.364 | -73.068 | 1.00 30.52 | B | O |
| ATOM | 2959 | N   | LEU | B | 310 | 125.776 | 94.706 | -73.906 | 1.00101.35 | B | N |
| ATOM | 2960 | CA  | LEU | B | 310 | 124.638 | 93.889 | -74.311 | 1.00101.35 | B | C |
| ATOM | 2961 | CB  | LEU | B | 310 | 125.073 | 92.813 | -75.307 | 1.00101.35 | B | C |
| ATOM | 2962 | CG  | LEU | B | 310 | 125.663 | 93.312 | -76.627 | 1.00101.35 | B | C |
| ATOM | 2963 | CD1 | LEU | B | 310 | 126.104 | 92.143 | -77.492 | 1.00101.35 | B | C |

|      |      |     |     |   |     |         |        |         |            |   |   |
|------|------|-----|-----|---|-----|---------|--------|---------|------------|---|---|
| ATOM | 2964 | CD2 | LEU | B | 310 | 124.660 | 94.184 | -77.367 | 1.00101.35 | B | C |
| ATOM | 2965 | C   | LEU | B | 310 | 123.963 | 93.245 | -73.105 | 1.00101.35 | B | C |
| ATOM | 2966 | O   | LEU | B | 310 | 122.785 | 92.894 | -73.155 | 1.00101.35 | B | O |
| ATOM | 2967 | N   | ARG | B | 311 | 124.719 | 93.090 | -72.022 | 1.00108.34 | B | N |
| ATOM | 2968 | CA  | ARG | B | 311 | 124.181 | 92.518 | -70.795 | 1.00108.34 | B | C |
| ATOM | 2969 | CB  | ARG | B | 311 | 125.308 | 92.187 | -69.814 | 1.00108.34 | B | C |
| ATOM | 2970 | CG  | ARG | B | 311 | 126.252 | 91.097 | -70.294 | 1.00108.34 | B | C |
| ATOM | 2971 | CD  | ARG | B | 311 | 127.306 | 90.786 | -69.245 | 1.00108.34 | B | C |
| ATOM | 2972 | NE  | ARG | B | 311 | 126.707 | 90.404 | -67.969 | 1.00108.34 | B | N |
| ATOM | 2973 | CZ  | ARG | B | 311 | 126.441 | 89.152 | -67.614 | 1.00108.34 | B | C |
| ATOM | 2974 | NH1 | ARG | B | 311 | 126.723 | 88.152 | -68.438 | 1.00108.34 | B | N |
| ATOM | 2975 | NH2 | ARG | B | 311 | 125.895 | 88.897 | -66.433 | 1.00108.34 | B | N |
| ATOM | 2976 | C   | ARG | B | 311 | 123.180 | 93.466 | -70.144 | 1.00108.34 | B | C |
| ATOM | 2977 | O   | ARG | B | 311 | 122.097 | 93.052 | -69.732 | 1.00108.34 | B | O |
| ATOM | 2978 | N   | ILE | B | 312 | 123.550 | 94.740 | -70.056 | 1.00 41.79 | B | N |
| ATOM | 2979 | CA  | ILE | B | 312 | 122.679 | 95.750 | -69.467 | 1.00 41.79 | B | C |
| ATOM | 2980 | CB  | ILE | B | 312 | 123.425 | 97.078 | -69.241 | 1.00 41.79 | B | C |
| ATOM | 2981 | CG2 | ILE | B | 312 | 122.498 | 98.109 | -68.615 | 1.00 41.79 | B | C |
| ATOM | 2982 | CG1 | ILE | B | 312 | 124.656 | 96.857 | -68.361 | 1.00 41.79 | B | C |
| ATOM | 2983 | CD1 | ILE | B | 312 | 125.453 | 98.115 | -68.097 | 1.00 41.79 | B | C |
| ATOM | 2984 | C   | ILE | B | 312 | 121.463 | 96.001 | -70.350 | 1.00 41.79 | B | C |
| ATOM | 2985 | O   | ILE | B | 312 | 120.335 | 96.073 | -69.863 | 1.00 41.79 | B | O |
| ATOM | 2986 | N   | LEU | B | 313 | 121.701 | 96.134 | -71.651 | 1.00 49.07 | B | N |
| ATOM | 2987 | CA  | LEU | B | 313 | 120.626 | 96.360 | -72.610 | 1.00 49.07 | B | C |
| ATOM | 2988 | CB  | LEU | B | 313 | 121.200 | 96.611 | -74.006 | 1.00 49.07 | B | C |
| ATOM | 2989 | CG  | LEU | B | 313 | 120.186 | 96.874 | -75.122 | 1.00 49.07 | B | C |
| ATOM | 2990 | CD1 | LEU | B | 313 | 119.309 | 98.067 | -74.779 | 1.00 49.07 | B | C |
| ATOM | 2991 | CD2 | LEU | B | 313 | 120.893 | 97.089 | -76.451 | 1.00 49.07 | B | C |
| ATOM | 2992 | C   | LEU | B | 313 | 119.664 | 95.178 | -72.643 | 1.00 49.07 | B | C |
| ATOM | 2993 | O   | LEU | B | 313 | 118.460 | 95.350 | -72.829 | 1.00 49.07 | B | O |
| ATOM | 2994 | N   | GLY | B | 314 | 120.204 | 93.977 | -72.461 | 1.00 27.86 | B | N |
| ATOM | 2995 | CA  | GLY | B | 314 | 119.398 | 92.770 | -72.460 | 1.00 27.86 | B | C |
| ATOM | 2996 | C   | GLY | B | 314 | 118.471 | 92.698 | -71.263 | 1.00 27.86 | B | C |
| ATOM | 2997 | O   | GLY | B | 314 | 117.304 | 92.326 | -71.392 | 1.00 27.86 | B | O |
| ATOM | 2998 | N   | TYR | B | 315 | 118.992 | 93.056 | -70.095 | 1.00 99.30 | B | N |
| ATOM | 2999 | CA  | TYR | B | 315 | 118.205 | 93.042 | -68.867 | 1.00 99.30 | B | C |
| ATOM | 3000 | CB  | TYR | B | 315 | 119.117 | 93.142 | -67.643 | 1.00 99.30 | B | C |
| ATOM | 3001 | CG  | TYR | B | 315 | 120.081 | 91.987 | -67.504 | 1.00 99.30 | B | C |
| ATOM | 3002 | CD1 | TYR | B | 315 | 121.248 | 92.115 | -66.762 | 1.00 99.30 | B | C |
| ATOM | 3003 | CD2 | TYR | B | 315 | 119.824 | 90.766 | -68.114 | 1.00 99.30 | B | C |
| ATOM | 3004 | CE1 | TYR | B | 315 | 122.132 | 91.061 | -66.633 | 1.00 99.30 | B | C |
| ATOM | 3005 | CE2 | TYR | B | 315 | 120.702 | 89.707 | -67.991 | 1.00 99.30 | B | C |
| ATOM | 3006 | CZ  | TYR | B | 315 | 121.854 | 89.860 | -67.249 | 1.00 99.30 | B | C |
| ATOM | 3007 | OH  | TYR | B | 315 | 122.731 | 88.807 | -67.124 | 1.00 99.30 | B | O |
| ATOM | 3008 | C   | TYR | B | 315 | 117.185 | 94.175 | -68.856 | 1.00 99.30 | B | C |
| ATOM | 3009 | O   | TYR | B | 315 | 116.131 | 94.068 | -68.229 | 1.00 99.30 | B | O |
| ATOM | 3010 | N   | THR | B | 316 | 117.505 | 95.260 | -69.554 | 1.00115.27 | B | N |
| ATOM | 3011 | CA  | THR | B | 316 | 116.609 | 96.407 | -69.638 | 1.00115.27 | B | C |
| ATOM | 3012 | CB  | THR | B | 316 | 117.315 | 97.635 | -70.242 | 1.00115.27 | B | C |
| ATOM | 3013 | OG1 | THR | B | 316 | 118.419 | 98.013 | -69.410 | 1.00115.27 | B | O |
| ATOM | 3014 | CG2 | THR | B | 316 | 116.349 | 98.804 | -70.353 | 1.00115.27 | B | C |
| ATOM | 3015 | C   | THR | B | 316 | 115.377 | 96.075 | -70.472 | 1.00115.27 | B | C |
| ATOM | 3016 | O   | THR | B | 316 | 114.249 | 96.349 | -70.065 | 1.00115.27 | B | O |
| ATOM | 3017 | N   | LEU | B | 317 | 115.601 | 95.483 | -71.641 | 1.00 53.09 | B | N |
| ATOM | 3018 | CA  | LEU | B | 317 | 114.508 | 95.100 | -72.527 | 1.00 53.09 | B | C |
| ATOM | 3019 | CB  | LEU | B | 317 | 115.045 | 94.706 | -73.905 | 1.00 53.09 | B | C |
| ATOM | 3020 | CG  | LEU | B | 317 | 115.798 | 95.790 | -74.679 | 1.00 53.09 | B | C |
| ATOM | 3021 | CD1 | LEU | B | 317 | 116.330 | 95.243 | -75.994 | 1.00 53.09 | B | C |
| ATOM | 3022 | CD2 | LEU | B | 317 | 114.904 | 96.997 | -74.920 | 1.00 53.09 | B | C |
| ATOM | 3023 | C   | LEU | B | 317 | 113.695 | 93.956 | -71.931 | 1.00 53.09 | B | C |
| ATOM | 3024 | O   | LEU | B | 317 | 112.511 | 93.801 | -72.229 | 1.00 53.09 | B | O |
| ATOM | 3025 | N   | LYS | B | 318 | 114.339 | 93.156 | -71.087 | 1.00 75.11 | B | N |
| ATOM | 3026 | CA  | LYS | B | 318 | 113.670 | 92.041 | -70.428 | 1.00 75.11 | B | C |
| ATOM | 3027 | CB  | LYS | B | 318 | 114.695 | 91.076 | -69.830 | 1.00 75.11 | B | C |
| ATOM | 3028 | CG  | LYS | B | 318 | 114.079 | 89.882 | -69.121 | 1.00 75.11 | B | C |
| ATOM | 3029 | CD  | LYS | B | 318 | 115.149 | 88.974 | -68.537 | 1.00 75.11 | B | C |
| ATOM | 3030 | CE  | LYS | B | 318 | 116.070 | 88.441 | -69.621 | 1.00 75.11 | B | C |
| ATOM | 3031 | NZ  | LYS | B | 318 | 117.128 | 87.556 | -69.060 | 1.00 75.11 | B | N |



|      |      |     |     |   |     |         |         |         |      |        |   |   |
|------|------|-----|-----|---|-----|---------|---------|---------|------|--------|---|---|
| ATOM | 3032 | C   | LYS | B | 318 | 112.726 | 92.541  | -69.340 | 1.00 | 75.11  | B | C |
| ATOM | 3033 | O   | LYS | B | 318 | 111.568 | 92.128  | -69.271 | 1.00 | 75.11  | B | O |
| ATOM | 3034 | N   | SER | B | 319 | 113.228 | 93.432  | -68.491 | 1.00 | 82.79  | B | N |
| ATOM | 3035 | CA  | SER | B | 319 | 112.423 | 94.008  | -67.420 | 1.00 | 82.79  | B | C |
| ATOM | 3036 | CB  | SER | B | 319 | 113.309 | 94.781  | -66.441 | 1.00 | 82.79  | B | C |
| ATOM | 3037 | OG  | SER | B | 319 | 112.535 | 95.368  | -65.409 | 1.00 | 82.79  | B | O |
| ATOM | 3038 | C   | SER | B | 319 | 111.343 | 94.925  | -67.983 | 1.00 | 82.79  | B | C |
| ATOM | 3039 | O   | SER | B | 319 | 110.302 | 95.130  | -67.359 | 1.00 | 82.79  | B | O |
| ATOM | 3040 | N   | CYS | B | 320 | 111.599 | 95.473  | -69.166 | 1.00 | 91.34  | B | N |
| ATOM | 3041 | CA  | CYS | B | 320 | 110.647 | 96.361  | -69.823 | 1.00 | 91.34  | B | C |
| ATOM | 3042 | CB  | CYS | B | 320 | 111.357 | 97.602  | -70.367 | 1.00 | 91.34  | B | C |
| ATOM | 3043 | SG  | CYS | B | 320 | 112.186 | 98.601  | -69.109 | 1.00 | 91.34  | B | S |
| ATOM | 3044 | C   | CYS | B | 320 | 109.916 | 95.641  | -70.950 | 1.00 | 91.34  | B | C |
| ATOM | 3045 | O   | CYS | B | 320 | 109.536 | 96.254  | -71.948 | 1.00 | 91.34  | B | O |
| ATOM | 3046 | N   | ALA | B | 321 | 109.724 | 94.336  | -70.785 | 1.00 | 55.04  | B | N |
| ATOM | 3047 | CA  | ALA | B | 321 | 109.020 | 93.533  | -71.777 | 1.00 | 55.04  | B | C |
| ATOM | 3048 | CB  | ALA | B | 321 | 109.038 | 92.065  | -71.381 | 1.00 | 55.04  | B | C |
| ATOM | 3049 | C   | ALA | B | 321 | 107.587 | 94.022  | -71.950 | 1.00 | 55.04  | B | C |
| ATOM | 3050 | O   | ALA | B | 321 | 107.023 | 93.950  | -73.042 | 1.00 | 55.04  | B | O |
| ATOM | 3051 | N   | SER | B | 322 | 107.005 | 94.522  | -70.865 | 1.00 | 39.37  | B | N |
| ATOM | 3052 | CA  | SER | B | 322 | 105.651 | 95.058  | -70.899 | 1.00 | 39.37  | B | C |
| ATOM | 3053 | CB  | SER | B | 322 | 104.998 | 94.952  | -69.519 | 1.00 | 39.37  | B | C |
| ATOM | 3054 | OG  | SER | B | 322 | 104.927 | 93.604  | -69.090 | 1.00 | 39.37  | B | O |
| ATOM | 3055 | C   | SER | B | 322 | 105.656 | 96.508  | -71.368 | 1.00 | 39.37  | B | C |
| ATOM | 3056 | O   | SER | B | 322 | 104.779 | 96.930  | -72.121 | 1.00 | 39.37  | B | O |
| ATOM | 3057 | N   | GLU | B | 323 | 106.650 | 97.267  | -70.917 | 1.00 | 101.99 | B | N |
| ATOM | 3058 | CA  | GLU | B | 323 | 106.783 | 98.667  | -71.302 | 1.00 | 101.99 | B | C |
| ATOM | 3059 | CB  | GLU | B | 323 | 107.988 | 99.303  | -70.607 | 1.00 | 101.99 | B | C |
| ATOM | 3060 | CG  | GLU | B | 323 | 107.933 | 99.251  | -69.088 | 1.00 | 101.99 | B | C |
| ATOM | 3061 | CD  | GLU | B | 323 | 106.804 | 100.085 | -68.513 | 1.00 | 101.99 | B | C |
| ATOM | 3062 | OE1 | GLU | B | 323 | 106.181 | 100.856 | -69.273 | 1.00 | 101.99 | B | O |
| ATOM | 3063 | OE2 | GLU | B | 323 | 106.541 | 99.970  | -67.298 | 1.00 | 101.99 | B | O |
| ATOM | 3064 | C   | GLU | B | 323 | 106.921 | 98.804  | -72.814 | 1.00 | 101.99 | B | C |
| ATOM | 3065 | O   | GLU | B | 323 | 106.298 | 99.669  | -73.429 | 1.00 | 101.99 | B | O |
| ATOM | 3066 | N   | LEU | B | 324 | 107.743 | 97.942  | -73.406 | 1.00 | 51.45  | B | N |
| ATOM | 3067 | CA  | LEU | B | 324 | 107.944 | 97.943  | -74.849 | 1.00 | 51.45  | B | C |
| ATOM | 3068 | CB  | LEU | B | 324 | 109.115 | 97.033  | -75.225 | 1.00 | 51.45  | B | C |
| ATOM | 3069 | CG  | LEU | B | 324 | 109.485 | 96.969  | -76.709 | 1.00 | 51.45  | B | C |
| ATOM | 3070 | CD1 | LEU | B | 324 | 109.840 | 98.351  | -77.234 | 1.00 | 51.45  | B | C |
| ATOM | 3071 | CD2 | LEU | B | 324 | 110.630 | 95.995  | -76.936 | 1.00 | 51.45  | B | C |
| ATOM | 3072 | C   | LEU | B | 324 | 106.678 | 97.493  | -75.567 | 1.00 | 51.45  | B | C |
| ATOM | 3073 | O   | LEU | B | 324 | 106.436 | 97.866  | -76.715 | 1.00 | 51.45  | B | O |
| ATOM | 3074 | N   | GLY | B | 325 | 105.871 | 96.689  | -74.882 | 1.00 | 21.45  | B | N |
| ATOM | 3075 | CA  | GLY | B | 325 | 104.627 | 96.195  | -75.442 | 1.00 | 21.45  | B | C |
| ATOM | 3076 | C   | GLY | B | 325 | 103.642 | 97.309  | -75.737 | 1.00 | 21.45  | B | C |
| ATOM | 3077 | O   | GLY | B | 325 | 103.034 | 97.344  | -76.807 | 1.00 | 21.45  | B | O |
| ATOM | 3078 | N   | PHE | B | 326 | 103.484 | 98.222  | -74.784 | 1.00 | 93.89  | B | N |
| ATOM | 3079 | CA  | PHE | B | 326 | 102.575 | 99.351  | -74.948 | 1.00 | 93.89  | B | C |
| ATOM | 3080 | CB  | PHE | B | 326 | 102.321 | 100.041 | -73.605 | 1.00 | 93.89  | B | C |
| ATOM | 3081 | CG  | PHE | B | 326 | 101.535 | 99.207  | -72.632 | 1.00 | 93.89  | B | C |
| ATOM | 3082 | CD1 | PHE | B | 326 | 102.181 | 98.395  | -71.715 | 1.00 | 93.89  | B | C |
| ATOM | 3083 | CD2 | PHE | B | 326 | 100.151 | 99.238  | -72.635 | 1.00 | 93.89  | B | C |
| ATOM | 3084 | CE1 | PHE | B | 326 | 101.460 | 97.628  | -70.819 | 1.00 | 93.89  | B | C |
| ATOM | 3085 | CE2 | PHE | B | 326 | 99.425  | 98.473  | -71.741 | 1.00 | 93.89  | B | C |
| ATOM | 3086 | CZ  | PHE | B | 326 | 100.080 | 97.667  | -70.833 | 1.00 | 93.89  | B | C |
| ATOM | 3087 | C   | PHE | B | 326 | 103.114 | 100.355 | -75.962 | 1.00 | 93.89  | B | C |
| ATOM | 3088 | O   | PHE | B | 326 | 102.357 | 101.142 | -76.530 | 1.00 | 93.89  | B | O |
| ATOM | 3089 | N   | LEU | B | 327 | 104.424 | 100.325 | -76.182 | 1.00 | 47.15  | B | N |
| ATOM | 3090 | CA  | LEU | B | 327 | 105.057 | 101.218 | -77.146 | 1.00 | 47.15  | B | C |
| ATOM | 3091 | CB  | LEU | B | 327 | 106.581 | 101.140 | -77.034 | 1.00 | 47.15  | B | C |
| ATOM | 3092 | CG  | LEU | B | 327 | 107.380 | 101.961 | -78.048 | 1.00 | 47.15  | B | C |
| ATOM | 3093 | CD1 | LEU | B | 327 | 106.957 | 103.422 | -78.023 | 1.00 | 47.15  | B | C |
| ATOM | 3094 | CD2 | LEU | B | 327 | 108.872 | 101.827 | -77.789 | 1.00 | 47.15  | B | C |
| ATOM | 3095 | C   | LEU | B | 327 | 104.617 | 100.885 | -78.567 | 1.00 | 47.15  | B | C |
| ATOM | 3096 | O   | LEU | B | 327 | 104.280 | 101.775 | -79.347 | 1.00 | 47.15  | B | O |
| ATOM | 3097 | N   | LEU | B | 328 | 104.623 | 99.598  | -78.897 | 1.00 | 87.13  | B | N |
| ATOM | 3098 | CA  | LEU | B | 328 | 104.187 | 99.144  | -80.211 | 1.00 | 87.13  | B | C |
| ATOM | 3099 | CB  | LEU | B | 328 | 104.788 | 97.775  | -80.542 | 1.00 | 87.13  | B | C |

|      |      |     |     |   |     |         |         |         |      |        |   |   |
|------|------|-----|-----|---|-----|---------|---------|---------|------|--------|---|---|
| ATOM | 3100 | CG  | LEU | B | 328 | 106.269 | 97.715  | -80.931 | 1.00 | 87.13  | B | C |
| ATOM | 3101 | CD1 | LEU | B | 328 | 107.164 | 98.232  | -79.815 | 1.00 | 87.13  | B | C |
| ATOM | 3102 | CD2 | LEU | B | 328 | 106.658 | 96.295  | -81.313 | 1.00 | 87.13  | B | C |
| ATOM | 3103 | C   | LEU | B | 328 | 102.666 | 99.081  | -80.279 | 1.00 | 87.13  | B | C |
| ATOM | 3104 | O   | LEU | B | 328 | 102.077 | 99.175  | -81.357 | 1.00 | 87.13  | B | O |
| ATOM | 3105 | N   | PHE | B | 329 | 102.034 | 98.924  | -79.121 | 1.00 | 48.49  | B | N |
| ATOM | 3106 | CA  | PHE | B | 329 | 100.580 | 98.870  | -79.045 | 1.00 | 48.49  | B | C |
| ATOM | 3107 | CB  | PHE | B | 329 | 100.129 | 98.413  | -77.657 | 1.00 | 48.49  | B | C |
| ATOM | 3108 | CG  | PHE | B | 329 | 98.637  | 98.351  | -77.495 | 1.00 | 48.49  | B | C |
| ATOM | 3109 | CD1 | PHE | B | 329 | 97.934  | 97.212  | -77.853 | 1.00 | 48.49  | B | C |
| ATOM | 3110 | CD2 | PHE | B | 329 | 97.939  | 99.431  | -76.985 | 1.00 | 48.49  | B | C |
| ATOM | 3111 | CE1 | PHE | B | 329 | 96.560  | 97.152  | -77.706 | 1.00 | 48.49  | B | C |
| ATOM | 3112 | CE2 | PHE | B | 329 | 96.567  | 99.378  | -76.836 | 1.00 | 48.49  | B | C |
| ATOM | 3113 | CZ  | PHE | B | 329 | 95.876  | 98.237  | -77.196 | 1.00 | 48.49  | B | C |
| ATOM | 3114 | C   | PHE | B | 329 | 99.970  | 100.227 | -79.376 | 1.00 | 48.49  | B | C |
| ATOM | 3115 | O   | PHE | B | 329 | 99.219  | 100.361 | -80.342 | 1.00 | 48.49  | B | O |
| ATOM | 3116 | N   | SER | B | 330 | 100.298 | 101.231 | -78.568 | 1.00 | 71.43  | B | N |
| ATOM | 3117 | CA  | SER | B | 330 | 99.804  | 102.586 | -78.785 | 1.00 | 71.43  | B | C |
| ATOM | 3118 | CB  | SER | B | 330 | 100.324 | 103.526 | -77.697 | 1.00 | 71.43  | B | C |
| ATOM | 3119 | OG  | SER | B | 330 | 101.741 | 103.542 | -77.672 | 1.00 | 71.43  | B | O |
| ATOM | 3120 | C   | SER | B | 330 | 100.210 | 103.101 | -80.162 | 1.00 | 71.43  | B | C |
| ATOM | 3121 | O   | SER | B | 330 | 99.553  | 103.977 | -80.726 | 1.00 | 71.43  | B | O |
| ATOM | 3122 | N   | LEU | B | 331 | 101.296 | 102.553 | -80.697 | 1.00 | 53.19  | B | N |
| ATOM | 3123 | CA  | LEU | B | 331 | 101.765 | 102.920 | -82.027 | 1.00 | 53.19  | B | C |
| ATOM | 3124 | CB  | LEU | B | 331 | 103.178 | 102.384 | -82.265 | 1.00 | 53.19  | B | C |
| ATOM | 3125 | CG  | LEU | B | 331 | 103.772 | 102.623 | -83.655 | 1.00 | 53.19  | B | C |
| ATOM | 3126 | CD1 | LEU | B | 331 | 103.886 | 104.111 | -83.946 | 1.00 | 53.19  | B | C |
| ATOM | 3127 | CD2 | LEU | B | 331 | 105.126 | 101.944 | -83.785 | 1.00 | 53.19  | B | C |
| ATOM | 3128 | C   | LEU | B | 331 | 100.820 | 102.385 | -83.097 | 1.00 | 53.19  | B | C |
| ATOM | 3129 | O   | LEU | B | 331 | 100.253 | 103.151 | -83.875 | 1.00 | 53.19  | B | O |
| ATOM | 3130 | N   | THR | B | 332 | 100.654 | 101.066 | -83.124 | 1.00 | 103.02 | B | N |
| ATOM | 3131 | CA  | THR | B | 332 | 99.790  | 100.414 | -84.102 | 1.00 | 103.02 | B | C |
| ATOM | 3132 | CB  | THR | B | 332 | 99.685  | 98.900  | -83.839 | 1.00 | 103.02 | B | C |
| ATOM | 3133 | OG1 | THR | B | 332 | 100.993 | 98.315  | -83.868 | 1.00 | 103.02 | B | O |
| ATOM | 3134 | CG2 | THR | B | 332 | 98.812  | 98.233  | -84.891 | 1.00 | 103.02 | B | C |
| ATOM | 3135 | C   | THR | B | 332 | 98.391  | 101.022 | -84.108 | 1.00 | 103.02 | B | C |
| ATOM | 3136 | O   | THR | B | 332 | 97.783  | 101.193 | -85.164 | 1.00 | 103.02 | B | O |
| ATOM | 3137 | N   | MET | B | 333 | 97.887  | 101.348 | -82.922 | 1.00 | 112.73 | B | N |
| ATOM | 3138 | CA  | MET | B | 333 | 96.572  | 101.966 | -82.794 | 1.00 | 112.73 | B | C |
| ATOM | 3139 | CB  | MET | B | 333 | 96.252  | 102.249 | -81.325 | 1.00 | 112.73 | B | C |
| ATOM | 3140 | CG  | MET | B | 333 | 96.154  | 101.004 | -80.459 | 1.00 | 112.73 | B | C |
| ATOM | 3141 | SD  | MET | B | 333 | 94.877  | 99.865  | -81.027 | 1.00 | 112.73 | B | S |
| ATOM | 3142 | CE  | MET | B | 333 | 93.424  | 100.908 | -80.923 | 1.00 | 112.73 | B | C |
| ATOM | 3143 | C   | MET | B | 333 | 96.497  | 103.255 | -83.603 | 1.00 | 112.73 | B | C |
| ATOM | 3144 | O   | MET | B | 333 | 95.600  | 103.430 | -84.428 | 1.00 | 112.73 | B | O |
| ATOM | 3145 | N   | ALA | B | 334 | 97.447  | 104.153 | -83.365 | 1.00 | 30.08  | B | N |
| ATOM | 3146 | CA  | ALA | B | 334 | 97.489  | 105.430 | -84.067 | 1.00 | 30.08  | B | C |
| ATOM | 3147 | CB  | ALA | B | 334 | 98.562  | 106.327 | -83.469 | 1.00 | 30.08  | B | C |
| ATOM | 3148 | C   | ALA | B | 334 | 97.724  | 105.239 | -85.562 | 1.00 | 30.08  | B | C |
| ATOM | 3149 | O   | ALA | B | 334 | 97.247  | 106.027 | -86.379 | 1.00 | 30.08  | B | O |
| ATOM | 3150 | N   | ILE | B | 335 | 98.459  | 104.189 | -85.914 | 1.00 | 41.45  | B | N |
| ATOM | 3151 | CA  | ILE | B | 335 | 98.763  | 103.900 | -87.312 | 1.00 | 41.45  | B | C |
| ATOM | 3152 | CB  | ILE | B | 335 | 99.590  | 102.608 | -87.460 | 1.00 | 41.45  | B | C |
| ATOM | 3153 | CG2 | ILE | B | 335 | 99.747  | 102.241 | -88.927 | 1.00 | 41.45  | B | C |
| ATOM | 3154 | CG1 | ILE | B | 335 | 100.962 | 102.775 | -86.804 | 1.00 | 41.45  | B | C |
| ATOM | 3155 | CD1 | ILE | B | 335 | 101.840 | 101.546 | -86.902 | 1.00 | 41.45  | B | C |
| ATOM | 3156 | C   | ILE | B | 335 | 97.496  | 103.781 | -88.152 | 1.00 | 41.45  | B | C |
| ATOM | 3157 | O   | ILE | B | 335 | 97.318  | 104.509 | -89.128 | 1.00 | 41.45  | B | O |
| ATOM | 3158 | N   | ILE | B | 336 | 96.618  | 102.861 | -87.767 | 1.00 | 44.55  | B | N |
| ATOM | 3159 | CA  | ILE | B | 336 | 95.381  | 102.626 | -88.501 | 1.00 | 44.55  | B | C |
| ATOM | 3160 | CB  | ILE | B | 336 | 94.598  | 101.434 | -87.916 | 1.00 | 44.55  | B | C |
| ATOM | 3161 | CG2 | ILE | B | 336 | 93.389  | 101.112 | -88.782 | 1.00 | 44.55  | B | C |
| ATOM | 3162 | CG1 | ILE | B | 336 | 95.512  | 100.213 | -87.781 | 1.00 | 44.55  | B | C |
| ATOM | 3163 | CD1 | ILE | B | 336 | 94.830  | 98.999  | -87.190 | 1.00 | 44.55  | B | C |
| ATOM | 3164 | C   | ILE | B | 336 | 94.487  | 103.864 | -88.506 | 1.00 | 44.55  | B | C |
| ATOM | 3165 | O   | ILE | B | 336 | 93.759  | 104.111 | -89.467 | 1.00 | 44.55  | B | O |
| ATOM | 3166 | N   | ILE | B | 337 | 94.551  | 104.641 | -87.430 | 1.00 | 87.94  | B | N |
| ATOM | 3167 | CA  | ILE | B | 337 | 93.733  | 105.842 | -87.300 | 1.00 | 87.94  | B | C |

|      |      |     |     |   |     |        |         |          |      |        |   |   |
|------|------|-----|-----|---|-----|--------|---------|----------|------|--------|---|---|
| ATOM | 3168 | CB  | ILE | B | 337 | 93.892 | 106.487 | -85.910  | 1.00 | 87.94  | B | C |
| ATOM | 3169 | CG2 | ILE | B | 337 | 93.105 | 107.786 | -85.832  | 1.00 | 87.94  | B | C |
| ATOM | 3170 | CG1 | ILE | B | 337 | 93.437 | 105.519 | -84.818  | 1.00 | 87.94  | B | C |
| ATOM | 3171 | CD1 | ILE | B | 337 | 93.624 | 106.051 | -83.415  | 1.00 | 87.94  | B | C |
| ATOM | 3172 | C   | ILE | B | 337 | 94.065 | 106.881 | -88.368  | 1.00 | 87.94  | B | C |
| ATOM | 3173 | O   | ILE | B | 337 | 93.181 | 107.354 | -89.082  | 1.00 | 87.94  | B | O |
| ATOM | 3174 | N   | PHE | B | 338 | 95.343 | 107.232 | -88.472  | 1.00 | 61.40  | B | N |
| ATOM | 3175 | CA  | PHE | B | 338 | 95.780 | 108.252 | -89.419  | 1.00 | 61.40  | B | C |
| ATOM | 3176 | CB  | PHE | B | 338 | 97.116 | 108.857 | -88.982  | 1.00 | 61.40  | B | C |
| ATOM | 3177 | CG  | PHE | B | 338 | 97.048 | 109.603 | -87.680  | 1.00 | 61.40  | B | C |
| ATOM | 3178 | CD1 | PHE | B | 338 | 96.618 | 110.919 | -87.642  | 1.00 | 61.40  | B | C |
| ATOM | 3179 | CD2 | PHE | B | 338 | 97.417 | 108.989 | -86.495  | 1.00 | 61.40  | B | C |
| ATOM | 3180 | CE1 | PHE | B | 338 | 96.555 | 111.608 | -86.445  | 1.00 | 61.40  | B | C |
| ATOM | 3181 | CE2 | PHE | B | 338 | 97.356 | 109.673 | -85.295  | 1.00 | 61.40  | B | C |
| ATOM | 3182 | CZ  | PHE | B | 338 | 96.925 | 110.984 | -85.270  | 1.00 | 61.40  | B | C |
| ATOM | 3183 | C   | PHE | B | 338 | 95.886 | 107.713 | -90.843  | 1.00 | 61.40  | B | C |
| ATOM | 3184 | O   | PHE | B | 338 | 95.598 | 108.425 | -91.805  | 1.00 | 61.40  | B | O |
| ATOM | 3185 | N   | ALA | B | 339 | 96.299 | 106.457 | -90.973  | 1.00 | 38.36  | B | N |
| ATOM | 3186 | CA  | ALA | B | 339 | 96.463 | 105.838 | -92.285  | 1.00 | 38.36  | B | C |
| ATOM | 3187 | CB  | ALA | B | 339 | 96.956 | 104.406 | -92.141  | 1.00 | 38.36  | B | C |
| ATOM | 3188 | C   | ALA | B | 339 | 95.169 | 105.878 | -93.091  | 1.00 | 38.36  | B | C |
| ATOM | 3189 | O   | ALA | B | 339 | 95.194 | 105.873 | -94.322  | 1.00 | 38.36  | B | O |
| ATOM | 3190 | N   | THR | B | 340 | 94.040 | 105.920 | -92.391  | 1.00 | 117.99 | B | N |
| ATOM | 3191 | CA  | THR | B | 340 | 92.737 | 105.955 | -93.046  | 1.00 | 117.99 | B | C |
| ATOM | 3192 | CB  | THR | B | 340 | 91.650 | 105.278 | -92.187  | 1.00 | 117.99 | B | C |
| ATOM | 3193 | OG1 | THR | B | 340 | 91.600 | 105.899 | -90.896  | 1.00 | 117.99 | B | O |
| ATOM | 3194 | CG2 | THR | B | 340 | 91.951 | 103.796 | -92.019  | 1.00 | 117.99 | B | C |
| ATOM | 3195 | C   | THR | B | 340 | 92.305 | 107.380 | -93.380  | 1.00 | 117.99 | B | C |
| ATOM | 3196 | O   | THR | B | 340 | 92.024 | 107.696 | -94.536  | 1.00 | 117.99 | B | O |
| ATOM | 3197 | N   | VAL | B | 341 | 92.258 | 108.239 | -92.366  | 1.00 | 49.53  | B | N |
| ATOM | 3198 | CA  | VAL | B | 341 | 91.817 | 109.619 | -92.551  | 1.00 | 49.53  | B | C |
| ATOM | 3199 | CB  | VAL | B | 341 | 91.860 | 110.412 | -91.229  | 1.00 | 49.53  | B | C |
| ATOM | 3200 | CG1 | VAL | B | 341 | 90.907 | 109.803 | -90.213  | 1.00 | 49.53  | B | C |
| ATOM | 3201 | CG2 | VAL | B | 341 | 93.277 | 110.456 | -90.679  | 1.00 | 49.53  | B | C |
| ATOM | 3202 | C   | VAL | B | 341 | 92.645 | 110.350 | -93.605  | 1.00 | 49.53  | B | C |
| ATOM | 3203 | O   | VAL | B | 341 | 92.150 | 111.254 | -94.278  | 1.00 | 49.53  | B | O |
| ATOM | 3204 | N   | MET | B | 342 | 93.906 | 109.953 | -93.746  | 1.00 | 112.56 | B | N |
| ATOM | 3205 | CA  | MET | B | 342 | 94.793 | 110.562 | -94.730  | 1.00 | 112.56 | B | C |
| ATOM | 3206 | CB  | MET | B | 342 | 96.255 | 110.427 | -94.296  | 1.00 | 112.56 | B | C |
| ATOM | 3207 | CG  | MET | B | 342 | 96.587 | 111.140 | -92.996  | 1.00 | 112.56 | B | C |
| ATOM | 3208 | SD  | MET | B | 342 | 98.338 | 111.045 | -92.576  | 1.00 | 112.56 | B | S |
| ATOM | 3209 | CE  | MET | B | 342 | 98.571 | 109.272 | -92.481  | 1.00 | 112.56 | B | C |
| ATOM | 3210 | C   | MET | B | 342 | 94.597 | 109.938 | -96.107  | 1.00 | 112.56 | B | C |
| ATOM | 3211 | O   | MET | B | 342 | 94.896 | 110.557 | -97.128  | 1.00 | 112.56 | B | O |
| ATOM | 3212 | N   | PHE | B | 343 | 94.094 | 108.708 | -96.128  | 1.00 | 78.09  | B | N |
| ATOM | 3213 | CA  | PHE | B | 343 | 93.860 | 107.999 | -97.380  | 1.00 | 78.09  | B | C |
| ATOM | 3214 | CB  | PHE | B | 343 | 93.792 | 106.490 | -97.142  | 1.00 | 78.09  | B | C |
| ATOM | 3215 | CG  | PHE | B | 343 | 93.516 | 105.694 | -98.386  | 1.00 | 78.09  | B | C |
| ATOM | 3216 | CD1 | PHE | B | 343 | 94.540 | 105.377 | -99.262  | 1.00 | 78.09  | B | C |
| ATOM | 3217 | CD2 | PHE | B | 343 | 92.233 | 105.263 | -98.678  | 1.00 | 78.09  | B | C |
| ATOM | 3218 | CE1 | PHE | B | 343 | 94.290 | 104.647 | -100.408 | 1.00 | 78.09  | B | C |
| ATOM | 3219 | CE2 | PHE | B | 343 | 91.977 | 104.532 | -99.823  | 1.00 | 78.09  | B | C |
| ATOM | 3220 | CZ  | PHE | B | 343 | 93.007 | 104.223 | -100.688 | 1.00 | 78.09  | B | C |
| ATOM | 3221 | C   | PHE | B | 343 | 92.586 | 108.479 | -98.066  | 1.00 | 78.09  | B | C |
| ATOM | 3222 | O   | PHE | B | 343 | 92.592 | 108.791 | -99.256  | 1.00 | 78.09  | B | O |
| ATOM | 3223 | N   | TYR | B | 344 | 91.494 | 108.534 | -97.310  | 1.00 | 66.10  | B | N |
| ATOM | 3224 | CA  | TYR | B | 344 | 90.212 | 108.974 | -97.851  | 1.00 | 66.10  | B | C |
| ATOM | 3225 | CB  | TYR | B | 344 | 89.081 | 108.693 | -96.858  | 1.00 | 66.10  | B | C |
| ATOM | 3226 | CG  | TYR | B | 344 | 88.908 | 107.229 | -96.520  | 1.00 | 66.10  | B | C |
| ATOM | 3227 | CD1 | TYR | B | 344 | 88.203 | 106.380 | -97.363  | 1.00 | 66.10  | B | C |
| ATOM | 3228 | CD2 | TYR | B | 344 | 89.444 | 106.697 | -95.355  | 1.00 | 66.10  | B | C |
| ATOM | 3229 | CE1 | TYR | B | 344 | 88.042 | 105.041 | -97.057  | 1.00 | 66.10  | B | C |
| ATOM | 3230 | CE2 | TYR | B | 344 | 89.287 | 105.361 | -95.041  | 1.00 | 66.10  | B | C |
| ATOM | 3231 | CZ  | TYR | B | 344 | 88.586 | 104.538 | -95.895  | 1.00 | 66.10  | B | C |
| ATOM | 3232 | OH  | TYR | B | 344 | 88.428 | 103.207 | -95.583  | 1.00 | 66.10  | B | O |
| ATOM | 3233 | C   | TYR | B | 344 | 90.242 | 110.456 | -98.210  | 1.00 | 66.10  | B | C |
| ATOM | 3234 | O   | TYR | B | 344 | 89.343 | 110.959 | -98.885  | 1.00 | 66.10  | B | O |
| ATOM | 3235 | N   | ALA | B | 345 | 91.281 | 111.150 | -97.755  | 1.00 | 55.12  | B | N |

|      |      |     |     |   |     |         |         |          |      |        |   |   |
|------|------|-----|-----|---|-----|---------|---------|----------|------|--------|---|---|
| ATOM | 3236 | CA  | ALA | B | 345 | 91.443  | 112.569 | -98.045  | 1.00 | 55.12  | B | C |
| ATOM | 3237 | CB  | ALA | B | 345 | 92.132  | 113.271 | -96.885  | 1.00 | 55.12  | B | C |
| ATOM | 3238 | C   | ALA | B | 345 | 92.227  | 112.776 | -99.336  | 1.00 | 55.12  | B | C |
| ATOM | 3239 | O   | ALA | B | 345 | 92.159  | 113.840 | -99.952  | 1.00 | 55.12  | B | O |
| ATOM | 3240 | N   | GLU | B | 346 | 92.969  | 111.750 | -99.741  | 1.00 | 125.73 | B | N |
| ATOM | 3241 | CA  | GLU | B | 346 | 93.766  | 111.814 | -100.960 | 1.00 | 125.73 | B | C |
| ATOM | 3242 | CB  | GLU | B | 346 | 95.212  | 111.399 | -100.675 | 1.00 | 125.73 | B | C |
| ATOM | 3243 | CG  | GLU | B | 346 | 95.917  | 112.261 | -99.640  | 1.00 | 125.73 | B | C |
| ATOM | 3244 | CD  | GLU | B | 346 | 96.151  | 113.681 | -100.119 | 1.00 | 125.73 | B | C |
| ATOM | 3245 | OE1 | GLU | B | 346 | 95.972  | 113.942 | -101.327 | 1.00 | 125.73 | B | O |
| ATOM | 3246 | OE2 | GLU | B | 346 | 96.514  | 114.537 | -99.286  | 1.00 | 125.73 | B | O |
| ATOM | 3247 | C   | GLU | B | 346 | 93.175  | 110.929 | -102.053 | 1.00 | 125.73 | B | C |
| ATOM | 3248 | O   | GLU | B | 346 | 93.641  | 110.940 | -103.192 | 1.00 | 125.73 | B | O |
| ATOM | 3249 | N   | LYS | B | 347 | 92.147  | 110.166 | -101.698 | 1.00 | 138.31 | B | N |
| ATOM | 3250 | CA  | LYS | B | 347 | 91.501  | 109.261 | -102.642 | 1.00 | 138.31 | B | C |
| ATOM | 3251 | CB  | LYS | B | 347 | 90.500  | 108.357 | -101.918 | 1.00 | 138.31 | B | C |
| ATOM | 3252 | CG  | LYS | B | 347 | 89.817  | 107.338 | -102.817 | 1.00 | 138.31 | B | C |
| ATOM | 3253 | CD  | LYS | B | 347 | 88.838  | 106.478 | -102.034 | 1.00 | 138.31 | B | C |
| ATOM | 3254 | CE  | LYS | B | 347 | 88.157  | 105.459 | -102.933 | 1.00 | 138.31 | B | C |
| ATOM | 3255 | NZ  | LYS | B | 347 | 87.393  | 106.111 | -104.032 | 1.00 | 138.31 | B | N |
| ATOM | 3256 | C   | LYS | B | 347 | 90.802  | 110.030 | -103.759 | 1.00 | 138.31 | B | C |
| ATOM | 3257 | O   | LYS | B | 347 | 90.634  | 109.519 | -104.867 | 1.00 | 138.31 | B | O |
| ATOM | 3258 | N   | GLY | B | 348 | 90.399  | 111.261 | -103.461 | 1.00 | 56.79  | B | N |
| ATOM | 3259 | CA  | GLY | B | 348 | 89.720  | 112.097 | -104.434 | 1.00 | 56.79  | B | C |
| ATOM | 3260 | C   | GLY | B | 348 | 90.683  | 112.812 | -105.362 | 1.00 | 56.79  | B | C |
| ATOM | 3261 | O   | GLY | B | 348 | 90.320  | 113.790 | -106.015 | 1.00 | 56.79  | B | O |
| ATOM | 3262 | N   | SER | B | 349 | 91.917  | 112.321 | -105.419 | 1.00 | 123.99 | B | N |
| ATOM | 3263 | CA  | SER | B | 349 | 92.940  | 112.915 | -106.271 | 1.00 | 123.99 | B | C |
| ATOM | 3264 | CB  | SER | B | 349 | 94.037  | 113.558 | -105.421 | 1.00 | 123.99 | B | C |
| ATOM | 3265 | OG  | SER | B | 349 | 93.506  | 114.567 | -104.580 | 1.00 | 123.99 | B | O |
| ATOM | 3266 | C   | SER | B | 349 | 93.544  | 111.877 | -107.210 | 1.00 | 123.99 | B | C |
| ATOM | 3267 | O   | SER | B | 349 | 93.721  | 110.717 | -106.838 | 1.00 | 123.99 | B | O |
| ATOM | 3268 | N   | SER | B | 350 | 93.858  | 112.302 | -108.430 | 1.00 | 183.36 | B | N |
| ATOM | 3269 | CA  | SER | B | 350 | 94.437  | 111.410 | -109.427 | 1.00 | 183.36 | B | C |
| ATOM | 3270 | CB  | SER | B | 350 | 94.322  | 112.021 | -110.825 | 1.00 | 183.36 | B | C |
| ATOM | 3271 | OG  | SER | B | 350 | 94.893  | 111.170 | -111.803 | 1.00 | 183.36 | B | O |
| ATOM | 3272 | C   | SER | B | 350 | 95.896  | 111.098 | -109.110 | 1.00 | 183.36 | B | C |
| ATOM | 3273 | O   | SER | B | 350 | 96.344  | 109.962 | -109.264 | 1.00 | 183.36 | B | O |
| ATOM | 3274 | N   | ALA | B | 351 | 96.632  | 112.112 | -108.667 | 1.00 | 238.58 | B | N |
| ATOM | 3275 | CA  | ALA | B | 351 | 98.041  | 111.946 | -108.331 | 1.00 | 238.58 | B | C |
| ATOM | 3276 | CB  | ALA | B | 351 | 98.823  | 113.202 | -108.687 | 1.00 | 238.58 | B | C |
| ATOM | 3277 | C   | ALA | B | 351 | 98.218  | 111.607 | -106.855 | 1.00 | 238.58 | B | C |
| ATOM | 3278 | O   | ALA | B | 351 | 99.048  | 112.201 | -106.167 | 1.00 | 238.58 | B | O |
| ATOM | 3279 | N   | SER | B | 352 | 97.433  | 110.649 | -106.374 | 1.00 | 139.03 | B | N |
| ATOM | 3280 | CA  | SER | B | 352 | 97.498  | 110.232 | -104.979 | 1.00 | 139.03 | B | C |
| ATOM | 3281 | CB  | SER | B | 352 | 96.187  | 109.565 | -104.557 | 1.00 | 139.03 | B | C |
| ATOM | 3282 | OG  | SER | B | 352 | 95.921  | 108.418 | -105.346 | 1.00 | 139.03 | B | O |
| ATOM | 3283 | C   | SER | B | 352 | 98.667  | 109.282 | -104.739 | 1.00 | 139.03 | B | C |
| ATOM | 3284 | O   | SER | B | 352 | 98.877  | 108.338 | -105.501 | 1.00 | 139.03 | B | O |
| ATOM | 3285 | N   | LYS | B | 353 | 99.423  | 109.537 | -103.677 | 1.00 | 160.96 | B | N |
| ATOM | 3286 | CA  | LYS | B | 353 | 100.570 | 108.704 | -103.336 | 1.00 | 160.96 | B | C |
| ATOM | 3287 | CB  | LYS | B | 353 | 101.643 | 109.534 | -102.629 | 1.00 | 160.96 | B | C |
| ATOM | 3288 | CG  | LYS | B | 353 | 102.168 | 110.700 | -103.450 | 1.00 | 160.96 | B | C |
| ATOM | 3289 | CD  | LYS | B | 353 | 102.784 | 110.224 | -104.756 | 1.00 | 160.96 | B | C |
| ATOM | 3290 | CE  | LYS | B | 353 | 103.299 | 111.392 | -105.583 | 1.00 | 160.96 | B | C |
| ATOM | 3291 | NZ  | LYS | B | 353 | 103.901 | 110.942 | -106.868 | 1.00 | 160.96 | B | N |
| ATOM | 3292 | C   | LYS | B | 353 | 100.156 | 107.526 | -102.461 | 1.00 | 160.96 | B | C |
| ATOM | 3293 | O   | LYS | B | 353 | 100.985 | 106.697 | -102.085 | 1.00 | 160.96 | B | O |
| ATOM | 3294 | N   | PHE | B | 354 | 98.868  | 107.458 | -102.141 | 1.00 | 217.25 | B | N |
| ATOM | 3295 | CA  | PHE | B | 354 | 98.340  | 106.381 | -101.313 | 1.00 | 217.25 | B | C |
| ATOM | 3296 | CB  | PHE | B | 354 | 97.549  | 106.951 | -100.135 | 1.00 | 217.25 | B | C |
| ATOM | 3297 | CG  | PHE | B | 354 | 98.358  | 107.845 | -99.238  | 1.00 | 217.25 | B | C |
| ATOM | 3298 | CD1 | PHE | B | 354 | 99.060  | 107.319 | -98.166  | 1.00 | 217.25 | B | C |
| ATOM | 3299 | CD2 | PHE | B | 354 | 98.415  | 109.210 | -99.465  | 1.00 | 217.25 | B | C |
| ATOM | 3300 | CE1 | PHE | B | 354 | 99.805  | 108.138 | -97.339  | 1.00 | 217.25 | B | C |
| ATOM | 3301 | CE2 | PHE | B | 354 | 99.158  | 110.034 | -98.641  | 1.00 | 217.25 | B | C |
| ATOM | 3302 | CZ  | PHE | B | 354 | 99.854  | 109.497 | -97.576  | 1.00 | 217.25 | B | C |
| ATOM | 3303 | C   | PHE | B | 354 | 97.459  | 105.441 | -102.130 | 1.00 | 217.25 | B | C |

|      |      |     |     |   |     |         |                 |      |        |   |   |
|------|------|-----|-----|---|-----|---------|-----------------|------|--------|---|---|
| ATOM | 3304 | O   | PHE | B | 354 | 96.358  | 105.808-102.542 | 1.00 | 217.25 | B | O |
| ATOM | 3305 | N   | THR | B | 355 | 97.950  | 104.228-102.361 | 1.00 | 186.86 | B | N |
| ATOM | 3306 | CA  | THR | B | 355 | 97.211  | 103.238-103.135 | 1.00 | 186.86 | B | C |
| ATOM | 3307 | CB  | THR | B | 355 | 98.149  | 102.176-103.737 | 1.00 | 186.86 | B | C |
| ATOM | 3308 | OG1 | THR | B | 355 | 98.845  | 101.497-102.684 | 1.00 | 186.86 | B | O |
| ATOM | 3309 | CG2 | THR | B | 355 | 99.160  | 102.825-104.671 | 1.00 | 186.86 | B | C |
| ATOM | 3310 | C   | THR | B | 355 | 96.154  | 102.546-102.282 | 1.00 | 186.86 | B | C |
| ATOM | 3311 | O   | THR | B | 355 | 95.014  | 102.370-102.710 | 1.00 | 186.86 | B | O |
| ATOM | 3312 | N   | SER | B | 356 | 96.541  | 102.154-101.072 | 1.00 | 47.70  | B | N |
| ATOM | 3313 | CA  | SER | B | 356 | 95.628  | 101.481-100.157 | 1.00 | 47.70  | B | C |
| ATOM | 3314 | CB  | SER | B | 356 | 95.659  | 99.969-100.386  | 1.00 | 47.70  | B | C |
| ATOM | 3315 | OG  | SER | B | 356 | 96.960  | 99.447-100.175  | 1.00 | 47.70  | B | O |
| ATOM | 3316 | C   | SER | B | 356 | 95.970  | 101.799-98.705  | 1.00 | 47.70  | B | C |
| ATOM | 3317 | O   | SER | B | 356 | 97.056  | 102.295-98.408  | 1.00 | 47.70  | B | O |
| ATOM | 3318 | N   | ILE | B | 357 | 95.034  | 101.511-97.806  | 1.00 | 65.52  | B | N |
| ATOM | 3319 | CA  | ILE | B | 357 | 95.239  | 101.751-96.381  | 1.00 | 65.52  | B | C |
| ATOM | 3320 | CB  | ILE | B | 357 | 93.970  | 101.438-95.558  | 1.00 | 65.52  | B | C |
| ATOM | 3321 | CG2 | ILE | B | 357 | 94.226  | 101.662-94.076  | 1.00 | 65.52  | B | C |
| ATOM | 3322 | CG1 | ILE | B | 357 | 92.798  | 102.296-96.039  | 1.00 | 65.52  | B | C |
| ATOM | 3323 | CD1 | ILE | B | 357 | 91.516  | 102.068-95.269  | 1.00 | 65.52  | B | C |
| ATOM | 3324 | C   | ILE | B | 357 | 96.427  | 100.964-95.824  | 1.00 | 65.52  | B | C |
| ATOM | 3325 | O   | ILE | B | 357 | 97.259  | 101.524-95.109  | 1.00 | 65.52  | B | O |
| ATOM | 3326 | N   | PRO | B | 358 | 96.511  | 99.661-96.145   | 1.00 | 79.94  | B | N |
| ATOM | 3327 | CA  | PRO | B | 358 | 97.655  | 98.866-95.685   | 1.00 | 79.94  | B | C |
| ATOM | 3328 | CD  | PRO | B | 358 | 95.530  | 98.839-96.875   | 1.00 | 79.94  | B | C |
| ATOM | 3329 | CB  | PRO | B | 358 | 97.415  | 97.502-96.338   | 1.00 | 79.94  | B | C |
| ATOM | 3330 | CG  | PRO | B | 358 | 95.944  | 97.439-96.540   | 1.00 | 79.94  | B | C |
| ATOM | 3331 | C   | PRO | B | 358 | 98.980  | 99.448-96.166   | 1.00 | 79.94  | B | C |
| ATOM | 3332 | O   | PRO | B | 358 | 99.987  | 99.350-95.465   | 1.00 | 79.94  | B | O |
| ATOM | 3333 | N   | ALA | B | 359 | 98.972  | 100.048-97.351  | 1.00 | 43.14  | B | N |
| ATOM | 3334 | CA  | ALA | B | 359 | 100.175 | 100.648-97.915  | 1.00 | 43.14  | B | C |
| ATOM | 3335 | CB  | ALA | B | 359 | 100.066 | 100.730-99.430  | 1.00 | 43.14  | B | C |
| ATOM | 3336 | C   | ALA | B | 359 | 100.429 | 102.031-97.323  | 1.00 | 43.14  | B | C |
| ATOM | 3337 | O   | ALA | B | 359 | 101.513 | 102.594-97.480  | 1.00 | 43.14  | B | O |
| ATOM | 3338 | N   | ALA | B | 360 | 99.424  | 102.570-96.643  | 1.00 | 50.03  | B | N |
| ATOM | 3339 | CA  | ALA | B | 360 | 99.534  | 103.885-96.022  | 1.00 | 50.03  | B | C |
| ATOM | 3340 | CB  | ALA | B | 360 | 98.171  | 104.559-95.964  | 1.00 | 50.03  | B | C |
| ATOM | 3341 | C   | ALA | B | 360 | 100.142 | 103.787-94.627  | 1.00 | 50.03  | B | C |
| ATOM | 3342 | O   | ALA | B | 360 | 100.378 | 104.801-93.970  | 1.00 | 50.03  | B | O |
| ATOM | 3343 | N   | PHE | B | 361 | 100.394 | 102.560-94.180  | 1.00 | 66.36  | B | N |
| ATOM | 3344 | CA  | PHE | B | 361 | 100.984 | 102.328-92.866  | 1.00 | 66.36  | B | C |
| ATOM | 3345 | CB  | PHE | B | 361 | 100.940 | 100.841-92.509  | 1.00 | 66.36  | B | C |
| ATOM | 3346 | CG  | PHE | B | 361 | 99.550  | 100.298-92.336  | 1.00 | 66.36  | B | C |
| ATOM | 3347 | CD1 | PHE | B | 361 | 98.479  | 101.152-92.135  | 1.00 | 66.36  | B | C |
| ATOM | 3348 | CD2 | PHE | B | 361 | 99.315  | 98.934-92.371   | 1.00 | 66.36  | B | C |
| ATOM | 3349 | CE1 | PHE | B | 361 | 97.200  | 100.657-91.975  | 1.00 | 66.36  | B | C |
| ATOM | 3350 | CE2 | PHE | B | 361 | 98.038  | 98.431-92.211   | 1.00 | 66.36  | B | C |
| ATOM | 3351 | CZ  | PHE | B | 361 | 96.979  | 99.294-92.013   | 1.00 | 66.36  | B | C |
| ATOM | 3352 | C   | PHE | B | 361 | 102.420 | 102.836-92.813  | 1.00 | 66.36  | B | C |
| ATOM | 3353 | O   | PHE | B | 361 | 102.885 | 103.303-91.773  | 1.00 | 66.36  | B | O |
| ATOM | 3354 | N   | TRP | B | 362 | 103.116 | 102.740-93.940  | 1.00 | 75.06  | B | N |
| ATOM | 3355 | CA  | TRP | B | 362 | 104.497 | 103.199-94.032  | 1.00 | 75.06  | B | C |
| ATOM | 3356 | CB  | TRP | B | 362 | 105.065 | 102.914-95.423  | 1.00 | 75.06  | B | C |
| ATOM | 3357 | CG  | TRP | B | 362 | 106.403 | 103.544-95.666  | 1.00 | 75.06  | B | C |
| ATOM | 3358 | CD2 | TRP | B | 362 | 107.680 | 103.030-95.267  | 1.00 | 75.06  | B | C |
| ATOM | 3359 | CD1 | TRP | B | 362 | 106.649 | 104.722-96.308  | 1.00 | 75.06  | B | C |
| ATOM | 3360 | NE1 | TRP | B | 362 | 108.000 | 104.973-96.337  | 1.00 | 75.06  | B | N |
| ATOM | 3361 | CE2 | TRP | B | 362 | 108.655 | 103.949-95.704  | 1.00 | 75.06  | B | C |
| ATOM | 3362 | CE3 | TRP | B | 362 | 108.093 | 101.882-94.585  | 1.00 | 75.06  | B | C |
| ATOM | 3363 | CZ2 | TRP | B | 362 | 110.016 | 103.756-95.480  | 1.00 | 75.06  | B | C |
| ATOM | 3364 | CZ3 | TRP | B | 362 | 109.445 | 101.692-94.364  | 1.00 | 75.06  | B | C |
| ATOM | 3365 | CH2 | TRP | B | 362 | 110.390 | 102.624-94.810  | 1.00 | 75.06  | B | C |
| ATOM | 3366 | C   | TRP | B | 362 | 104.609 | 104.686-93.716  | 1.00 | 75.06  | B | C |
| ATOM | 3367 | O   | TRP | B | 362 | 105.362 | 105.085-92.828  | 1.00 | 75.06  | B | O |
| ATOM | 3368 | N   | TYR | B | 363 | 103.854 | 105.500-94.447  | 1.00 | 49.06  | B | N |
| ATOM | 3369 | CA  | TYR | B | 363 | 103.874 | 106.946-94.255  | 1.00 | 49.06  | B | C |
| ATOM | 3370 | CB  | TYR | B | 363 | 102.873 | 107.625-95.191  | 1.00 | 49.06  | B | C |
| ATOM | 3371 | CG  | TYR | B | 363 | 102.732 | 109.112-94.956  | 1.00 | 49.06  | B | C |

|      |      |     |     |   |     |         |         |         |      |        |   |   |
|------|------|-----|-----|---|-----|---------|---------|---------|------|--------|---|---|
| ATOM | 3372 | CD1 | TYR | B | 363 | 103.635 | 110.010 | -95.509 | 1.00 | 49.06  | B | C |
| ATOM | 3373 | CD2 | TYR | B | 363 | 101.697 | 109.617 | -94.181 | 1.00 | 49.06  | B | C |
| ATOM | 3374 | CE1 | TYR | B | 363 | 103.511 | 111.370 | -95.296 | 1.00 | 49.06  | B | C |
| ATOM | 3375 | CE2 | TYR | B | 363 | 101.565 | 110.976 | -93.962 | 1.00 | 49.06  | B | C |
| ATOM | 3376 | CZ  | TYR | B | 363 | 102.474 | 111.847 | -94.522 | 1.00 | 49.06  | B | C |
| ATOM | 3377 | OH  | TYR | B | 363 | 102.345 | 113.200 | -94.306 | 1.00 | 49.06  | B | O |
| ATOM | 3378 | C   | TYR | B | 363 | 103.578 | 107.330 | -92.809 | 1.00 | 49.06  | B | C |
| ATOM | 3379 | O   | TYR | B | 363 | 104.164 | 108.272 | -92.277 | 1.00 | 49.06  | B | O |
| ATOM | 3380 | N   | THR | B | 364 | 102.666 | 106.596 | -92.180 | 1.00 | 38.67  | B | N |
| ATOM | 3381 | CA  | THR | B | 364 | 102.281 | 106.875 | -90.802 | 1.00 | 38.67  | B | C |
| ATOM | 3382 | CB  | THR | B | 364 | 101.077 | 106.021 | -90.367 | 1.00 | 38.67  | B | C |
| ATOM | 3383 | OG1 | THR | B | 364 | 99.972  | 106.268 | -91.246 | 1.00 | 38.67  | B | O |
| ATOM | 3384 | CG2 | THR | B | 364 | 100.673 | 106.363 | -88.942 | 1.00 | 38.67  | B | C |
| ATOM | 3385 | C   | THR | B | 364 | 103.440 | 106.634 | -89.839 | 1.00 | 38.67  | B | C |
| ATOM | 3386 | O   | THR | B | 364 | 103.819 | 107.524 | -89.078 | 1.00 | 38.67  | B | O |
| ATOM | 3387 | N   | ILE | B | 365 | 103.997 | 105.428 | -89.877 | 1.00 | 87.97  | B | N |
| ATOM | 3388 | CA  | ILE | B | 365 | 105.123 | 105.077 | -89.020 | 1.00 | 87.97  | B | C |
| ATOM | 3389 | CB  | ILE | B | 365 | 105.605 | 103.637 | -89.282 | 1.00 | 87.97  | B | C |
| ATOM | 3390 | CG2 | ILE | B | 365 | 106.773 | 103.290 | -88.372 | 1.00 | 87.97  | B | C |
| ATOM | 3391 | CG1 | ILE | B | 365 | 104.457 | 102.645 | -89.087 | 1.00 | 87.97  | B | C |
| ATOM | 3392 | CD1 | ILE | B | 365 | 104.846 | 101.205 | -89.339 | 1.00 | 87.97  | B | C |
| ATOM | 3393 | C   | ILE | B | 365 | 106.287 | 106.037 | -89.236 | 1.00 | 87.97  | B | C |
| ATOM | 3394 | O   | ILE | B | 365 | 106.937 | 106.466 | -88.283 | 1.00 | 87.97  | B | O |
| ATOM | 3395 | N   | VAL | B | 366 | 106.541 | 106.369 | -90.497 | 1.00 | 48.90  | B | N |
| ATOM | 3396 | CA  | VAL | B | 366 | 107.617 | 107.287 | -90.854 | 1.00 | 48.90  | B | C |
| ATOM | 3397 | CB  | VAL | B | 366 | 107.750 | 107.425 | -92.383 | 1.00 | 48.90  | B | C |
| ATOM | 3398 | CG1 | VAL | B | 366 | 108.648 | 108.597 | -92.737 | 1.00 | 48.90  | B | C |
| ATOM | 3399 | CG2 | VAL | B | 366 | 108.279 | 106.133 | -92.989 | 1.00 | 48.90  | B | C |
| ATOM | 3400 | C   | VAL | B | 366 | 107.402 | 108.668 | -90.242 | 1.00 | 48.90  | B | C |
| ATOM | 3401 | O   | VAL | B | 366 | 108.322 | 109.253 | -89.670 | 1.00 | 48.90  | B | O |
| ATOM | 3402 | N   | THR | B | 367 | 106.183 | 109.182 | -90.362 | 1.00 | 54.03  | B | N |
| ATOM | 3403 | CA  | THR | B | 367 | 105.856 | 110.508 | -89.850 | 1.00 | 54.03  | B | C |
| ATOM | 3404 | CB  | THR | B | 367 | 104.466 | 110.969 | -90.330 | 1.00 | 54.03  | B | C |
| ATOM | 3405 | OG1 | THR | B | 367 | 104.431 | 110.981 | -91.762 | 1.00 | 54.03  | B | O |
| ATOM | 3406 | CG2 | THR | B | 367 | 104.158 | 112.364 | -89.808 | 1.00 | 54.03  | B | C |
| ATOM | 3407 | C   | THR | B | 367 | 105.899 | 110.555 | -88.325 | 1.00 | 54.03  | B | C |
| ATOM | 3408 | O   | THR | B | 367 | 106.422 | 111.503 | -87.740 | 1.00 | 54.03  | B | O |
| ATOM | 3409 | N   | MET | B | 368 | 105.348 | 109.528 | -87.688 | 1.00 | 56.02  | B | N |
| ATOM | 3410 | CA  | MET | B | 368 | 105.288 | 109.474 | -86.231 | 1.00 | 56.02  | B | C |
| ATOM | 3411 | CB  | MET | B | 368 | 104.423 | 108.297 | -85.772 | 1.00 | 56.02  | B | C |
| ATOM | 3412 | CG  | MET | B | 368 | 102.968 | 108.392 | -86.202 | 1.00 | 56.02  | B | C |
| ATOM | 3413 | SD  | MET | B | 368 | 101.966 | 107.031 | -85.576 | 1.00 | 56.02  | B | S |
| ATOM | 3414 | CE  | MET | B | 368 | 102.136 | 107.271 | -83.810 | 1.00 | 56.02  | B | C |
| ATOM | 3415 | C   | MET | B | 368 | 106.675 | 109.384 | -85.601 | 1.00 | 56.02  | B | C |
| ATOM | 3416 | O   | MET | B | 368 | 106.946 | 110.023 | -84.585 | 1.00 | 56.02  | B | O |
| ATOM | 3417 | N   | THR | B | 369 | 107.550 | 108.590 | -86.210 | 1.00 | 66.05  | B | N |
| ATOM | 3418 | CA  | THR | B | 369 | 108.903 | 108.408 | -85.696 | 1.00 | 66.05  | B | C |
| ATOM | 3419 | CB  | THR | B | 369 | 109.477 | 107.035 | -86.088 | 1.00 | 66.05  | B | C |
| ATOM | 3420 | OG1 | THR | B | 369 | 109.528 | 106.925 | -87.516 | 1.00 | 66.05  | B | O |
| ATOM | 3421 | CG2 | THR | B | 369 | 108.612 | 105.917 | -85.529 | 1.00 | 66.05  | B | C |
| ATOM | 3422 | C   | THR | B | 369 | 109.842 | 109.504 | -86.191 | 1.00 | 66.05  | B | C |
| ATOM | 3423 | O   | THR | B | 369 | 111.059 | 109.324 | -86.220 | 1.00 | 66.05  | B | O |
| ATOM | 3424 | N   | THR | B | 370 | 109.264 | 110.636 | -86.581 | 1.00 | 71.04  | B | N |
| ATOM | 3425 | CA  | THR | B | 370 | 110.032 | 111.791 | -87.040 | 1.00 | 71.04  | B | C |
| ATOM | 3426 | CB  | THR | B | 370 | 110.669 | 112.556 | -85.860 | 1.00 | 71.04  | B | C |
| ATOM | 3427 | OG1 | THR | B | 370 | 111.580 | 111.697 | -85.162 | 1.00 | 71.04  | B | O |
| ATOM | 3428 | CG2 | THR | B | 370 | 109.595 | 113.040 | -84.897 | 1.00 | 71.04  | B | C |
| ATOM | 3429 | C   | THR | B | 370 | 111.117 | 111.419 | -88.049 | 1.00 | 71.04  | B | C |
| ATOM | 3430 | O   | THR | B | 370 | 112.301 | 111.661 | -87.818 | 1.00 | 71.04  | B | O |
| ATOM | 3431 | N   | LEU | B | 371 | 110.704 | 110.834 | -89.169 | 1.00 | 149.24 | B | N |
| ATOM | 3432 | CA  | LEU | B | 371 | 111.637 | 110.464 | -90.226 | 1.00 | 149.24 | B | C |
| ATOM | 3433 | CB  | LEU | B | 371 | 111.456 | 108.996 | -90.616 | 1.00 | 149.24 | B | C |
| ATOM | 3434 | CG  | LEU | B | 371 | 111.753 | 107.955 | -89.537 | 1.00 | 149.24 | B | C |
| ATOM | 3435 | CD1 | LEU | B | 371 | 111.433 | 106.556 | -90.040 | 1.00 | 149.24 | B | C |
| ATOM | 3436 | CD2 | LEU | B | 371 | 113.202 | 108.048 | -89.091 | 1.00 | 149.24 | B | C |
| ATOM | 3437 | C   | LEU | B | 371 | 111.461 | 111.355 | -91.451 | 1.00 | 149.24 | B | C |
| ATOM | 3438 | O   | LEU | B | 371 | 112.311 | 112.192 | -91.748 | 1.00 | 149.24 | B | O |
| ATOM | 3439 | N   | GLY | B | 372 | 110.351 | 111.165 | -92.158 | 1.00 | 45.54  | B | N |

|      |      |     |     |   |     |         |         |          |      |        |   |   |
|------|------|-----|-----|---|-----|---------|---------|----------|------|--------|---|---|
| ATOM | 3440 | CA  | GLY | B | 372 | 110.052 | 111.953 | -93.339  | 1.00 | 45.54  | B | C |
| ATOM | 3441 | C   | GLY | B | 372 | 111.061 | 111.754 | -94.453  | 1.00 | 45.54  | B | C |
| ATOM | 3442 | O   | GLY | B | 372 | 112.001 | 112.536 | -94.595  | 1.00 | 45.54  | B | O |
| ATOM | 3443 | N   | TYR | B | 373 | 110.866 | 110.706 | -95.246  | 1.00 | 55.21  | B | N |
| ATOM | 3444 | CA  | TYR | B | 373 | 111.763 | 110.411 | -96.358  | 1.00 | 55.21  | B | C |
| ATOM | 3445 | CB  | TYR | B | 373 | 111.676 | 108.933 | -96.745  | 1.00 | 55.21  | B | C |
| ATOM | 3446 | CG  | TYR | B | 373 | 112.177 | 107.988 | -95.677  | 1.00 | 55.21  | B | C |
| ATOM | 3447 | CD1 | TYR | B | 373 | 111.313 | 107.463 | -94.725  | 1.00 | 55.21  | B | C |
| ATOM | 3448 | CD2 | TYR | B | 373 | 113.514 | 107.618 | -95.620  | 1.00 | 55.21  | B | C |
| ATOM | 3449 | CE1 | TYR | B | 373 | 111.767 | 106.598 | -93.747  | 1.00 | 55.21  | B | C |
| ATOM | 3450 | CE2 | TYR | B | 373 | 113.976 | 106.754 | -94.646  | 1.00 | 55.21  | B | C |
| ATOM | 3451 | CZ  | TYR | B | 373 | 113.099 | 106.247 | -93.712  | 1.00 | 55.21  | B | C |
| ATOM | 3452 | OH  | TYR | B | 373 | 113.557 | 105.386 | -92.741  | 1.00 | 55.21  | B | O |
| ATOM | 3453 | C   | TYR | B | 373 | 111.456 | 111.290 | -97.567  | 1.00 | 55.21  | B | C |
| ATOM | 3454 | O   | TYR | B | 373 | 112.349 | 111.927 | -98.126  | 1.00 | 55.21  | B | O |
| ATOM | 3455 | N   | GLY | B | 374 | 110.188 | 111.318 | -97.965  | 1.00 | 26.05  | B | N |
| ATOM | 3456 | CA  | GLY | B | 374 | 109.764 | 112.121 | -99.097  | 1.00 | 26.05  | B | C |
| ATOM | 3457 | C   | GLY | B | 374 | 109.167 | 111.289 | -100.215 | 1.00 | 26.05  | B | C |
| ATOM | 3458 | O   | GLY | B | 374 | 108.685 | 111.826 | -101.212 | 1.00 | 26.05  | B | O |
| ATOM | 3459 | N   | ASP | B | 375 | 109.200 | 109.970 | -100.049 | 1.00 | 57.71  | B | N |
| ATOM | 3460 | CA  | ASP | B | 375 | 108.661 | 109.059 | -101.052 | 1.00 | 57.71  | B | C |
| ATOM | 3461 | CB  | ASP | B | 375 | 109.104 | 107.621 | -100.770 | 1.00 | 57.71  | B | C |
| ATOM | 3462 | CG  | ASP | B | 375 | 108.559 | 107.088 | -99.458  | 1.00 | 57.71  | B | C |
| ATOM | 3463 | OD1 | ASP | B | 375 | 108.403 | 107.881 | -98.506  | 1.00 | 57.71  | B | O |
| ATOM | 3464 | OD2 | ASP | B | 375 | 108.287 | 105.871 | -99.378  | 1.00 | 57.71  | B | O |
| ATOM | 3465 | C   | ASP | B | 375 | 107.139 | 109.139 | -101.113 | 1.00 | 57.71  | B | C |
| ATOM | 3466 | O   | ASP | B | 375 | 106.534 | 108.849 | -102.145 | 1.00 | 57.71  | B | O |
| ATOM | 3467 | N   | MET | B | 376 | 106.527 | 109.534 | -100.001 | 1.00 | 56.92  | B | N |
| ATOM | 3468 | CA  | MET | B | 376 | 105.076 | 109.661 | -99.927  | 1.00 | 56.92  | B | C |
| ATOM | 3469 | CB  | MET | B | 376 | 104.464 | 108.435 | -99.246  | 1.00 | 56.92  | B | C |
| ATOM | 3470 | CG  | MET | B | 376 | 104.730 | 107.124 | -99.968  | 1.00 | 56.92  | B | C |
| ATOM | 3471 | SD  | MET | B | 376 | 104.032 | 105.702 | -99.105  | 1.00 | 56.92  | B | S |
| ATOM | 3472 | CE  | MET | B | 376 | 102.292 | 106.123 | -99.110  | 1.00 | 56.92  | B | C |
| ATOM | 3473 | C   | MET | B | 376 | 104.679 | 110.928 | -99.177  | 1.00 | 56.92  | B | C |
| ATOM | 3474 | O   | MET | B | 376 | 104.985 | 111.080 | -97.994  | 1.00 | 56.92  | B | O |
| ATOM | 3475 | N   | VAL | B | 377 | 104.000 | 111.835 | -99.870  | 1.00 | 110.24 | B | N |
| ATOM | 3476 | CA  | VAL | B | 377 | 103.562 | 113.089 | -99.265  | 1.00 | 110.24 | B | C |
| ATOM | 3477 | CB  | VAL | B | 377 | 104.531 | 114.245 | -99.590  | 1.00 | 110.24 | B | C |
| ATOM | 3478 | CG1 | VAL | B | 377 | 105.867 | 114.033 | -98.895  | 1.00 | 110.24 | B | C |
| ATOM | 3479 | CG2 | VAL | B | 377 | 104.718 | 114.378 | -101.094 | 1.00 | 110.24 | B | C |
| ATOM | 3480 | C   | VAL | B | 377 | 102.155 | 113.470 | -99.718  | 1.00 | 110.24 | B | C |
| ATOM | 3481 | O   | VAL | B | 377 | 101.815 | 113.325 | -100.892 | 1.00 | 110.24 | B | O |
| ATOM | 3482 | N   | PRO | B | 378 | 101.331 | 113.955 | -98.777  | 1.00 | 157.59 | B | N |
| ATOM | 3483 | CA  | PRO | B | 378 | 99.962  | 114.398 | -99.063  | 1.00 | 157.59 | B | C |
| ATOM | 3484 | CD  | PRO | B | 378 | 101.654 | 114.052 | -97.344  | 1.00 | 157.59 | B | C |
| ATOM | 3485 | CB  | PRO | B | 378 | 99.476  | 114.920 | -97.708  | 1.00 | 157.59 | B | C |
| ATOM | 3486 | CG  | PRO | B | 378 | 100.308 | 114.198 | -96.705  | 1.00 | 157.59 | B | C |
| ATOM | 3487 | C   | PRO | B | 378 | 99.938  | 115.522 | -100.093 | 1.00 | 157.59 | B | C |
| ATOM | 3488 | O   | PRO | B | 378 | 100.960 | 116.172 | -100.317 | 1.00 | 157.59 | B | O |
| ATOM | 3489 | N   | LYS | B | 379 | 98.781  | 115.747 | -100.708 | 1.00 | 201.84 | B | N |
| ATOM | 3490 | CA  | LYS | B | 379 | 98.644  | 116.789 | -101.719 | 1.00 | 201.84 | B | C |
| ATOM | 3491 | CB  | LYS | B | 379 | 98.486  | 116.168 | -103.109 | 1.00 | 201.84 | B | C |
| ATOM | 3492 | CG  | LYS | B | 379 | 99.639  | 115.267 | -103.522 | 1.00 | 201.84 | B | C |
| ATOM | 3493 | CD  | LYS | B | 379 | 100.955 | 116.028 | -103.554 | 1.00 | 201.84 | B | C |
| ATOM | 3494 | CE  | LYS | B | 379 | 100.915 | 117.161 | -104.566 | 1.00 | 201.84 | B | C |
| ATOM | 3495 | NZ  | LYS | B | 379 | 102.204 | 117.905 | -104.616 | 1.00 | 201.84 | B | N |
| ATOM | 3496 | C   | LYS | B | 379 | 97.463  | 117.707 | -101.420 | 1.00 | 201.84 | B | C |
| ATOM | 3497 | O   | LYS | B | 379 | 97.517  | 118.908 | -101.685 | 1.00 | 201.84 | B | O |
| ATOM | 3498 | N   | THR | B | 380 | 96.398  | 117.136 | -100.866 | 1.00 | 144.37 | B | N |
| ATOM | 3499 | CA  | THR | B | 380 | 95.197  | 117.902 | -100.552 | 1.00 | 144.37 | B | C |
| ATOM | 3500 | CB  | THR | B | 380 | 93.946  | 117.004 | -100.526 | 1.00 | 144.37 | B | C |
| ATOM | 3501 | OG1 | THR | B | 380 | 94.102  | 115.990 | -99.526  | 1.00 | 144.37 | B | O |
| ATOM | 3502 | CG2 | THR | B | 380 | 93.733  | 116.346 | -101.881 | 1.00 | 144.37 | B | C |
| ATOM | 3503 | C   | THR | B | 380 | 95.323  | 118.619 | -99.212  | 1.00 | 144.37 | B | C |
| ATOM | 3504 | O   | THR | B | 380 | 96.305  | 118.443 | -98.491  | 1.00 | 144.37 | B | O |
| ATOM | 3505 | N   | ILE | B | 381 | 94.320  | 119.428 | -98.886  | 1.00 | 82.77  | B | N |
| ATOM | 3506 | CA  | ILE | B | 381 | 94.309  | 120.171 | -97.631  | 1.00 | 82.77  | B | C |
| ATOM | 3507 | CB  | ILE | B | 381 | 93.380  | 121.402 | -97.702  | 1.00 | 82.77  | B | C |

|      |      |     |     |   |     |         |         |          |      |        |   |   |
|------|------|-----|-----|---|-----|---------|---------|----------|------|--------|---|---|
| ATOM | 3508 | CG2 | ILE | B | 381 | 93.197  | 122.012 | -96.321  | 1.00 | 82.77  | B | C |
| ATOM | 3509 | CG1 | ILE | B | 381 | 93.939  | 122.449 | -98.669  | 1.00 | 82.77  | B | C |
| ATOM | 3510 | CD1 | ILE | B | 381 | 93.820  | 122.075 | -100.132 | 1.00 | 82.77  | B | C |
| ATOM | 3511 | C   | ILE | B | 381 | 93.871  | 119.276 | -96.476  | 1.00 | 82.77  | B | C |
| ATOM | 3512 | O   | ILE | B | 381 | 94.441  | 119.330 | -95.386  | 1.00 | 82.77  | B | O |
| ATOM | 3513 | N   | ALA | B | 382 | 92.857  | 118.453 | -96.723  | 1.00 | 53.32  | B | N |
| ATOM | 3514 | CA  | ALA | B | 382 | 92.353  | 117.534 | -95.709  | 1.00 | 53.32  | B | C |
| ATOM | 3515 | CB  | ALA | B | 382 | 91.160  | 116.757 | -96.243  | 1.00 | 53.32  | B | C |
| ATOM | 3516 | C   | ALA | B | 382 | 93.448  | 116.580 | -95.243  | 1.00 | 53.32  | B | C |
| ATOM | 3517 | O   | ALA | B | 382 | 93.538  | 116.252 | -94.060  | 1.00 | 53.32  | B | O |
| ATOM | 3518 | N   | GLY | B | 383 | 94.280  | 116.139 | -96.181  | 1.00 | 35.60  | B | N |
| ATOM | 3519 | CA  | GLY | B | 383 | 95.379  | 115.246 | -95.867  | 1.00 | 35.60  | B | C |
| ATOM | 3520 | C   | GLY | B | 383 | 96.544  | 115.979 | -95.232  | 1.00 | 35.60  | B | C |
| ATOM | 3521 | O   | GLY | B | 383 | 97.398  | 115.370 | -94.588  | 1.00 | 35.60  | B | O |
| ATOM | 3522 | N   | LYS | B | 384 | 96.577  | 117.295 | -95.416  | 1.00 | 53.39  | B | N |
| ATOM | 3523 | CA  | LYS | B | 384 | 97.637  | 118.122 | -94.853  | 1.00 | 53.39  | B | C |
| ATOM | 3524 | CB  | LYS | B | 384 | 97.682  | 119.483 | -95.551  | 1.00 | 53.39  | B | C |
| ATOM | 3525 | CG  | LYS | B | 384 | 98.726  | 120.434 | -94.991  | 1.00 | 53.39  | B | C |
| ATOM | 3526 | CD  | LYS | B | 384 | 98.735  | 121.752 | -95.748  | 1.00 | 53.39  | B | C |
| ATOM | 3527 | CE  | LYS | B | 384 | 99.047  | 121.540 | -97.220  | 1.00 | 53.39  | B | C |
| ATOM | 3528 | NZ  | LYS | B | 384 | 100.374 | 120.896 | -97.418  | 1.00 | 53.39  | B | N |
| ATOM | 3529 | C   | LYS | B | 384 | 97.447  | 118.309 | -93.352  | 1.00 | 53.39  | B | C |
| ATOM | 3530 | O   | LYS | B | 384 | 98.409  | 118.275 | -92.586  | 1.00 | 53.39  | B | O |
| ATOM | 3531 | N   | ILE | B | 385 | 96.199  | 118.506 | -92.940  | 1.00 | 33.52  | B | N |
| ATOM | 3532 | CA  | ILE | B | 385 | 95.877  | 118.688 | -91.530  | 1.00 | 33.52  | B | C |
| ATOM | 3533 | CB  | ILE | B | 385 | 94.420  | 119.149 | -91.339  | 1.00 | 33.52  | B | C |
| ATOM | 3534 | CG2 | ILE | B | 385 | 94.109  | 119.339 | -89.863  | 1.00 | 33.52  | B | C |
| ATOM | 3535 | CG1 | ILE | B | 385 | 94.164  | 120.442 | -92.116  | 1.00 | 33.52  | B | C |
| ATOM | 3536 | CD1 | ILE | B | 385 | 92.747  | 120.960 | -91.991  | 1.00 | 33.52  | B | C |
| ATOM | 3537 | C   | ILE | B | 385 | 96.098  | 117.397 | -90.749  | 1.00 | 33.52  | B | C |
| ATOM | 3538 | O   | ILE | B | 385 | 96.676  | 117.408 | -89.662  | 1.00 | 33.52  | B | O |
| ATOM | 3539 | N   | PHE | B | 386 | 95.634  | 116.286 | -91.311  | 1.00 | 111.88 | B | N |
| ATOM | 3540 | CA  | PHE | B | 386 | 95.785  | 114.983 | -90.674  | 1.00 | 111.88 | B | C |
| ATOM | 3541 | CB  | PHE | B | 386 | 94.978  | 113.923 | -91.426  | 1.00 | 111.88 | B | C |
| ATOM | 3542 | CG  | PHE | B | 386 | 93.502  | 114.199 | -91.466  | 1.00 | 111.88 | B | C |
| ATOM | 3543 | CD1 | PHE | B | 386 | 92.902  | 114.976 | -90.488  | 1.00 | 111.88 | B | C |
| ATOM | 3544 | CD2 | PHE | B | 386 | 92.715  | 113.685 | -92.482  | 1.00 | 111.88 | B | C |
| ATOM | 3545 | CE1 | PHE | B | 386 | 91.544  | 115.233 | -90.523  | 1.00 | 111.88 | B | C |
| ATOM | 3546 | CE2 | PHE | B | 386 | 91.357  | 113.938 | -92.523  | 1.00 | 111.88 | B | C |
| ATOM | 3547 | CZ  | PHE | B | 386 | 90.771  | 114.713 | -91.542  | 1.00 | 111.88 | B | C |
| ATOM | 3548 | C   | PHE | B | 386 | 97.253  | 114.576 | -90.602  | 1.00 | 111.88 | B | C |
| ATOM | 3549 | O   | PHE | B | 386 | 97.675  | 113.899 | -89.664  | 1.00 | 111.88 | B | O |
| ATOM | 3550 | N   | GLY | B | 387 | 98.028  | 114.995 | -91.597  | 1.00 | 27.68  | B | N |
| ATOM | 3551 | CA  | GLY | B | 387 | 99.447  | 114.696 | -91.636  | 1.00 | 27.68  | B | C |
| ATOM | 3552 | C   | GLY | B | 387 | 100.210 | 115.413 | -90.540  | 1.00 | 27.68  | B | C |
| ATOM | 3553 | O   | GLY | B | 387 | 101.256 | 114.946 | -90.088  | 1.00 | 27.68  | B | O |
| ATOM | 3554 | N   | SER | B | 388 | 99.682  | 116.555 | -90.111  | 1.00 | 31.06  | B | N |
| ATOM | 3555 | CA  | SER | B | 388 | 100.304 | 117.335 | -89.048  | 1.00 | 31.06  | B | C |
| ATOM | 3556 | CB  | SER | B | 388 | 99.819  | 118.785 | -89.094  | 1.00 | 31.06  | B | C |
| ATOM | 3557 | OG  | SER | B | 388 | 100.139 | 119.391 | -90.334  | 1.00 | 31.06  | B | O |
| ATOM | 3558 | C   | SER | B | 388 | 100.006 | 116.726 | -87.682  | 1.00 | 31.06  | B | C |
| ATOM | 3559 | O   | SER | B | 388 | 100.886 | 116.641 | -86.825  | 1.00 | 31.06  | B | O |
| ATOM | 3560 | N   | ILE | B | 389 | 98.761  | 116.305 | -87.486  | 1.00 | 33.86  | B | N |
| ATOM | 3561 | CA  | ILE | B | 389 | 98.348  | 115.688 | -86.231  | 1.00 | 33.86  | B | C |
| ATOM | 3562 | CB  | ILE | B | 389 | 96.824  | 115.465 | -86.188  | 1.00 | 33.86  | B | C |
| ATOM | 3563 | CG2 | ILE | B | 389 | 96.410  | 114.859 | -84.854  | 1.00 | 33.86  | B | C |
| ATOM | 3564 | CG1 | ILE | B | 389 | 96.085  | 116.781 | -86.438  | 1.00 | 33.86  | B | C |
| ATOM | 3565 | CD1 | ILE | B | 389 | 94.577  | 116.651 | -86.415  | 1.00 | 33.86  | B | C |
| ATOM | 3566 | C   | ILE | B | 389 | 99.056  | 114.354 | -86.026  | 1.00 | 33.86  | B | C |
| ATOM | 3567 | O   | ILE | B | 389 | 99.396  | 113.986 | -84.902  | 1.00 | 33.86  | B | O |
| ATOM | 3568 | N   | CYS | B | 390 | 99.277  | 113.635 | -87.122  | 1.00 | 36.22  | B | N |
| ATOM | 3569 | CA  | CYS | B | 390 | 99.956  | 112.345 | -87.072  | 1.00 | 36.22  | B | C |
| ATOM | 3570 | CB  | CYS | B | 390 | 99.948  | 111.683 | -88.451  | 1.00 | 36.22  | B | C |
| ATOM | 3571 | SG  | CYS | B | 390 | 100.769 | 110.074 | -88.513  | 1.00 | 36.22  | B | S |
| ATOM | 3572 | C   | CYS | B | 390 | 101.388 | 112.497 | -86.573  | 1.00 | 36.22  | B | C |
| ATOM | 3573 | O   | CYS | B | 390 | 101.929 | 111.602 | -85.923  | 1.00 | 36.22  | B | O |
| ATOM | 3574 | N   | SER | B | 391 | 101.999 | 113.636 | -86.883  | 1.00 | 67.70  | B | N |
| ATOM | 3575 | CA  | SER | B | 391 | 103.366 | 113.912 | -86.461  | 1.00 | 67.70  | B | C |



|      |      |     |     |   |     |         |         |         |      |        |   |   |
|------|------|-----|-----|---|-----|---------|---------|---------|------|--------|---|---|
| ATOM | 3576 | CB  | SER | B | 391 | 103.994 | 114.989 | -87.348 | 1.00 | 67.70  | B | C |
| ATOM | 3577 | OG  | SER | B | 391 | 105.329 | 115.255 | -86.956 | 1.00 | 67.70  | B | O |
| ATOM | 3578 | C   | SER | B | 391 | 103.412 | 114.343 | -84.999 | 1.00 | 67.70  | B | C |
| ATOM | 3579 | O   | SER | B | 391 | 104.327 | 113.974 | -84.261 | 1.00 | 67.70  | B | O |
| ATOM | 3580 | N   | LEU | B | 392 | 102.420 | 115.125 | -84.586 | 1.00 | 41.51  | B | N |
| ATOM | 3581 | CA  | LEU | B | 392 | 102.337 | 115.592 | -83.208 | 1.00 | 41.51  | B | C |
| ATOM | 3582 | CB  | LEU | B | 392 | 101.244 | 116.652 | -83.065 | 1.00 | 41.51  | B | C |
| ATOM | 3583 | CG  | LEU | B | 392 | 101.422 | 117.923 | -83.897 | 1.00 | 41.51  | B | C |
| ATOM | 3584 | CD1 | LEU | B | 392 | 100.245 | 118.866 | -83.699 | 1.00 | 41.51  | B | C |
| ATOM | 3585 | CD2 | LEU | B | 392 | 102.731 | 118.611 | -83.547 | 1.00 | 41.51  | B | C |
| ATOM | 3586 | C   | LEU | B | 392 | 102.070 | 114.430 | -82.257 | 1.00 | 41.51  | B | C |
| ATOM | 3587 | O   | LEU | B | 392 | 102.747 | 114.279 | -81.240 | 1.00 | 41.51  | B | O |
| ATOM | 3588 | N   | SER | B | 393 | 101.079 | 113.613 | -82.597 | 1.00 | 31.53  | B | N |
| ATOM | 3589 | CA  | SER | B | 393 | 100.741 | 112.445 | -81.794 | 1.00 | 31.53  | B | C |
| ATOM | 3590 | CB  | SER | B | 393 | 99.457  | 111.793 | -82.310 | 1.00 | 31.53  | B | C |
| ATOM | 3591 | OG  | SER | B | 393 | 98.366  | 112.695 | -82.249 | 1.00 | 31.53  | B | O |
| ATOM | 3592 | C   | SER | B | 393 | 101.883 | 111.435 | -81.806 | 1.00 | 31.53  | B | C |
| ATOM | 3593 | O   | SER | B | 393 | 102.082 | 110.697 | -80.842 | 1.00 | 31.53  | B | O |
| ATOM | 3594 | N   | GLY | B | 394 | 102.631 | 111.411 | -82.904 | 1.00 | 30.12  | B | N |
| ATOM | 3595 | CA  | GLY | B | 394 | 103.760 | 110.509 | -83.039 | 1.00 | 30.12  | B | C |
| ATOM | 3596 | C   | GLY | B | 394 | 104.825 | 110.761 | -81.990 | 1.00 | 30.12  | B | C |
| ATOM | 3597 | O   | GLY | B | 394 | 105.382 | 109.823 | -81.420 | 1.00 | 30.12  | B | O |
| ATOM | 3598 | N   | VAL | B | 395 | 105.107 | 112.035 | -81.734 | 1.00 | 95.83  | B | N |
| ATOM | 3599 | CA  | VAL | B | 395 | 106.098 | 112.413 | -80.735 | 1.00 | 95.83  | B | C |
| ATOM | 3600 | CB  | VAL | B | 395 | 106.427 | 113.917 | -80.807 | 1.00 | 95.83  | B | C |
| ATOM | 3601 | CG1 | VAL | B | 395 | 107.438 | 114.291 | -79.734 | 1.00 | 95.83  | B | C |
| ATOM | 3602 | CG2 | VAL | B | 395 | 106.948 | 114.279 | -82.189 | 1.00 | 95.83  | B | C |
| ATOM | 3603 | C   | VAL | B | 395 | 105.610 | 112.071 | -79.331 | 1.00 | 95.83  | B | C |
| ATOM | 3604 | O   | VAL | B | 395 | 106.380 | 111.604 | -78.492 | 1.00 | 95.83  | B | O |
| ATOM | 3605 | N   | LEU | B | 396 | 104.325 | 112.301 | -79.084 | 1.00 | 88.54  | B | N |
| ATOM | 3606 | CA  | LEU | B | 396 | 103.729 | 112.023 | -77.783 | 1.00 | 88.54  | B | C |
| ATOM | 3607 | CB  | LEU | B | 396 | 102.300 | 112.567 | -77.722 | 1.00 | 88.54  | B | C |
| ATOM | 3608 | CG  | LEU | B | 396 | 102.126 | 114.075 | -77.912 | 1.00 | 88.54  | B | C |
| ATOM | 3609 | CD1 | LEU | B | 396 | 100.653 | 114.440 | -78.010 | 1.00 | 88.54  | B | C |
| ATOM | 3610 | CD2 | LEU | B | 396 | 102.797 | 114.840 | -76.782 | 1.00 | 88.54  | B | C |
| ATOM | 3611 | C   | LEU | B | 396 | 103.728 | 110.529 | -77.476 | 1.00 | 88.54  | B | C |
| ATOM | 3612 | O   | LEU | B | 396 | 104.289 | 110.091 | -76.472 | 1.00 | 88.54  | B | O |
| ATOM | 3613 | N   | VAL | B | 397 | 103.094 | 109.754 | -78.351 | 1.00 | 41.21  | B | N |
| ATOM | 3614 | CA  | VAL | B | 397 | 102.963 | 108.312 | -78.163 | 1.00 | 41.21  | B | C |
| ATOM | 3615 | CB  | VAL | B | 397 | 102.325 | 107.640 | -79.396 | 1.00 | 41.21  | B | C |
| ATOM | 3616 | CG1 | VAL | B | 397 | 102.396 | 106.126 | -79.275 | 1.00 | 41.21  | B | C |
| ATOM | 3617 | CG2 | VAL | B | 397 | 100.885 | 108.103 | -79.567 | 1.00 | 41.21  | B | C |
| ATOM | 3618 | C   | VAL | B | 397 | 104.298 | 107.634 | -77.861 | 1.00 | 41.21  | B | C |
| ATOM | 3619 | O   | VAL | B | 397 | 104.388 | 106.800 | -76.960 | 1.00 | 41.21  | B | O |
| ATOM | 3620 | N   | ILE | B | 398 | 105.330 | 107.996 | -78.615 | 1.00 | 120.02 | B | N |
| ATOM | 3621 | CA  | ILE | B | 398 | 106.643 | 107.380 | -78.458 | 1.00 | 120.02 | B | C |
| ATOM | 3622 | CB  | ILE | B | 398 | 107.543 | 107.648 | -79.681 | 1.00 | 120.02 | B | C |
| ATOM | 3623 | CG2 | ILE | B | 398 | 108.920 | 107.035 | -79.474 | 1.00 | 120.02 | B | C |
| ATOM | 3624 | CG1 | ILE | B | 398 | 106.896 | 107.094 | -80.951 | 1.00 | 120.02 | B | C |
| ATOM | 3625 | CD1 | ILE | B | 398 | 107.715 | 107.323 | -82.203 | 1.00 | 120.02 | B | C |
| ATOM | 3626 | C   | ILE | B | 398 | 107.358 | 107.853 | -77.195 | 1.00 | 120.02 | B | C |
| ATOM | 3627 | O   | ILE | B | 398 | 108.019 | 107.067 | -76.517 | 1.00 | 120.02 | B | O |
| ATOM | 3628 | N   | ALA | B | 399 | 107.217 | 109.136 | -76.878 | 1.00 | 64.31  | B | N |
| ATOM | 3629 | CA  | ALA | B | 399 | 107.923 | 109.725 | -75.743 | 1.00 | 64.31  | B | C |
| ATOM | 3630 | CB  | ALA | B | 399 | 108.038 | 111.234 | -75.916 | 1.00 | 64.31  | B | C |
| ATOM | 3631 | C   | ALA | B | 399 | 107.278 | 109.390 | -74.399 | 1.00 | 64.31  | B | C |
| ATOM | 3632 | O   | ALA | B | 399 | 107.505 | 110.084 | -73.409 | 1.00 | 64.31  | B | O |
| ATOM | 3633 | N   | LEU | B | 400 | 106.479 | 108.328 | -74.365 | 1.00 | 75.94  | B | N |
| ATOM | 3634 | CA  | LEU | B | 400 | 105.827 | 107.910 | -73.126 | 1.00 | 75.94  | B | C |
| ATOM | 3635 | CB  | LEU | B | 400 | 104.317 | 107.740 | -73.327 | 1.00 | 75.94  | B | C |
| ATOM | 3636 | CG  | LEU | B | 400 | 103.526 | 108.994 | -73.705 | 1.00 | 75.94  | B | C |
| ATOM | 3637 | CD1 | LEU | B | 400 | 102.067 | 108.651 | -73.961 | 1.00 | 75.94  | B | C |
| ATOM | 3638 | CD2 | LEU | B | 400 | 103.651 | 110.056 | -72.625 | 1.00 | 75.94  | B | C |
| ATOM | 3639 | C   | LEU | B | 400 | 106.442 | 106.638 | -72.537 | 1.00 | 75.94  | B | C |
| ATOM | 3640 | O   | LEU | B | 400 | 106.837 | 106.625 | -71.371 | 1.00 | 75.94  | B | O |
| ATOM | 3641 | N   | PRO | B | 401 | 106.521 | 105.561 | -73.337 | 1.00 | 77.22  | B | N |
| ATOM | 3642 | CA  | PRO | B | 401 | 107.116 | 104.317 | -72.837 | 1.00 | 77.22  | B | C |
| ATOM | 3643 | CD  | PRO | B | 401 | 105.967 | 105.392 | -74.690 | 1.00 | 77.22  | B | C |

|      |      |     |     |   |     |         |         |         |      |        |   |   |
|------|------|-----|-----|---|-----|---------|---------|---------|------|--------|---|---|
| ATOM | 3644 | CB  | PRO | B | 401 | 106.779 | 103.299 | -73.936 | 1.00 | 77.22  | B | C |
| ATOM | 3645 | CG  | PRO | B | 401 | 105.684 | 103.930 | -74.741 | 1.00 | 77.22  | B | C |
| ATOM | 3646 | C   | PRO | B | 401 | 108.630 | 104.433 | -72.688 | 1.00 | 77.22  | B | C |
| ATOM | 3647 | O   | PRO | B | 401 | 109.217 | 103.766 | -71.836 | 1.00 | 77.22  | B | O |
| ATOM | 3648 | N   | VAL | B | 402 | 109.248 | 105.273 | -73.513 | 1.00 | 140.00 | B | N |
| ATOM | 3649 | CA  | VAL | B | 402 | 110.699 | 105.435 | -73.499 | 1.00 | 140.00 | B | C |
| ATOM | 3650 | CB  | VAL | B | 402 | 111.179 | 106.409 | -74.598 | 1.00 | 140.00 | B | C |
| ATOM | 3651 | CG1 | VAL | B | 402 | 112.677 | 106.643 | -74.482 | 1.00 | 140.00 | B | C |
| ATOM | 3652 | CG2 | VAL | B | 402 | 110.821 | 105.873 | -75.975 | 1.00 | 140.00 | B | C |
| ATOM | 3653 | C   | VAL | B | 402 | 111.242 | 105.882 | -72.139 | 1.00 | 140.00 | B | C |
| ATOM | 3654 | O   | VAL | B | 402 | 112.128 | 105.231 | -71.586 | 1.00 | 140.00 | B | O |
| ATOM | 3655 | N   | PRO | B | 403 | 110.714 | 106.992 | -71.594 | 1.00 | 65.75  | B | N |
| ATOM | 3656 | CA  | PRO | B | 403 | 111.211 | 107.500 | -70.310 | 1.00 | 65.75  | B | C |
| ATOM | 3657 | CD  | PRO | B | 403 | 109.639 | 107.841 | -72.138 | 1.00 | 65.75  | B | C |
| ATOM | 3658 | CB  | PRO | B | 403 | 110.197 | 108.588 | -69.954 | 1.00 | 65.75  | B | C |
| ATOM | 3659 | CG  | PRO | B | 403 | 109.694 | 109.063 | -71.267 | 1.00 | 65.75  | B | C |
| ATOM | 3660 | C   | PRO | B | 403 | 111.231 | 106.427 | -69.226 | 1.00 | 65.75  | B | C |
| ATOM | 3661 | O   | PRO | B | 403 | 112.153 | 106.396 | -68.411 | 1.00 | 65.75  | B | O |
| ATOM | 3662 | N   | VAL | B | 404 | 110.225 | 105.559 | -69.220 | 1.00 | 38.19  | B | N |
| ATOM | 3663 | CA  | VAL | B | 404 | 110.147 | 104.486 | -68.236 | 1.00 | 38.19  | B | C |
| ATOM | 3664 | CB  | VAL | B | 404 | 108.799 | 103.747 | -68.313 | 1.00 | 38.19  | B | C |
| ATOM | 3665 | CG1 | VAL | B | 404 | 108.751 | 102.625 | -67.287 | 1.00 | 38.19  | B | C |
| ATOM | 3666 | CG2 | VAL | B | 404 | 107.650 | 104.719 | -68.100 | 1.00 | 38.19  | B | C |
| ATOM | 3667 | C   | VAL | B | 404 | 111.281 | 103.485 | -68.433 | 1.00 | 38.19  | B | C |
| ATOM | 3668 | O   | VAL | B | 404 | 111.914 | 103.051 | -67.471 | 1.00 | 38.19  | B | O |
| ATOM | 3669 | N   | ILE | B | 405 | 111.531 | 103.124 | -69.687 | 1.00 | 45.11  | B | N |
| ATOM | 3670 | CA  | ILE | B | 405 | 112.603 | 102.194 | -70.019 | 1.00 | 45.11  | B | C |
| ATOM | 3671 | CB  | ILE | B | 405 | 112.558 | 101.794 | -71.507 | 1.00 | 45.11  | B | C |
| ATOM | 3672 | CG2 | ILE | B | 405 | 113.661 | 100.799 | -71.828 | 1.00 | 45.11  | B | C |
| ATOM | 3673 | CG1 | ILE | B | 405 | 111.187 | 101.213 | -71.860 | 1.00 | 45.11  | B | C |
| ATOM | 3674 | CD1 | ILE | B | 405 | 111.057 | 100.790 | -73.308 | 1.00 | 45.11  | B | C |
| ATOM | 3675 | C   | ILE | B | 405 | 113.966 | 102.803 | -69.702 | 1.00 | 45.11  | B | C |
| ATOM | 3676 | O   | ILE | B | 405 | 114.903 | 102.096 | -69.330 | 1.00 | 45.11  | B | O |
| ATOM | 3677 | N   | VAL | B | 406 | 114.066 | 104.120 | -69.850 | 1.00 | 96.58  | B | N |
| ATOM | 3678 | CA  | VAL | B | 406 | 115.309 | 104.832 | -69.578 | 1.00 | 96.58  | B | C |
| ATOM | 3679 | CB  | VAL | B | 406 | 115.214 | 106.312 | -69.994 | 1.00 | 96.58  | B | C |
| ATOM | 3680 | CG1 | VAL | B | 406 | 116.481 | 107.055 | -69.605 | 1.00 | 96.58  | B | C |
| ATOM | 3681 | CG2 | VAL | B | 406 | 114.957 | 106.427 | -71.489 | 1.00 | 96.58  | B | C |
| ATOM | 3682 | C   | VAL | B | 406 | 115.682 | 104.753 | -68.102 | 1.00 | 96.58  | B | C |
| ATOM | 3683 | O   | VAL | B | 406 | 116.832 | 104.484 | -67.756 | 1.00 | 96.58  | B | O |
| ATOM | 3684 | N   | SER | B | 407 | 114.701 | 104.990 | -67.236 | 1.00 | 31.59  | B | N |
| ATOM | 3685 | CA  | SER | B | 407 | 114.922 | 104.951 | -65.795 | 1.00 | 31.59  | B | C |
| ATOM | 3686 | CB  | SER | B | 407 | 113.628 | 105.275 | -65.046 | 1.00 | 31.59  | B | C |
| ATOM | 3687 | OG  | SER | B | 407 | 113.832 | 105.261 | -63.644 | 1.00 | 31.59  | B | O |
| ATOM | 3688 | C   | SER | B | 407 | 115.456 | 103.592 | -65.354 | 1.00 | 31.59  | B | C |
| ATOM | 3689 | O   | SER | B | 407 | 116.285 | 103.505 | -64.448 | 1.00 | 31.59  | B | O |
| ATOM | 3690 | N   | ASN | B | 408 | 114.976 | 102.535 | -66.001 | 1.00 | 49.82  | B | N |
| ATOM | 3691 | CA  | ASN | B | 408 | 115.415 | 101.180 | -65.688 | 1.00 | 49.82  | B | C |
| ATOM | 3692 | CB  | ASN | B | 408 | 114.376 | 100.158 | -66.154 | 1.00 | 49.82  | B | C |
| ATOM | 3693 | CG  | ASN | B | 408 | 113.032 | 100.346 | -65.479 | 1.00 | 49.82  | B | C |
| ATOM | 3694 | OD1 | ASN | B | 408 | 112.957 | 100.791 | -64.334 | 1.00 | 49.82  | B | O |
| ATOM | 3695 | ND2 | ASN | B | 408 | 111.961 | 100.009 | -66.187 | 1.00 | 49.82  | B | N |
| ATOM | 3696 | C   | ASN | B | 408 | 116.775 | 100.866 | -66.301 | 1.00 | 49.82  | B | C |
| ATOM | 3697 | O   | ASN | B | 408 | 117.547 | 100.079 | -65.753 | 1.00 | 49.82  | B | O |
| ATOM | 3698 | N   | PHE | B | 409 | 117.063 | 101.489 | -67.439 | 1.00 | 43.30  | B | N |
| ATOM | 3699 | CA  | PHE | B | 409 | 118.339 | 101.294 | -68.119 | 1.00 | 43.30  | B | C |
| ATOM | 3700 | CB  | PHE | B | 409 | 118.299 | 101.908 | -69.519 | 1.00 | 43.30  | B | C |
| ATOM | 3701 | CG  | PHE | B | 409 | 119.584 | 101.760 | -70.284 | 1.00 | 43.30  | B | C |
| ATOM | 3702 | CD1 | PHE | B | 409 | 119.839 | 100.616 | -71.022 | 1.00 | 43.30  | B | C |
| ATOM | 3703 | CD2 | PHE | B | 409 | 120.536 | 102.766 | -70.267 | 1.00 | 43.30  | B | C |
| ATOM | 3704 | CE1 | PHE | B | 409 | 121.019 | 100.477 | -71.727 | 1.00 | 43.30  | B | C |
| ATOM | 3705 | CE2 | PHE | B | 409 | 121.718 | 102.633 | -70.970 | 1.00 | 43.30  | B | C |
| ATOM | 3706 | CZ  | PHE | B | 409 | 121.960 | 101.487 | -71.701 | 1.00 | 43.30  | B | C |
| ATOM | 3707 | C   | PHE | B | 409 | 119.484 | 101.896 | -67.311 | 1.00 | 43.30  | B | C |
| ATOM | 3708 | O   | PHE | B | 409 | 120.540 | 101.281 | -67.162 | 1.00 | 43.30  | B | O |
| ATOM | 3709 | N   | SER | B | 410 | 119.268 | 103.101 | -66.794 | 1.00 | 71.88  | B | N |
| ATOM | 3710 | CA  | SER | B | 410 | 120.274 | 103.776 | -65.983 | 1.00 | 71.88  | B | C |
| ATOM | 3711 | CB  | SER | B | 410 | 119.912 | 105.251 | -65.796 | 1.00 | 71.88  | B | C |

|      |      |     |     |   |     |         |         |         |      |        |   |   |
|------|------|-----|-----|---|-----|---------|---------|---------|------|--------|---|---|
| ATOM | 3712 | OG  | SER | B | 410 | 119.835 | 105.920 | -67.043 | 1.00 | 71.88  | B | O |
| ATOM | 3713 | C   | SER | B | 410 | 120.423 | 103.096 | -64.627 | 1.00 | 71.88  | B | C |
| ATOM | 3714 | O   | SER | B | 410 | 121.475 | 103.176 | -63.993 | 1.00 | 71.88  | B | O |
| ATOM | 3715 | N   | ARG | B | 411 | 119.362 | 102.427 | -64.188 | 1.00 | 148.46 | B | N |
| ATOM | 3716 | CA  | ARG | B | 411 | 119.374 | 101.716 | -62.915 | 1.00 | 148.46 | B | C |
| ATOM | 3717 | CB  | ARG | B | 411 | 117.957 | 101.291 | -62.527 | 1.00 | 148.46 | B | C |
| ATOM | 3718 | CG  | ARG | B | 411 | 117.875 | 100.517 | -61.222 | 1.00 | 148.46 | B | C |
| ATOM | 3719 | CD  | ARG | B | 411 | 116.443 | 100.113 | -60.910 | 1.00 | 148.46 | B | C |
| ATOM | 3720 | NE  | ARG | B | 411 | 116.347 | 99.353  | -59.667 | 1.00 | 148.46 | B | N |
| ATOM | 3721 | CZ  | ARG | B | 411 | 116.439 | 98.029  | -59.591 | 1.00 | 148.46 | B | C |
| ATOM | 3722 | NH1 | ARG | B | 411 | 116.631 | 97.313  | -60.690 | 1.00 | 148.46 | B | N |
| ATOM | 3723 | NH2 | ARG | B | 411 | 116.340 | 97.421  | -58.417 | 1.00 | 148.46 | B | N |
| ATOM | 3724 | C   | ARG | B | 411 | 120.287 | 100.497 | -62.981 | 1.00 | 148.46 | B | C |
| ATOM | 3725 | O   | ARG | B | 411 | 121.120 | 100.284 | -62.099 | 1.00 | 148.46 | B | O |
| ATOM | 3726 | N   | ILE | B | 412 | 120.124 | 99.699  | -64.031 | 1.00 | 95.71  | B | N |
| ATOM | 3727 | CA  | ILE | B | 412 | 120.940 | 98.506  | -64.224 | 1.00 | 95.71  | B | C |
| ATOM | 3728 | CB  | ILE | B | 412 | 120.397 | 97.632  | -65.371 | 1.00 | 95.71  | B | C |
| ATOM | 3729 | CG2 | ILE | B | 412 | 121.242 | 96.378  | -65.535 | 1.00 | 95.71  | B | C |
| ATOM | 3730 | CG1 | ILE | B | 412 | 118.933 | 97.267  | -65.117 | 1.00 | 95.71  | B | C |
| ATOM | 3731 | CD1 | ILE | B | 412 | 118.710 | 96.488  | -63.840 | 1.00 | 95.71  | B | C |
| ATOM | 3732 | C   | ILE | B | 412 | 122.389 | 98.878  | -64.521 | 1.00 | 95.71  | B | C |
| ATOM | 3733 | O   | ILE | B | 412 | 123.318 | 98.195  | -64.088 | 1.00 | 95.71  | B | O |
| ATOM | 3734 | N   | TYR | B | 413 | 122.574 | 99.967  | -65.260 | 1.00 | 110.37 | B | N |
| ATOM | 3735 | CA  | TYR | B | 413 | 123.908 | 100.432 | -65.619 | 1.00 | 110.37 | B | C |
| ATOM | 3736 | CB  | TYR | B | 413 | 123.821 | 101.611 | -66.590 | 1.00 | 110.37 | B | C |
| ATOM | 3737 | CG  | TYR | B | 413 | 125.164 | 102.113 | -67.070 | 1.00 | 110.37 | B | C |
| ATOM | 3738 | CD1 | TYR | B | 413 | 125.743 | 101.604 | -68.225 | 1.00 | 110.37 | B | C |
| ATOM | 3739 | CD2 | TYR | B | 413 | 125.852 | 103.095 | -66.371 | 1.00 | 110.37 | B | C |
| ATOM | 3740 | CE1 | TYR | B | 413 | 126.970 | 102.059 | -68.669 | 1.00 | 110.37 | B | C |
| ATOM | 3741 | CE2 | TYR | B | 413 | 127.080 | 103.556 | -66.807 | 1.00 | 110.37 | B | C |
| ATOM | 3742 | CZ  | TYR | B | 413 | 127.634 | 103.035 | -67.956 | 1.00 | 110.37 | B | C |
| ATOM | 3743 | OH  | TYR | B | 413 | 128.856 | 103.492 | -68.394 | 1.00 | 110.37 | B | O |
| ATOM | 3744 | C   | TYR | B | 413 | 124.704 | 100.830 | -64.380 | 1.00 | 110.37 | B | C |
| ATOM | 3745 | O   | TYR | B | 413 | 125.848 | 100.411 | -64.204 | 1.00 | 110.37 | B | O |
| ATOM | 3746 | N   | HIS | B | 414 | 124.090 | 101.640 | -63.523 | 1.00 | 72.45  | B | N |
| ATOM | 3747 | CA  | HIS | B | 414 | 124.740 | 102.097 | -62.300 | 1.00 | 72.45  | B | C |
| ATOM | 3748 | ND1 | HIS | B | 414 | 124.330 | 104.726 | -63.750 | 1.00 | 72.45  | B | N |
| ATOM | 3749 | CG  | HIS | B | 414 | 123.832 | 104.455 | -62.520 | 1.00 | 72.45  | B | C |
| ATOM | 3750 | CB  | HIS | B | 414 | 123.942 | 103.235 | -61.660 | 1.00 | 72.45  | B | C |
| ATOM | 3751 | NE2 | HIS | B | 414 | 123.212 | 106.492 | -63.085 | 1.00 | 72.45  | B | N |
| ATOM | 3752 | CD2 | HIS | B | 414 | 123.138 | 105.580 | -62.132 | 1.00 | 72.45  | B | C |
| ATOM | 3753 | CE1 | HIS | B | 414 | 123.929 | 105.999 | -64.078 | 1.00 | 72.45  | B | C |
| ATOM | 3754 | C   | HIS | B | 414 | 124.915 | 100.953 | -61.306 | 1.00 | 72.45  | B | C |
| ATOM | 3755 | O   | HIS | B | 414 | 125.786 | 101.000 | -60.437 | 1.00 | 72.45  | B | O |
| ATOM | 3756 | N   | GLN | B | 415 | 124.081 | 99.927  | -61.440 | 1.00 | 74.19  | B | N |
| ATOM | 3757 | CA  | GLN | B | 415 | 124.149 | 98.765  | -60.563 | 1.00 | 74.19  | B | C |
| ATOM | 3758 | CB  | GLN | B | 415 | 122.886 | 97.913  | -60.702 | 1.00 | 74.19  | B | C |
| ATOM | 3759 | CG  | GLN | B | 415 | 122.867 | 96.679  | -59.816 | 1.00 | 74.19  | B | C |
| ATOM | 3760 | CD  | GLN | B | 415 | 121.589 | 95.879  | -59.962 | 1.00 | 74.19  | B | C |
| ATOM | 3761 | OE1 | GLN | B | 415 | 120.711 | 96.229  | -60.750 | 1.00 | 74.19  | B | O |
| ATOM | 3762 | NE2 | GLN | B | 415 | 121.477 | 94.798  | -59.199 | 1.00 | 74.19  | B | N |
| ATOM | 3763 | C   | GLN | B | 415 | 125.385 | 97.925  | -60.868 | 1.00 | 74.19  | B | C |
| ATOM | 3764 | O   | GLN | B | 415 | 126.022 | 97.388  | -59.962 | 1.00 | 74.19  | B | O |
| ATOM | 3765 | N   | ASN | B | 416 | 125.719 | 97.819  | -62.150 | 1.00 | 34.42  | B | N |
| ATOM | 3766 | CA  | ASN | B | 416 | 126.882 | 97.053  | -62.580 | 1.00 | 34.42  | B | C |
| ATOM | 3767 | CB  | ASN | B | 416 | 126.722 | 96.615  | -64.039 | 1.00 | 34.42  | B | C |
| ATOM | 3768 | CG  | ASN | B | 416 | 127.781 | 95.616  | -64.471 | 1.00 | 34.42  | B | C |
| ATOM | 3769 | OD1 | ASN | B | 416 | 128.899 | 95.615  | -63.958 | 1.00 | 34.42  | B | O |
| ATOM | 3770 | ND2 | ASN | B | 416 | 127.429 | 94.758  | -65.422 | 1.00 | 34.42  | B | N |
| ATOM | 3771 | C   | ASN | B | 416 | 128.173 | 97.847  | -62.404 | 1.00 | 34.42  | B | C |
| ATOM | 3772 | O   | ASN | B | 416 | 129.163 | 97.336  | -61.879 | 1.00 | 34.42  | B | O |
| ATOM | 3773 | N   | GLN | B | 417 | 128.153 | 99.100  | -62.844 | 1.00 | 41.97  | B | N |
| ATOM | 3774 | CA  | GLN | B | 417 | 129.321 | 99.967  | -62.747 | 1.00 | 41.97  | B | C |
| ATOM | 3775 | CB  | GLN | B | 417 | 129.076 | 101.279 | -63.496 | 1.00 | 41.97  | B | C |
| ATOM | 3776 | CG  | GLN | B | 417 | 130.254 | 102.241 | -63.473 | 1.00 | 41.97  | B | C |
| ATOM | 3777 | CD  | GLN | B | 417 | 131.451 | 101.720 | -64.244 | 1.00 | 41.97  | B | C |
| ATOM | 3778 | OE1 | GLN | B | 417 | 131.213 | 100.762 | -65.132 | 1.00 | 41.97  | B | O |
| ATOM | 3779 | NE2 | GLN | B | 417 | 132.577 | 102.178 | -64.048 | 1.00 | 41.97  | B | N |

|      |      |     |     |   |     |         |         |         |      |        |   |   |
|------|------|-----|-----|---|-----|---------|---------|---------|------|--------|---|---|
| ATOM | 3780 | C   | GLN | B | 417 | 129.675 | 100.252 | -61.291 | 1.00 | 41.97  | B | C |
| ATOM | 3781 | O   | GLN | B | 417 | 128.804 | 100.286 | -60.422 | 1.00 | 41.97  | B | O |
| ATOM | 3782 | OXT | GLN | B | 417 | 130.839 | 100.457 | -60.947 | 1.00 | 41.97  | B | O |
| TER  |      |     |     |   |     |         |         |         |      |        |   |   |
| ATOM | 3783 | N   | PHE | C | 175 | 90.343  | 147.906 | -69.219 | 1.00 | 80.84  | C | N |
| ATOM | 3784 | CA  | PHE | C | 175 | 91.326  | 147.756 | -70.285 | 1.00 | 80.84  | C | C |
| ATOM | 3785 | CB  | PHE | C | 175 | 91.871  | 149.122 | -70.707 | 1.00 | 80.84  | C | C |
| ATOM | 3786 | CG  | PHE | C | 175 | 90.815  | 150.070 | -71.197 | 1.00 | 80.84  | C | C |
| ATOM | 3787 | CD1 | PHE | C | 175 | 90.432  | 150.073 | -72.528 | 1.00 | 80.84  | C | C |
| ATOM | 3788 | CD2 | PHE | C | 175 | 90.204  | 150.958 | -70.327 | 1.00 | 80.84  | C | C |
| ATOM | 3789 | CE1 | PHE | C | 175 | 89.459  | 150.943 | -72.982 | 1.00 | 80.84  | C | C |
| ATOM | 3790 | CE2 | PHE | C | 175 | 89.232  | 151.831 | -70.775 | 1.00 | 80.84  | C | C |
| ATOM | 3791 | CZ  | PHE | C | 175 | 88.859  | 151.824 | -72.104 | 1.00 | 80.84  | C | C |
| ATOM | 3792 | C   | PHE | C | 175 | 92.470  | 146.845 | -69.855 | 1.00 | 80.84  | C | C |
| ATOM | 3793 | O   | PHE | C | 175 | 93.246  | 146.372 | -70.686 | 1.00 | 80.84  | C | O |
| ATOM | 3794 | N   | GLU | C | 176 | 92.569  | 146.603 | -68.552 | 1.00 | 133.93 | C | N |
| ATOM | 3795 | CA  | GLU | C | 176 | 93.618  | 145.749 | -68.009 | 1.00 | 133.93 | C | C |
| ATOM | 3796 | CB  | GLU | C | 176 | 94.509  | 146.540 | -67.049 | 1.00 | 133.93 | C | C |
| ATOM | 3797 | CG  | GLU | C | 176 | 95.209  | 147.729 | -67.687 | 1.00 | 133.93 | C | C |
| ATOM | 3798 | CD  | GLU | C | 176 | 96.092  | 148.480 | -66.710 | 1.00 | 133.93 | C | C |
| ATOM | 3799 | OE1 | GLU | C | 176 | 96.153  | 148.076 | -65.530 | 1.00 | 133.93 | C | O |
| ATOM | 3800 | OE2 | GLU | C | 176 | 96.724  | 149.476 | -67.121 | 1.00 | 133.93 | C | O |
| ATOM | 3801 | C   | GLU | C | 176 | 93.024  | 144.538 | -67.296 | 1.00 | 133.93 | C | C |
| ATOM | 3802 | O   | GLU | C | 176 | 93.696  | 143.522 | -67.113 | 1.00 | 133.93 | C | O |
| ATOM | 3803 | N   | ASN | C | 177 | 91.762  | 144.653 | -66.898 | 1.00 | 62.69  | C | N |
| ATOM | 3804 | CA  | ASN | C | 177 | 91.077  | 143.570 | -66.201 | 1.00 | 62.69  | C | C |
| ATOM | 3805 | CB  | ASN | C | 177 | 90.927  | 143.902 | -64.715 | 1.00 | 62.69  | C | C |
| ATOM | 3806 | CG  | ASN | C | 177 | 92.262  | 144.127 | -64.031 | 1.00 | 62.69  | C | C |
| ATOM | 3807 | OD1 | ASN | C | 177 | 92.869  | 143.193 | -63.505 | 1.00 | 62.69  | C | O |
| ATOM | 3808 | ND2 | ASN | C | 177 | 92.727  | 145.371 | -64.035 | 1.00 | 62.69  | C | N |
| ATOM | 3809 | C   | ASN | C | 177 | 89.711  | 143.265 | -66.810 | 1.00 | 62.69  | C | C |
| ATOM | 3810 | O   | ASN | C | 177 | 88.692  | 143.776 | -66.347 | 1.00 | 62.69  | C | O |
| ATOM | 3811 | N   | PRO | C | 178 | 89.692  | 142.426 | -67.856 | 1.00 | 73.65  | C | N |
| ATOM | 3812 | CA  | PRO | C | 178 | 88.458  | 142.030 | -68.544 | 1.00 | 73.65  | C | C |
| ATOM | 3813 | CD  | PRO | C | 178 | 90.887  | 141.848 | -68.492 | 1.00 | 73.65  | C | C |
| ATOM | 3814 | CB  | PRO | C | 178 | 88.957  | 141.070 | -69.629 | 1.00 | 73.65  | C | C |
| ATOM | 3815 | CG  | PRO | C | 178 | 90.384  | 141.441 | -69.840 | 1.00 | 73.65  | C | C |
| ATOM | 3816 | C   | PRO | C | 178 | 87.490  | 141.303 | -67.615 | 1.00 | 73.65  | C | C |
| ATOM | 3817 | O   | PRO | C | 178 | 86.313  | 141.157 | -67.946 | 1.00 | 73.65  | C | O |
| ATOM | 3818 | N   | HIS | C | 179 | 87.985  | 140.855 | -66.465 | 1.00 | 64.97  | C | N |
| ATOM | 3819 | CA  | HIS | C | 179 | 87.160  | 140.125 | -65.509 | 1.00 | 64.97  | C | C |
| ATOM | 3820 | ND1 | HIS | C | 179 | 89.594  | 138.396 | -66.534 | 1.00 | 64.97  | C | N |
| ATOM | 3821 | CG  | HIS | C | 179 | 88.673  | 138.090 | -65.556 | 1.00 | 64.97  | C | C |
| ATOM | 3822 | CB  | HIS | C | 179 | 88.011  | 139.135 | -64.712 | 1.00 | 64.97  | C | C |
| ATOM | 3823 | NE2 | HIS | C | 179 | 89.387  | 136.263 | -66.542 | 1.00 | 64.97  | C | N |
| ATOM | 3824 | CD2 | HIS | C | 179 | 88.547  | 136.741 | -65.566 | 1.00 | 64.97  | C | C |
| ATOM | 3825 | CE1 | HIS | C | 179 | 90.007  | 137.282 | -67.112 | 1.00 | 64.97  | C | C |
| ATOM | 3826 | C   | HIS | C | 179 | 86.429  | 141.068 | -64.558 | 1.00 | 64.97  | C | C |
| ATOM | 3827 | O   | HIS | C | 179 | 85.775  | 140.624 | -63.614 | 1.00 | 64.97  | C | O |
| ATOM | 3828 | N   | THR | C | 180 | 86.543  | 142.368 | -64.810 | 1.00 | 98.23  | C | N |
| ATOM | 3829 | CA  | THR | C | 180 | 85.887  | 143.368 | -63.973 | 1.00 | 98.23  | C | C |
| ATOM | 3830 | CB  | THR | C | 180 | 86.391  | 144.789 | -64.288 | 1.00 | 98.23  | C | C |
| ATOM | 3831 | OG1 | THR | C | 180 | 87.786  | 144.885 | -63.976 | 1.00 | 98.23  | C | O |
| ATOM | 3832 | CG2 | THR | C | 180 | 85.623  | 145.817 | -63.471 | 1.00 | 98.23  | C | C |
| ATOM | 3833 | C   | THR | C | 180 | 84.372  | 143.326 | -64.140 | 1.00 | 98.23  | C | C |
| ATOM | 3834 | O   | THR | C | 180 | 83.633  | 143.220 | -63.162 | 1.00 | 98.23  | C | O |
| ATOM | 3835 | N   | SER | C | 181 | 83.916  | 143.408 | -65.386 | 1.00 | 37.88  | C | N |
| ATOM | 3836 | CA  | SER | C | 181 | 82.488  | 143.384 | -65.680 | 1.00 | 37.88  | C | C |
| ATOM | 3837 | CB  | SER | C | 181 | 81.898  | 144.793 | -65.586 | 1.00 | 37.88  | C | C |
| ATOM | 3838 | OG  | SER | C | 181 | 82.534  | 145.673 | -66.496 | 1.00 | 37.88  | C | O |
| ATOM | 3839 | C   | SER | C | 181 | 82.219  | 142.795 | -67.061 | 1.00 | 37.88  | C | C |
| ATOM | 3840 | O   | SER | C | 181 | 83.139  | 142.342 | -67.743 | 1.00 | 37.88  | C | O |
| ATOM | 3841 | N   | THR | C | 182 | 80.953  | 142.803 | -67.465 | 1.00 | 92.23  | C | N |
| ATOM | 3842 | CA  | THR | C | 182 | 80.561  | 142.278 | -68.767 | 1.00 | 92.23  | C | C |
| ATOM | 3843 | CB  | THR | C | 182 | 79.029  | 142.200 | -68.907 | 1.00 | 92.23  | C | C |
| ATOM | 3844 | OG1 | THR | C | 182 | 78.496  | 141.347 | -67.886 | 1.00 | 92.23  | C | O |
| ATOM | 3845 | CG2 | THR | C | 182 | 78.645  | 141.651 | -70.273 | 1.00 | 92.23  | C | C |
| ATOM | 3846 | C   | THR | C | 182 | 81.123  | 143.135 | -69.896 | 1.00 | 92.23  | C | C |

|      |      |     |     |   |     |        |         |         |      |        |   |   |
|------|------|-----|-----|---|-----|--------|---------|---------|------|--------|---|---|
| ATOM | 3847 | O   | THR | C | 182 | 81.651 | 142.614 | -70.879 | 1.00 | 92.23  | C | O |
| ATOM | 3848 | N   | MET | C | 183 | 81.007 | 144.450 | -69.748 | 1.00 | 58.27  | C | N |
| ATOM | 3849 | CA  | MET | C | 183 | 81.516 | 145.382 | -70.748 | 1.00 | 58.27  | C | C |
| ATOM | 3850 | CB  | MET | C | 183 | 81.145 | 146.820 | -70.381 | 1.00 | 58.27  | C | C |
| ATOM | 3851 | CG  | MET | C | 183 | 79.648 | 147.073 | -70.295 | 1.00 | 58.27  | C | C |
| ATOM | 3852 | SD  | MET | C | 183 | 79.250 | 148.784 | -69.889 | 1.00 | 58.27  | C | S |
| ATOM | 3853 | CE  | MET | C | 183 | 79.991 | 149.643 | -71.275 | 1.00 | 58.27  | C | C |
| ATOM | 3854 | C   | MET | C | 183 | 83.028 | 145.249 | -70.895 | 1.00 | 58.27  | C | C |
| ATOM | 3855 | O   | MET | C | 183 | 83.575 | 145.439 | -71.981 | 1.00 | 58.27  | C | O |
| ATOM | 3856 | N   | ALA | C | 184 | 83.697 | 144.921 | -69.794 | 1.00 | 28.36  | C | N |
| ATOM | 3857 | CA  | ALA | C | 184 | 85.142 | 144.729 | -69.806 | 1.00 | 28.36  | C | C |
| ATOM | 3858 | CB  | ALA | C | 184 | 85.673 | 144.615 | -68.386 | 1.00 | 28.36  | C | C |
| ATOM | 3859 | C   | ALA | C | 184 | 85.514 | 143.493 | -70.617 | 1.00 | 28.36  | C | C |
| ATOM | 3860 | O   | ALA | C | 184 | 86.589 | 143.429 | -71.212 | 1.00 | 28.36  | C | O |
| ATOM | 3861 | N   | LEU | C | 185 | 84.615 | 142.514 | -70.636 | 1.00 | 114.45 | C | N |
| ATOM | 3862 | CA  | LEU | C | 185 | 84.835 | 141.288 | -71.393 | 1.00 | 114.45 | C | C |
| ATOM | 3863 | CB  | LEU | C | 185 | 83.953 | 140.160 | -70.854 | 1.00 | 114.45 | C | C |
| ATOM | 3864 | CG  | LEU | C | 185 | 84.151 | 138.777 | -71.478 | 1.00 | 114.45 | C | C |
| ATOM | 3865 | CD1 | LEU | C | 185 | 85.589 | 138.310 | -71.304 | 1.00 | 114.45 | C | C |
| ATOM | 3866 | CD2 | LEU | C | 185 | 83.182 | 137.773 | -70.873 | 1.00 | 114.45 | C | C |
| ATOM | 3867 | C   | LEU | C | 185 | 84.553 | 141.515 | -72.874 | 1.00 | 114.45 | C | C |
| ATOM | 3868 | O   | LEU | C | 185 | 85.108 | 140.830 | -73.734 | 1.00 | 114.45 | C | O |
| ATOM | 3869 | N   | VAL | C | 186 | 83.688 | 142.481 | -73.166 | 1.00 | 33.25  | C | N |
| ATOM | 3870 | CA  | VAL | C | 186 | 83.357 | 142.821 | -74.544 | 1.00 | 33.25  | C | C |
| ATOM | 3871 | CB  | VAL | C | 186 | 82.214 | 143.851 | -74.613 | 1.00 | 33.25  | C | C |
| ATOM | 3872 | CG1 | VAL | C | 186 | 81.963 | 144.270 | -76.053 | 1.00 | 33.25  | C | C |
| ATOM | 3873 | CG2 | VAL | C | 186 | 80.949 | 143.282 | -73.988 | 1.00 | 33.25  | C | C |
| ATOM | 3874 | C   | VAL | C | 186 | 84.578 | 143.377 | -75.266 | 1.00 | 33.25  | C | C |
| ATOM | 3875 | O   | VAL | C | 186 | 84.889 | 142.970 | -76.385 | 1.00 | 33.25  | C | O |
| ATOM | 3876 | N   | PHE | C | 187 | 85.268 | 144.307 | -74.615 | 1.00 | 90.63  | C | N |
| ATOM | 3877 | CA  | PHE | C | 187 | 86.472 | 144.908 | -75.176 | 1.00 | 90.63  | C | C |
| ATOM | 3878 | CB  | PHE | C | 187 | 86.974 | 146.034 | -74.270 | 1.00 | 90.63  | C | C |
| ATOM | 3879 | CG  | PHE | C | 187 | 88.174 | 146.759 | -74.811 | 1.00 | 90.63  | C | C |
| ATOM | 3880 | CD1 | PHE | C | 187 | 88.021 | 147.800 | -75.712 | 1.00 | 90.63  | C | C |
| ATOM | 3881 | CD2 | PHE | C | 187 | 89.452 | 146.405 | -74.415 | 1.00 | 90.63  | C | C |
| ATOM | 3882 | CE1 | PHE | C | 187 | 89.122 | 148.471 | -76.211 | 1.00 | 90.63  | C | C |
| ATOM | 3883 | CE2 | PHE | C | 187 | 90.557 | 147.072 | -74.910 | 1.00 | 90.63  | C | C |
| ATOM | 3884 | CZ  | PHE | C | 187 | 90.391 | 148.106 | -75.809 | 1.00 | 90.63  | C | C |
| ATOM | 3885 | C   | PHE | C | 187 | 87.562 | 143.859 | -75.370 | 1.00 | 90.63  | C | C |
| ATOM | 3886 | O   | PHE | C | 187 | 88.483 | 144.045 | -76.166 | 1.00 | 90.63  | C | O |
| ATOM | 3887 | N   | TYR | C | 188 | 87.451 | 142.756 | -74.636 | 1.00 | 111.20 | C | N |
| ATOM | 3888 | CA  | TYR | C | 188 | 88.417 | 141.668 | -74.730 | 1.00 | 111.20 | C | C |
| ATOM | 3889 | CB  | TYR | C | 188 | 88.232 | 140.688 | -73.569 | 1.00 | 111.20 | C | C |
| ATOM | 3890 | CG  | TYR | C | 188 | 89.180 | 139.510 | -73.594 | 1.00 | 111.20 | C | C |
| ATOM | 3891 | CD1 | TYR | C | 188 | 90.443 | 139.597 | -73.024 | 1.00 | 111.20 | C | C |
| ATOM | 3892 | CD2 | TYR | C | 188 | 88.809 | 138.308 | -74.182 | 1.00 | 111.20 | C | C |
| ATOM | 3893 | CE1 | TYR | C | 188 | 91.311 | 138.521 | -73.043 | 1.00 | 111.20 | C | C |
| ATOM | 3894 | CE2 | TYR | C | 188 | 89.670 | 137.228 | -74.206 | 1.00 | 111.20 | C | C |
| ATOM | 3895 | CZ  | TYR | C | 188 | 90.919 | 137.339 | -73.635 | 1.00 | 111.20 | C | C |
| ATOM | 3896 | OH  | TYR | C | 188 | 91.779 | 136.266 | -73.657 | 1.00 | 111.20 | C | O |
| ATOM | 3897 | C   | TYR | C | 188 | 88.295 | 140.936 | -76.063 | 1.00 | 111.20 | C | C |
| ATOM | 3898 | O   | TYR | C | 188 | 89.297 | 140.655 | -76.720 | 1.00 | 111.20 | C | O |
| ATOM | 3899 | N   | TYR | C | 189 | 87.062 | 140.630 | -76.458 | 1.00 | 99.31  | C | N |
| ATOM | 3900 | CA  | TYR | C | 189 | 86.813 | 139.943 | -77.720 | 1.00 | 99.31  | C | C |
| ATOM | 3901 | CB  | TYR | C | 189 | 85.424 | 139.300 | -77.721 | 1.00 | 99.31  | C | C |
| ATOM | 3902 | CG  | TYR | C | 189 | 85.297 | 138.111 | -76.794 | 1.00 | 99.31  | C | C |
| ATOM | 3903 | CD1 | TYR | C | 189 | 84.859 | 138.267 | -75.486 | 1.00 | 99.31  | C | C |
| ATOM | 3904 | CD2 | TYR | C | 189 | 85.615 | 136.832 | -77.229 | 1.00 | 99.31  | C | C |
| ATOM | 3905 | CE1 | TYR | C | 189 | 84.742 | 137.182 | -74.637 | 1.00 | 99.31  | C | C |
| ATOM | 3906 | CE2 | TYR | C | 189 | 85.501 | 135.742 | -76.387 | 1.00 | 99.31  | C | C |
| ATOM | 3907 | CZ  | TYR | C | 189 | 85.064 | 135.923 | -75.093 | 1.00 | 99.31  | C | C |
| ATOM | 3908 | OH  | TYR | C | 189 | 84.949 | 134.840 | -74.252 | 1.00 | 99.31  | C | O |
| ATOM | 3909 | C   | TYR | C | 189 | 86.958 | 140.886 | -78.910 | 1.00 | 99.31  | C | C |
| ATOM | 3910 | O   | TYR | C | 189 | 87.483 | 140.503 | -79.955 | 1.00 | 99.31  | C | O |
| ATOM | 3911 | N   | VAL | C | 190 | 86.488 | 142.119 | -78.746 | 1.00 | 25.67  | C | N |
| ATOM | 3912 | CA  | VAL | C | 190 | 86.588 | 143.121 | -79.801 | 1.00 | 25.67  | C | C |
| ATOM | 3913 | CB  | VAL | C | 190 | 85.990 | 144.471 | -79.361 | 1.00 | 25.67  | C | C |
| ATOM | 3914 | CG1 | VAL | C | 190 | 86.296 | 145.548 | -80.391 | 1.00 | 25.67  | C | C |

|      |      |     |     |   |     |        |         |         |      |        |   |   |
|------|------|-----|-----|---|-----|--------|---------|---------|------|--------|---|---|
| ATOM | 3915 | CG2 | VAL | C | 190 | 84.490 | 144.342 | -79.146 | 1.00 | 25.67  | C | C |
| ATOM | 3916 | C   | VAL | C | 190 | 88.039 | 143.328 | -80.223 | 1.00 | 25.67  | C | C |
| ATOM | 3917 | O   | VAL | C | 190 | 88.356 | 143.327 | -81.412 | 1.00 | 25.67  | C | O |
| ATOM | 3918 | N   | THR | C | 191 | 88.916 | 143.502 | -79.239 | 1.00 | 113.27 | C | N |
| ATOM | 3919 | CA  | THR | C | 191 | 90.337 | 143.689 | -79.505 | 1.00 | 113.27 | C | C |
| ATOM | 3920 | CB  | THR | C | 191 | 91.128 | 143.927 | -78.205 | 1.00 | 113.27 | C | C |
| ATOM | 3921 | OG1 | THR | C | 191 | 90.649 | 145.114 | -77.561 | 1.00 | 113.27 | C | O |
| ATOM | 3922 | CG2 | THR | C | 191 | 92.611 | 144.084 | -78.505 | 1.00 | 113.27 | C | C |
| ATOM | 3923 | C   | THR | C | 191 | 90.919 | 142.480 | -80.229 | 1.00 | 113.27 | C | C |
| ATOM | 3924 | O   | THR | C | 191 | 91.588 | 142.621 | -81.252 | 1.00 | 113.27 | C | O |
| ATOM | 3925 | N   | GLY | C | 192 | 90.655 | 141.292 | -79.693 | 1.00 | 21.76  | C | N |
| ATOM | 3926 | CA  | GLY | C | 192 | 91.154 | 140.059 | -80.274 | 1.00 | 21.76  | C | C |
| ATOM | 3927 | C   | GLY | C | 192 | 90.769 | 139.890 | -81.731 | 1.00 | 21.76  | C | C |
| ATOM | 3928 | O   | GLY | C | 192 | 91.482 | 139.243 | -82.498 | 1.00 | 21.76  | C | O |
| ATOM | 3929 | N   | PHE | C | 193 | 89.637 | 140.472 | -82.113 | 1.00 | 45.84  | C | N |
| ATOM | 3930 | CA  | PHE | C | 193 | 89.166 | 140.397 | -83.491 | 1.00 | 45.84  | C | C |
| ATOM | 3931 | CB  | PHE | C | 193 | 87.698 | 140.819 | -83.584 | 1.00 | 45.84  | C | C |
| ATOM | 3932 | CG  | PHE | C | 193 | 86.751 | 139.874 | -82.900 | 1.00 | 45.84  | C | C |
| ATOM | 3933 | CD1 | PHE | C | 193 | 87.130 | 138.571 | -82.623 | 1.00 | 45.84  | C | C |
| ATOM | 3934 | CD2 | PHE | C | 193 | 85.481 | 140.288 | -82.536 | 1.00 | 45.84  | C | C |
| ATOM | 3935 | CE1 | PHE | C | 193 | 86.261 | 137.699 | -81.994 | 1.00 | 45.84  | C | C |
| ATOM | 3936 | CE2 | PHE | C | 193 | 84.607 | 139.421 | -81.907 | 1.00 | 45.84  | C | C |
| ATOM | 3937 | CZ  | PHE | C | 193 | 84.998 | 138.125 | -81.636 | 1.00 | 45.84  | C | C |
| ATOM | 3938 | C   | PHE | C | 193 | 90.023 | 141.256 | -84.416 | 1.00 | 45.84  | C | C |
| ATOM | 3939 | O   | PHE | C | 193 | 90.438 | 140.806 | -85.484 | 1.00 | 45.84  | C | O |
| ATOM | 3940 | N   | PHE | C | 194 | 90.285 | 142.491 | -84.001 | 1.00 | 127.60 | C | N |
| ATOM | 3941 | CA  | PHE | C | 194 | 91.113 | 143.401 | -84.785 | 1.00 | 127.60 | C | C |
| ATOM | 3942 | CB  | PHE | C | 194 | 91.126 | 144.798 | -84.160 | 1.00 | 127.60 | C | C |
| ATOM | 3943 | CG  | PHE | C | 194 | 89.851 | 145.567 | -84.365 | 1.00 | 127.60 | C | C |
| ATOM | 3944 | CD1 | PHE | C | 194 | 88.820 | 145.484 | -83.445 | 1.00 | 127.60 | C | C |
| ATOM | 3945 | CD2 | PHE | C | 194 | 89.686 | 146.373 | -85.479 | 1.00 | 127.60 | C | C |
| ATOM | 3946 | CE1 | PHE | C | 194 | 87.647 | 146.191 | -83.632 | 1.00 | 127.60 | C | C |
| ATOM | 3947 | CE2 | PHE | C | 194 | 88.515 | 147.082 | -85.671 | 1.00 | 127.60 | C | C |
| ATOM | 3948 | CZ  | PHE | C | 194 | 87.494 | 146.991 | -84.747 | 1.00 | 127.60 | C | C |
| ATOM | 3949 | C   | PHE | C | 194 | 92.538 | 142.875 | -84.928 | 1.00 | 127.60 | C | C |
| ATOM | 3950 | O   | PHE | C | 194 | 93.202 | 143.124 | -85.934 | 1.00 | 127.60 | C | O |
| ATOM | 3951 | N   | ILE | C | 195 | 93.002 | 142.148 | -83.917 | 1.00 | 36.34  | C | N |
| ATOM | 3952 | CA  | ILE | C | 195 | 94.337 | 141.563 | -83.947 | 1.00 | 36.34  | C | C |
| ATOM | 3953 | CB  | ILE | C | 195 | 94.731 | 140.980 | -82.578 | 1.00 | 36.34  | C | C |
| ATOM | 3954 | CG2 | ILE | C | 195 | 96.169 | 140.485 | -82.603 | 1.00 | 36.34  | C | C |
| ATOM | 3955 | CG1 | ILE | C | 195 | 94.542 | 142.025 | -81.477 | 1.00 | 36.34  | C | C |
| ATOM | 3956 | CD1 | ILE | C | 195 | 94.800 | 141.494 | -80.084 | 1.00 | 36.34  | C | C |
| ATOM | 3957 | C   | ILE | C | 195 | 94.411 | 140.458 | -84.994 | 1.00 | 36.34  | C | C |
| ATOM | 3958 | O   | ILE | C | 195 | 95.435 | 140.278 | -85.652 | 1.00 | 36.34  | C | O |
| ATOM | 3959 | N   | ALA | C | 196 | 93.315 | 139.721 | -85.142 | 1.00 | 30.78  | C | N |
| ATOM | 3960 | CA  | ALA | C | 196 | 93.245 | 138.640 | -86.117 | 1.00 | 30.78  | C | C |
| ATOM | 3961 | CB  | ALA | C | 196 | 92.093 | 137.704 | -85.787 | 1.00 | 30.78  | C | C |
| ATOM | 3962 | C   | ALA | C | 196 | 93.098 | 139.189 | -87.532 | 1.00 | 30.78  | C | C |
| ATOM | 3963 | O   | ALA | C | 196 | 93.787 | 138.749 | -88.453 | 1.00 | 30.78  | C | O |
| ATOM | 3964 | N   | VAL | C | 197 | 92.199 | 140.154 | -87.696 | 1.00 | 86.02  | C | N |
| ATOM | 3965 | CA  | VAL | C | 197 | 91.957 | 140.767 | -88.997 | 1.00 | 86.02  | C | C |
| ATOM | 3966 | CB  | VAL | C | 197 | 90.816 | 141.802 | -88.931 | 1.00 | 86.02  | C | C |
| ATOM | 3967 | CG1 | VAL | C | 197 | 90.649 | 142.496 | -90.274 | 1.00 | 86.02  | C | C |
| ATOM | 3968 | CG2 | VAL | C | 197 | 89.518 | 141.134 | -88.505 | 1.00 | 86.02  | C | C |
| ATOM | 3969 | C   | VAL | C | 197 | 93.215 | 141.438 | -89.538 | 1.00 | 86.02  | C | C |
| ATOM | 3970 | O   | VAL | C | 197 | 93.504 | 141.367 | -90.732 | 1.00 | 86.02  | C | O |
| ATOM | 3971 | N   | SER | C | 198 | 93.963 | 142.087 | -88.651 | 1.00 | 41.44  | C | N |
| ATOM | 3972 | CA  | SER | C | 198 | 95.192 | 142.768 | -89.040 | 1.00 | 41.44  | C | C |
| ATOM | 3973 | CB  | SER | C | 198 | 95.767 | 143.556 | -87.860 | 1.00 | 41.44  | C | C |
| ATOM | 3974 | OG  | SER | C | 198 | 96.088 | 142.697 | -86.780 | 1.00 | 41.44  | C | O |
| ATOM | 3975 | C   | SER | C | 198 | 96.229 | 141.782 | -89.571 | 1.00 | 41.44  | C | C |
| ATOM | 3976 | O   | SER | C | 198 | 97.050 | 142.129 | -90.419 | 1.00 | 41.44  | C | O |
| ATOM | 3977 | N   | VAL | C | 199 | 96.184 | 140.553 | -89.066 | 1.00 | 108.02 | C | N |
| ATOM | 3978 | CA  | VAL | C | 199 | 97.106 | 139.510 | -89.502 | 1.00 | 108.02 | C | C |
| ATOM | 3979 | CB  | VAL | C | 199 | 97.274 | 138.416 | -88.430 | 1.00 | 108.02 | C | C |
| ATOM | 3980 | CG1 | VAL | C | 199 | 98.138 | 137.281 | -88.960 | 1.00 | 108.02 | C | C |
| ATOM | 3981 | CG2 | VAL | C | 199 | 97.874 | 139.002 | -87.162 | 1.00 | 108.02 | C | C |
| ATOM | 3982 | C   | VAL | C | 199 | 96.635 | 138.869 | -90.804 | 1.00 | 108.02 | C | C |

|      |      |     |     |   |     |         |         |          |      |        |   |   |
|------|------|-----|-----|---|-----|---------|---------|----------|------|--------|---|---|
| ATOM | 3983 | O   | VAL | C | 199 | 97.426  | 138.657 | -91.724  | 1.00 | 108.02 | C | O |
| ATOM | 3984 | N   | ILE | C | 200 | 95.344  | 138.563 | -90.876  | 1.00 | 89.21  | C | N |
| ATOM | 3985 | CA  | ILE | C | 200 | 94.764  | 137.963 | -92.072  | 1.00 | 89.21  | C | C |
| ATOM | 3986 | CB  | ILE | C | 200 | 93.277  | 137.617 | -91.869  | 1.00 | 89.21  | C | C |
| ATOM | 3987 | CG2 | ILE | C | 200 | 92.686  | 137.037 | -93.144  | 1.00 | 89.21  | C | C |
| ATOM | 3988 | CG1 | ILE | C | 200 | 93.111  | 136.635 | -90.708  | 1.00 | 89.21  | C | C |
| ATOM | 3989 | CD1 | ILE | C | 200 | 93.835  | 135.323 | -90.911  | 1.00 | 89.21  | C | C |
| ATOM | 3990 | C   | ILE | C | 200 | 94.904  | 138.892 | -93.273  | 1.00 | 89.21  | C | C |
| ATOM | 3991 | O   | ILE | C | 200 | 95.343  | 138.475 | -94.344  | 1.00 | 89.21  | C | O |
| ATOM | 3992 | N   | ALA | C | 201 | 94.529  | 140.153 | -93.085  | 1.00 | 33.80  | C | N |
| ATOM | 3993 | CA  | ALA | C | 201 | 94.636  | 141.149 | -94.145  | 1.00 | 33.80  | C | C |
| ATOM | 3994 | CB  | ALA | C | 201 | 94.045  | 142.474 | -93.691  | 1.00 | 33.80  | C | C |
| ATOM | 3995 | C   | ALA | C | 201 | 96.087  | 141.330 | -94.574  | 1.00 | 33.80  | C | C |
| ATOM | 3996 | O   | ALA | C | 201 | 96.373  | 141.543 | -95.752  | 1.00 | 33.80  | C | O |
| ATOM | 3997 | N   | ASN | C | 202 | 96.999  | 141.242 | -93.611  | 1.00 | 47.57  | C | N |
| ATOM | 3998 | CA  | ASN | C | 202 | 98.424  | 141.358 | -93.890  | 1.00 | 47.57  | C | C |
| ATOM | 3999 | CB  | ASN | C | 202 | 99.235  | 141.196 | -92.602  | 1.00 | 47.57  | C | C |
| ATOM | 4000 | CG  | ASN | C | 202 | 100.701 | 141.547 | -92.783  | 1.00 | 47.57  | C | C |
| ATOM | 4001 | OD1 | ASN | C | 202 | 101.267 | 141.375 | -93.863  | 1.00 | 47.57  | C | O |
| ATOM | 4002 | ND2 | ASN | C | 202 | 101.324 | 142.043 | -91.720  | 1.00 | 47.57  | C | N |
| ATOM | 4003 | C   | ASN | C | 202 | 98.863  | 140.329 | -94.926  | 1.00 | 47.57  | C | C |
| ATOM | 4004 | O   | ASN | C | 202 | 99.632  | 140.636 | -95.836  | 1.00 | 47.57  | C | O |
| ATOM | 4005 | N   | VAL | C | 203 | 98.363  | 139.106 | -94.781  | 1.00 | 47.39  | C | N |
| ATOM | 4006 | CA  | VAL | C | 203 | 98.678  | 138.032 | -95.714  | 1.00 | 47.39  | C | C |
| ATOM | 4007 | CB  | VAL | C | 203 | 98.168  | 136.672 | -95.198  | 1.00 | 47.39  | C | C |
| ATOM | 4008 | CG1 | VAL | C | 203 | 98.507  | 135.567 | -96.187  | 1.00 | 47.39  | C | C |
| ATOM | 4009 | CG2 | VAL | C | 203 | 98.759  | 136.370 | -93.829  | 1.00 | 47.39  | C | C |
| ATOM | 4010 | C   | VAL | C | 203 | 98.071  | 138.308 | -97.086  | 1.00 | 47.39  | C | C |
| ATOM | 4011 | O   | VAL | C | 203 | 98.677  | 138.010 | -98.116  | 1.00 | 47.39  | C | O |
| ATOM | 4012 | N   | VAL | C | 204 | 96.873  | 138.885 | -97.093  | 1.00 | 117.92 | C | N |
| ATOM | 4013 | CA  | VAL | C | 204 | 96.180  | 139.201 | -98.336  | 1.00 | 117.92 | C | C |
| ATOM | 4014 | CB  | VAL | C | 204 | 94.725  | 139.638 | -98.077  | 1.00 | 117.92 | C | C |
| ATOM | 4015 | CG1 | VAL | C | 204 | 93.994  | 139.862 | -99.392  | 1.00 | 117.92 | C | C |
| ATOM | 4016 | CG2 | VAL | C | 204 | 94.003  | 138.598 | -97.237  | 1.00 | 117.92 | C | C |
| ATOM | 4017 | C   | VAL | C | 204 | 96.909  | 140.300 | -99.105  | 1.00 | 117.92 | C | C |
| ATOM | 4018 | O   | VAL | C | 204 | 96.837  | 140.365 | -100.332 | 1.00 | 117.92 | C | O |
| ATOM | 4019 | N   | GLU | C | 205 | 97.613  | 141.160 | -98.377  | 1.00 | 86.49  | C | N |
| ATOM | 4020 | CA  | GLU | C | 205 | 98.375  | 142.238 | -98.997  | 1.00 | 86.49  | C | C |
| ATOM | 4021 | CB  | GLU | C | 205 | 98.900  | 143.206 | -97.934  | 1.00 | 86.49  | C | C |
| ATOM | 4022 | CG  | GLU | C | 205 | 97.814  | 143.916 | -97.143  | 1.00 | 86.49  | C | C |
| ATOM | 4023 | CD  | GLU | C | 205 | 98.380  | 144.856 | -96.097  | 1.00 | 86.49  | C | C |
| ATOM | 4024 | OE1 | GLU | C | 205 | 99.621  | 144.950 | -95.992  | 1.00 | 86.49  | C | O |
| ATOM | 4025 | OE2 | GLU | C | 205 | 97.585  | 145.499 | -95.380  | 1.00 | 86.49  | C | O |
| ATOM | 4026 | C   | GLU | C | 205 | 99.537  | 141.684 | -99.816  | 1.00 | 86.49  | C | C |
| ATOM | 4027 | O   | GLU | C | 205 | 100.046 | 142.350 | -100.716 | 1.00 | 86.49  | C | O |
| ATOM | 4028 | N   | THR | C | 206 | 99.948  | 140.461 | -99.497  | 1.00 | 119.91 | C | N |
| ATOM | 4029 | CA  | THR | C | 206 | 101.067 | 139.825 | -100.182 | 1.00 | 119.91 | C | C |
| ATOM | 4030 | CB  | THR | C | 206 | 101.757 | 138.783 | -99.281  | 1.00 | 119.91 | C | C |
| ATOM | 4031 | OG1 | THR | C | 206 | 102.056 | 139.371 | -98.009  | 1.00 | 119.91 | C | O |
| ATOM | 4032 | CG2 | THR | C | 206 | 103.045 | 138.287 | -99.922  | 1.00 | 119.91 | C | C |
| ATOM | 4033 | C   | THR | C | 206 | 100.613 | 139.154 | -101.476 | 1.00 | 119.91 | C | C |
| ATOM | 4034 | O   | THR | C | 206 | 101.425 | 138.875 | -102.358 | 1.00 | 119.91 | C | O |
| ATOM | 4035 | N   | VAL | C | 207 | 99.312  | 138.899 | -101.581 | 1.00 | 81.16  | C | N |
| ATOM | 4036 | CA  | VAL | C | 207 | 98.739  | 138.289 | -102.777 | 1.00 | 81.16  | C | C |
| ATOM | 4037 | CB  | VAL | C | 207 | 97.199  | 138.370 | -102.767 | 1.00 | 81.16  | C | C |
| ATOM | 4038 | CG1 | VAL | C | 207 | 96.629  | 137.931 | -104.107 | 1.00 | 81.16  | C | C |
| ATOM | 4039 | CG2 | VAL | C | 207 | 96.630  | 137.528 | -101.634 | 1.00 | 81.16  | C | C |
| ATOM | 4040 | C   | VAL | C | 207 | 99.274  | 138.956 | -104.040 | 1.00 | 81.16  | C | C |
| ATOM | 4041 | O   | VAL | C | 207 | 99.282  | 140.182 | -104.141 | 1.00 | 81.16  | C | O |
| ATOM | 4042 | N   | PRO | C | 208 | 99.731  | 138.143 | -105.006 | 1.00 | 163.31 | C | N |
| ATOM | 4043 | CA  | PRO | C | 208 | 100.310 | 138.615 | -106.269 | 1.00 | 163.31 | C | C |
| ATOM | 4044 | CD  | PRO | C | 208 | 99.716  | 136.671 | -104.927 | 1.00 | 163.31 | C | C |
| ATOM | 4045 | CB  | PRO | C | 208 | 100.297 | 137.358 | -107.139 | 1.00 | 163.31 | C | C |
| ATOM | 4046 | CG  | PRO | C | 208 | 100.461 | 136.248 | -106.166 | 1.00 | 163.31 | C | C |
| ATOM | 4047 | C   | PRO | C | 208 | 99.484  | 139.718 | -106.926 | 1.00 | 163.31 | C | C |
| ATOM | 4048 | O   | PRO | C | 208 | 98.531  | 139.430 | -107.650 | 1.00 | 163.31 | C | O |
| ATOM | 4049 | N   | CYS | C | 209 | 99.860  | 140.968 | -106.671 | 1.00 | 122.13 | C | N |
| ATOM | 4050 | CA  | CYS | C | 209 | 99.187  | 142.119 | -107.262 | 1.00 | 122.13 | C | C |

|      |      |     |     |   |     |         |                 |            |   |   |
|------|------|-----|-----|---|-----|---------|-----------------|------------|---|---|
| ATOM | 4051 | CB  | CYS | C | 209 | 97.745  | 142.222-106.761 | 1.00122.13 | C | C |
| ATOM | 4052 | SG  | CYS | C | 209 | 97.588  | 142.543-104.989 | 1.00122.13 | C | S |
| ATOM | 4053 | C   | CYS | C | 209 | 99.944  | 143.404-106.941 | 1.00122.13 | C | C |
| ATOM | 4054 | O   | CYS | C | 209 | 101.119 | 143.367-106.576 | 1.00122.13 | C | O |
| ATOM | 4055 | N   | GLY | C | 210 | 99.265  | 144.538-107.079 | 1.00296.88 | C | N |
| ATOM | 4056 | CA  | GLY | C | 210 | 99.865  | 145.827-106.784 | 1.00296.88 | C | C |
| ATOM | 4057 | C   | GLY | C | 210 | 100.674 | 146.384-107.939 | 1.00296.88 | C | C |
| ATOM | 4058 | O   | GLY | C | 210 | 100.663 | 145.835-109.041 | 1.00296.88 | C | O |
| ATOM | 4059 | N   | SER | C | 211 | 101.379 | 147.481-107.684 | 1.00230.38 | C | N |
| ATOM | 4060 | CA  | SER | C | 211 | 102.201 | 148.121-108.705 | 1.00230.38 | C | C |
| ATOM | 4061 | CB  | SER | C | 211 | 101.757 | 149.570-108.916 | 1.00230.38 | C | C |
| ATOM | 4062 | OG  | SER | C | 211 | 100.408 | 149.632-109.348 | 1.00230.38 | C | O |
| ATOM | 4063 | C   | SER | C | 211 | 103.680 | 148.075-108.333 | 1.00230.38 | C | C |
| ATOM | 4064 | O   | SER | C | 211 | 104.262 | 146.999-108.193 | 1.00230.38 | C | O |
| ATOM | 4065 | N   | SER | C | 212 | 104.281 | 149.250-108.175 | 1.00146.29 | C | N |
| ATOM | 4066 | CA  | SER | C | 212 | 105.693 | 149.348-107.817 | 1.00146.29 | C | C |
| ATOM | 4067 | CB  | SER | C | 212 | 106.500 | 149.987-108.954 | 1.00146.29 | C | C |
| ATOM | 4068 | OG  | SER | C | 212 | 106.427 | 149.207-110.135 | 1.00146.29 | C | O |
| ATOM | 4069 | C   | SER | C | 212 | 105.917 | 150.106-106.505 | 1.00146.29 | C | C |
| ATOM | 4070 | O   | SER | C | 212 | 106.586 | 149.598-105.605 | 1.00146.29 | C | O |
| ATOM | 4071 | N   | PRO | C | 213 | 105.358 | 151.323-106.390 | 1.00129.39 | C | N |
| ATOM | 4072 | CA  | PRO | C | 213 | 105.558 | 152.113-105.172 | 1.00129.39 | C | C |
| ATOM | 4073 | CD  | PRO | C | 213 | 104.530 | 152.046-107.366 | 1.00129.39 | C | C |
| ATOM | 4074 | CB  | PRO | C | 213 | 105.146 | 153.532-105.595 | 1.00129.39 | C | C |
| ATOM | 4075 | CG  | PRO | C | 213 | 104.878 | 153.465-107.082 | 1.00129.39 | C | C |
| ATOM | 4076 | C   | PRO | C | 213 | 104.649 | 151.638-104.047 | 1.00129.39 | C | C |
| ATOM | 4077 | O   | PRO | C | 213 | 104.881 | 151.968-102.885 | 1.00129.39 | C | O |
| ATOM | 4078 | N   | GLY | C | 214 | 103.618 | 150.880-104.402 | 1.00105.51 | C | N |
| ATOM | 4079 | CA  | GLY | C | 214 | 102.672 | 150.374-103.427 | 1.00105.51 | C | C |
| ATOM | 4080 | C   | GLY | C | 214 | 102.855 | 148.893-103.165 | 1.00105.51 | C | C |
| ATOM | 4081 | O   | GLY | C | 214 | 102.120 | 148.294-102.380 | 1.00105.51 | C | O |
| ATOM | 4082 | N   | HIS | C | 215 | 103.843 | 148.299-103.827 | 1.00142.23 | C | N |
| ATOM | 4083 | CA  | HIS | C | 215 | 104.127 | 146.879-103.669 | 1.00142.23 | C | C |
| ATOM | 4084 | ND1 | HIS | C | 215 | 104.123 | 143.887-104.619 | 1.00142.23 | C | N |
| ATOM | 4085 | CG  | HIS | C | 215 | 105.074 | 144.854-104.863 | 1.00142.23 | C | C |
| ATOM | 4086 | CB  | HIS | C | 215 | 104.742 | 146.310-104.949 | 1.00142.23 | C | C |
| ATOM | 4087 | NE2 | HIS | C | 215 | 105.994 | 142.861-104.817 | 1.00142.23 | C | N |
| ATOM | 4088 | CD2 | HIS | C | 215 | 106.253 | 144.199-104.986 | 1.00142.23 | C | C |
| ATOM | 4089 | CE1 | HIS | C | 215 | 104.701 | 142.699-104.597 | 1.00142.23 | C | C |
| ATOM | 4090 | C   | HIS | C | 215 | 105.056 | 146.627-102.485 | 1.00142.23 | C | C |
| ATOM | 4091 | O   | HIS | C | 215 | 104.935 | 145.615-101.794 | 1.00142.23 | C | O |
| ATOM | 4092 | N   | ILE | C | 216 | 105.982 | 147.552-102.258 | 1.00 67.89 | C | N |
| ATOM | 4093 | CA  | ILE | C | 216 | 106.931 | 147.431-101.158 | 1.00 67.89 | C | C |
| ATOM | 4094 | CB  | ILE | C | 216 | 108.062 | 148.471-101.269 | 1.00 67.89 | C | C |
| ATOM | 4095 | CG2 | ILE | C | 216 | 109.073 | 148.278-100.150 | 1.00 67.89 | C | C |
| ATOM | 4096 | CG1 | ILE | C | 216 | 108.743 | 148.376-102.636 | 1.00 67.89 | C | C |
| ATOM | 4097 | CD1 | ILE | C | 216 | 109.877 | 149.359-102.823 | 1.00 67.89 | C | C |
| ATOM | 4098 | C   | ILE | C | 216 | 106.231 | 147.600 -99.814 | 1.00 67.89 | C | C |
| ATOM | 4099 | O   | ILE | C | 216 | 106.391 | 146.778 -98.912 | 1.00 67.89 | C | O |
| ATOM | 4100 | N   | LYS | C | 217 | 105.454 | 148.671 -99.688 | 1.00172.29 | C | N |
| ATOM | 4101 | CA  | LYS | C | 217 | 104.709 | 148.936 -98.464 | 1.00172.29 | C | C |
| ATOM | 4102 | CB  | LYS | C | 217 | 104.356 | 150.422 -98.363 | 1.00172.29 | C | C |
| ATOM | 4103 | CG  | LYS | C | 217 | 103.767 | 150.837 -97.023 | 1.00172.29 | C | C |
| ATOM | 4104 | CD  | LYS | C | 217 | 104.736 | 150.564 -95.885 | 1.00172.29 | C | C |
| ATOM | 4105 | CE  | LYS | C | 217 | 104.145 | 150.972 -94.544 | 1.00172.29 | C | C |
| ATOM | 4106 | NZ  | LYS | C | 217 | 105.081 | 150.707 -93.417 | 1.00172.29 | C | N |
| ATOM | 4107 | C   | LYS | C | 217 | 103.444 | 148.085 -98.419 | 1.00172.29 | C | C |
| ATOM | 4108 | O   | LYS | C | 217 | 102.700 | 148.109 -97.439 | 1.00172.29 | C | O |
| ATOM | 4109 | N   | GLU | C | 218 | 103.210 | 147.335 -99.493 | 1.00302.48 | C | N |
| ATOM | 4110 | CA  | GLU | C | 218 | 102.057 | 146.445 -99.590 | 1.00302.48 | C | C |
| ATOM | 4111 | CB  | GLU | C | 218 | 102.028 | 145.464 -98.415 | 1.00302.48 | C | C |
| ATOM | 4112 | CG  | GLU | C | 218 | 103.279 | 144.609 -98.287 | 1.00302.48 | C | C |
| ATOM | 4113 | CD  | GLU | C | 218 | 103.474 | 143.674 -99.465 | 1.00302.48 | C | C |
| ATOM | 4114 | OE1 | GLU | C | 218 | 102.532 | 143.522-100.271 | 1.00302.48 | C | O |
| ATOM | 4115 | OE2 | GLU | C | 218 | 104.571 | 143.089 -99.586 | 1.00302.48 | C | O |
| ATOM | 4116 | C   | GLU | C | 218 | 100.740 | 147.212 -99.673 | 1.00302.48 | C | C |
| ATOM | 4117 | O   | GLU | C | 218 | 99.668  | 146.613 -99.765 | 1.00302.48 | C | O |
| ATOM | 4118 | N   | LEU | C | 219 | 100.826 | 148.538 -99.641 | 1.00167.09 | C | N |



|      |      |     |     |   |     |         |         |          |            |   |   |
|------|------|-----|-----|---|-----|---------|---------|----------|------------|---|---|
| ATOM | 4119 | CA  | LEU | C | 219 | 99.643  | 149.386 | -99.735  | 1.00167.09 | C | C |
| ATOM | 4120 | CB  | LEU | C | 219 | 98.794  | 149.280 | -98.461  | 1.00167.09 | C | C |
| ATOM | 4121 | CG  | LEU | C | 219 | 99.500  | 149.276 | -97.101  | 1.00167.09 | C | C |
| ATOM | 4122 | CD1 | LEU | C | 219 | 99.926  | 150.676 | -96.690  | 1.00167.09 | C | C |
| ATOM | 4123 | CD2 | LEU | C | 219 | 98.591  | 148.673 | -96.043  | 1.00167.09 | C | C |
| ATOM | 4124 | C   | LEU | C | 219 | 100.002 | 150.840 | -100.037 | 1.00167.09 | C | C |
| ATOM | 4125 | O   | LEU | C | 219 | 100.787 | 151.456 | -99.317  | 1.00167.09 | C | O |
| ATOM | 4126 | N   | PRO | C | 220 | 99.435  | 151.385 | -101.123 | 1.00155.58 | C | N |
| ATOM | 4127 | CA  | PRO | C | 220 | 99.661  | 152.776 | -101.529 | 1.00155.58 | C | C |
| ATOM | 4128 | CD  | PRO | C | 220 | 98.613  | 150.652 | -102.100 | 1.00155.58 | C | C |
| ATOM | 4129 | CB  | PRO | C | 220 | 98.868  | 152.890 | -102.836 | 1.00155.58 | C | C |
| ATOM | 4130 | CG  | PRO | C | 220 | 98.740  | 151.489 | -103.332 | 1.00155.58 | C | C |
| ATOM | 4131 | C   | PRO | C | 220 | 99.114  | 153.760 | -100.501 | 1.00155.58 | C | C |
| ATOM | 4132 | O   | PRO | C | 220 | 97.901  | 153.950 | -100.414 | 1.00155.58 | C | O |
| ATOM | 4133 | N   | CYS | C | 221 | 100.005 | 154.378 | -99.731  | 1.00 60.66 | C | N |
| ATOM | 4134 | CA  | CYS | C | 221 | 99.598  | 155.337 | -98.711  | 1.00 60.66 | C | C |
| ATOM | 4135 | CB  | CYS | C | 221 | 100.765 | 155.649 | -97.773  | 1.00 60.66 | C | C |
| ATOM | 4136 | SG  | CYS | C | 221 | 101.421 | 154.210 | -96.897  | 1.00 60.66 | C | S |
| ATOM | 4137 | C   | CYS | C | 221 | 99.071  | 156.621 | -99.343  | 1.00 60.66 | C | C |
| ATOM | 4138 | O   | CYS | C | 221 | 99.756  | 157.254 | -100.148 | 1.00 60.66 | C | O |
| ATOM | 4139 | N   | GLY | C | 222 | 97.852  | 157.000 | -98.975  | 1.00 31.84 | C | N |
| ATOM | 4140 | CA  | GLY | C | 222 | 97.233  | 158.200 | -99.508  | 1.00 31.84 | C | C |
| ATOM | 4141 | C   | GLY | C | 222 | 96.000  | 158.616 | -98.731  | 1.00 31.84 | C | C |
| ATOM | 4142 | O   | GLY | C | 222 | 95.456  | 157.841 | -97.945  | 1.00 31.84 | C | O |
| ATOM | 4143 | N   | GLU | C | 223 | 95.559  | 159.850 | -98.954  | 1.00109.66 | C | N |
| ATOM | 4144 | CA  | GLU | C | 223 | 94.378  | 160.379 | -98.282  | 1.00109.66 | C | C |
| ATOM | 4145 | CB  | GLU | C | 223 | 94.456  | 161.906 | -98.193  | 1.00109.66 | C | C |
| ATOM | 4146 | CG  | GLU | C | 223 | 93.314  | 162.560 | -97.426  | 1.00109.66 | C | C |
| ATOM | 4147 | CD  | GLU | C | 223 | 92.073  | 162.764 | -98.276  | 1.00109.66 | C | C |
| ATOM | 4148 | OE1 | GLU | C | 223 | 92.171  | 162.645 | -99.515  | 1.00109.66 | C | O |
| ATOM | 4149 | OE2 | GLU | C | 223 | 90.998  | 163.043 | -97.704  | 1.00109.66 | C | O |
| ATOM | 4150 | C   | GLU | C | 223 | 93.107  | 159.946 | -99.006  | 1.00109.66 | C | C |
| ATOM | 4151 | O   | GLU | C | 223 | 92.030  | 159.889 | -98.412  | 1.00109.66 | C | O |
| ATOM | 4152 | N   | ARG | C | 224 | 93.243  | 159.637 | -100.292 | 1.00102.89 | C | N |
| ATOM | 4153 | CA  | ARG | C | 224 | 92.109  | 159.221 | -101.111 | 1.00102.89 | C | C |
| ATOM | 4154 | CB  | ARG | C | 224 | 92.567  | 158.904 | -102.536 | 1.00102.89 | C | C |
| ATOM | 4155 | CG  | ARG | C | 224 | 93.205  | 160.078 | -103.262 | 1.00102.89 | C | C |
| ATOM | 4156 | CD  | ARG | C | 224 | 93.656  | 159.683 | -104.659 | 1.00102.89 | C | C |
| ATOM | 4157 | NE  | ARG | C | 224 | 94.302  | 160.791 | -105.357 | 1.00102.89 | C | N |
| ATOM | 4158 | CZ  | ARG | C | 224 | 94.792  | 160.712 | -106.590 | 1.00102.89 | C | C |
| ATOM | 4159 | NH1 | ARG | C | 224 | 94.711  | 159.575 | -107.267 | 1.00102.89 | C | N |
| ATOM | 4160 | NH2 | ARG | C | 224 | 95.364  | 161.771 | -107.147 | 1.00102.89 | C | N |
| ATOM | 4161 | C   | ARG | C | 224 | 91.389  | 158.014 | -100.516 | 1.00102.89 | C | C |
| ATOM | 4162 | O   | ARG | C | 224 | 90.187  | 157.839 | -100.717 | 1.00102.89 | C | O |
| ATOM | 4163 | N   | TYR | C | 225 | 92.130  | 157.185 | -99.788  | 1.00235.34 | C | N |
| ATOM | 4164 | CA  | TYR | C | 225 | 91.568  | 155.990 | -99.168  | 1.00235.34 | C | C |
| ATOM | 4165 | CB  | TYR | C | 225 | 90.565  | 156.369 | -98.076  | 1.00235.34 | C | C |
| ATOM | 4166 | CG  | TYR | C | 225 | 91.161  | 157.176 | -96.945  | 1.00235.34 | C | C |
| ATOM | 4167 | CD1 | TYR | C | 225 | 92.517  | 157.108 | -96.656  | 1.00235.34 | C | C |
| ATOM | 4168 | CD2 | TYR | C | 225 | 90.367  | 158.007 | -96.166  | 1.00235.34 | C | C |
| ATOM | 4169 | CE1 | TYR | C | 225 | 93.066  | 157.844 | -95.624  | 1.00235.34 | C | C |
| ATOM | 4170 | CE2 | TYR | C | 225 | 90.906  | 158.747 | -95.132  | 1.00235.34 | C | C |
| ATOM | 4171 | CZ  | TYR | C | 225 | 92.255  | 158.662 | -94.865  | 1.00235.34 | C | C |
| ATOM | 4172 | OH  | TYR | C | 225 | 92.797  | 159.397 | -93.835  | 1.00235.34 | C | O |
| ATOM | 4173 | C   | TYR | C | 225 | 90.901  | 155.086 | -100.199 | 1.00235.34 | C | C |
| ATOM | 4174 | O   | TYR | C | 225 | 89.835  | 154.524 | -99.948  | 1.00235.34 | C | O |
| ATOM | 4175 | N   | ALA | C | 226 | 91.535  | 154.949 | -101.359 | 1.00 79.48 | C | N |
| ATOM | 4176 | CA  | ALA | C | 226 | 91.002  | 154.113 | -102.429 | 1.00 79.48 | C | C |
| ATOM | 4177 | CB  | ALA | C | 226 | 91.589  | 154.527 | -103.770 | 1.00 79.48 | C | C |
| ATOM | 4178 | C   | ALA | C | 226 | 91.272  | 152.636 | -102.160 | 1.00 79.48 | C | C |
| ATOM | 4179 | O   | ALA | C | 226 | 90.367  | 151.806 | -102.240 | 1.00 79.48 | C | O |
| ATOM | 4180 | N   | VAL | C | 227 | 92.522  | 152.315 | -101.842 | 1.00226.17 | C | N |
| ATOM | 4181 | CA  | VAL | C | 227 | 92.908  | 150.939 | -101.555 | 1.00226.17 | C | C |
| ATOM | 4182 | CB  | VAL | C | 227 | 94.437  | 150.797 | -101.431 | 1.00226.17 | C | C |
| ATOM | 4183 | CG1 | VAL | C | 227 | 94.810  | 149.364 | -101.083 | 1.00226.17 | C | C |
| ATOM | 4184 | CG2 | VAL | C | 227 | 95.115  | 151.232 | -102.720 | 1.00226.17 | C | C |
| ATOM | 4185 | C   | VAL | C | 227 | 92.250  | 150.442 | -100.272 | 1.00226.17 | C | C |
| ATOM | 4186 | O   | VAL | C | 227 | 92.403  | 151.045 | -99.210  | 1.00226.17 | C | O |

|      |      |     |     |   |     |        |         |          |      |        |   |   |
|------|------|-----|-----|---|-----|--------|---------|----------|------|--------|---|---|
| ATOM | 4187 | N   | ALA | C | 228 | 91.514 | 149.340 | -100.379 | 1.00 | 52.15  | C | N |
| ATOM | 4188 | CA  | ALA | C | 228 | 90.824 | 148.764 | -99.230  | 1.00 | 52.15  | C | C |
| ATOM | 4189 | CB  | ALA | C | 228 | 89.896 | 147.645 | -99.676  | 1.00 | 52.15  | C | C |
| ATOM | 4190 | C   | ALA | C | 228 | 91.814 | 148.252 | -98.189  | 1.00 | 52.15  | C | C |
| ATOM | 4191 | O   | ALA | C | 228 | 91.529 | 148.261 | -96.992  | 1.00 | 52.15  | C | O |
| ATOM | 4192 | N   | PHE | C | 229 | 92.975 | 147.804 | -98.655  | 1.00 | 68.64  | C | N |
| ATOM | 4193 | CA  | PHE | C | 229 | 94.013 | 147.296 | -97.766  | 1.00 | 68.64  | C | C |
| ATOM | 4194 | CB  | PHE | C | 229 | 95.178 | 146.725 | -98.576  | 1.00 | 68.64  | C | C |
| ATOM | 4195 | CG  | PHE | C | 229 | 94.790 | 145.591 | -99.480  | 1.00 | 68.64  | C | C |
| ATOM | 4196 | CD1 | PHE | C | 229 | 94.834 | 144.283 | -99.029  | 1.00 | 68.64  | C | C |
| ATOM | 4197 | CD2 | PHE | C | 229 | 94.382 | 145.833 | -100.782 | 1.00 | 68.64  | C | C |
| ATOM | 4198 | CE1 | PHE | C | 229 | 94.478 | 143.237 | -99.858  | 1.00 | 68.64  | C | C |
| ATOM | 4199 | CE2 | PHE | C | 229 | 94.025 | 144.791 | -101.616 | 1.00 | 68.64  | C | C |
| ATOM | 4200 | CZ  | PHE | C | 229 | 94.073 | 143.491 | -101.153 | 1.00 | 68.64  | C | C |
| ATOM | 4201 | C   | PHE | C | 229 | 94.514 | 148.388 | -96.828  | 1.00 | 68.64  | C | C |
| ATOM | 4202 | O   | PHE | C | 229 | 94.820 | 148.128 | -95.664  | 1.00 | 68.64  | C | O |
| ATOM | 4203 | N   | PHE | C | 230 | 94.595 | 149.610 | -97.342  | 1.00 | 73.77  | C | N |
| ATOM | 4204 | CA  | PHE | C | 230 | 95.051 | 150.745 | -96.550  | 1.00 | 73.77  | C | C |
| ATOM | 4205 | CB  | PHE | C | 230 | 95.400 | 151.927 | -97.456  | 1.00 | 73.77  | C | C |
| ATOM | 4206 | CG  | PHE | C | 230 | 95.932 | 153.122 | -96.716  | 1.00 | 73.77  | C | C |
| ATOM | 4207 | CD1 | PHE | C | 230 | 97.280 | 153.222 | -96.415  | 1.00 | 73.77  | C | C |
| ATOM | 4208 | CD2 | PHE | C | 230 | 95.085 | 154.146 | -96.326  | 1.00 | 73.77  | C | C |
| ATOM | 4209 | CE1 | PHE | C | 230 | 97.773 | 154.320 | -95.736  | 1.00 | 73.77  | C | C |
| ATOM | 4210 | CE2 | PHE | C | 230 | 95.572 | 155.246 | -95.647  | 1.00 | 73.77  | C | C |
| ATOM | 4211 | CZ  | PHE | C | 230 | 96.917 | 155.333 | -95.352  | 1.00 | 73.77  | C | C |
| ATOM | 4212 | C   | PHE | C | 230 | 93.995 | 151.158 | -95.531  | 1.00 | 73.77  | C | C |
| ATOM | 4213 | O   | PHE | C | 230 | 94.320 | 151.594 | -94.428  | 1.00 | 73.77  | C | O |
| ATOM | 4214 | N   | CYS | C | 231 | 92.729 | 151.018 | -95.911  | 1.00 | 36.96  | C | N |
| ATOM | 4215 | CA  | CYS | C | 231 | 91.622 | 151.364 | -95.029  | 1.00 | 36.96  | C | C |
| ATOM | 4216 | CB  | CYS | C | 231 | 90.301 | 151.361 | -95.801  | 1.00 | 36.96  | C | C |
| ATOM | 4217 | SG  | CYS | C | 231 | 90.229 | 152.552 | -97.160  | 1.00 | 36.96  | C | S |
| ATOM | 4218 | C   | CYS | C | 231 | 91.542 | 150.400 | -93.851  | 1.00 | 36.96  | C | C |
| ATOM | 4219 | O   | CYS | C | 231 | 91.294 | 150.810 | -92.717  | 1.00 | 36.96  | C | O |
| ATOM | 4220 | N   | LEU | C | 232 | 91.755 | 149.117 | -94.127  | 1.00 | 104.38 | C | N |
| ATOM | 4221 | CA  | LEU | C | 232 | 91.727 | 148.096 | -93.088  | 1.00 | 104.38 | C | C |
| ATOM | 4222 | CB  | LEU | C | 232 | 91.697 | 146.698 | -93.708  | 1.00 | 104.38 | C | C |
| ATOM | 4223 | CG  | LEU | C | 232 | 90.490 | 146.370 | -94.590  | 1.00 | 104.38 | C | C |
| ATOM | 4224 | CD1 | LEU | C | 232 | 90.627 | 144.980 | -95.194  | 1.00 | 104.38 | C | C |
| ATOM | 4225 | CD2 | LEU | C | 232 | 89.197 | 146.489 | -93.797  | 1.00 | 104.38 | C | C |
| ATOM | 4226 | C   | LEU | C | 232 | 92.929 | 148.231 | -92.160  | 1.00 | 104.38 | C | C |
| ATOM | 4227 | O   | LEU | C | 232 | 92.808 | 148.076 | -90.945  | 1.00 | 104.38 | C | O |
| ATOM | 4228 | N   | ASP | C | 233 | 94.088 | 148.522 | -92.742  | 1.00 | 58.49  | C | N |
| ATOM | 4229 | CA  | ASP | C | 233 | 95.312 | 148.694 | -91.969  | 1.00 | 58.49  | C | C |
| ATOM | 4230 | CB  | ASP | C | 233 | 96.511 | 148.885 | -92.900  | 1.00 | 58.49  | C | C |
| ATOM | 4231 | CG  | ASP | C | 233 | 97.814 | 149.059 | -92.144  | 1.00 | 58.49  | C | C |
| ATOM | 4232 | OD1 | ASP | C | 233 | 97.942 | 148.490 | -91.039  | 1.00 | 58.49  | C | O |
| ATOM | 4233 | OD2 | ASP | C | 233 | 98.710 | 149.764 | -92.654  | 1.00 | 58.49  | C | O |
| ATOM | 4234 | C   | ASP | C | 233 | 95.193 | 149.880 | -91.017  | 1.00 | 58.49  | C | C |
| ATOM | 4235 | O   | ASP | C | 233 | 95.547 | 149.782 | -89.842  | 1.00 | 58.49  | C | O |
| ATOM | 4236 | N   | THR | C | 234 | 94.692 | 150.998 | -91.533  | 1.00 | 127.80 | C | N |
| ATOM | 4237 | CA  | THR | C | 234 | 94.510 | 152.200 | -90.728  | 1.00 | 127.80 | C | C |
| ATOM | 4238 | CB  | THR | C | 234 | 94.045 | 153.391 | -91.588  | 1.00 | 127.80 | C | C |
| ATOM | 4239 | OG1 | THR | C | 234 | 95.012 | 153.648 | -92.615  | 1.00 | 127.80 | C | O |
| ATOM | 4240 | CG2 | THR | C | 234 | 93.878 | 154.637 | -90.732  | 1.00 | 127.80 | C | C |
| ATOM | 4241 | C   | THR | C | 234 | 93.497 | 151.961 | -89.613  | 1.00 | 127.80 | C | C |
| ATOM | 4242 | O   | THR | C | 234 | 93.639 | 152.485 | -88.509  | 1.00 | 127.80 | C | O |
| ATOM | 4243 | N   | ALA | C | 235 | 92.475 | 151.164 | -89.911  | 1.00 | 35.61  | C | N |
| ATOM | 4244 | CA  | ALA | C | 235 | 91.442 | 150.845 | -88.933  | 1.00 | 35.61  | C | C |
| ATOM | 4245 | CB  | ALA | C | 235 | 90.301 | 150.088 | -89.596  | 1.00 | 35.61  | C | C |
| ATOM | 4246 | C   | ALA | C | 235 | 92.014 | 150.039 | -87.771  | 1.00 | 35.61  | C | C |
| ATOM | 4247 | O   | ALA | C | 235 | 91.679 | 150.282 | -86.611  | 1.00 | 35.61  | C | O |
| ATOM | 4248 | N   | CYS | C | 236 | 92.878 | 149.082 | -88.090  | 1.00 | 41.29  | C | N |
| ATOM | 4249 | CA  | CYS | C | 236 | 93.504 | 148.245 | -87.072  | 1.00 | 41.29  | C | C |
| ATOM | 4250 | CB  | CYS | C | 236 | 94.226 | 147.061 | -87.719  | 1.00 | 41.29  | C | C |
| ATOM | 4251 | SG  | CYS | C | 236 | 93.148 | 145.944 | -88.647  | 1.00 | 41.29  | C | S |
| ATOM | 4252 | C   | CYS | C | 236 | 94.478 | 149.051 | -86.220  | 1.00 | 41.29  | C | C |
| ATOM | 4253 | O   | CYS | C | 236 | 94.459 | 148.967 | -84.992  | 1.00 | 41.29  | C | O |
| ATOM | 4254 | N   | VAL | C | 237 | 95.329 | 149.832 | -86.879  | 1.00 | 109.38 | C | N |

|      |      |     |     |   |     |         |         |         |            |   |   |
|------|------|-----|-----|---|-----|---------|---------|---------|------------|---|---|
| ATOM | 4255 | CA  | VAL | C | 237 | 96.303  | 150.664 | -86.182 | 1.00109.38 | C | C |
| ATOM | 4256 | CB  | VAL | C | 237 | 97.242  | 151.382 | -87.170 | 1.00109.38 | C | C |
| ATOM | 4257 | CG1 | VAL | C | 237 | 98.187  | 152.314 | -86.426 | 1.00109.38 | C | C |
| ATOM | 4258 | CG2 | VAL | C | 237 | 98.023  | 150.368 | -87.991 | 1.00109.38 | C | C |
| ATOM | 4259 | C   | VAL | C | 237 | 95.607  | 151.698 | -85.303 | 1.00109.38 | C | C |
| ATOM | 4260 | O   | VAL | C | 237 | 96.085  | 152.025 | -84.217 | 1.00109.38 | C | O |
| ATOM | 4261 | N   | MET | C | 238 | 94.476  | 152.207 | -85.780 | 1.00141.41 | C | N |
| ATOM | 4262 | CA  | MET | C | 238 | 93.700  | 153.190 | -85.033 | 1.00141.41 | C | C |
| ATOM | 4263 | CB  | MET | C | 238 | 92.458  | 153.605 | -85.826 | 1.00141.41 | C | C |
| ATOM | 4264 | CG  | MET | C | 238 | 91.658  | 154.745 | -85.208 | 1.00141.41 | C | C |
| ATOM | 4265 | SD  | MET | C | 238 | 90.665  | 154.250 | -83.786 | 1.00141.41 | C | S |
| ATOM | 4266 | CE  | MET | C | 238 | 89.878  | 155.803 | -83.366 | 1.00141.41 | C | C |
| ATOM | 4267 | C   | MET | C | 238 | 93.300  | 152.632 | -83.672 | 1.00141.41 | C | C |
| ATOM | 4268 | O   | MET | C | 238 | 93.513  | 153.270 | -82.641 | 1.00141.41 | C | O |
| ATOM | 4269 | N   | ILE | C | 239 | 92.720  | 151.436 | -83.677 | 1.00163.25 | C | N |
| ATOM | 4270 | CA  | ILE | C | 239 | 92.299  | 150.783 | -82.445 | 1.00163.25 | C | C |
| ATOM | 4271 | CB  | ILE | C | 239 | 91.565  | 149.459 | -82.731 | 1.00163.25 | C | C |
| ATOM | 4272 | CG2 | ILE | C | 239 | 91.128  | 148.798 | -81.432 | 1.00163.25 | C | C |
| ATOM | 4273 | CG1 | ILE | C | 239 | 90.361  | 149.703 | -83.643 | 1.00163.25 | C | C |
| ATOM | 4274 | CD1 | ILE | C | 239 | 89.338  | 150.654 | -83.062 | 1.00163.25 | C | C |
| ATOM | 4275 | C   | ILE | C | 239 | 93.493  | 150.505 | -81.538 | 1.00163.25 | C | C |
| ATOM | 4276 | O   | ILE | C | 239 | 93.425  | 150.708 | -80.326 | 1.00163.25 | C | O |
| ATOM | 4277 | N   | PHE | C | 240 | 94.586  | 150.042 | -82.135 | 1.00 70.90 | C | N |
| ATOM | 4278 | CA  | PHE | C | 240 | 95.798  | 149.733 | -81.385 | 1.00 70.90 | C | C |
| ATOM | 4279 | CB  | PHE | C | 240 | 96.836  | 149.069 | -82.293 | 1.00 70.90 | C | C |
| ATOM | 4280 | CG  | PHE | C | 240 | 96.376  | 147.770 | -82.892 | 1.00 70.90 | C | C |
| ATOM | 4281 | CD1 | PHE | C | 240 | 95.366  | 147.034 | -82.294 | 1.00 70.90 | C | C |
| ATOM | 4282 | CD2 | PHE | C | 240 | 96.952  | 147.286 | -84.055 | 1.00 70.90 | C | C |
| ATOM | 4283 | CE1 | PHE | C | 240 | 94.941  | 145.839 | -82.843 | 1.00 70.90 | C | C |
| ATOM | 4284 | CE2 | PHE | C | 240 | 96.531  | 146.091 | -84.609 | 1.00 70.90 | C | C |
| ATOM | 4285 | CZ  | PHE | C | 240 | 95.524  | 145.367 | -84.002 | 1.00 70.90 | C | C |
| ATOM | 4286 | C   | PHE | C | 240 | 96.385  | 150.986 | -80.743 | 1.00 70.90 | C | C |
| ATOM | 4287 | O   | PHE | C | 240 | 96.926  | 150.934 | -79.639 | 1.00 70.90 | C | O |
| ATOM | 4288 | N   | THR | C | 241 | 96.275  | 152.111 | -81.443 | 1.00101.68 | C | N |
| ATOM | 4289 | CA  | THR | C | 241 | 96.793  | 153.379 | -80.943 | 1.00101.68 | C | C |
| ATOM | 4290 | CB  | THR | C | 241 | 96.812  | 154.456 | -82.043 | 1.00101.68 | C | C |
| ATOM | 4291 | OG1 | THR | C | 241 | 97.667  | 154.035 | -83.113 | 1.00101.68 | C | O |
| ATOM | 4292 | CG2 | THR | C | 241 | 97.318  | 155.778 | -81.487 | 1.00101.68 | C | C |
| ATOM | 4293 | C   | THR | C | 241 | 95.971  | 153.883 | -79.762 | 1.00101.68 | C | C |
| ATOM | 4294 | O   | THR | C | 241 | 96.523  | 154.332 | -78.757 | 1.00101.68 | C | O |
| ATOM | 4295 | N   | VAL | C | 242 | 94.650  | 153.804 | -79.889 | 1.00 32.84 | C | N |
| ATOM | 4296 | CA  | VAL | C | 242 | 93.750  | 154.241 | -78.828 | 1.00 32.84 | C | C |
| ATOM | 4297 | CB  | VAL | C | 242 | 92.273  | 154.058 | -79.226 | 1.00 32.84 | C | C |
| ATOM | 4298 | CG1 | VAL | C | 242 | 91.362  | 154.410 | -78.060 | 1.00 32.84 | C | C |
| ATOM | 4299 | CG2 | VAL | C | 242 | 91.944  | 154.910 | -80.442 | 1.00 32.84 | C | C |
| ATOM | 4300 | C   | VAL | C | 242 | 94.022  | 153.481 | -77.534 | 1.00 32.84 | C | C |
| ATOM | 4301 | O   | VAL | C | 242 | 94.043  | 154.066 | -76.451 | 1.00 32.84 | C | O |
| ATOM | 4302 | N   | GLU | C | 243 | 94.234  | 152.174 | -77.654 | 1.00 57.64 | C | N |
| ATOM | 4303 | CA  | GLU | C | 243 | 94.531  | 151.339 | -76.496 | 1.00 57.64 | C | C |
| ATOM | 4304 | CB  | GLU | C | 243 | 94.660  | 149.872 | -76.912 | 1.00 57.64 | C | C |
| ATOM | 4305 | CG  | GLU | C | 243 | 93.401  | 149.288 | -77.530 | 1.00 57.64 | C | C |
| ATOM | 4306 | CD  | GLU | C | 243 | 93.574  | 147.842 | -77.948 | 1.00 57.64 | C | C |
| ATOM | 4307 | OE1 | GLU | C | 243 | 92.651  | 147.291 | -78.584 | 1.00 57.64 | C | O |
| ATOM | 4308 | OE2 | GLU | C | 243 | 94.632  | 147.255 | -77.639 | 1.00 57.64 | C | O |
| ATOM | 4309 | C   | GLU | C | 243 | 95.810  | 151.801 | -75.807 | 1.00 57.64 | C | C |
| ATOM | 4310 | O   | GLU | C | 243 | 95.906  | 151.789 | -74.580 | 1.00 57.64 | C | O |
| ATOM | 4311 | N   | TYR | C | 244 | 96.790  | 152.207 | -76.607 | 1.00 53.95 | C | N |
| ATOM | 4312 | CA  | TYR | C | 244 | 98.061  | 152.688 | -76.080 | 1.00 53.95 | C | C |
| ATOM | 4313 | CB  | TYR | C | 244 | 99.087  | 152.835 | -77.206 | 1.00 53.95 | C | C |
| ATOM | 4314 | CG  | TYR | C | 244 | 100.379 | 153.492 | -76.776 | 1.00 53.95 | C | C |
| ATOM | 4315 | CD1 | TYR | C | 244 | 101.386 | 152.756 | -76.166 | 1.00 53.95 | C | C |
| ATOM | 4316 | CD2 | TYR | C | 244 | 100.594 | 154.848 | -76.984 | 1.00 53.95 | C | C |
| ATOM | 4317 | CE1 | TYR | C | 244 | 102.568 | 153.353 | -75.772 | 1.00 53.95 | C | C |
| ATOM | 4318 | CE2 | TYR | C | 244 | 101.773 | 155.453 | -76.593 | 1.00 53.95 | C | C |
| ATOM | 4319 | CZ  | TYR | C | 244 | 102.757 | 154.701 | -75.989 | 1.00 53.95 | C | C |
| ATOM | 4320 | OH  | TYR | C | 244 | 103.933 | 155.299 | -75.598 | 1.00 53.95 | C | O |
| ATOM | 4321 | C   | TYR | C | 244 | 97.893  | 154.015 | -75.348 | 1.00 53.95 | C | C |
| ATOM | 4322 | O   | TYR | C | 244 | 98.504  | 154.241 | -74.304 | 1.00 53.95 | C | O |

|      |      |     |     |   |     |         |         |         |      |        |   |   |
|------|------|-----|-----|---|-----|---------|---------|---------|------|--------|---|---|
| ATOM | 4323 | N   | LEU | C | 245 | 97.059  | 154.890 | -75.902 | 1.00 | 44.50  | C | N |
| ATOM | 4324 | CA  | LEU | C | 245 | 96.828  | 156.206 | -75.317 | 1.00 | 44.50  | C | C |
| ATOM | 4325 | CB  | LEU | C | 245 | 96.116  | 157.119 | -76.318 | 1.00 | 44.50  | C | C |
| ATOM | 4326 | CG  | LEU | C | 245 | 96.856  | 157.394 | -77.628 | 1.00 | 44.50  | C | C |
| ATOM | 4327 | CD1 | LEU | C | 245 | 96.004  | 158.243 | -78.558 | 1.00 | 44.50  | C | C |
| ATOM | 4328 | CD2 | LEU | C | 245 | 98.195  | 158.065 | -77.359 | 1.00 | 44.50  | C | C |
| ATOM | 4329 | C   | LEU | C | 245 | 96.023  | 156.115 | -74.024 | 1.00 | 44.50  | C | C |
| ATOM | 4330 | O   | LEU | C | 245 | 96.289  | 156.839 | -73.064 | 1.00 | 44.50  | C | O |
| ATOM | 4331 | N   | LEU | C | 246 | 95.038  | 155.224 | -74.006 | 1.00 | 93.07  | C | N |
| ATOM | 4332 | CA  | LEU | C | 246 | 94.181  | 155.053 | -72.838 | 1.00 | 93.07  | C | C |
| ATOM | 4333 | CB  | LEU | C | 246 | 92.960  | 154.198 | -73.184 | 1.00 | 93.07  | C | C |
| ATOM | 4334 | CG  | LEU | C | 246 | 91.985  | 154.793 | -74.202 | 1.00 | 93.07  | C | C |
| ATOM | 4335 | CD1 | LEU | C | 246 | 90.855  | 153.819 | -74.498 | 1.00 | 93.07  | C | C |
| ATOM | 4336 | CD2 | LEU | C | 246 | 91.435  | 156.122 | -73.705 | 1.00 | 93.07  | C | C |
| ATOM | 4337 | C   | LEU | C | 246 | 94.939  | 154.439 | -71.666 | 1.00 | 93.07  | C | C |
| ATOM | 4338 | O   | LEU | C | 246 | 94.899  | 154.960 | -70.552 | 1.00 | 93.07  | C | O |
| ATOM | 4339 | N   | ARG | C | 247 | 95.629  | 153.332 | -71.921 | 1.00 | 110.03 | C | N |
| ATOM | 4340 | CA  | ARG | C | 247 | 96.388  | 152.649 | -70.879 | 1.00 | 110.03 | C | C |
| ATOM | 4341 | CB  | ARG | C | 247 | 96.924  | 151.307 | -71.385 | 1.00 | 110.03 | C | C |
| ATOM | 4342 | CG  | ARG | C | 247 | 95.846  | 150.284 | -71.707 | 1.00 | 110.03 | C | C |
| ATOM | 4343 | CD  | ARG | C | 247 | 96.453  | 148.910 | -71.949 | 1.00 | 110.03 | C | C |
| ATOM | 4344 | NE  | ARG | C | 247 | 95.439  | 147.903 | -72.249 | 1.00 | 110.03 | C | N |
| ATOM | 4345 | CZ  | ARG | C | 247 | 95.115  | 147.511 | -73.477 | 1.00 | 110.03 | C | C |
| ATOM | 4346 | NH1 | ARG | C | 247 | 95.730  | 148.039 | -74.527 | 1.00 | 110.03 | C | N |
| ATOM | 4347 | NH2 | ARG | C | 247 | 94.180  | 146.589 | -73.656 | 1.00 | 110.03 | C | N |
| ATOM | 4348 | C   | ARG | C | 247 | 97.536  | 153.512 | -70.362 | 1.00 | 110.03 | C | C |
| ATOM | 4349 | O   | ARG | C | 247 | 97.988  | 153.343 | -69.230 | 1.00 | 110.03 | C | O |
| ATOM | 4350 | N   | LEU | C | 248 | 98.003  | 154.434 | -71.196 | 1.00 | 148.40 | C | N |
| ATOM | 4351 | CA  | LEU | C | 248 | 99.096  | 155.323 | -70.820 | 1.00 | 148.40 | C | C |
| ATOM | 4352 | CB  | LEU | C | 248 | 99.678  | 156.010 | -72.057 | 1.00 | 148.40 | C | C |
| ATOM | 4353 | CG  | LEU | C | 248 | 100.883 | 156.924 | -71.826 | 1.00 | 148.40 | C | C |
| ATOM | 4354 | CD1 | LEU | C | 248 | 102.023 | 156.155 | -71.177 | 1.00 | 148.40 | C | C |
| ATOM | 4355 | CD2 | LEU | C | 248 | 101.336 | 157.558 | -73.132 | 1.00 | 148.40 | C | C |
| ATOM | 4356 | C   | LEU | C | 248 | 98.630  | 156.368 | -69.810 | 1.00 | 148.40 | C | C |
| ATOM | 4357 | O   | LEU | C | 248 | 99.418  | 156.856 | -69.000 | 1.00 | 148.40 | C | O |
| ATOM | 4358 | N   | ALA | C | 249 | 97.346  | 156.704 | -69.865 | 1.00 | 46.03  | C | N |
| ATOM | 4359 | CA  | ALA | C | 249 | 96.775  | 157.695 | -68.961 | 1.00 | 46.03  | C | C |
| ATOM | 4360 | CB  | ALA | C | 249 | 95.883  | 158.660 | -69.727 | 1.00 | 46.03  | C | C |
| ATOM | 4361 | C   | ALA | C | 249 | 95.996  | 157.032 | -67.830 | 1.00 | 46.03  | C | C |
| ATOM | 4362 | O   | ALA | C | 249 | 95.626  | 157.683 | -66.853 | 1.00 | 46.03  | C | O |
| ATOM | 4363 | N   | ALA | C | 250 | 95.751  | 155.733 | -67.968 | 1.00 | 55.13  | C | N |
| ATOM | 4364 | CA  | ALA | C | 250 | 95.021  | 154.979 | -66.957 | 1.00 | 55.13  | C | C |
| ATOM | 4365 | CB  | ALA | C | 250 | 94.081  | 153.980 | -67.614 | 1.00 | 55.13  | C | C |
| ATOM | 4366 | C   | ALA | C | 250 | 95.977  | 154.267 | -66.007 | 1.00 | 55.13  | C | C |
| ATOM | 4367 | O   | ALA | C | 250 | 95.583  | 153.828 | -64.927 | 1.00 | 55.13  | C | O |
| ATOM | 4368 | N   | ALA | C | 251 | 97.237  | 154.155 | -66.418 | 1.00 | 67.05  | C | N |
| ATOM | 4369 | CA  | ALA | C | 251 | 98.252  | 153.501 | -65.602 | 1.00 | 67.05  | C | C |
| ATOM | 4370 | CB  | ALA | C | 251 | 99.484  | 153.188 | -66.437 | 1.00 | 67.05  | C | C |
| ATOM | 4371 | C   | ALA | C | 251 | 98.628  | 154.359 | -64.398 | 1.00 | 67.05  | C | C |
| ATOM | 4372 | O   | ALA | C | 251 | 99.051  | 155.504 | -64.555 | 1.00 | 67.05  | C | O |
| ATOM | 4373 | N   | PRO | C | 252 | 98.470  | 153.802 | -63.189 | 1.00 | 163.88 | C | N |
| ATOM | 4374 | CA  | PRO | C | 252 | 98.798  | 154.495 | -61.939 | 1.00 | 163.88 | C | C |
| ATOM | 4375 | CD  | PRO | C | 252 | 97.923  | 152.455 | -62.947 | 1.00 | 163.88 | C | C |
| ATOM | 4376 | CB  | PRO | C | 252 | 98.607  | 153.406 | -60.880 | 1.00 | 163.88 | C | C |
| ATOM | 4377 | CG  | PRO | C | 252 | 97.615  | 152.473 | -61.479 | 1.00 | 163.88 | C | C |
| ATOM | 4378 | C   | PRO | C | 252 | 100.241 | 154.989 | -61.926 | 1.00 | 163.88 | C | C |
| ATOM | 4379 | O   | PRO | C | 252 | 100.550 | 155.973 | -61.254 | 1.00 | 163.88 | C | O |
| ATOM | 4380 | N   | SER | C | 253 | 101.111 | 154.308 | -62.665 | 1.00 | 124.25 | C | N |
| ATOM | 4381 | CA  | SER | C | 253 | 102.518 | 154.686 | -62.735 | 1.00 | 124.25 | C | C |
| ATOM | 4382 | CB  | SER | C | 253 | 103.400 | 153.572 | -62.165 | 1.00 | 124.25 | C | C |
| ATOM | 4383 | OG  | SER | C | 253 | 104.771 | 153.925 | -62.226 | 1.00 | 124.25 | C | O |
| ATOM | 4384 | C   | SER | C | 253 | 102.934 | 155.002 | -64.167 | 1.00 | 124.25 | C | C |
| ATOM | 4385 | O   | SER | C | 253 | 102.551 | 154.301 | -65.104 | 1.00 | 124.25 | C | O |
| ATOM | 4386 | N   | ARG | C | 254 | 103.721 | 156.061 | -64.330 | 1.00 | 172.72 | C | N |
| ATOM | 4387 | CA  | ARG | C | 254 | 104.195 | 156.469 | -65.647 | 1.00 | 172.72 | C | C |
| ATOM | 4388 | CB  | ARG | C | 254 | 104.000 | 157.973 | -65.845 | 1.00 | 172.72 | C | C |
| ATOM | 4389 | CG  | ARG | C | 254 | 102.547 | 158.419 | -65.825 | 1.00 | 172.72 | C | C |
| ATOM | 4390 | CD  | ARG | C | 254 | 101.758 | 157.768 | -66.948 | 1.00 | 172.72 | C | C |

|      |      |     |     |   |     |         |         |         |            |   |   |
|------|------|-----|-----|---|-----|---------|---------|---------|------------|---|---|
| ATOM | 4391 | NE  | ARG | C | 254 | 102.302 | 158.100 | -68.262 | 1.00172.72 | C | N |
| ATOM | 4392 | CZ  | ARG | C | 254 | 101.926 | 159.152 | -68.982 | 1.00172.72 | C | C |
| ATOM | 4393 | NH1 | ARG | C | 254 | 101.001 | 159.980 | -68.517 | 1.00172.72 | C | N |
| ATOM | 4394 | NH2 | ARG | C | 254 | 102.476 | 159.377 | -70.168 | 1.00172.72 | C | N |
| ATOM | 4395 | C   | ARG | C | 254 | 105.661 | 156.100 | -65.846 | 1.00172.72 | C | C |
| ATOM | 4396 | O   | ARG | C | 254 | 106.223 | 156.314 | -66.920 | 1.00172.72 | C | O |
| ATOM | 4397 | N   | TYR | C | 255 | 106.275 | 155.548 | -64.805 | 1.00 99.39 | C | N |
| ATOM | 4398 | CA  | TYR | C | 255 | 107.675 | 155.146 | -64.870 | 1.00 99.39 | C | C |
| ATOM | 4399 | CB  | TYR | C | 255 | 108.420 | 155.587 | -63.607 | 1.00 99.39 | C | C |
| ATOM | 4400 | CG  | TYR | C | 255 | 109.913 | 155.349 | -63.660 | 1.00 99.39 | C | C |
| ATOM | 4401 | CD1 | TYR | C | 255 | 110.766 | 156.290 | -64.221 | 1.00 99.39 | C | C |
| ATOM | 4402 | CD2 | TYR | C | 255 | 110.469 | 154.186 | -63.146 | 1.00 99.39 | C | C |
| ATOM | 4403 | CE1 | TYR | C | 255 | 112.130 | 156.078 | -64.271 | 1.00 99.39 | C | C |
| ATOM | 4404 | CE2 | TYR | C | 255 | 111.832 | 153.965 | -63.191 | 1.00 99.39 | C | C |
| ATOM | 4405 | CZ  | TYR | C | 255 | 112.658 | 154.914 | -63.754 | 1.00 99.39 | C | C |
| ATOM | 4406 | OH  | TYR | C | 255 | 114.016 | 154.699 | -63.802 | 1.00 99.39 | C | O |
| ATOM | 4407 | C   | TYR | C | 255 | 107.801 | 153.638 | -65.058 | 1.00 99.39 | C | C |
| ATOM | 4408 | O   | TYR | C | 255 | 108.798 | 153.149 | -65.590 | 1.00 99.39 | C | O |
| ATOM | 4409 | N   | ARG | C | 256 | 106.782 | 152.906 | -64.621 | 1.00167.77 | C | N |
| ATOM | 4410 | CA  | ARG | C | 256 | 106.767 | 151.454 | -64.754 | 1.00167.77 | C | C |
| ATOM | 4411 | CB  | ARG | C | 256 | 106.096 | 150.812 | -63.539 | 1.00167.77 | C | C |
| ATOM | 4412 | CG  | ARG | C | 256 | 106.813 | 151.067 | -62.223 | 1.00167.77 | C | C |
| ATOM | 4413 | CD  | ARG | C | 256 | 106.070 | 150.430 | -61.060 | 1.00167.77 | C | C |
| ATOM | 4414 | NE  | ARG | C | 256 | 105.877 | 148.996 | -61.255 | 1.00167.77 | C | N |
| ATOM | 4415 | CZ  | ARG | C | 256 | 106.734 | 148.064 | -60.849 | 1.00167.77 | C | C |
| ATOM | 4416 | NH1 | ARG | C | 256 | 107.850 | 148.414 | -60.223 | 1.00167.77 | C | N |
| ATOM | 4417 | NH2 | ARG | C | 256 | 106.477 | 146.782 | -61.069 | 1.00167.77 | C | N |
| ATOM | 4418 | C   | ARG | C | 256 | 106.053 | 151.025 | -66.032 | 1.00167.77 | C | C |
| ATOM | 4419 | O   | ARG | C | 256 | 105.861 | 149.835 | -66.278 | 1.00167.77 | C | O |
| ATOM | 4420 | N   | PHE | C | 257 | 105.661 | 152.005 | -66.840 | 1.00 86.55 | C | N |
| ATOM | 4421 | CA  | PHE | C | 257 | 104.958 | 151.733 | -68.089 | 1.00 86.55 | C | C |
| ATOM | 4422 | CB  | PHE | C | 257 | 104.268 | 153.000 | -68.601 | 1.00 86.55 | C | C |
| ATOM | 4423 | CG  | PHE | C | 257 | 103.546 | 152.811 | -69.905 | 1.00 86.55 | C | C |
| ATOM | 4424 | CD1 | PHE | C | 257 | 102.246 | 152.335 | -69.929 | 1.00 86.55 | C | C |
| ATOM | 4425 | CD2 | PHE | C | 257 | 104.167 | 153.113 | -71.106 | 1.00 86.55 | C | C |
| ATOM | 4426 | CE1 | PHE | C | 257 | 101.578 | 152.162 | -71.128 | 1.00 86.55 | C | C |
| ATOM | 4427 | CE2 | PHE | C | 257 | 103.505 | 152.942 | -72.307 | 1.00 86.55 | C | C |
| ATOM | 4428 | CZ  | PHE | C | 257 | 102.209 | 152.466 | -72.318 | 1.00 86.55 | C | C |
| ATOM | 4429 | C   | PHE | C | 257 | 105.903 | 151.185 | -69.152 | 1.00 86.55 | C | C |
| ATOM | 4430 | O   | PHE | C | 257 | 105.609 | 150.181 | -69.799 | 1.00 86.55 | C | O |
| ATOM | 4431 | N   | VAL | C | 258 | 107.041 | 151.850 | -69.325 | 1.00126.69 | C | N |
| ATOM | 4432 | CA  | VAL | C | 258 | 108.021 | 151.444 | -70.325 | 1.00126.69 | C | C |
| ATOM | 4433 | CB  | VAL | C | 258 | 109.003 | 152.584 | -70.647 | 1.00126.69 | C | C |
| ATOM | 4434 | CG1 | VAL | C | 258 | 108.263 | 153.767 | -71.253 | 1.00126.69 | C | C |
| ATOM | 4435 | CG2 | VAL | C | 258 | 109.758 | 153.003 | -69.394 | 1.00126.69 | C | C |
| ATOM | 4436 | C   | VAL | C | 258 | 108.811 | 150.219 | -69.874 | 1.00126.69 | C | C |
| ATOM | 4437 | O   | VAL | C | 258 | 109.659 | 149.712 | -70.608 | 1.00126.69 | C | O |
| ATOM | 4438 | N   | ARG | C | 259 | 108.527 | 149.747 | -68.664 | 1.00166.93 | C | N |
| ATOM | 4439 | CA  | ARG | C | 259 | 109.214 | 148.583 | -68.118 | 1.00166.93 | C | C |
| ATOM | 4440 | CB  | ARG | C | 259 | 109.356 | 148.706 | -66.600 | 1.00166.93 | C | C |
| ATOM | 4441 | CG  | ARG | C | 259 | 110.122 | 147.562 | -65.954 | 1.00166.93 | C | C |
| ATOM | 4442 | CD  | ARG | C | 259 | 110.212 | 147.738 | -64.448 | 1.00166.93 | C | C |
| ATOM | 4443 | NE  | ARG | C | 259 | 110.993 | 146.675 | -63.820 | 1.00166.93 | C | N |
| ATOM | 4444 | CZ  | ARG | C | 259 | 110.481 | 145.528 | -63.387 | 1.00166.93 | C | C |
| ATOM | 4445 | NH1 | ARG | C | 259 | 109.182 | 145.289 | -63.512 | 1.00166.93 | C | N |
| ATOM | 4446 | NH2 | ARG | C | 259 | 111.267 | 144.618 | -62.828 | 1.00166.93 | C | N |
| ATOM | 4447 | C   | ARG | C | 259 | 108.484 | 147.291 | -68.473 | 1.00166.93 | C | C |
| ATOM | 4448 | O   | ARG | C | 259 | 109.110 | 146.250 | -68.677 | 1.00166.93 | C | O |
| ATOM | 4449 | N   | SER | C | 260 | 107.159 | 147.364 | -68.543 | 1.00 90.97 | C | N |
| ATOM | 4450 | CA  | SER | C | 260 | 106.344 | 146.199 | -68.866 | 1.00 90.97 | C | C |
| ATOM | 4451 | CB  | SER | C | 260 | 104.856 | 146.530 | -68.727 | 1.00 90.97 | C | C |
| ATOM | 4452 | OG  | SER | C | 260 | 104.544 | 146.933 | -67.405 | 1.00 90.97 | C | O |
| ATOM | 4453 | C   | SER | C | 260 | 106.639 | 145.688 | -70.272 | 1.00 90.97 | C | C |
| ATOM | 4454 | O   | SER | C | 260 | 106.957 | 146.466 | -71.171 | 1.00 90.97 | C | O |
| ATOM | 4455 | N   | VAL | C | 261 | 106.533 | 144.376 | -70.455 | 1.00 94.76 | C | N |
| ATOM | 4456 | CA  | VAL | C | 261 | 106.797 | 143.759 | -71.750 | 1.00 94.76 | C | C |
| ATOM | 4457 | CB  | VAL | C | 261 | 107.270 | 142.300 | -71.596 | 1.00 94.76 | C | C |
| ATOM | 4458 | CG1 | VAL | C | 261 | 108.610 | 142.249 | -70.879 | 1.00 94.76 | C | C |

|      |      |     |     |   |     |         |         |         |      |        |   |   |
|------|------|-----|-----|---|-----|---------|---------|---------|------|--------|---|---|
| ATOM | 4459 | CG2 | VAL | C | 261 | 106.228 | 141.477 | -70.853 | 1.00 | 94.76  | C | C |
| ATOM | 4460 | C   | VAL | C | 261 | 105.564 | 143.794 | -72.647 | 1.00 | 94.76  | C | C |
| ATOM | 4461 | O   | VAL | C | 261 | 105.675 | 143.748 | -73.872 | 1.00 | 94.76  | C | O |
| ATOM | 4462 | N   | MET | C | 262 | 104.389 | 143.875 | -72.031 | 1.00 | 60.02  | C | N |
| ATOM | 4463 | CA  | MET | C | 262 | 103.136 | 143.920 | -72.775 | 1.00 | 60.02  | C | C |
| ATOM | 4464 | CB  | MET | C | 262 | 101.951 | 143.629 | -71.852 | 1.00 | 60.02  | C | C |
| ATOM | 4465 | CG  | MET | C | 262 | 101.979 | 142.245 | -71.225 | 1.00 | 60.02  | C | C |
| ATOM | 4466 | SD  | MET | C | 262 | 101.979 | 140.927 | -72.455 | 1.00 | 60.02  | C | S |
| ATOM | 4467 | CE  | MET | C | 262 | 101.996 | 139.479 | -71.402 | 1.00 | 60.02  | C | C |
| ATOM | 4468 | C   | MET | C | 262 | 102.951 | 145.272 | -73.457 | 1.00 | 60.02  | C | C |
| ATOM | 4469 | O   | MET | C | 262 | 102.392 | 145.355 | -74.551 | 1.00 | 60.02  | C | O |
| ATOM | 4470 | N   | SER | C | 263 | 103.426 | 146.327 | -72.804 | 1.00 | 83.90  | C | N |
| ATOM | 4471 | CA  | SER | C | 263 | 103.320 | 147.676 | -73.346 | 1.00 | 83.90  | C | C |
| ATOM | 4472 | CB  | SER | C | 263 | 103.695 | 148.709 | -72.282 | 1.00 | 83.90  | C | C |
| ATOM | 4473 | OG  | SER | C | 263 | 105.033 | 148.530 | -71.851 | 1.00 | 83.90  | C | O |
| ATOM | 4474 | C   | SER | C | 263 | 104.208 | 147.847 | -74.574 | 1.00 | 83.90  | C | C |
| ATOM | 4475 | O   | SER | C | 263 | 103.820 | 148.492 | -75.547 | 1.00 | 83.90  | C | O |
| ATOM | 4476 | N   | ILE | C | 264 | 105.402 | 147.265 | -74.518 | 1.00 | 88.68  | C | N |
| ATOM | 4477 | CA  | ILE | C | 264 | 106.348 | 147.345 | -75.625 | 1.00 | 88.68  | C | C |
| ATOM | 4478 | CB  | ILE | C | 264 | 107.663 | 146.614 | -75.296 | 1.00 | 88.68  | C | C |
| ATOM | 4479 | CG2 | ILE | C | 264 | 108.640 | 146.720 | -76.458 | 1.00 | 88.68  | C | C |
| ATOM | 4480 | CG1 | ILE | C | 264 | 108.283 | 147.180 | -74.017 | 1.00 | 88.68  | C | C |
| ATOM | 4481 | CD1 | ILE | C | 264 | 108.624 | 148.652 | -74.103 | 1.00 | 88.68  | C | C |
| ATOM | 4482 | C   | ILE | C | 264 | 105.754 | 146.754 | -76.899 | 1.00 | 88.68  | C | C |
| ATOM | 4483 | O   | ILE | C | 264 | 105.908 | 147.313 | -77.985 | 1.00 | 88.68  | C | O |
| ATOM | 4484 | N   | ILE | C | 265 | 105.074 | 145.620 | -76.757 | 1.00 | 113.98 | C | N |
| ATOM | 4485 | CA  | ILE | C | 265 | 104.443 | 144.957 | -77.892 | 1.00 | 113.98 | C | C |
| ATOM | 4486 | CB  | ILE | C | 265 | 103.797 | 143.621 | -77.475 | 1.00 | 113.98 | C | C |
| ATOM | 4487 | CG2 | ILE | C | 265 | 103.161 | 142.938 | -78.676 | 1.00 | 113.98 | C | C |
| ATOM | 4488 | CG1 | ILE | C | 265 | 104.837 | 142.708 | -76.823 | 1.00 | 113.98 | C | C |
| ATOM | 4489 | CD1 | ILE | C | 265 | 104.285 | 141.370 | -76.383 | 1.00 | 113.98 | C | C |
| ATOM | 4490 | C   | ILE | C | 265 | 103.382 | 145.852 | -78.524 | 1.00 | 113.98 | C | C |
| ATOM | 4491 | O   | ILE | C | 265 | 103.227 | 145.880 | -79.745 | 1.00 | 113.98 | C | O |
| ATOM | 4492 | N   | ASP | C | 266 | 102.656 | 146.583 | -77.685 | 1.00 | 68.21  | C | N |
| ATOM | 4493 | CA  | ASP | C | 266 | 101.620 | 147.491 | -78.161 | 1.00 | 68.21  | C | C |
| ATOM | 4494 | CB  | ASP | C | 266 | 100.778 | 148.004 | -76.991 | 1.00 | 68.21  | C | C |
| ATOM | 4495 | CG  | ASP | C | 266 | 100.100 | 146.884 | -76.226 | 1.00 | 68.21  | C | C |
| ATOM | 4496 | OD1 | ASP | C | 266 | 99.781  | 145.848 | -76.846 | 1.00 | 68.21  | C | O |
| ATOM | 4497 | OD2 | ASP | C | 266 | 99.887  | 147.039 | -75.005 | 1.00 | 68.21  | C | O |
| ATOM | 4498 | C   | ASP | C | 266 | 102.229 | 148.664 | -78.923 | 1.00 | 68.21  | C | C |
| ATOM | 4499 | O   | ASP | C | 266 | 101.588 | 149.250 | -79.796 | 1.00 | 68.21  | C | O |
| ATOM | 4500 | N   | VAL | C | 267 | 103.470 | 149.001 | -78.586 | 1.00 | 104.56 | C | N |
| ATOM | 4501 | CA  | VAL | C | 267 | 104.170 | 150.100 | -79.241 | 1.00 | 104.56 | C | C |
| ATOM | 4502 | CB  | VAL | C | 267 | 105.358 | 150.596 | -78.394 | 1.00 | 104.56 | C | C |
| ATOM | 4503 | CG1 | VAL | C | 267 | 106.111 | 151.695 | -79.128 | 1.00 | 104.56 | C | C |
| ATOM | 4504 | CG2 | VAL | C | 267 | 104.873 | 151.088 | -77.039 | 1.00 | 104.56 | C | C |
| ATOM | 4505 | C   | VAL | C | 267 | 104.680 | 149.687 | -80.618 | 1.00 | 104.56 | C | C |
| ATOM | 4506 | O   | VAL | C | 267 | 104.420 | 150.362 | -81.614 | 1.00 | 104.56 | C | O |
| ATOM | 4507 | N   | VAL | C | 268 | 105.402 | 148.573 | -80.666 | 1.00 | 100.82 | C | N |
| ATOM | 4508 | CA  | VAL | C | 268 | 105.968 | 148.073 | -81.914 | 1.00 | 100.82 | C | C |
| ATOM | 4509 | CB  | VAL | C | 268 | 106.862 | 146.840 | -81.667 | 1.00 | 100.82 | C | C |
| ATOM | 4510 | CG1 | VAL | C | 268 | 107.545 | 146.407 | -82.956 | 1.00 | 100.82 | C | C |
| ATOM | 4511 | CG2 | VAL | C | 268 | 107.895 | 147.143 | -80.593 | 1.00 | 100.82 | C | C |
| ATOM | 4512 | C   | VAL | C | 268 | 104.872 | 147.713 | -82.915 | 1.00 | 100.82 | C | C |
| ATOM | 4513 | O   | VAL | C | 268 | 105.124 | 147.602 | -84.114 | 1.00 | 100.82 | C | O |
| ATOM | 4514 | N   | ALA | C | 269 | 103.653 | 147.541 | -82.414 | 1.00 | 69.40  | C | N |
| ATOM | 4515 | CA  | ALA | C | 269 | 102.526 | 147.165 | -83.259 | 1.00 | 69.40  | C | C |
| ATOM | 4516 | CB  | ALA | C | 269 | 101.427 | 146.525 | -82.421 | 1.00 | 69.40  | C | C |
| ATOM | 4517 | C   | ALA | C | 269 | 101.974 | 148.353 | -84.045 | 1.00 | 69.40  | C | C |
| ATOM | 4518 | O   | ALA | C | 269 | 101.075 | 148.194 | -84.870 | 1.00 | 69.40  | C | O |
| ATOM | 4519 | N   | ILE | C | 270 | 102.514 | 149.540 | -83.787 | 1.00 | 105.76 | C | N |
| ATOM | 4520 | CA  | ILE | C | 270 | 102.052 | 150.749 | -84.462 | 1.00 | 105.76 | C | C |
| ATOM | 4521 | CB  | ILE | C | 270 | 101.166 | 151.612 | -83.539 | 1.00 | 105.76 | C | C |
| ATOM | 4522 | CG2 | ILE | C | 270 | 99.946  | 150.827 | -83.081 | 1.00 | 105.76 | C | C |
| ATOM | 4523 | CG1 | ILE | C | 270 | 101.972 | 152.112 | -82.339 | 1.00 | 105.76 | C | C |
| ATOM | 4524 | CD1 | ILE | C | 270 | 101.169 | 152.954 | -81.372 | 1.00 | 105.76 | C | C |
| ATOM | 4525 | C   | ILE | C | 270 | 103.206 | 151.604 | -84.980 | 1.00 | 105.76 | C | C |
| ATOM | 4526 | O   | ILE | C | 270 | 102.992 | 152.562 | -85.723 | 1.00 | 105.76 | C | O |

|      |      |     |     |   |     |         |         |         |      |        |   |   |
|------|------|-----|-----|---|-----|---------|---------|---------|------|--------|---|---|
| ATOM | 4527 | N   | LEU | C | 271 | 104.427 | 151.254 | -84.587 | 1.00 | 71.73  | C | N |
| ATOM | 4528 | CA  | LEU | C | 271 | 105.609 | 152.005 | -85.005 | 1.00 | 71.73  | C | C |
| ATOM | 4529 | CB  | LEU | C | 271 | 106.864 | 151.496 | -84.288 | 1.00 | 71.73  | C | C |
| ATOM | 4530 | CG  | LEU | C | 271 | 106.937 | 151.734 | -82.779 | 1.00 | 71.73  | C | C |
| ATOM | 4531 | CD1 | LEU | C | 271 | 108.206 | 151.126 | -82.201 | 1.00 | 71.73  | C | C |
| ATOM | 4532 | CD2 | LEU | C | 271 | 106.859 | 153.220 | -82.467 | 1.00 | 71.73  | C | C |
| ATOM | 4533 | C   | LEU | C | 271 | 105.819 | 151.998 | -86.522 | 1.00 | 71.73  | C | C |
| ATOM | 4534 | O   | LEU | C | 271 | 105.976 | 153.058 | -87.128 | 1.00 | 71.73  | C | O |
| ATOM | 4535 | N   | PRO | C | 272 | 105.825 | 150.805 | -87.140 | 1.00 | 85.42  | C | N |
| ATOM | 4536 | CA  | PRO | C | 272 | 106.049 | 150.716 | -88.588 | 1.00 | 85.42  | C | C |
| ATOM | 4537 | CD  | PRO | C | 272 | 105.668 | 149.473 | -86.528 | 1.00 | 85.42  | C | C |
| ATOM | 4538 | CB  | PRO | C | 272 | 105.851 | 149.226 | -88.878 | 1.00 | 85.42  | C | C |
| ATOM | 4539 | CG  | PRO | C | 272 | 106.172 | 148.549 | -87.595 | 1.00 | 85.42  | C | C |
| ATOM | 4540 | C   | PRO | C | 272 | 105.044 | 151.540 | -89.388 | 1.00 | 85.42  | C | C |
| ATOM | 4541 | O   | PRO | C | 272 | 105.327 | 151.915 | -90.526 | 1.00 | 85.42  | C | O |
| ATOM | 4542 | N   | TYR | C | 273 | 103.886 | 151.815 | -88.797 | 1.00 | 80.36  | C | N |
| ATOM | 4543 | CA  | TYR | C | 273 | 102.844 | 152.576 | -89.476 | 1.00 | 80.36  | C | C |
| ATOM | 4544 | CB  | TYR | C | 273 | 101.509 | 152.435 | -88.740 | 1.00 | 80.36  | C | C |
| ATOM | 4545 | CG  | TYR | C | 273 | 100.363 | 153.161 | -89.407 | 1.00 | 80.36  | C | C |
| ATOM | 4546 | CD1 | TYR | C | 273 | 99.624  | 152.556 | -90.414 | 1.00 | 80.36  | C | C |
| ATOM | 4547 | CD2 | TYR | C | 273 | 100.019 | 154.452 | -89.028 | 1.00 | 80.36  | C | C |
| ATOM | 4548 | CE1 | TYR | C | 273 | 98.575  | 153.216 | -91.026 | 1.00 | 80.36  | C | C |
| ATOM | 4549 | CE2 | TYR | C | 273 | 98.972  | 155.120 | -89.634 | 1.00 | 80.36  | C | C |
| ATOM | 4550 | CZ  | TYR | C | 273 | 98.253  | 154.498 | -90.632 | 1.00 | 80.36  | C | C |
| ATOM | 4551 | OH  | TYR | C | 273 | 97.210  | 155.158 | -91.239 | 1.00 | 80.36  | C | O |
| ATOM | 4552 | C   | TYR | C | 273 | 103.218 | 154.050 | -89.604 | 1.00 | 80.36  | C | C |
| ATOM | 4553 | O   | TYR | C | 273 | 103.237 | 154.602 | -90.704 | 1.00 | 80.36  | C | O |
| ATOM | 4554 | N   | TYR | C | 274 | 103.514 | 154.682 | -88.473 | 1.00 | 58.29  | C | N |
| ATOM | 4555 | CA  | TYR | C | 274 | 103.863 | 156.098 | -88.455 | 1.00 | 58.29  | C | C |
| ATOM | 4556 | CB  | TYR | C | 274 | 103.858 | 156.633 | -87.022 | 1.00 | 58.29  | C | C |
| ATOM | 4557 | CG  | TYR | C | 274 | 102.498 | 156.598 | -86.363 | 1.00 | 58.29  | C | C |
| ATOM | 4558 | CD1 | TYR | C | 274 | 102.094 | 155.501 | -85.614 | 1.00 | 58.29  | C | C |
| ATOM | 4559 | CD2 | TYR | C | 274 | 101.615 | 157.662 | -86.494 | 1.00 | 58.29  | C | C |
| ATOM | 4560 | CE1 | TYR | C | 274 | 100.851 | 155.465 | -85.012 | 1.00 | 58.29  | C | C |
| ATOM | 4561 | CE2 | TYR | C | 274 | 100.370 | 157.635 | -85.896 | 1.00 | 58.29  | C | C |
| ATOM | 4562 | CZ  | TYR | C | 274 | 99.993  | 156.534 | -85.156 | 1.00 | 58.29  | C | C |
| ATOM | 4563 | OH  | TYR | C | 274 | 98.754  | 156.504 | -84.559 | 1.00 | 58.29  | C | O |
| ATOM | 4564 | C   | TYR | C | 274 | 105.217 | 156.356 | -89.108 | 1.00 | 58.29  | C | C |
| ATOM | 4565 | O   | TYR | C | 274 | 105.373 | 157.303 | -89.879 | 1.00 | 58.29  | C | O |
| ATOM | 4566 | N   | ILE | C | 275 | 106.192 | 155.509 | -88.796 | 1.00 | 98.26  | C | N |
| ATOM | 4567 | CA  | ILE | C | 275 | 107.535 | 155.651 | -89.346 | 1.00 | 98.26  | C | C |
| ATOM | 4568 | CB  | ILE | C | 275 | 108.497 | 154.594 | -88.768 | 1.00 | 98.26  | C | C |
| ATOM | 4569 | CG2 | ILE | C | 275 | 109.874 | 154.723 | -89.400 | 1.00 | 98.26  | C | C |
| ATOM | 4570 | CG1 | ILE | C | 275 | 108.592 | 154.734 | -87.247 | 1.00 | 98.26  | C | C |
| ATOM | 4571 | CD1 | ILE | C | 275 | 109.507 | 153.720 | -86.597 | 1.00 | 98.26  | C | C |
| ATOM | 4572 | C   | ILE | C | 275 | 107.529 | 155.546 | -90.868 | 1.00 | 98.26  | C | C |
| ATOM | 4573 | O   | ILE | C | 275 | 108.214 | 156.305 | -91.555 | 1.00 | 98.26  | C | O |
| ATOM | 4574 | N   | GLY | C | 276 | 106.750 | 154.605 | -91.390 | 1.00 | 33.27  | C | N |
| ATOM | 4575 | CA  | GLY | C | 276 | 106.661 | 154.397 | -92.823 | 1.00 | 33.27  | C | C |
| ATOM | 4576 | C   | GLY | C | 276 | 106.044 | 155.574 | -93.553 | 1.00 | 33.27  | C | C |
| ATOM | 4577 | O   | GLY | C | 276 | 106.501 | 155.957 | -94.630 | 1.00 | 33.27  | C | O |
| ATOM | 4578 | N   | LEU | C | 277 | 105.002 | 156.151 | -92.964 | 1.00 | 135.89 | C | N |
| ATOM | 4579 | CA  | LEU | C | 277 | 104.304 | 157.279 | -93.573 | 1.00 | 135.89 | C | C |
| ATOM | 4580 | CB  | LEU | C | 277 | 103.042 | 157.620 | -92.779 | 1.00 | 135.89 | C | C |
| ATOM | 4581 | CG  | LEU | C | 277 | 102.211 | 158.794 | -93.302 | 1.00 | 135.89 | C | C |
| ATOM | 4582 | CD1 | LEU | C | 277 | 101.805 | 158.563 | -94.750 | 1.00 | 135.89 | C | C |
| ATOM | 4583 | CD2 | LEU | C | 277 | 100.988 | 159.017 | -92.427 | 1.00 | 135.89 | C | C |
| ATOM | 4584 | C   | LEU | C | 277 | 105.205 | 158.505 | -93.677 | 1.00 | 135.89 | C | C |
| ATOM | 4585 | O   | LEU | C | 277 | 105.163 | 159.235 | -94.667 | 1.00 | 135.89 | C | O |
| ATOM | 4586 | N   | VAL | C | 278 | 106.018 | 158.727 | -92.649 | 1.00 | 91.77  | C | N |
| ATOM | 4587 | CA  | VAL | C | 278 | 106.915 | 159.875 | -92.617 | 1.00 | 91.77  | C | C |
| ATOM | 4588 | CB  | VAL | C | 278 | 107.463 | 160.123 | -91.199 | 1.00 | 91.77  | C | C |
| ATOM | 4589 | CG1 | VAL | C | 278 | 108.437 | 161.292 | -91.203 | 1.00 | 91.77  | C | C |
| ATOM | 4590 | CG2 | VAL | C | 278 | 106.323 | 160.376 | -90.226 | 1.00 | 91.77  | C | C |
| ATOM | 4591 | C   | VAL | C | 278 | 108.084 | 159.697 | -93.581 | 1.00 | 91.77  | C | C |
| ATOM | 4592 | O   | VAL | C | 278 | 108.455 | 160.625 | -94.300 | 1.00 | 91.77  | C | O |
| ATOM | 4593 | N   | MET | C | 279 | 108.658 | 158.499 | -93.592 | 1.00 | 131.98 | C | N |
| ATOM | 4594 | CA  | MET | C | 279 | 109.807 | 158.207 | -94.443 | 1.00 | 131.98 | C | C |

|      |      |     |     |   |     |         |         |          |      |        |   |   |
|------|------|-----|-----|---|-----|---------|---------|----------|------|--------|---|---|
| ATOM | 4595 | CB  | MET | C | 279 | 110.361 | 156.813 | -94.140  | 1.00 | 131.98 | C | C |
| ATOM | 4596 | CG  | MET | C | 279 | 111.589 | 156.445 | -94.957  | 1.00 | 131.98 | C | C |
| ATOM | 4597 | SD  | MET | C | 279 | 112.250 | 154.822 | -94.535  | 1.00 | 131.98 | C | S |
| ATOM | 4598 | CE  | MET | C | 279 | 112.675 | 155.064 | -92.812  | 1.00 | 131.98 | C | C |
| ATOM | 4599 | C   | MET | C | 279 | 109.460 | 158.326 | -95.924  | 1.00 | 131.98 | C | C |
| ATOM | 4600 | O   | MET | C | 279 | 110.182 | 158.964 | -96.690  | 1.00 | 131.98 | C | O |
| ATOM | 4601 | N   | THR | C | 280 | 108.351 | 157.709 | -96.322  | 1.00 | 57.64  | C | N |
| ATOM | 4602 | CA  | THR | C | 280 | 107.917 | 157.739 | -97.715  | 1.00 | 57.64  | C | C |
| ATOM | 4603 | CB  | THR | C | 280 | 106.720 | 156.800 | -97.957  | 1.00 | 57.64  | C | C |
| ATOM | 4604 | OG1 | THR | C | 280 | 105.632 | 157.179 | -97.106  | 1.00 | 57.64  | C | O |
| ATOM | 4605 | CG2 | THR | C | 280 | 107.107 | 155.358 | -97.667  | 1.00 | 57.64  | C | C |
| ATOM | 4606 | C   | THR | C | 280 | 107.542 | 159.150 | -98.155  | 1.00 | 57.64  | C | C |
| ATOM | 4607 | O   | THR | C | 280 | 107.532 | 159.455 | -99.348  | 1.00 | 57.64  | C | O |
| ATOM | 4608 | N   | ASP | C | 281 | 107.232 | 160.006 | -97.187  | 1.00 | 89.40  | C | N |
| ATOM | 4609 | CA  | ASP | C | 281 | 106.865 | 161.387 | -97.475  | 1.00 | 89.40  | C | C |
| ATOM | 4610 | CB  | ASP | C | 281 | 106.072 | 161.983 | -96.309  | 1.00 | 89.40  | C | C |
| ATOM | 4611 | CG  | ASP | C | 281 | 105.428 | 163.312 | -96.657  | 1.00 | 89.40  | C | C |
| ATOM | 4612 | OD1 | ASP | C | 281 | 105.988 | 164.052 | -97.493  | 1.00 | 89.40  | C | O |
| ATOM | 4613 | OD2 | ASP | C | 281 | 104.357 | 163.618 | -96.092  | 1.00 | 89.40  | C | O |
| ATOM | 4614 | C   | ASP | C | 281 | 108.109 | 162.225 | -97.749  | 1.00 | 89.40  | C | C |
| ATOM | 4615 | O   | ASP | C | 281 | 108.164 | 162.973 | -98.725  | 1.00 | 89.40  | C | O |
| ATOM | 4616 | N   | ASN | C | 282 | 109.106 | 162.092 | -96.881  | 1.00 | 77.30  | C | N |
| ATOM | 4617 | CA  | ASN | C | 282 | 110.349 | 162.843 | -97.018  | 1.00 | 77.30  | C | C |
| ATOM | 4618 | CB  | ASN | C | 282 | 111.245 | 162.621 | -95.798  | 1.00 | 77.30  | C | C |
| ATOM | 4619 | CG  | ASN | C | 282 | 110.595 | 163.079 | -94.506  | 1.00 | 77.30  | C | C |
| ATOM | 4620 | OD1 | ASN | C | 282 | 109.790 | 164.010 | -94.499  | 1.00 | 77.30  | C | O |
| ATOM | 4621 | ND2 | ASN | C | 282 | 110.943 | 162.424 | -93.405  | 1.00 | 77.30  | C | N |
| ATOM | 4622 | C   | ASN | C | 282 | 111.106 | 162.491 | -98.295  | 1.00 | 77.30  | C | C |
| ATOM | 4623 | O   | ASN | C | 282 | 111.332 | 163.348 | -99.150  | 1.00 | 77.30  | C | O |
| ATOM | 4624 | N   | GLU | C | 283 | 111.496 | 161.226 | -98.418  | 1.00 | 247.84 | C | N |
| ATOM | 4625 | CA  | GLU | C | 283 | 112.239 | 160.765 | -99.584  | 1.00 | 247.84 | C | C |
| ATOM | 4626 | CB  | GLU | C | 283 | 113.730 | 160.649 | -99.256  | 1.00 | 247.84 | C | C |
| ATOM | 4627 | CG  | GLU | C | 283 | 114.603 | 160.211 | -100.424 | 1.00 | 247.84 | C | C |
| ATOM | 4628 | CD  | GLU | C | 283 | 114.699 | 161.257 | -101.521 | 1.00 | 247.84 | C | C |
| ATOM | 4629 | OE1 | GLU | C | 283 | 113.657 | 161.829 | -101.903 | 1.00 | 247.84 | C | O |
| ATOM | 4630 | OE2 | GLU | C | 283 | 115.824 | 161.509 | -102.002 | 1.00 | 247.84 | C | O |
| ATOM | 4631 | C   | GLU | C | 283 | 111.705 | 159.430 | -100.094 | 1.00 | 247.84 | C | C |
| ATOM | 4632 | O   | GLU | C | 283 | 111.280 | 158.580 | -99.311  | 1.00 | 247.84 | C | O |
| ATOM | 4633 | N   | ASP | C | 284 | 111.730 | 159.253 | -101.411 | 1.00 | 243.54 | C | N |
| ATOM | 4634 | CA  | ASP | C | 284 | 111.223 | 158.035 | -102.034 | 1.00 | 243.54 | C | C |
| ATOM | 4635 | CB  | ASP | C | 284 | 110.432 | 158.368 | -103.303 | 1.00 | 243.54 | C | C |
| ATOM | 4636 | CG  | ASP | C | 284 | 111.263 | 159.111 | -104.335 | 1.00 | 243.54 | C | C |
| ATOM | 4637 | OD1 | ASP | C | 284 | 112.179 | 159.864 | -103.942 | 1.00 | 243.54 | C | O |
| ATOM | 4638 | OD2 | ASP | C | 284 | 110.998 | 158.941 | -105.544 | 1.00 | 243.54 | C | O |
| ATOM | 4639 | C   | ASP | C | 284 | 112.340 | 157.042 | -102.347 | 1.00 | 243.54 | C | C |
| ATOM | 4640 | O   | ASP | C | 284 | 112.689 | 156.829 | -103.508 | 1.00 | 243.54 | C | O |
| ATOM | 4641 | N   | VAL | C | 285 | 112.896 | 156.434 | -101.304 | 1.00 | 154.00 | C | N |
| ATOM | 4642 | CA  | VAL | C | 285 | 113.945 | 155.434 | -101.468 | 1.00 | 154.00 | C | C |
| ATOM | 4643 | CB  | VAL | C | 285 | 115.185 | 155.766 | -100.617 | 1.00 | 154.00 | C | C |
| ATOM | 4644 | CG1 | VAL | C | 285 | 115.868 | 157.021 | -101.139 | 1.00 | 154.00 | C | C |
| ATOM | 4645 | CG2 | VAL | C | 285 | 114.798 | 155.925 | -99.154  | 1.00 | 154.00 | C | C |
| ATOM | 4646 | C   | VAL | C | 285 | 113.440 | 154.044 | -101.097 | 1.00 | 154.00 | C | C |
| ATOM | 4647 | O   | VAL | C | 285 | 112.249 | 153.851 | -100.853 | 1.00 | 154.00 | C | O |
| ATOM | 4648 | N   | SER | C | 286 | 114.353 | 153.079 | -101.055 | 1.00 | 204.33 | C | N |
| ATOM | 4649 | CA  | SER | C | 286 | 114.000 | 151.705 | -100.719 | 1.00 | 204.33 | C | C |
| ATOM | 4650 | CB  | SER | C | 286 | 113.699 | 150.905 | -101.988 | 1.00 | 204.33 | C | C |
| ATOM | 4651 | OG  | SER | C | 286 | 112.632 | 151.486 | -102.717 | 1.00 | 204.33 | C | O |
| ATOM | 4652 | C   | SER | C | 286 | 115.110 | 151.026 | -99.923  | 1.00 | 204.33 | C | C |
| ATOM | 4653 | O   | SER | C | 286 | 116.293 | 151.208 | -100.210 | 1.00 | 204.33 | C | O |
| ATOM | 4654 | N   | GLY | C | 287 | 114.719 | 150.244 | -98.922  | 1.00 | 74.32  | C | N |
| ATOM | 4655 | CA  | GLY | C | 287 | 115.676 | 149.528 | -98.099  | 1.00 | 74.32  | C | C |
| ATOM | 4656 | C   | GLY | C | 287 | 115.466 | 149.753 | -96.614  | 1.00 | 74.32  | C | C |
| ATOM | 4657 | O   | GLY | C | 287 | 115.593 | 148.827 | -95.813  | 1.00 | 74.32  | C | O |
| ATOM | 4658 | N   | ALA | C | 288 | 115.142 | 150.988 | -96.246  | 1.00 | 54.17  | C | N |
| ATOM | 4659 | CA  | ALA | C | 288 | 114.940 | 151.341 | -94.845  | 1.00 | 54.17  | C | C |
| ATOM | 4660 | CB  | ALA | C | 288 | 115.169 | 152.830 | -94.636  | 1.00 | 54.17  | C | C |
| ATOM | 4661 | C   | ALA | C | 288 | 113.552 | 150.938 | -94.356  | 1.00 | 54.17  | C | C |
| ATOM | 4662 | O   | ALA | C | 288 | 113.419 | 150.194 | -93.385  | 1.00 | 54.17  | C | O |



|      |      |     |     |   |     |         |         |         |            |   |   |
|------|------|-----|-----|---|-----|---------|---------|---------|------------|---|---|
| ATOM | 4663 | N   | PHE | C | 289 | 112.521 | 151.433 | -95.035 | 1.00205.64 | C | N |
| ATOM | 4664 | CA  | PHE | C | 289 | 111.141 | 151.141 | -94.657 | 1.00205.64 | C | C |
| ATOM | 4665 | CB  | PHE | C | 289 | 110.170 | 152.109 | -95.344 | 1.00205.64 | C | C |
| ATOM | 4666 | CG  | PHE | C | 289 | 110.097 | 151.947 | -96.839 | 1.00205.64 | C | C |
| ATOM | 4667 | CD1 | PHE | C | 289 | 111.165 | 151.431 | -97.554 | 1.00205.64 | C | C |
| ATOM | 4668 | CD2 | PHE | C | 289 | 108.954 | 152.316 | -97.528 | 1.00205.64 | C | C |
| ATOM | 4669 | CE1 | PHE | C | 289 | 111.094 | 151.285 | -98.926 | 1.00205.64 | C | C |
| ATOM | 4670 | CE2 | PHE | C | 289 | 108.877 | 152.172 | -98.900 | 1.00205.64 | C | C |
| ATOM | 4671 | CZ  | PHE | C | 289 | 109.948 | 151.657 | -99.600 | 1.00205.64 | C | C |
| ATOM | 4672 | C   | PHE | C | 289 | 110.756 | 149.696 | -94.963 | 1.00205.64 | C | C |
| ATOM | 4673 | O   | PHE | C | 289 | 109.658 | 149.253 | -94.625 | 1.00205.64 | C | O |
| ATOM | 4674 | N   | VAL | C | 290 | 111.664 | 148.969 | -95.605 | 1.00 43.82 | C | N |
| ATOM | 4675 | CA  | VAL | C | 290 | 111.429 | 147.568 | -95.933 | 1.00 43.82 | C | C |
| ATOM | 4676 | CB  | VAL | C | 290 | 112.431 | 147.060 | -96.987 | 1.00 43.82 | C | C |
| ATOM | 4677 | CG1 | VAL | C | 290 | 112.200 | 145.585 | -97.276 | 1.00 43.82 | C | C |
| ATOM | 4678 | CG2 | VAL | C | 290 | 112.320 | 147.882 | -98.263 | 1.00 43.82 | C | C |
| ATOM | 4679 | C   | VAL | C | 290 | 111.526 | 146.699 | -94.683 | 1.00 43.82 | C | C |
| ATOM | 4680 | O   | VAL | C | 290 | 110.780 | 145.731 | -94.527 | 1.00 43.82 | C | O |
| ATOM | 4681 | N   | THR | C | 291 | 112.448 | 147.053 | -93.794 | 1.00 50.43 | C | N |
| ATOM | 4682 | CA  | THR | C | 291 | 112.643 | 146.313 | -92.554 | 1.00 50.43 | C | C |
| ATOM | 4683 | CB  | THR | C | 291 | 113.928 | 146.756 | -91.827 | 1.00 50.43 | C | C |
| ATOM | 4684 | OG1 | THR | C | 291 | 115.053 | 146.596 | -92.700 | 1.00 50.43 | C | O |
| ATOM | 4685 | CG2 | THR | C | 291 | 114.144 | 145.928 | -90.570 | 1.00 50.43 | C | C |
| ATOM | 4686 | C   | THR | C | 291 | 111.450 | 146.484 | -91.617 | 1.00 50.43 | C | C |
| ATOM | 4687 | O   | THR | C | 291 | 111.041 | 145.540 | -90.941 | 1.00 50.43 | C | O |
| ATOM | 4688 | N   | LEU | C | 292 | 110.897 | 147.692 | -91.583 | 1.00 89.67 | C | N |
| ATOM | 4689 | CA  | LEU | C | 292 | 109.746 | 147.987 | -90.736 | 1.00 89.67 | C | C |
| ATOM | 4690 | CB  | LEU | C | 292 | 109.399 | 149.478 | -90.788 | 1.00 89.67 | C | C |
| ATOM | 4691 | CG  | LEU | C | 292 | 110.327 | 150.455 | -90.060 | 1.00 89.67 | C | C |
| ATOM | 4692 | CD1 | LEU | C | 292 | 110.414 | 150.107 | -88.580 | 1.00 89.67 | C | C |
| ATOM | 4693 | CD2 | LEU | C | 292 | 111.711 | 150.485 | -90.690 | 1.00 89.67 | C | C |
| ATOM | 4694 | C   | LEU | C | 292 | 108.533 | 147.154 | -91.139 | 1.00 89.67 | C | C |
| ATOM | 4695 | O   | LEU | C | 292 | 107.660 | 146.873 | -90.318 | 1.00 89.67 | C | O |
| ATOM | 4696 | N   | ARG | C | 293 | 108.486 | 146.765 | -92.409 | 1.00153.52 | C | N |
| ATOM | 4697 | CA  | ARG | C | 293 | 107.396 | 145.943 | -92.919 | 1.00153.52 | C | C |
| ATOM | 4698 | CB  | ARG | C | 293 | 107.545 | 145.743 | -94.430 | 1.00153.52 | C | C |
| ATOM | 4699 | CG  | ARG | C | 293 | 106.271 | 145.314 | -95.149 | 1.00153.52 | C | C |
| ATOM | 4700 | CD  | ARG | C | 293 | 105.898 | 143.874 | -94.839 | 1.00153.52 | C | C |
| ATOM | 4701 | NE  | ARG | C | 293 | 104.697 | 143.453 | -95.554 | 1.00153.52 | C | N |
| ATOM | 4702 | CZ  | ARG | C | 293 | 104.128 | 142.260 | -95.419 | 1.00153.52 | C | C |
| ATOM | 4703 | NH1 | ARG | C | 293 | 104.650 | 141.366 | -94.591 | 1.00153.52 | C | N |
| ATOM | 4704 | NH2 | ARG | C | 293 | 103.037 | 141.961 | -96.110 | 1.00153.52 | C | N |
| ATOM | 4705 | C   | ARG | C | 293 | 107.384 | 144.598 | -92.199 | 1.00153.52 | C | C |
| ATOM | 4706 | O   | ARG | C | 293 | 106.326 | 144.092 | -91.824 | 1.00153.52 | C | O |
| ATOM | 4707 | N   | VAL | C | 294 | 108.569 | 144.028 | -92.006 | 1.00148.57 | C | N |
| ATOM | 4708 | CA  | VAL | C | 294 | 108.705 | 142.752 | -91.314 | 1.00148.57 | C | C |
| ATOM | 4709 | CB  | VAL | C | 294 | 110.157 | 142.240 | -91.362 | 1.00148.57 | C | C |
| ATOM | 4710 | CG1 | VAL | C | 294 | 110.272 | 140.899 | -90.656 | 1.00148.57 | C | C |
| ATOM | 4711 | CG2 | VAL | C | 294 | 110.634 | 142.132 | -92.802 | 1.00148.57 | C | C |
| ATOM | 4712 | C   | VAL | C | 294 | 108.260 | 142.870 | -89.859 | 1.00148.57 | C | C |
| ATOM | 4713 | O   | VAL | C | 294 | 107.730 | 141.920 | -89.282 | 1.00148.57 | C | O |
| ATOM | 4714 | N   | PHE | C | 295 | 108.475 | 144.044 | -89.274 | 1.00171.25 | C | N |
| ATOM | 4715 | CA  | PHE | C | 295 | 108.100 | 144.289 | -87.886 | 1.00171.25 | C | C |
| ATOM | 4716 | CB  | PHE | C | 295 | 108.725 | 145.592 | -87.382 | 1.00171.25 | C | C |
| ATOM | 4717 | CG  | PHE | C | 295 | 110.226 | 145.565 | -87.332 | 1.00171.25 | C | C |
| ATOM | 4718 | CD1 | PHE | C | 295 | 110.910 | 144.362 | -87.300 | 1.00171.25 | C | C |
| ATOM | 4719 | CD2 | PHE | C | 295 | 110.953 | 146.744 | -87.316 | 1.00171.25 | C | C |
| ATOM | 4720 | CE1 | PHE | C | 295 | 112.291 | 144.334 | -87.254 | 1.00171.25 | C | C |
| ATOM | 4721 | CE2 | PHE | C | 295 | 112.334 | 146.723 | -87.270 | 1.00171.25 | C | C |
| ATOM | 4722 | CZ  | PHE | C | 295 | 113.003 | 145.516 | -87.238 | 1.00171.25 | C | C |
| ATOM | 4723 | C   | PHE | C | 295 | 106.585 | 144.333 | -87.711 | 1.00171.25 | C | C |
| ATOM | 4724 | O   | PHE | C | 295 | 106.079 | 144.281 | -86.591 | 1.00171.25 | C | O |
| ATOM | 4725 | N   | ARG | C | 296 | 105.867 | 144.429 | -88.825 | 1.00159.61 | C | N |
| ATOM | 4726 | CA  | ARG | C | 296 | 104.409 | 144.462 | -88.794 | 1.00159.61 | C | C |
| ATOM | 4727 | CB  | ARG | C | 296 | 103.856 | 144.982 | -90.122 | 1.00159.61 | C | C |
| ATOM | 4728 | CG  | ARG | C | 296 | 104.303 | 146.392 | -90.472 | 1.00159.61 | C | C |
| ATOM | 4729 | CD  | ARG | C | 296 | 103.745 | 146.839 | -91.814 | 1.00159.61 | C | C |
| ATOM | 4730 | NE  | ARG | C | 296 | 102.285 | 146.867 | -91.824 | 1.00159.61 | C | N |

|      |      |     |     |   |     |         |         |         |            |   |   |
|------|------|-----|-----|---|-----|---------|---------|---------|------------|---|---|
| ATOM | 4731 | CZ  | ARG | C | 296 | 101.520 | 145.878 | -92.275 | 1.00159.61 | C | C |
| ATOM | 4732 | NH1 | ARG | C | 296 | 102.075 | 144.775 | -92.759 | 1.00159.61 | C | N |
| ATOM | 4733 | NH2 | ARG | C | 296 | 100.200 | 145.992 | -92.245 | 1.00159.61 | C | N |
| ATOM | 4734 | C   | ARG | C | 296 | 103.836 | 143.082 | -88.489 | 1.00159.61 | C | C |
| ATOM | 4735 | O   | ARG | C | 296 | 102.629 | 142.928 | -88.300 | 1.00159.61 | C | O |
| ATOM | 4736 | N   | VAL | C | 297 | 104.708 | 142.081 | -88.445 | 1.00167.62 | C | N |
| ATOM | 4737 | CA  | VAL | C | 297 | 104.296 | 140.716 | -88.145 | 1.00167.62 | C | C |
| ATOM | 4738 | CB  | VAL | C | 297 | 105.240 | 139.688 | -88.801 | 1.00167.62 | C | C |
| ATOM | 4739 | CG1 | VAL | C | 297 | 104.743 | 138.271 | -88.556 | 1.00167.62 | C | C |
| ATOM | 4740 | CG2 | VAL | C | 297 | 105.363 | 139.960 | -90.292 | 1.00167.62 | C | C |
| ATOM | 4741 | C   | VAL | C | 297 | 104.264 | 140.488 | -86.637 | 1.00167.62 | C | C |
| ATOM | 4742 | O   | VAL | C | 297 | 103.619 | 139.559 | -86.150 | 1.00167.62 | C | O |
| ATOM | 4743 | N   | PHE | C | 298 | 104.957 | 141.350 | -85.901 | 1.00121.45 | C | N |
| ATOM | 4744 | CA  | PHE | C | 298 | 105.032 | 141.234 | -84.449 | 1.00121.45 | C | C |
| ATOM | 4745 | CB  | PHE | C | 298 | 106.169 | 142.099 | -83.899 | 1.00121.45 | C | C |
| ATOM | 4746 | CG  | PHE | C | 298 | 107.534 | 141.664 | -84.352 | 1.00121.45 | C | C |
| ATOM | 4747 | CD1 | PHE | C | 298 | 107.747 | 140.379 | -84.821 | 1.00121.45 | C | C |
| ATOM | 4748 | CD2 | PHE | C | 298 | 108.605 | 142.541 | -84.306 | 1.00121.45 | C | C |
| ATOM | 4749 | CE1 | PHE | C | 298 | 109.002 | 139.976 | -85.238 | 1.00121.45 | C | C |
| ATOM | 4750 | CE2 | PHE | C | 298 | 109.862 | 142.144 | -84.721 | 1.00121.45 | C | C |
| ATOM | 4751 | CZ  | PHE | C | 298 | 110.061 | 140.860 | -85.188 | 1.00121.45 | C | C |
| ATOM | 4752 | C   | PHE | C | 298 | 103.716 | 141.605 | -83.772 | 1.00121.45 | C | C |
| ATOM | 4753 | O   | PHE | C | 298 | 103.619 | 141.606 | -82.545 | 1.00121.45 | C | O |
| ATOM | 4754 | N   | ARG | C | 299 | 102.705 | 141.920 | -84.575 | 1.00168.10 | C | N |
| ATOM | 4755 | CA  | ARG | C | 299 | 101.389 | 142.260 | -84.047 | 1.00168.10 | C | C |
| ATOM | 4756 | CB  | ARG | C | 299 | 100.539 | 142.948 | -85.117 | 1.00168.10 | C | C |
| ATOM | 4757 | CG  | ARG | C | 299 | 100.275 | 142.093 | -86.345 | 1.00168.10 | C | C |
| ATOM | 4758 | CD  | ARG | C | 299 | 99.450  | 142.849 | -87.375 | 1.00168.10 | C | C |
| ATOM | 4759 | NE  | ARG | C | 299 | 100.106 | 144.082 | -87.798 | 1.00168.10 | C | N |
| ATOM | 4760 | CZ  | ARG | C | 299 | 99.622  | 144.909 | -88.719 | 1.00168.10 | C | C |
| ATOM | 4761 | NH1 | ARG | C | 299 | 98.472  | 144.635 | -89.321 | 1.00168.10 | C | N |
| ATOM | 4762 | NH2 | ARG | C | 299 | 100.288 | 146.009 | -89.041 | 1.00168.10 | C | N |
| ATOM | 4763 | C   | ARG | C | 299 | 100.677 | 141.016 | -83.527 | 1.00168.10 | C | C |
| ATOM | 4764 | O   | ARG | C | 299 | 99.629  | 141.109 | -82.887 | 1.00168.10 | C | O |
| ATOM | 4765 | N   | ILE | C | 300 | 101.253 | 139.852 | -83.809 | 1.00203.46 | C | N |
| ATOM | 4766 | CA  | ILE | C | 300 | 100.694 | 138.585 | -83.356 | 1.00203.46 | C | C |
| ATOM | 4767 | CB  | ILE | C | 300 | 101.215 | 137.408 | -84.201 | 1.00203.46 | C | C |
| ATOM | 4768 | CG2 | ILE | C | 300 | 100.522 | 136.114 | -83.802 | 1.00203.46 | C | C |
| ATOM | 4769 | CG1 | ILE | C | 300 | 101.012 | 137.693 | -85.690 | 1.00203.46 | C | C |
| ATOM | 4770 | CD1 | ILE | C | 300 | 101.537 | 136.605 | -86.597 | 1.00203.46 | C | C |
| ATOM | 4771 | C   | ILE | C | 300 | 101.034 | 138.344 | -81.889 | 1.00203.46 | C | C |
| ATOM | 4772 | O   | ILE | C | 300 | 100.342 | 137.601 | -81.193 | 1.00203.46 | C | O |
| ATOM | 4773 | N   | PHE | C | 301 | 102.103 | 138.981 | -81.424 | 1.00106.14 | C | N |
| ATOM | 4774 | CA  | PHE | C | 301 | 102.526 | 138.857 | -80.034 | 1.00106.14 | C | C |
| ATOM | 4775 | CB  | PHE | C | 301 | 103.959 | 139.365 | -79.860 | 1.00106.14 | C | C |
| ATOM | 4776 | CG  | PHE | C | 301 | 104.986 | 138.543 | -80.585 | 1.00106.14 | C | C |
| ATOM | 4777 | CD1 | PHE | C | 301 | 104.729 | 137.223 | -80.914 | 1.00106.14 | C | C |
| ATOM | 4778 | CD2 | PHE | C | 301 | 106.209 | 139.090 | -80.936 | 1.00106.14 | C | C |
| ATOM | 4779 | CE1 | PHE | C | 301 | 105.671 | 136.465 | -81.580 | 1.00106.14 | C | C |
| ATOM | 4780 | CE2 | PHE | C | 301 | 107.156 | 138.336 | -81.603 | 1.00106.14 | C | C |
| ATOM | 4781 | CZ  | PHE | C | 301 | 106.886 | 137.022 | -81.925 | 1.00106.14 | C | C |
| ATOM | 4782 | C   | PHE | C | 301 | 101.587 | 139.615 | -79.101 | 1.00106.14 | C | C |
| ATOM | 4783 | O   | PHE | C | 301 | 101.829 | 139.698 | -77.897 | 1.00106.14 | C | O |
| ATOM | 4784 | N   | LYS | C | 302 | 100.516 | 140.166 | -79.663 | 1.00168.00 | C | N |
| ATOM | 4785 | CA  | LYS | C | 302 | 99.548  | 140.926 | -78.881 | 1.00168.00 | C | C |
| ATOM | 4786 | CB  | LYS | C | 302 | 98.800  | 141.918 | -79.775 | 1.00168.00 | C | C |
| ATOM | 4787 | CG  | LYS | C | 302 | 97.961  | 142.933 | -79.016 | 1.00168.00 | C | C |
| ATOM | 4788 | CD  | LYS | C | 302 | 97.321  | 143.938 | -79.960 | 1.00168.00 | C | C |
| ATOM | 4789 | CE  | LYS | C | 302 | 98.369  | 144.700 | -80.754 | 1.00168.00 | C | C |
| ATOM | 4790 | NZ  | LYS | C | 302 | 99.282  | 145.475 | -79.871 | 1.00168.00 | C | N |
| ATOM | 4791 | C   | LYS | C | 302 | 98.566  | 139.993 | -78.177 | 1.00168.00 | C | C |
| ATOM | 4792 | O   | LYS | C | 302 | 97.852  | 140.404 | -77.262 | 1.00168.00 | C | O |
| ATOM | 4793 | N   | PHE | C | 303 | 98.538  | 138.736 | -78.607 | 1.00 83.96 | C | N |
| ATOM | 4794 | CA  | PHE | C | 303 | 97.678  | 137.735 | -77.986 | 1.00 83.96 | C | C |
| ATOM | 4795 | CB  | PHE | C | 303 | 97.570  | 136.488 | -78.867 | 1.00 83.96 | C | C |
| ATOM | 4796 | CG  | PHE | C | 303 | 96.786  | 136.701 | -80.131 | 1.00 83.96 | C | C |
| ATOM | 4797 | CD1 | PHE | C | 303 | 95.402  | 136.683 | -80.113 | 1.00 83.96 | C | C |
| ATOM | 4798 | CD2 | PHE | C | 303 | 97.434  | 136.909 | -81.337 | 1.00 83.96 | C | C |

|      |      |     |     |   |     |         |         |         |      |        |   |   |
|------|------|-----|-----|---|-----|---------|---------|---------|------|--------|---|---|
| ATOM | 4799 | CE1 | PHE | C | 303 | 94.678  | 136.876 | -81.274 | 1.00 | 83.96  | C | C |
| ATOM | 4800 | CE2 | PHE | C | 303 | 96.715  | 137.101 | -82.501 | 1.00 | 83.96  | C | C |
| ATOM | 4801 | CZ  | PHE | C | 303 | 95.335  | 137.085 | -82.470 | 1.00 | 83.96  | C | C |
| ATOM | 4802 | C   | PHE | C | 303 | 98.195  | 137.349 | -76.604 | 1.00 | 83.96  | C | C |
| ATOM | 4803 | O   | PHE | C | 303 | 97.504  | 136.676 | -75.840 | 1.00 | 83.96  | C | O |
| ATOM | 4804 | N   | SER | C | 304 | 99.414  | 137.777 | -76.291 | 1.00 | 64.30  | C | N |
| ATOM | 4805 | CA  | SER | C | 304 | 100.025 | 137.476 | -75.001 | 1.00 | 64.30  | C | C |
| ATOM | 4806 | CB  | SER | C | 304 | 101.483 | 137.939 | -74.978 | 1.00 | 64.30  | C | C |
| ATOM | 4807 | OG  | SER | C | 304 | 101.577 | 139.340 | -75.168 | 1.00 | 64.30  | C | O |
| ATOM | 4808 | C   | SER | C | 304 | 99.251  | 138.126 | -73.860 | 1.00 | 64.30  | C | C |
| ATOM | 4809 | O   | SER | C | 304 | 99.276  | 137.647 | -72.727 | 1.00 | 64.30  | C | O |
| ATOM | 4810 | N   | ARG | C | 305 | 98.562  | 139.220 | -74.168 | 1.00 | 148.97 | C | N |
| ATOM | 4811 | CA  | ARG | C | 305 | 97.769  | 139.931 | -73.174 | 1.00 | 148.97 | C | N |
| ATOM | 4812 | CB  | ARG | C | 305 | 97.585  | 141.393 | -73.585 | 1.00 | 148.97 | C | C |
| ATOM | 4813 | CG  | ARG | C | 305 | 96.958  | 142.271 | -72.514 | 1.00 | 148.97 | C | C |
| ATOM | 4814 | CD  | ARG | C | 305 | 96.856  | 143.714 | -72.977 | 1.00 | 148.97 | C | C |
| ATOM | 4815 | NE  | ARG | C | 305 | 96.319  | 144.586 | -71.936 | 1.00 | 148.97 | C | N |
| ATOM | 4816 | CZ  | ARG | C | 305 | 97.064  | 145.221 | -71.037 | 1.00 | 148.97 | C | N |
| ATOM | 4817 | NH1 | ARG | C | 305 | 98.383  | 145.083 | -71.049 | 1.00 | 148.97 | C | N |
| ATOM | 4818 | NH2 | ARG | C | 305 | 96.491  | 145.995 | -70.126 | 1.00 | 148.97 | C | N |
| ATOM | 4819 | C   | ARG | C | 305 | 96.413  | 139.257 | -72.990 | 1.00 | 148.97 | C | C |
| ATOM | 4820 | O   | ARG | C | 305 | 95.683  | 139.551 | -72.044 | 1.00 | 148.97 | C | O |
| ATOM | 4821 | N   | HIS | C | 306 | 96.085  | 138.347 | -73.902 | 1.00 | 99.22  | C | N |
| ATOM | 4822 | CA  | HIS | C | 306 | 94.820  | 137.625 | -73.846 | 1.00 | 99.22  | C | C |
| ATOM | 4823 | ND1 | HIS | C | 306 | 94.863  | 139.822 | -76.117 | 1.00 | 99.22  | C | N |
| ATOM | 4824 | CG  | HIS | C | 306 | 93.881  | 138.899 | -75.826 | 1.00 | 99.22  | C | C |
| ATOM | 4825 | CB  | HIS | C | 306 | 94.182  | 137.558 | -75.234 | 1.00 | 99.22  | C | C |
| ATOM | 4826 | NE2 | HIS | C | 306 | 93.000  | 140.722 | -76.675 | 1.00 | 99.22  | C | N |
| ATOM | 4827 | CD2 | HIS | C | 306 | 92.707  | 139.475 | -76.181 | 1.00 | 99.22  | C | C |
| ATOM | 4828 | CE1 | HIS | C | 306 | 94.307  | 140.907 | -76.625 | 1.00 | 99.22  | C | C |
| ATOM | 4829 | C   | HIS | C | 306 | 95.012  | 136.219 | -73.289 | 1.00 | 99.22  | C | C |
| ATOM | 4830 | O   | HIS | C | 306 | 94.406  | 135.851 | -72.283 | 1.00 | 99.22  | C | O |
| ATOM | 4831 | N   | SER | C | 307 | 95.857  | 135.436 | -73.951 | 1.00 | 102.77 | C | N |
| ATOM | 4832 | CA  | SER | C | 307 | 96.132  | 134.070 | -73.524 | 1.00 | 102.77 | C | C |
| ATOM | 4833 | CB  | SER | C | 307 | 96.467  | 133.189 | -74.729 | 1.00 | 102.77 | C | C |
| ATOM | 4834 | OG  | SER | C | 307 | 95.392  | 133.158 | -75.652 | 1.00 | 102.77 | C | O |
| ATOM | 4835 | C   | SER | C | 307 | 97.271  | 134.029 | -72.510 | 1.00 | 102.77 | C | C |
| ATOM | 4836 | O   | SER | C | 307 | 98.119  | 134.920 | -72.477 | 1.00 | 102.77 | C | O |
| ATOM | 4837 | N   | GLN | C | 308 | 97.283  | 132.988 | -71.684 | 1.00 | 121.93 | C | N |
| ATOM | 4838 | CA  | GLN | C | 308 | 98.304  | 132.836 | -70.654 | 1.00 | 121.93 | C | C |
| ATOM | 4839 | CB  | GLN | C | 308 | 97.689  | 132.265 | -69.375 | 1.00 | 121.93 | C | C |
| ATOM | 4840 | CG  | GLN | C | 308 | 96.527  | 133.079 | -68.829 | 1.00 | 121.93 | C | C |
| ATOM | 4841 | CD  | GLN | C | 308 | 96.937  | 134.479 | -68.416 | 1.00 | 121.93 | C | C |
| ATOM | 4842 | OE1 | GLN | C | 308 | 97.907  | 134.663 | -67.681 | 1.00 | 121.93 | C | O |
| ATOM | 4843 | NE2 | GLN | C | 308 | 96.202  | 135.477 | -68.893 | 1.00 | 121.93 | C | N |
| ATOM | 4844 | C   | GLN | C | 308 | 99.439  | 131.937 | -71.134 | 1.00 | 121.93 | C | C |
| ATOM | 4845 | O   | GLN | C | 308 | 100.401 | 131.693 | -70.404 | 1.00 | 121.93 | C | O |
| ATOM | 4846 | N   | GLY | C | 309 | 99.320  | 131.446 | -72.363 | 1.00 | 30.52  | C | N |
| ATOM | 4847 | CA  | GLY | C | 309 | 100.330 | 130.578 | -72.940 | 1.00 | 30.52  | C | C |
| ATOM | 4848 | C   | GLY | C | 309 | 101.598 | 131.322 | -73.312 | 1.00 | 30.52  | C | C |
| ATOM | 4849 | O   | GLY | C | 309 | 102.704 | 130.842 | -73.067 | 1.00 | 30.52  | C | O |
| ATOM | 4850 | N   | LEU | C | 310 | 101.435 | 132.500 | -73.906 | 1.00 | 101.35 | C | N |
| ATOM | 4851 | CA  | LEU | C | 310 | 102.574 | 133.317 | -74.311 | 1.00 | 101.35 | C | C |
| ATOM | 4852 | CB  | LEU | C | 310 | 102.139 | 134.393 | -75.307 | 1.00 | 101.35 | C | C |
| ATOM | 4853 | CG  | LEU | C | 310 | 101.549 | 133.893 | -76.627 | 1.00 | 101.35 | C | C |
| ATOM | 4854 | CD1 | LEU | C | 310 | 101.108 | 135.063 | -77.492 | 1.00 | 101.35 | C | C |
| ATOM | 4855 | CD2 | LEU | C | 310 | 102.552 | 133.021 | -77.367 | 1.00 | 101.35 | C | C |
| ATOM | 4856 | C   | LEU | C | 310 | 103.248 | 133.961 | -73.105 | 1.00 | 101.35 | C | C |
| ATOM | 4857 | O   | LEU | C | 310 | 104.427 | 134.311 | -73.155 | 1.00 | 101.35 | C | O |
| ATOM | 4858 | N   | ARG | C | 311 | 102.493 | 134.116 | -72.022 | 1.00 | 108.34 | C | N |
| ATOM | 4859 | CA  | ARG | C | 311 | 103.031 | 134.688 | -70.795 | 1.00 | 108.34 | C | C |
| ATOM | 4860 | CB  | ARG | C | 311 | 101.904 | 135.019 | -69.814 | 1.00 | 108.34 | C | C |
| ATOM | 4861 | CG  | ARG | C | 311 | 100.960 | 136.109 | -70.294 | 1.00 | 108.34 | C | C |
| ATOM | 4862 | CD  | ARG | C | 311 | 99.906  | 136.420 | -69.245 | 1.00 | 108.34 | C | C |
| ATOM | 4863 | NE  | ARG | C | 311 | 100.504 | 136.802 | -67.969 | 1.00 | 108.34 | C | N |
| ATOM | 4864 | CZ  | ARG | C | 311 | 100.770 | 138.054 | -67.614 | 1.00 | 108.34 | C | C |
| ATOM | 4865 | NH1 | ARG | C | 311 | 100.489 | 139.054 | -68.438 | 1.00 | 108.34 | C | N |
| ATOM | 4866 | NH2 | ARG | C | 311 | 101.317 | 138.309 | -66.433 | 1.00 | 108.34 | C | N |

|      |      |     |     |   |     |         |         |         |      |        |   |   |
|------|------|-----|-----|---|-----|---------|---------|---------|------|--------|---|---|
| ATOM | 4867 | C   | ARG | C | 311 | 104.032 | 133.740 | -70.144 | 1.00 | 108.34 | C | C |
| ATOM | 4868 | O   | ARG | C | 311 | 105.115 | 134.154 | -69.732 | 1.00 | 108.34 | C | O |
| ATOM | 4869 | N   | ILE | C | 312 | 103.662 | 132.466 | -70.056 | 1.00 | 41.79  | C | N |
| ATOM | 4870 | CA  | ILE | C | 312 | 104.532 | 131.457 | -69.466 | 1.00 | 41.79  | C | C |
| ATOM | 4871 | CB  | ILE | C | 312 | 103.787 | 130.128 | -69.241 | 1.00 | 41.79  | C | C |
| ATOM | 4872 | CG2 | ILE | C | 312 | 104.714 | 129.097 | -68.615 | 1.00 | 41.79  | C | C |
| ATOM | 4873 | CG1 | ILE | C | 312 | 102.556 | 130.349 | -68.360 | 1.00 | 41.79  | C | C |
| ATOM | 4874 | CD1 | ILE | C | 312 | 101.759 | 129.091 | -68.097 | 1.00 | 41.79  | C | C |
| ATOM | 4875 | C   | ILE | C | 312 | 105.749 | 131.205 | -70.350 | 1.00 | 41.79  | C | C |
| ATOM | 4876 | O   | ILE | C | 312 | 106.877 | 131.133 | -69.863 | 1.00 | 41.79  | C | O |
| ATOM | 4877 | N   | LEU | C | 313 | 105.511 | 131.072 | -71.651 | 1.00 | 49.07  | C | N |
| ATOM | 4878 | CA  | LEU | C | 313 | 106.586 | 130.846 | -72.610 | 1.00 | 49.07  | C | C |
| ATOM | 4879 | CB  | LEU | C | 313 | 106.012 | 130.595 | -74.006 | 1.00 | 49.07  | C | C |
| ATOM | 4880 | CG  | LEU | C | 313 | 107.025 | 130.332 | -75.122 | 1.00 | 49.07  | C | C |
| ATOM | 4881 | CD1 | LEU | C | 313 | 107.903 | 129.139 | -74.779 | 1.00 | 49.07  | C | C |
| ATOM | 4882 | CD2 | LEU | C | 313 | 106.318 | 130.117 | -76.451 | 1.00 | 49.07  | C | C |
| ATOM | 4883 | C   | LEU | C | 313 | 107.548 | 132.028 | -72.643 | 1.00 | 49.07  | C | C |
| ATOM | 4884 | O   | LEU | C | 313 | 108.752 | 131.856 | -72.829 | 1.00 | 49.07  | C | O |
| ATOM | 4885 | N   | GLY | C | 314 | 107.008 | 133.229 | -72.461 | 1.00 | 27.86  | C | N |
| ATOM | 4886 | CA  | GLY | C | 314 | 107.813 | 134.436 | -72.460 | 1.00 | 27.86  | C | C |
| ATOM | 4887 | C   | GLY | C | 314 | 108.741 | 134.509 | -71.264 | 1.00 | 27.86  | C | C |
| ATOM | 4888 | O   | GLY | C | 314 | 109.908 | 134.880 | -71.392 | 1.00 | 27.86  | C | O |
| ATOM | 4889 | N   | TYR | C | 315 | 108.220 | 134.150 | -70.095 | 1.00 | 99.30  | C | N |
| ATOM | 4890 | CA  | TYR | C | 315 | 109.007 | 134.164 | -68.868 | 1.00 | 99.30  | C | C |
| ATOM | 4891 | CB  | TYR | C | 315 | 108.095 | 134.064 | -67.643 | 1.00 | 99.30  | C | C |
| ATOM | 4892 | CG  | TYR | C | 315 | 107.131 | 135.220 | -67.504 | 1.00 | 99.30  | C | C |
| ATOM | 4893 | CD1 | TYR | C | 315 | 105.964 | 135.091 | -66.762 | 1.00 | 99.30  | C | C |
| ATOM | 4894 | CD2 | TYR | C | 315 | 107.388 | 136.440 | -68.115 | 1.00 | 99.30  | C | C |
| ATOM | 4895 | CE1 | TYR | C | 315 | 105.080 | 136.145 | -66.633 | 1.00 | 99.30  | C | C |
| ATOM | 4896 | CE2 | TYR | C | 315 | 106.510 | 137.499 | -67.991 | 1.00 | 99.30  | C | C |
| ATOM | 4897 | CZ  | TYR | C | 315 | 105.358 | 137.346 | -67.249 | 1.00 | 99.30  | C | C |
| ATOM | 4898 | OH  | TYR | C | 315 | 104.481 | 138.399 | -67.124 | 1.00 | 99.30  | C | O |
| ATOM | 4899 | C   | TYR | C | 315 | 110.027 | 133.031 | -68.856 | 1.00 | 99.30  | C | C |
| ATOM | 4900 | O   | TYR | C | 315 | 111.081 | 133.138 | -68.229 | 1.00 | 99.30  | C | O |
| ATOM | 4901 | N   | THR | C | 316 | 109.706 | 131.946 | -69.554 | 1.00 | 115.27 | C | N |
| ATOM | 4902 | CA  | THR | C | 316 | 110.603 | 130.800 | -69.638 | 1.00 | 115.27 | C | C |
| ATOM | 4903 | CB  | THR | C | 316 | 109.897 | 129.571 | -70.242 | 1.00 | 115.27 | C | C |
| ATOM | 4904 | OG1 | THR | C | 316 | 108.793 | 129.194 | -69.410 | 1.00 | 115.27 | C | O |
| ATOM | 4905 | CG2 | THR | C | 316 | 110.863 | 128.403 | -70.353 | 1.00 | 115.27 | C | C |
| ATOM | 4906 | C   | THR | C | 316 | 111.835 | 131.131 | -70.473 | 1.00 | 115.27 | C | C |
| ATOM | 4907 | O   | THR | C | 316 | 112.963 | 130.858 | -70.065 | 1.00 | 115.27 | C | O |
| ATOM | 4908 | N   | LEU | C | 317 | 111.611 | 131.723 | -71.641 | 1.00 | 53.09  | C | N |
| ATOM | 4909 | CA  | LEU | C | 317 | 112.704 | 132.106 | -72.528 | 1.00 | 53.09  | C | C |
| ATOM | 4910 | CB  | LEU | C | 317 | 112.166 | 132.500 | -73.905 | 1.00 | 53.09  | C | C |
| ATOM | 4911 | CG  | LEU | C | 317 | 111.414 | 131.415 | -74.679 | 1.00 | 53.09  | C | C |
| ATOM | 4912 | CD1 | LEU | C | 317 | 110.881 | 131.963 | -75.995 | 1.00 | 53.09  | C | C |
| ATOM | 4913 | CD2 | LEU | C | 317 | 112.308 | 130.208 | -74.920 | 1.00 | 53.09  | C | C |
| ATOM | 4914 | C   | LEU | C | 317 | 113.517 | 133.250 | -71.931 | 1.00 | 53.09  | C | C |
| ATOM | 4915 | O   | LEU | C | 317 | 114.701 | 133.405 | -72.230 | 1.00 | 53.09  | C | O |
| ATOM | 4916 | N   | LYS | C | 318 | 112.873 | 134.051 | -71.088 | 1.00 | 75.11  | C | N |
| ATOM | 4917 | CA  | LYS | C | 318 | 113.542 | 135.165 | -70.428 | 1.00 | 75.11  | C | C |
| ATOM | 4918 | CB  | LYS | C | 318 | 112.517 | 136.130 | -69.831 | 1.00 | 75.11  | C | C |
| ATOM | 4919 | CG  | LYS | C | 318 | 113.133 | 137.325 | -69.121 | 1.00 | 75.11  | C | C |
| ATOM | 4920 | CD  | LYS | C | 318 | 112.063 | 138.232 | -68.538 | 1.00 | 75.11  | C | C |
| ATOM | 4921 | CE  | LYS | C | 318 | 111.142 | 138.766 | -69.622 | 1.00 | 75.11  | C | C |
| ATOM | 4922 | NZ  | LYS | C | 318 | 110.084 | 139.651 | -69.061 | 1.00 | 75.11  | C | N |
| ATOM | 4923 | C   | LYS | C | 318 | 114.486 | 134.665 | -69.340 | 1.00 | 75.11  | C | C |
| ATOM | 4924 | O   | LYS | C | 318 | 115.644 | 135.078 | -69.272 | 1.00 | 75.11  | C | O |
| ATOM | 4925 | N   | SER | C | 319 | 113.984 | 133.774 | -68.491 | 1.00 | 82.79  | C | N |
| ATOM | 4926 | CA  | SER | C | 319 | 114.789 | 133.198 | -67.421 | 1.00 | 82.79  | C | C |
| ATOM | 4927 | CB  | SER | C | 319 | 113.903 | 132.426 | -66.441 | 1.00 | 82.79  | C | C |
| ATOM | 4928 | OG  | SER | C | 319 | 114.677 | 131.839 | -65.409 | 1.00 | 82.79  | C | O |
| ATOM | 4929 | C   | SER | C | 319 | 115.869 | 132.281 | -67.984 | 1.00 | 82.79  | C | C |
| ATOM | 4930 | O   | SER | C | 319 | 116.911 | 132.076 | -67.360 | 1.00 | 82.79  | C | O |
| ATOM | 4931 | N   | CYS | C | 320 | 115.613 | 131.733 | -69.167 | 1.00 | 91.34  | C | N |
| ATOM | 4932 | CA  | CYS | C | 320 | 116.565 | 130.845 | -69.824 | 1.00 | 91.34  | C | C |
| ATOM | 4933 | CB  | CYS | C | 320 | 115.855 | 129.604 | -70.367 | 1.00 | 91.34  | C | C |
| ATOM | 4934 | SG  | CYS | C | 320 | 115.026 | 128.605 | -69.109 | 1.00 | 91.34  | C | S |

|      |      |     |     |   |     |         |         |         |      |        |   |   |
|------|------|-----|-----|---|-----|---------|---------|---------|------|--------|---|---|
| ATOM | 4935 | C   | CYS | C | 320 | 117.296 | 131.565 | -70.951 | 1.00 | 91.34  | C | C |
| ATOM | 4936 | O   | CYS | C | 320 | 117.676 | 130.952 | -71.948 | 1.00 | 91.34  | C | O |
| ATOM | 4937 | N   | ALA | C | 321 | 117.488 | 132.870 | -70.786 | 1.00 | 55.04  | C | N |
| ATOM | 4938 | CA  | ALA | C | 321 | 118.192 | 133.673 | -71.778 | 1.00 | 55.04  | C | C |
| ATOM | 4939 | CB  | ALA | C | 321 | 118.174 | 135.141 | -71.382 | 1.00 | 55.04  | C | C |
| ATOM | 4940 | C   | ALA | C | 321 | 119.625 | 133.184 | -71.951 | 1.00 | 55.04  | C | C |
| ATOM | 4941 | O   | ALA | C | 321 | 120.189 | 133.256 | -73.042 | 1.00 | 55.04  | C | O |
| ATOM | 4942 | N   | SER | C | 322 | 120.206 | 132.685 | -70.865 | 1.00 | 39.37  | C | N |
| ATOM | 4943 | CA  | SER | C | 322 | 121.561 | 132.148 | -70.899 | 1.00 | 39.37  | C | C |
| ATOM | 4944 | CB  | SER | C | 322 | 122.214 | 132.254 | -69.520 | 1.00 | 39.37  | C | C |
| ATOM | 4945 | OG  | SER | C | 322 | 122.285 | 133.602 | -69.091 | 1.00 | 39.37  | C | O |
| ATOM | 4946 | C   | SER | C | 322 | 121.556 | 130.698 | -71.368 | 1.00 | 39.37  | C | C |
| ATOM | 4947 | O   | SER | C | 322 | 122.433 | 130.276 | -72.122 | 1.00 | 39.37  | C | O |
| ATOM | 4948 | N   | GLU | C | 323 | 120.561 | 129.939 | -70.917 | 1.00 | 101.99 | C | N |
| ATOM | 4949 | CA  | GLU | C | 323 | 120.429 | 128.539 | -71.303 | 1.00 | 101.99 | C | C |
| ATOM | 4950 | CB  | GLU | C | 323 | 119.224 | 127.903 | -70.607 | 1.00 | 101.99 | C | C |
| ATOM | 4951 | CG  | GLU | C | 323 | 119.279 | 127.955 | -69.089 | 1.00 | 101.99 | C | C |
| ATOM | 4952 | CD  | GLU | C | 323 | 120.408 | 127.121 | -68.513 | 1.00 | 101.99 | C | C |
| ATOM | 4953 | OE1 | GLU | C | 323 | 121.031 | 126.350 | -69.273 | 1.00 | 101.99 | C | O |
| ATOM | 4954 | OE2 | GLU | C | 323 | 120.671 | 127.236 | -67.298 | 1.00 | 101.99 | C | O |
| ATOM | 4955 | C   | GLU | C | 323 | 120.291 | 128.403 | -72.814 | 1.00 | 101.99 | C | C |
| ATOM | 4956 | O   | GLU | C | 323 | 120.913 | 127.537 | -73.430 | 1.00 | 101.99 | C | O |
| ATOM | 4957 | N   | LEU | C | 324 | 119.469 | 129.264 | -73.406 | 1.00 | 51.45  | C | N |
| ATOM | 4958 | CA  | LEU | C | 324 | 119.267 | 129.263 | -74.849 | 1.00 | 51.45  | C | C |
| ATOM | 4959 | CB  | LEU | C | 324 | 118.096 | 130.173 | -75.226 | 1.00 | 51.45  | C | C |
| ATOM | 4960 | CG  | LEU | C | 324 | 117.727 | 130.237 | -76.709 | 1.00 | 51.45  | C | C |
| ATOM | 4961 | CD1 | LEU | C | 324 | 117.372 | 128.855 | -77.234 | 1.00 | 51.45  | C | C |
| ATOM | 4962 | CD2 | LEU | C | 324 | 116.581 | 131.211 | -76.936 | 1.00 | 51.45  | C | C |
| ATOM | 4963 | C   | LEU | C | 324 | 120.534 | 129.713 | -75.568 | 1.00 | 51.45  | C | C |
| ATOM | 4964 | O   | LEU | C | 324 | 120.776 | 129.339 | -76.715 | 1.00 | 51.45  | C | O |
| ATOM | 4965 | N   | GLY | C | 325 | 121.341 | 130.517 | -74.882 | 1.00 | 21.45  | C | N |
| ATOM | 4966 | CA  | GLY | C | 325 | 122.585 | 131.011 | -75.443 | 1.00 | 21.45  | C | C |
| ATOM | 4967 | C   | GLY | C | 325 | 123.570 | 129.897 | -75.737 | 1.00 | 21.45  | C | C |
| ATOM | 4968 | O   | GLY | C | 325 | 124.178 | 129.862 | -76.807 | 1.00 | 21.45  | C | O |
| ATOM | 4969 | N   | PHE | C | 326 | 123.728 | 128.984 | -74.784 | 1.00 | 93.89  | C | N |
| ATOM | 4970 | CA  | PHE | C | 326 | 124.637 | 127.855 | -74.949 | 1.00 | 93.89  | C | C |
| ATOM | 4971 | CB  | PHE | C | 326 | 124.891 | 127.165 | -73.606 | 1.00 | 93.89  | C | C |
| ATOM | 4972 | CG  | PHE | C | 326 | 125.676 | 127.999 | -72.633 | 1.00 | 93.89  | C | C |
| ATOM | 4973 | CD1 | PHE | C | 326 | 125.031 | 128.811 | -71.716 | 1.00 | 93.89  | C | C |
| ATOM | 4974 | CD2 | PHE | C | 326 | 127.061 | 127.968 | -72.635 | 1.00 | 93.89  | C | C |
| ATOM | 4975 | CE1 | PHE | C | 326 | 125.752 | 129.578 | -70.820 | 1.00 | 93.89  | C | C |
| ATOM | 4976 | CE2 | PHE | C | 326 | 127.787 | 128.733 | -71.742 | 1.00 | 93.89  | C | C |
| ATOM | 4977 | CZ  | PHE | C | 326 | 127.132 | 129.539 | -70.833 | 1.00 | 93.89  | C | C |
| ATOM | 4978 | C   | PHE | C | 326 | 124.098 | 126.851 | -75.962 | 1.00 | 93.89  | C | C |
| ATOM | 4979 | O   | PHE | C | 326 | 124.855 | 126.064 | -76.531 | 1.00 | 93.89  | C | O |
| ATOM | 4980 | N   | LEU | C | 327 | 122.788 | 126.881 | -76.183 | 1.00 | 47.15  | C | N |
| ATOM | 4981 | CA  | LEU | C | 327 | 122.154 | 125.988 | -77.147 | 1.00 | 47.15  | C | C |
| ATOM | 4982 | CB  | LEU | C | 327 | 120.631 | 126.066 | -77.034 | 1.00 | 47.15  | C | C |
| ATOM | 4983 | CG  | LEU | C | 327 | 119.831 | 125.245 | -78.049 | 1.00 | 47.15  | C | C |
| ATOM | 4984 | CD1 | LEU | C | 327 | 120.255 | 123.784 | -78.023 | 1.00 | 47.15  | C | C |
| ATOM | 4985 | CD2 | LEU | C | 327 | 118.339 | 125.379 | -77.789 | 1.00 | 47.15  | C | C |
| ATOM | 4986 | C   | LEU | C | 327 | 122.594 | 126.321 | -78.568 | 1.00 | 47.15  | C | C |
| ATOM | 4987 | O   | LEU | C | 327 | 122.931 | 125.431 | -79.348 | 1.00 | 47.15  | C | O |
| ATOM | 4988 | N   | LEU | C | 328 | 122.588 | 127.608 | -78.897 | 1.00 | 87.13  | C | N |
| ATOM | 4989 | CA  | LEU | C | 328 | 123.025 | 128.062 | -80.212 | 1.00 | 87.13  | C | C |
| ATOM | 4990 | CB  | LEU | C | 328 | 122.424 | 129.431 | -80.542 | 1.00 | 87.13  | C | C |
| ATOM | 4991 | CG  | LEU | C | 328 | 120.943 | 129.491 | -80.932 | 1.00 | 87.13  | C | C |
| ATOM | 4992 | CD1 | LEU | C | 328 | 120.048 | 128.973 | -79.815 | 1.00 | 87.13  | C | C |
| ATOM | 4993 | CD2 | LEU | C | 328 | 120.554 | 130.911 | -81.314 | 1.00 | 87.13  | C | C |
| ATOM | 4994 | C   | LEU | C | 328 | 124.546 | 128.125 | -80.280 | 1.00 | 87.13  | C | C |
| ATOM | 4995 | O   | LEU | C | 328 | 125.134 | 128.031 | -81.357 | 1.00 | 87.13  | C | O |
| ATOM | 4996 | N   | PHE | C | 329 | 125.178 | 128.282 | -79.121 | 1.00 | 48.49  | C | N |
| ATOM | 4997 | CA  | PHE | C | 329 | 126.632 | 128.336 | -79.046 | 1.00 | 48.49  | C | C |
| ATOM | 4998 | CB  | PHE | C | 329 | 127.083 | 128.793 | -77.657 | 1.00 | 48.49  | C | C |
| ATOM | 4999 | CG  | PHE | C | 329 | 128.574 | 128.855 | -77.496 | 1.00 | 48.49  | C | C |
| ATOM | 5000 | CD1 | PHE | C | 329 | 129.278 | 129.994 | -77.854 | 1.00 | 48.49  | C | C |
| ATOM | 5001 | CD2 | PHE | C | 329 | 129.273 | 127.775 | -76.986 | 1.00 | 48.49  | C | C |
| ATOM | 5002 | CE1 | PHE | C | 329 | 130.651 | 130.053 | -77.707 | 1.00 | 48.49  | C | C |

|      |      |     |     |   |     |         |         |         |      |        |   |   |
|------|------|-----|-----|---|-----|---------|---------|---------|------|--------|---|---|
| ATOM | 5003 | CE2 | PHE | C | 329 | 130.645 | 127.828 | -76.836 | 1.00 | 48.49  | C | C |
| ATOM | 5004 | CZ  | PHE | C | 329 | 131.335 | 128.969 | -77.197 | 1.00 | 48.49  | C | C |
| ATOM | 5005 | C   | PHE | C | 329 | 127.242 | 126.979 | -79.376 | 1.00 | 48.49  | C | C |
| ATOM | 5006 | O   | PHE | C | 329 | 127.992 | 126.845 | -80.342 | 1.00 | 48.49  | C | O |
| ATOM | 5007 | N   | SER | C | 330 | 126.914 | 125.975 | -78.568 | 1.00 | 71.43  | C | N |
| ATOM | 5008 | CA  | SER | C | 330 | 127.408 | 124.620 | -78.786 | 1.00 | 71.43  | C | C |
| ATOM | 5009 | CB  | SER | C | 330 | 126.888 | 123.680 | -77.697 | 1.00 | 71.43  | C | C |
| ATOM | 5010 | OG  | SER | C | 330 | 125.471 | 123.664 | -77.672 | 1.00 | 71.43  | C | O |
| ATOM | 5011 | C   | SER | C | 330 | 127.002 | 124.105 | -80.163 | 1.00 | 71.43  | C | C |
| ATOM | 5012 | O   | SER | C | 330 | 127.658 | 123.229 | -80.727 | 1.00 | 71.43  | C | O |
| ATOM | 5013 | N   | LEU | C | 331 | 125.915 | 124.652 | -80.697 | 1.00 | 53.19  | C | N |
| ATOM | 5014 | CA  | LEU | C | 331 | 125.446 | 124.286 | -82.028 | 1.00 | 53.19  | C | C |
| ATOM | 5015 | CB  | LEU | C | 331 | 124.033 | 124.821 | -82.265 | 1.00 | 53.19  | C | C |
| ATOM | 5016 | CG  | LEU | C | 331 | 123.439 | 124.583 | -83.655 | 1.00 | 53.19  | C | C |
| ATOM | 5017 | CD1 | LEU | C | 331 | 123.325 | 123.094 | -83.946 | 1.00 | 53.19  | C | C |
| ATOM | 5018 | CD2 | LEU | C | 331 | 122.085 | 125.261 | -83.785 | 1.00 | 53.19  | C | C |
| ATOM | 5019 | C   | LEU | C | 331 | 126.392 | 124.820 | -83.097 | 1.00 | 53.19  | C | C |
| ATOM | 5020 | O   | LEU | C | 331 | 126.959 | 124.055 | -83.876 | 1.00 | 53.19  | C | O |
| ATOM | 5021 | N   | THR | C | 332 | 126.557 | 126.139 | -83.124 | 1.00 | 103.02 | C | N |
| ATOM | 5022 | CA  | THR | C | 332 | 127.421 | 126.791 | -84.103 | 1.00 | 103.02 | C | C |
| ATOM | 5023 | CB  | THR | C | 332 | 127.527 | 128.306 | -83.839 | 1.00 | 103.02 | C | C |
| ATOM | 5024 | OG1 | THR | C | 332 | 126.219 | 128.891 | -83.869 | 1.00 | 103.02 | C | O |
| ATOM | 5025 | CG2 | THR | C | 332 | 128.399 | 128.973 | -84.892 | 1.00 | 103.02 | C | C |
| ATOM | 5026 | C   | THR | C | 332 | 128.820 | 126.183 | -84.108 | 1.00 | 103.02 | C | C |
| ATOM | 5027 | O   | THR | C | 332 | 129.429 | 126.012 | -85.165 | 1.00 | 103.02 | C | O |
| ATOM | 5028 | N   | MET | C | 333 | 129.325 | 125.858 | -82.922 | 1.00 | 112.73 | C | N |
| ATOM | 5029 | CA  | MET | C | 333 | 130.639 | 125.240 | -82.795 | 1.00 | 112.73 | C | C |
| ATOM | 5030 | CB  | MET | C | 333 | 130.960 | 124.957 | -81.326 | 1.00 | 112.73 | C | C |
| ATOM | 5031 | CG  | MET | C | 333 | 131.058 | 126.202 | -80.460 | 1.00 | 112.73 | C | C |
| ATOM | 5032 | SD  | MET | C | 333 | 132.335 | 127.341 | -81.028 | 1.00 | 112.73 | C | S |
| ATOM | 5033 | CE  | MET | C | 333 | 133.787 | 126.298 | -80.924 | 1.00 | 112.73 | C | C |
| ATOM | 5034 | C   | MET | C | 333 | 130.714 | 123.951 | -83.604 | 1.00 | 112.73 | C | C |
| ATOM | 5035 | O   | MET | C | 333 | 131.611 | 123.776 | -84.428 | 1.00 | 112.73 | C | O |
| ATOM | 5036 | N   | ALA | C | 334 | 129.764 | 123.053 | -83.365 | 1.00 | 30.08  | C | N |
| ATOM | 5037 | CA  | ALA | C | 334 | 129.722 | 121.775 | -84.067 | 1.00 | 30.08  | C | C |
| ATOM | 5038 | CB  | ALA | C | 334 | 128.649 | 120.879 | -83.469 | 1.00 | 30.08  | C | C |
| ATOM | 5039 | C   | ALA | C | 334 | 129.488 | 121.967 | -85.562 | 1.00 | 30.08  | C | C |
| ATOM | 5040 | O   | ALA | C | 334 | 129.964 | 121.179 | -86.379 | 1.00 | 30.08  | C | O |
| ATOM | 5041 | N   | ILE | C | 335 | 128.752 | 123.017 | -85.914 | 1.00 | 41.45  | C | N |
| ATOM | 5042 | CA  | ILE | C | 335 | 128.448 | 123.306 | -87.312 | 1.00 | 41.45  | C | C |
| ATOM | 5043 | CB  | ILE | C | 335 | 127.621 | 124.598 | -87.460 | 1.00 | 41.45  | C | C |
| ATOM | 5044 | CG2 | ILE | C | 335 | 127.465 | 124.964 | -88.928 | 1.00 | 41.45  | C | C |
| ATOM | 5045 | CG1 | ILE | C | 335 | 126.249 | 124.431 | -86.805 | 1.00 | 41.45  | C | C |
| ATOM | 5046 | CD1 | ILE | C | 335 | 125.371 | 125.660 | -86.902 | 1.00 | 41.45  | C | C |
| ATOM | 5047 | C   | ILE | C | 335 | 129.715 | 123.425 | -88.153 | 1.00 | 41.45  | C | C |
| ATOM | 5048 | O   | ILE | C | 335 | 129.893 | 122.696 | -89.128 | 1.00 | 41.45  | C | O |
| ATOM | 5049 | N   | ILE | C | 336 | 130.593 | 124.345 | -87.767 | 1.00 | 44.55  | C | N |
| ATOM | 5050 | CA  | ILE | C | 336 | 131.831 | 124.580 | -88.502 | 1.00 | 44.55  | C | C |
| ATOM | 5051 | CB  | ILE | C | 336 | 132.613 | 125.772 | -87.917 | 1.00 | 44.55  | C | C |
| ATOM | 5052 | CG2 | ILE | C | 336 | 133.822 | 126.094 | -88.782 | 1.00 | 44.55  | C | C |
| ATOM | 5053 | CG1 | ILE | C | 336 | 131.699 | 126.992 | -87.782 | 1.00 | 44.55  | C | C |
| ATOM | 5054 | CD1 | ILE | C | 336 | 132.382 | 128.207 | -87.191 | 1.00 | 44.55  | C | C |
| ATOM | 5055 | C   | ILE | C | 336 | 132.724 | 123.341 | -88.507 | 1.00 | 44.55  | C | C |
| ATOM | 5056 | O   | ILE | C | 336 | 133.452 | 123.094 | -89.468 | 1.00 | 44.55  | C | O |
| ATOM | 5057 | N   | ILE | C | 337 | 132.660 | 122.564 | -87.430 | 1.00 | 87.94  | C | N |
| ATOM | 5058 | CA  | ILE | C | 337 | 133.479 | 121.363 | -87.301 | 1.00 | 87.94  | C | C |
| ATOM | 5059 | CB  | ILE | C | 337 | 133.319 | 120.718 | -85.911 | 1.00 | 87.94  | C | C |
| ATOM | 5060 | CG2 | ILE | C | 337 | 134.106 | 119.420 | -85.833 | 1.00 | 87.94  | C | C |
| ATOM | 5061 | CG1 | ILE | C | 337 | 133.774 | 121.687 | -84.818 | 1.00 | 87.94  | C | C |
| ATOM | 5062 | CD1 | ILE | C | 337 | 133.588 | 121.154 | -83.415 | 1.00 | 87.94  | C | C |
| ATOM | 5063 | C   | ILE | C | 337 | 133.146 | 120.325 | -88.368 | 1.00 | 87.94  | C | C |
| ATOM | 5064 | O   | ILE | C | 337 | 134.031 | 119.852 | -89.082 | 1.00 | 87.94  | C | O |
| ATOM | 5065 | N   | PHE | C | 338 | 131.869 | 119.974 | -88.472 | 1.00 | 61.40  | C | N |
| ATOM | 5066 | CA  | PHE | C | 338 | 131.431 | 118.953 | -89.419 | 1.00 | 61.40  | C | C |
| ATOM | 5067 | CB  | PHE | C | 338 | 130.095 | 118.348 | -88.983 | 1.00 | 61.40  | C | C |
| ATOM | 5068 | CG  | PHE | C | 338 | 130.163 | 117.603 | -87.680 | 1.00 | 61.40  | C | C |
| ATOM | 5069 | CD1 | PHE | C | 338 | 130.593 | 116.287 | -87.642 | 1.00 | 61.40  | C | C |
| ATOM | 5070 | CD2 | PHE | C | 338 | 129.794 | 118.216 | -86.495 | 1.00 | 61.40  | C | C |

|      |      |     |     |   |     |         |         |          |      |        |   |   |
|------|------|-----|-----|---|-----|---------|---------|----------|------|--------|---|---|
| ATOM | 5071 | CE1 | PHE | C | 338 | 130.656 | 115.598 | -86.445  | 1.00 | 61.40  | C | C |
| ATOM | 5072 | CE2 | PHE | C | 338 | 129.855 | 117.533 | -85.296  | 1.00 | 61.40  | C | C |
| ATOM | 5073 | CZ  | PHE | C | 338 | 130.286 | 116.222 | -85.271  | 1.00 | 61.40  | C | C |
| ATOM | 5074 | C   | PHE | C | 338 | 131.325 | 119.492 | -90.844  | 1.00 | 61.40  | C | C |
| ATOM | 5075 | O   | PHE | C | 338 | 131.613 | 118.781 | -91.805  | 1.00 | 61.40  | C | O |
| ATOM | 5076 | N   | ALA | C | 339 | 130.912 | 120.749 | -90.973  | 1.00 | 38.36  | C | N |
| ATOM | 5077 | CA  | ALA | C | 339 | 130.748 | 121.367 | -92.285  | 1.00 | 38.36  | C | C |
| ATOM | 5078 | CB  | ALA | C | 339 | 130.255 | 122.799 | -92.142  | 1.00 | 38.36  | C | C |
| ATOM | 5079 | C   | ALA | C | 339 | 132.042 | 121.327 | -93.092  | 1.00 | 38.36  | C | C |
| ATOM | 5080 | O   | ALA | C | 339 | 132.017 | 121.332 | -94.322  | 1.00 | 38.36  | C | O |
| ATOM | 5081 | N   | THR | C | 340 | 133.171 | 121.286 | -92.392  | 1.00 | 117.99 | C | N |
| ATOM | 5082 | CA  | THR | C | 340 | 134.474 | 121.251 | -93.047  | 1.00 | 117.99 | C | C |
| ATOM | 5083 | CB  | THR | C | 340 | 135.561 | 121.928 | -92.187  | 1.00 | 117.99 | C | C |
| ATOM | 5084 | OG1 | THR | C | 340 | 135.611 | 121.306 | -90.897  | 1.00 | 117.99 | C | O |
| ATOM | 5085 | CG2 | THR | C | 340 | 135.261 | 123.409 | -92.020  | 1.00 | 117.99 | C | C |
| ATOM | 5086 | C   | THR | C | 340 | 134.906 | 119.825 | -93.381  | 1.00 | 117.99 | C | C |
| ATOM | 5087 | O   | THR | C | 340 | 135.187 | 119.510 | -94.536  | 1.00 | 117.99 | C | O |
| ATOM | 5088 | N   | VAL | C | 341 | 134.953 | 118.967 | -92.367  | 1.00 | 49.53  | C | N |
| ATOM | 5089 | CA  | VAL | C | 341 | 135.394 | 117.587 | -92.551  | 1.00 | 49.53  | C | C |
| ATOM | 5090 | CB  | VAL | C | 341 | 135.351 | 116.794 | -91.229  | 1.00 | 49.53  | C | C |
| ATOM | 5091 | CG1 | VAL | C | 341 | 136.305 | 117.402 | -90.213  | 1.00 | 49.53  | C | C |
| ATOM | 5092 | CG2 | VAL | C | 341 | 133.934 | 116.750 | -90.680  | 1.00 | 49.53  | C | C |
| ATOM | 5093 | C   | VAL | C | 341 | 134.566 | 116.856 | -93.606  | 1.00 | 49.53  | C | C |
| ATOM | 5094 | O   | VAL | C | 341 | 135.061 | 115.951 | -94.278  | 1.00 | 49.53  | C | O |
| ATOM | 5095 | N   | MET | C | 342 | 133.305 | 117.252 | -93.746  | 1.00 | 112.56 | C | N |
| ATOM | 5096 | CA  | MET | C | 342 | 132.418 | 116.644 | -94.730  | 1.00 | 112.56 | C | C |
| ATOM | 5097 | CB  | MET | C | 342 | 130.956 | 116.779 | -94.297  | 1.00 | 112.56 | C | C |
| ATOM | 5098 | CG  | MET | C | 342 | 130.624 | 116.066 | -92.996  | 1.00 | 112.56 | C | C |
| ATOM | 5099 | SD  | MET | C | 342 | 128.873 | 116.160 | -92.576  | 1.00 | 112.56 | C | S |
| ATOM | 5100 | CE  | MET | C | 342 | 128.640 | 117.934 | -92.481  | 1.00 | 112.56 | C | C |
| ATOM | 5101 | C   | MET | C | 342 | 132.614 | 117.268 | -96.108  | 1.00 | 112.56 | C | C |
| ATOM | 5102 | O   | MET | C | 342 | 132.315 | 116.648 | -97.129  | 1.00 | 112.56 | C | O |
| ATOM | 5103 | N   | PHE | C | 343 | 133.117 | 118.497 | -96.128  | 1.00 | 78.09  | C | N |
| ATOM | 5104 | CA  | PHE | C | 343 | 133.351 | 119.206 | -97.381  | 1.00 | 78.09  | C | C |
| ATOM | 5105 | CB  | PHE | C | 343 | 133.419 | 120.716 | -97.143  | 1.00 | 78.09  | C | C |
| ATOM | 5106 | CG  | PHE | C | 343 | 133.695 | 121.511 | -98.386  | 1.00 | 78.09  | C | C |
| ATOM | 5107 | CD1 | PHE | C | 343 | 132.671 | 121.828 | -99.263  | 1.00 | 78.09  | C | C |
| ATOM | 5108 | CD2 | PHE | C | 343 | 134.978 | 121.942 | -98.679  | 1.00 | 78.09  | C | C |
| ATOM | 5109 | CE1 | PHE | C | 343 | 132.921 | 122.558 | -100.409 | 1.00 | 78.09  | C | C |
| ATOM | 5110 | CE2 | PHE | C | 343 | 135.234 | 122.674 | -99.823  | 1.00 | 78.09  | C | C |
| ATOM | 5111 | CZ  | PHE | C | 343 | 134.204 | 122.982 | -100.689 | 1.00 | 78.09  | C | C |
| ATOM | 5112 | C   | PHE | C | 343 | 134.625 | 118.726 | -98.067  | 1.00 | 78.09  | C | C |
| ATOM | 5113 | O   | PHE | C | 343 | 134.619 | 118.414 | -99.257  | 1.00 | 78.09  | C | O |
| ATOM | 5114 | N   | TYR | C | 344 | 135.717 | 118.671 | -97.311  | 1.00 | 66.10  | C | N |
| ATOM | 5115 | CA  | TYR | C | 344 | 136.999 | 118.232 | -97.851  | 1.00 | 66.10  | C | C |
| ATOM | 5116 | CB  | TYR | C | 344 | 138.130 | 118.512 | -96.859  | 1.00 | 66.10  | C | C |
| ATOM | 5117 | CG  | TYR | C | 344 | 138.303 | 119.976 | -96.521  | 1.00 | 66.10  | C | C |
| ATOM | 5118 | CD1 | TYR | C | 344 | 139.008 | 120.826 | -97.364  | 1.00 | 66.10  | C | C |
| ATOM | 5119 | CD2 | TYR | C | 344 | 137.767 | 120.508 | -95.356  | 1.00 | 66.10  | C | C |
| ATOM | 5120 | CE1 | TYR | C | 344 | 139.169 | 122.164 | -97.058  | 1.00 | 66.10  | C | C |
| ATOM | 5121 | CE2 | TYR | C | 344 | 137.923 | 121.845 | -95.042  | 1.00 | 66.10  | C | C |
| ATOM | 5122 | CZ  | TYR | C | 344 | 138.625 | 122.668 | -95.896  | 1.00 | 66.10  | C | C |
| ATOM | 5123 | OH  | TYR | C | 344 | 138.783 | 123.999 | -95.584  | 1.00 | 66.10  | C | O |
| ATOM | 5124 | C   | TYR | C | 344 | 136.969 | 116.749 | -98.211  | 1.00 | 66.10  | C | C |
| ATOM | 5125 | O   | TYR | C | 344 | 137.868 | 116.246 | -98.885  | 1.00 | 66.10  | C | O |
| ATOM | 5126 | N   | ALA | C | 345 | 135.930 | 116.056 | -97.755  | 1.00 | 55.12  | C | N |
| ATOM | 5127 | CA  | ALA | C | 345 | 135.768 | 114.636 | -98.045  | 1.00 | 55.12  | C | C |
| ATOM | 5128 | CB  | ALA | C | 345 | 135.079 | 113.935 | -96.886  | 1.00 | 55.12  | C | C |
| ATOM | 5129 | C   | ALA | C | 345 | 134.984 | 114.429 | -99.337  | 1.00 | 55.12  | C | C |
| ATOM | 5130 | O   | ALA | C | 345 | 135.051 | 113.365 | -99.952  | 1.00 | 55.12  | C | O |
| ATOM | 5131 | N   | GLU | C | 346 | 134.242 | 115.455 | -99.742  | 1.00 | 125.73 | C | N |
| ATOM | 5132 | CA  | GLU | C | 346 | 133.444 | 115.391 | -100.960 | 1.00 | 125.73 | C | C |
| ATOM | 5133 | CB  | GLU | C | 346 | 131.999 | 115.806 | -100.676 | 1.00 | 125.73 | C | C |
| ATOM | 5134 | CG  | GLU | C | 346 | 131.294 | 114.944 | -99.640  | 1.00 | 125.73 | C | C |
| ATOM | 5135 | CD  | GLU | C | 346 | 131.060 | 113.525 | -100.119 | 1.00 | 125.73 | C | C |
| ATOM | 5136 | OE1 | GLU | C | 346 | 131.239 | 113.264 | -101.328 | 1.00 | 125.73 | C | O |
| ATOM | 5137 | OE2 | GLU | C | 346 | 130.697 | 112.668 | -99.286  | 1.00 | 125.73 | C | O |
| ATOM | 5138 | C   | GLU | C | 346 | 134.036 | 116.276 | -102.054 | 1.00 | 125.73 | C | C |

|      |      |     |     |   |     |         |                 |            |   |   |
|------|------|-----|-----|---|-----|---------|-----------------|------------|---|---|
| ATOM | 5139 | O   | GLU | C | 346 | 133.570 | 116.265-103.193 | 1.00125.73 | C | O |
| ATOM | 5140 | N   | LYS | C | 347 | 135.064 | 117.039-101.699 | 1.00138.31 | C | N |
| ATOM | 5141 | CA  | LYS | C | 347 | 135.710 | 117.944-102.643 | 1.00138.31 | C | C |
| ATOM | 5142 | CB  | LYS | C | 347 | 136.711 | 118.848-101.919 | 1.00138.31 | C | C |
| ATOM | 5143 | CG  | LYS | C | 347 | 137.393 | 119.867-102.818 | 1.00138.31 | C | C |
| ATOM | 5144 | CD  | LYS | C | 347 | 138.373 | 120.727-102.035 | 1.00138.31 | C | C |
| ATOM | 5145 | CE  | LYS | C | 347 | 139.054 | 121.746-102.934 | 1.00138.31 | C | C |
| ATOM | 5146 | NZ  | LYS | C | 347 | 139.818 | 121.094-104.033 | 1.00138.31 | C | N |
| ATOM | 5147 | C   | LYS | C | 347 | 136.409 | 117.175-103.760 | 1.00138.31 | C | C |
| ATOM | 5148 | O   | LYS | C | 347 | 136.576 | 117.686-104.867 | 1.00138.31 | C | O |
| ATOM | 5149 | N   | GLY | C | 348 | 136.812 | 115.944-103.462 | 1.00 56.79 | C | N |
| ATOM | 5150 | CA  | GLY | C | 348 | 137.490 | 115.108-104.434 | 1.00 56.79 | C | C |
| ATOM | 5151 | C   | GLY | C | 348 | 136.528 | 114.393-105.362 | 1.00 56.79 | C | C |
| ATOM | 5152 | O   | GLY | C | 348 | 136.891 | 113.415-106.016 | 1.00 56.79 | C | O |
| ATOM | 5153 | N   | SER | C | 349 | 135.294 | 114.884-105.419 | 1.00123.99 | C | N |
| ATOM | 5154 | CA  | SER | C | 349 | 134.271 | 114.289-106.271 | 1.00123.99 | C | C |
| ATOM | 5155 | CB  | SER | C | 349 | 133.173 | 113.647-105.421 | 1.00123.99 | C | C |
| ATOM | 5156 | OG  | SER | C | 349 | 133.705 | 112.638-104.581 | 1.00123.99 | C | O |
| ATOM | 5157 | C   | SER | C | 349 | 133.667 | 115.328-107.211 | 1.00123.99 | C | C |
| ATOM | 5158 | O   | SER | C | 349 | 133.490 | 116.488-106.838 | 1.00123.99 | C | O |
| ATOM | 5159 | N   | SER | C | 350 | 133.353 | 114.903-108.430 | 1.00183.36 | C | N |
| ATOM | 5160 | CA  | SER | C | 350 | 132.773 | 115.795-109.427 | 1.00183.36 | C | C |
| ATOM | 5161 | CB  | SER | C | 350 | 132.889 | 115.184-110.825 | 1.00183.36 | C | C |
| ATOM | 5162 | OG  | SER | C | 350 | 132.317 | 116.035-111.803 | 1.00183.36 | C | O |
| ATOM | 5163 | C   | SER | C | 350 | 131.314 | 116.107-109.110 | 1.00183.36 | C | C |
| ATOM | 5164 | O   | SER | C | 350 | 130.866 | 117.243-109.264 | 1.00183.36 | C | O |
| ATOM | 5165 | N   | ALA | C | 351 | 130.579 | 115.093-108.668 | 1.00238.58 | C | N |
| ATOM | 5166 | CA  | ALA | C | 351 | 129.170 | 115.259-108.331 | 1.00238.58 | C | C |
| ATOM | 5167 | CB  | ALA | C | 351 | 128.388 | 114.003-108.687 | 1.00238.58 | C | C |
| ATOM | 5168 | C   | ALA | C | 351 | 128.992 | 115.598-106.855 | 1.00238.58 | C | C |
| ATOM | 5169 | O   | ALA | C | 351 | 128.162 | 115.003-106.167 | 1.00238.58 | C | O |
| ATOM | 5170 | N   | SER | C | 352 | 129.778 | 116.556-106.375 | 1.00139.03 | C | N |
| ATOM | 5171 | CA  | SER | C | 352 | 129.713 | 116.973-104.979 | 1.00139.03 | C | C |
| ATOM | 5172 | CB  | SER | C | 352 | 131.023 | 117.640-104.557 | 1.00139.03 | C | C |
| ATOM | 5173 | OG  | SER | C | 352 | 131.289 | 118.787-105.346 | 1.00139.03 | C | O |
| ATOM | 5174 | C   | SER | C | 352 | 128.544 | 117.923-104.740 | 1.00139.03 | C | C |
| ATOM | 5175 | O   | SER | C | 352 | 128.334 | 118.867-105.501 | 1.00139.03 | C | O |
| ATOM | 5176 | N   | LYS | C | 353 | 127.788 | 117.668-103.677 | 1.00160.96 | C | N |
| ATOM | 5177 | CA  | LYS | C | 353 | 126.641 | 118.501-103.337 | 1.00160.96 | C | C |
| ATOM | 5178 | CB  | LYS | C | 353 | 125.568 | 117.671-102.629 | 1.00160.96 | C | C |
| ATOM | 5179 | CG  | LYS | C | 353 | 125.043 | 116.505-103.450 | 1.00160.96 | C | C |
| ATOM | 5180 | CD  | LYS | C | 353 | 124.426 | 116.980-104.756 | 1.00160.96 | C | C |
| ATOM | 5181 | CE  | LYS | C | 353 | 123.912 | 115.813-105.583 | 1.00160.96 | C | C |
| ATOM | 5182 | NZ  | LYS | C | 353 | 123.310 | 116.263-106.868 | 1.00160.96 | C | N |
| ATOM | 5183 | C   | LYS | C | 353 | 127.055 | 119.679-102.462 | 1.00160.96 | C | C |
| ATOM | 5184 | O   | LYS | C | 353 | 126.225 | 120.508-102.085 | 1.00160.96 | C | O |
| ATOM | 5185 | N   | PHE | C | 354 | 128.343 | 119.747-102.142 | 1.00217.25 | C | N |
| ATOM | 5186 | CA  | PHE | C | 354 | 128.871 | 120.824-101.314 | 1.00217.25 | C | C |
| ATOM | 5187 | CB  | PHE | C | 354 | 129.662 | 120.254-100.135 | 1.00217.25 | C | C |
| ATOM | 5188 | CG  | PHE | C | 354 | 128.853 | 119.360 -99.238 | 1.00217.25 | C | C |
| ATOM | 5189 | CD1 | PHE | C | 354 | 128.151 | 119.886 -98.167 | 1.00217.25 | C | C |
| ATOM | 5190 | CD2 | PHE | C | 354 | 128.796 | 117.995 -99.465 | 1.00217.25 | C | C |
| ATOM | 5191 | CE1 | PHE | C | 354 | 127.406 | 119.067 -97.339 | 1.00217.25 | C | C |
| ATOM | 5192 | CE2 | PHE | C | 354 | 128.053 | 117.171 -98.641 | 1.00217.25 | C | C |
| ATOM | 5193 | CZ  | PHE | C | 354 | 127.357 | 117.709 -97.576 | 1.00217.25 | C | C |
| ATOM | 5194 | C   | PHE | C | 354 | 129.752 | 121.764-102.131 | 1.00217.25 | C | C |
| ATOM | 5195 | O   | PHE | C | 354 | 130.852 | 121.397-102.543 | 1.00217.25 | C | O |
| ATOM | 5196 | N   | THR | C | 355 | 129.261 | 122.977-102.361 | 1.00186.86 | C | N |
| ATOM | 5197 | CA  | THR | C | 355 | 130.000 | 123.967-103.136 | 1.00186.86 | C | C |
| ATOM | 5198 | CB  | THR | C | 355 | 129.061 | 125.029-103.738 | 1.00186.86 | C | C |
| ATOM | 5199 | OG1 | THR | C | 355 | 128.366 | 125.708-102.685 | 1.00186.86 | C | O |
| ATOM | 5200 | CG2 | THR | C | 355 | 128.051 | 124.379-104.671 | 1.00186.86 | C | C |
| ATOM | 5201 | C   | THR | C | 355 | 131.056 | 124.659-102.282 | 1.00186.86 | C | C |
| ATOM | 5202 | O   | THR | C | 355 | 132.197 | 124.835-102.711 | 1.00186.86 | C | O |
| ATOM | 5203 | N   | SER | C | 356 | 130.669 | 125.051-101.073 | 1.00 47.70 | C | N |
| ATOM | 5204 | CA  | SER | C | 356 | 131.583 | 125.724-100.158 | 1.00 47.70 | C | C |
| ATOM | 5205 | CB  | SER | C | 356 | 131.552 | 127.237-100.387 | 1.00 47.70 | C | C |
| ATOM | 5206 | OG  | SER | C | 356 | 130.251 | 127.758-100.176 | 1.00 47.70 | C | O |



|      |      |     |     |   |     |         |         |         |      |       |   |   |
|------|------|-----|-----|---|-----|---------|---------|---------|------|-------|---|---|
| ATOM | 5207 | C   | SER | C | 356 | 131.241 | 125.407 | -98.706 | 1.00 | 47.70 | C | C |
| ATOM | 5208 | O   | SER | C | 356 | 130.155 | 124.910 | -98.409 | 1.00 | 47.70 | C | O |
| ATOM | 5209 | N   | ILE | C | 357 | 132.177 | 125.694 | -97.807 | 1.00 | 65.52 | C | N |
| ATOM | 5210 | CA  | ILE | C | 357 | 131.972 | 125.454 | -96.382 | 1.00 | 65.52 | C | C |
| ATOM | 5211 | CB  | ILE | C | 357 | 133.241 | 125.767 | -95.559 | 1.00 | 65.52 | C | C |
| ATOM | 5212 | CG2 | ILE | C | 357 | 132.985 | 125.543 | -94.077 | 1.00 | 65.52 | C | C |
| ATOM | 5213 | CG1 | ILE | C | 357 | 134.413 | 124.909 | -96.040 | 1.00 | 65.52 | C | C |
| ATOM | 5214 | CD1 | ILE | C | 357 | 135.695 | 125.137 | -95.270 | 1.00 | 65.52 | C | C |
| ATOM | 5215 | C   | ILE | C | 357 | 130.784 | 126.241 | -95.825 | 1.00 | 65.52 | C | C |
| ATOM | 5216 | O   | ILE | C | 357 | 129.952 | 125.681 | -95.110 | 1.00 | 65.52 | C | O |
| ATOM | 5217 | N   | PRO | C | 358 | 130.700 | 127.544 | -96.146 | 1.00 | 79.94 | C | N |
| ATOM | 5218 | CA  | PRO | C | 358 | 129.556 | 128.340 | -95.685 | 1.00 | 79.94 | C | C |
| ATOM | 5219 | CD  | PRO | C | 358 | 131.681 | 128.366 | -96.876 | 1.00 | 79.94 | C | C |
| ATOM | 5220 | CB  | PRO | C | 358 | 129.796 | 129.703 | -96.339 | 1.00 | 79.94 | C | C |
| ATOM | 5221 | CG  | PRO | C | 358 | 131.267 | 129.767 | -96.541 | 1.00 | 79.94 | C | C |
| ATOM | 5222 | C   | PRO | C | 358 | 128.231 | 127.757 | -96.166 | 1.00 | 79.94 | C | C |
| ATOM | 5223 | O   | PRO | C | 358 | 127.224 | 127.855 | -95.465 | 1.00 | 79.94 | C | O |
| ATOM | 5224 | N   | ALA | C | 359 | 128.239 | 127.157 | -97.352 | 1.00 | 43.14 | C | N |
| ATOM | 5225 | CA  | ALA | C | 359 | 127.036 | 126.557 | -97.916 | 1.00 | 43.14 | C | C |
| ATOM | 5226 | CB  | ALA | C | 359 | 127.144 | 126.475 | -99.430 | 1.00 | 43.14 | C | C |
| ATOM | 5227 | C   | ALA | C | 359 | 126.781 | 125.175 | -97.324 | 1.00 | 43.14 | C | C |
| ATOM | 5228 | O   | ALA | C | 359 | 125.698 | 124.611 | -97.481 | 1.00 | 43.14 | C | O |
| ATOM | 5229 | N   | ALA | C | 360 | 127.787 | 124.635 | -96.643 | 1.00 | 50.03 | C | N |
| ATOM | 5230 | CA  | ALA | C | 360 | 127.677 | 123.321 | -96.023 | 1.00 | 50.03 | C | C |
| ATOM | 5231 | CB  | ALA | C | 360 | 129.040 | 122.646 | -95.964 | 1.00 | 50.03 | C | C |
| ATOM | 5232 | C   | ALA | C | 360 | 127.069 | 123.419 | -94.627 | 1.00 | 50.03 | C | C |
| ATOM | 5233 | O   | ALA | C | 360 | 126.833 | 122.404 | -93.970 | 1.00 | 50.03 | C | O |
| ATOM | 5234 | N   | PHE | C | 361 | 126.817 | 124.645 | -94.180 | 1.00 | 66.36 | C | N |
| ATOM | 5235 | CA  | PHE | C | 361 | 126.227 | 124.877 | -92.866 | 1.00 | 66.36 | C | C |
| ATOM | 5236 | CB  | PHE | C | 361 | 126.271 | 126.365 | -92.509 | 1.00 | 66.36 | C | C |
| ATOM | 5237 | CG  | PHE | C | 361 | 127.661 | 126.907 | -92.337 | 1.00 | 66.36 | C | C |
| ATOM | 5238 | CD1 | PHE | C | 361 | 128.732 | 126.053 | -92.136 | 1.00 | 66.36 | C | C |
| ATOM | 5239 | CD2 | PHE | C | 361 | 127.895 | 128.272 | -92.372 | 1.00 | 66.36 | C | C |
| ATOM | 5240 | CE1 | PHE | C | 361 | 130.011 | 126.549 | -91.976 | 1.00 | 66.36 | C | C |
| ATOM | 5241 | CE2 | PHE | C | 361 | 129.173 | 128.774 | -92.212 | 1.00 | 66.36 | C | C |
| ATOM | 5242 | CZ  | PHE | C | 361 | 130.232 | 127.911 | -92.014 | 1.00 | 66.36 | C | C |
| ATOM | 5243 | C   | PHE | C | 361 | 124.791 | 124.369 | -92.813 | 1.00 | 66.36 | C | C |
| ATOM | 5244 | O   | PHE | C | 361 | 124.326 | 123.902 | -91.773 | 1.00 | 66.36 | C | O |
| ATOM | 5245 | N   | TRP | C | 362 | 124.095 | 124.465 | -93.940 | 1.00 | 75.06 | C | N |
| ATOM | 5246 | CA  | TRP | C | 362 | 122.714 | 124.006 | -94.032 | 1.00 | 75.06 | C | C |
| ATOM | 5247 | CB  | TRP | C | 362 | 122.146 | 124.291 | -95.423 | 1.00 | 75.06 | C | C |
| ATOM | 5248 | CG  | TRP | C | 362 | 120.808 | 123.662 | -95.666 | 1.00 | 75.06 | C | C |
| ATOM | 5249 | CD2 | TRP | C | 362 | 119.531 | 124.175 | -95.268 | 1.00 | 75.06 | C | C |
| ATOM | 5250 | CD1 | TRP | C | 362 | 120.562 | 122.483 | -96.308 | 1.00 | 75.06 | C | C |
| ATOM | 5251 | NE1 | TRP | C | 362 | 119.211 | 122.232 | -96.337 | 1.00 | 75.06 | C | N |
| ATOM | 5252 | CE2 | TRP | C | 362 | 118.556 | 123.256 | -95.704 | 1.00 | 75.06 | C | C |
| ATOM | 5253 | CE3 | TRP | C | 362 | 119.118 | 125.323 | -94.585 | 1.00 | 75.06 | C | C |
| ATOM | 5254 | CZ2 | TRP | C | 362 | 117.195 | 123.449 | -95.480 | 1.00 | 75.06 | C | C |
| ATOM | 5255 | CZ3 | TRP | C | 362 | 117.766 | 125.513 | -94.364 | 1.00 | 75.06 | C | C |
| ATOM | 5256 | CH2 | TRP | C | 362 | 116.821 | 124.581 | -94.810 | 1.00 | 75.06 | C | C |
| ATOM | 5257 | C   | TRP | C | 362 | 122.602 | 122.519 | -93.716 | 1.00 | 75.06 | C | C |
| ATOM | 5258 | O   | TRP | C | 362 | 121.849 | 122.120 | -92.828 | 1.00 | 75.06 | C | O |
| ATOM | 5259 | N   | TYR | C | 363 | 123.357 | 121.705 | -94.447 | 1.00 | 49.06 | C | N |
| ATOM | 5260 | CA  | TYR | C | 363 | 123.337 | 120.260 | -94.255 | 1.00 | 49.06 | C | C |
| ATOM | 5261 | CB  | TYR | C | 363 | 124.338 | 119.580 | -95.192 | 1.00 | 49.06 | C | C |
| ATOM | 5262 | CG  | TYR | C | 363 | 124.479 | 118.093 | -94.956 | 1.00 | 49.06 | C | C |
| ATOM | 5263 | CD1 | TYR | C | 363 | 123.576 | 117.195 | -95.509 | 1.00 | 49.06 | C | C |
| ATOM | 5264 | CD2 | TYR | C | 363 | 125.514 | 117.588 | -94.181 | 1.00 | 49.06 | C | C |
| ATOM | 5265 | CE1 | TYR | C | 363 | 123.700 | 115.835 | -95.296 | 1.00 | 49.06 | C | C |
| ATOM | 5266 | CE2 | TYR | C | 363 | 125.646 | 116.230 | -93.963 | 1.00 | 49.06 | C | C |
| ATOM | 5267 | CZ  | TYR | C | 363 | 124.737 | 115.358 | -94.522 | 1.00 | 49.06 | C | C |
| ATOM | 5268 | OH  | TYR | C | 363 | 124.866 | 114.005 | -94.306 | 1.00 | 49.06 | C | O |
| ATOM | 5269 | C   | TYR | C | 363 | 123.633 | 119.875 | -92.810 | 1.00 | 49.06 | C | C |
| ATOM | 5270 | O   | TYR | C | 363 | 123.047 | 118.933 | -92.277 | 1.00 | 49.06 | C | O |
| ATOM | 5271 | N   | THR | C | 364 | 124.545 | 120.609 | -92.180 | 1.00 | 38.67 | C | N |
| ATOM | 5272 | CA  | THR | C | 364 | 124.930 | 120.331 | -90.802 | 1.00 | 38.67 | C | C |
| ATOM | 5273 | CB  | THR | C | 364 | 126.134 | 121.184 | -90.368 | 1.00 | 38.67 | C | C |
| ATOM | 5274 | OG1 | THR | C | 364 | 127.239 | 120.937 | -91.246 | 1.00 | 38.67 | C | O |

|      |      |     |     |   |     |         |         |         |      |        |   |   |
|------|------|-----|-----|---|-----|---------|---------|---------|------|--------|---|---|
| ATOM | 5275 | CG2 | THR | C | 364 | 126.538 | 120.843 | -88.943 | 1.00 | 38.67  | C | C |
| ATOM | 5276 | C   | THR | C | 364 | 123.771 | 120.571 | -89.839 | 1.00 | 38.67  | C | C |
| ATOM | 5277 | O   | THR | C | 364 | 123.392 | 119.681 | -89.079 | 1.00 | 38.67  | C | O |
| ATOM | 5278 | N   | ILE | C | 365 | 123.215 | 121.777 | -89.877 | 1.00 | 87.97  | C | N |
| ATOM | 5279 | CA  | ILE | C | 365 | 122.088 | 122.129 | -89.020 | 1.00 | 87.97  | C | C |
| ATOM | 5280 | CB  | ILE | C | 365 | 121.606 | 123.568 | -89.282 | 1.00 | 87.97  | C | C |
| ATOM | 5281 | CG2 | ILE | C | 365 | 120.438 | 123.916 | -88.372 | 1.00 | 87.97  | C | C |
| ATOM | 5282 | CG1 | ILE | C | 365 | 122.754 | 124.560 | -89.087 | 1.00 | 87.97  | C | C |
| ATOM | 5283 | CD1 | ILE | C | 365 | 122.366 | 126.001 | -89.340 | 1.00 | 87.97  | C | C |
| ATOM | 5284 | C   | ILE | C | 365 | 120.924 | 121.169 | -89.236 | 1.00 | 87.97  | C | C |
| ATOM | 5285 | O   | ILE | C | 365 | 120.274 | 120.740 | -88.283 | 1.00 | 87.97  | C | O |
| ATOM | 5286 | N   | VAL | C | 366 | 120.670 | 120.836 | -90.498 | 1.00 | 48.90  | C | N |
| ATOM | 5287 | CA  | VAL | C | 366 | 119.595 | 119.919 | -90.854 | 1.00 | 48.90  | C | C |
| ATOM | 5288 | CB  | VAL | C | 366 | 119.461 | 119.781 | -92.383 | 1.00 | 48.90  | C | C |
| ATOM | 5289 | CG1 | VAL | C | 366 | 118.563 | 118.608 | -92.737 | 1.00 | 48.90  | C | C |
| ATOM | 5290 | CG2 | VAL | C | 366 | 118.932 | 121.072 | -92.989 | 1.00 | 48.90  | C | C |
| ATOM | 5291 | C   | VAL | C | 366 | 119.809 | 118.537 | -90.242 | 1.00 | 48.90  | C | C |
| ATOM | 5292 | O   | VAL | C | 366 | 118.889 | 117.952 | -89.670 | 1.00 | 48.90  | C | O |
| ATOM | 5293 | N   | THR | C | 367 | 121.028 | 118.024 | -90.362 | 1.00 | 54.03  | C | N |
| ATOM | 5294 | CA  | THR | C | 367 | 121.355 | 116.697 | -89.850 | 1.00 | 54.03  | C | C |
| ATOM | 5295 | CB  | THR | C | 367 | 122.745 | 116.236 | -90.330 | 1.00 | 54.03  | C | C |
| ATOM | 5296 | OG1 | THR | C | 367 | 122.780 | 116.224 | -91.762 | 1.00 | 54.03  | C | O |
| ATOM | 5297 | CG2 | THR | C | 367 | 123.053 | 114.842 | -89.809 | 1.00 | 54.03  | C | C |
| ATOM | 5298 | C   | THR | C | 367 | 121.313 | 116.650 | -88.326 | 1.00 | 54.03  | C | C |
| ATOM | 5299 | O   | THR | C | 367 | 120.789 | 115.702 | -87.740 | 1.00 | 54.03  | C | O |
| ATOM | 5300 | N   | MET | C | 368 | 121.864 | 117.678 | -87.688 | 1.00 | 56.02  | C | N |
| ATOM | 5301 | CA  | MET | C | 368 | 121.924 | 117.732 | -86.231 | 1.00 | 56.02  | C | C |
| ATOM | 5302 | CB  | MET | C | 368 | 122.788 | 118.908 | -85.772 | 1.00 | 56.02  | C | C |
| ATOM | 5303 | CG  | MET | C | 368 | 124.243 | 118.813 | -86.202 | 1.00 | 56.02  | C | C |
| ATOM | 5304 | SD  | MET | C | 368 | 125.246 | 120.174 | -85.576 | 1.00 | 56.02  | C | S |
| ATOM | 5305 | CE  | MET | C | 368 | 125.075 | 119.934 | -83.810 | 1.00 | 56.02  | C | C |
| ATOM | 5306 | C   | MET | C | 368 | 120.536 | 117.821 | -85.601 | 1.00 | 56.02  | C | C |
| ATOM | 5307 | O   | MET | C | 368 | 120.265 | 117.182 | -84.585 | 1.00 | 56.02  | C | O |
| ATOM | 5308 | N   | THR | C | 369 | 119.661 | 118.615 | -86.210 | 1.00 | 66.05  | C | N |
| ATOM | 5309 | CA  | THR | C | 369 | 118.308 | 118.797 | -85.696 | 1.00 | 66.05  | C | C |
| ATOM | 5310 | CB  | THR | C | 369 | 117.734 | 120.170 | -86.088 | 1.00 | 66.05  | C | C |
| ATOM | 5311 | OG1 | THR | C | 369 | 117.683 | 120.280 | -87.516 | 1.00 | 66.05  | C | O |
| ATOM | 5312 | CG2 | THR | C | 369 | 118.599 | 121.289 | -85.529 | 1.00 | 66.05  | C | C |
| ATOM | 5313 | C   | THR | C | 369 | 117.370 | 117.701 | -86.191 | 1.00 | 66.05  | C | C |
| ATOM | 5314 | O   | THR | C | 369 | 116.152 | 117.882 | -86.220 | 1.00 | 66.05  | C | O |
| ATOM | 5315 | N   | THR | C | 370 | 117.948 | 116.569 | -86.580 | 1.00 | 71.04  | C | N |
| ATOM | 5316 | CA  | THR | C | 370 | 117.180 | 115.414 | -87.040 | 1.00 | 71.04  | C | C |
| ATOM | 5317 | CB  | THR | C | 370 | 116.542 | 114.650 | -85.860 | 1.00 | 71.04  | C | C |
| ATOM | 5318 | OG1 | THR | C | 370 | 115.632 | 115.508 | -85.162 | 1.00 | 71.04  | C | O |
| ATOM | 5319 | CG2 | THR | C | 370 | 117.616 | 114.165 | -84.897 | 1.00 | 71.04  | C | C |
| ATOM | 5320 | C   | THR | C | 370 | 116.095 | 115.786 | -88.049 | 1.00 | 71.04  | C | C |
| ATOM | 5321 | O   | THR | C | 370 | 114.910 | 115.544 | -87.818 | 1.00 | 71.04  | C | O |
| ATOM | 5322 | N   | LEU | C | 371 | 116.507 | 116.371 | -89.168 | 1.00 | 149.24 | C | N |
| ATOM | 5323 | CA  | LEU | C | 371 | 115.574 | 116.742 | -90.226 | 1.00 | 149.24 | C | C |
| ATOM | 5324 | CB  | LEU | C | 371 | 115.756 | 118.209 | -90.616 | 1.00 | 149.24 | C | C |
| ATOM | 5325 | CG  | LEU | C | 371 | 115.458 | 119.251 | -89.536 | 1.00 | 149.24 | C | C |
| ATOM | 5326 | CD1 | LEU | C | 371 | 115.778 | 120.649 | -90.040 | 1.00 | 149.24 | C | C |
| ATOM | 5327 | CD2 | LEU | C | 371 | 114.010 | 119.158 | -89.091 | 1.00 | 149.24 | C | C |
| ATOM | 5328 | C   | LEU | C | 371 | 115.750 | 115.851 | -91.450 | 1.00 | 149.24 | C | C |
| ATOM | 5329 | O   | LEU | C | 371 | 114.900 | 115.013 | -91.748 | 1.00 | 149.24 | C | O |
| ATOM | 5330 | N   | GLY | C | 372 | 116.860 | 116.040 | -92.157 | 1.00 | 45.54  | C | N |
| ATOM | 5331 | CA  | GLY | C | 372 | 117.159 | 115.252 | -93.339 | 1.00 | 45.54  | C | C |
| ATOM | 5332 | C   | GLY | C | 372 | 116.150 | 115.451 | -94.453 | 1.00 | 45.54  | C | C |
| ATOM | 5333 | O   | GLY | C | 372 | 115.210 | 114.670 | -94.595 | 1.00 | 45.54  | C | O |
| ATOM | 5334 | N   | TYR | C | 373 | 116.345 | 116.499 | -95.246 | 1.00 | 55.21  | C | N |
| ATOM | 5335 | CA  | TYR | C | 373 | 115.448 | 116.794 | -96.358 | 1.00 | 55.21  | C | C |
| ATOM | 5336 | CB  | TYR | C | 373 | 115.535 | 118.272 | -96.745 | 1.00 | 55.21  | C | C |
| ATOM | 5337 | CG  | TYR | C | 373 | 115.034 | 119.218 | -95.676 | 1.00 | 55.21  | C | C |
| ATOM | 5338 | CD1 | TYR | C | 373 | 115.898 | 119.742 | -94.725 | 1.00 | 55.21  | C | C |
| ATOM | 5339 | CD2 | TYR | C | 373 | 113.697 | 119.587 | -95.620 | 1.00 | 55.21  | C | C |
| ATOM | 5340 | CE1 | TYR | C | 373 | 115.445 | 120.607 | -93.747 | 1.00 | 55.21  | C | C |
| ATOM | 5341 | CE2 | TYR | C | 373 | 113.235 | 120.451 | -94.646 | 1.00 | 55.21  | C | C |
| ATOM | 5342 | CZ  | TYR | C | 373 | 114.112 | 120.958 | -93.712 | 1.00 | 55.21  | C | C |

|      |      |     |     |   |     |         |         |          |      |        |   |   |
|------|------|-----|-----|---|-----|---------|---------|----------|------|--------|---|---|
| ATOM | 5343 | OH  | TYR | C | 373 | 113.654 | 121.819 | -92.741  | 1.00 | 55.21  | C | O |
| ATOM | 5344 | C   | TYR | C | 373 | 115.755 | 115.915 | -97.567  | 1.00 | 55.21  | C | C |
| ATOM | 5345 | O   | TYR | C | 373 | 114.862 | 115.279 | -98.126  | 1.00 | 55.21  | C | O |
| ATOM | 5346 | N   | GLY | C | 374 | 117.023 | 115.887 | -97.965  | 1.00 | 26.05  | C | N |
| ATOM | 5347 | CA  | GLY | C | 374 | 117.447 | 115.084 | -99.097  | 1.00 | 26.05  | C | C |
| ATOM | 5348 | C   | GLY | C | 374 | 118.044 | 115.916 | -100.215 | 1.00 | 26.05  | C | C |
| ATOM | 5349 | O   | GLY | C | 374 | 118.526 | 115.379 | -101.211 | 1.00 | 26.05  | C | O |
| ATOM | 5350 | N   | ASP | C | 375 | 118.010 | 117.235 | -100.049 | 1.00 | 57.71  | C | N |
| ATOM | 5351 | CA  | ASP | C | 375 | 118.549 | 118.146 | -101.052 | 1.00 | 57.71  | C | C |
| ATOM | 5352 | CB  | ASP | C | 375 | 118.107 | 119.584 | -100.770 | 1.00 | 57.71  | C | C |
| ATOM | 5353 | CG  | ASP | C | 375 | 118.652 | 120.117 | -99.458  | 1.00 | 57.71  | C | C |
| ATOM | 5354 | OD1 | ASP | C | 375 | 118.808 | 119.324 | -98.506  | 1.00 | 57.71  | C | O |
| ATOM | 5355 | OD2 | ASP | C | 375 | 118.924 | 121.334 | -99.378  | 1.00 | 57.71  | C | O |
| ATOM | 5356 | C   | ASP | C | 375 | 120.072 | 118.066 | -101.113 | 1.00 | 57.71  | C | C |
| ATOM | 5357 | O   | ASP | C | 375 | 120.677 | 118.355 | -102.145 | 1.00 | 57.71  | C | O |
| ATOM | 5358 | N   | MET | C | 376 | 120.684 | 117.671 | -100.001 | 1.00 | 56.92  | C | N |
| ATOM | 5359 | CA  | MET | C | 376 | 122.135 | 117.544 | -99.927  | 1.00 | 56.92  | C | C |
| ATOM | 5360 | CB  | MET | C | 376 | 122.747 | 118.770 | -99.246  | 1.00 | 56.92  | C | C |
| ATOM | 5361 | CG  | MET | C | 376 | 122.481 | 120.081 | -99.968  | 1.00 | 56.92  | C | C |
| ATOM | 5362 | SD  | MET | C | 376 | 123.179 | 121.503 | -99.105  | 1.00 | 56.92  | C | S |
| ATOM | 5363 | CE  | MET | C | 376 | 124.919 | 121.082 | -99.110  | 1.00 | 56.92  | C | C |
| ATOM | 5364 | C   | MET | C | 376 | 122.531 | 116.277 | -99.177  | 1.00 | 56.92  | C | C |
| ATOM | 5365 | O   | MET | C | 376 | 122.226 | 116.125 | -97.994  | 1.00 | 56.92  | C | O |
| ATOM | 5366 | N   | VAL | C | 377 | 123.211 | 115.370 | -99.870  | 1.00 | 110.24 | C | N |
| ATOM | 5367 | CA  | VAL | C | 377 | 123.649 | 114.116 | -99.265  | 1.00 | 110.24 | C | C |
| ATOM | 5368 | CB  | VAL | C | 377 | 122.680 | 112.960 | -99.590  | 1.00 | 110.24 | C | C |
| ATOM | 5369 | CG1 | VAL | C | 377 | 121.344 | 113.172 | -98.895  | 1.00 | 110.24 | C | C |
| ATOM | 5370 | CG2 | VAL | C | 377 | 122.493 | 112.827 | -101.094 | 1.00 | 110.24 | C | C |
| ATOM | 5371 | C   | VAL | C | 377 | 125.056 | 113.735 | -99.718  | 1.00 | 110.24 | C | C |
| ATOM | 5372 | O   | VAL | C | 377 | 125.396 | 113.880 | -100.892 | 1.00 | 110.24 | C | O |
| ATOM | 5373 | N   | PRO | C | 378 | 125.880 | 113.250 | -98.777  | 1.00 | 157.59 | C | N |
| ATOM | 5374 | CA  | PRO | C | 378 | 127.249 | 112.807 | -99.063  | 1.00 | 157.59 | C | C |
| ATOM | 5375 | CD  | PRO | C | 378 | 125.557 | 113.153 | -97.344  | 1.00 | 157.59 | C | C |
| ATOM | 5376 | CB  | PRO | C | 378 | 127.735 | 112.285 | -97.708  | 1.00 | 157.59 | C | C |
| ATOM | 5377 | CG  | PRO | C | 378 | 126.903 | 113.007 | -96.705  | 1.00 | 157.59 | C | C |
| ATOM | 5378 | C   | PRO | C | 378 | 127.273 | 111.683 | -100.093 | 1.00 | 157.59 | C | C |
| ATOM | 5379 | O   | PRO | C | 378 | 126.251 | 111.033 | -100.317 | 1.00 | 157.59 | C | O |
| ATOM | 5380 | N   | LYS | C | 379 | 128.430 | 111.458 | -100.708 | 1.00 | 201.84 | C | N |
| ATOM | 5381 | CA  | LYS | C | 379 | 128.567 | 110.416 | -101.719 | 1.00 | 201.84 | C | C |
| ATOM | 5382 | CB  | LYS | C | 379 | 128.725 | 111.037 | -103.109 | 1.00 | 201.84 | C | C |
| ATOM | 5383 | CG  | LYS | C | 379 | 127.572 | 111.938 | -103.522 | 1.00 | 201.84 | C | C |
| ATOM | 5384 | CD  | LYS | C | 379 | 126.256 | 111.177 | -103.554 | 1.00 | 201.84 | C | C |
| ATOM | 5385 | CE  | LYS | C | 379 | 126.296 | 110.044 | -104.566 | 1.00 | 201.84 | C | C |
| ATOM | 5386 | NZ  | LYS | C | 379 | 125.007 | 109.300 | -104.616 | 1.00 | 201.84 | C | N |
| ATOM | 5387 | C   | LYS | C | 379 | 129.748 | 109.498 | -101.420 | 1.00 | 201.84 | C | C |
| ATOM | 5388 | O   | LYS | C | 379 | 129.694 | 108.297 | -101.685 | 1.00 | 201.84 | C | O |
| ATOM | 5389 | N   | THR | C | 380 | 130.813 | 110.069 | -100.866 | 1.00 | 144.37 | C | N |
| ATOM | 5390 | CA  | THR | C | 380 | 132.014 | 109.304 | -100.552 | 1.00 | 144.37 | C | C |
| ATOM | 5391 | CB  | THR | C | 380 | 133.265 | 110.202 | -100.526 | 1.00 | 144.37 | C | C |
| ATOM | 5392 | OG1 | THR | C | 380 | 133.109 | 111.215 | -99.526  | 1.00 | 144.37 | C | O |
| ATOM | 5393 | CG2 | THR | C | 380 | 133.477 | 110.859 | -101.881 | 1.00 | 144.37 | C | C |
| ATOM | 5394 | C   | THR | C | 380 | 131.888 | 108.586 | -99.212  | 1.00 | 144.37 | C | C |
| ATOM | 5395 | O   | THR | C | 380 | 130.906 | 108.762 | -98.491  | 1.00 | 144.37 | C | O |
| ATOM | 5396 | N   | ILE | C | 381 | 132.891 | 107.777 | -98.886  | 1.00 | 82.77  | C | N |
| ATOM | 5397 | CA  | ILE | C | 381 | 132.902 | 107.035 | -97.631  | 1.00 | 82.77  | C | C |
| ATOM | 5398 | CB  | ILE | C | 381 | 133.831 | 105.804 | -97.702  | 1.00 | 82.77  | C | C |
| ATOM | 5399 | CG2 | ILE | C | 381 | 134.014 | 105.193 | -96.321  | 1.00 | 82.77  | C | C |
| ATOM | 5400 | CG1 | ILE | C | 381 | 133.272 | 104.756 | -98.669  | 1.00 | 82.77  | C | C |
| ATOM | 5401 | CD1 | ILE | C | 381 | 133.391 | 105.130 | -100.132 | 1.00 | 82.77  | C | C |
| ATOM | 5402 | C   | ILE | C | 381 | 133.340 | 107.929 | -96.476  | 1.00 | 82.77  | C | C |
| ATOM | 5403 | O   | ILE | C | 381 | 132.770 | 107.875 | -95.386  | 1.00 | 82.77  | C | O |
| ATOM | 5404 | N   | ALA | C | 382 | 134.354 | 108.753 | -96.723  | 1.00 | 53.32  | C | N |
| ATOM | 5405 | CA  | ALA | C | 382 | 134.858 | 109.671 | -95.709  | 1.00 | 53.32  | C | C |
| ATOM | 5406 | CB  | ALA | C | 382 | 136.051 | 110.449 | -96.243  | 1.00 | 53.32  | C | C |
| ATOM | 5407 | C   | ALA | C | 382 | 133.763 | 110.625 | -95.243  | 1.00 | 53.32  | C | C |
| ATOM | 5408 | O   | ALA | C | 382 | 133.674 | 110.953 | -94.060  | 1.00 | 53.32  | C | O |
| ATOM | 5409 | N   | GLY | C | 383 | 132.931 | 111.066 | -96.182  | 1.00 | 35.60  | C | N |
| ATOM | 5410 | CA  | GLY | C | 383 | 131.832 | 111.959 | -95.868  | 1.00 | 35.60  | C | C |

|      |      |     |     |   |     |         |         |         |      |        |   |   |
|------|------|-----|-----|---|-----|---------|---------|---------|------|--------|---|---|
| ATOM | 5411 | C   | GLY | C | 383 | 130.667 | 111.226 | -95.232 | 1.00 | 35.60  | C | C |
| ATOM | 5412 | O   | GLY | C | 383 | 129.813 | 111.836 | -94.588 | 1.00 | 35.60  | C | O |
| ATOM | 5413 | N   | LYS | C | 384 | 130.634 | 109.911 | -95.416 | 1.00 | 53.39  | C | N |
| ATOM | 5414 | CA  | LYS | C | 384 | 129.574 | 109.083 | -94.853 | 1.00 | 53.39  | C | C |
| ATOM | 5415 | CB  | LYS | C | 384 | 129.529 | 107.722 | -95.551 | 1.00 | 53.39  | C | C |
| ATOM | 5416 | CG  | LYS | C | 384 | 128.485 | 106.771 | -94.991 | 1.00 | 53.39  | C | C |
| ATOM | 5417 | CD  | LYS | C | 384 | 128.477 | 105.453 | -95.747 | 1.00 | 53.39  | C | C |
| ATOM | 5418 | CE  | LYS | C | 384 | 128.164 | 105.665 | -97.220 | 1.00 | 53.39  | C | C |
| ATOM | 5419 | NZ  | LYS | C | 384 | 126.837 | 106.310 | -97.418 | 1.00 | 53.39  | C | N |
| ATOM | 5420 | C   | LYS | C | 384 | 129.764 | 108.897 | -93.352 | 1.00 | 53.39  | C | C |
| ATOM | 5421 | O   | LYS | C | 384 | 128.802 | 108.930 | -92.586 | 1.00 | 53.39  | C | O |
| ATOM | 5422 | N   | ILE | C | 385 | 131.012 | 108.699 | -92.940 | 1.00 | 33.52  | C | N |
| ATOM | 5423 | CA  | ILE | C | 385 | 131.334 | 108.517 | -91.529 | 1.00 | 33.52  | C | C |
| ATOM | 5424 | CB  | ILE | C | 385 | 132.791 | 108.056 | -91.339 | 1.00 | 33.52  | C | C |
| ATOM | 5425 | CG2 | ILE | C | 385 | 133.102 | 107.866 | -89.863 | 1.00 | 33.52  | C | C |
| ATOM | 5426 | CG1 | ILE | C | 385 | 133.047 | 106.763 | -92.116 | 1.00 | 33.52  | C | C |
| ATOM | 5427 | CD1 | ILE | C | 385 | 134.464 | 106.246 | -91.991 | 1.00 | 33.52  | C | C |
| ATOM | 5428 | C   | ILE | C | 385 | 131.113 | 109.808 | -90.749 | 1.00 | 33.52  | C | C |
| ATOM | 5429 | O   | ILE | C | 385 | 130.535 | 109.797 | -89.662 | 1.00 | 33.52  | C | O |
| ATOM | 5430 | N   | PHE | C | 386 | 131.577 | 110.919 | -91.311 | 1.00 | 111.88 | C | N |
| ATOM | 5431 | CA  | PHE | C | 386 | 131.426 | 112.222 | -90.674 | 1.00 | 111.88 | C | C |
| ATOM | 5432 | CB  | PHE | C | 386 | 132.233 | 113.283 | -91.426 | 1.00 | 111.88 | C | C |
| ATOM | 5433 | CG  | PHE | C | 386 | 133.709 | 113.006 | -91.466 | 1.00 | 111.88 | C | C |
| ATOM | 5434 | CD1 | PHE | C | 386 | 134.309 | 112.230 | -90.488 | 1.00 | 111.88 | C | C |
| ATOM | 5435 | CD2 | PHE | C | 386 | 134.496 | 113.520 | -92.483 | 1.00 | 111.88 | C | C |
| ATOM | 5436 | CE1 | PHE | C | 386 | 135.667 | 111.973 | -90.523 | 1.00 | 111.88 | C | C |
| ATOM | 5437 | CE2 | PHE | C | 386 | 135.854 | 113.267 | -92.523 | 1.00 | 111.88 | C | C |
| ATOM | 5438 | CZ  | PHE | C | 386 | 136.441 | 112.492 | -91.542 | 1.00 | 111.88 | C | C |
| ATOM | 5439 | C   | PHE | C | 386 | 129.958 | 112.630 | -90.602 | 1.00 | 111.88 | C | C |
| ATOM | 5440 | O   | PHE | C | 386 | 129.537 | 113.307 | -89.664 | 1.00 | 111.88 | C | O |
| ATOM | 5441 | N   | GLY | C | 387 | 129.184 | 112.211 | -91.597 | 1.00 | 27.68  | C | N |
| ATOM | 5442 | CA  | GLY | C | 387 | 127.764 | 112.509 | -91.636 | 1.00 | 27.68  | C | C |
| ATOM | 5443 | C   | GLY | C | 387 | 127.001 | 111.792 | -90.540 | 1.00 | 27.68  | C | C |
| ATOM | 5444 | O   | GLY | C | 387 | 125.956 | 112.259 | -90.088 | 1.00 | 27.68  | C | O |
| ATOM | 5445 | N   | SER | C | 388 | 127.529 | 110.650 | -90.111 | 1.00 | 31.06  | C | N |
| ATOM | 5446 | CA  | SER | C | 388 | 126.908 | 109.871 | -89.048 | 1.00 | 31.06  | C | C |
| ATOM | 5447 | CB  | SER | C | 388 | 127.392 | 108.420 | -89.093 | 1.00 | 31.06  | C | C |
| ATOM | 5448 | OG  | SER | C | 388 | 127.072 | 107.814 | -90.334 | 1.00 | 31.06  | C | O |
| ATOM | 5449 | C   | SER | C | 388 | 127.205 | 110.479 | -87.682 | 1.00 | 31.06  | C | C |
| ATOM | 5450 | O   | SER | C | 388 | 126.325 | 110.565 | -86.825 | 1.00 | 31.06  | C | O |
| ATOM | 5451 | N   | ILE | C | 389 | 128.450 | 110.900 | -87.486 | 1.00 | 33.86  | C | N |
| ATOM | 5452 | CA  | ILE | C | 389 | 128.863 | 111.517 | -86.231 | 1.00 | 33.86  | C | C |
| ATOM | 5453 | CB  | ILE | C | 389 | 130.387 | 111.741 | -86.188 | 1.00 | 33.86  | C | C |
| ATOM | 5454 | CG2 | ILE | C | 389 | 130.801 | 112.346 | -84.854 | 1.00 | 33.86  | C | C |
| ATOM | 5455 | CG1 | ILE | C | 389 | 131.126 | 110.425 | -86.438 | 1.00 | 33.86  | C | C |
| ATOM | 5456 | CD1 | ILE | C | 389 | 132.634 | 110.555 | -86.415 | 1.00 | 33.86  | C | C |
| ATOM | 5457 | C   | ILE | C | 389 | 128.155 | 112.852 | -86.026 | 1.00 | 33.86  | C | C |
| ATOM | 5458 | O   | ILE | C | 389 | 127.815 | 113.220 | -84.902 | 1.00 | 33.86  | C | O |
| ATOM | 5459 | N   | CYS | C | 390 | 127.934 | 113.571 | -87.122 | 1.00 | 36.22  | C | N |
| ATOM | 5460 | CA  | CYS | C | 390 | 127.256 | 114.860 | -87.072 | 1.00 | 36.22  | C | C |
| ATOM | 5461 | CB  | CYS | C | 390 | 127.263 | 115.522 | -88.451 | 1.00 | 36.22  | C | C |
| ATOM | 5462 | SG  | CYS | C | 390 | 126.442 | 117.132 | -88.513 | 1.00 | 36.22  | C | S |
| ATOM | 5463 | C   | CYS | C | 390 | 125.823 | 114.708 | -86.573 | 1.00 | 36.22  | C | C |
| ATOM | 5464 | O   | CYS | C | 390 | 125.283 | 115.604 | -85.923 | 1.00 | 36.22  | C | O |
| ATOM | 5465 | N   | SER | C | 391 | 125.213 | 113.569 | -86.883 | 1.00 | 67.70  | C | N |
| ATOM | 5466 | CA  | SER | C | 391 | 123.845 | 113.294 | -86.461 | 1.00 | 67.70  | C | C |
| ATOM | 5467 | CB  | SER | C | 391 | 123.218 | 112.216 | -87.348 | 1.00 | 67.70  | C | C |
| ATOM | 5468 | OG  | SER | C | 391 | 121.882 | 111.950 | -86.956 | 1.00 | 67.70  | C | O |
| ATOM | 5469 | C   | SER | C | 391 | 123.799 | 112.863 | -84.999 | 1.00 | 67.70  | C | C |
| ATOM | 5470 | O   | SER | C | 391 | 122.885 | 113.232 | -84.261 | 1.00 | 67.70  | C | O |
| ATOM | 5471 | N   | LEU | C | 392 | 124.791 | 112.081 | -84.586 | 1.00 | 41.51  | C | N |
| ATOM | 5472 | CA  | LEU | C | 392 | 124.874 | 111.614 | -83.208 | 1.00 | 41.51  | C | C |
| ATOM | 5473 | CB  | LEU | C | 392 | 125.968 | 110.554 | -83.065 | 1.00 | 41.51  | C | C |
| ATOM | 5474 | CG  | LEU | C | 392 | 125.789 | 109.283 | -83.897 | 1.00 | 41.51  | C | C |
| ATOM | 5475 | CD1 | LEU | C | 392 | 126.966 | 108.340 | -83.699 | 1.00 | 41.51  | C | C |
| ATOM | 5476 | CD2 | LEU | C | 392 | 124.480 | 108.594 | -83.547 | 1.00 | 41.51  | C | C |
| ATOM | 5477 | C   | LEU | C | 392 | 125.141 | 112.775 | -82.257 | 1.00 | 41.51  | C | C |
| ATOM | 5478 | O   | LEU | C | 392 | 124.464 | 112.927 | -81.240 | 1.00 | 41.51  | C | O |

|      |      |     |     |   |     |         |         |         |      |        |   |   |
|------|------|-----|-----|---|-----|---------|---------|---------|------|--------|---|---|
| ATOM | 5479 | N   | SER | C | 393 | 126.132 | 113.593 | -82.597 | 1.00 | 31.53  | C | N |
| ATOM | 5480 | CA  | SER | C | 393 | 126.470 | 114.761 | -81.794 | 1.00 | 31.53  | C | C |
| ATOM | 5481 | CB  | SER | C | 393 | 127.754 | 115.413 | -82.310 | 1.00 | 31.53  | C | C |
| ATOM | 5482 | OG  | SER | C | 393 | 128.845 | 114.510 | -82.249 | 1.00 | 31.53  | C | O |
| ATOM | 5483 | C   | SER | C | 393 | 125.328 | 115.770 | -81.806 | 1.00 | 31.53  | C | C |
| ATOM | 5484 | O   | SER | C | 393 | 125.129 | 116.508 | -80.842 | 1.00 | 31.53  | C | O |
| ATOM | 5485 | N   | GLY | C | 394 | 124.580 | 115.795 | -82.904 | 1.00 | 30.12  | C | N |
| ATOM | 5486 | CA  | GLY | C | 394 | 123.451 | 116.696 | -83.039 | 1.00 | 30.12  | C | C |
| ATOM | 5487 | C   | GLY | C | 394 | 122.387 | 116.444 | -81.990 | 1.00 | 30.12  | C | C |
| ATOM | 5488 | O   | GLY | C | 394 | 121.830 | 117.382 | -81.420 | 1.00 | 30.12  | C | O |
| ATOM | 5489 | N   | VAL | C | 395 | 122.105 | 115.171 | -81.734 | 1.00 | 95.83  | C | N |
| ATOM | 5490 | CA  | VAL | C | 395 | 121.114 | 114.792 | -80.734 | 1.00 | 95.83  | C | C |
| ATOM | 5491 | CB  | VAL | C | 395 | 120.785 | 113.289 | -80.806 | 1.00 | 95.83  | C | C |
| ATOM | 5492 | CG1 | VAL | C | 395 | 119.773 | 112.915 | -79.734 | 1.00 | 95.83  | C | C |
| ATOM | 5493 | CG2 | VAL | C | 395 | 120.264 | 112.926 | -82.189 | 1.00 | 95.83  | C | C |
| ATOM | 5494 | C   | VAL | C | 395 | 121.602 | 115.135 | -79.331 | 1.00 | 95.83  | C | C |
| ATOM | 5495 | O   | VAL | C | 395 | 120.832 | 115.602 | -78.492 | 1.00 | 95.83  | C | O |
| ATOM | 5496 | N   | LEU | C | 396 | 122.887 | 114.905 | -79.084 | 1.00 | 88.54  | C | N |
| ATOM | 5497 | CA  | LEU | C | 396 | 123.483 | 115.183 | -77.783 | 1.00 | 88.54  | C | C |
| ATOM | 5498 | CB  | LEU | C | 396 | 124.912 | 114.639 | -77.722 | 1.00 | 88.54  | C | C |
| ATOM | 5499 | CG  | LEU | C | 396 | 125.085 | 113.131 | -77.912 | 1.00 | 88.54  | C | C |
| ATOM | 5500 | CD1 | LEU | C | 396 | 126.559 | 112.766 | -78.010 | 1.00 | 88.54  | C | C |
| ATOM | 5501 | CD2 | LEU | C | 396 | 124.415 | 112.366 | -76.782 | 1.00 | 88.54  | C | C |
| ATOM | 5502 | C   | LEU | C | 396 | 123.484 | 116.677 | -77.476 | 1.00 | 88.54  | C | C |
| ATOM | 5503 | O   | LEU | C | 396 | 122.923 | 117.115 | -76.472 | 1.00 | 88.54  | C | O |
| ATOM | 5504 | N   | VAL | C | 397 | 124.118 | 117.452 | -78.351 | 1.00 | 41.21  | C | N |
| ATOM | 5505 | CA  | VAL | C | 397 | 124.248 | 118.894 | -78.163 | 1.00 | 41.21  | C | C |
| ATOM | 5506 | CB  | VAL | C | 397 | 124.887 | 119.565 | -79.397 | 1.00 | 41.21  | C | C |
| ATOM | 5507 | CG1 | VAL | C | 397 | 124.815 | 121.079 | -79.276 | 1.00 | 41.21  | C | C |
| ATOM | 5508 | CG2 | VAL | C | 397 | 126.326 | 119.103 | -79.568 | 1.00 | 41.21  | C | C |
| ATOM | 5509 | C   | VAL | C | 397 | 122.914 | 119.572 | -77.861 | 1.00 | 41.21  | C | C |
| ATOM | 5510 | O   | VAL | C | 397 | 122.824 | 120.406 | -76.961 | 1.00 | 41.21  | C | O |
| ATOM | 5511 | N   | ILE | C | 398 | 121.882 | 119.210 | -78.615 | 1.00 | 120.02 | C | N |
| ATOM | 5512 | CA  | ILE | C | 398 | 120.569 | 119.826 | -78.458 | 1.00 | 120.02 | C | C |
| ATOM | 5513 | CB  | ILE | C | 398 | 119.668 | 119.558 | -79.681 | 1.00 | 120.02 | C | C |
| ATOM | 5514 | CG2 | ILE | C | 398 | 118.292 | 120.171 | -79.474 | 1.00 | 120.02 | C | C |
| ATOM | 5515 | CG1 | ILE | C | 398 | 120.315 | 120.111 | -80.951 | 1.00 | 120.02 | C | C |
| ATOM | 5516 | CD1 | ILE | C | 398 | 119.497 | 119.882 | -82.203 | 1.00 | 120.02 | C | C |
| ATOM | 5517 | C   | ILE | C | 398 | 119.854 | 119.353 | -77.195 | 1.00 | 120.02 | C | C |
| ATOM | 5518 | O   | ILE | C | 398 | 119.192 | 120.139 | -76.517 | 1.00 | 120.02 | C | O |
| ATOM | 5519 | N   | ALA | C | 399 | 119.995 | 118.070 | -76.878 | 1.00 | 64.31  | C | N |
| ATOM | 5520 | CA  | ALA | C | 399 | 119.289 | 117.481 | -75.743 | 1.00 | 64.31  | C | C |
| ATOM | 5521 | CB  | ALA | C | 399 | 119.174 | 115.972 | -75.916 | 1.00 | 64.31  | C | C |
| ATOM | 5522 | C   | ALA | C | 399 | 119.934 | 117.816 | -74.399 | 1.00 | 64.31  | C | C |
| ATOM | 5523 | O   | ALA | C | 399 | 119.707 | 117.122 | -73.409 | 1.00 | 64.31  | C | O |
| ATOM | 5524 | N   | LEU | C | 400 | 120.733 | 118.878 | -74.365 | 1.00 | 75.94  | C | N |
| ATOM | 5525 | CA  | LEU | C | 400 | 121.385 | 119.296 | -73.126 | 1.00 | 75.94  | C | C |
| ATOM | 5526 | CB  | LEU | C | 400 | 122.895 | 119.467 | -73.328 | 1.00 | 75.94  | C | C |
| ATOM | 5527 | CG  | LEU | C | 400 | 123.685 | 118.213 | -73.706 | 1.00 | 75.94  | C | C |
| ATOM | 5528 | CD1 | LEU | C | 400 | 125.145 | 118.555 | -73.961 | 1.00 | 75.94  | C | C |
| ATOM | 5529 | CD2 | LEU | C | 400 | 123.561 | 117.150 | -72.625 | 1.00 | 75.94  | C | C |
| ATOM | 5530 | C   | LEU | C | 400 | 120.770 | 120.568 | -72.537 | 1.00 | 75.94  | C | C |
| ATOM | 5531 | O   | LEU | C | 400 | 120.375 | 120.581 | -71.371 | 1.00 | 75.94  | C | O |
| ATOM | 5532 | N   | PRO | C | 401 | 120.691 | 121.645 | -73.337 | 1.00 | 77.22  | C | N |
| ATOM | 5533 | CA  | PRO | C | 401 | 120.095 | 122.889 | -72.838 | 1.00 | 77.22  | C | C |
| ATOM | 5534 | CD  | PRO | C | 401 | 121.245 | 121.814 | -74.690 | 1.00 | 77.22  | C | C |
| ATOM | 5535 | CB  | PRO | C | 401 | 120.433 | 123.907 | -73.936 | 1.00 | 77.22  | C | C |
| ATOM | 5536 | CG  | PRO | C | 401 | 121.528 | 123.276 | -74.741 | 1.00 | 77.22  | C | C |
| ATOM | 5537 | C   | PRO | C | 401 | 118.582 | 122.773 | -72.688 | 1.00 | 77.22  | C | C |
| ATOM | 5538 | O   | PRO | C | 401 | 117.995 | 123.440 | -71.836 | 1.00 | 77.22  | C | O |
| ATOM | 5539 | N   | VAL | C | 402 | 117.964 | 121.933 | -73.513 | 1.00 | 140.00 | C | N |
| ATOM | 5540 | CA  | VAL | C | 402 | 116.513 | 121.771 | -73.499 | 1.00 | 140.00 | C | C |
| ATOM | 5541 | CB  | VAL | C | 402 | 116.033 | 120.797 | -74.598 | 1.00 | 140.00 | C | C |
| ATOM | 5542 | CG1 | VAL | C | 402 | 114.535 | 120.563 | -74.482 | 1.00 | 140.00 | C | C |
| ATOM | 5543 | CG2 | VAL | C | 402 | 116.391 | 121.332 | -75.974 | 1.00 | 140.00 | C | C |
| ATOM | 5544 | C   | VAL | C | 402 | 115.970 | 121.324 | -72.139 | 1.00 | 140.00 | C | C |
| ATOM | 5545 | O   | VAL | C | 402 | 115.084 | 121.975 | -71.586 | 1.00 | 140.00 | C | O |
| ATOM | 5546 | N   | PRO | C | 403 | 116.498 | 120.214 | -71.594 | 1.00 | 65.75  | C | N |

|      |      |     |     |   |     |         |         |         |      |        |   |   |
|------|------|-----|-----|---|-----|---------|---------|---------|------|--------|---|---|
| ATOM | 5547 | CA  | PRO | C | 403 | 116.001 | 119.706 | -70.310 | 1.00 | 65.75  | C | C |
| ATOM | 5548 | CD  | PRO | C | 403 | 117.573 | 119.365 | -72.138 | 1.00 | 65.75  | C | C |
| ATOM | 5549 | CB  | PRO | C | 403 | 117.015 | 118.618 | -69.954 | 1.00 | 65.75  | C | C |
| ATOM | 5550 | CG  | PRO | C | 403 | 117.517 | 118.143 | -71.267 | 1.00 | 65.75  | C | C |
| ATOM | 5551 | C   | PRO | C | 403 | 115.980 | 120.780 | -69.226 | 1.00 | 65.75  | C | C |
| ATOM | 5552 | O   | PRO | C | 403 | 115.058 | 120.810 | -68.411 | 1.00 | 65.75  | C | O |
| ATOM | 5553 | N   | VAL | C | 404 | 116.987 | 121.647 | -69.220 | 1.00 | 38.19  | C | N |
| ATOM | 5554 | CA  | VAL | C | 404 | 117.064 | 122.720 | -68.236 | 1.00 | 38.19  | C | C |
| ATOM | 5555 | CB  | VAL | C | 404 | 118.413 | 123.460 | -68.313 | 1.00 | 38.19  | C | C |
| ATOM | 5556 | CG1 | VAL | C | 404 | 118.461 | 124.582 | -67.287 | 1.00 | 38.19  | C | C |
| ATOM | 5557 | CG2 | VAL | C | 404 | 119.562 | 122.488 | -68.100 | 1.00 | 38.19  | C | C |
| ATOM | 5558 | C   | VAL | C | 404 | 115.931 | 123.721 | -68.433 | 1.00 | 38.19  | C | C |
| ATOM | 5559 | O   | VAL | C | 404 | 115.298 | 124.155 | -67.471 | 1.00 | 38.19  | C | O |
| ATOM | 5560 | N   | ILE | C | 405 | 115.680 | 124.082 | -69.687 | 1.00 | 45.11  | C | N |
| ATOM | 5561 | CA  | ILE | C | 405 | 114.608 | 125.012 | -70.019 | 1.00 | 45.11  | C | C |
| ATOM | 5562 | CB  | ILE | C | 405 | 114.654 | 125.412 | -71.507 | 1.00 | 45.11  | C | C |
| ATOM | 5563 | CG2 | ILE | C | 405 | 113.551 | 126.407 | -71.828 | 1.00 | 45.11  | C | C |
| ATOM | 5564 | CG1 | ILE | C | 405 | 116.024 | 125.993 | -71.860 | 1.00 | 45.11  | C | C |
| ATOM | 5565 | CD1 | ILE | C | 405 | 116.155 | 126.416 | -73.308 | 1.00 | 45.11  | C | C |
| ATOM | 5566 | C   | ILE | C | 405 | 113.246 | 124.403 | -69.702 | 1.00 | 45.11  | C | C |
| ATOM | 5567 | O   | ILE | C | 405 | 112.309 | 125.110 | -69.330 | 1.00 | 45.11  | C | O |
| ATOM | 5568 | N   | VAL | C | 406 | 113.146 | 123.086 | -69.850 | 1.00 | 96.58  | C | N |
| ATOM | 5569 | CA  | VAL | C | 406 | 111.903 | 122.374 | -69.578 | 1.00 | 96.58  | C | C |
| ATOM | 5570 | CB  | VAL | C | 406 | 111.998 | 120.894 | -69.994 | 1.00 | 96.58  | C | C |
| ATOM | 5571 | CG1 | VAL | C | 406 | 110.730 | 120.151 | -69.605 | 1.00 | 96.58  | C | C |
| ATOM | 5572 | CG2 | VAL | C | 406 | 112.255 | 120.779 | -71.488 | 1.00 | 96.58  | C | C |
| ATOM | 5573 | C   | VAL | C | 406 | 111.530 | 122.453 | -68.101 | 1.00 | 96.58  | C | C |
| ATOM | 5574 | O   | VAL | C | 406 | 110.380 | 122.722 | -67.756 | 1.00 | 96.58  | C | O |
| ATOM | 5575 | N   | SER | C | 407 | 112.511 | 122.216 | -67.236 | 1.00 | 31.59  | C | N |
| ATOM | 5576 | CA  | SER | C | 407 | 112.290 | 122.256 | -65.795 | 1.00 | 31.59  | C | C |
| ATOM | 5577 | CB  | SER | C | 407 | 113.584 | 121.931 | -65.046 | 1.00 | 31.59  | C | C |
| ATOM | 5578 | OG  | SER | C | 407 | 113.381 | 121.945 | -63.644 | 1.00 | 31.59  | C | O |
| ATOM | 5579 | C   | SER | C | 407 | 111.756 | 123.614 | -65.354 | 1.00 | 31.59  | C | C |
| ATOM | 5580 | O   | SER | C | 407 | 110.927 | 123.702 | -64.448 | 1.00 | 31.59  | C | O |
| ATOM | 5581 | N   | ASN | C | 408 | 112.236 | 124.671 | -66.001 | 1.00 | 49.82  | C | N |
| ATOM | 5582 | CA  | ASN | C | 408 | 111.797 | 126.026 | -65.688 | 1.00 | 49.82  | C | C |
| ATOM | 5583 | CB  | ASN | C | 408 | 112.836 | 127.048 | -66.154 | 1.00 | 49.82  | C | C |
| ATOM | 5584 | CG  | ASN | C | 408 | 114.180 | 126.860 | -65.479 | 1.00 | 49.82  | C | C |
| ATOM | 5585 | OD1 | ASN | C | 408 | 114.255 | 126.415 | -64.334 | 1.00 | 49.82  | C | O |
| ATOM | 5586 | ND2 | ASN | C | 408 | 115.251 | 127.197 | -66.187 | 1.00 | 49.82  | C | N |
| ATOM | 5587 | C   | ASN | C | 408 | 110.437 | 126.340 | -66.301 | 1.00 | 49.82  | C | C |
| ATOM | 5588 | O   | ASN | C | 408 | 109.665 | 127.127 | -65.753 | 1.00 | 49.82  | C | O |
| ATOM | 5589 | N   | PHE | C | 409 | 110.149 | 125.718 | -67.439 | 1.00 | 43.30  | C | N |
| ATOM | 5590 | CA  | PHE | C | 409 | 108.873 | 125.912 | -68.118 | 1.00 | 43.30  | C | C |
| ATOM | 5591 | CB  | PHE | C | 409 | 108.913 | 125.298 | -69.519 | 1.00 | 43.30  | C | C |
| ATOM | 5592 | CG  | PHE | C | 409 | 107.628 | 125.446 | -70.284 | 1.00 | 43.30  | C | C |
| ATOM | 5593 | CD1 | PHE | C | 409 | 107.373 | 126.590 | -71.022 | 1.00 | 43.30  | C | C |
| ATOM | 5594 | CD2 | PHE | C | 409 | 106.676 | 124.440 | -70.267 | 1.00 | 43.30  | C | C |
| ATOM | 5595 | CE1 | PHE | C | 409 | 106.193 | 126.729 | -71.727 | 1.00 | 43.30  | C | C |
| ATOM | 5596 | CE2 | PHE | C | 409 | 105.493 | 124.573 | -70.970 | 1.00 | 43.30  | C | C |
| ATOM | 5597 | CZ  | PHE | C | 409 | 105.252 | 125.719 | -71.701 | 1.00 | 43.30  | C | C |
| ATOM | 5598 | C   | PHE | C | 409 | 107.728 | 125.311 | -67.311 | 1.00 | 43.30  | C | C |
| ATOM | 5599 | O   | PHE | C | 409 | 106.672 | 125.925 | -67.161 | 1.00 | 43.30  | C | O |
| ATOM | 5600 | N   | SER | C | 410 | 107.944 | 124.106 | -66.793 | 1.00 | 71.88  | C | N |
| ATOM | 5601 | CA  | SER | C | 410 | 106.938 | 123.430 | -65.983 | 1.00 | 71.88  | C | C |
| ATOM | 5602 | CB  | SER | C | 410 | 107.300 | 121.955 | -65.796 | 1.00 | 71.88  | C | C |
| ATOM | 5603 | OG  | SER | C | 410 | 107.377 | 121.286 | -67.042 | 1.00 | 71.88  | C | O |
| ATOM | 5604 | C   | SER | C | 410 | 106.789 | 124.110 | -64.626 | 1.00 | 71.88  | C | C |
| ATOM | 5605 | O   | SER | C | 410 | 105.737 | 124.030 | -63.993 | 1.00 | 71.88  | C | O |
| ATOM | 5606 | N   | ARG | C | 411 | 107.850 | 124.780 | -64.188 | 1.00 | 148.46 | C | N |
| ATOM | 5607 | CA  | ARG | C | 411 | 107.838 | 125.490 | -62.915 | 1.00 | 148.46 | C | C |
| ATOM | 5608 | CB  | ARG | C | 411 | 109.255 | 125.915 | -62.527 | 1.00 | 148.46 | C | C |
| ATOM | 5609 | CG  | ARG | C | 411 | 109.337 | 126.690 | -61.222 | 1.00 | 148.46 | C | C |
| ATOM | 5610 | CD  | ARG | C | 411 | 110.769 | 127.094 | -60.910 | 1.00 | 148.46 | C | C |
| ATOM | 5611 | NE  | ARG | C | 411 | 110.865 | 127.854 | -59.667 | 1.00 | 148.46 | C | N |
| ATOM | 5612 | CZ  | ARG | C | 411 | 110.773 | 129.177 | -59.591 | 1.00 | 148.46 | C | C |
| ATOM | 5613 | NH1 | ARG | C | 411 | 110.581 | 129.894 | -60.690 | 1.00 | 148.46 | C | N |
| ATOM | 5614 | NH2 | ARG | C | 411 | 110.872 | 129.786 | -58.417 | 1.00 | 148.46 | C | N |

|      |      |     |     |   |     |         |         |         |      |        |   |   |
|------|------|-----|-----|---|-----|---------|---------|---------|------|--------|---|---|
| ATOM | 5615 | C   | ARG | C | 411 | 106.925 | 126.709 | -62.980 | 1.00 | 148.46 | C | C |
| ATOM | 5616 | O   | ARG | C | 411 | 106.092 | 126.922 | -62.099 | 1.00 | 148.46 | C | O |
| ATOM | 5617 | N   | ILE | C | 412 | 107.088 | 127.507 | -64.031 | 1.00 | 95.71  | C | N |
| ATOM | 5618 | CA  | ILE | C | 412 | 106.272 | 128.700 | -64.224 | 1.00 | 95.71  | C | C |
| ATOM | 5619 | CB  | ILE | C | 412 | 106.815 | 129.574 | -65.371 | 1.00 | 95.71  | C | C |
| ATOM | 5620 | CG2 | ILE | C | 412 | 105.970 | 130.828 | -65.535 | 1.00 | 95.71  | C | C |
| ATOM | 5621 | CG1 | ILE | C | 412 | 108.279 | 129.939 | -65.118 | 1.00 | 95.71  | C | C |
| ATOM | 5622 | CD1 | ILE | C | 412 | 108.502 | 130.719 | -63.840 | 1.00 | 95.71  | C | C |
| ATOM | 5623 | C   | ILE | C | 412 | 104.823 | 128.328 | -64.521 | 1.00 | 95.71  | C | C |
| ATOM | 5624 | O   | ILE | C | 412 | 103.895 | 129.012 | -64.088 | 1.00 | 95.71  | C | O |
| ATOM | 5625 | N   | TYR | C | 413 | 104.638 | 127.240 | -65.260 | 1.00 | 110.37 | C | N |
| ATOM | 5626 | CA  | TYR | C | 413 | 103.304 | 126.774 | -65.618 | 1.00 | 110.37 | C | C |
| ATOM | 5627 | CB  | TYR | C | 413 | 103.391 | 125.595 | -66.589 | 1.00 | 110.37 | C | C |
| ATOM | 5628 | CG  | TYR | C | 413 | 102.048 | 125.093 | -67.070 | 1.00 | 110.37 | C | C |
| ATOM | 5629 | CD1 | TYR | C | 413 | 101.469 | 125.602 | -68.225 | 1.00 | 110.37 | C | C |
| ATOM | 5630 | CD2 | TYR | C | 413 | 101.360 | 124.111 | -66.370 | 1.00 | 110.37 | C | C |
| ATOM | 5631 | CE1 | TYR | C | 413 | 100.242 | 125.147 | -68.669 | 1.00 | 110.37 | C | C |
| ATOM | 5632 | CE2 | TYR | C | 413 | 100.132 | 123.650 | -66.806 | 1.00 | 110.37 | C | C |
| ATOM | 5633 | CZ  | TYR | C | 413 | 99.578  | 124.171 | -67.956 | 1.00 | 110.37 | C | C |
| ATOM | 5634 | OH  | TYR | C | 413 | 98.356  | 123.714 | -68.393 | 1.00 | 110.37 | C | O |
| ATOM | 5635 | C   | TYR | C | 413 | 102.508 | 126.376 | -64.379 | 1.00 | 110.37 | C | C |
| ATOM | 5636 | O   | TYR | C | 413 | 101.364 | 126.796 | -64.204 | 1.00 | 110.37 | C | O |
| ATOM | 5637 | N   | HIS | C | 414 | 103.122 | 125.566 | -63.523 | 1.00 | 72.45  | C | N |
| ATOM | 5638 | CA  | HIS | C | 414 | 102.472 | 125.109 | -62.299 | 1.00 | 72.45  | C | C |
| ATOM | 5639 | ND1 | HIS | C | 414 | 102.882 | 122.480 | -63.750 | 1.00 | 72.45  | C | N |
| ATOM | 5640 | CG  | HIS | C | 414 | 103.380 | 122.751 | -62.520 | 1.00 | 72.45  | C | C |
| ATOM | 5641 | CB  | HIS | C | 414 | 103.271 | 123.971 | -61.659 | 1.00 | 72.45  | C | C |
| ATOM | 5642 | NE2 | HIS | C | 414 | 104.001 | 120.714 | -63.085 | 1.00 | 72.45  | C | N |
| ATOM | 5643 | CD2 | HIS | C | 414 | 104.075 | 121.626 | -62.131 | 1.00 | 72.45  | C | C |
| ATOM | 5644 | CE1 | HIS | C | 414 | 103.283 | 121.207 | -64.078 | 1.00 | 72.45  | C | C |
| ATOM | 5645 | C   | HIS | C | 414 | 102.297 | 126.253 | -61.306 | 1.00 | 72.45  | C | C |
| ATOM | 5646 | O   | HIS | C | 414 | 101.426 | 126.206 | -60.437 | 1.00 | 72.45  | C | O |
| ATOM | 5647 | N   | GLN | C | 415 | 103.131 | 127.279 | -61.440 | 1.00 | 74.19  | C | N |
| ATOM | 5648 | CA  | GLN | C | 415 | 103.063 | 128.441 | -60.563 | 1.00 | 74.19  | C | C |
| ATOM | 5649 | CB  | GLN | C | 415 | 104.326 | 129.293 | -60.702 | 1.00 | 74.19  | C | C |
| ATOM | 5650 | CG  | GLN | C | 415 | 104.345 | 130.528 | -59.816 | 1.00 | 74.19  | C | C |
| ATOM | 5651 | CD  | GLN | C | 415 | 105.624 | 131.327 | -59.962 | 1.00 | 74.19  | C | C |
| ATOM | 5652 | OE1 | GLN | C | 415 | 106.502 | 130.977 | -60.750 | 1.00 | 74.19  | C | O |
| ATOM | 5653 | NE2 | GLN | C | 415 | 105.736 | 132.409 | -59.199 | 1.00 | 74.19  | C | N |
| ATOM | 5654 | C   | GLN | C | 415 | 101.827 | 129.281 | -60.867 | 1.00 | 74.19  | C | C |
| ATOM | 5655 | O   | GLN | C | 415 | 101.190 | 129.819 | -59.961 | 1.00 | 74.19  | C | O |
| ATOM | 5656 | N   | ASN | C | 416 | 101.493 | 129.387 | -62.150 | 1.00 | 34.42  | C | N |
| ATOM | 5657 | CA  | ASN | C | 416 | 100.330 | 130.154 | -62.580 | 1.00 | 34.42  | C | C |
| ATOM | 5658 | CB  | ASN | C | 416 | 100.490 | 130.591 | -64.039 | 1.00 | 34.42  | C | C |
| ATOM | 5659 | CG  | ASN | C | 416 | 99.432  | 131.590 | -64.471 | 1.00 | 34.42  | C | C |
| ATOM | 5660 | ND1 | ASN | C | 416 | 98.313  | 131.591 | -63.957 | 1.00 | 34.42  | C | O |
| ATOM | 5661 | ND2 | ASN | C | 416 | 99.783  | 132.448 | -65.421 | 1.00 | 34.42  | C | N |
| ATOM | 5662 | C   | ASN | C | 416 | 99.039  | 129.360 | -62.404 | 1.00 | 34.42  | C | C |
| ATOM | 5663 | O   | ASN | C | 416 | 98.049  | 129.871 | -61.878 | 1.00 | 34.42  | C | O |
| ATOM | 5664 | N   | GLN | C | 417 | 99.060  | 128.106 | -62.844 | 1.00 | 41.97  | C | N |
| ATOM | 5665 | CA  | GLN | C | 417 | 97.891  | 127.239 | -62.746 | 1.00 | 41.97  | C | C |
| ATOM | 5666 | CB  | GLN | C | 417 | 98.136  | 125.927 | -63.495 | 1.00 | 41.97  | C | C |
| ATOM | 5667 | CG  | GLN | C | 417 | 96.959  | 124.965 | -63.472 | 1.00 | 41.97  | C | C |
| ATOM | 5668 | CD  | GLN | C | 417 | 95.761  | 125.486 | -64.243 | 1.00 | 41.97  | C | C |
| ATOM | 5669 | OE1 | GLN | C | 417 | 95.999  | 126.444 | -65.131 | 1.00 | 41.97  | C | O |
| ATOM | 5670 | NE2 | GLN | C | 417 | 94.635  | 125.028 | -64.047 | 1.00 | 41.97  | C | N |
| ATOM | 5671 | C   | GLN | C | 417 | 97.538  | 126.954 | -61.290 | 1.00 | 41.97  | C | C |
| ATOM | 5672 | O   | GLN | C | 417 | 98.408  | 126.920 | -60.421 | 1.00 | 41.97  | C | O |
| ATOM | 5673 | OXT | GLN | C | 417 | 96.374  | 126.750 | -60.946 | 1.00 | 41.97  | C | O |
| TER  |      |     |     |   |     |         |         |         |      |        |   |   |
| ATOM | 5674 | N   | PHE | D | 175 | 147.910 | 136.865 | -69.219 | 1.00 | 80.84  | D | N |
| ATOM | 5675 | CA  | PHE | D | 175 | 147.759 | 135.883 | -70.286 | 1.00 | 80.84  | D | C |
| ATOM | 5676 | CB  | PHE | D | 175 | 149.125 | 135.337 | -70.708 | 1.00 | 80.84  | D | C |
| ATOM | 5677 | CG  | PHE | D | 175 | 150.073 | 136.393 | -71.198 | 1.00 | 80.84  | D | C |
| ATOM | 5678 | CD1 | PHE | D | 175 | 150.076 | 136.777 | -72.529 | 1.00 | 80.84  | D | C |
| ATOM | 5679 | CD2 | PHE | D | 175 | 150.961 | 137.004 | -70.328 | 1.00 | 80.84  | D | C |
| ATOM | 5680 | CE1 | PHE | D | 175 | 150.947 | 137.749 | -72.983 | 1.00 | 80.84  | D | C |
| ATOM | 5681 | CE2 | PHE | D | 175 | 151.835 | 137.976 | -70.776 | 1.00 | 80.84  | D | C |

|      |      |     |     |   |     |         |         |         |      |        |   |   |
|------|------|-----|-----|---|-----|---------|---------|---------|------|--------|---|---|
| ATOM | 5682 | CZ  | PHE | D | 175 | 151.827 | 138.349 | -72.105 | 1.00 | 80.84  | D | C |
| ATOM | 5683 | C   | PHE | D | 175 | 146.848 | 134.738 | -69.856 | 1.00 | 80.84  | D | C |
| ATOM | 5684 | O   | PHE | D | 175 | 146.375 | 133.963 | -70.686 | 1.00 | 80.84  | D | O |
| ATOM | 5685 | N   | GLU | D | 176 | 146.606 | 134.640 | -68.553 | 1.00 | 133.93 | D | N |
| ATOM | 5686 | CA  | GLU | D | 176 | 145.752 | 133.591 | -68.010 | 1.00 | 133.93 | D | C |
| ATOM | 5687 | CB  | GLU | D | 176 | 146.543 | 132.699 | -67.050 | 1.00 | 133.93 | D | C |
| ATOM | 5688 | CG  | GLU | D | 176 | 147.732 | 131.999 | -67.688 | 1.00 | 133.93 | D | C |
| ATOM | 5689 | CD  | GLU | D | 176 | 148.484 | 131.116 | -66.711 | 1.00 | 133.93 | D | C |
| ATOM | 5690 | OE1 | GLU | D | 176 | 148.079 | 131.055 | -65.531 | 1.00 | 133.93 | D | O |
| ATOM | 5691 | OE2 | GLU | D | 176 | 149.479 | 130.484 | -67.122 | 1.00 | 133.93 | D | O |
| ATOM | 5692 | C   | GLU | D | 176 | 144.541 | 134.184 | -67.297 | 1.00 | 133.93 | D | C |
| ATOM | 5693 | O   | GLU | D | 176 | 143.525 | 133.513 | -67.114 | 1.00 | 133.93 | D | O |
| ATOM | 5694 | N   | ASN | D | 177 | 144.656 | 135.447 | -66.899 | 1.00 | 62.69  | D | N |
| ATOM | 5695 | CA  | ASN | D | 177 | 143.574 | 136.132 | -66.202 | 1.00 | 62.69  | D | C |
| ATOM | 5696 | CB  | ASN | D | 177 | 143.905 | 136.281 | -64.716 | 1.00 | 62.69  | D | C |
| ATOM | 5697 | CG  | ASN | D | 177 | 144.130 | 134.947 | -64.032 | 1.00 | 62.69  | D | C |
| ATOM | 5698 | OD1 | ASN | D | 177 | 143.197 | 134.340 | -63.506 | 1.00 | 62.69  | D | O |
| ATOM | 5699 | ND2 | ASN | D | 177 | 145.374 | 134.482 | -64.036 | 1.00 | 62.69  | D | N |
| ATOM | 5700 | C   | ASN | D | 177 | 143.268 | 137.497 | -66.811 | 1.00 | 62.69  | D | C |
| ATOM | 5701 | O   | ASN | D | 177 | 143.780 | 138.516 | -66.348 | 1.00 | 62.69  | D | O |
| ATOM | 5702 | N   | PRO | D | 178 | 142.430 | 137.517 | -67.857 | 1.00 | 73.65  | D | N |
| ATOM | 5703 | CA  | PRO | D | 178 | 142.033 | 138.751 | -68.545 | 1.00 | 73.65  | D | C |
| ATOM | 5704 | CD  | PRO | D | 178 | 141.851 | 136.321 | -68.493 | 1.00 | 73.65  | D | C |
| ATOM | 5705 | CB  | PRO | D | 178 | 141.073 | 138.252 | -69.630 | 1.00 | 73.65  | D | C |
| ATOM | 5706 | CG  | PRO | D | 178 | 141.444 | 136.824 | -69.841 | 1.00 | 73.65  | D | C |
| ATOM | 5707 | C   | PRO | D | 178 | 141.307 | 139.719 | -67.616 | 1.00 | 73.65  | D | C |
| ATOM | 5708 | O   | PRO | D | 178 | 141.160 | 140.895 | -67.947 | 1.00 | 73.65  | D | O |
| ATOM | 5709 | N   | HIS | D | 179 | 140.858 | 139.224 | -66.467 | 1.00 | 64.97  | D | N |
| ATOM | 5710 | CA  | HIS | D | 179 | 140.129 | 140.049 | -65.510 | 1.00 | 64.97  | D | C |
| ATOM | 5711 | ND1 | HIS | D | 179 | 138.399 | 137.615 | -66.536 | 1.00 | 64.97  | D | N |
| ATOM | 5712 | CG  | HIS | D | 179 | 138.093 | 138.536 | -65.557 | 1.00 | 64.97  | D | C |
| ATOM | 5713 | CB  | HIS | D | 179 | 139.138 | 139.197 | -64.713 | 1.00 | 64.97  | D | C |
| ATOM | 5714 | NE2 | HIS | D | 179 | 136.267 | 137.821 | -66.544 | 1.00 | 64.97  | D | N |
| ATOM | 5715 | CD2 | HIS | D | 179 | 136.745 | 138.661 | -65.567 | 1.00 | 64.97  | D | C |
| ATOM | 5716 | CE1 | HIS | D | 179 | 137.285 | 137.202 | -67.113 | 1.00 | 64.97  | D | C |
| ATOM | 5717 | C   | HIS | D | 179 | 141.071 | 140.780 | -64.559 | 1.00 | 64.97  | D | C |
| ATOM | 5718 | O   | HIS | D | 179 | 140.627 | 141.434 | -63.615 | 1.00 | 64.97  | D | O |
| ATOM | 5719 | N   | THR | D | 180 | 142.371 | 140.666 | -64.811 | 1.00 | 98.23  | D | N |
| ATOM | 5720 | CA  | THR | D | 180 | 143.371 | 141.321 | -63.975 | 1.00 | 98.23  | D | C |
| ATOM | 5721 | CB  | THR | D | 180 | 144.792 | 140.818 | -64.289 | 1.00 | 98.23  | D | C |
| ATOM | 5722 | OG1 | THR | D | 180 | 144.888 | 139.423 | -63.977 | 1.00 | 98.23  | D | O |
| ATOM | 5723 | CG2 | THR | D | 180 | 145.820 | 141.586 | -63.472 | 1.00 | 98.23  | D | C |
| ATOM | 5724 | C   | THR | D | 180 | 143.329 | 142.837 | -64.142 | 1.00 | 98.23  | D | C |
| ATOM | 5725 | O   | THR | D | 180 | 143.224 | 143.576 | -63.163 | 1.00 | 98.23  | D | O |
| ATOM | 5726 | N   | SER | D | 181 | 143.411 | 143.293 | -65.387 | 1.00 | 37.88  | D | N |
| ATOM | 5727 | CA  | SER | D | 181 | 143.387 | 144.720 | -65.682 | 1.00 | 37.88  | D | C |
| ATOM | 5728 | CB  | SER | D | 181 | 144.796 | 145.310 | -65.588 | 1.00 | 37.88  | D | C |
| ATOM | 5729 | OG  | SER | D | 181 | 145.677 | 144.674 | -66.498 | 1.00 | 37.88  | D | O |
| ATOM | 5730 | C   | SER | D | 181 | 142.798 | 144.989 | -67.062 | 1.00 | 37.88  | D | C |
| ATOM | 5731 | O   | SER | D | 181 | 142.346 | 144.070 | -67.744 | 1.00 | 37.88  | D | O |
| ATOM | 5732 | N   | THR | D | 182 | 142.806 | 146.255 | -67.466 | 1.00 | 92.23  | D | N |
| ATOM | 5733 | CA  | THR | D | 182 | 142.281 | 146.648 | -68.768 | 1.00 | 92.23  | D | C |
| ATOM | 5734 | CB  | THR | D | 182 | 142.204 | 148.179 | -68.908 | 1.00 | 92.23  | D | C |
| ATOM | 5735 | OG1 | THR | D | 182 | 141.350 | 148.713 | -67.888 | 1.00 | 92.23  | D | O |
| ATOM | 5736 | CG2 | THR | D | 182 | 141.654 | 148.563 | -70.274 | 1.00 | 92.23  | D | C |
| ATOM | 5737 | C   | THR | D | 182 | 143.138 | 146.085 | -69.897 | 1.00 | 92.23  | D | C |
| ATOM | 5738 | O   | THR | D | 182 | 142.617 | 145.557 | -70.880 | 1.00 | 92.23  | D | O |
| ATOM | 5739 | N   | MET | D | 183 | 144.454 | 146.202 | -69.749 | 1.00 | 58.27  | D | N |
| ATOM | 5740 | CA  | MET | D | 183 | 145.385 | 145.693 | -70.749 | 1.00 | 58.27  | D | C |
| ATOM | 5741 | CB  | MET | D | 183 | 146.823 | 146.063 | -70.382 | 1.00 | 58.27  | D | C |
| ATOM | 5742 | CG  | MET | D | 183 | 147.076 | 147.560 | -70.296 | 1.00 | 58.27  | D | C |
| ATOM | 5743 | SD  | MET | D | 183 | 148.787 | 147.959 | -69.891 | 1.00 | 58.27  | D | S |
| ATOM | 5744 | CE  | MET | D | 183 | 149.646 | 147.217 | -71.277 | 1.00 | 58.27  | D | C |
| ATOM | 5745 | C   | MET | D | 183 | 145.252 | 144.181 | -70.896 | 1.00 | 58.27  | D | C |
| ATOM | 5746 | O   | MET | D | 183 | 145.442 | 143.634 | -71.982 | 1.00 | 58.27  | D | O |
| ATOM | 5747 | N   | ALA | D | 184 | 144.924 | 143.512 | -69.796 | 1.00 | 28.36  | D | N |
| ATOM | 5748 | CA  | ALA | D | 184 | 144.733 | 142.067 | -69.807 | 1.00 | 28.36  | D | C |
| ATOM | 5749 | CB  | ALA | D | 184 | 144.619 | 141.535 | -68.388 | 1.00 | 28.36  | D | C |



|      |      |     |     |   |     |         |         |         |      |        |   |   |
|------|------|-----|-----|---|-----|---------|---------|---------|------|--------|---|---|
| ATOM | 5750 | C   | ALA | D | 184 | 143.497 | 141.695 | -70.618 | 1.00 | 28.36  | D | C |
| ATOM | 5751 | O   | ALA | D | 184 | 143.432 | 140.619 | -71.213 | 1.00 | 28.36  | D | O |
| ATOM | 5752 | N   | LEU | D | 185 | 142.517 | 142.593 | -70.637 | 1.00 | 114.45 | D | N |
| ATOM | 5753 | CA  | LEU | D | 185 | 141.292 | 142.374 | -71.394 | 1.00 | 114.45 | D | C |
| ATOM | 5754 | CB  | LEU | D | 185 | 140.163 | 143.256 | -70.855 | 1.00 | 114.45 | D | C |
| ATOM | 5755 | CG  | LEU | D | 185 | 138.780 | 143.057 | -71.479 | 1.00 | 114.45 | D | C |
| ATOM | 5756 | CD1 | LEU | D | 185 | 138.314 | 141.620 | -71.305 | 1.00 | 114.45 | D | C |
| ATOM | 5757 | CD2 | LEU | D | 185 | 137.776 | 144.026 | -70.875 | 1.00 | 114.45 | D | C |
| ATOM | 5758 | C   | LEU | D | 185 | 141.518 | 142.655 | -72.876 | 1.00 | 114.45 | D | C |
| ATOM | 5759 | O   | LEU | D | 185 | 140.833 | 142.101 | -73.735 | 1.00 | 114.45 | D | O |
| ATOM | 5760 | N   | VAL | D | 186 | 142.484 | 143.520 | -73.167 | 1.00 | 33.25  | D | N |
| ATOM | 5761 | CA  | VAL | D | 186 | 142.825 | 143.852 | -74.545 | 1.00 | 33.25  | D | C |
| ATOM | 5762 | CB  | VAL | D | 186 | 143.855 | 144.994 | -74.614 | 1.00 | 33.25  | D | C |
| ATOM | 5763 | CG1 | VAL | D | 186 | 144.273 | 145.245 | -76.054 | 1.00 | 33.25  | D | C |
| ATOM | 5764 | CG2 | VAL | D | 186 | 143.285 | 146.259 | -73.990 | 1.00 | 33.25  | D | C |
| ATOM | 5765 | C   | VAL | D | 186 | 143.380 | 142.630 | -75.268 | 1.00 | 33.25  | D | C |
| ATOM | 5766 | O   | VAL | D | 186 | 142.973 | 142.319 | -76.387 | 1.00 | 33.25  | D | O |
| ATOM | 5767 | N   | PHE | D | 187 | 144.310 | 141.940 | -74.616 | 1.00 | 90.63  | D | N |
| ATOM | 5768 | CA  | PHE | D | 187 | 144.911 | 140.737 | -75.177 | 1.00 | 90.63  | D | C |
| ATOM | 5769 | CB  | PHE | D | 187 | 146.038 | 140.234 | -74.272 | 1.00 | 90.63  | D | C |
| ATOM | 5770 | CG  | PHE | D | 187 | 146.763 | 139.035 | -74.813 | 1.00 | 90.63  | D | C |
| ATOM | 5771 | CD1 | PHE | D | 187 | 147.803 | 139.187 | -75.714 | 1.00 | 90.63  | D | C |
| ATOM | 5772 | CD2 | PHE | D | 187 | 146.408 | 137.756 | -74.416 | 1.00 | 90.63  | D | C |
| ATOM | 5773 | CE1 | PHE | D | 187 | 148.474 | 138.086 | -76.212 | 1.00 | 90.63  | D | C |
| ATOM | 5774 | CE2 | PHE | D | 187 | 147.075 | 136.651 | -74.911 | 1.00 | 90.63  | D | C |
| ATOM | 5775 | CZ  | PHE | D | 187 | 148.110 | 136.817 | -75.811 | 1.00 | 90.63  | D | C |
| ATOM | 5776 | C   | PHE | D | 187 | 143.862 | 139.646 | -75.371 | 1.00 | 90.63  | D | C |
| ATOM | 5777 | O   | PHE | D | 187 | 144.048 | 138.726 | -76.167 | 1.00 | 90.63  | D | O |
| ATOM | 5778 | N   | TYR | D | 188 | 142.759 | 139.758 | -74.638 | 1.00 | 111.20 | D | N |
| ATOM | 5779 | CA  | TYR | D | 188 | 141.671 | 138.792 | -74.731 | 1.00 | 111.20 | D | C |
| ATOM | 5780 | CB  | TYR | D | 188 | 140.692 | 138.977 | -73.570 | 1.00 | 111.20 | D | C |
| ATOM | 5781 | CG  | TYR | D | 188 | 139.513 | 138.029 | -73.595 | 1.00 | 111.20 | D | C |
| ATOM | 5782 | CD1 | TYR | D | 188 | 139.600 | 136.766 | -73.025 | 1.00 | 111.20 | D | C |
| ATOM | 5783 | CD2 | TYR | D | 188 | 138.311 | 138.400 | -74.183 | 1.00 | 111.20 | D | C |
| ATOM | 5784 | CE1 | TYR | D | 188 | 138.524 | 135.898 | -73.044 | 1.00 | 111.20 | D | C |
| ATOM | 5785 | CE2 | TYR | D | 188 | 137.231 | 137.539 | -74.207 | 1.00 | 111.20 | D | C |
| ATOM | 5786 | CZ  | TYR | D | 188 | 137.343 | 136.290 | -73.636 | 1.00 | 111.20 | D | C |
| ATOM | 5787 | OH  | TYR | D | 188 | 136.269 | 135.430 | -73.658 | 1.00 | 111.20 | D | O |
| ATOM | 5788 | C   | TYR | D | 188 | 140.940 | 138.914 | -76.064 | 1.00 | 111.20 | D | C |
| ATOM | 5789 | O   | TYR | D | 188 | 140.658 | 137.911 | -76.721 | 1.00 | 111.20 | D | O |
| ATOM | 5790 | N   | TYR | D | 189 | 140.634 | 140.146 | -76.459 | 1.00 | 99.31  | D | N |
| ATOM | 5791 | CA  | TYR | D | 189 | 139.946 | 140.395 | -77.721 | 1.00 | 99.31  | D | C |
| ATOM | 5792 | CB  | TYR | D | 189 | 139.303 | 141.784 | -77.722 | 1.00 | 99.31  | D | C |
| ATOM | 5793 | CG  | TYR | D | 189 | 138.114 | 141.911 | -76.796 | 1.00 | 99.31  | D | C |
| ATOM | 5794 | CD1 | TYR | D | 189 | 138.271 | 142.349 | -75.488 | 1.00 | 99.31  | D | C |
| ATOM | 5795 | CD2 | TYR | D | 189 | 136.835 | 141.593 | -77.230 | 1.00 | 99.31  | D | C |
| ATOM | 5796 | CE1 | TYR | D | 189 | 137.186 | 142.467 | -74.639 | 1.00 | 99.31  | D | C |
| ATOM | 5797 | CE2 | TYR | D | 189 | 135.745 | 141.707 | -76.389 | 1.00 | 99.31  | D | C |
| ATOM | 5798 | CZ  | TYR | D | 189 | 135.926 | 142.144 | -75.094 | 1.00 | 99.31  | D | C |
| ATOM | 5799 | OH  | TYR | D | 189 | 134.843 | 142.259 | -74.253 | 1.00 | 99.31  | D | O |
| ATOM | 5800 | C   | TYR | D | 189 | 140.890 | 140.250 | -78.911 | 1.00 | 99.31  | D | C |
| ATOM | 5801 | O   | TYR | D | 189 | 140.506 | 139.725 | -79.956 | 1.00 | 99.31  | D | O |
| ATOM | 5802 | N   | VAL | D | 190 | 142.122 | 140.720 | -78.748 | 1.00 | 25.67  | D | N |
| ATOM | 5803 | CA  | VAL | D | 190 | 143.125 | 140.620 | -79.803 | 1.00 | 25.67  | D | C |
| ATOM | 5804 | CB  | VAL | D | 190 | 144.474 | 141.218 | -79.363 | 1.00 | 25.67  | D | C |
| ATOM | 5805 | CG1 | VAL | D | 190 | 145.551 | 140.912 | -80.392 | 1.00 | 25.67  | D | C |
| ATOM | 5806 | CG2 | VAL | D | 190 | 144.345 | 142.719 | -79.147 | 1.00 | 25.67  | D | C |
| ATOM | 5807 | C   | VAL | D | 190 | 143.331 | 139.169 | -80.224 | 1.00 | 25.67  | D | C |
| ATOM | 5808 | O   | VAL | D | 190 | 143.330 | 138.852 | -81.413 | 1.00 | 25.67  | D | O |
| ATOM | 5809 | N   | THR | D | 191 | 143.505 | 138.292 | -79.240 | 1.00 | 113.27 | D | N |
| ATOM | 5810 | CA  | THR | D | 191 | 143.692 | 136.871 | -79.506 | 1.00 | 113.27 | D | C |
| ATOM | 5811 | CB  | THR | D | 191 | 143.931 | 136.080 | -78.206 | 1.00 | 113.27 | D | C |
| ATOM | 5812 | OG1 | THR | D | 191 | 145.117 | 136.560 | -77.562 | 1.00 | 113.27 | D | O |
| ATOM | 5813 | CG2 | THR | D | 191 | 144.087 | 134.597 | -78.506 | 1.00 | 113.27 | D | C |
| ATOM | 5814 | C   | THR | D | 191 | 142.483 | 136.289 | -80.230 | 1.00 | 113.27 | D | C |
| ATOM | 5815 | O   | THR | D | 191 | 142.625 | 135.620 | -81.253 | 1.00 | 113.27 | D | O |
| ATOM | 5816 | N   | GLY | D | 192 | 141.296 | 136.553 | -79.694 | 1.00 | 21.76  | D | N |
| ATOM | 5817 | CA  | GLY | D | 192 | 140.063 | 136.054 | -80.275 | 1.00 | 21.76  | D | C |

|      |      |     |     |   |     |         |         |         |      |        |   |   |
|------|------|-----|-----|---|-----|---------|---------|---------|------|--------|---|---|
| ATOM | 5818 | C   | GLY | D | 192 | 139.893 | 136.439 | -81.732 | 1.00 | 21.76  | D | C |
| ATOM | 5819 | O   | GLY | D | 192 | 139.246 | 135.726 | -82.499 | 1.00 | 21.76  | D | O |
| ATOM | 5820 | N   | PHE | D | 193 | 140.475 | 137.571 | -82.114 | 1.00 | 45.84  | D | N |
| ATOM | 5821 | CA  | PHE | D | 193 | 140.401 | 138.042 | -83.492 | 1.00 | 45.84  | D | C |
| ATOM | 5822 | CB  | PHE | D | 193 | 140.822 | 139.510 | -83.585 | 1.00 | 45.84  | D | C |
| ATOM | 5823 | CG  | PHE | D | 193 | 139.877 | 140.457 | -82.901 | 1.00 | 45.84  | D | C |
| ATOM | 5824 | CD1 | PHE | D | 193 | 138.574 | 140.078 | -82.624 | 1.00 | 45.84  | D | C |
| ATOM | 5825 | CD2 | PHE | D | 193 | 140.291 | 141.727 | -82.537 | 1.00 | 45.84  | D | C |
| ATOM | 5826 | CE1 | PHE | D | 193 | 137.703 | 140.947 | -81.995 | 1.00 | 45.84  | D | C |
| ATOM | 5827 | CE2 | PHE | D | 193 | 139.424 | 142.601 | -81.908 | 1.00 | 45.84  | D | C |
| ATOM | 5828 | CZ  | PHE | D | 193 | 138.129 | 142.210 | -81.637 | 1.00 | 45.84  | D | C |
| ATOM | 5829 | C   | PHE | D | 193 | 141.259 | 137.185 | -84.417 | 1.00 | 45.84  | D | C |
| ATOM | 5830 | O   | PHE | D | 193 | 140.810 | 136.770 | -85.485 | 1.00 | 45.84  | D | O |
| ATOM | 5831 | N   | PHE | D | 194 | 142.495 | 136.923 | -84.002 | 1.00 | 127.60 | D | N |
| ATOM | 5832 | CA  | PHE | D | 194 | 143.404 | 136.094 | -84.786 | 1.00 | 127.60 | D | C |
| ATOM | 5833 | CB  | PHE | D | 194 | 144.802 | 136.082 | -84.161 | 1.00 | 127.60 | D | C |
| ATOM | 5834 | CG  | PHE | D | 194 | 145.570 | 137.357 | -84.366 | 1.00 | 127.60 | D | C |
| ATOM | 5835 | CD1 | PHE | D | 194 | 145.488 | 138.388 | -83.446 | 1.00 | 127.60 | D | C |
| ATOM | 5836 | CD2 | PHE | D | 194 | 146.377 | 137.522 | -85.480 | 1.00 | 127.60 | D | C |
| ATOM | 5837 | CE1 | PHE | D | 194 | 146.194 | 139.561 | -83.634 | 1.00 | 127.60 | D | C |
| ATOM | 5838 | CE2 | PHE | D | 194 | 147.086 | 138.692 | -85.673 | 1.00 | 127.60 | D | C |
| ATOM | 5839 | CZ  | PHE | D | 194 | 146.994 | 139.713 | -84.748 | 1.00 | 127.60 | D | C |
| ATOM | 5840 | C   | PHE | D | 194 | 142.878 | 134.670 | -84.929 | 1.00 | 127.60 | D | C |
| ATOM | 5841 | O   | PHE | D | 194 | 143.128 | 134.005 | -85.935 | 1.00 | 127.60 | D | O |
| ATOM | 5842 | N   | ILE | D | 195 | 142.151 | 134.206 | -83.918 | 1.00 | 36.34  | D | N |
| ATOM | 5843 | CA  | ILE | D | 195 | 141.566 | 132.871 | -83.948 | 1.00 | 36.34  | D | C |
| ATOM | 5844 | CB  | ILE | D | 195 | 140.984 | 132.477 | -82.578 | 1.00 | 36.34  | D | C |
| ATOM | 5845 | CG2 | ILE | D | 195 | 140.488 | 131.039 | -82.604 | 1.00 | 36.34  | D | C |
| ATOM | 5846 | CG1 | ILE | D | 195 | 142.028 | 132.666 | -81.478 | 1.00 | 36.34  | D | C |
| ATOM | 5847 | CD1 | ILE | D | 195 | 141.497 | 132.408 | -80.085 | 1.00 | 36.34  | D | C |
| ATOM | 5848 | C   | ILE | D | 195 | 140.461 | 132.797 | -84.995 | 1.00 | 36.34  | D | C |
| ATOM | 5849 | O   | ILE | D | 195 | 140.281 | 131.773 | -85.653 | 1.00 | 36.34  | D | O |
| ATOM | 5850 | N   | ALA | D | 196 | 139.724 | 133.893 | -85.143 | 1.00 | 30.78  | D | N |
| ATOM | 5851 | CA  | ALA | D | 196 | 138.643 | 133.963 | -86.118 | 1.00 | 30.78  | D | C |
| ATOM | 5852 | CB  | ALA | D | 196 | 137.707 | 135.115 | -85.788 | 1.00 | 30.78  | D | C |
| ATOM | 5853 | C   | ALA | D | 196 | 139.192 | 134.109 | -87.533 | 1.00 | 30.78  | D | C |
| ATOM | 5854 | O   | ALA | D | 196 | 138.752 | 133.421 | -88.454 | 1.00 | 30.78  | D | O |
| ATOM | 5855 | N   | VAL | D | 197 | 140.158 | 135.009 | -87.697 | 1.00 | 86.02  | D | N |
| ATOM | 5856 | CA  | VAL | D | 197 | 140.770 | 135.251 | -88.998 | 1.00 | 86.02  | D | C |
| ATOM | 5857 | CB  | VAL | D | 197 | 141.805 | 136.392 | -88.932 | 1.00 | 86.02  | D | C |
| ATOM | 5858 | CG1 | VAL | D | 197 | 142.500 | 136.559 | -90.275 | 1.00 | 86.02  | D | C |
| ATOM | 5859 | CG2 | VAL | D | 197 | 141.137 | 137.690 | -88.506 | 1.00 | 86.02  | D | C |
| ATOM | 5860 | C   | VAL | D | 197 | 141.441 | 133.992 | -89.539 | 1.00 | 86.02  | D | C |
| ATOM | 5861 | O   | VAL | D | 197 | 141.370 | 133.703 | -90.733 | 1.00 | 86.02  | D | O |
| ATOM | 5862 | N   | SER | D | 198 | 142.090 | 133.245 | -88.652 | 1.00 | 41.44  | D | N |
| ATOM | 5863 | CA  | SER | D | 198 | 142.772 | 132.015 | -89.041 | 1.00 | 41.44  | D | C |
| ATOM | 5864 | CB  | SER | D | 198 | 143.559 | 131.440 | -87.861 | 1.00 | 41.44  | D | C |
| ATOM | 5865 | OG  | SER | D | 198 | 142.701 | 131.119 | -86.781 | 1.00 | 41.44  | D | O |
| ATOM | 5866 | C   | SER | D | 198 | 141.785 | 130.979 | -89.571 | 1.00 | 41.44  | D | C |
| ATOM | 5867 | O   | SER | D | 198 | 142.132 | 130.157 | -90.420 | 1.00 | 41.44  | D | O |
| ATOM | 5868 | N   | VAL | D | 199 | 140.556 | 131.023 | -89.066 | 1.00 | 108.02 | D | N |
| ATOM | 5869 | CA  | VAL | D | 199 | 139.513 | 130.102 | -89.503 | 1.00 | 108.02 | D | C |
| ATOM | 5870 | CB  | VAL | D | 199 | 138.419 | 129.934 | -88.431 | 1.00 | 108.02 | D | C |
| ATOM | 5871 | CG1 | VAL | D | 199 | 137.284 | 129.069 | -88.961 | 1.00 | 108.02 | D | C |
| ATOM | 5872 | CG2 | VAL | D | 199 | 139.006 | 129.334 | -87.163 | 1.00 | 108.02 | D | C |
| ATOM | 5873 | C   | VAL | D | 199 | 138.872 | 130.572 | -90.805 | 1.00 | 108.02 | D | C |
| ATOM | 5874 | O   | VAL | D | 199 | 138.660 | 129.781 | -91.725 | 1.00 | 108.02 | D | O |
| ATOM | 5875 | N   | ILE | D | 200 | 138.567 | 131.864 | -90.877 | 1.00 | 89.21  | D | N |
| ATOM | 5876 | CA  | ILE | D | 200 | 137.966 | 132.444 | -92.073 | 1.00 | 89.21  | D | C |
| ATOM | 5877 | CB  | ILE | D | 200 | 137.620 | 133.931 | -91.870 | 1.00 | 89.21  | D | C |
| ATOM | 5878 | CG2 | ILE | D | 200 | 137.040 | 134.522 | -93.145 | 1.00 | 89.21  | D | C |
| ATOM | 5879 | CG1 | ILE | D | 200 | 136.639 | 134.096 | -90.708 | 1.00 | 89.21  | D | C |
| ATOM | 5880 | CD1 | ILE | D | 200 | 135.326 | 133.373 | -90.912 | 1.00 | 89.21  | D | C |
| ATOM | 5881 | C   | ILE | D | 200 | 138.895 | 132.304 | -93.274 | 1.00 | 89.21  | D | C |
| ATOM | 5882 | O   | ILE | D | 200 | 138.478 | 131.864 | -94.345 | 1.00 | 89.21  | D | O |
| ATOM | 5883 | N   | ALA | D | 201 | 140.156 | 132.679 | -93.086 | 1.00 | 33.80  | D | N |
| ATOM | 5884 | CA  | ALA | D | 201 | 141.152 | 132.572 | -94.146 | 1.00 | 33.80  | D | C |
| ATOM | 5885 | CB  | ALA | D | 201 | 142.478 | 133.163 | -93.692 | 1.00 | 33.80  | D | C |

|      |      |     |     |   |     |         |         |          |      |        |   |   |
|------|------|-----|-----|---|-----|---------|---------|----------|------|--------|---|---|
| ATOM | 5886 | C   | ALA | D | 201 | 141.333 | 131.121 | -94.575  | 1.00 | 33.80  | D | C |
| ATOM | 5887 | O   | ALA | D | 201 | 141.546 | 130.835 | -95.753  | 1.00 | 33.80  | D | O |
| ATOM | 5888 | N   | ASN | D | 202 | 141.246 | 130.209 | -93.611  | 1.00 | 47.57  | D | N |
| ATOM | 5889 | CA  | ASN | D | 202 | 141.361 | 128.783 | -93.891  | 1.00 | 47.57  | D | C |
| ATOM | 5890 | CB  | ASN | D | 202 | 141.199 | 127.972 | -92.603  | 1.00 | 47.57  | D | C |
| ATOM | 5891 | CG  | ASN | D | 202 | 141.550 | 126.507 | -92.784  | 1.00 | 47.57  | D | C |
| ATOM | 5892 | OD1 | ASN | D | 202 | 141.378 | 125.941 | -93.863  | 1.00 | 47.57  | D | O |
| ATOM | 5893 | ND2 | ASN | D | 202 | 142.046 | 125.884 | -91.721  | 1.00 | 47.57  | D | N |
| ATOM | 5894 | C   | ASN | D | 202 | 140.332 | 128.344 | -94.926  | 1.00 | 47.57  | D | C |
| ATOM | 5895 | O   | ASN | D | 202 | 140.639 | 127.575 | -95.837  | 1.00 | 47.57  | D | O |
| ATOM | 5896 | N   | VAL | D | 203 | 139.109 | 128.845 | -94.782  | 1.00 | 47.39  | D | N |
| ATOM | 5897 | CA  | VAL | D | 203 | 138.035 | 128.530 | -95.715  | 1.00 | 47.39  | D | C |
| ATOM | 5898 | CB  | VAL | D | 203 | 136.675 | 129.039 | -95.199  | 1.00 | 47.39  | D | C |
| ATOM | 5899 | CG1 | VAL | D | 203 | 135.570 | 128.701 | -96.187  | 1.00 | 47.39  | D | C |
| ATOM | 5900 | CG2 | VAL | D | 203 | 136.373 | 128.449 | -93.830  | 1.00 | 47.39  | D | C |
| ATOM | 5901 | C   | VAL | D | 203 | 138.312 | 129.137 | -97.087  | 1.00 | 47.39  | D | C |
| ATOM | 5902 | O   | VAL | D | 203 | 138.013 | 128.531 | -98.117  | 1.00 | 47.39  | D | O |
| ATOM | 5903 | N   | VAL | D | 204 | 138.888 | 130.334 | -97.093  | 1.00 | 117.92 | D | N |
| ATOM | 5904 | CA  | VAL | D | 204 | 139.204 | 131.027 | -98.337  | 1.00 | 117.92 | D | C |
| ATOM | 5905 | CB  | VAL | D | 204 | 139.641 | 132.482 | -98.078  | 1.00 | 117.92 | D | C |
| ATOM | 5906 | CG1 | VAL | D | 204 | 139.866 | 133.213 | -99.393  | 1.00 | 117.92 | D | C |
| ATOM | 5907 | CG2 | VAL | D | 204 | 138.601 | 133.205 | -97.238  | 1.00 | 117.92 | D | C |
| ATOM | 5908 | C   | VAL | D | 204 | 140.303 | 130.298 | -99.106  | 1.00 | 117.92 | D | C |
| ATOM | 5909 | O   | VAL | D | 204 | 140.368 | 130.371 | -100.333 | 1.00 | 117.92 | D | O |
| ATOM | 5910 | N   | GLU | D | 205 | 141.163 | 129.594 | -98.378  | 1.00 | 86.49  | D | N |
| ATOM | 5911 | CA  | GLU | D | 205 | 142.241 | 128.832 | -98.997  | 1.00 | 86.49  | D | C |
| ATOM | 5912 | CB  | GLU | D | 205 | 143.209 | 128.308 | -97.935  | 1.00 | 86.49  | D | C |
| ATOM | 5913 | CG  | GLU | D | 205 | 143.919 | 129.394 | -97.144  | 1.00 | 86.49  | D | C |
| ATOM | 5914 | CD  | GLU | D | 205 | 144.859 | 128.828 | -96.098  | 1.00 | 86.49  | D | C |
| ATOM | 5915 | OE1 | GLU | D | 205 | 144.953 | 127.587 | -95.993  | 1.00 | 86.49  | D | O |
| ATOM | 5916 | OE2 | GLU | D | 205 | 145.503 | 129.622 | -95.381  | 1.00 | 86.49  | D | O |
| ATOM | 5917 | C   | GLU | D | 205 | 141.687 | 127.671 | -99.816  | 1.00 | 86.49  | D | C |
| ATOM | 5918 | O   | GLU | D | 205 | 142.353 | 127.161 | -100.717 | 1.00 | 86.49  | D | O |
| ATOM | 5919 | N   | THR | D | 206 | 140.464 | 127.259 | -99.498  | 1.00 | 119.91 | D | N |
| ATOM | 5920 | CA  | THR | D | 206 | 139.828 | 126.141 | -100.183 | 1.00 | 119.91 | D | C |
| ATOM | 5921 | CB  | THR | D | 206 | 138.785 | 125.451 | -99.281  | 1.00 | 119.91 | D | C |
| ATOM | 5922 | OG1 | THR | D | 206 | 139.374 | 125.152 | -98.009  | 1.00 | 119.91 | D | O |
| ATOM | 5923 | CG2 | THR | D | 206 | 138.290 | 124.163 | -99.923  | 1.00 | 119.91 | D | C |
| ATOM | 5924 | C   | THR | D | 206 | 139.157 | 126.594 | -101.477 | 1.00 | 119.91 | D | C |
| ATOM | 5925 | O   | THR | D | 206 | 138.878 | 125.782 | -102.359 | 1.00 | 119.91 | D | O |
| ATOM | 5926 | N   | VAL | D | 207 | 138.902 | 127.895 | -101.582 | 1.00 | 81.16  | D | N |
| ATOM | 5927 | CA  | VAL | D | 207 | 138.292 | 128.468 | -102.778 | 1.00 | 81.16  | D | C |
| ATOM | 5928 | CB  | VAL | D | 207 | 138.374 | 130.009 | -102.767 | 1.00 | 81.16  | D | C |
| ATOM | 5929 | CG1 | VAL | D | 207 | 137.934 | 130.579 | -104.108 | 1.00 | 81.16  | D | C |
| ATOM | 5930 | CG2 | VAL | D | 207 | 137.531 | 130.578 | -101.635 | 1.00 | 81.16  | D | C |
| ATOM | 5931 | C   | VAL | D | 207 | 138.959 | 127.933 | -104.041 | 1.00 | 81.16  | D | C |
| ATOM | 5932 | O   | VAL | D | 207 | 140.185 | 127.925 | -104.141 | 1.00 | 81.16  | D | O |
| ATOM | 5933 | N   | PRO | D | 208 | 138.146 | 127.477 | -105.007 | 1.00 | 163.31 | D | N |
| ATOM | 5934 | CA  | PRO | D | 208 | 138.618 | 126.897 | -106.269 | 1.00 | 163.31 | D | C |
| ATOM | 5935 | CD  | PRO | D | 208 | 136.674 | 127.492 | -104.927 | 1.00 | 163.31 | D | C |
| ATOM | 5936 | CB  | PRO | D | 208 | 137.361 | 126.910 | -107.139 | 1.00 | 163.31 | D | C |
| ATOM | 5937 | CG  | PRO | D | 208 | 136.252 | 126.747 | -106.167 | 1.00 | 163.31 | D | C |
| ATOM | 5938 | C   | PRO | D | 208 | 139.721 | 127.723 | -106.927 | 1.00 | 163.31 | D | C |
| ATOM | 5939 | O   | PRO | D | 208 | 139.433 | 128.676 | -107.650 | 1.00 | 163.31 | D | O |
| ATOM | 5940 | N   | CYS | D | 209 | 140.971 | 127.347 | -106.672 | 1.00 | 122.13 | D | N |
| ATOM | 5941 | CA  | CYS | D | 209 | 142.123 | 128.020 | -107.263 | 1.00 | 122.13 | D | C |
| ATOM | 5942 | CB  | CYS | D | 209 | 142.226 | 129.462 | -106.762 | 1.00 | 122.13 | D | C |
| ATOM | 5943 | SG  | CYS | D | 209 | 142.546 | 129.619 | -104.989 | 1.00 | 122.13 | D | S |
| ATOM | 5944 | C   | CYS | D | 209 | 143.407 | 127.263 | -106.942 | 1.00 | 122.13 | D | C |
| ATOM | 5945 | O   | CYS | D | 209 | 143.370 | 126.088 | -106.577 | 1.00 | 122.13 | D | O |
| ATOM | 5946 | N   | GLY | D | 210 | 144.542 | 127.942 | -107.079 | 1.00 | 296.88 | D | N |
| ATOM | 5947 | CA  | GLY | D | 210 | 145.830 | 127.342 | -106.785 | 1.00 | 296.88 | D | C |
| ATOM | 5948 | C   | GLY | D | 210 | 146.387 | 126.533 | -107.940 | 1.00 | 296.88 | D | C |
| ATOM | 5949 | O   | GLY | D | 210 | 145.838 | 126.544 | -109.041 | 1.00 | 296.88 | D | O |
| ATOM | 5950 | N   | SER | D | 211 | 147.484 | 125.827 | -107.685 | 1.00 | 230.38 | D | N |
| ATOM | 5951 | CA  | SER | D | 211 | 148.124 | 125.006 | -108.705 | 1.00 | 230.38 | D | C |
| ATOM | 5952 | CB  | SER | D | 211 | 149.573 | 125.450 | -108.916 | 1.00 | 230.38 | D | C |
| ATOM | 5953 | OG  | SER | D | 211 | 149.635 | 126.798 | -109.349 | 1.00 | 230.38 | D | O |

|      |      |     |     |   |     |         |                 |            |   |   |
|------|------|-----|-----|---|-----|---------|-----------------|------------|---|---|
| ATOM | 5954 | C   | SER | D | 211 | 148.078 | 123.527-108.334 | 1.00230.38 | D | C |
| ATOM | 5955 | O   | SER | D | 211 | 147.003 | 122.945-108.193 | 1.00230.38 | D | O |
| ATOM | 5956 | N   | SER | D | 212 | 149.253 | 122.926-108.175 | 1.00146.29 | D | N |
| ATOM | 5957 | CA  | SER | D | 212 | 149.352 | 121.514-107.818 | 1.00146.29 | D | C |
| ATOM | 5958 | CB  | SER | D | 212 | 149.990 | 120.707-108.954 | 1.00146.29 | D | C |
| ATOM | 5959 | OG  | SER | D | 212 | 149.210 | 120.780-110.135 | 1.00146.29 | D | O |
| ATOM | 5960 | C   | SER | D | 212 | 150.109 | 121.290-106.506 | 1.00146.29 | D | C |
| ATOM | 5961 | O   | SER | D | 212 | 149.601 | 120.621-105.606 | 1.00146.29 | D | O |
| ATOM | 5962 | N   | PRO | D | 213 | 151.327 | 121.849-106.390 | 1.00129.39 | D | N |
| ATOM | 5963 | CA  | PRO | D | 213 | 152.116 | 121.648-105.172 | 1.00129.39 | D | C |
| ATOM | 5964 | CD  | PRO | D | 213 | 152.050 | 122.677-107.366 | 1.00129.39 | D | C |
| ATOM | 5965 | CB  | PRO | D | 213 | 153.535 | 122.061-105.595 | 1.00129.39 | D | C |
| ATOM | 5966 | CG  | PRO | D | 213 | 153.468 | 122.329-107.082 | 1.00129.39 | D | C |
| ATOM | 5967 | C   | PRO | D | 213 | 151.641 | 122.558-104.047 | 1.00129.39 | D | C |
| ATOM | 5968 | O   | PRO | D | 213 | 151.972 | 122.326-102.885 | 1.00129.39 | D | O |
| ATOM | 5969 | N   | GLY | D | 214 | 150.883 | 123.589-104.402 | 1.00105.51 | D | N |
| ATOM | 5970 | CA  | GLY | D | 214 | 150.377 | 124.535-103.428 | 1.00105.51 | D | C |
| ATOM | 5971 | C   | GLY | D | 214 | 148.896 | 124.352-103.166 | 1.00105.51 | D | C |
| ATOM | 5972 | O   | GLY | D | 214 | 148.298 | 125.087-102.380 | 1.00105.51 | D | O |
| ATOM | 5973 | N   | HIS | D | 215 | 148.302 | 123.364-103.827 | 1.00142.23 | D | N |
| ATOM | 5974 | CA  | HIS | D | 215 | 146.882 | 123.080-103.669 | 1.00142.23 | D | C |
| ATOM | 5975 | ND1 | HIS | D | 215 | 143.890 | 123.084-104.620 | 1.00142.23 | D | N |
| ATOM | 5976 | CG  | HIS | D | 215 | 144.856 | 122.133-104.863 | 1.00142.23 | D | C |
| ATOM | 5977 | CB  | HIS | D | 215 | 146.313 | 122.465-104.949 | 1.00142.23 | D | C |
| ATOM | 5978 | NE2 | HIS | D | 215 | 142.863 | 121.214-104.818 | 1.00142.23 | D | N |
| ATOM | 5979 | CD2 | HIS | D | 215 | 144.202 | 120.954-104.987 | 1.00142.23 | D | C |
| ATOM | 5980 | CE1 | HIS | D | 215 | 142.702 | 122.506-104.598 | 1.00142.23 | D | C |
| ATOM | 5981 | C   | HIS | D | 215 | 146.630 | 122.151-102.486 | 1.00142.23 | D | C |
| ATOM | 5982 | O   | HIS | D | 215 | 145.618 | 122.273-101.794 | 1.00142.23 | D | O |
| ATOM | 5983 | N   | ILE | D | 216 | 147.555 | 121.225-102.258 | 1.00 67.89 | D | N |
| ATOM | 5984 | CA  | ILE | D | 216 | 147.435 | 120.276-101.158 | 1.00 67.89 | D | C |
| ATOM | 5985 | CB  | ILE | D | 216 | 148.474 | 119.145-101.269 | 1.00 67.89 | D | C |
| ATOM | 5986 | CG2 | ILE | D | 216 | 148.281 | 118.134-100.150 | 1.00 67.89 | D | C |
| ATOM | 5987 | CG1 | ILE | D | 216 | 148.379 | 118.465-102.636 | 1.00 67.89 | D | C |
| ATOM | 5988 | CD1 | ILE | D | 216 | 149.362 | 117.331-102.823 | 1.00 67.89 | D | C |
| ATOM | 5989 | C   | ILE | D | 216 | 147.603 | 120.977 -99.814 | 1.00 67.89 | D | C |
| ATOM | 5990 | O   | ILE | D | 216 | 146.781 | 120.816 -98.912 | 1.00 67.89 | D | O |
| ATOM | 5991 | N   | LYS | D | 217 | 148.674 | 121.754 -99.689 | 1.00172.29 | D | N |
| ATOM | 5992 | CA  | LYS | D | 217 | 148.939 | 122.498 -98.464 | 1.00172.29 | D | C |
| ATOM | 5993 | CB  | LYS | D | 217 | 150.425 | 122.851 -98.363 | 1.00172.29 | D | C |
| ATOM | 5994 | CG  | LYS | D | 217 | 150.841 | 123.441 -97.024 | 1.00172.29 | D | C |
| ATOM | 5995 | CD  | LYS | D | 217 | 150.567 | 122.471 -95.885 | 1.00172.29 | D | C |
| ATOM | 5996 | CE  | LYS | D | 217 | 150.975 | 123.063 -94.545 | 1.00172.29 | D | C |
| ATOM | 5997 | NZ  | LYS | D | 217 | 150.710 | 122.126 -93.417 | 1.00172.29 | D | N |
| ATOM | 5998 | C   | LYS | D | 217 | 148.088 | 123.763 -98.420 | 1.00172.29 | D | C |
| ATOM | 5999 | O   | LYS | D | 217 | 148.113 | 124.508 -97.440 | 1.00172.29 | D | O |
| ATOM | 6000 | N   | GLU | D | 218 | 147.338 | 123.997 -99.493 | 1.00302.48 | D | N |
| ATOM | 6001 | CA  | GLU | D | 218 | 146.448 | 125.151 -99.591 | 1.00302.48 | D | C |
| ATOM | 6002 | CB  | GLU | D | 218 | 145.468 | 125.179 -98.415 | 1.00302.48 | D | C |
| ATOM | 6003 | CG  | GLU | D | 218 | 144.612 | 123.928 -98.287 | 1.00302.48 | D | C |
| ATOM | 6004 | CD  | GLU | D | 218 | 143.677 | 123.733 -99.466 | 1.00302.48 | D | C |
| ATOM | 6005 | OE1 | GLU | D | 218 | 143.525 | 124.676-100.271 | 1.00302.48 | D | O |
| ATOM | 6006 | OE2 | GLU | D | 218 | 143.093 | 122.636 -99.587 | 1.00302.48 | D | O |
| ATOM | 6007 | C   | GLU | D | 218 | 147.216 | 126.468 -99.673 | 1.00302.48 | D | C |
| ATOM | 6008 | O   | GLU | D | 218 | 146.617 | 127.539 -99.766 | 1.00302.48 | D | O |
| ATOM | 6009 | N   | LEU | D | 219 | 148.541 | 126.381 -99.641 | 1.00167.09 | D | N |
| ATOM | 6010 | CA  | LEU | D | 219 | 149.389 | 127.564 -99.735 | 1.00167.09 | D | C |
| ATOM | 6011 | CB  | LEU | D | 219 | 149.283 | 128.413 -98.462 | 1.00167.09 | D | C |
| ATOM | 6012 | CG  | LEU | D | 219 | 149.279 | 127.708 -97.102 | 1.00167.09 | D | C |
| ATOM | 6013 | CD1 | LEU | D | 219 | 150.679 | 127.281 -96.691 | 1.00167.09 | D | C |
| ATOM | 6014 | CD2 | LEU | D | 219 | 148.676 | 128.617 -96.043 | 1.00167.09 | D | C |
| ATOM | 6015 | C   | LEU | D | 219 | 150.843 | 127.205-100.037 | 1.00167.09 | D | C |
| ATOM | 6016 | O   | LEU | D | 219 | 151.459 | 126.421 -99.317 | 1.00167.09 | D | O |
| ATOM | 6017 | N   | PRO | D | 220 | 151.388 | 127.772-101.123 | 1.00155.58 | D | N |
| ATOM | 6018 | CA  | PRO | D | 220 | 152.779 | 127.546-101.530 | 1.00155.58 | D | C |
| ATOM | 6019 | CD  | PRO | D | 220 | 150.655 | 128.594-102.100 | 1.00155.58 | D | C |
| ATOM | 6020 | CB  | PRO | D | 220 | 152.894 | 128.339-102.837 | 1.00155.58 | D | C |
| ATOM | 6021 | CG  | PRO | D | 220 | 151.492 | 128.467-103.333 | 1.00155.58 | D | C |

|      |      |     |     |   |     |         |                 |            |   |   |
|------|------|-----|-----|---|-----|---------|-----------------|------------|---|---|
| ATOM | 6022 | C   | PRO | D | 220 | 153.763 | 128.093-100.501 | 1.00155.58 | D | C |
| ATOM | 6023 | O   | PRO | D | 220 | 153.953 | 129.306-100.415 | 1.00155.58 | D | O |
| ATOM | 6024 | N   | CYS | D | 221 | 154.381 | 127.202 -99.732 | 1.00 60.66 | D | N |
| ATOM | 6025 | CA  | CYS | D | 221 | 155.340 | 127.610 -98.712 | 1.00 60.66 | D | C |
| ATOM | 6026 | CB  | CYS | D | 221 | 155.652 | 126.443 -97.773 | 1.00 60.66 | D | C |
| ATOM | 6027 | SG  | CYS | D | 221 | 154.213 | 125.786 -96.897 | 1.00 60.66 | D | S |
| ATOM | 6028 | C   | CYS | D | 221 | 156.625 | 128.136 -99.344 | 1.00 60.66 | D | C |
| ATOM | 6029 | O   | CYS | D | 221 | 157.257 | 127.451-100.148 | 1.00 60.66 | D | O |
| ATOM | 6030 | N   | GLY | D | 222 | 157.003 | 129.355 -98.976 | 1.00 31.84 | D | N |
| ATOM | 6031 | CA  | GLY | D | 222 | 158.203 | 129.974 -99.508 | 1.00 31.84 | D | C |
| ATOM | 6032 | C   | GLY | D | 222 | 158.620 | 131.207 -98.732 | 1.00 31.84 | D | C |
| ATOM | 6033 | O   | GLY | D | 222 | 157.844 | 131.752 -97.946 | 1.00 31.84 | D | O |
| ATOM | 6034 | N   | GLU | D | 223 | 159.853 | 131.648 -98.955 | 1.00109.66 | D | N |
| ATOM | 6035 | CA  | GLU | D | 223 | 160.382 | 132.829 -98.283 | 1.00109.66 | D | C |
| ATOM | 6036 | CB  | GLU | D | 223 | 161.910 | 132.751 -98.194 | 1.00109.66 | D | C |
| ATOM | 6037 | CG  | GLU | D | 223 | 162.564 | 133.893 -97.427 | 1.00109.66 | D | C |
| ATOM | 6038 | CD  | GLU | D | 223 | 162.767 | 135.134 -98.277 | 1.00109.66 | D | C |
| ATOM | 6039 | OE1 | GLU | D | 223 | 162.648 | 135.036 -99.516 | 1.00109.66 | D | O |
| ATOM | 6040 | OE2 | GLU | D | 223 | 163.046 | 136.208 -97.704 | 1.00109.66 | D | O |
| ATOM | 6041 | C   | GLU | D | 223 | 159.950 | 134.100 -99.007 | 1.00109.66 | D | C |
| ATOM | 6042 | O   | GLU | D | 223 | 159.892 | 135.177 -98.413 | 1.00109.66 | D | O |
| ATOM | 6043 | N   | ARG | D | 224 | 159.640 | 133.964-100.293 | 1.00102.89 | D | N |
| ATOM | 6044 | CA  | ARG | D | 224 | 159.225 | 135.098-101.112 | 1.00102.89 | D | C |
| ATOM | 6045 | CB  | ARG | D | 224 | 158.908 | 134.640-102.537 | 1.00102.89 | D | C |
| ATOM | 6046 | CG  | ARG | D | 224 | 160.081 | 134.002-103.262 | 1.00102.89 | D | C |
| ATOM | 6047 | CD  | ARG | D | 224 | 159.686 | 133.551-104.660 | 1.00102.89 | D | C |
| ATOM | 6048 | NE  | ARG | D | 224 | 160.794 | 132.905-105.358 | 1.00102.89 | D | N |
| ATOM | 6049 | CZ  | ARG | D | 224 | 160.716 | 132.414-106.590 | 1.00102.89 | D | C |
| ATOM | 6050 | NH1 | ARG | D | 224 | 159.578 | 132.496-107.267 | 1.00102.89 | D | N |
| ATOM | 6051 | NH2 | ARG | D | 224 | 161.774 | 131.842-107.148 | 1.00102.89 | D | N |
| ATOM | 6052 | C   | ARG | D | 224 | 158.018 | 135.818-100.517 | 1.00102.89 | D | C |
| ATOM | 6053 | O   | ARG | D | 224 | 157.843 | 137.020-100.718 | 1.00102.89 | D | O |
| ATOM | 6054 | N   | TYR | D | 225 | 157.189 | 135.077 -99.789 | 1.00235.34 | D | N |
| ATOM | 6055 | CA  | TYR | D | 225 | 155.993 | 135.639 -99.169 | 1.00235.34 | D | C |
| ATOM | 6056 | CB  | TYR | D | 225 | 156.373 | 136.642 -98.077 | 1.00235.34 | D | C |
| ATOM | 6057 | CG  | TYR | D | 225 | 157.179 | 136.046 -96.946 | 1.00235.34 | D | C |
| ATOM | 6058 | CD1 | TYR | D | 225 | 157.111 | 134.690 -96.657 | 1.00235.34 | D | C |
| ATOM | 6059 | CD2 | TYR | D | 225 | 158.010 | 136.840 -96.167 | 1.00235.34 | D | C |
| ATOM | 6060 | CE1 | TYR | D | 225 | 157.847 | 134.141 -95.624 | 1.00235.34 | D | C |
| ATOM | 6061 | CE2 | TYR | D | 225 | 158.750 | 136.301 -95.132 | 1.00235.34 | D | C |
| ATOM | 6062 | CZ  | TYR | D | 225 | 158.665 | 134.952 -94.865 | 1.00235.34 | D | C |
| ATOM | 6063 | OH  | TYR | D | 225 | 159.400 | 134.410 -93.836 | 1.00235.34 | D | O |
| ATOM | 6064 | C   | TYR | D | 225 | 155.089 | 136.306-100.200 | 1.00235.34 | D | C |
| ATOM | 6065 | O   | TYR | D | 225 | 154.528 | 137.372 -99.949 | 1.00235.34 | D | O |
| ATOM | 6066 | N   | ALA | D | 226 | 154.953 | 135.672-101.360 | 1.00 79.48 | D | N |
| ATOM | 6067 | CA  | ALA | D | 226 | 154.116 | 136.205-102.429 | 1.00 79.48 | D | C |
| ATOM | 6068 | CB  | ALA | D | 226 | 154.530 | 135.618-103.771 | 1.00 79.48 | D | C |
| ATOM | 6069 | C   | ALA | D | 226 | 152.639 | 135.935-102.161 | 1.00 79.48 | D | C |
| ATOM | 6070 | O   | ALA | D | 226 | 151.809 | 136.840-102.241 | 1.00 79.48 | D | O |
| ATOM | 6071 | N   | VAL | D | 227 | 152.319 | 134.685-101.843 | 1.00226.17 | D | N |
| ATOM | 6072 | CA  | VAL | D | 227 | 150.942 | 134.299-101.556 | 1.00226.17 | D | C |
| ATOM | 6073 | CB  | VAL | D | 227 | 150.800 | 132.770-101.432 | 1.00226.17 | D | C |
| ATOM | 6074 | CG1 | VAL | D | 227 | 149.367 | 132.397-101.084 | 1.00226.17 | D | C |
| ATOM | 6075 | CG2 | VAL | D | 227 | 151.235 | 132.092-102.721 | 1.00226.17 | D | C |
| ATOM | 6076 | C   | VAL | D | 227 | 150.445 | 134.958-100.273 | 1.00226.17 | D | C |
| ATOM | 6077 | O   | VAL | D | 227 | 151.049 | 134.804 -99.211 | 1.00226.17 | D | O |
| ATOM | 6078 | N   | ALA | D | 228 | 149.343 | 135.693-100.380 | 1.00 52.15 | D | N |
| ATOM | 6079 | CA  | ALA | D | 228 | 148.767 | 136.383 -99.231 | 1.00 52.15 | D | C |
| ATOM | 6080 | CB  | ALA | D | 228 | 147.648 | 137.311 -99.677 | 1.00 52.15 | D | C |
| ATOM | 6081 | C   | ALA | D | 228 | 148.255 | 135.394 -98.190 | 1.00 52.15 | D | C |
| ATOM | 6082 | O   | ALA | D | 228 | 148.265 | 135.678 -96.992 | 1.00 52.15 | D | O |
| ATOM | 6083 | N   | PHE | D | 229 | 147.808 | 134.232 -98.656 | 1.00 68.64 | D | N |
| ATOM | 6084 | CA  | PHE | D | 229 | 147.299 | 133.195 -97.767 | 1.00 68.64 | D | C |
| ATOM | 6085 | CB  | PHE | D | 229 | 146.728 | 132.029 -98.577 | 1.00 68.64 | D | C |
| ATOM | 6086 | CG  | PHE | D | 229 | 145.594 | 132.417 -99.481 | 1.00 68.64 | D | C |
| ATOM | 6087 | CD1 | PHE | D | 229 | 144.286 | 132.374 -99.030 | 1.00 68.64 | D | C |
| ATOM | 6088 | CD2 | PHE | D | 229 | 145.836 | 132.825-100.782 | 1.00 68.64 | D | C |
| ATOM | 6089 | CE1 | PHE | D | 229 | 143.240 | 132.730 -99.859 | 1.00 68.64 | D | C |

|      |      |     |     |   |     |         |         |          |      |        |   |   |
|------|------|-----|-----|---|-----|---------|---------|----------|------|--------|---|---|
| ATOM | 6090 | CE2 | PHE | D | 229 | 144.794 | 133.183 | -101.617 | 1.00 | 68.64  | D | C |
| ATOM | 6091 | CZ  | PHE | D | 229 | 143.494 | 133.135 | -101.154 | 1.00 | 68.64  | D | C |
| ATOM | 6092 | C   | PHE | D | 229 | 148.391 | 132.694 | -96.829  | 1.00 | 68.64  | D | C |
| ATOM | 6093 | O   | PHE | D | 229 | 148.131 | 132.388 | -95.665  | 1.00 | 68.64  | D | O |
| ATOM | 6094 | N   | PHE | D | 230 | 149.613 | 132.612 | -97.343  | 1.00 | 73.77  | D | N |
| ATOM | 6095 | CA  | PHE | D | 230 | 150.748 | 132.156 | -96.551  | 1.00 | 73.77  | D | C |
| ATOM | 6096 | CB  | PHE | D | 230 | 151.930 | 131.807 | -97.457  | 1.00 | 73.77  | D | C |
| ATOM | 6097 | CG  | PHE | D | 230 | 153.125 | 131.275 | -96.717  | 1.00 | 73.77  | D | C |
| ATOM | 6098 | CD1 | PHE | D | 230 | 153.225 | 129.927 | -96.415  | 1.00 | 73.77  | D | C |
| ATOM | 6099 | CD2 | PHE | D | 230 | 154.149 | 132.122 | -96.327  | 1.00 | 73.77  | D | C |
| ATOM | 6100 | CE1 | PHE | D | 230 | 154.323 | 129.435 | -95.736  | 1.00 | 73.77  | D | C |
| ATOM | 6101 | CE2 | PHE | D | 230 | 155.249 | 131.635 | -95.648  | 1.00 | 73.77  | D | C |
| ATOM | 6102 | CZ  | PHE | D | 230 | 155.336 | 130.290 | -95.352  | 1.00 | 73.77  | D | C |
| ATOM | 6103 | C   | PHE | D | 230 | 151.161 | 133.212 | -95.532  | 1.00 | 73.77  | D | C |
| ATOM | 6104 | O   | PHE | D | 230 | 151.597 | 132.887 | -94.428  | 1.00 | 73.77  | D | O |
| ATOM | 6105 | N   | CYS | D | 231 | 151.022 | 134.478 | -95.912  | 1.00 | 36.96  | D | N |
| ATOM | 6106 | CA  | CYS | D | 231 | 151.367 | 135.586 | -95.030  | 1.00 | 36.96  | D | C |
| ATOM | 6107 | CB  | CYS | D | 231 | 151.365 | 136.906 | -95.802  | 1.00 | 36.96  | D | C |
| ATOM | 6108 | SG  | CYS | D | 231 | 152.555 | 136.978 | -97.161  | 1.00 | 36.96  | D | S |
| ATOM | 6109 | C   | CYS | D | 231 | 150.404 | 135.665 | -93.852  | 1.00 | 36.96  | D | C |
| ATOM | 6110 | O   | CYS | D | 231 | 150.813 | 135.913 | -92.718  | 1.00 | 36.96  | D | O |
| ATOM | 6111 | N   | LEU | D | 232 | 149.121 | 135.452 | -94.128  | 1.00 | 104.38 | D | N |
| ATOM | 6112 | CA  | LEU | D | 232 | 148.099 | 135.481 | -93.088  | 1.00 | 104.38 | D | C |
| ATOM | 6113 | CB  | LEU | D | 232 | 146.701 | 135.511 | -93.709  | 1.00 | 104.38 | D | C |
| ATOM | 6114 | CG  | LEU | D | 232 | 146.373 | 136.718 | -94.591  | 1.00 | 104.38 | D | C |
| ATOM | 6115 | CD1 | LEU | D | 232 | 144.984 | 136.581 | -95.195  | 1.00 | 104.38 | D | C |
| ATOM | 6116 | CD2 | LEU | D | 232 | 146.493 | 138.010 | -93.798  | 1.00 | 104.38 | D | C |
| ATOM | 6117 | C   | LEU | D | 232 | 148.235 | 134.279 | -92.161  | 1.00 | 104.38 | D | C |
| ATOM | 6118 | O   | LEU | D | 232 | 148.080 | 134.399 | -90.946  | 1.00 | 104.38 | D | O |
| ATOM | 6119 | N   | ASP | D | 233 | 148.525 | 133.119 | -92.743  | 1.00 | 58.49  | D | N |
| ATOM | 6120 | CA  | ASP | D | 233 | 148.698 | 131.895 | -91.970  | 1.00 | 58.49  | D | C |
| ATOM | 6121 | CB  | ASP | D | 233 | 148.888 | 130.696 | -92.901  | 1.00 | 58.49  | D | C |
| ATOM | 6122 | CG  | ASP | D | 233 | 149.062 | 129.394 | -92.145  | 1.00 | 58.49  | D | C |
| ATOM | 6123 | OD1 | ASP | D | 233 | 148.494 | 129.265 | -91.040  | 1.00 | 58.49  | D | O |
| ATOM | 6124 | OD2 | ASP | D | 233 | 149.767 | 128.498 | -92.655  | 1.00 | 58.49  | D | O |
| ATOM | 6125 | C   | ASP | D | 233 | 149.883 | 132.014 | -91.018  | 1.00 | 58.49  | D | C |
| ATOM | 6126 | O   | ASP | D | 233 | 149.785 | 131.661 | -89.843  | 1.00 | 58.49  | D | O |
| ATOM | 6127 | N   | THR | D | 234 | 151.001 | 132.515 | -91.534  | 1.00 | 127.80 | D | N |
| ATOM | 6128 | CA  | THR | D | 234 | 152.203 | 132.697 | -90.729  | 1.00 | 127.80 | D | C |
| ATOM | 6129 | CB  | THR | D | 234 | 153.394 | 133.162 | -91.589  | 1.00 | 127.80 | D | C |
| ATOM | 6130 | OG1 | THR | D | 234 | 153.652 | 132.196 | -92.616  | 1.00 | 127.80 | D | O |
| ATOM | 6131 | CG2 | THR | D | 234 | 154.640 | 133.329 | -90.732  | 1.00 | 127.80 | D | C |
| ATOM | 6132 | C   | THR | D | 234 | 151.964 | 133.711 | -89.614  | 1.00 | 127.80 | D | C |
| ATOM | 6133 | O   | THR | D | 234 | 152.488 | 133.568 | -88.510  | 1.00 | 127.80 | D | O |
| ATOM | 6134 | N   | ALA | D | 235 | 151.167 | 134.732 | -89.912  | 1.00 | 35.61  | D | N |
| ATOM | 6135 | CA  | ALA | D | 235 | 150.848 | 135.765 | -88.934  | 1.00 | 35.61  | D | C |
| ATOM | 6136 | CB  | ALA | D | 235 | 150.091 | 136.906 | -89.597  | 1.00 | 35.61  | D | C |
| ATOM | 6137 | C   | ALA | D | 235 | 150.043 | 135.194 | -87.772  | 1.00 | 35.61  | D | C |
| ATOM | 6138 | O   | ALA | D | 235 | 150.285 | 135.529 | -86.612  | 1.00 | 35.61  | D | O |
| ATOM | 6139 | N   | CYS | D | 236 | 149.085 | 134.329 | -88.090  | 1.00 | 41.29  | D | N |
| ATOM | 6140 | CA  | CYS | D | 236 | 148.248 | 133.704 | -87.073  | 1.00 | 41.29  | D | C |
| ATOM | 6141 | CB  | CYS | D | 236 | 147.064 | 132.982 | -87.720  | 1.00 | 41.29  | D | C |
| ATOM | 6142 | SG  | CYS | D | 236 | 145.948 | 134.059 | -88.648  | 1.00 | 41.29  | D | S |
| ATOM | 6143 | C   | CYS | D | 236 | 149.054 | 132.729 | -86.220  | 1.00 | 41.29  | D | C |
| ATOM | 6144 | O   | CYS | D | 236 | 148.970 | 132.749 | -84.992  | 1.00 | 41.29  | D | O |
| ATOM | 6145 | N   | VAL | D | 237 | 149.835 | 131.879 | -86.879  | 1.00 | 109.38 | D | N |
| ATOM | 6146 | CA  | VAL | D | 237 | 150.667 | 130.905 | -86.183  | 1.00 | 109.38 | D | C |
| ATOM | 6147 | CB  | VAL | D | 237 | 151.385 | 129.965 | -87.171  | 1.00 | 109.38 | D | C |
| ATOM | 6148 | CG1 | VAL | D | 237 | 152.317 | 129.021 | -86.427  | 1.00 | 109.38 | D | C |
| ATOM | 6149 | CG2 | VAL | D | 237 | 150.371 | 129.185 | -87.992  | 1.00 | 109.38 | D | C |
| ATOM | 6150 | C   | VAL | D | 237 | 151.701 | 131.600 | -85.304  | 1.00 | 109.38 | D | C |
| ATOM | 6151 | O   | VAL | D | 237 | 152.028 | 131.123 | -84.218  | 1.00 | 109.38 | D | O |
| ATOM | 6152 | N   | MET | D | 238 | 152.210 | 132.732 | -85.781  | 1.00 | 141.41 | D | N |
| ATOM | 6153 | CA  | MET | D | 238 | 153.193 | 133.507 | -85.034  | 1.00 | 141.41 | D | C |
| ATOM | 6154 | CB  | MET | D | 238 | 153.609 | 134.749 | -85.827  | 1.00 | 141.41 | D | C |
| ATOM | 6155 | CG  | MET | D | 238 | 154.749 | 135.550 | -85.209  | 1.00 | 141.41 | D | C |
| ATOM | 6156 | SD  | MET | D | 238 | 154.254 | 136.542 | -83.786  | 1.00 | 141.41 | D | S |
| ATOM | 6157 | CE  | MET | D | 238 | 155.807 | 137.329 | -83.367  | 1.00 | 141.41 | D | C |

|      |      |     |     |   |     |         |         |         |            |   |   |
|------|------|-----|-----|---|-----|---------|---------|---------|------------|---|---|
| ATOM | 6158 | C   | MET | D | 238 | 152.635 | 133.908 | -83.673 | 1.00141.41 | D | C |
| ATOM | 6159 | O   | MET | D | 238 | 153.273 | 133.695 | -82.642 | 1.00141.41 | D | O |
| ATOM | 6160 | N   | ILE | D | 239 | 151.440 | 134.488 | -83.678 | 1.00163.25 | D | N |
| ATOM | 6161 | CA  | ILE | D | 239 | 150.786 | 134.909 | -82.445 | 1.00163.25 | D | C |
| ATOM | 6162 | CB  | ILE | D | 239 | 149.462 | 135.643 | -82.732 | 1.00163.25 | D | C |
| ATOM | 6163 | CG2 | ILE | D | 239 | 148.802 | 136.080 | -81.433 | 1.00163.25 | D | C |
| ATOM | 6164 | CG1 | ILE | D | 239 | 149.706 | 136.847 | -83.644 | 1.00163.25 | D | C |
| ATOM | 6165 | CD1 | ILE | D | 239 | 150.657 | 137.870 | -83.063 | 1.00163.25 | D | C |
| ATOM | 6166 | C   | ILE | D | 239 | 150.508 | 133.715 | -81.539 | 1.00163.25 | D | C |
| ATOM | 6167 | O   | ILE | D | 239 | 150.711 | 133.783 | -80.327 | 1.00163.25 | D | O |
| ATOM | 6168 | N   | PHE | D | 240 | 150.046 | 132.621 | -82.136 | 1.0070.90  | D | N |
| ATOM | 6169 | CA  | PHE | D | 240 | 149.736 | 131.410 | -81.386 | 1.0070.90  | D | C |
| ATOM | 6170 | CB  | PHE | D | 240 | 149.072 | 130.372 | -82.293 | 1.0070.90  | D | C |
| ATOM | 6171 | CG  | PHE | D | 240 | 147.773 | 130.832 | -82.893 | 1.0070.90  | D | C |
| ATOM | 6172 | CD1 | PHE | D | 240 | 147.037 | 131.841 | -82.295 | 1.0070.90  | D | C |
| ATOM | 6173 | CD2 | PHE | D | 240 | 147.289 | 130.256 | -84.055 | 1.0070.90  | D | C |
| ATOM | 6174 | CE1 | PHE | D | 240 | 145.842 | 132.267 | -82.844 | 1.0070.90  | D | C |
| ATOM | 6175 | CE2 | PHE | D | 240 | 146.094 | 130.677 | -84.610 | 1.0070.90  | D | C |
| ATOM | 6176 | CZ  | PHE | D | 240 | 145.370 | 131.684 | -84.003 | 1.0070.90  | D | C |
| ATOM | 6177 | C   | PHE | D | 240 | 150.989 | 130.822 | -80.744 | 1.0070.90  | D | C |
| ATOM | 6178 | O   | PHE | D | 240 | 150.937 | 130.281 | -79.640 | 1.0070.90  | D | O |
| ATOM | 6179 | N   | THR | D | 241 | 152.114 | 130.933 | -81.443 | 1.00101.68 | D | N |
| ATOM | 6180 | CA  | THR | D | 241 | 153.382 | 130.414 | -80.943 | 1.00101.68 | D | C |
| ATOM | 6181 | CB  | THR | D | 241 | 154.459 | 130.396 | -82.044 | 1.00101.68 | D | C |
| ATOM | 6182 | OG1 | THR | D | 241 | 154.038 | 129.541 | -83.114 | 1.00101.68 | D | O |
| ATOM | 6183 | CG2 | THR | D | 241 | 155.781 | 129.890 | -81.488 | 1.00101.68 | D | C |
| ATOM | 6184 | C   | THR | D | 241 | 153.886 | 131.237 | -79.762 | 1.00101.68 | D | C |
| ATOM | 6185 | O   | THR | D | 241 | 154.336 | 130.685 | -78.758 | 1.00101.68 | D | O |
| ATOM | 6186 | N   | VAL | D | 242 | 153.807 | 132.558 | -79.890 | 1.0032.84  | D | N |
| ATOM | 6187 | CA  | VAL | D | 242 | 154.244 | 133.457 | -78.829 | 1.0032.84  | D | C |
| ATOM | 6188 | CB  | VAL | D | 242 | 154.062 | 134.934 | -79.227 | 1.0032.84  | D | C |
| ATOM | 6189 | CG1 | VAL | D | 242 | 154.414 | 135.846 | -78.061 | 1.0032.84  | D | C |
| ATOM | 6190 | CG2 | VAL | D | 242 | 154.913 | 135.264 | -80.443 | 1.0032.84  | D | C |
| ATOM | 6191 | C   | VAL | D | 242 | 153.484 | 133.186 | -77.535 | 1.0032.84  | D | C |
| ATOM | 6192 | O   | VAL | D | 242 | 154.069 | 133.165 | -76.452 | 1.0032.84  | D | O |
| ATOM | 6193 | N   | GLU | D | 243 | 152.177 | 132.974 | -77.654 | 1.0057.64  | D | N |
| ATOM | 6194 | CA  | GLU | D | 243 | 151.342 | 132.677 | -76.497 | 1.0057.64  | D | C |
| ATOM | 6195 | CB  | GLU | D | 243 | 149.876 | 132.548 | -76.913 | 1.0057.64  | D | C |
| ATOM | 6196 | CG  | GLU | D | 243 | 149.292 | 133.807 | -77.531 | 1.0057.64  | D | C |
| ATOM | 6197 | CD  | GLU | D | 243 | 147.845 | 133.635 | -77.948 | 1.0057.64  | D | C |
| ATOM | 6198 | OE1 | GLU | D | 243 | 147.294 | 134.558 | -78.585 | 1.0057.64  | D | O |
| ATOM | 6199 | OE2 | GLU | D | 243 | 147.258 | 132.576 | -77.640 | 1.0057.64  | D | O |
| ATOM | 6200 | C   | GLU | D | 243 | 151.804 | 131.398 | -75.808 | 1.0057.64  | D | C |
| ATOM | 6201 | O   | GLU | D | 243 | 151.793 | 131.302 | -74.581 | 1.0057.64  | D | O |
| ATOM | 6202 | N   | TYR | D | 244 | 152.210 | 130.418 | -76.608 | 1.0053.95  | D | N |
| ATOM | 6203 | CA  | TYR | D | 244 | 152.691 | 129.147 | -76.081 | 1.0053.95  | D | C |
| ATOM | 6204 | CB  | TYR | D | 244 | 152.838 | 128.121 | -77.207 | 1.0053.95  | D | C |
| ATOM | 6205 | CG  | TYR | D | 244 | 153.495 | 126.829 | -76.777 | 1.0053.95  | D | C |
| ATOM | 6206 | CD1 | TYR | D | 244 | 152.759 | 125.822 | -76.167 | 1.0053.95  | D | C |
| ATOM | 6207 | CD2 | TYR | D | 244 | 154.851 | 126.614 | -76.984 | 1.0053.95  | D | C |
| ATOM | 6208 | CE1 | TYR | D | 244 | 153.356 | 124.639 | -75.773 | 1.0053.95  | D | C |
| ATOM | 6209 | CE2 | TYR | D | 244 | 155.456 | 125.435 | -76.594 | 1.0053.95  | D | C |
| ATOM | 6210 | CZ  | TYR | D | 244 | 154.704 | 124.451 | -75.989 | 1.0053.95  | D | C |
| ATOM | 6211 | OH  | TYR | D | 244 | 155.302 | 123.275 | -75.599 | 1.0053.95  | D | O |
| ATOM | 6212 | C   | TYR | D | 244 | 154.018 | 129.315 | -75.349 | 1.0053.95  | D | C |
| ATOM | 6213 | O   | TYR | D | 244 | 154.244 | 128.704 | -74.305 | 1.0053.95  | D | O |
| ATOM | 6214 | N   | LEU | D | 245 | 154.893 | 130.149 | -75.903 | 1.0044.50  | D | N |
| ATOM | 6215 | CA  | LEU | D | 245 | 156.209 | 130.380 | -75.318 | 1.0044.50  | D | C |
| ATOM | 6216 | CB  | LEU | D | 245 | 157.122 | 131.092 | -76.318 | 1.0044.50  | D | C |
| ATOM | 6217 | CG  | LEU | D | 245 | 157.397 | 130.351 | -77.628 | 1.0044.50  | D | C |
| ATOM | 6218 | CD1 | LEU | D | 245 | 158.246 | 131.204 | -78.559 | 1.0044.50  | D | C |
| ATOM | 6219 | CD2 | LEU | D | 245 | 158.068 | 129.013 | -77.359 | 1.0044.50  | D | C |
| ATOM | 6220 | C   | LEU | D | 245 | 156.119 | 131.185 | -74.025 | 1.0044.50  | D | C |
| ATOM | 6221 | O   | LEU | D | 245 | 156.842 | 130.919 | -73.065 | 1.0044.50  | D | O |
| ATOM | 6222 | N   | LEU | D | 246 | 155.227 | 132.170 | -74.007 | 1.0093.07  | D | N |
| ATOM | 6223 | CA  | LEU | D | 246 | 155.056 | 133.027 | -72.839 | 1.0093.07  | D | C |
| ATOM | 6224 | CB  | LEU | D | 246 | 154.201 | 134.248 | -73.185 | 1.0093.07  | D | C |
| ATOM | 6225 | CG  | LEU | D | 246 | 154.796 | 135.223 | -74.203 | 1.0093.07  | D | C |

|      |      |     |     |   |     |         |         |         |      |        |   |   |
|------|------|-----|-----|---|-----|---------|---------|---------|------|--------|---|---|
| ATOM | 6226 | CD1 | LEU | D | 246 | 153.822 | 136.353 | -74.499 | 1.00 | 93.07  | D | C |
| ATOM | 6227 | CD2 | LEU | D | 246 | 156.125 | 135.773 | -73.706 | 1.00 | 93.07  | D | C |
| ATOM | 6228 | C   | LEU | D | 246 | 154.442 | 132.269 | -71.667 | 1.00 | 93.07  | D | C |
| ATOM | 6229 | O   | LEU | D | 246 | 154.963 | 132.309 | -70.552 | 1.00 | 93.07  | D | O |
| ATOM | 6230 | N   | ARG | D | 247 | 153.335 | 131.579 | -71.922 | 1.00 | 110.03 | D | N |
| ATOM | 6231 | CA  | ARG | D | 247 | 152.652 | 130.820 | -70.879 | 1.00 | 110.03 | D | C |
| ATOM | 6232 | CB  | ARG | D | 247 | 151.311 | 130.284 | -71.386 | 1.00 | 110.03 | D | C |
| ATOM | 6233 | CG  | ARG | D | 247 | 150.287 | 131.362 | -71.708 | 1.00 | 110.03 | D | C |
| ATOM | 6234 | CD  | ARG | D | 247 | 148.913 | 130.755 | -71.950 | 1.00 | 110.03 | D | C |
| ATOM | 6235 | NE  | ARG | D | 247 | 147.906 | 131.770 | -72.250 | 1.00 | 110.03 | D | N |
| ATOM | 6236 | CZ  | ARG | D | 247 | 147.514 | 132.093 | -73.478 | 1.00 | 110.03 | D | C |
| ATOM | 6237 | NH1 | ARG | D | 247 | 148.042 | 131.478 | -74.528 | 1.00 | 110.03 | D | N |
| ATOM | 6238 | NH2 | ARG | D | 247 | 146.592 | 133.029 | -73.657 | 1.00 | 110.03 | D | N |
| ATOM | 6239 | C   | ARG | D | 247 | 153.515 | 129.672 | -70.362 | 1.00 | 110.03 | D | C |
| ATOM | 6240 | O   | ARG | D | 247 | 153.346 | 129.220 | -69.230 | 1.00 | 110.03 | D | O |
| ATOM | 6241 | N   | LEU | D | 248 | 154.437 | 129.205 | -71.197 | 1.00 | 148.40 | D | N |
| ATOM | 6242 | CA  | LEU | D | 248 | 155.326 | 128.112 | -70.820 | 1.00 | 148.40 | D | C |
| ATOM | 6243 | CB  | LEU | D | 248 | 156.013 | 127.530 | -72.057 | 1.00 | 148.40 | D | C |
| ATOM | 6244 | CG  | LEU | D | 248 | 156.927 | 126.325 | -71.827 | 1.00 | 148.40 | D | C |
| ATOM | 6245 | CD1 | LEU | D | 248 | 156.158 | 125.185 | -71.178 | 1.00 | 148.40 | D | C |
| ATOM | 6246 | CD2 | LEU | D | 248 | 157.561 | 125.872 | -73.133 | 1.00 | 148.40 | D | C |
| ATOM | 6247 | C   | LEU | D | 248 | 156.371 | 128.578 | -69.811 | 1.00 | 148.40 | D | C |
| ATOM | 6248 | O   | LEU | D | 248 | 156.859 | 127.790 | -69.001 | 1.00 | 148.40 | D | O |
| ATOM | 6249 | N   | ALA | D | 249 | 156.707 | 129.862 | -69.865 | 1.00 | 46.03  | D | N |
| ATOM | 6250 | CA  | ALA | D | 249 | 157.699 | 130.433 | -68.961 | 1.00 | 46.03  | D | C |
| ATOM | 6251 | CB  | ALA | D | 249 | 158.664 | 131.325 | -69.728 | 1.00 | 46.03  | D | C |
| ATOM | 6252 | C   | ALA | D | 249 | 157.035 | 131.212 | -67.830 | 1.00 | 46.03  | D | C |
| ATOM | 6253 | O   | ALA | D | 249 | 157.686 | 131.582 | -66.853 | 1.00 | 46.03  | D | O |
| ATOM | 6254 | N   | ALA | D | 250 | 155.736 | 131.458 | -67.969 | 1.00 | 55.13  | D | N |
| ATOM | 6255 | CA  | ALA | D | 250 | 154.982 | 132.188 | -66.957 | 1.00 | 55.13  | D | C |
| ATOM | 6256 | CB  | ALA | D | 250 | 153.983 | 133.128 | -67.615 | 1.00 | 55.13  | D | C |
| ATOM | 6257 | C   | ALA | D | 250 | 154.270 | 131.231 | -66.008 | 1.00 | 55.13  | D | C |
| ATOM | 6258 | O   | ALA | D | 250 | 153.831 | 131.625 | -64.928 | 1.00 | 55.13  | D | O |
| ATOM | 6259 | N   | ALA | D | 251 | 154.158 | 129.972 | -66.418 | 1.00 | 67.05  | D | N |
| ATOM | 6260 | CA  | ALA | D | 251 | 153.504 | 128.956 | -65.602 | 1.00 | 67.05  | D | C |
| ATOM | 6261 | CB  | ALA | D | 251 | 153.191 | 127.724 | -66.438 | 1.00 | 67.05  | D | C |
| ATOM | 6262 | C   | ALA | D | 251 | 154.362 | 128.581 | -64.399 | 1.00 | 67.05  | D | C |
| ATOM | 6263 | O   | ALA | D | 251 | 155.507 | 128.157 | -64.556 | 1.00 | 67.05  | D | O |
| ATOM | 6264 | N   | PRO | D | 252 | 153.805 | 128.739 | -63.189 | 1.00 | 163.88 | D | N |
| ATOM | 6265 | CA  | PRO | D | 252 | 154.498 | 128.410 | -61.939 | 1.00 | 163.88 | D | C |
| ATOM | 6266 | CD  | PRO | D | 252 | 152.458 | 129.285 | -62.947 | 1.00 | 163.88 | D | C |
| ATOM | 6267 | CB  | PRO | D | 252 | 153.409 | 128.601 | -60.880 | 1.00 | 163.88 | D | C |
| ATOM | 6268 | CG  | PRO | D | 252 | 152.476 | 129.593 | -61.480 | 1.00 | 163.88 | D | C |
| ATOM | 6269 | C   | PRO | D | 252 | 154.992 | 126.967 | -61.926 | 1.00 | 163.88 | D | C |
| ATOM | 6270 | O   | PRO | D | 252 | 155.976 | 126.659 | -61.254 | 1.00 | 163.88 | D | O |
| ATOM | 6271 | N   | SER | D | 253 | 154.312 | 126.097 | -62.665 | 1.00 | 124.25 | D | N |
| ATOM | 6272 | CA  | SER | D | 253 | 154.689 | 124.691 | -62.735 | 1.00 | 124.25 | D | C |
| ATOM | 6273 | CB  | SER | D | 253 | 153.575 | 123.809 | -62.165 | 1.00 | 124.25 | D | C |
| ATOM | 6274 | OG  | SER | D | 253 | 153.928 | 122.438 | -62.227 | 1.00 | 124.25 | D | O |
| ATOM | 6275 | C   | SER | D | 253 | 155.005 | 124.274 | -64.168 | 1.00 | 124.25 | D | C |
| ATOM | 6276 | O   | SER | D | 253 | 154.305 | 124.657 | -65.105 | 1.00 | 124.25 | D | O |
| ATOM | 6277 | N   | ARG | D | 254 | 156.064 | 123.488 | -64.330 | 1.00 | 172.72 | D | N |
| ATOM | 6278 | CA  | ARG | D | 254 | 156.472 | 123.014 | -65.647 | 1.00 | 172.72 | D | C |
| ATOM | 6279 | CB  | ARG | D | 254 | 157.976 | 123.209 | -65.845 | 1.00 | 172.72 | D | C |
| ATOM | 6280 | CG  | ARG | D | 254 | 158.422 | 124.661 | -65.825 | 1.00 | 172.72 | D | C |
| ATOM | 6281 | CD  | ARG | D | 254 | 157.771 | 125.450 | -66.949 | 1.00 | 172.72 | D | C |
| ATOM | 6282 | NE  | ARG | D | 254 | 158.103 | 124.906 | -68.262 | 1.00 | 172.72 | D | N |
| ATOM | 6283 | CZ  | ARG | D | 254 | 159.155 | 125.282 | -68.982 | 1.00 | 172.72 | D | C |
| ATOM | 6284 | NH1 | ARG | D | 254 | 159.983 | 126.208 | -68.518 | 1.00 | 172.72 | D | N |
| ATOM | 6285 | NH2 | ARG | D | 254 | 159.380 | 124.732 | -70.168 | 1.00 | 172.72 | D | N |
| ATOM | 6286 | C   | ARG | D | 254 | 156.103 | 121.547 | -65.847 | 1.00 | 172.72 | D | C |
| ATOM | 6287 | O   | ARG | D | 254 | 156.317 | 120.985 | -66.921 | 1.00 | 172.72 | D | O |
| ATOM | 6288 | N   | TYR | D | 255 | 155.551 | 120.933 | -64.806 | 1.00 | 99.39  | D | N |
| ATOM | 6289 | CA  | TYR | D | 255 | 155.149 | 119.533 | -64.870 | 1.00 | 99.39  | D | C |
| ATOM | 6290 | CB  | TYR | D | 255 | 155.590 | 118.788 | -63.607 | 1.00 | 99.39  | D | C |
| ATOM | 6291 | CG  | TYR | D | 255 | 155.352 | 117.296 | -63.660 | 1.00 | 99.39  | D | C |
| ATOM | 6292 | CD1 | TYR | D | 255 | 156.293 | 116.443 | -64.221 | 1.00 | 99.39  | D | C |
| ATOM | 6293 | CD2 | TYR | D | 255 | 154.188 | 116.739 | -63.146 | 1.00 | 99.39  | D | C |



|      |      |     |     |   |     |         |         |         |      |        |   |   |
|------|------|-----|-----|---|-----|---------|---------|---------|------|--------|---|---|
| ATOM | 6294 | CE1 | TYR | D | 255 | 156.080 | 115.078 | -64.271 | 1.00 | 99.39  | D | C |
| ATOM | 6295 | CE2 | TYR | D | 255 | 153.967 | 115.376 | -63.191 | 1.00 | 99.39  | D | C |
| ATOM | 6296 | CZ  | TYR | D | 255 | 154.917 | 114.551 | -63.755 | 1.00 | 99.39  | D | C |
| ATOM | 6297 | OH  | TYR | D | 255 | 154.701 | 113.193 | -63.802 | 1.00 | 99.39  | D | O |
| ATOM | 6298 | C   | TYR | D | 255 | 153.641 | 119.408 | -65.058 | 1.00 | 99.39  | D | C |
| ATOM | 6299 | O   | TYR | D | 255 | 153.152 | 118.411 | -65.590 | 1.00 | 99.39  | D | O |
| ATOM | 6300 | N   | ARG | D | 256 | 152.909 | 120.427 | -64.621 | 1.00 | 167.77 | D | N |
| ATOM | 6301 | CA  | ARG | D | 256 | 151.457 | 120.441 | -64.754 | 1.00 | 167.77 | D | C |
| ATOM | 6302 | CB  | ARG | D | 256 | 150.815 | 121.113 | -63.539 | 1.00 | 167.77 | D | C |
| ATOM | 6303 | CG  | ARG | D | 256 | 151.070 | 120.395 | -62.224 | 1.00 | 167.77 | D | C |
| ATOM | 6304 | CD  | ARG | D | 256 | 150.433 | 121.138 | -61.060 | 1.00 | 167.77 | D | C |
| ATOM | 6305 | NE  | ARG | D | 256 | 148.999 | 121.331 | -61.255 | 1.00 | 167.77 | D | N |
| ATOM | 6306 | CZ  | ARG | D | 256 | 148.067 | 120.474 | -60.850 | 1.00 | 167.77 | D | C |
| ATOM | 6307 | NH1 | ARG | D | 256 | 148.417 | 119.359 | -60.224 | 1.00 | 167.77 | D | N |
| ATOM | 6308 | NH2 | ARG | D | 256 | 146.785 | 120.732 | -61.070 | 1.00 | 167.77 | D | N |
| ATOM | 6309 | C   | ARG | D | 256 | 151.028 | 121.156 | -66.032 | 1.00 | 167.77 | D | C |
| ATOM | 6310 | O   | ARG | D | 256 | 149.838 | 121.348 | -66.278 | 1.00 | 167.77 | D | O |
| ATOM | 6311 | N   | PHE | D | 257 | 152.008 | 121.548 | -66.841 | 1.00 | 86.55  | D | N |
| ATOM | 6312 | CA  | PHE | D | 257 | 151.736 | 122.250 | -68.089 | 1.00 | 86.55  | D | C |
| ATOM | 6313 | CB  | PHE | D | 257 | 153.003 | 122.940 | -68.601 | 1.00 | 86.55  | D | C |
| ATOM | 6314 | CG  | PHE | D | 257 | 152.814 | 123.662 | -69.905 | 1.00 | 86.55  | D | C |
| ATOM | 6315 | CD1 | PHE | D | 257 | 152.338 | 124.962 | -69.930 | 1.00 | 86.55  | D | C |
| ATOM | 6316 | CD2 | PHE | D | 257 | 153.116 | 123.042 | -71.106 | 1.00 | 86.55  | D | C |
| ATOM | 6317 | CE1 | PHE | D | 257 | 152.165 | 125.630 | -71.128 | 1.00 | 86.55  | D | C |
| ATOM | 6318 | CE2 | PHE | D | 257 | 152.945 | 123.703 | -72.307 | 1.00 | 86.55  | D | C |
| ATOM | 6319 | CZ  | PHE | D | 257 | 152.469 | 124.999 | -72.318 | 1.00 | 86.55  | D | C |
| ATOM | 6320 | C   | PHE | D | 257 | 151.188 | 121.305 | -69.152 | 1.00 | 86.55  | D | C |
| ATOM | 6321 | O   | PHE | D | 257 | 150.185 | 121.600 | -69.800 | 1.00 | 86.55  | D | O |
| ATOM | 6322 | N   | VAL | D | 258 | 151.853 | 120.167 | -69.325 | 1.00 | 126.69 | D | N |
| ATOM | 6323 | CA  | VAL | D | 258 | 151.447 | 119.187 | -70.325 | 1.00 | 126.69 | D | C |
| ATOM | 6324 | CB  | VAL | D | 258 | 152.587 | 118.205 | -70.646 | 1.00 | 126.69 | D | C |
| ATOM | 6325 | CG1 | VAL | D | 258 | 153.770 | 118.945 | -71.253 | 1.00 | 126.69 | D | C |
| ATOM | 6326 | CG2 | VAL | D | 258 | 153.006 | 117.450 | -69.394 | 1.00 | 126.69 | D | C |
| ATOM | 6327 | C   | VAL | D | 258 | 150.222 | 118.397 | -69.874 | 1.00 | 126.69 | D | C |
| ATOM | 6328 | O   | VAL | D | 258 | 149.716 | 117.548 | -70.608 | 1.00 | 126.69 | D | O |
| ATOM | 6329 | N   | ARG | D | 259 | 149.750 | 118.682 | -68.665 | 1.00 | 166.93 | D | N |
| ATOM | 6330 | CA  | ARG | D | 259 | 148.585 | 117.994 | -68.119 | 1.00 | 166.93 | D | C |
| ATOM | 6331 | CB  | ARG | D | 259 | 148.708 | 117.852 | -66.600 | 1.00 | 166.93 | D | C |
| ATOM | 6332 | CG  | ARG | D | 259 | 147.565 | 117.087 | -65.955 | 1.00 | 166.93 | D | C |
| ATOM | 6333 | CD  | ARG | D | 259 | 147.740 | 116.997 | -64.448 | 1.00 | 166.93 | D | C |
| ATOM | 6334 | NE  | ARG | D | 259 | 146.678 | 116.216 | -63.820 | 1.00 | 166.93 | D | N |
| ATOM | 6335 | CZ  | ARG | D | 259 | 145.530 | 116.728 | -63.387 | 1.00 | 166.93 | D | C |
| ATOM | 6336 | NH1 | ARG | D | 259 | 145.292 | 118.026 | -63.512 | 1.00 | 166.93 | D | N |
| ATOM | 6337 | NH2 | ARG | D | 259 | 144.621 | 115.942 | -62.828 | 1.00 | 166.93 | D | N |
| ATOM | 6338 | C   | ARG | D | 259 | 147.293 | 118.724 | -68.473 | 1.00 | 166.93 | D | C |
| ATOM | 6339 | O   | ARG | D | 259 | 146.253 | 118.099 | -68.678 | 1.00 | 166.93 | D | O |
| ATOM | 6340 | N   | SER | D | 260 | 147.367 | 120.049 | -68.544 | 1.00 | 90.97  | D | N |
| ATOM | 6341 | CA  | SER | D | 260 | 146.201 | 120.865 | -68.866 | 1.00 | 90.97  | D | C |
| ATOM | 6342 | CB  | SER | D | 260 | 146.533 | 122.352 | -68.727 | 1.00 | 90.97  | D | C |
| ATOM | 6343 | OG  | SER | D | 260 | 146.936 | 122.664 | -67.405 | 1.00 | 90.97  | D | O |
| ATOM | 6344 | C   | SER | D | 260 | 145.691 | 120.570 | -70.272 | 1.00 | 90.97  | D | C |
| ATOM | 6345 | O   | SER | D | 260 | 146.469 | 120.252 | -71.171 | 1.00 | 90.97  | D | O |
| ATOM | 6346 | N   | VAL | D | 261 | 144.378 | 120.676 | -70.455 | 1.00 | 94.76  | D | N |
| ATOM | 6347 | CA  | VAL | D | 261 | 143.761 | 120.412 | -71.750 | 1.00 | 94.76  | D | C |
| ATOM | 6348 | CB  | VAL | D | 261 | 142.303 | 119.938 | -71.596 | 1.00 | 94.76  | D | C |
| ATOM | 6349 | CG1 | VAL | D | 261 | 142.252 | 118.598 | -70.879 | 1.00 | 94.76  | D | C |
| ATOM | 6350 | CG2 | VAL | D | 261 | 141.480 | 120.981 | -70.853 | 1.00 | 94.76  | D | C |
| ATOM | 6351 | C   | VAL | D | 261 | 143.797 | 121.645 | -72.648 | 1.00 | 94.76  | D | C |
| ATOM | 6352 | O   | VAL | D | 261 | 143.751 | 121.533 | -73.872 | 1.00 | 94.76  | D | O |
| ATOM | 6353 | N   | MET | D | 262 | 143.878 | 122.819 | -72.031 | 1.00 | 60.02  | D | N |
| ATOM | 6354 | CA  | MET | D | 262 | 143.923 | 124.072 | -72.776 | 1.00 | 60.02  | D | C |
| ATOM | 6355 | CB  | MET | D | 262 | 143.632 | 125.257 | -71.853 | 1.00 | 60.02  | D | C |
| ATOM | 6356 | CG  | MET | D | 262 | 142.248 | 125.229 | -71.225 | 1.00 | 60.02  | D | C |
| ATOM | 6357 | SD  | MET | D | 262 | 140.930 | 125.229 | -72.456 | 1.00 | 60.02  | D | S |
| ATOM | 6358 | CE  | MET | D | 262 | 139.482 | 125.212 | -71.403 | 1.00 | 60.02  | D | C |
| ATOM | 6359 | C   | MET | D | 262 | 145.275 | 124.257 | -73.458 | 1.00 | 60.02  | D | C |
| ATOM | 6360 | O   | MET | D | 262 | 145.358 | 124.816 | -74.552 | 1.00 | 60.02  | D | O |
| ATOM | 6361 | N   | SER | D | 263 | 146.330 | 123.782 | -72.805 | 1.00 | 83.90  | D | N |

|      |      |     |     |   |     |         |         |         |      |        |   |   |
|------|------|-----|-----|---|-----|---------|---------|---------|------|--------|---|---|
| ATOM | 6362 | CA  | SER | D | 263 | 147.679 | 123.888 | -73.347 | 1.00 | 83.90  | D | C |
| ATOM | 6363 | CB  | SER | D | 263 | 148.712 | 123.513 | -72.283 | 1.00 | 83.90  | D | C |
| ATOM | 6364 | OG  | SER | D | 263 | 148.532 | 122.176 | -71.851 | 1.00 | 83.90  | D | O |
| ATOM | 6365 | C   | SER | D | 263 | 147.850 | 123.000 | -74.574 | 1.00 | 83.90  | D | C |
| ATOM | 6366 | O   | SER | D | 263 | 148.495 | 123.388 | -75.547 | 1.00 | 83.90  | D | O |
| ATOM | 6367 | N   | ILE | D | 264 | 147.268 | 121.806 | -74.519 | 1.00 | 88.68  | D | N |
| ATOM | 6368 | CA  | ILE | D | 264 | 147.348 | 120.860 | -75.626 | 1.00 | 88.68  | D | C |
| ATOM | 6369 | CB  | ILE | D | 264 | 146.617 | 119.545 | -75.296 | 1.00 | 88.68  | D | C |
| ATOM | 6370 | CG2 | ILE | D | 264 | 146.723 | 118.569 | -76.458 | 1.00 | 88.68  | D | C |
| ATOM | 6371 | CG1 | ILE | D | 264 | 147.183 | 118.925 | -74.017 | 1.00 | 88.68  | D | C |
| ATOM | 6372 | CD1 | ILE | D | 264 | 148.655 | 118.584 | -74.103 | 1.00 | 88.68  | D | C |
| ATOM | 6373 | C   | ILE | D | 264 | 146.757 | 121.454 | -76.900 | 1.00 | 88.68  | D | C |
| ATOM | 6374 | O   | ILE | D | 264 | 147.316 | 121.300 | -77.986 | 1.00 | 88.68  | D | O |
| ATOM | 6375 | N   | ILE | D | 265 | 145.623 | 122.134 | -76.758 | 1.00 | 113.98 | D | N |
| ATOM | 6376 | CA  | ILE | D | 265 | 144.960 | 122.765 | -77.892 | 1.00 | 113.98 | D | C |
| ATOM | 6377 | CB  | ILE | D | 265 | 143.624 | 123.411 | -77.476 | 1.00 | 113.98 | D | C |
| ATOM | 6378 | CG2 | ILE | D | 265 | 142.941 | 124.047 | -78.676 | 1.00 | 113.98 | D | C |
| ATOM | 6379 | CG1 | ILE | D | 265 | 142.711 | 122.371 | -76.823 | 1.00 | 113.98 | D | C |
| ATOM | 6380 | CD1 | ILE | D | 265 | 141.373 | 122.923 | -76.383 | 1.00 | 113.98 | D | C |
| ATOM | 6381 | C   | ILE | D | 265 | 145.855 | 123.826 | -78.525 | 1.00 | 113.98 | D | C |
| ATOM | 6382 | O   | ILE | D | 265 | 145.883 | 123.981 | -79.745 | 1.00 | 113.98 | D | O |
| ATOM | 6383 | N   | ASP | D | 266 | 146.586 | 124.553 | -77.686 | 1.00 | 68.21  | D | N |
| ATOM | 6384 | CA  | ASP | D | 266 | 147.494 | 125.588 | -78.161 | 1.00 | 68.21  | D | C |
| ATOM | 6385 | CB  | ASP | D | 266 | 148.007 | 126.430 | -76.991 | 1.00 | 68.21  | D | C |
| ATOM | 6386 | CG  | ASP | D | 266 | 146.887 | 127.108 | -76.226 | 1.00 | 68.21  | D | C |
| ATOM | 6387 | OD1 | ASP | D | 266 | 145.851 | 127.427 | -76.846 | 1.00 | 68.21  | D | O |
| ATOM | 6388 | OD2 | ASP | D | 266 | 147.043 | 127.322 | -75.006 | 1.00 | 68.21  | D | O |
| ATOM | 6389 | C   | ASP | D | 266 | 148.667 | 124.979 | -78.923 | 1.00 | 68.21  | D | C |
| ATOM | 6390 | O   | ASP | D | 266 | 149.253 | 125.620 | -79.796 | 1.00 | 68.21  | D | O |
| ATOM | 6391 | N   | VAL | D | 267 | 149.004 | 123.738 | -78.587 | 1.00 | 104.56 | D | N |
| ATOM | 6392 | CA  | VAL | D | 267 | 150.103 | 123.037 | -79.241 | 1.00 | 104.56 | D | C |
| ATOM | 6393 | CB  | VAL | D | 267 | 150.599 | 121.850 | -78.394 | 1.00 | 104.56 | D | C |
| ATOM | 6394 | CG1 | VAL | D | 267 | 151.698 | 121.097 | -79.129 | 1.00 | 104.56 | D | C |
| ATOM | 6395 | CG2 | VAL | D | 267 | 151.091 | 122.334 | -77.039 | 1.00 | 104.56 | D | C |
| ATOM | 6396 | C   | VAL | D | 267 | 149.690 | 122.528 | -80.618 | 1.00 | 104.56 | D | C |
| ATOM | 6397 | O   | VAL | D | 267 | 150.365 | 122.787 | -81.614 | 1.00 | 104.56 | D | O |
| ATOM | 6398 | N   | VAL | D | 268 | 148.576 | 121.806 | -80.666 | 1.00 | 100.82 | D | N |
| ATOM | 6399 | CA  | VAL | D | 268 | 148.076 | 121.240 | -81.914 | 1.00 | 100.82 | D | C |
| ATOM | 6400 | CB  | VAL | D | 268 | 146.843 | 120.346 | -81.668 | 1.00 | 100.82 | D | C |
| ATOM | 6401 | CG1 | VAL | D | 268 | 146.410 | 119.663 | -82.957 | 1.00 | 100.82 | D | C |
| ATOM | 6402 | CG2 | VAL | D | 268 | 147.146 | 119.313 | -80.593 | 1.00 | 100.82 | D | C |
| ATOM | 6403 | C   | VAL | D | 268 | 147.717 | 122.336 | -82.915 | 1.00 | 100.82 | D | C |
| ATOM | 6404 | O   | VAL | D | 268 | 147.605 | 122.084 | -84.115 | 1.00 | 100.82 | D | O |
| ATOM | 6405 | N   | ALA | D | 269 | 147.544 | 123.554 | -82.415 | 1.00 | 69.40  | D | N |
| ATOM | 6406 | CA  | ALA | D | 269 | 147.168 | 124.682 | -83.259 | 1.00 | 69.40  | D | C |
| ATOM | 6407 | CB  | ALA | D | 269 | 146.528 | 125.781 | -82.422 | 1.00 | 69.40  | D | C |
| ATOM | 6408 | C   | ALA | D | 269 | 148.356 | 125.234 | -84.045 | 1.00 | 69.40  | D | C |
| ATOM | 6409 | O   | ALA | D | 269 | 148.197 | 126.133 | -84.871 | 1.00 | 69.40  | D | O |
| ATOM | 6410 | N   | ILE | D | 270 | 149.543 | 124.694 | -83.787 | 1.00 | 105.76 | D | N |
| ATOM | 6411 | CA  | ILE | D | 270 | 150.752 | 125.156 | -84.462 | 1.00 | 105.76 | D | C |
| ATOM | 6412 | CB  | ILE | D | 270 | 151.615 | 126.042 | -83.539 | 1.00 | 105.76 | D | C |
| ATOM | 6413 | CG2 | ILE | D | 270 | 150.830 | 127.262 | -83.082 | 1.00 | 105.76 | D | C |
| ATOM | 6414 | CG1 | ILE | D | 270 | 152.116 | 125.236 | -82.339 | 1.00 | 105.76 | D | C |
| ATOM | 6415 | CD1 | ILE | D | 270 | 152.957 | 126.039 | -81.372 | 1.00 | 105.76 | D | C |
| ATOM | 6416 | C   | ILE | D | 270 | 151.607 | 124.001 | -84.981 | 1.00 | 105.76 | D | C |
| ATOM | 6417 | O   | ILE | D | 270 | 152.565 | 124.215 | -85.723 | 1.00 | 105.76 | D | O |
| ATOM | 6418 | N   | LEU | D | 271 | 151.257 | 122.781 | -84.587 | 1.00 | 71.73  | D | N |
| ATOM | 6419 | CA  | LEU | D | 271 | 152.008 | 121.599 | -85.005 | 1.00 | 71.73  | D | C |
| ATOM | 6420 | CB  | LEU | D | 271 | 151.499 | 120.343 | -84.289 | 1.00 | 71.73  | D | C |
| ATOM | 6421 | CG  | LEU | D | 271 | 151.737 | 120.271 | -82.779 | 1.00 | 71.73  | D | C |
| ATOM | 6422 | CD1 | LEU | D | 271 | 151.129 | 119.002 | -82.201 | 1.00 | 71.73  | D | C |
| ATOM | 6423 | CD2 | LEU | D | 271 | 153.223 | 120.349 | -82.467 | 1.00 | 71.73  | D | C |
| ATOM | 6424 | C   | LEU | D | 271 | 152.001 | 121.388 | -86.522 | 1.00 | 71.73  | D | C |
| ATOM | 6425 | O   | LEU | D | 271 | 153.061 | 121.232 | -87.128 | 1.00 | 71.73  | D | O |
| ATOM | 6426 | N   | PRO | D | 272 | 150.808 | 121.382 | -87.140 | 1.00 | 85.42  | D | N |
| ATOM | 6427 | CA  | PRO | D | 272 | 150.719 | 121.159 | -88.588 | 1.00 | 85.42  | D | C |
| ATOM | 6428 | CD  | PRO | D | 272 | 149.476 | 121.540 | -86.529 | 1.00 | 85.42  | D | C |
| ATOM | 6429 | CB  | PRO | D | 272 | 149.229 | 121.357 | -88.879 | 1.00 | 85.42  | D | C |

|      |      |     |     |   |     |         |         |         |      |        |   |   |
|------|------|-----|-----|---|-----|---------|---------|---------|------|--------|---|---|
| ATOM | 6430 | CG  | PRO | D | 272 | 148.552 | 121.036 | -87.595 | 1.00 | 85.42  | D | C |
| ATOM | 6431 | C   | PRO | D | 272 | 151.543 | 122.164 | -89.388 | 1.00 | 85.42  | D | C |
| ATOM | 6432 | O   | PRO | D | 272 | 151.918 | 121.881 | -90.526 | 1.00 | 85.42  | D | O |
| ATOM | 6433 | N   | TYR | D | 273 | 151.818 | 123.322 | -88.798 | 1.00 | 80.36  | D | N |
| ATOM | 6434 | CA  | TYR | D | 273 | 152.580 | 124.364 | -89.477 | 1.00 | 80.36  | D | C |
| ATOM | 6435 | CB  | TYR | D | 273 | 152.438 | 125.698 | -88.741 | 1.00 | 80.36  | D | C |
| ATOM | 6436 | CG  | TYR | D | 273 | 153.165 | 126.845 | -89.407 | 1.00 | 80.36  | D | C |
| ATOM | 6437 | CD1 | TYR | D | 273 | 152.559 | 127.584 | -90.415 | 1.00 | 80.36  | D | C |
| ATOM | 6438 | CD2 | TYR | D | 273 | 154.455 | 127.188 | -89.028 | 1.00 | 80.36  | D | C |
| ATOM | 6439 | CE1 | TYR | D | 273 | 153.219 | 128.633 | -91.027 | 1.00 | 80.36  | D | C |
| ATOM | 6440 | CE2 | TYR | D | 273 | 155.123 | 128.235 | -89.634 | 1.00 | 80.36  | D | C |
| ATOM | 6441 | CZ  | TYR | D | 273 | 154.501 | 128.954 | -90.633 | 1.00 | 80.36  | D | C |
| ATOM | 6442 | OH  | TYR | D | 273 | 155.162 | 129.998 | -91.239 | 1.00 | 80.36  | D | O |
| ATOM | 6443 | C   | TYR | D | 273 | 154.053 | 123.990 | -89.604 | 1.00 | 80.36  | D | C |
| ATOM | 6444 | O   | TYR | D | 273 | 154.605 | 123.970 | -90.705 | 1.00 | 80.36  | D | O |
| ATOM | 6445 | N   | TYR | D | 274 | 154.685 | 123.693 | -88.473 | 1.00 | 58.29  | D | N |
| ATOM | 6446 | CA  | TYR | D | 274 | 156.101 | 123.345 | -88.455 | 1.00 | 58.29  | D | C |
| ATOM | 6447 | CB  | TYR | D | 274 | 156.636 | 123.350 | -87.022 | 1.00 | 58.29  | D | C |
| ATOM | 6448 | CG  | TYR | D | 274 | 156.601 | 124.710 | -86.364 | 1.00 | 58.29  | D | C |
| ATOM | 6449 | CD1 | TYR | D | 274 | 155.504 | 125.113 | -85.615 | 1.00 | 58.29  | D | C |
| ATOM | 6450 | CD2 | TYR | D | 274 | 157.665 | 125.593 | -86.495 | 1.00 | 58.29  | D | C |
| ATOM | 6451 | CE1 | TYR | D | 274 | 155.468 | 126.357 | -85.013 | 1.00 | 58.29  | D | C |
| ATOM | 6452 | CE2 | TYR | D | 274 | 157.638 | 126.838 | -85.896 | 1.00 | 58.29  | D | C |
| ATOM | 6453 | CZ  | TYR | D | 274 | 156.537 | 127.215 | -85.157 | 1.00 | 58.29  | D | C |
| ATOM | 6454 | OH  | TYR | D | 274 | 156.507 | 128.454 | -84.560 | 1.00 | 58.29  | D | O |
| ATOM | 6455 | C   | TYR | D | 274 | 156.359 | 121.991 | -89.109 | 1.00 | 58.29  | D | C |
| ATOM | 6456 | O   | TYR | D | 274 | 157.306 | 121.835 | -89.879 | 1.00 | 58.29  | D | O |
| ATOM | 6457 | N   | ILE | D | 275 | 155.512 | 121.016 | -88.796 | 1.00 | 98.26  | D | N |
| ATOM | 6458 | CA  | ILE | D | 275 | 155.654 | 119.672 | -89.346 | 1.00 | 98.26  | D | C |
| ATOM | 6459 | CB  | ILE | D | 275 | 154.597 | 118.710 | -88.768 | 1.00 | 98.26  | D | C |
| ATOM | 6460 | CG2 | ILE | D | 275 | 154.726 | 117.333 | -89.400 | 1.00 | 98.26  | D | C |
| ATOM | 6461 | CG1 | ILE | D | 275 | 154.737 | 118.616 | -87.248 | 1.00 | 98.26  | D | C |
| ATOM | 6462 | CD1 | ILE | D | 275 | 153.723 | 117.701 | -86.597 | 1.00 | 98.26  | D | C |
| ATOM | 6463 | C   | ILE | D | 275 | 155.550 | 119.678 | -90.869 | 1.00 | 98.26  | D | C |
| ATOM | 6464 | O   | ILE | D | 275 | 156.308 | 118.994 | -91.555 | 1.00 | 98.26  | D | O |
| ATOM | 6465 | N   | GLY | D | 276 | 154.608 | 120.457 | -91.390 | 1.00 | 33.27  | D | N |
| ATOM | 6466 | CA  | GLY | D | 276 | 154.400 | 120.547 | -92.824 | 1.00 | 33.27  | D | C |
| ATOM | 6467 | C   | GLY | D | 276 | 155.578 | 121.163 | -93.554 | 1.00 | 33.27  | D | C |
| ATOM | 6468 | O   | GLY | D | 276 | 155.960 | 120.706 | -94.630 | 1.00 | 33.27  | D | O |
| ATOM | 6469 | N   | LEU | D | 277 | 156.155 | 122.206 | -92.965 | 1.00 | 135.89 | D | N |
| ATOM | 6470 | CA  | LEU | D | 277 | 157.282 | 122.903 | -93.574 | 1.00 | 135.89 | D | C |
| ATOM | 6471 | CB  | LEU | D | 277 | 157.624 | 124.165 | -92.780 | 1.00 | 135.89 | D | C |
| ATOM | 6472 | CG  | LEU | D | 277 | 158.797 | 124.996 | -93.303 | 1.00 | 135.89 | D | C |
| ATOM | 6473 | CD1 | LEU | D | 277 | 158.566 | 125.402 | -94.751 | 1.00 | 135.89 | D | C |
| ATOM | 6474 | CD2 | LEU | D | 277 | 159.021 | 126.220 | -92.428 | 1.00 | 135.89 | D | C |
| ATOM | 6475 | C   | LEU | D | 277 | 158.509 | 122.002 | -93.677 | 1.00 | 135.89 | D | C |
| ATOM | 6476 | O   | LEU | D | 277 | 159.238 | 122.044 | -94.668 | 1.00 | 135.89 | D | O |
| ATOM | 6477 | N   | VAL | D | 278 | 158.730 | 121.189 | -92.650 | 1.00 | 91.77  | D | N |
| ATOM | 6478 | CA  | VAL | D | 278 | 159.878 | 120.292 | -92.618 | 1.00 | 91.77  | D | C |
| ATOM | 6479 | CB  | VAL | D | 278 | 160.126 | 119.744 | -91.199 | 1.00 | 91.77  | D | C |
| ATOM | 6480 | CG1 | VAL | D | 278 | 161.295 | 118.770 | -91.203 | 1.00 | 91.77  | D | C |
| ATOM | 6481 | CG2 | VAL | D | 278 | 160.379 | 120.884 | -90.227 | 1.00 | 91.77  | D | C |
| ATOM | 6482 | C   | VAL | D | 278 | 159.700 | 119.123 | -93.581 | 1.00 | 91.77  | D | C |
| ATOM | 6483 | O   | VAL | D | 278 | 160.628 | 118.752 | -94.300 | 1.00 | 91.77  | D | O |
| ATOM | 6484 | N   | MET | D | 279 | 158.502 | 118.549 | -93.592 | 1.00 | 131.98 | D | N |
| ATOM | 6485 | CA  | MET | D | 279 | 158.210 | 117.400 | -94.443 | 1.00 | 131.98 | D | C |
| ATOM | 6486 | CB  | MET | D | 279 | 156.816 | 116.846 | -94.141 | 1.00 | 131.98 | D | C |
| ATOM | 6487 | CG  | MET | D | 279 | 156.448 | 115.618 | -94.957 | 1.00 | 131.98 | D | C |
| ATOM | 6488 | SD  | MET | D | 279 | 154.825 | 114.957 | -94.535 | 1.00 | 131.98 | D | S |
| ATOM | 6489 | CE  | MET | D | 279 | 155.067 | 114.532 | -92.812 | 1.00 | 131.98 | D | C |
| ATOM | 6490 | C   | MET | D | 279 | 158.329 | 117.748 | -95.924 | 1.00 | 131.98 | D | C |
| ATOM | 6491 | O   | MET | D | 279 | 158.967 | 117.026 | -96.690 | 1.00 | 131.98 | D | O |
| ATOM | 6492 | N   | THR | D | 280 | 157.712 | 118.856 | -96.322 | 1.00 | 57.64  | D | N |
| ATOM | 6493 | CA  | THR | D | 280 | 157.742 | 119.290 | -97.715 | 1.00 | 57.64  | D | C |
| ATOM | 6494 | CB  | THR | D | 280 | 156.803 | 120.487 | -97.957 | 1.00 | 57.64  | D | C |
| ATOM | 6495 | OG1 | THR | D | 280 | 157.182 | 121.575 | -97.106 | 1.00 | 57.64  | D | O |
| ATOM | 6496 | CG2 | THR | D | 280 | 155.361 | 120.100 | -97.667 | 1.00 | 57.64  | D | C |
| ATOM | 6497 | C   | THR | D | 280 | 159.153 | 119.665 | -98.156 | 1.00 | 57.64  | D | C |

|      |      |     |     |   |     |         |         |          |      |        |   |   |
|------|------|-----|-----|---|-----|---------|---------|----------|------|--------|---|---|
| ATOM | 6498 | O   | THR | D | 280 | 159.459 | 119.675 | -99.348  | 1.00 | 57.64  | D | O |
| ATOM | 6499 | N   | ASP | D | 281 | 160.009 | 119.975 | -97.187  | 1.00 | 89.40  | D | N |
| ATOM | 6500 | CA  | ASP | D | 281 | 161.390 | 120.342 | -97.475  | 1.00 | 89.40  | D | C |
| ATOM | 6501 | CB  | ASP | D | 281 | 161.986 | 121.135 | -96.310  | 1.00 | 89.40  | D | C |
| ATOM | 6502 | CG  | ASP | D | 281 | 163.315 | 121.779 | -96.657  | 1.00 | 89.40  | D | C |
| ATOM | 6503 | OD1 | ASP | D | 281 | 164.055 | 121.219 | -97.493  | 1.00 | 89.40  | D | O |
| ATOM | 6504 | OD2 | ASP | D | 281 | 163.621 | 122.850 | -96.092  | 1.00 | 89.40  | D | O |
| ATOM | 6505 | C   | ASP | D | 281 | 162.228 | 119.098 | -97.749  | 1.00 | 89.40  | D | C |
| ATOM | 6506 | O   | ASP | D | 281 | 162.976 | 119.043 | -98.725  | 1.00 | 89.40  | D | O |
| ATOM | 6507 | N   | ASN | D | 282 | 162.095 | 118.101 | -96.881  | 1.00 | 77.30  | D | N |
| ATOM | 6508 | CA  | ASN | D | 282 | 162.846 | 116.858 | -97.018  | 1.00 | 77.30  | D | C |
| ATOM | 6509 | CB  | ASN | D | 282 | 162.624 | 115.963 | -95.798  | 1.00 | 77.30  | D | C |
| ATOM | 6510 | CG  | ASN | D | 282 | 163.082 | 116.612 | -94.507  | 1.00 | 77.30  | D | C |
| ATOM | 6511 | OD1 | ASN | D | 282 | 164.013 | 117.417 | -94.499  | 1.00 | 77.30  | D | O |
| ATOM | 6512 | ND2 | ASN | D | 282 | 162.427 | 116.264 | -93.405  | 1.00 | 77.30  | D | N |
| ATOM | 6513 | C   | ASN | D | 282 | 162.494 | 116.101 | -98.295  | 1.00 | 77.30  | D | C |
| ATOM | 6514 | O   | ASN | D | 282 | 163.351 | 115.875 | -99.150  | 1.00 | 77.30  | D | O |
| ATOM | 6515 | N   | GLU | D | 283 | 161.229 | 115.712 | -98.418  | 1.00 | 247.84 | D | N |
| ATOM | 6516 | CA  | GLU | D | 283 | 160.768 | 114.968 | -99.584  | 1.00 | 247.84 | D | C |
| ATOM | 6517 | CB  | GLU | D | 283 | 160.652 | 113.477 | -99.256  | 1.00 | 247.84 | D | C |
| ATOM | 6518 | CG  | GLU | D | 283 | 160.214 | 112.604 | -100.424 | 1.00 | 247.84 | D | C |
| ATOM | 6519 | CD  | GLU | D | 283 | 161.260 | 112.508 | -101.521 | 1.00 | 247.84 | D | C |
| ATOM | 6520 | OE1 | GLU | D | 283 | 161.832 | 113.550 | -101.903 | 1.00 | 247.84 | D | O |
| ATOM | 6521 | OE2 | GLU | D | 283 | 161.512 | 111.383 | -102.002 | 1.00 | 247.84 | D | O |
| ATOM | 6522 | C   | GLU | D | 283 | 159.433 | 115.502 | -100.094 | 1.00 | 247.84 | D | C |
| ATOM | 6523 | O   | GLU | D | 283 | 158.583 | 115.927 | -99.311  | 1.00 | 247.84 | D | O |
| ATOM | 6524 | N   | ASP | D | 284 | 159.256 | 115.477 | -101.411 | 1.00 | 243.54 | D | N |
| ATOM | 6525 | CA  | ASP | D | 284 | 158.038 | 115.984 | -102.034 | 1.00 | 243.54 | D | C |
| ATOM | 6526 | CB  | ASP | D | 284 | 158.371 | 116.775 | -103.304 | 1.00 | 243.54 | D | C |
| ATOM | 6527 | CG  | ASP | D | 284 | 159.114 | 115.944 | -104.335 | 1.00 | 243.54 | D | C |
| ATOM | 6528 | OD1 | ASP | D | 284 | 159.867 | 115.028 | -103.942 | 1.00 | 243.54 | D | O |
| ATOM | 6529 | OD2 | ASP | D | 284 | 158.944 | 116.209 | -105.544 | 1.00 | 243.54 | D | O |
| ATOM | 6530 | C   | ASP | D | 284 | 157.045 | 114.867 | -102.347 | 1.00 | 243.54 | D | C |
| ATOM | 6531 | O   | ASP | D | 284 | 156.832 | 114.517 | -103.509 | 1.00 | 243.54 | D | O |
| ATOM | 6532 | N   | VAL | D | 285 | 156.437 | 114.311 | -101.304 | 1.00 | 154.00 | D | N |
| ATOM | 6533 | CA  | VAL | D | 285 | 155.437 | 113.262 | -101.469 | 1.00 | 154.00 | D | C |
| ATOM | 6534 | CB  | VAL | D | 285 | 155.769 | 112.022 | -100.617 | 1.00 | 154.00 | D | C |
| ATOM | 6535 | CG1 | VAL | D | 285 | 157.024 | 111.339 | -101.139 | 1.00 | 154.00 | D | C |
| ATOM | 6536 | CG2 | VAL | D | 285 | 155.928 | 112.410 | -99.154  | 1.00 | 154.00 | D | C |
| ATOM | 6537 | C   | VAL | D | 285 | 154.047 | 113.767 | -101.097 | 1.00 | 154.00 | D | C |
| ATOM | 6538 | O   | VAL | D | 285 | 153.854 | 114.958 | -100.854 | 1.00 | 154.00 | D | O |
| ATOM | 6539 | N   | SER | D | 286 | 153.082 | 112.854 | -101.055 | 1.00 | 204.33 | D | N |
| ATOM | 6540 | CA  | SER | D | 286 | 151.708 | 113.207 | -100.720 | 1.00 | 204.33 | D | C |
| ATOM | 6541 | CB  | SER | D | 286 | 150.908 | 113.508 | -101.988 | 1.00 | 204.33 | D | C |
| ATOM | 6542 | OG  | SER | D | 286 | 151.489 | 114.575 | -102.717 | 1.00 | 204.33 | D | O |
| ATOM | 6543 | C   | SER | D | 286 | 151.029 | 112.098 | -99.924  | 1.00 | 204.33 | D | C |
| ATOM | 6544 | O   | SER | D | 286 | 151.211 | 110.914 | -100.210 | 1.00 | 204.33 | D | O |
| ATOM | 6545 | N   | GLY | D | 287 | 150.247 | 112.488 | -98.923  | 1.00 | 74.32  | D | N |
| ATOM | 6546 | CA  | GLY | D | 287 | 149.531 | 111.531 | -98.099  | 1.00 | 74.32  | D | C |
| ATOM | 6547 | C   | GLY | D | 287 | 149.756 | 111.742 | -96.614  | 1.00 | 74.32  | D | C |
| ATOM | 6548 | O   | GLY | D | 287 | 148.830 | 111.614 | -95.813  | 1.00 | 74.32  | D | O |
| ATOM | 6549 | N   | ALA | D | 288 | 150.991 | 112.065 | -96.246  | 1.00 | 54.17  | D | N |
| ATOM | 6550 | CA  | ALA | D | 288 | 151.344 | 112.267 | -94.845  | 1.00 | 54.17  | D | C |
| ATOM | 6551 | CB  | ALA | D | 288 | 152.833 | 112.039 | -94.636  | 1.00 | 54.17  | D | C |
| ATOM | 6552 | C   | ALA | D | 288 | 150.941 | 113.656 | -94.357  | 1.00 | 54.17  | D | C |
| ATOM | 6553 | O   | ALA | D | 288 | 150.197 | 113.789 | -93.386  | 1.00 | 54.17  | D | O |
| ATOM | 6554 | N   | PHE | D | 289 | 151.436 | 114.686 | -95.036  | 1.00 | 205.64 | D | N |
| ATOM | 6555 | CA  | PHE | D | 289 | 151.144 | 116.066 | -94.657  | 1.00 | 205.64 | D | C |
| ATOM | 6556 | CB  | PHE | D | 289 | 152.112 | 117.037 | -95.344  | 1.00 | 205.64 | D | C |
| ATOM | 6557 | CG  | PHE | D | 289 | 151.950 | 117.110 | -96.839  | 1.00 | 205.64 | D | C |
| ATOM | 6558 | CD1 | PHE | D | 289 | 151.434 | 116.042 | -97.554  | 1.00 | 205.64 | D | C |
| ATOM | 6559 | CD2 | PHE | D | 289 | 152.319 | 118.253 | -97.529  | 1.00 | 205.64 | D | C |
| ATOM | 6560 | CE1 | PHE | D | 289 | 151.288 | 116.113 | -98.927  | 1.00 | 205.64 | D | C |
| ATOM | 6561 | CE2 | PHE | D | 289 | 152.175 | 118.330 | -98.901  | 1.00 | 205.64 | D | C |
| ATOM | 6562 | CZ  | PHE | D | 289 | 151.660 | 117.259 | -99.600  | 1.00 | 205.64 | D | C |
| ATOM | 6563 | C   | PHE | D | 289 | 149.699 | 116.452 | -94.963  | 1.00 | 205.64 | D | C |
| ATOM | 6564 | O   | PHE | D | 289 | 149.256 | 117.549 | -94.626  | 1.00 | 205.64 | D | O |
| ATOM | 6565 | N   | VAL | D | 290 | 148.972 | 115.544 | -95.605  | 1.00 | 43.82  | D | N |

|      |      |     |     |   |     |         |         |         |      |        |   |   |
|------|------|-----|-----|---|-----|---------|---------|---------|------|--------|---|---|
| ATOM | 6566 | CA  | VAL | D | 290 | 147.571 | 115.779 | -95.933 | 1.00 | 43.82  | D | C |
| ATOM | 6567 | CB  | VAL | D | 290 | 147.063 | 114.776 | -96.988 | 1.00 | 43.82  | D | C |
| ATOM | 6568 | CG1 | VAL | D | 290 | 145.588 | 115.008 | -97.276 | 1.00 | 43.82  | D | C |
| ATOM | 6569 | CG2 | VAL | D | 290 | 147.885 | 114.887 | -98.263 | 1.00 | 43.82  | D | C |
| ATOM | 6570 | C   | VAL | D | 290 | 146.702 | 115.682 | -94.684 | 1.00 | 43.82  | D | C |
| ATOM | 6571 | O   | VAL | D | 290 | 145.734 | 116.428 | -94.528 | 1.00 | 43.82  | D | O |
| ATOM | 6572 | N   | THR | D | 291 | 147.056 | 114.760 | -93.794 | 1.00 | 50.43  | D | N |
| ATOM | 6573 | CA  | THR | D | 291 | 146.316 | 114.565 | -92.554 | 1.00 | 50.43  | D | C |
| ATOM | 6574 | CB  | THR | D | 291 | 146.759 | 113.280 | -91.827 | 1.00 | 50.43  | D | C |
| ATOM | 6575 | OG1 | THR | D | 291 | 146.599 | 112.154 | -92.700 | 1.00 | 50.43  | D | O |
| ATOM | 6576 | CG2 | THR | D | 291 | 145.931 | 113.064 | -90.571 | 1.00 | 50.43  | D | C |
| ATOM | 6577 | C   | THR | D | 291 | 146.486 | 115.757 | -91.617 | 1.00 | 50.43  | D | C |
| ATOM | 6578 | O   | THR | D | 291 | 145.543 | 116.167 | -90.941 | 1.00 | 50.43  | D | O |
| ATOM | 6579 | N   | LEU | D | 292 | 147.695 | 116.311 | -91.583 | 1.00 | 89.67  | D | N |
| ATOM | 6580 | CA  | LEU | D | 292 | 147.990 | 117.462 | -90.736 | 1.00 | 89.67  | D | C |
| ATOM | 6581 | CB  | LEU | D | 292 | 149.481 | 117.809 | -90.789 | 1.00 | 89.67  | D | C |
| ATOM | 6582 | CG  | LEU | D | 292 | 150.458 | 116.881 | -90.060 | 1.00 | 89.67  | D | C |
| ATOM | 6583 | CD1 | LEU | D | 292 | 150.110 | 116.793 | -88.581 | 1.00 | 89.67  | D | C |
| ATOM | 6584 | CD2 | LEU | D | 292 | 150.488 | 115.496 | -90.690 | 1.00 | 89.67  | D | C |
| ATOM | 6585 | C   | LEU | D | 292 | 147.157 | 118.674 | -91.140 | 1.00 | 89.67  | D | C |
| ATOM | 6586 | O   | LEU | D | 292 | 146.876 | 119.548 | -90.319 | 1.00 | 89.67  | D | O |
| ATOM | 6587 | N   | ARG | D | 293 | 146.768 | 118.722 | -92.409 | 1.00 | 153.52 | D | N |
| ATOM | 6588 | CA  | ARG | D | 293 | 145.946 | 119.811 | -92.919 | 1.00 | 153.52 | D | C |
| ATOM | 6589 | CB  | ARG | D | 293 | 145.746 | 119.662 | -94.430 | 1.00 | 153.52 | D | C |
| ATOM | 6590 | CG  | ARG | D | 293 | 145.317 | 120.936 | -95.150 | 1.00 | 153.52 | D | C |
| ATOM | 6591 | CD  | ARG | D | 293 | 143.877 | 121.309 | -94.839 | 1.00 | 153.52 | D | C |
| ATOM | 6592 | NE  | ARG | D | 293 | 143.456 | 122.510 | -95.554 | 1.00 | 153.52 | D | N |
| ATOM | 6593 | CZ  | ARG | D | 293 | 142.263 | 123.079 | -95.419 | 1.00 | 153.52 | D | C |
| ATOM | 6594 | NH1 | ARG | D | 293 | 141.369 | 122.558 | -94.592 | 1.00 | 153.52 | D | N |
| ATOM | 6595 | NH2 | ARG | D | 293 | 141.964 | 124.171 | -96.110 | 1.00 | 153.52 | D | N |
| ATOM | 6596 | C   | ARG | D | 293 | 144.601 | 119.824 | -92.200 | 1.00 | 153.52 | D | C |
| ATOM | 6597 | O   | ARG | D | 293 | 144.095 | 120.881 | -91.824 | 1.00 | 153.52 | D | O |
| ATOM | 6598 | N   | VAL | D | 294 | 144.031 | 118.639 | -92.007 | 1.00 | 148.57 | D | N |
| ATOM | 6599 | CA  | VAL | D | 294 | 142.755 | 118.503 | -91.315 | 1.00 | 148.57 | D | C |
| ATOM | 6600 | CB  | VAL | D | 294 | 142.243 | 117.050 | -91.362 | 1.00 | 148.57 | D | C |
| ATOM | 6601 | CG1 | VAL | D | 294 | 140.901 | 116.935 | -90.656 | 1.00 | 148.57 | D | C |
| ATOM | 6602 | CG2 | VAL | D | 294 | 142.135 | 116.574 | -92.802 | 1.00 | 148.57 | D | C |
| ATOM | 6603 | C   | VAL | D | 294 | 142.873 | 118.948 | -89.860 | 1.00 | 148.57 | D | C |
| ATOM | 6604 | O   | VAL | D | 294 | 141.923 | 119.478 | -89.282 | 1.00 | 148.57 | D | O |
| ATOM | 6605 | N   | PHE | D | 295 | 144.047 | 118.733 | -89.274 | 1.00 | 171.25 | D | N |
| ATOM | 6606 | CA  | PHE | D | 295 | 144.292 | 119.107 | -87.886 | 1.00 | 171.25 | D | C |
| ATOM | 6607 | CB  | PHE | D | 295 | 145.595 | 118.483 | -87.383 | 1.00 | 171.25 | D | C |
| ATOM | 6608 | CG  | PHE | D | 295 | 145.568 | 116.982 | -87.333 | 1.00 | 171.25 | D | C |
| ATOM | 6609 | CD1 | PHE | D | 295 | 144.365 | 116.298 | -87.301 | 1.00 | 171.25 | D | C |
| ATOM | 6610 | CD2 | PHE | D | 295 | 146.747 | 116.255 | -87.316 | 1.00 | 171.25 | D | C |
| ATOM | 6611 | CE1 | PHE | D | 295 | 144.337 | 114.917 | -87.254 | 1.00 | 171.25 | D | C |
| ATOM | 6612 | CE2 | PHE | D | 295 | 146.726 | 114.874 | -87.270 | 1.00 | 171.25 | D | C |
| ATOM | 6613 | CZ  | PHE | D | 295 | 145.519 | 114.204 | -87.239 | 1.00 | 171.25 | D | C |
| ATOM | 6614 | C   | PHE | D | 295 | 144.336 | 120.622 | -87.712 | 1.00 | 171.25 | D | C |
| ATOM | 6615 | O   | PHE | D | 295 | 144.284 | 121.128 | -86.591 | 1.00 | 171.25 | D | O |
| ATOM | 6616 | N   | ARG | D | 296 | 144.432 | 121.341 | -88.825 | 1.00 | 159.61 | D | N |
| ATOM | 6617 | CA  | ARG | D | 296 | 144.465 | 122.798 | -88.794 | 1.00 | 159.61 | D | C |
| ATOM | 6618 | CB  | ARG | D | 296 | 144.985 | 123.352 | -90.122 | 1.00 | 159.61 | D | C |
| ATOM | 6619 | CG  | ARG | D | 296 | 146.395 | 122.904 | -90.472 | 1.00 | 159.61 | D | C |
| ATOM | 6620 | CD  | ARG | D | 296 | 146.842 | 123.462 | -91.815 | 1.00 | 159.61 | D | C |
| ATOM | 6621 | NE  | ARG | D | 296 | 146.870 | 124.922 | -91.825 | 1.00 | 159.61 | D | N |
| ATOM | 6622 | CZ  | ARG | D | 296 | 145.881 | 125.687 | -92.276 | 1.00 | 159.61 | D | C |
| ATOM | 6623 | NH1 | ARG | D | 296 | 144.778 | 125.132 | -92.760 | 1.00 | 159.61 | D | N |
| ATOM | 6624 | NH2 | ARG | D | 296 | 145.995 | 127.008 | -92.245 | 1.00 | 159.61 | D | N |
| ATOM | 6625 | C   | ARG | D | 296 | 143.085 | 123.372 | -88.490 | 1.00 | 159.61 | D | C |
| ATOM | 6626 | O   | ARG | D | 296 | 142.931 | 124.578 | -88.300 | 1.00 | 159.61 | D | O |
| ATOM | 6627 | N   | VAL | D | 297 | 142.084 | 122.499 | -88.445 | 1.00 | 167.62 | D | N |
| ATOM | 6628 | CA  | VAL | D | 297 | 140.719 | 122.912 | -88.145 | 1.00 | 167.62 | D | C |
| ATOM | 6629 | CB  | VAL | D | 297 | 139.691 | 121.968 | -88.802 | 1.00 | 167.62 | D | C |
| ATOM | 6630 | CG1 | VAL | D | 297 | 138.274 | 122.465 | -88.557 | 1.00 | 167.62 | D | C |
| ATOM | 6631 | CG2 | VAL | D | 297 | 139.963 | 121.845 | -90.292 | 1.00 | 167.62 | D | C |
| ATOM | 6632 | C   | VAL | D | 297 | 140.491 | 122.944 | -86.637 | 1.00 | 167.62 | D | C |
| ATOM | 6633 | O   | VAL | D | 297 | 139.562 | 123.589 | -86.151 | 1.00 | 167.62 | D | O |

|      |      |     |     |   |     |         |         |         |      |        |   |   |
|------|------|-----|-----|---|-----|---------|---------|---------|------|--------|---|---|
| ATOM | 6634 | N   | PHE | D | 298 | 141.353 | 122.251 | -85.901 | 1.00 | 121.45 | D | N |
| ATOM | 6635 | CA  | PHE | D | 298 | 141.237 | 122.176 | -84.449 | 1.00 | 121.45 | D | C |
| ATOM | 6636 | CB  | PHE | D | 298 | 142.102 | 121.039 | -83.900 | 1.00 | 121.45 | D | C |
| ATOM | 6637 | CG  | PHE | D | 298 | 141.667 | 119.674 | -84.352 | 1.00 | 121.45 | D | C |
| ATOM | 6638 | CD1 | PHE | D | 298 | 140.382 | 119.461 | -84.822 | 1.00 | 121.45 | D | C |
| ATOM | 6639 | CD2 | PHE | D | 298 | 142.544 | 118.603 | -84.306 | 1.00 | 121.45 | D | C |
| ATOM | 6640 | CE1 | PHE | D | 298 | 139.979 | 118.206 | -85.238 | 1.00 | 121.45 | D | C |
| ATOM | 6641 | CE2 | PHE | D | 298 | 142.147 | 117.346 | -84.721 | 1.00 | 121.45 | D | C |
| ATOM | 6642 | CZ  | PHE | D | 298 | 140.863 | 117.147 | -85.188 | 1.00 | 121.45 | D | C |
| ATOM | 6643 | C   | PHE | D | 298 | 141.608 | 123.492 | -83.772 | 1.00 | 121.45 | D | C |
| ATOM | 6644 | O   | PHE | D | 298 | 141.609 | 123.589 | -82.545 | 1.00 | 121.45 | D | O |
| ATOM | 6645 | N   | ARG | D | 299 | 141.923 | 124.503 | -84.576 | 1.00 | 168.10 | D | N |
| ATOM | 6646 | CA  | ARG | D | 299 | 142.263 | 125.819 | -84.047 | 1.00 | 168.10 | D | C |
| ATOM | 6647 | CB  | ARG | D | 299 | 142.951 | 126.669 | -85.117 | 1.00 | 168.10 | D | C |
| ATOM | 6648 | CG  | ARG | D | 299 | 142.096 | 126.933 | -86.346 | 1.00 | 168.10 | D | C |
| ATOM | 6649 | CD  | ARG | D | 299 | 142.852 | 127.758 | -87.375 | 1.00 | 168.10 | D | C |
| ATOM | 6650 | NE  | ARG | D | 299 | 144.085 | 127.102 | -87.799 | 1.00 | 168.10 | D | N |
| ATOM | 6651 | CZ  | ARG | D | 299 | 144.912 | 127.586 | -88.720 | 1.00 | 168.10 | D | C |
| ATOM | 6652 | NH1 | ARG | D | 299 | 144.638 | 128.736 | -89.321 | 1.00 | 168.10 | D | N |
| ATOM | 6653 | NH2 | ARG | D | 299 | 146.012 | 126.920 | -89.042 | 1.00 | 168.10 | D | N |
| ATOM | 6654 | C   | ARG | D | 299 | 141.019 | 126.531 | -83.528 | 1.00 | 168.10 | D | C |
| ATOM | 6655 | O   | ARG | D | 299 | 141.112 | 127.579 | -82.888 | 1.00 | 168.10 | D | O |
| ATOM | 6656 | N   | ILE | D | 300 | 139.855 | 125.955 | -83.810 | 1.00 | 203.46 | D | N |
| ATOM | 6657 | CA  | ILE | D | 300 | 138.588 | 126.514 | -83.357 | 1.00 | 203.46 | D | C |
| ATOM | 6658 | CB  | ILE | D | 300 | 137.411 | 125.993 | -84.202 | 1.00 | 203.46 | D | C |
| ATOM | 6659 | CG2 | ILE | D | 300 | 136.117 | 126.686 | -83.803 | 1.00 | 203.46 | D | C |
| ATOM | 6660 | CG1 | ILE | D | 300 | 137.696 | 126.196 | -85.691 | 1.00 | 203.46 | D | C |
| ATOM | 6661 | CD1 | ILE | D | 300 | 136.608 | 125.671 | -86.598 | 1.00 | 203.46 | D | C |
| ATOM | 6662 | C   | ILE | D | 300 | 138.347 | 126.174 | -81.890 | 1.00 | 203.46 | D | C |
| ATOM | 6663 | O   | ILE | D | 300 | 137.604 | 126.866 | -81.194 | 1.00 | 203.46 | D | O |
| ATOM | 6664 | N   | PHE | D | 301 | 138.985 | 125.105 | -81.425 | 1.00 | 106.14 | D | N |
| ATOM | 6665 | CA  | PHE | D | 301 | 138.860 | 124.682 | -80.034 | 1.00 | 106.14 | D | C |
| ATOM | 6666 | CB  | PHE | D | 301 | 139.368 | 123.249 | -79.861 | 1.00 | 106.14 | D | C |
| ATOM | 6667 | CG  | PHE | D | 301 | 138.546 | 122.222 | -80.585 | 1.00 | 106.14 | D | C |
| ATOM | 6668 | CD1 | PHE | D | 301 | 137.226 | 122.479 | -80.915 | 1.00 | 106.14 | D | C |
| ATOM | 6669 | CD2 | PHE | D | 301 | 139.093 | 120.999 | -80.937 | 1.00 | 106.14 | D | C |
| ATOM | 6670 | CE1 | PHE | D | 301 | 136.468 | 121.537 | -81.581 | 1.00 | 106.14 | D | C |
| ATOM | 6671 | CE2 | PHE | D | 301 | 138.339 | 120.052 | -81.603 | 1.00 | 106.14 | D | C |
| ATOM | 6672 | CZ  | PHE | D | 301 | 137.025 | 120.322 | -81.926 | 1.00 | 106.14 | D | C |
| ATOM | 6673 | C   | PHE | D | 301 | 139.618 | 125.621 | -79.101 | 1.00 | 106.14 | D | C |
| ATOM | 6674 | O   | PHE | D | 301 | 139.701 | 125.379 | -77.898 | 1.00 | 106.14 | D | O |
| ATOM | 6675 | N   | LYS | D | 302 | 140.169 | 126.692 | -79.663 | 1.00 | 168.00 | D | N |
| ATOM | 6676 | CA  | LYS | D | 302 | 140.929 | 127.660 | -78.882 | 1.00 | 168.00 | D | C |
| ATOM | 6677 | CB  | LYS | D | 302 | 141.921 | 128.409 | -79.776 | 1.00 | 168.00 | D | C |
| ATOM | 6678 | CG  | LYS | D | 302 | 142.936 | 129.248 | -79.017 | 1.00 | 168.00 | D | C |
| ATOM | 6679 | CD  | LYS | D | 302 | 143.941 | 129.887 | -79.961 | 1.00 | 168.00 | D | C |
| ATOM | 6680 | CE  | LYS | D | 302 | 144.703 | 128.839 | -80.755 | 1.00 | 168.00 | D | C |
| ATOM | 6681 | NZ  | LYS | D | 302 | 145.478 | 127.926 | -79.871 | 1.00 | 168.00 | D | N |
| ATOM | 6682 | C   | LYS | D | 302 | 139.996 | 128.642 | -78.178 | 1.00 | 168.00 | D | C |
| ATOM | 6683 | O   | LYS | D | 302 | 140.407 | 129.356 | -77.263 | 1.00 | 168.00 | D | O |
| ATOM | 6684 | N   | PHE | D | 303 | 138.739 | 128.670 | -78.608 | 1.00 | 83.96  | D | N |
| ATOM | 6685 | CA  | PHE | D | 303 | 137.738 | 129.530 | -77.987 | 1.00 | 83.96  | D | C |
| ATOM | 6686 | CB  | PHE | D | 303 | 136.491 | 129.639 | -78.868 | 1.00 | 83.96  | D | C |
| ATOM | 6687 | CG  | PHE | D | 303 | 136.705 | 130.422 | -80.131 | 1.00 | 83.96  | D | C |
| ATOM | 6688 | CD1 | PHE | D | 303 | 136.686 | 131.806 | -80.114 | 1.00 | 83.96  | D | C |
| ATOM | 6689 | CD2 | PHE | D | 303 | 136.912 | 129.774 | -81.338 | 1.00 | 83.96  | D | C |
| ATOM | 6690 | CE1 | PHE | D | 303 | 136.879 | 132.531 | -81.275 | 1.00 | 83.96  | D | C |
| ATOM | 6691 | CE2 | PHE | D | 303 | 137.105 | 130.493 | -82.502 | 1.00 | 83.96  | D | C |
| ATOM | 6692 | CZ  | PHE | D | 303 | 137.088 | 131.873 | -82.470 | 1.00 | 83.96  | D | C |
| ATOM | 6693 | C   | PHE | D | 303 | 137.352 | 129.013 | -76.605 | 1.00 | 83.96  | D | C |
| ATOM | 6694 | O   | PHE | D | 303 | 136.679 | 129.704 | -75.841 | 1.00 | 83.96  | D | O |
| ATOM | 6695 | N   | SER | D | 304 | 137.780 | 127.795 | -76.292 | 1.00 | 64.30  | D | N |
| ATOM | 6696 | CA  | SER | D | 304 | 137.479 | 127.183 | -75.002 | 1.00 | 64.30  | D | C |
| ATOM | 6697 | CB  | SER | D | 304 | 137.942 | 125.725 | -74.978 | 1.00 | 64.30  | D | C |
| ATOM | 6698 | OG  | SER | D | 304 | 139.343 | 125.632 | -75.168 | 1.00 | 64.30  | D | O |
| ATOM | 6699 | C   | SER | D | 304 | 138.129 | 127.958 | -73.861 | 1.00 | 64.30  | D | C |
| ATOM | 6700 | O   | SER | D | 304 | 137.650 | 127.932 | -72.728 | 1.00 | 64.30  | D | O |
| ATOM | 6701 | N   | ARG | D | 305 | 139.224 | 128.646 | -74.169 | 1.00 | 148.97 | D | N |

|      |      |     |     |   |     |         |         |         |            |   |   |
|------|------|-----|-----|---|-----|---------|---------|---------|------------|---|---|
| ATOM | 6702 | CA  | ARG | D | 305 | 139.934 | 129.439 | -73.174 | 1.00148.97 | D | C |
| ATOM | 6703 | CB  | ARG | D | 305 | 141.396 | 129.624 | -73.586 | 1.00148.97 | D | C |
| ATOM | 6704 | CG  | ARG | D | 305 | 142.274 | 130.250 | -72.515 | 1.00148.97 | D | C |
| ATOM | 6705 | CD  | ARG | D | 305 | 143.717 | 130.353 | -72.978 | 1.00148.97 | D | C |
| ATOM | 6706 | NE  | ARG | D | 305 | 144.589 | 130.889 | -71.937 | 1.00148.97 | D | N |
| ATOM | 6707 | CZ  | ARG | D | 305 | 145.224 | 130.144 | -71.038 | 1.00148.97 | D | C |
| ATOM | 6708 | NH1 | ARG | D | 305 | 145.086 | 128.826 | -71.050 | 1.00148.97 | D | N |
| ATOM | 6709 | NH2 | ARG | D | 305 | 145.998 | 130.718 | -70.127 | 1.00148.97 | D | N |
| ATOM | 6710 | C   | ARG | D | 305 | 139.260 | 130.795 | -72.991 | 1.00148.97 | D | C |
| ATOM | 6711 | O   | ARG | D | 305 | 139.554 | 131.526 | -72.045 | 1.00148.97 | D | O |
| ATOM | 6712 | N   | HIS | D | 306 | 138.350 | 131.123 | -73.902 | 1.00 99.22 | D | N |
| ATOM | 6713 | CA  | HIS | D | 306 | 137.629 | 132.388 | -73.847 | 1.00 99.22 | D | C |
| ATOM | 6714 | ND1 | HIS | D | 306 | 139.825 | 132.346 | -76.118 | 1.00 99.22 | D | N |
| ATOM | 6715 | CG  | HIS | D | 306 | 138.902 | 133.328 | -75.827 | 1.00 99.22 | D | C |
| ATOM | 6716 | CB  | HIS | D | 306 | 137.561 | 133.027 | -75.235 | 1.00 99.22 | D | C |
| ATOM | 6717 | NE2 | HIS | D | 306 | 140.726 | 134.208 | -76.675 | 1.00 99.22 | D | N |
| ATOM | 6718 | CD2 | HIS | D | 306 | 139.478 | 134.501 | -76.182 | 1.00 99.22 | D | C |
| ATOM | 6719 | CE1 | HIS | D | 306 | 140.910 | 132.901 | -76.626 | 1.00 99.22 | D | C |
| ATOM | 6720 | C   | HIS | D | 306 | 136.222 | 132.197 | -73.290 | 1.00 99.22 | D | C |
| ATOM | 6721 | O   | HIS | D | 306 | 135.854 | 132.803 | -72.284 | 1.00 99.22 | D | O |
| ATOM | 6722 | N   | SER | D | 307 | 135.439 | 131.351 | -73.952 | 1.00102.77 | D | N |
| ATOM | 6723 | CA  | SER | D | 307 | 134.073 | 131.076 | -73.525 | 1.00102.77 | D | C |
| ATOM | 6724 | CB  | SER | D | 307 | 133.192 | 130.742 | -74.730 | 1.00102.77 | D | C |
| ATOM | 6725 | OG  | SER | D | 307 | 133.161 | 131.816 | -75.653 | 1.00102.77 | D | O |
| ATOM | 6726 | C   | SER | D | 307 | 134.032 | 129.938 | -72.510 | 1.00102.77 | D | C |
| ATOM | 6727 | O   | SER | D | 307 | 134.923 | 129.090 | -72.478 | 1.00102.77 | D | O |
| ATOM | 6728 | N   | GLN | D | 308 | 132.991 | 129.926 | -71.685 | 1.00121.93 | D | N |
| ATOM | 6729 | CA  | GLN | D | 308 | 132.839 | 128.905 | -70.655 | 1.00121.93 | D | C |
| ATOM | 6730 | CB  | GLN | D | 308 | 132.268 | 129.520 | -69.376 | 1.00121.93 | D | C |
| ATOM | 6731 | CG  | GLN | D | 308 | 133.082 | 130.682 | -68.829 | 1.00121.93 | D | C |
| ATOM | 6732 | CD  | GLN | D | 308 | 134.482 | 130.271 | -68.417 | 1.00121.93 | D | C |
| ATOM | 6733 | OE1 | GLN | D | 308 | 134.666 | 129.302 | -67.682 | 1.00121.93 | D | O |
| ATOM | 6734 | NE2 | GLN | D | 308 | 135.480 | 131.006 | -68.894 | 1.00121.93 | D | N |
| ATOM | 6735 | C   | GLN | D | 308 | 131.940 | 127.769 | -71.134 | 1.00121.93 | D | C |
| ATOM | 6736 | O   | GLN | D | 308 | 131.696 | 126.808 | -70.405 | 1.00121.93 | D | O |
| ATOM | 6737 | N   | GLY | D | 309 | 131.449 | 127.889 | -72.364 | 1.00 30.52 | D | N |
| ATOM | 6738 | CA  | GLY | D | 309 | 130.581 | 126.879 | -72.941 | 1.00 30.52 | D | C |
| ATOM | 6739 | C   | GLY | D | 309 | 131.325 | 125.611 | -73.312 | 1.00 30.52 | D | C |
| ATOM | 6740 | O   | GLY | D | 309 | 130.844 | 124.505 | -73.068 | 1.00 30.52 | D | O |
| ATOM | 6741 | N   | LEU | D | 310 | 132.503 | 125.773 | -73.907 | 1.00101.35 | D | N |
| ATOM | 6742 | CA  | LEU | D | 310 | 133.319 | 124.635 | -74.311 | 1.00101.35 | D | C |
| ATOM | 6743 | CB  | LEU | D | 310 | 134.396 | 125.070 | -75.307 | 1.00101.35 | D | C |
| ATOM | 6744 | CG  | LEU | D | 310 | 133.896 | 125.660 | -76.627 | 1.00101.35 | D | C |
| ATOM | 6745 | CD1 | LEU | D | 310 | 135.066 | 126.101 | -77.493 | 1.00101.35 | D | C |
| ATOM | 6746 | CD2 | LEU | D | 310 | 133.024 | 124.657 | -77.367 | 1.00101.35 | D | C |
| ATOM | 6747 | C   | LEU | D | 310 | 133.963 | 123.960 | -73.105 | 1.00101.35 | D | C |
| ATOM | 6748 | O   | LEU | D | 310 | 134.314 | 122.782 | -73.156 | 1.00101.35 | D | O |
| ATOM | 6749 | N   | ARG | D | 311 | 134.119 | 124.715 | -72.023 | 1.00108.34 | D | N |
| ATOM | 6750 | CA  | ARG | D | 311 | 134.691 | 124.178 | -70.795 | 1.00108.34 | D | C |
| ATOM | 6751 | CB  | ARG | D | 311 | 135.022 | 125.305 | -69.815 | 1.00108.34 | D | C |
| ATOM | 6752 | CG  | ARG | D | 311 | 136.112 | 126.249 | -70.295 | 1.00108.34 | D | C |
| ATOM | 6753 | CD  | ARG | D | 311 | 136.423 | 127.303 | -69.246 | 1.00108.34 | D | C |
| ATOM | 6754 | NE  | ARG | D | 311 | 136.805 | 126.704 | -67.970 | 1.00108.34 | D | N |
| ATOM | 6755 | CZ  | ARG | D | 311 | 138.058 | 126.438 | -67.615 | 1.00108.34 | D | C |
| ATOM | 6756 | NH1 | ARG | D | 311 | 139.057 | 126.720 | -68.439 | 1.00108.34 | D | N |
| ATOM | 6757 | NH2 | ARG | D | 311 | 138.312 | 125.891 | -66.434 | 1.00108.34 | D | N |
| ATOM | 6758 | C   | ARG | D | 311 | 133.743 | 123.177 | -70.145 | 1.00108.34 | D | C |
| ATOM | 6759 | O   | ARG | D | 311 | 134.157 | 122.093 | -69.732 | 1.00108.34 | D | O |
| ATOM | 6760 | N   | ILE | D | 312 | 132.469 | 123.547 | -70.057 | 1.00 41.79 | D | N |
| ATOM | 6761 | CA  | ILE | D | 312 | 131.459 | 122.676 | -69.467 | 1.00 41.79 | D | C |
| ATOM | 6762 | CB  | ILE | D | 312 | 130.131 | 123.421 | -69.241 | 1.00 41.79 | D | C |
| ATOM | 6763 | CG2 | ILE | D | 312 | 129.100 | 122.494 | -68.615 | 1.00 41.79 | D | C |
| ATOM | 6764 | CG1 | ILE | D | 312 | 130.352 | 124.653 | -68.361 | 1.00 41.79 | D | C |
| ATOM | 6765 | CD1 | ILE | D | 312 | 129.094 | 125.449 | -68.098 | 1.00 41.79 | D | C |
| ATOM | 6766 | C   | ILE | D | 312 | 131.208 | 121.460 | -70.351 | 1.00 41.79 | D | C |
| ATOM | 6767 | O   | ILE | D | 312 | 131.136 | 120.332 | -69.864 | 1.00 41.79 | D | O |
| ATOM | 6768 | N   | LEU | D | 313 | 131.075 | 121.698 | -71.651 | 1.00 49.07 | D | N |
| ATOM | 6769 | CA  | LEU | D | 313 | 130.849 | 120.623 | -72.610 | 1.00 49.07 | D | C |

|      |      |     |     |   |     |         |         |         |      |        |   |   |
|------|------|-----|-----|---|-----|---------|---------|---------|------|--------|---|---|
| ATOM | 6770 | CB  | LEU | D | 313 | 130.598 | 121.196 | -74.006 | 1.00 | 49.07  | D | C |
| ATOM | 6771 | CG  | LEU | D | 313 | 130.335 | 120.183 | -75.122 | 1.00 | 49.07  | D | C |
| ATOM | 6772 | CD1 | LEU | D | 313 | 129.142 | 119.305 | -74.780 | 1.00 | 49.07  | D | C |
| ATOM | 6773 | CD2 | LEU | D | 313 | 130.120 | 120.890 | -76.452 | 1.00 | 49.07  | D | C |
| ATOM | 6774 | C   | LEU | D | 313 | 132.031 | 119.661 | -72.643 | 1.00 | 49.07  | D | C |
| ATOM | 6775 | O   | LEU | D | 313 | 131.859 | 118.456 | -72.829 | 1.00 | 49.07  | D | O |
| ATOM | 6776 | N   | GLY | D | 314 | 133.232 | 120.201 | -72.462 | 1.00 | 27.86  | D | N |
| ATOM | 6777 | CA  | GLY | D | 314 | 134.439 | 119.395 | -72.461 | 1.00 | 27.86  | D | C |
| ATOM | 6778 | C   | GLY | D | 314 | 134.512 | 118.468 | -71.264 | 1.00 | 27.86  | D | C |
| ATOM | 6779 | O   | GLY | D | 314 | 134.883 | 117.301 | -71.392 | 1.00 | 27.86  | D | O |
| ATOM | 6780 | N   | TYR | D | 315 | 134.153 | 118.989 | -70.095 | 1.00 | 99.30  | D | N |
| ATOM | 6781 | CA  | TYR | D | 315 | 134.167 | 118.202 | -68.868 | 1.00 | 99.30  | D | C |
| ATOM | 6782 | CB  | TYR | D | 315 | 134.067 | 119.113 | -67.644 | 1.00 | 99.30  | D | C |
| ATOM | 6783 | CG  | TYR | D | 315 | 135.222 | 120.078 | -67.505 | 1.00 | 99.30  | D | C |
| ATOM | 6784 | CD1 | TYR | D | 315 | 135.094 | 121.244 | -66.763 | 1.00 | 99.30  | D | C |
| ATOM | 6785 | CD2 | TYR | D | 315 | 136.443 | 119.821 | -68.115 | 1.00 | 99.30  | D | C |
| ATOM | 6786 | CE1 | TYR | D | 315 | 136.148 | 122.129 | -66.633 | 1.00 | 99.30  | D | C |
| ATOM | 6787 | CE2 | TYR | D | 315 | 137.502 | 120.699 | -67.991 | 1.00 | 99.30  | D | C |
| ATOM | 6788 | CZ  | TYR | D | 315 | 137.349 | 121.851 | -67.250 | 1.00 | 99.30  | D | C |
| ATOM | 6789 | OH  | TYR | D | 315 | 138.402 | 122.727 | -67.124 | 1.00 | 99.30  | D | O |
| ATOM | 6790 | C   | TYR | D | 315 | 133.034 | 117.182 | -68.857 | 1.00 | 99.30  | D | C |
| ATOM | 6791 | O   | TYR | D | 315 | 133.141 | 116.128 | -68.230 | 1.00 | 99.30  | D | O |
| ATOM | 6792 | N   | THR | D | 316 | 131.949 | 117.502 | -69.554 | 1.00 | 115.27 | D | N |
| ATOM | 6793 | CA  | THR | D | 316 | 130.802 | 116.606 | -69.638 | 1.00 | 115.27 | D | C |
| ATOM | 6794 | CB  | THR | D | 316 | 129.574 | 117.312 | -70.243 | 1.00 | 115.27 | D | C |
| ATOM | 6795 | OG1 | THR | D | 316 | 129.196 | 118.416 | -69.410 | 1.00 | 115.27 | D | O |
| ATOM | 6796 | CG2 | THR | D | 316 | 128.405 | 116.345 | -70.354 | 1.00 | 115.27 | D | C |
| ATOM | 6797 | C   | THR | D | 316 | 131.134 | 115.374 | -70.473 | 1.00 | 115.27 | D | C |
| ATOM | 6798 | O   | THR | D | 316 | 130.860 | 114.246 | -70.066 | 1.00 | 115.27 | D | O |
| ATOM | 6799 | N   | LEU | D | 317 | 131.726 | 115.598 | -71.642 | 1.00 | 53.09  | D | N |
| ATOM | 6800 | CA  | LEU | D | 317 | 132.109 | 114.505 | -72.528 | 1.00 | 53.09  | D | C |
| ATOM | 6801 | CB  | LEU | D | 317 | 132.503 | 115.042 | -73.905 | 1.00 | 53.09  | D | C |
| ATOM | 6802 | CG  | LEU | D | 317 | 131.418 | 115.795 | -74.679 | 1.00 | 53.09  | D | C |
| ATOM | 6803 | CD1 | LEU | D | 317 | 131.966 | 116.327 | -75.995 | 1.00 | 53.09  | D | C |
| ATOM | 6804 | CD2 | LEU | D | 317 | 130.211 | 114.901 | -74.920 | 1.00 | 53.09  | D | C |
| ATOM | 6805 | C   | LEU | D | 317 | 133.253 | 113.692 | -71.932 | 1.00 | 53.09  | D | C |
| ATOM | 6806 | O   | LEU | D | 317 | 133.408 | 112.507 | -72.230 | 1.00 | 53.09  | D | O |
| ATOM | 6807 | N   | LYS | D | 318 | 134.053 | 114.336 | -71.088 | 1.00 | 75.11  | D | N |
| ATOM | 6808 | CA  | LYS | D | 318 | 135.168 | 113.667 | -70.428 | 1.00 | 75.11  | D | C |
| ATOM | 6809 | CB  | LYS | D | 318 | 136.133 | 114.691 | -69.831 | 1.00 | 75.11  | D | C |
| ATOM | 6810 | CG  | LYS | D | 318 | 137.328 | 114.075 | -69.121 | 1.00 | 75.11  | D | C |
| ATOM | 6811 | CD  | LYS | D | 318 | 138.235 | 115.145 | -68.538 | 1.00 | 75.11  | D | C |
| ATOM | 6812 | CE  | LYS | D | 318 | 138.768 | 116.067 | -69.622 | 1.00 | 75.11  | D | C |
| ATOM | 6813 | NZ  | LYS | D | 318 | 139.653 | 117.125 | -69.061 | 1.00 | 75.11  | D | N |
| ATOM | 6814 | C   | LYS | D | 318 | 134.668 | 112.722 | -69.340 | 1.00 | 75.11  | D | C |
| ATOM | 6815 | O   | LYS | D | 318 | 135.081 | 111.565 | -69.272 | 1.00 | 75.11  | D | O |
| ATOM | 6816 | N   | SER | D | 319 | 133.777 | 113.225 | -68.492 | 1.00 | 82.79  | D | N |
| ATOM | 6817 | CA  | SER | D | 319 | 133.201 | 112.420 | -67.421 | 1.00 | 82.79  | D | C |
| ATOM | 6818 | CB  | SER | D | 319 | 132.429 | 113.306 | -66.441 | 1.00 | 82.79  | D | C |
| ATOM | 6819 | OG  | SER | D | 319 | 131.842 | 112.532 | -65.409 | 1.00 | 82.79  | D | O |
| ATOM | 6820 | C   | SER | D | 319 | 132.284 | 111.340 | -67.984 | 1.00 | 82.79  | D | C |
| ATOM | 6821 | O   | SER | D | 319 | 132.079 | 110.298 | -67.360 | 1.00 | 82.79  | D | O |
| ATOM | 6822 | N   | CYS | D | 320 | 131.736 | 111.596 | -69.167 | 1.00 | 91.34  | D | N |
| ATOM | 6823 | CA  | CYS | D | 320 | 130.848 | 110.644 | -69.824 | 1.00 | 91.34  | D | C |
| ATOM | 6824 | CB  | CYS | D | 320 | 129.607 | 111.354 | -70.368 | 1.00 | 91.34  | D | C |
| ATOM | 6825 | SG  | CYS | D | 320 | 128.608 | 112.183 | -69.110 | 1.00 | 91.34  | D | S |
| ATOM | 6826 | C   | CYS | D | 320 | 131.568 | 109.912 | -70.951 | 1.00 | 91.34  | D | C |
| ATOM | 6827 | O   | CYS | D | 320 | 130.955 | 109.533 | -71.948 | 1.00 | 91.34  | D | O |
| ATOM | 6828 | N   | ALA | D | 321 | 132.873 | 109.721 | -70.786 | 1.00 | 55.04  | D | N |
| ATOM | 6829 | CA  | ALA | D | 321 | 133.676 | 109.017 | -71.778 | 1.00 | 55.04  | D | C |
| ATOM | 6830 | CB  | ALA | D | 321 | 135.144 | 109.035 | -71.382 | 1.00 | 55.04  | D | C |
| ATOM | 6831 | C   | ALA | D | 321 | 133.186 | 107.584 | -71.951 | 1.00 | 55.04  | D | C |
| ATOM | 6832 | O   | ALA | D | 321 | 133.259 | 107.019 | -73.042 | 1.00 | 55.04  | D | O |
| ATOM | 6833 | N   | SER | D | 322 | 132.687 | 107.002 | -70.865 | 1.00 | 39.37  | D | N |
| ATOM | 6834 | CA  | SER | D | 322 | 132.151 | 105.648 | -70.899 | 1.00 | 39.37  | D | C |
| ATOM | 6835 | CB  | SER | D | 322 | 132.257 | 104.995 | -69.520 | 1.00 | 39.37  | D | C |
| ATOM | 6836 | OG  | SER | D | 322 | 133.605 | 104.924 | -69.091 | 1.00 | 39.37  | D | O |
| ATOM | 6837 | C   | SER | D | 322 | 130.700 | 105.653 | -71.368 | 1.00 | 39.37  | D | C |



|      |      |     |     |   |     |         |         |         |      |        |   |   |
|------|------|-----|-----|---|-----|---------|---------|---------|------|--------|---|---|
| ATOM | 6838 | O   | SER | D | 322 | 130.279 | 104.776 | -72.122 | 1.00 | 39.37  | D | O |
| ATOM | 6839 | N   | GLU | D | 323 | 129.942 | 106.647 | -70.917 | 1.00 | 101.99 | D | N |
| ATOM | 6840 | CA  | GLU | D | 323 | 128.542 | 106.780 | -71.303 | 1.00 | 101.99 | D | C |
| ATOM | 6841 | CB  | GLU | D | 323 | 127.906 | 107.985 | -70.607 | 1.00 | 101.99 | D | C |
| ATOM | 6842 | CG  | GLU | D | 323 | 127.958 | 107.930 | -69.089 | 1.00 | 101.99 | D | C |
| ATOM | 6843 | CD  | GLU | D | 323 | 127.124 | 106.801 | -68.513 | 1.00 | 101.99 | D | C |
| ATOM | 6844 | OE1 | GLU | D | 323 | 126.353 | 106.178 | -69.273 | 1.00 | 101.99 | D | O |
| ATOM | 6845 | OE2 | GLU | D | 323 | 127.239 | 106.538 | -67.298 | 1.00 | 101.99 | D | O |
| ATOM | 6846 | C   | GLU | D | 323 | 128.405 | 106.918 | -72.814 | 1.00 | 101.99 | D | C |
| ATOM | 6847 | O   | GLU | D | 323 | 127.540 | 106.295 | -73.430 | 1.00 | 101.99 | D | O |
| ATOM | 6848 | N   | LEU | D | 324 | 129.266 | 107.739 | -73.406 | 1.00 | 51.45  | D | N |
| ATOM | 6849 | CA  | LEU | D | 324 | 129.266 | 107.941 | -74.849 | 1.00 | 51.45  | D | C |
| ATOM | 6850 | CB  | LEU | D | 324 | 130.176 | 109.112 | -75.226 | 1.00 | 51.45  | D | C |
| ATOM | 6851 | CG  | LEU | D | 324 | 130.240 | 109.481 | -76.709 | 1.00 | 51.45  | D | C |
| ATOM | 6852 | CD1 | LEU | D | 324 | 128.858 | 109.837 | -77.234 | 1.00 | 51.45  | D | C |
| ATOM | 6853 | CD2 | LEU | D | 324 | 131.214 | 110.627 | -76.937 | 1.00 | 51.45  | D | C |
| ATOM | 6854 | C   | LEU | D | 324 | 129.716 | 106.674 | -75.568 | 1.00 | 51.45  | D | C |
| ATOM | 6855 | O   | LEU | D | 324 | 129.342 | 106.433 | -76.715 | 1.00 | 51.45  | D | O |
| ATOM | 6856 | N   | GLY | D | 325 | 130.520 | 105.868 | -74.882 | 1.00 | 21.45  | D | N |
| ATOM | 6857 | CA  | GLY | D | 325 | 131.014 | 104.624 | -75.443 | 1.00 | 21.45  | D | C |
| ATOM | 6858 | C   | GLY | D | 325 | 129.900 | 103.639 | -75.737 | 1.00 | 21.45  | D | C |
| ATOM | 6859 | O   | GLY | D | 325 | 129.865 | 103.031 | -76.807 | 1.00 | 21.45  | D | O |
| ATOM | 6860 | N   | PHE | D | 326 | 128.987 | 103.481 | -74.784 | 1.00 | 93.89  | D | N |
| ATOM | 6861 | CA  | PHE | D | 326 | 127.858 | 102.572 | -74.949 | 1.00 | 93.89  | D | C |
| ATOM | 6862 | CB  | PHE | D | 326 | 127.168 | 102.318 | -73.606 | 1.00 | 93.89  | D | C |
| ATOM | 6863 | CG  | PHE | D | 326 | 128.002 | 101.532 | -72.633 | 1.00 | 93.89  | D | C |
| ATOM | 6864 | CD1 | PHE | D | 326 | 128.814 | 102.177 | -71.715 | 1.00 | 93.89  | D | C |
| ATOM | 6865 | CD2 | PHE | D | 326 | 127.971 | 100.148 | -72.635 | 1.00 | 93.89  | D | C |
| ATOM | 6866 | CE1 | PHE | D | 326 | 129.581 | 101.457 | -70.820 | 1.00 | 93.89  | D | C |
| ATOM | 6867 | CE2 | PHE | D | 326 | 128.736 | 99.422  | -71.742 | 1.00 | 93.89  | D | C |
| ATOM | 6868 | CZ  | PHE | D | 326 | 129.542 | 100.077 | -70.833 | 1.00 | 93.89  | D | C |
| ATOM | 6869 | C   | PHE | D | 326 | 126.854 | 103.111 | -75.962 | 1.00 | 93.89  | D | C |
| ATOM | 6870 | O   | PHE | D | 326 | 126.067 | 102.354 | -76.531 | 1.00 | 93.89  | D | O |
| ATOM | 6871 | N   | LEU | D | 327 | 126.883 | 104.421 | -76.183 | 1.00 | 47.15  | D | N |
| ATOM | 6872 | CA  | LEU | D | 327 | 125.991 | 105.054 | -77.147 | 1.00 | 47.15  | D | C |
| ATOM | 6873 | CB  | LEU | D | 327 | 126.069 | 106.578 | -77.034 | 1.00 | 47.15  | D | C |
| ATOM | 6874 | CG  | LEU | D | 327 | 125.248 | 107.377 | -78.049 | 1.00 | 47.15  | D | C |
| ATOM | 6875 | CD1 | LEU | D | 327 | 123.787 | 106.954 | -78.023 | 1.00 | 47.15  | D | C |
| ATOM | 6876 | CD2 | LEU | D | 327 | 125.381 | 108.869 | -77.789 | 1.00 | 47.15  | D | C |
| ATOM | 6877 | C   | LEU | D | 327 | 126.324 | 104.614 | -78.568 | 1.00 | 47.15  | D | C |
| ATOM | 6878 | O   | LEU | D | 327 | 125.433 | 104.277 | -79.348 | 1.00 | 47.15  | D | O |
| ATOM | 6879 | N   | LEU | D | 328 | 127.611 | 104.620 | -78.897 | 1.00 | 87.13  | D | N |
| ATOM | 6880 | CA  | LEU | D | 328 | 128.065 | 104.184 | -80.212 | 1.00 | 87.13  | D | C |
| ATOM | 6881 | CB  | LEU | D | 328 | 129.434 | 104.785 | -80.542 | 1.00 | 87.13  | D | C |
| ATOM | 6882 | CG  | LEU | D | 328 | 129.493 | 106.266 | -80.932 | 1.00 | 87.13  | D | C |
| ATOM | 6883 | CD1 | LEU | D | 328 | 128.976 | 107.161 | -79.815 | 1.00 | 87.13  | D | C |
| ATOM | 6884 | CD2 | LEU | D | 328 | 130.913 | 106.655 | -81.314 | 1.00 | 87.13  | D | C |
| ATOM | 6885 | C   | LEU | D | 328 | 128.127 | 102.663 | -80.280 | 1.00 | 87.13  | D | C |
| ATOM | 6886 | O   | LEU | D | 328 | 128.034 | 102.074 | -81.357 | 1.00 | 87.13  | D | O |
| ATOM | 6887 | N   | PHE | D | 329 | 128.285 | 102.031 | -79.121 | 1.00 | 48.49  | D | N |
| ATOM | 6888 | CA  | PHE | D | 329 | 128.338 | 100.577 | -79.045 | 1.00 | 48.49  | D | C |
| ATOM | 6889 | CB  | PHE | D | 329 | 128.796 | 100.126 | -77.657 | 1.00 | 48.49  | D | C |
| ATOM | 6890 | CG  | PHE | D | 329 | 128.858 | 98.634  | -77.495 | 1.00 | 48.49  | D | C |
| ATOM | 6891 | CD1 | PHE | D | 329 | 129.997 | 97.930  | -77.853 | 1.00 | 48.49  | D | C |
| ATOM | 6892 | CD2 | PHE | D | 329 | 127.777 | 97.935  | -76.985 | 1.00 | 48.49  | D | C |
| ATOM | 6893 | CE1 | PHE | D | 329 | 130.056 | 96.557  | -77.706 | 1.00 | 48.49  | D | C |
| ATOM | 6894 | CE2 | PHE | D | 329 | 127.831 | 96.563  | -76.836 | 1.00 | 48.49  | D | C |
| ATOM | 6895 | CZ  | PHE | D | 329 | 128.972 | 95.873  | -77.197 | 1.00 | 48.49  | D | C |
| ATOM | 6896 | C   | PHE | D | 329 | 126.981 | 99.967  | -79.376 | 1.00 | 48.49  | D | C |
| ATOM | 6897 | O   | PHE | D | 329 | 126.848 | 99.216  | -80.342 | 1.00 | 48.49  | D | O |
| ATOM | 6898 | N   | SER | D | 330 | 125.978 | 100.295 | -78.568 | 1.00 | 71.43  | D | N |
| ATOM | 6899 | CA  | SER | D | 330 | 124.623 | 99.801  | -78.786 | 1.00 | 71.43  | D | C |
| ATOM | 6900 | CB  | SER | D | 330 | 123.683 | 100.321 | -77.697 | 1.00 | 71.43  | D | C |
| ATOM | 6901 | OG  | SER | D | 330 | 123.667 | 101.738 | -77.672 | 1.00 | 71.43  | D | O |
| ATOM | 6902 | C   | SER | D | 330 | 124.107 | 100.207 | -80.163 | 1.00 | 71.43  | D | C |
| ATOM | 6903 | O   | SER | D | 330 | 123.232 | 99.550  | -80.726 | 1.00 | 71.43  | D | O |
| ATOM | 6904 | N   | LEU | D | 331 | 124.655 | 101.293 | -80.697 | 1.00 | 53.19  | D | N |
| ATOM | 6905 | CA  | LEU | D | 331 | 124.289 | 101.762 | -82.028 | 1.00 | 53.19  | D | C |

|      |      |     |     |   |     |         |         |         |      |        |   |   |
|------|------|-----|-----|---|-----|---------|---------|---------|------|--------|---|---|
| ATOM | 6906 | CB  | LEU | D | 331 | 124.824 | 103.175 | -82.265 | 1.00 | 53.19  | D | C |
| ATOM | 6907 | CG  | LEU | D | 331 | 124.585 | 103.769 | -83.655 | 1.00 | 53.19  | D | C |
| ATOM | 6908 | CD1 | LEU | D | 331 | 123.097 | 103.883 | -83.946 | 1.00 | 53.19  | D | C |
| ATOM | 6909 | CD2 | LEU | D | 331 | 125.264 | 105.123 | -83.785 | 1.00 | 53.19  | D | C |
| ATOM | 6910 | C   | LEU | D | 331 | 124.823 | 100.817 | -83.097 | 1.00 | 53.19  | D | C |
| ATOM | 6911 | O   | LEU | D | 331 | 124.057 | 100.250 | -83.876 | 1.00 | 53.19  | D | O |
| ATOM | 6912 | N   | THR | D | 332 | 126.142 | 100.651 | -83.124 | 1.00 | 103.02 | D | N |
| ATOM | 6913 | CA  | THR | D | 332 | 126.794 | 99.787  | -84.103 | 1.00 | 103.02 | D | C |
| ATOM | 6914 | CB  | THR | D | 332 | 128.309 | 99.682  | -83.839 | 1.00 | 103.02 | D | C |
| ATOM | 6915 | OG1 | THR | D | 332 | 128.894 | 100.990 | -83.869 | 1.00 | 103.02 | D | O |
| ATOM | 6916 | CG2 | THR | D | 332 | 128.976 | 98.809  | -84.892 | 1.00 | 103.02 | D | C |
| ATOM | 6917 | C   | THR | D | 332 | 126.186 | 98.388  | -84.108 | 1.00 | 103.02 | D | C |
| ATOM | 6918 | O   | THR | D | 332 | 126.015 | 97.780  | -85.165 | 1.00 | 103.02 | D | O |
| ATOM | 6919 | N   | MET | D | 333 | 125.861 | 97.884  | -82.922 | 1.00 | 112.73 | D | N |
| ATOM | 6920 | CA  | MET | D | 333 | 125.243 | 96.569  | -82.794 | 1.00 | 112.73 | D | C |
| ATOM | 6921 | CB  | MET | D | 333 | 124.960 | 96.249  | -81.326 | 1.00 | 112.73 | D | C |
| ATOM | 6922 | CG  | MET | D | 333 | 126.205 | 96.151  | -80.460 | 1.00 | 112.73 | D | C |
| ATOM | 6923 | SD  | MET | D | 333 | 127.343 | 94.874  | -81.027 | 1.00 | 112.73 | D | S |
| ATOM | 6924 | CE  | MET | D | 333 | 126.301 | 93.421  | -80.924 | 1.00 | 112.73 | D | C |
| ATOM | 6925 | C   | MET | D | 333 | 123.953 | 96.494  | -83.604 | 1.00 | 112.73 | D | C |
| ATOM | 6926 | O   | MET | D | 333 | 123.778 | 95.598  | -84.428 | 1.00 | 112.73 | D | O |
| ATOM | 6927 | N   | ALA | D | 334 | 123.055 | 97.444  | -83.365 | 1.00 | 30.08  | D | N |
| ATOM | 6928 | CA  | ALA | D | 334 | 121.778 | 97.486  | -84.067 | 1.00 | 30.08  | D | C |
| ATOM | 6929 | CB  | ALA | D | 334 | 120.881 | 98.559  | -83.469 | 1.00 | 30.08  | D | C |
| ATOM | 6930 | C   | ALA | D | 334 | 121.969 | 97.721  | -85.562 | 1.00 | 30.08  | D | C |
| ATOM | 6931 | O   | ALA | D | 334 | 121.182 | 97.244  | -86.379 | 1.00 | 30.08  | D | O |
| ATOM | 6932 | N   | ILE | D | 335 | 123.019 | 98.456  | -85.914 | 1.00 | 41.45  | D | N |
| ATOM | 6933 | CA  | ILE | D | 335 | 123.308 | 98.760  | -87.312 | 1.00 | 41.45  | D | C |
| ATOM | 6934 | CB  | ILE | D | 335 | 124.601 | 99.587  | -87.460 | 1.00 | 41.45  | D | C |
| ATOM | 6935 | CG2 | ILE | D | 335 | 124.967 | 99.744  | -88.928 | 1.00 | 41.45  | D | C |
| ATOM | 6936 | CG1 | ILE | D | 335 | 124.434 | 100.959 | -86.805 | 1.00 | 41.45  | D | C |
| ATOM | 6937 | CD1 | ILE | D | 335 | 125.662 | 101.837 | -86.902 | 1.00 | 41.45  | D | C |
| ATOM | 6938 | C   | ILE | D | 335 | 123.427 | 97.493  | -88.153 | 1.00 | 41.45  | D | C |
| ATOM | 6939 | O   | ILE | D | 335 | 122.699 | 97.315  | -89.128 | 1.00 | 41.45  | D | O |
| ATOM | 6940 | N   | ILE | D | 336 | 124.347 | 96.615  | -87.767 | 1.00 | 44.55  | D | N |
| ATOM | 6941 | CA  | ILE | D | 336 | 124.582 | 95.378  | -88.502 | 1.00 | 44.55  | D | C |
| ATOM | 6942 | CB  | ILE | D | 336 | 125.774 | 94.596  | -87.917 | 1.00 | 44.55  | D | C |
| ATOM | 6943 | CG2 | ILE | D | 336 | 126.096 | 93.386  | -88.782 | 1.00 | 44.55  | D | C |
| ATOM | 6944 | CG1 | ILE | D | 336 | 126.995 | 95.509  | -87.782 | 1.00 | 44.55  | D | C |
| ATOM | 6945 | CD1 | ILE | D | 336 | 128.209 | 94.827  | -87.191 | 1.00 | 44.55  | D | C |
| ATOM | 6946 | C   | ILE | D | 336 | 123.344 | 94.484  | -88.506 | 1.00 | 44.55  | D | C |
| ATOM | 6947 | O   | ILE | D | 336 | 123.097 | 93.756  | -89.468 | 1.00 | 44.55  | D | O |
| ATOM | 6948 | N   | ILE | D | 337 | 122.567 | 94.548  | -87.430 | 1.00 | 87.94  | D | N |
| ATOM | 6949 | CA  | ILE | D | 337 | 121.366 | 93.730  | -87.300 | 1.00 | 87.94  | D | C |
| ATOM | 6950 | CB  | ILE | D | 337 | 120.721 | 93.889  | -85.910 | 1.00 | 87.94  | D | C |
| ATOM | 6951 | CG2 | ILE | D | 337 | 119.422 | 93.102  | -85.832 | 1.00 | 87.94  | D | C |
| ATOM | 6952 | CG1 | ILE | D | 337 | 121.690 | 93.434  | -84.818 | 1.00 | 87.94  | D | C |
| ATOM | 6953 | CD1 | ILE | D | 337 | 121.157 | 93.621  | -83.415 | 1.00 | 87.94  | D | C |
| ATOM | 6954 | C   | ILE | D | 337 | 120.328 | 94.062  | -88.368 | 1.00 | 87.94  | D | C |
| ATOM | 6955 | O   | ILE | D | 337 | 119.855 | 93.178  | -89.082 | 1.00 | 87.94  | D | O |
| ATOM | 6956 | N   | PHE | D | 338 | 119.976 | 95.339  | -88.472 | 1.00 | 61.40  | D | N |
| ATOM | 6957 | CA  | PHE | D | 338 | 118.956 | 95.777  | -89.419 | 1.00 | 61.40  | D | C |
| ATOM | 6958 | CB  | PHE | D | 338 | 118.351 | 97.113  | -88.983 | 1.00 | 61.40  | D | C |
| ATOM | 6959 | CG  | PHE | D | 338 | 117.606 | 97.045  | -87.680 | 1.00 | 61.40  | D | C |
| ATOM | 6960 | CD1 | PHE | D | 338 | 116.290 | 96.615  | -87.642 | 1.00 | 61.40  | D | C |
| ATOM | 6961 | CD2 | PHE | D | 338 | 118.219 | 97.414  | -86.495 | 1.00 | 61.40  | D | C |
| ATOM | 6962 | CE1 | PHE | D | 338 | 115.601 | 96.552  | -86.445 | 1.00 | 61.40  | D | C |
| ATOM | 6963 | CE2 | PHE | D | 338 | 117.536 | 97.353  | -85.295 | 1.00 | 61.40  | D | C |
| ATOM | 6964 | CZ  | PHE | D | 338 | 116.225 | 96.922  | -85.271 | 1.00 | 61.40  | D | C |
| ATOM | 6965 | C   | PHE | D | 338 | 119.495 | 95.883  | -90.843 | 1.00 | 61.40  | D | C |
| ATOM | 6966 | O   | PHE | D | 338 | 118.783 | 95.595  | -91.805 | 1.00 | 61.40  | D | O |
| ATOM | 6967 | N   | ALA | D | 339 | 120.752 | 96.296  | -90.973 | 1.00 | 38.36  | D | N |
| ATOM | 6968 | CA  | ALA | D | 339 | 121.370 | 96.460  | -92.285 | 1.00 | 38.36  | D | C |
| ATOM | 6969 | CB  | ALA | D | 339 | 122.802 | 96.953  | -92.142 | 1.00 | 38.36  | D | C |
| ATOM | 6970 | C   | ALA | D | 339 | 121.330 | 95.166  | -93.091 | 1.00 | 38.36  | D | C |
| ATOM | 6971 | O   | ALA | D | 339 | 121.335 | 95.191  | -94.322 | 1.00 | 38.36  | D | O |
| ATOM | 6972 | N   | THR | D | 340 | 121.288 | 94.037  | -92.392 | 1.00 | 117.99 | D | N |
| ATOM | 6973 | CA  | THR | D | 340 | 121.253 | 92.734  | -93.047 | 1.00 | 117.99 | D | C |

|      |      |     |     |   |     |         |        |          |      |        |   |   |
|------|------|-----|-----|---|-----|---------|--------|----------|------|--------|---|---|
| ATOM | 6974 | CB  | THR | D | 340 | 121.930 | 91.647 | -92.187  | 1.00 | 117.99 | D | C |
| ATOM | 6975 | OG1 | THR | D | 340 | 121.309 | 91.597 | -90.897  | 1.00 | 117.99 | D | O |
| ATOM | 6976 | CG2 | THR | D | 340 | 123.412 | 91.947 | -92.019  | 1.00 | 117.99 | D | C |
| ATOM | 6977 | C   | THR | D | 340 | 119.828 | 92.302 | -93.380  | 1.00 | 117.99 | D | C |
| ATOM | 6978 | O   | THR | D | 340 | 119.512 | 92.021 | -94.536  | 1.00 | 117.99 | D | O |
| ATOM | 6979 | N   | VAL | D | 341 | 118.969 | 92.255 | -92.366  | 1.00 | 49.53  | D | N |
| ATOM | 6980 | CA  | VAL | D | 341 | 117.589 | 91.814 | -92.551  | 1.00 | 49.53  | D | C |
| ATOM | 6981 | CB  | VAL | D | 341 | 116.796 | 91.857 | -91.229  | 1.00 | 49.53  | D | C |
| ATOM | 6982 | CG1 | VAL | D | 341 | 117.405 | 90.904 | -90.213  | 1.00 | 49.53  | D | C |
| ATOM | 6983 | CG2 | VAL | D | 341 | 116.752 | 93.274 | -90.679  | 1.00 | 49.53  | D | C |
| ATOM | 6984 | C   | VAL | D | 341 | 116.858 | 92.642 | -93.606  | 1.00 | 49.53  | D | C |
| ATOM | 6985 | O   | VAL | D | 341 | 115.954 | 92.147 | -94.278  | 1.00 | 49.53  | D | O |
| ATOM | 6986 | N   | MET | D | 342 | 117.255 | 93.903 | -93.746  | 1.00 | 112.56 | D | N |
| ATOM | 6987 | CA  | MET | D | 342 | 116.646 | 94.790 | -94.730  | 1.00 | 112.56 | D | C |
| ATOM | 6988 | CB  | MET | D | 342 | 116.781 | 96.252 | -94.296  | 1.00 | 112.56 | D | C |
| ATOM | 6989 | CG  | MET | D | 342 | 116.068 | 96.584 | -92.996  | 1.00 | 112.56 | D | C |
| ATOM | 6990 | SD  | MET | D | 342 | 116.163 | 98.335 | -92.576  | 1.00 | 112.56 | D | S |
| ATOM | 6991 | CE  | MET | D | 342 | 117.936 | 98.568 | -92.481  | 1.00 | 112.56 | D | C |
| ATOM | 6992 | C   | MET | D | 342 | 117.270 | 94.594 | -96.107  | 1.00 | 112.56 | D | C |
| ATOM | 6993 | O   | MET | D | 342 | 116.651 | 94.893 | -97.128  | 1.00 | 112.56 | D | O |
| ATOM | 6994 | N   | PHE | D | 343 | 118.500 | 94.091 | -96.128  | 1.00 | 78.09  | D | N |
| ATOM | 6995 | CA  | PHE | D | 343 | 119.209 | 93.857 | -97.380  | 1.00 | 78.09  | D | C |
| ATOM | 6996 | CB  | PHE | D | 343 | 120.718 | 93.789 | -97.143  | 1.00 | 78.09  | D | C |
| ATOM | 6997 | CG  | PHE | D | 343 | 121.514 | 93.513 | -98.386  | 1.00 | 78.09  | D | C |
| ATOM | 6998 | CD1 | PHE | D | 343 | 121.830 | 94.537 | -99.262  | 1.00 | 78.09  | D | C |
| ATOM | 6999 | CD2 | PHE | D | 343 | 121.945 | 92.230 | -98.679  | 1.00 | 78.09  | D | C |
| ATOM | 7000 | CE1 | PHE | D | 343 | 122.561 | 94.287 | -100.408 | 1.00 | 78.09  | D | C |
| ATOM | 7001 | CE2 | PHE | D | 343 | 122.676 | 91.974 | -99.823  | 1.00 | 78.09  | D | C |
| ATOM | 7002 | CZ  | PHE | D | 343 | 122.985 | 93.004 | -100.688 | 1.00 | 78.09  | D | C |
| ATOM | 7003 | C   | PHE | D | 343 | 118.729 | 92.583 | -98.066  | 1.00 | 78.09  | D | C |
| ATOM | 7004 | O   | PHE | D | 343 | 118.417 | 92.589 | -99.256  | 1.00 | 78.09  | D | O |
| ATOM | 7005 | N   | TYR | D | 344 | 118.674 | 91.491 | -97.310  | 1.00 | 66.10  | D | N |
| ATOM | 7006 | CA  | TYR | D | 344 | 118.234 | 90.209 | -97.851  | 1.00 | 66.10  | D | C |
| ATOM | 7007 | CB  | TYR | D | 344 | 118.515 | 89.078 | -96.858  | 1.00 | 66.10  | D | C |
| ATOM | 7008 | CG  | TYR | D | 344 | 119.979 | 88.905 | -96.521  | 1.00 | 66.10  | D | C |
| ATOM | 7009 | CD1 | TYR | D | 344 | 120.828 | 88.200 | -97.364  | 1.00 | 66.10  | D | C |
| ATOM | 7010 | CD2 | TYR | D | 344 | 120.511 | 89.441 | -95.356  | 1.00 | 66.10  | D | C |
| ATOM | 7011 | CE1 | TYR | D | 344 | 122.167 | 88.039 | -97.057  | 1.00 | 66.10  | D | C |
| ATOM | 7012 | CE2 | TYR | D | 344 | 121.847 | 89.285 | -95.041  | 1.00 | 66.10  | D | C |
| ATOM | 7013 | CZ  | TYR | D | 344 | 122.670 | 88.583 | -95.895  | 1.00 | 66.10  | D | C |
| ATOM | 7014 | OH  | TYR | D | 344 | 124.001 | 88.425 | -95.584  | 1.00 | 66.10  | D | O |
| ATOM | 7015 | C   | TYR | D | 344 | 116.752 | 90.239 | -98.210  | 1.00 | 66.10  | D | C |
| ATOM | 7016 | O   | TYR | D | 344 | 116.248 | 89.340 | -98.885  | 1.00 | 66.10  | D | O |
| ATOM | 7017 | N   | ALA | D | 345 | 116.058 | 91.278 | -97.755  | 1.00 | 55.12  | D | N |
| ATOM | 7018 | CA  | ALA | D | 345 | 114.639 | 91.440 | -98.045  | 1.00 | 55.12  | D | C |
| ATOM | 7019 | CB  | ALA | D | 345 | 113.937 | 92.129 | -96.885  | 1.00 | 55.12  | D | C |
| ATOM | 7020 | C   | ALA | D | 345 | 114.432 | 92.224 | -99.336  | 1.00 | 55.12  | D | C |
| ATOM | 7021 | O   | ALA | D | 345 | 113.368 | 92.157 | -99.952  | 1.00 | 55.12  | D | O |
| ATOM | 7022 | N   | GLU | D | 346 | 115.458 | 92.966 | -99.741  | 1.00 | 125.73 | D | N |
| ATOM | 7023 | CA  | GLU | D | 346 | 115.394 | 93.763 | -100.960 | 1.00 | 125.73 | D | C |
| ATOM | 7024 | CB  | GLU | D | 346 | 115.809 | 95.209 | -100.675 | 1.00 | 125.73 | D | C |
| ATOM | 7025 | CG  | GLU | D | 346 | 114.947 | 95.914 | -99.640  | 1.00 | 125.73 | D | C |
| ATOM | 7026 | CD  | GLU | D | 346 | 113.527 | 96.148 | -100.119 | 1.00 | 125.73 | D | C |
| ATOM | 7027 | OE1 | GLU | D | 346 | 113.266 | 95.969 | -101.327 | 1.00 | 125.73 | D | O |
| ATOM | 7028 | OE2 | GLU | D | 346 | 112.671 | 96.511 | -99.286  | 1.00 | 125.73 | D | O |
| ATOM | 7029 | C   | GLU | D | 346 | 116.278 | 93.172 | -102.053 | 1.00 | 125.73 | D | C |
| ATOM | 7030 | O   | GLU | D | 346 | 116.268 | 93.638 | -103.192 | 1.00 | 125.73 | D | O |
| ATOM | 7031 | N   | LYS | D | 347 | 117.042 | 92.144 | -101.699 | 1.00 | 138.31 | D | N |
| ATOM | 7032 | CA  | LYS | D | 347 | 117.947 | 91.498 | -102.642 | 1.00 | 138.31 | D | C |
| ATOM | 7033 | CB  | LYS | D | 347 | 118.851 | 90.497 | -101.918 | 1.00 | 138.31 | D | C |
| ATOM | 7034 | CG  | LYS | D | 347 | 119.870 | 89.814 | -102.817 | 1.00 | 138.31 | D | C |
| ATOM | 7035 | CD  | LYS | D | 347 | 120.729 | 88.835 | -102.034 | 1.00 | 138.31 | D | C |
| ATOM | 7036 | CE  | LYS | D | 347 | 121.749 | 88.154 | -102.933 | 1.00 | 138.31 | D | C |
| ATOM | 7037 | NZ  | LYS | D | 347 | 121.097 | 87.390 | -104.032 | 1.00 | 138.31 | D | N |
| ATOM | 7038 | C   | LYS | D | 347 | 117.178 | 90.799 | -103.759 | 1.00 | 138.31 | D | C |
| ATOM | 7039 | O   | LYS | D | 347 | 117.688 | 90.631 | -104.867 | 1.00 | 138.31 | D | O |
| ATOM | 7040 | N   | GLY | D | 348 | 115.947 | 90.396 | -103.461 | 1.00 | 56.79  | D | N |
| ATOM | 7041 | CA  | GLY | D | 348 | 115.110 | 89.717 | -104.434 | 1.00 | 56.79  | D | C |

|      |      |     |     |   |     |         |                 |      |        |   |   |
|------|------|-----|-----|---|-----|---------|-----------------|------|--------|---|---|
| ATOM | 7042 | C   | GLY | D | 348 | 114.395 | 90.680-105.362  | 1.00 | 56.79  | D | C |
| ATOM | 7043 | O   | GLY | D | 348 | 113.418 | 90.317-106.015  | 1.00 | 56.79  | D | O |
| ATOM | 7044 | N   | SER | D | 349 | 114.886 | 91.914-105.419  | 1.00 | 123.99 | D | N |
| ATOM | 7045 | CA  | SER | D | 349 | 114.292 | 92.937-106.271  | 1.00 | 123.99 | D | C |
| ATOM | 7046 | CB  | SER | D | 349 | 113.649 | 94.034-105.421  | 1.00 | 123.99 | D | C |
| ATOM | 7047 | OG  | SER | D | 349 | 112.640 | 93.503-104.581  | 1.00 | 123.99 | D | O |
| ATOM | 7048 | C   | SER | D | 349 | 115.330 | 93.541-107.210  | 1.00 | 123.99 | D | C |
| ATOM | 7049 | O   | SER | D | 349 | 116.490 | 93.718-106.838  | 1.00 | 123.99 | D | O |
| ATOM | 7050 | N   | SER | D | 350 | 114.905 | 93.855-108.430  | 1.00 | 183.36 | D | N |
| ATOM | 7051 | CA  | SER | D | 350 | 115.797 | 94.434-109.427  | 1.00 | 183.36 | D | C |
| ATOM | 7052 | CB  | SER | D | 350 | 115.186 | 94.319-110.825  | 1.00 | 183.36 | D | C |
| ATOM | 7053 | OG  | SER | D | 350 | 116.038 | 94.890-111.803  | 1.00 | 183.36 | D | O |
| ATOM | 7054 | C   | SER | D | 350 | 116.110 | 95.893-109.110  | 1.00 | 183.36 | D | C |
| ATOM | 7055 | O   | SER | D | 350 | 117.246 | 96.342-109.264  | 1.00 | 183.36 | D | O |
| ATOM | 7056 | N   | ALA | D | 351 | 115.095 | 96.629-108.667  | 1.00 | 238.58 | D | N |
| ATOM | 7057 | CA  | ALA | D | 351 | 115.261 | 98.038-108.331  | 1.00 | 238.58 | D | C |
| ATOM | 7058 | CB  | ALA | D | 351 | 114.005 | 98.820-108.687  | 1.00 | 238.58 | D | C |
| ATOM | 7059 | C   | ALA | D | 351 | 115.600 | 98.215-106.855  | 1.00 | 238.58 | D | C |
| ATOM | 7060 | O   | ALA | D | 351 | 115.006 | 99.045-106.167  | 1.00 | 238.58 | D | O |
| ATOM | 7061 | N   | SER | D | 352 | 116.559 | 97.430-106.374  | 1.00 | 139.03 | D | N |
| ATOM | 7062 | CA  | SER | D | 352 | 116.976 | 97.495-104.979  | 1.00 | 139.03 | D | C |
| ATOM | 7063 | CB  | SER | D | 352 | 117.643 | 96.184-104.557  | 1.00 | 139.03 | D | C |
| ATOM | 7064 | OG  | SER | D | 352 | 118.790 | 95.918-105.346  | 1.00 | 139.03 | D | O |
| ATOM | 7065 | C   | SER | D | 352 | 117.925 | 98.663-104.739  | 1.00 | 139.03 | D | C |
| ATOM | 7066 | O   | SER | D | 352 | 118.869 | 98.874-105.501  | 1.00 | 139.03 | D | O |
| ATOM | 7067 | N   | LYS | D | 353 | 117.671 | 99.420-103.677  | 1.00 | 160.96 | D | N |
| ATOM | 7068 | CA  | LYS | D | 353 | 118.504 | 100.567-103.337 | 1.00 | 160.96 | D | C |
| ATOM | 7069 | CB  | LYS | D | 353 | 117.674 | 101.640-102.629 | 1.00 | 160.96 | D | C |
| ATOM | 7070 | CG  | LYS | D | 353 | 116.508 | 102.165-103.450 | 1.00 | 160.96 | D | C |
| ATOM | 7071 | CD  | LYS | D | 353 | 116.984 | 102.781-104.756 | 1.00 | 160.96 | D | C |
| ATOM | 7072 | CE  | LYS | D | 353 | 115.816 | 103.296-105.583 | 1.00 | 160.96 | D | C |
| ATOM | 7073 | NZ  | LYS | D | 353 | 116.266 | 103.898-106.868 | 1.00 | 160.96 | D | N |
| ATOM | 7074 | C   | LYS | D | 353 | 119.682 | 100.153-102.462 | 1.00 | 160.96 | D | C |
| ATOM | 7075 | O   | LYS | D | 353 | 120.510 | 100.982-102.085 | 1.00 | 160.96 | D | O |
| ATOM | 7076 | N   | PHE | D | 354 | 119.750 | 98.865-102.141  | 1.00 | 217.25 | D | N |
| ATOM | 7077 | CA  | PHE | D | 354 | 120.827 | 98.337-101.313  | 1.00 | 217.25 | D | C |
| ATOM | 7078 | CB  | PHE | D | 354 | 120.256 | 97.546-100.135  | 1.00 | 217.25 | D | C |
| ATOM | 7079 | CG  | PHE | D | 354 | 119.363 | 98.354 -99.238  | 1.00 | 217.25 | D | C |
| ATOM | 7080 | CD1 | PHE | D | 354 | 119.889 | 99.057 -98.166  | 1.00 | 217.25 | D | C |
| ATOM | 7081 | CD2 | PHE | D | 354 | 117.998 | 98.412 -99.465  | 1.00 | 217.25 | D | C |
| ATOM | 7082 | CE1 | PHE | D | 354 | 119.070 | 99.802 -97.339  | 1.00 | 217.25 | D | C |
| ATOM | 7083 | CE2 | PHE | D | 354 | 117.174 | 99.155 -98.641  | 1.00 | 217.25 | D | C |
| ATOM | 7084 | CZ  | PHE | D | 354 | 117.711 | 99.851 -97.576  | 1.00 | 217.25 | D | C |
| ATOM | 7085 | C   | PHE | D | 354 | 121.766 | 97.456-102.130  | 1.00 | 217.25 | D | C |
| ATOM | 7086 | O   | PHE | D | 354 | 121.399 | 96.355-102.542  | 1.00 | 217.25 | D | O |
| ATOM | 7087 | N   | THR | D | 355 | 122.979 | 97.947-102.361  | 1.00 | 186.86 | D | N |
| ATOM | 7088 | CA  | THR | D | 355 | 123.969 | 97.208-103.136  | 1.00 | 186.86 | D | C |
| ATOM | 7089 | CB  | THR | D | 355 | 125.031 | 98.146-103.737  | 1.00 | 186.86 | D | C |
| ATOM | 7090 | OG1 | THR | D | 355 | 125.710 | 98.842-102.685  | 1.00 | 186.86 | D | O |
| ATOM | 7091 | CG2 | THR | D | 355 | 124.382 | 99.157-104.671  | 1.00 | 186.86 | D | C |
| ATOM | 7092 | C   | THR | D | 355 | 124.662 | 96.151-102.282  | 1.00 | 186.86 | D | C |
| ATOM | 7093 | O   | THR | D | 355 | 124.837 | 95.011-102.710  | 1.00 | 186.86 | D | O |
| ATOM | 7094 | N   | SER | D | 356 | 125.053 | 96.538-101.072  | 1.00 | 47.70  | D | N |
| ATOM | 7095 | CA  | SER | D | 356 | 125.727 | 95.625-100.157  | 1.00 | 47.70  | D | C |
| ATOM | 7096 | CB  | SER | D | 356 | 127.239 | 95.656-100.387  | 1.00 | 47.70  | D | C |
| ATOM | 7097 | OG  | SER | D | 356 | 127.760 | 96.956-100.175  | 1.00 | 47.70  | D | O |
| ATOM | 7098 | C   | SER | D | 356 | 125.409 | 95.966 -98.706  | 1.00 | 47.70  | D | C |
| ATOM | 7099 | O   | SER | D | 356 | 124.912 | 97.053 -98.408  | 1.00 | 47.70  | D | O |
| ATOM | 7100 | N   | ILE | D | 357 | 125.697 | 95.031 -97.807  | 1.00 | 65.52  | D | N |
| ATOM | 7101 | CA  | ILE | D | 357 | 125.457 | 95.236 -96.382  | 1.00 | 65.52  | D | C |
| ATOM | 7102 | CB  | ILE | D | 357 | 125.770 | 93.967 -95.558  | 1.00 | 65.52  | D | C |
| ATOM | 7103 | CG2 | ILE | D | 357 | 125.546 | 94.223 -94.076  | 1.00 | 65.52  | D | C |
| ATOM | 7104 | CG1 | ILE | D | 357 | 124.912 | 92.795 -96.039  | 1.00 | 65.52  | D | C |
| ATOM | 7105 | CD1 | ILE | D | 357 | 125.140 | 91.513 -95.269  | 1.00 | 65.52  | D | C |
| ATOM | 7106 | C   | ILE | D | 357 | 126.244 | 96.424 -95.824  | 1.00 | 65.52  | D | C |
| ATOM | 7107 | O   | ILE | D | 357 | 125.684 | 97.256 -95.110  | 1.00 | 65.52  | D | O |
| ATOM | 7108 | N   | PRO | D | 358 | 127.547 | 96.508 -96.145  | 1.00 | 79.94  | D | N |
| ATOM | 7109 | CA  | PRO | D | 358 | 128.342 | 97.652 -95.685  | 1.00 | 79.94  | D | C |

|      |      |     |     |   |     |         |         |         |      |       |   |   |
|------|------|-----|-----|---|-----|---------|---------|---------|------|-------|---|---|
| ATOM | 7110 | CD  | PRO | D | 358 | 128.369 | 95.527  | -96.876 | 1.00 | 79.94 | D | C |
| ATOM | 7111 | CB  | PRO | D | 358 | 129.706 | 97.412  | -96.339 | 1.00 | 79.94 | D | C |
| ATOM | 7112 | CG  | PRO | D | 358 | 129.769 | 95.941  | -96.541 | 1.00 | 79.94 | D | C |
| ATOM | 7113 | C   | PRO | D | 358 | 127.760 | 98.977  | -96.166 | 1.00 | 79.94 | D | C |
| ATOM | 7114 | O   | PRO | D | 358 | 127.858 | 99.984  | -95.465 | 1.00 | 79.94 | D | O |
| ATOM | 7115 | N   | ALA | D | 359 | 127.160 | 98.969  | -97.352 | 1.00 | 43.14 | D | N |
| ATOM | 7116 | CA  | ALA | D | 359 | 126.559 | 100.172 | -97.916 | 1.00 | 43.14 | D | C |
| ATOM | 7117 | CB  | ALA | D | 359 | 126.478 | 100.063 | -99.430 | 1.00 | 43.14 | D | C |
| ATOM | 7118 | C   | ALA | D | 359 | 125.177 | 100.426 | -97.324 | 1.00 | 43.14 | D | C |
| ATOM | 7119 | O   | ALA | D | 359 | 124.613 | 101.509 | -97.481 | 1.00 | 43.14 | D | O |
| ATOM | 7120 | N   | ALA | D | 360 | 124.638 | 99.421  | -96.643 | 1.00 | 50.03 | D | N |
| ATOM | 7121 | CA  | ALA | D | 360 | 123.323 | 99.531  | -96.022 | 1.00 | 50.03 | D | C |
| ATOM | 7122 | CB  | ALA | D | 360 | 122.649 | 98.168  | -95.964 | 1.00 | 50.03 | D | C |
| ATOM | 7123 | C   | ALA | D | 360 | 123.421 | 100.139 | -94.627 | 1.00 | 50.03 | D | C |
| ATOM | 7124 | O   | ALA | D | 360 | 122.407 | 100.375 | -93.970 | 1.00 | 50.03 | D | O |
| ATOM | 7125 | N   | PHE | D | 361 | 124.648 | 100.391 | -94.180 | 1.00 | 66.36 | D | N |
| ATOM | 7126 | CA  | PHE | D | 361 | 124.880 | 100.981 | -92.866 | 1.00 | 66.36 | D | C |
| ATOM | 7127 | CB  | PHE | D | 361 | 126.367 | 100.937 | -92.509 | 1.00 | 66.36 | D | C |
| ATOM | 7128 | CG  | PHE | D | 361 | 126.910 | 99.547  | -92.336 | 1.00 | 66.36 | D | C |
| ATOM | 7129 | CD1 | PHE | D | 361 | 126.056 | 98.476  | -92.135 | 1.00 | 66.36 | D | C |
| ATOM | 7130 | CD2 | PHE | D | 361 | 128.274 | 99.312  | -92.371 | 1.00 | 66.36 | D | C |
| ATOM | 7131 | CE1 | PHE | D | 361 | 126.551 | 97.197  | -91.975 | 1.00 | 66.36 | D | C |
| ATOM | 7132 | CE2 | PHE | D | 361 | 128.777 | 98.035  | -92.211 | 1.00 | 66.36 | D | C |
| ATOM | 7133 | CZ  | PHE | D | 361 | 127.914 | 96.976  | -92.013 | 1.00 | 66.36 | D | C |
| ATOM | 7134 | C   | PHE | D | 361 | 124.372 | 102.417 | -92.813 | 1.00 | 66.36 | D | C |
| ATOM | 7135 | O   | PHE | D | 361 | 123.905 | 102.882 | -91.773 | 1.00 | 66.36 | D | O |
| ATOM | 7136 | N   | TRP | D | 362 | 124.468 | 103.113 | -93.940 | 1.00 | 75.06 | D | N |
| ATOM | 7137 | CA  | TRP | D | 362 | 124.009 | 104.494 | -94.032 | 1.00 | 75.06 | D | C |
| ATOM | 7138 | CB  | TRP | D | 362 | 124.294 | 105.062 | -95.423 | 1.00 | 75.06 | D | C |
| ATOM | 7139 | CG  | TRP | D | 362 | 123.664 | 106.400 | -95.666 | 1.00 | 75.06 | D | C |
| ATOM | 7140 | CD2 | TRP | D | 362 | 124.178 | 107.677 | -95.268 | 1.00 | 75.06 | D | C |
| ATOM | 7141 | CD1 | TRP | D | 362 | 122.486 | 106.646 | -96.309 | 1.00 | 75.06 | D | C |
| ATOM | 7142 | NE1 | TRP | D | 362 | 122.235 | 107.997 | -96.337 | 1.00 | 75.06 | D | N |
| ATOM | 7143 | CE2 | TRP | D | 362 | 123.259 | 108.652 | -95.704 | 1.00 | 75.06 | D | C |
| ATOM | 7144 | CE3 | TRP | D | 362 | 125.326 | 108.090 | -94.585 | 1.00 | 75.06 | D | C |
| ATOM | 7145 | CZ2 | TRP | D | 362 | 123.452 | 110.013 | -95.480 | 1.00 | 75.06 | D | C |
| ATOM | 7146 | CZ3 | TRP | D | 362 | 125.516 | 109.442 | -94.364 | 1.00 | 75.06 | D | C |
| ATOM | 7147 | CH2 | TRP | D | 362 | 124.584 | 110.387 | -94.810 | 1.00 | 75.06 | D | C |
| ATOM | 7148 | C   | TRP | D | 362 | 122.522 | 104.606 | -93.716 | 1.00 | 75.06 | D | C |
| ATOM | 7149 | O   | TRP | D | 362 | 122.123 | 105.359 | -92.828 | 1.00 | 75.06 | D | O |
| ATOM | 7150 | N   | TYR | D | 363 | 121.708 | 103.851 | -94.447 | 1.00 | 49.06 | D | N |
| ATOM | 7151 | CA  | TYR | D | 363 | 120.262 | 103.871 | -94.255 | 1.00 | 49.06 | D | C |
| ATOM | 7152 | CB  | TYR | D | 363 | 119.583 | 102.870 | -95.191 | 1.00 | 49.06 | D | C |
| ATOM | 7153 | CG  | TYR | D | 363 | 118.096 | 102.729 | -94.956 | 1.00 | 49.06 | D | C |
| ATOM | 7154 | CD1 | TYR | D | 363 | 117.198 | 103.632 | -95.509 | 1.00 | 49.06 | D | C |
| ATOM | 7155 | CD2 | TYR | D | 363 | 117.591 | 101.694 | -94.181 | 1.00 | 49.06 | D | C |
| ATOM | 7156 | CE1 | TYR | D | 363 | 115.838 | 103.508 | -95.296 | 1.00 | 49.06 | D | C |
| ATOM | 7157 | CE2 | TYR | D | 363 | 116.233 | 101.562 | -93.962 | 1.00 | 49.06 | D | C |
| ATOM | 7158 | CZ  | TYR | D | 363 | 115.361 | 102.471 | -94.522 | 1.00 | 49.06 | D | C |
| ATOM | 7159 | OH  | TYR | D | 363 | 114.008 | 102.342 | -94.306 | 1.00 | 49.06 | D | O |
| ATOM | 7160 | C   | TYR | D | 363 | 119.878 | 103.575 | -92.810 | 1.00 | 49.06 | D | C |
| ATOM | 7161 | O   | TYR | D | 363 | 118.936 | 104.161 | -92.277 | 1.00 | 49.06 | D | O |
| ATOM | 7162 | N   | THR | D | 364 | 120.612 | 102.663 | -92.180 | 1.00 | 38.67 | D | N |
| ATOM | 7163 | CA  | THR | D | 364 | 120.333 | 102.278 | -90.802 | 1.00 | 38.67 | D | C |
| ATOM | 7164 | CB  | THR | D | 364 | 121.187 | 101.074 | -90.368 | 1.00 | 38.67 | D | C |
| ATOM | 7165 | OG1 | THR | D | 364 | 120.940 | 99.969  | -91.246 | 1.00 | 38.67 | D | O |
| ATOM | 7166 | CG2 | THR | D | 364 | 120.845 | 100.670 | -88.943 | 1.00 | 38.67 | D | C |
| ATOM | 7167 | C   | THR | D | 364 | 120.574 | 103.437 | -89.839 | 1.00 | 38.67 | D | C |
| ATOM | 7168 | O   | THR | D | 364 | 119.684 | 103.816 | -89.079 | 1.00 | 38.67 | D | O |
| ATOM | 7169 | N   | ILE | D | 365 | 121.780 | 103.994 | -89.877 | 1.00 | 87.97 | D | N |
| ATOM | 7170 | CA  | ILE | D | 365 | 122.132 | 105.120 | -89.020 | 1.00 | 87.97 | D | C |
| ATOM | 7171 | CB  | ILE | D | 365 | 123.571 | 105.602 | -89.282 | 1.00 | 87.97 | D | C |
| ATOM | 7172 | CG2 | ILE | D | 365 | 123.919 | 106.770 | -88.372 | 1.00 | 87.97 | D | C |
| ATOM | 7173 | CG1 | ILE | D | 365 | 124.563 | 104.454 | -89.087 | 1.00 | 87.97 | D | C |
| ATOM | 7174 | CD1 | ILE | D | 365 | 126.004 | 104.843 | -89.340 | 1.00 | 87.97 | D | C |
| ATOM | 7175 | C   | ILE | D | 365 | 121.172 | 106.284 | -89.236 | 1.00 | 87.97 | D | C |
| ATOM | 7176 | O   | ILE | D | 365 | 120.743 | 106.934 | -88.284 | 1.00 | 87.97 | D | O |
| ATOM | 7177 | N   | VAL | D | 366 | 120.839 | 106.538 | -90.498 | 1.00 | 48.90 | D | N |

|      |      |     |     |   |     |         |         |          |      |        |   |   |
|------|------|-----|-----|---|-----|---------|---------|----------|------|--------|---|---|
| ATOM | 7178 | CA  | VAL | D | 366 | 119.921 | 107.614 | -90.854  | 1.00 | 48.90  | D | C |
| ATOM | 7179 | CB  | VAL | D | 366 | 119.784 | 107.747 | -92.383  | 1.00 | 48.90  | D | C |
| ATOM | 7180 | CG1 | VAL | D | 366 | 118.611 | 108.646 | -92.738  | 1.00 | 48.90  | D | C |
| ATOM | 7181 | CG2 | VAL | D | 366 | 121.075 | 108.276 | -92.989  | 1.00 | 48.90  | D | C |
| ATOM | 7182 | C   | VAL | D | 366 | 118.540 | 107.399 | -90.242  | 1.00 | 48.90  | D | C |
| ATOM | 7183 | O   | VAL | D | 366 | 117.955 | 108.319 | -89.670  | 1.00 | 48.90  | D | O |
| ATOM | 7184 | N   | THR | D | 367 | 118.026 | 106.180 | -90.362  | 1.00 | 54.03  | D | N |
| ATOM | 7185 | CA  | THR | D | 367 | 116.700 | 105.853 | -89.850  | 1.00 | 54.03  | D | C |
| ATOM | 7186 | CB  | THR | D | 367 | 116.239 | 104.463 | -90.330  | 1.00 | 54.03  | D | C |
| ATOM | 7187 | OG1 | THR | D | 367 | 116.227 | 104.428 | -91.762  | 1.00 | 54.03  | D | O |
| ATOM | 7188 | CG2 | THR | D | 367 | 114.844 | 104.155 | -89.809  | 1.00 | 54.03  | D | C |
| ATOM | 7189 | C   | THR | D | 367 | 116.653 | 105.896 | -88.326  | 1.00 | 54.03  | D | C |
| ATOM | 7190 | O   | THR | D | 367 | 115.705 | 106.419 | -87.740  | 1.00 | 54.03  | D | O |
| ATOM | 7191 | N   | MET | D | 368 | 117.681 | 105.345 | -87.688  | 1.00 | 56.02  | D | N |
| ATOM | 7192 | CA  | MET | D | 368 | 117.735 | 105.285 | -86.231  | 1.00 | 56.02  | D | C |
| ATOM | 7193 | CB  | MET | D | 368 | 118.911 | 104.420 | -85.772  | 1.00 | 56.02  | D | C |
| ATOM | 7194 | CG  | MET | D | 368 | 118.816 | 102.965 | -86.202  | 1.00 | 56.02  | D | C |
| ATOM | 7195 | SD  | MET | D | 368 | 120.177 | 101.963 | -85.576  | 1.00 | 56.02  | D | S |
| ATOM | 7196 | CE  | MET | D | 368 | 119.937 | 102.133 | -83.810  | 1.00 | 56.02  | D | C |
| ATOM | 7197 | C   | MET | D | 368 | 117.824 | 106.672 | -85.601  | 1.00 | 56.02  | D | C |
| ATOM | 7198 | O   | MET | D | 368 | 117.185 | 106.943 | -84.585  | 1.00 | 56.02  | D | O |
| ATOM | 7199 | N   | THR | D | 369 | 118.618 | 107.547 | -86.210  | 1.00 | 66.05  | D | N |
| ATOM | 7200 | CA  | THR | D | 369 | 118.800 | 108.900 | -85.696  | 1.00 | 66.05  | D | C |
| ATOM | 7201 | CB  | THR | D | 369 | 120.173 | 109.474 | -86.089  | 1.00 | 66.05  | D | C |
| ATOM | 7202 | OG1 | THR | D | 369 | 120.283 | 109.525 | -87.516  | 1.00 | 66.05  | D | O |
| ATOM | 7203 | CG2 | THR | D | 369 | 121.292 | 108.609 | -85.529  | 1.00 | 66.05  | D | C |
| ATOM | 7204 | C   | THR | D | 369 | 117.704 | 109.839 | -86.191  | 1.00 | 66.05  | D | C |
| ATOM | 7205 | O   | THR | D | 369 | 117.885 | 111.056 | -86.220  | 1.00 | 66.05  | D | O |
| ATOM | 7206 | N   | THR | D | 370 | 116.572 | 109.261 | -86.580  | 1.00 | 71.04  | D | N |
| ATOM | 7207 | CA  | THR | D | 370 | 115.417 | 110.029 | -87.040  | 1.00 | 71.04  | D | C |
| ATOM | 7208 | CB  | THR | D | 370 | 114.653 | 110.666 | -85.860  | 1.00 | 71.04  | D | C |
| ATOM | 7209 | OG1 | THR | D | 370 | 115.511 | 111.577 | -85.162  | 1.00 | 71.04  | D | O |
| ATOM | 7210 | CG2 | THR | D | 370 | 114.168 | 109.592 | -84.897  | 1.00 | 71.04  | D | C |
| ATOM | 7211 | C   | THR | D | 370 | 115.789 | 111.114 | -88.049  | 1.00 | 71.04  | D | C |
| ATOM | 7212 | O   | THR | D | 370 | 115.547 | 112.298 | -87.818  | 1.00 | 71.04  | D | O |
| ATOM | 7213 | N   | LEU | D | 371 | 116.374 | 110.701 | -89.168  | 1.00 | 149.24 | D | N |
| ATOM | 7214 | CA  | LEU | D | 371 | 116.745 | 111.634 | -90.226  | 1.00 | 149.24 | D | C |
| ATOM | 7215 | CB  | LEU | D | 371 | 118.212 | 111.453 | -90.616  | 1.00 | 149.24 | D | C |
| ATOM | 7216 | CG  | LEU | D | 371 | 119.254 | 111.750 | -89.537  | 1.00 | 149.24 | D | C |
| ATOM | 7217 | CD1 | LEU | D | 371 | 120.652 | 111.430 | -90.040  | 1.00 | 149.24 | D | C |
| ATOM | 7218 | CD2 | LEU | D | 371 | 119.161 | 113.199 | -89.091  | 1.00 | 149.24 | D | C |
| ATOM | 7219 | C   | LEU | D | 371 | 115.854 | 111.458 | -91.450  | 1.00 | 149.24 | D | C |
| ATOM | 7220 | O   | LEU | D | 371 | 115.016 | 112.308 | -91.748  | 1.00 | 149.24 | D | O |
| ATOM | 7221 | N   | GLY | D | 372 | 116.043 | 110.349 | -92.157  | 1.00 | 45.54  | D | N |
| ATOM | 7222 | CA  | GLY | D | 372 | 115.255 | 110.049 | -93.339  | 1.00 | 45.54  | D | C |
| ATOM | 7223 | C   | GLY | D | 372 | 115.454 | 111.058 | -94.452  | 1.00 | 45.54  | D | C |
| ATOM | 7224 | O   | GLY | D | 372 | 114.673 | 111.998 | -94.595  | 1.00 | 45.54  | D | O |
| ATOM | 7225 | N   | TYR | D | 373 | 116.502 | 110.863 | -95.246  | 1.00 | 55.21  | D | N |
| ATOM | 7226 | CA  | TYR | D | 373 | 116.796 | 111.760 | -96.358  | 1.00 | 55.21  | D | C |
| ATOM | 7227 | CB  | TYR | D | 373 | 118.275 | 111.673 | -96.745  | 1.00 | 55.21  | D | C |
| ATOM | 7228 | CG  | TYR | D | 373 | 119.220 | 112.174 | -95.677  | 1.00 | 55.21  | D | C |
| ATOM | 7229 | CD1 | TYR | D | 373 | 119.745 | 111.310 | -94.725  | 1.00 | 55.21  | D | C |
| ATOM | 7230 | CD2 | TYR | D | 373 | 119.590 | 113.511 | -95.620  | 1.00 | 55.21  | D | C |
| ATOM | 7231 | CE1 | TYR | D | 373 | 120.610 | 111.764 | -93.747  | 1.00 | 55.21  | D | C |
| ATOM | 7232 | CE2 | TYR | D | 373 | 120.454 | 113.973 | -94.646  | 1.00 | 55.21  | D | C |
| ATOM | 7233 | CZ  | TYR | D | 373 | 120.961 | 113.096 | -93.712  | 1.00 | 55.21  | D | C |
| ATOM | 7234 | OH  | TYR | D | 373 | 121.822 | 113.554 | -92.741  | 1.00 | 55.21  | D | O |
| ATOM | 7235 | C   | TYR | D | 373 | 115.918 | 111.453 | -97.567  | 1.00 | 55.21  | D | C |
| ATOM | 7236 | O   | TYR | D | 373 | 115.281 | 112.346 | -98.126  | 1.00 | 55.21  | D | O |
| ATOM | 7237 | N   | GLY | D | 374 | 115.890 | 110.185 | -97.965  | 1.00 | 26.05  | D | N |
| ATOM | 7238 | CA  | GLY | D | 374 | 115.087 | 109.761 | -99.097  | 1.00 | 26.05  | D | C |
| ATOM | 7239 | C   | GLY | D | 374 | 115.919 | 109.164 | -100.215 | 1.00 | 26.05  | D | C |
| ATOM | 7240 | O   | GLY | D | 374 | 115.382 | 108.682 | -101.212 | 1.00 | 26.05  | D | O |
| ATOM | 7241 | N   | ASP | D | 375 | 117.237 | 109.197 | -100.049 | 1.00 | 57.71  | D | N |
| ATOM | 7242 | CA  | ASP | D | 375 | 118.148 | 108.658 | -101.052 | 1.00 | 57.71  | D | C |
| ATOM | 7243 | CB  | ASP | D | 375 | 119.587 | 109.101 | -100.770 | 1.00 | 57.71  | D | C |
| ATOM | 7244 | CG  | ASP | D | 375 | 120.120 | 108.556 | -99.458  | 1.00 | 57.71  | D | C |
| ATOM | 7245 | OD1 | ASP | D | 375 | 119.327 | 108.399 | -98.506  | 1.00 | 57.71  | D | O |

|      |      |     |     |   |     |         |         |          |      |        |   |   |
|------|------|-----|-----|---|-----|---------|---------|----------|------|--------|---|---|
| ATOM | 7246 | OD2 | ASP | D | 375 | 121.336 | 108.284 | -99.378  | 1.00 | 57.71  | D | O |
| ATOM | 7247 | C   | ASP | D | 375 | 118.068 | 107.136 | -101.113 | 1.00 | 57.71  | D | C |
| ATOM | 7248 | O   | ASP | D | 375 | 118.358 | 106.531 | -102.145 | 1.00 | 57.71  | D | O |
| ATOM | 7249 | N   | MET | D | 376 | 117.674 | 106.524 | -100.001 | 1.00 | 56.92  | D | N |
| ATOM | 7250 | CA  | MET | D | 376 | 117.547 | 105.073 | -99.927  | 1.00 | 56.92  | D | C |
| ATOM | 7251 | CB  | MET | D | 376 | 118.773 | 104.461 | -99.246  | 1.00 | 56.92  | D | C |
| ATOM | 7252 | CG  | MET | D | 376 | 120.084 | 104.727 | -99.968  | 1.00 | 56.92  | D | C |
| ATOM | 7253 | SD  | MET | D | 376 | 121.505 | 104.029 | -99.105  | 1.00 | 56.92  | D | S |
| ATOM | 7254 | CE  | MET | D | 376 | 121.084 | 102.288 | -99.110  | 1.00 | 56.92  | D | C |
| ATOM | 7255 | C   | MET | D | 376 | 116.280 | 104.676 | -99.177  | 1.00 | 56.92  | D | C |
| ATOM | 7256 | O   | MET | D | 376 | 116.128 | 104.982 | -97.994  | 1.00 | 56.92  | D | O |
| ATOM | 7257 | N   | VAL | D | 377 | 115.372 | 103.997 | -99.870  | 1.00 | 110.24 | D | N |
| ATOM | 7258 | CA  | VAL | D | 377 | 114.119 | 103.559 | -99.265  | 1.00 | 110.24 | D | C |
| ATOM | 7259 | CB  | VAL | D | 377 | 112.963 | 104.528 | -99.590  | 1.00 | 110.24 | D | C |
| ATOM | 7260 | CG1 | VAL | D | 377 | 113.175 | 105.864 | -98.895  | 1.00 | 110.24 | D | C |
| ATOM | 7261 | CG2 | VAL | D | 377 | 112.830 | 104.715 | -101.094 | 1.00 | 110.24 | D | C |
| ATOM | 7262 | C   | VAL | D | 377 | 113.738 | 102.152 | -99.718  | 1.00 | 110.24 | D | C |
| ATOM | 7263 | O   | VAL | D | 377 | 113.882 | 101.812 | -100.892 | 1.00 | 110.24 | D | O |
| ATOM | 7264 | N   | PRO | D | 378 | 113.253 | 101.328 | -98.777  | 1.00 | 157.59 | D | N |
| ATOM | 7265 | CA  | PRO | D | 378 | 112.810 | 99.959  | -99.063  | 1.00 | 157.59 | D | C |
| ATOM | 7266 | CD  | PRO | D | 378 | 113.156 | 101.651 | -97.344  | 1.00 | 157.59 | D | C |
| ATOM | 7267 | CB  | PRO | D | 378 | 112.288 | 99.473  | -97.708  | 1.00 | 157.59 | D | C |
| ATOM | 7268 | CG  | PRO | D | 378 | 113.010 | 100.305 | -96.705  | 1.00 | 157.59 | D | C |
| ATOM | 7269 | C   | PRO | D | 378 | 111.685 | 99.935  | -100.093 | 1.00 | 157.59 | D | C |
| ATOM | 7270 | O   | PRO | D | 378 | 111.036 | 100.957 | -100.317 | 1.00 | 157.59 | D | O |
| ATOM | 7271 | N   | LYS | D | 379 | 111.461 | 98.778  | -100.708 | 1.00 | 201.84 | D | N |
| ATOM | 7272 | CA  | LYS | D | 379 | 110.419 | 98.641  | -101.719 | 1.00 | 201.84 | D | C |
| ATOM | 7273 | CB  | LYS | D | 379 | 111.039 | 98.483  | -103.109 | 1.00 | 201.84 | D | C |
| ATOM | 7274 | CG  | LYS | D | 379 | 111.941 | 99.636  | -103.522 | 1.00 | 201.84 | D | C |
| ATOM | 7275 | CD  | LYS | D | 379 | 111.180 | 100.952 | -103.554 | 1.00 | 201.84 | D | C |
| ATOM | 7276 | CE  | LYS | D | 379 | 110.046 | 100.912 | -104.566 | 1.00 | 201.84 | D | C |
| ATOM | 7277 | NZ  | LYS | D | 379 | 109.303 | 102.201 | -104.616 | 1.00 | 201.84 | D | N |
| ATOM | 7278 | C   | LYS | D | 379 | 109.500 | 97.460  | -101.420 | 1.00 | 201.84 | D | C |
| ATOM | 7279 | O   | LYS | D | 379 | 108.300 | 97.514  | -101.685 | 1.00 | 201.84 | D | O |
| ATOM | 7280 | N   | THR | D | 380 | 110.071 | 96.395  | -100.866 | 1.00 | 144.37 | D | N |
| ATOM | 7281 | CA  | THR | D | 380 | 109.306 | 95.194  | -100.552 | 1.00 | 144.37 | D | C |
| ATOM | 7282 | CB  | THR | D | 380 | 110.204 | 93.943  | -100.526 | 1.00 | 144.37 | D | C |
| ATOM | 7283 | OG1 | THR | D | 380 | 111.218 | 94.099  | -99.525  | 1.00 | 144.37 | D | O |
| ATOM | 7284 | CG2 | THR | D | 380 | 110.862 | 93.731  | -101.880 | 1.00 | 144.37 | D | C |
| ATOM | 7285 | C   | THR | D | 380 | 108.589 | 95.320  | -99.212  | 1.00 | 144.37 | D | C |
| ATOM | 7286 | O   | THR | D | 380 | 108.765 | 96.302  | -98.491  | 1.00 | 144.37 | D | O |
| ATOM | 7287 | N   | ILE | D | 381 | 107.779 | 94.317  | -98.886  | 1.00 | 82.77  | D | N |
| ATOM | 7288 | CA  | ILE | D | 381 | 107.037 | 94.306  | -97.631  | 1.00 | 82.77  | D | C |
| ATOM | 7289 | CB  | ILE | D | 381 | 105.806 | 93.377  | -97.702  | 1.00 | 82.77  | D | C |
| ATOM | 7290 | CG2 | ILE | D | 381 | 105.196 | 93.194  | -96.321  | 1.00 | 82.77  | D | C |
| ATOM | 7291 | CG1 | ILE | D | 381 | 104.759 | 93.936  | -98.669  | 1.00 | 82.77  | D | C |
| ATOM | 7292 | CD1 | ILE | D | 381 | 105.133 | 93.817  | -100.131 | 1.00 | 82.77  | D | C |
| ATOM | 7293 | C   | ILE | D | 381 | 107.932 | 93.868  | -96.476  | 1.00 | 82.77  | D | C |
| ATOM | 7294 | O   | ILE | D | 381 | 107.878 | 94.438  | -95.386  | 1.00 | 82.77  | D | O |
| ATOM | 7295 | N   | ALA | D | 382 | 108.755 | 92.854  | -96.723  | 1.00 | 53.32  | D | N |
| ATOM | 7296 | CA  | ALA | D | 382 | 109.674 | 92.350  | -95.709  | 1.00 | 53.32  | D | C |
| ATOM | 7297 | CB  | ALA | D | 382 | 110.451 | 91.157  | -96.243  | 1.00 | 53.32  | D | C |
| ATOM | 7298 | C   | ALA | D | 382 | 110.628 | 93.445  | -95.243  | 1.00 | 53.32  | D | C |
| ATOM | 7299 | O   | ALA | D | 382 | 110.956 | 93.535  | -94.060  | 1.00 | 53.32  | D | O |
| ATOM | 7300 | N   | GLY | D | 383 | 111.069 | 94.277  | -96.181  | 1.00 | 35.60  | D | N |
| ATOM | 7301 | CA  | GLY | D | 383 | 111.962 | 95.376  | -95.867  | 1.00 | 35.60  | D | C |
| ATOM | 7302 | C   | GLY | D | 383 | 111.229 | 96.541  | -95.232  | 1.00 | 35.60  | D | C |
| ATOM | 7303 | O   | GLY | D | 383 | 111.838 | 97.395  | -94.588  | 1.00 | 35.60  | D | O |
| ATOM | 7304 | N   | LYS | D | 384 | 109.913 | 96.574  | -95.416  | 1.00 | 53.39  | D | N |
| ATOM | 7305 | CA  | LYS | D | 384 | 109.086 | 97.634  | -94.853  | 1.00 | 53.39  | D | C |
| ATOM | 7306 | CB  | LYS | D | 384 | 107.725 | 97.679  | -95.550  | 1.00 | 53.39  | D | C |
| ATOM | 7307 | CG  | LYS | D | 384 | 106.774 | 98.723  | -94.990  | 1.00 | 53.39  | D | C |
| ATOM | 7308 | CD  | LYS | D | 384 | 105.456 | 98.731  | -95.747  | 1.00 | 53.39  | D | C |
| ATOM | 7309 | CE  | LYS | D | 384 | 105.667 | 99.044  | -97.219  | 1.00 | 53.39  | D | C |
| ATOM | 7310 | NZ  | LYS | D | 384 | 106.312 | 100.371 | -97.417  | 1.00 | 53.39  | D | N |
| ATOM | 7311 | C   | LYS | D | 384 | 108.899 | 97.444  | -93.352  | 1.00 | 53.39  | D | C |
| ATOM | 7312 | O   | LYS | D | 384 | 108.933 | 98.406  | -92.586  | 1.00 | 53.39  | D | O |
| ATOM | 7313 | N   | ILE | D | 385 | 108.702 | 96.196  | -92.939  | 1.00 | 33.52  | D | N |

|      |      |     |     |   |     |         |         |         |      |        |   |   |
|------|------|-----|-----|---|-----|---------|---------|---------|------|--------|---|---|
| ATOM | 7314 | CA  | ILE | D | 385 | 108.520 | 95.874  | -91.529 | 1.00 | 33.52  | D | C |
| ATOM | 7315 | CB  | ILE | D | 385 | 108.059 | 94.417  | -91.339 | 1.00 | 33.52  | D | C |
| ATOM | 7316 | CG2 | ILE | D | 385 | 107.869 | 94.106  | -89.863 | 1.00 | 33.52  | D | C |
| ATOM | 7317 | CG1 | ILE | D | 385 | 106.766 | 94.161  | -92.116 | 1.00 | 33.52  | D | C |
| ATOM | 7318 | CD1 | ILE | D | 385 | 106.248 | 92.744  | -91.991 | 1.00 | 33.52  | D | C |
| ATOM | 7319 | C   | ILE | D | 385 | 109.811 | 96.095  | -90.748 | 1.00 | 33.52  | D | C |
| ATOM | 7320 | O   | ILE | D | 385 | 109.800 | 96.673  | -89.661 | 1.00 | 33.52  | D | O |
| ATOM | 7321 | N   | PHE | D | 386 | 110.922 | 95.631  | -91.311 | 1.00 | 111.88 | D | N |
| ATOM | 7322 | CA  | PHE | D | 386 | 112.225 | 95.782  | -90.674 | 1.00 | 111.88 | D | C |
| ATOM | 7323 | CB  | PHE | D | 386 | 113.285 | 94.975  | -91.426 | 1.00 | 111.88 | D | C |
| ATOM | 7324 | CG  | PHE | D | 386 | 113.009 | 93.499  | -91.466 | 1.00 | 111.88 | D | C |
| ATOM | 7325 | CD1 | PHE | D | 386 | 112.232 | 92.899  | -90.488 | 1.00 | 111.88 | D | C |
| ATOM | 7326 | CD2 | PHE | D | 386 | 113.523 | 92.712  | -92.483 | 1.00 | 111.88 | D | C |
| ATOM | 7327 | CE1 | PHE | D | 386 | 111.976 | 91.541  | -90.523 | 1.00 | 111.88 | D | C |
| ATOM | 7328 | CE2 | PHE | D | 386 | 113.270 | 91.354  | -92.523 | 1.00 | 111.88 | D | C |
| ATOM | 7329 | CZ  | PHE | D | 386 | 112.495 | 90.768  | -91.542 | 1.00 | 111.88 | D | C |
| ATOM | 7330 | C   | PHE | D | 386 | 112.632 | 97.250  | -90.602 | 1.00 | 111.88 | D | C |
| ATOM | 7331 | O   | PHE | D | 386 | 113.310 | 97.671  | -89.664 | 1.00 | 111.88 | D | O |
| ATOM | 7332 | N   | GLY | D | 387 | 112.214 | 98.025  | -91.597 | 1.00 | 27.68  | D | N |
| ATOM | 7333 | CA  | GLY | D | 387 | 112.512 | 99.444  | -91.636 | 1.00 | 27.68  | D | C |
| ATOM | 7334 | C   | GLY | D | 387 | 111.795 | 100.207 | -90.540 | 1.00 | 27.68  | D | C |
| ATOM | 7335 | O   | GLY | D | 387 | 112.262 | 101.253 | -90.088 | 1.00 | 27.68  | D | O |
| ATOM | 7336 | N   | SER | D | 388 | 110.653 | 99.679  | -90.111 | 1.00 | 31.06  | D | N |
| ATOM | 7337 | CA  | SER | D | 388 | 109.873 | 100.300 | -89.048 | 1.00 | 31.06  | D | C |
| ATOM | 7338 | CB  | SER | D | 388 | 108.423 | 99.816  | -89.093 | 1.00 | 31.06  | D | C |
| ATOM | 7339 | OG  | SER | D | 388 | 107.817 | 100.136 | -90.334 | 1.00 | 31.06  | D | O |
| ATOM | 7340 | C   | SER | D | 388 | 110.482 | 100.003 | -87.682 | 1.00 | 31.06  | D | C |
| ATOM | 7341 | O   | SER | D | 388 | 110.568 | 100.883 | -86.825 | 1.00 | 31.06  | D | O |
| ATOM | 7342 | N   | ILE | D | 389 | 110.903 | 98.758  | -87.486 | 1.00 | 33.86  | D | N |
| ATOM | 7343 | CA  | ILE | D | 389 | 111.520 | 98.345  | -86.231 | 1.00 | 33.86  | D | C |
| ATOM | 7344 | CB  | ILE | D | 389 | 111.743 | 96.821  | -86.187 | 1.00 | 33.86  | D | C |
| ATOM | 7345 | CG2 | ILE | D | 389 | 112.349 | 96.407  | -84.854 | 1.00 | 33.86  | D | C |
| ATOM | 7346 | CG1 | ILE | D | 389 | 110.427 | 96.082  | -86.438 | 1.00 | 33.86  | D | C |
| ATOM | 7347 | CD1 | ILE | D | 389 | 110.558 | 94.574  | -86.415 | 1.00 | 33.86  | D | C |
| ATOM | 7348 | C   | ILE | D | 389 | 112.854 | 99.053  | -86.026 | 1.00 | 33.86  | D | C |
| ATOM | 7349 | O   | ILE | D | 389 | 113.223 | 99.393  | -84.902 | 1.00 | 33.86  | D | O |
| ATOM | 7350 | N   | CYS | D | 390 | 113.573 | 99.274  | -87.122 | 1.00 | 36.22  | D | N |
| ATOM | 7351 | CA  | CYS | D | 390 | 114.863 | 99.953  | -87.072 | 1.00 | 36.22  | D | C |
| ATOM | 7352 | CB  | CYS | D | 390 | 115.525 | 99.945  | -88.451 | 1.00 | 36.22  | D | C |
| ATOM | 7353 | SG  | CYS | D | 390 | 117.134 | 100.766 | -88.513 | 1.00 | 36.22  | D | S |
| ATOM | 7354 | C   | CYS | D | 390 | 114.711 | 101.385 | -86.573 | 1.00 | 36.22  | D | C |
| ATOM | 7355 | O   | CYS | D | 390 | 115.606 | 101.926 | -85.923 | 1.00 | 36.22  | D | O |
| ATOM | 7356 | N   | SER | D | 391 | 113.572 | 101.996 | -86.883 | 1.00 | 67.70  | D | N |
| ATOM | 7357 | CA  | SER | D | 391 | 113.296 | 103.363 | -86.461 | 1.00 | 67.70  | D | C |
| ATOM | 7358 | CB  | SER | D | 391 | 112.219 | 103.991 | -87.348 | 1.00 | 67.70  | D | C |
| ATOM | 7359 | OG  | SER | D | 391 | 111.953 | 105.326 | -86.956 | 1.00 | 67.70  | D | O |
| ATOM | 7360 | C   | SER | D | 391 | 112.866 | 103.409 | -84.999 | 1.00 | 67.70  | D | C |
| ATOM | 7361 | O   | SER | D | 391 | 113.234 | 104.324 | -84.261 | 1.00 | 67.70  | D | O |
| ATOM | 7362 | N   | LEU | D | 392 | 112.084 | 102.417 | -84.586 | 1.00 | 41.51  | D | N |
| ATOM | 7363 | CA  | LEU | D | 392 | 111.617 | 102.334 | -83.208 | 1.00 | 41.51  | D | C |
| ATOM | 7364 | CB  | LEU | D | 392 | 110.557 | 101.241 | -83.064 | 1.00 | 41.51  | D | C |
| ATOM | 7365 | CG  | LEU | D | 392 | 109.286 | 101.419 | -83.897 | 1.00 | 41.51  | D | C |
| ATOM | 7366 | CD1 | LEU | D | 392 | 108.343 | 100.242 | -83.699 | 1.00 | 41.51  | D | C |
| ATOM | 7367 | CD2 | LEU | D | 392 | 108.597 | 102.728 | -83.547 | 1.00 | 41.51  | D | C |
| ATOM | 7368 | C   | LEU | D | 392 | 112.778 | 102.067 | -82.257 | 1.00 | 41.51  | D | C |
| ATOM | 7369 | O   | LEU | D | 392 | 112.930 | 102.744 | -81.240 | 1.00 | 41.51  | D | O |
| ATOM | 7370 | N   | SER | D | 393 | 113.596 | 101.076 | -82.597 | 1.00 | 31.53  | D | N |
| ATOM | 7371 | CA  | SER | D | 393 | 114.764 | 100.738 | -81.794 | 1.00 | 31.53  | D | C |
| ATOM | 7372 | CB  | SER | D | 393 | 115.416 | 99.454  | -82.310 | 1.00 | 31.53  | D | C |
| ATOM | 7373 | OG  | SER | D | 393 | 114.513 | 98.363  | -82.249 | 1.00 | 31.53  | D | O |
| ATOM | 7374 | C   | SER | D | 393 | 115.773 | 101.880 | -81.806 | 1.00 | 31.53  | D | C |
| ATOM | 7375 | O   | SER | D | 393 | 116.511 | 102.079 | -80.842 | 1.00 | 31.53  | D | O |
| ATOM | 7376 | N   | GLY | D | 394 | 115.798 | 102.628 | -82.904 | 1.00 | 30.12  | D | N |
| ATOM | 7377 | CA  | GLY | D | 394 | 116.699 | 103.757 | -83.039 | 1.00 | 30.12  | D | C |
| ATOM | 7378 | C   | GLY | D | 394 | 116.447 | 104.822 | -81.990 | 1.00 | 30.12  | D | C |
| ATOM | 7379 | O   | GLY | D | 394 | 117.385 | 105.379 | -81.420 | 1.00 | 30.12  | D | O |
| ATOM | 7380 | N   | VAL | D | 395 | 115.174 | 105.104 | -81.734 | 1.00 | 95.83  | D | N |
| ATOM | 7381 | CA  | VAL | D | 395 | 114.795 | 106.095 | -80.735 | 1.00 | 95.83  | D | C |



|      |      |     |     |   |     |         |         |         |      |        |   |   |
|------|------|-----|-----|---|-----|---------|---------|---------|------|--------|---|---|
| ATOM | 7382 | CB  | VAL | D | 395 | 113.292 | 106.424 | -80.806 | 1.00 | 95.83  | D | C |
| ATOM | 7383 | CG1 | VAL | D | 395 | 112.917 | 107.435 | -79.734 | 1.00 | 95.83  | D | C |
| ATOM | 7384 | CG2 | VAL | D | 395 | 112.929 | 106.945 | -82.189 | 1.00 | 95.83  | D | C |
| ATOM | 7385 | C   | VAL | D | 395 | 115.138 | 105.607 | -79.331 | 1.00 | 95.83  | D | C |
| ATOM | 7386 | O   | VAL | D | 395 | 115.604 | 106.377 | -78.492 | 1.00 | 95.83  | D | O |
| ATOM | 7387 | N   | LEU | D | 396 | 114.907 | 104.322 | -79.084 | 1.00 | 88.54  | D | N |
| ATOM | 7388 | CA  | LEU | D | 396 | 115.186 | 103.726 | -77.783 | 1.00 | 88.54  | D | C |
| ATOM | 7389 | CB  | LEU | D | 396 | 114.642 | 102.297 | -77.722 | 1.00 | 88.54  | D | C |
| ATOM | 7390 | CG  | LEU | D | 396 | 113.134 | 102.123 | -77.912 | 1.00 | 88.54  | D | C |
| ATOM | 7391 | CD1 | LEU | D | 396 | 112.769 | 100.650 | -78.010 | 1.00 | 88.54  | D | C |
| ATOM | 7392 | CD2 | LEU | D | 396 | 112.369 | 102.794 | -76.782 | 1.00 | 88.54  | D | C |
| ATOM | 7393 | C   | LEU | D | 396 | 116.680 | 103.725 | -77.476 | 1.00 | 88.54  | D | C |
| ATOM | 7394 | O   | LEU | D | 396 | 117.118 | 104.286 | -76.472 | 1.00 | 88.54  | D | O |
| ATOM | 7395 | N   | VAL | D | 397 | 117.455 | 103.090 | -78.351 | 1.00 | 41.21  | D | N |
| ATOM | 7396 | CA  | VAL | D | 397 | 118.897 | 102.960 | -78.163 | 1.00 | 41.21  | D | C |
| ATOM | 7397 | CB  | VAL | D | 397 | 119.568 | 102.322 | -79.396 | 1.00 | 41.21  | D | C |
| ATOM | 7398 | CG1 | VAL | D | 397 | 121.082 | 102.393 | -79.275 | 1.00 | 41.21  | D | C |
| ATOM | 7399 | CG2 | VAL | D | 397 | 119.106 | 100.882 | -79.567 | 1.00 | 41.21  | D | C |
| ATOM | 7400 | C   | VAL | D | 397 | 119.575 | 104.294 | -77.861 | 1.00 | 41.21  | D | C |
| ATOM | 7401 | O   | VAL | D | 397 | 120.409 | 104.385 | -76.961 | 1.00 | 41.21  | D | O |
| ATOM | 7402 | N   | ILE | D | 398 | 119.213 | 105.327 | -78.615 | 1.00 | 120.02 | D | N |
| ATOM | 7403 | CA  | ILE | D | 398 | 119.829 | 106.640 | -78.458 | 1.00 | 120.02 | D | C |
| ATOM | 7404 | CB  | ILE | D | 398 | 119.561 | 107.540 | -79.681 | 1.00 | 120.02 | D | C |
| ATOM | 7405 | CG2 | ILE | D | 398 | 120.174 | 108.917 | -79.474 | 1.00 | 120.02 | D | C |
| ATOM | 7406 | CG1 | ILE | D | 398 | 120.114 | 106.893 | -80.952 | 1.00 | 120.02 | D | C |
| ATOM | 7407 | CD1 | ILE | D | 398 | 119.885 | 107.711 | -82.203 | 1.00 | 120.02 | D | C |
| ATOM | 7408 | C   | ILE | D | 398 | 119.356 | 107.355 | -77.195 | 1.00 | 120.02 | D | C |
| ATOM | 7409 | O   | ILE | D | 398 | 120.142 | 108.016 | -76.517 | 1.00 | 120.02 | D | O |
| ATOM | 7410 | N   | ALA | D | 399 | 118.073 | 107.214 | -76.878 | 1.00 | 64.31  | D | N |
| ATOM | 7411 | CA  | ALA | D | 399 | 117.484 | 107.920 | -75.743 | 1.00 | 64.31  | D | C |
| ATOM | 7412 | CB  | ALA | D | 399 | 115.975 | 108.035 | -75.916 | 1.00 | 64.31  | D | C |
| ATOM | 7413 | C   | ALA | D | 399 | 117.819 | 107.275 | -74.399 | 1.00 | 64.31  | D | C |
| ATOM | 7414 | O   | ALA | D | 399 | 117.125 | 107.502 | -73.409 | 1.00 | 64.31  | D | O |
| ATOM | 7415 | N   | LEU | D | 400 | 118.880 | 106.476 | -74.365 | 1.00 | 75.94  | D | N |
| ATOM | 7416 | CA  | LEU | D | 400 | 119.299 | 105.824 | -73.126 | 1.00 | 75.94  | D | C |
| ATOM | 7417 | CB  | LEU | D | 400 | 119.469 | 104.314 | -73.328 | 1.00 | 75.94  | D | C |
| ATOM | 7418 | CG  | LEU | D | 400 | 118.215 | 103.523 | -73.706 | 1.00 | 75.94  | D | C |
| ATOM | 7419 | CD1 | LEU | D | 400 | 118.558 | 102.064 | -73.961 | 1.00 | 75.94  | D | C |
| ATOM | 7420 | CD2 | LEU | D | 400 | 117.152 | 103.648 | -72.625 | 1.00 | 75.94  | D | C |
| ATOM | 7421 | C   | LEU | D | 400 | 120.571 | 106.439 | -72.537 | 1.00 | 75.94  | D | C |
| ATOM | 7422 | O   | LEU | D | 400 | 120.584 | 106.834 | -71.371 | 1.00 | 75.94  | D | O |
| ATOM | 7423 | N   | PRO | D | 401 | 121.648 | 106.518 | -73.337 | 1.00 | 77.22  | D | N |
| ATOM | 7424 | CA  | PRO | D | 401 | 122.892 | 107.113 | -72.838 | 1.00 | 77.22  | D | C |
| ATOM | 7425 | CD  | PRO | D | 401 | 121.817 | 105.964 | -74.690 | 1.00 | 77.22  | D | C |
| ATOM | 7426 | CB  | PRO | D | 401 | 123.910 | 106.776 | -73.936 | 1.00 | 77.22  | D | C |
| ATOM | 7427 | CG  | PRO | D | 401 | 123.279 | 105.681 | -74.741 | 1.00 | 77.22  | D | C |
| ATOM | 7428 | C   | PRO | D | 401 | 122.776 | 108.626 | -72.689 | 1.00 | 77.22  | D | C |
| ATOM | 7429 | O   | PRO | D | 401 | 123.442 | 109.214 | -71.836 | 1.00 | 77.22  | D | O |
| ATOM | 7430 | N   | VAL | D | 402 | 121.936 | 109.245 | -73.513 | 1.00 | 140.00 | D | N |
| ATOM | 7431 | CA  | VAL | D | 402 | 121.774 | 110.696 | -73.499 | 1.00 | 140.00 | D | C |
| ATOM | 7432 | CB  | VAL | D | 402 | 120.800 | 111.176 | -74.598 | 1.00 | 140.00 | D | C |
| ATOM | 7433 | CG1 | VAL | D | 402 | 120.566 | 112.674 | -74.483 | 1.00 | 140.00 | D | C |
| ATOM | 7434 | CG2 | VAL | D | 402 | 121.336 | 110.818 | -75.975 | 1.00 | 140.00 | D | C |
| ATOM | 7435 | C   | VAL | D | 402 | 121.327 | 111.239 | -72.139 | 1.00 | 140.00 | D | C |
| ATOM | 7436 | O   | VAL | D | 402 | 121.978 | 112.125 | -71.586 | 1.00 | 140.00 | D | O |
| ATOM | 7437 | N   | PRO | D | 403 | 120.217 | 110.711 | -71.594 | 1.00 | 65.75  | D | N |
| ATOM | 7438 | CA  | PRO | D | 403 | 119.709 | 111.208 | -70.310 | 1.00 | 65.75  | D | C |
| ATOM | 7439 | CD  | PRO | D | 403 | 119.368 | 109.636 | -72.138 | 1.00 | 65.75  | D | C |
| ATOM | 7440 | CB  | PRO | D | 403 | 118.621 | 110.194 | -69.954 | 1.00 | 65.75  | D | C |
| ATOM | 7441 | CG  | PRO | D | 403 | 118.146 | 109.691 | -71.267 | 1.00 | 65.75  | D | C |
| ATOM | 7442 | C   | PRO | D | 403 | 120.782 | 111.228 | -69.226 | 1.00 | 65.75  | D | C |
| ATOM | 7443 | O   | PRO | D | 403 | 120.813 | 112.150 | -68.411 | 1.00 | 65.75  | D | O |
| ATOM | 7444 | N   | VAL | D | 404 | 121.650 | 110.222 | -69.221 | 1.00 | 38.19  | D | N |
| ATOM | 7445 | CA  | VAL | D | 404 | 122.723 | 110.144 | -68.237 | 1.00 | 38.19  | D | C |
| ATOM | 7446 | CB  | VAL | D | 404 | 123.462 | 108.796 | -68.313 | 1.00 | 38.19  | D | C |
| ATOM | 7447 | CG1 | VAL | D | 404 | 124.584 | 108.748 | -67.287 | 1.00 | 38.19  | D | C |
| ATOM | 7448 | CG2 | VAL | D | 404 | 122.490 | 107.647 | -68.100 | 1.00 | 38.19  | D | C |
| ATOM | 7449 | C   | VAL | D | 404 | 123.724 | 111.278 | -68.434 | 1.00 | 38.19  | D | C |

|      |      |     |     |   |     |         |         |         |      |        |   |   |
|------|------|-----|-----|---|-----|---------|---------|---------|------|--------|---|---|
| ATOM | 7450 | O   | VAL | D | 404 | 124.158 | 111.911 | -67.471 | 1.00 | 38.19  | D | O |
| ATOM | 7451 | N   | ILE | D | 405 | 124.085 | 111.528 | -69.688 | 1.00 | 45.11  | D | N |
| ATOM | 7452 | CA  | ILE | D | 405 | 125.015 | 112.600 | -70.020 | 1.00 | 45.11  | D | C |
| ATOM | 7453 | CB  | ILE | D | 405 | 125.415 | 112.555 | -71.507 | 1.00 | 45.11  | D | C |
| ATOM | 7454 | CG2 | ILE | D | 405 | 126.410 | 113.658 | -71.829 | 1.00 | 45.11  | D | C |
| ATOM | 7455 | CG1 | ILE | D | 405 | 125.996 | 111.184 | -71.860 | 1.00 | 45.11  | D | C |
| ATOM | 7456 | CD1 | ILE | D | 405 | 126.419 | 111.053 | -73.308 | 1.00 | 45.11  | D | C |
| ATOM | 7457 | C   | ILE | D | 405 | 124.406 | 113.963 | -69.703 | 1.00 | 45.11  | D | C |
| ATOM | 7458 | O   | ILE | D | 405 | 125.113 | 114.900 | -69.330 | 1.00 | 45.11  | D | O |
| ATOM | 7459 | N   | VAL | D | 406 | 123.089 | 114.063 | -69.851 | 1.00 | 96.58  | D | N |
| ATOM | 7460 | CA  | VAL | D | 406 | 122.377 | 115.306 | -69.579 | 1.00 | 96.58  | D | C |
| ATOM | 7461 | CB  | VAL | D | 406 | 120.897 | 115.210 | -69.995 | 1.00 | 96.58  | D | C |
| ATOM | 7462 | CG1 | VAL | D | 406 | 120.154 | 116.478 | -69.606 | 1.00 | 96.58  | D | C |
| ATOM | 7463 | CG2 | VAL | D | 406 | 120.782 | 114.954 | -71.489 | 1.00 | 96.58  | D | C |
| ATOM | 7464 | C   | VAL | D | 406 | 122.456 | 115.679 | -68.102 | 1.00 | 96.58  | D | C |
| ATOM | 7465 | O   | VAL | D | 406 | 122.725 | 116.829 | -67.756 | 1.00 | 96.58  | D | O |
| ATOM | 7466 | N   | SER | D | 407 | 122.219 | 114.698 | -67.236 | 1.00 | 31.59  | D | N |
| ATOM | 7467 | CA  | SER | D | 407 | 122.258 | 114.919 | -65.795 | 1.00 | 31.59  | D | C |
| ATOM | 7468 | CB  | SER | D | 407 | 121.934 | 113.625 | -65.046 | 1.00 | 31.59  | D | C |
| ATOM | 7469 | OG  | SER | D | 407 | 121.948 | 113.828 | -63.644 | 1.00 | 31.59  | D | O |
| ATOM | 7470 | C   | SER | D | 407 | 123.617 | 115.453 | -65.354 | 1.00 | 31.59  | D | C |
| ATOM | 7471 | O   | SER | D | 407 | 123.705 | 116.282 | -64.448 | 1.00 | 31.59  | D | O |
| ATOM | 7472 | N   | ASN | D | 408 | 124.674 | 114.973 | -66.001 | 1.00 | 49.82  | D | N |
| ATOM | 7473 | CA  | ASN | D | 408 | 126.029 | 115.412 | -65.688 | 1.00 | 49.82  | D | C |
| ATOM | 7474 | CB  | ASN | D | 408 | 127.051 | 114.373 | -66.154 | 1.00 | 49.82  | D | C |
| ATOM | 7475 | CG  | ASN | D | 408 | 126.863 | 113.029 | -65.479 | 1.00 | 49.82  | D | C |
| ATOM | 7476 | OD1 | ASN | D | 408 | 126.418 | 112.954 | -64.334 | 1.00 | 49.82  | D | O |
| ATOM | 7477 | ND2 | ASN | D | 408 | 127.200 | 111.958 | -66.188 | 1.00 | 49.82  | D | N |
| ATOM | 7478 | C   | ASN | D | 408 | 126.343 | 116.772 | -66.301 | 1.00 | 49.82  | D | C |
| ATOM | 7479 | O   | ASN | D | 408 | 127.130 | 117.544 | -65.753 | 1.00 | 49.82  | D | O |
| ATOM | 7480 | N   | PHE | D | 409 | 125.721 | 117.060 | -67.440 | 1.00 | 43.30  | D | N |
| ATOM | 7481 | CA  | PHE | D | 409 | 125.915 | 118.335 | -68.119 | 1.00 | 43.30  | D | C |
| ATOM | 7482 | CB  | PHE | D | 409 | 125.301 | 118.296 | -69.520 | 1.00 | 43.30  | D | C |
| ATOM | 7483 | CG  | PHE | D | 409 | 125.449 | 119.581 | -70.284 | 1.00 | 43.30  | D | C |
| ATOM | 7484 | CD1 | PHE | D | 409 | 126.593 | 119.836 | -71.022 | 1.00 | 43.30  | D | C |
| ATOM | 7485 | CD2 | PHE | D | 409 | 124.443 | 120.533 | -70.267 | 1.00 | 43.30  | D | C |
| ATOM | 7486 | CE1 | PHE | D | 409 | 126.732 | 121.016 | -71.727 | 1.00 | 43.30  | D | C |
| ATOM | 7487 | CE2 | PHE | D | 409 | 124.576 | 121.716 | -70.970 | 1.00 | 43.30  | D | C |
| ATOM | 7488 | CZ  | PHE | D | 409 | 125.722 | 121.957 | -71.701 | 1.00 | 43.30  | D | C |
| ATOM | 7489 | C   | PHE | D | 409 | 125.313 | 119.481 | -67.311 | 1.00 | 43.30  | D | C |
| ATOM | 7490 | O   | PHE | D | 409 | 125.928 | 120.537 | -67.162 | 1.00 | 43.30  | D | O |
| ATOM | 7491 | N   | SER | D | 410 | 124.109 | 119.265 | -66.794 | 1.00 | 71.88  | D | N |
| ATOM | 7492 | CA  | SER | D | 410 | 123.433 | 120.271 | -65.983 | 1.00 | 71.88  | D | C |
| ATOM | 7493 | CB  | SER | D | 410 | 121.958 | 119.909 | -65.796 | 1.00 | 71.88  | D | C |
| ATOM | 7494 | OG  | SER | D | 410 | 121.289 | 119.832 | -67.043 | 1.00 | 71.88  | D | O |
| ATOM | 7495 | C   | SER | D | 410 | 124.113 | 120.420 | -64.627 | 1.00 | 71.88  | D | C |
| ATOM | 7496 | O   | SER | D | 410 | 124.033 | 121.472 | -63.993 | 1.00 | 71.88  | D | O |
| ATOM | 7497 | N   | ARG | D | 411 | 124.783 | 119.359 | -64.188 | 1.00 | 148.46 | D | N |
| ATOM | 7498 | CA  | ARG | D | 411 | 125.493 | 119.371 | -62.915 | 1.00 | 148.46 | D | C |
| ATOM | 7499 | CB  | ARG | D | 411 | 125.918 | 117.954 | -62.528 | 1.00 | 148.46 | D | C |
| ATOM | 7500 | CG  | ARG | D | 411 | 126.692 | 117.872 | -61.222 | 1.00 | 148.46 | D | C |
| ATOM | 7501 | CD  | ARG | D | 411 | 127.096 | 116.440 | -60.910 | 1.00 | 148.46 | D | C |
| ATOM | 7502 | NE  | ARG | D | 411 | 127.856 | 116.344 | -59.667 | 1.00 | 148.46 | D | N |
| ATOM | 7503 | CZ  | ARG | D | 411 | 129.180 | 116.436 | -59.592 | 1.00 | 148.46 | D | C |
| ATOM | 7504 | NH1 | ARG | D | 411 | 129.897 | 116.628 | -60.691 | 1.00 | 148.46 | D | N |
| ATOM | 7505 | NH2 | ARG | D | 411 | 129.788 | 116.337 | -58.418 | 1.00 | 148.46 | D | N |
| ATOM | 7506 | C   | ARG | D | 411 | 126.712 | 120.284 | -62.981 | 1.00 | 148.46 | D | C |
| ATOM | 7507 | O   | ARG | D | 411 | 126.925 | 121.117 | -62.099 | 1.00 | 148.46 | D | O |
| ATOM | 7508 | N   | ILE | D | 412 | 127.510 | 120.121 | -64.032 | 1.00 | 95.71  | D | N |
| ATOM | 7509 | CA  | ILE | D | 412 | 128.703 | 120.937 | -64.225 | 1.00 | 95.71  | D | C |
| ATOM | 7510 | CB  | ILE | D | 412 | 129.577 | 120.394 | -65.372 | 1.00 | 95.71  | D | C |
| ATOM | 7511 | CG2 | ILE | D | 412 | 130.831 | 121.239 | -65.535 | 1.00 | 95.71  | D | C |
| ATOM | 7512 | CG1 | ILE | D | 412 | 129.942 | 118.930 | -65.118 | 1.00 | 95.71  | D | C |
| ATOM | 7513 | CD1 | ILE | D | 412 | 130.722 | 118.707 | -63.841 | 1.00 | 95.71  | D | C |
| ATOM | 7514 | C   | ILE | D | 412 | 128.331 | 122.386 | -64.521 | 1.00 | 95.71  | D | C |
| ATOM | 7515 | O   | ILE | D | 412 | 129.015 | 123.314 | -64.089 | 1.00 | 95.71  | D | O |
| ATOM | 7516 | N   | TYR | D | 413 | 127.242 | 122.571 | -65.261 | 1.00 | 110.37 | D | N |
| ATOM | 7517 | CA  | TYR | D | 413 | 126.777 | 123.905 | -65.619 | 1.00 | 110.37 | D | C |

|      |      |     |     |   |     |         |         |         |      |        |   |   |
|------|------|-----|-----|---|-----|---------|---------|---------|------|--------|---|---|
| ATOM | 7518 | CB  | TYR | D | 413 | 125.598 | 123.817 | -66.590 | 1.00 | 110.37 | D | C |
| ATOM | 7519 | CG  | TYR | D | 413 | 125.096 | 125.161 | -67.071 | 1.00 | 110.37 | D | C |
| ATOM | 7520 | CD1 | TYR | D | 413 | 125.605 | 125.740 | -68.226 | 1.00 | 110.37 | D | C |
| ATOM | 7521 | CD2 | TYR | D | 413 | 124.114 | 125.849 | -66.371 | 1.00 | 110.37 | D | C |
| ATOM | 7522 | CE1 | TYR | D | 413 | 125.150 | 126.967 | -68.670 | 1.00 | 110.37 | D | C |
| ATOM | 7523 | CE2 | TYR | D | 413 | 123.653 | 127.077 | -66.807 | 1.00 | 110.37 | D | C |
| ATOM | 7524 | CZ  | TYR | D | 413 | 124.174 | 127.631 | -67.957 | 1.00 | 110.37 | D | C |
| ATOM | 7525 | OH  | TYR | D | 413 | 123.717 | 128.853 | -68.394 | 1.00 | 110.37 | D | O |
| ATOM | 7526 | C   | TYR | D | 413 | 126.379 | 124.701 | -64.380 | 1.00 | 110.37 | D | C |
| ATOM | 7527 | O   | TYR | D | 413 | 126.799 | 125.845 | -64.205 | 1.00 | 110.37 | D | O |
| ATOM | 7528 | N   | HIS | D | 414 | 125.569 | 124.087 | -63.523 | 1.00 | 72.45  | D | N |
| ATOM | 7529 | CA  | HIS | D | 414 | 125.112 | 124.737 | -62.300 | 1.00 | 72.45  | D | C |
| ATOM | 7530 | ND1 | HIS | D | 414 | 122.483 | 124.327 | -63.750 | 1.00 | 72.45  | D | N |
| ATOM | 7531 | CG  | HIS | D | 414 | 122.754 | 123.829 | -62.521 | 1.00 | 72.45  | D | C |
| ATOM | 7532 | CB  | HIS | D | 414 | 123.974 | 123.939 | -61.660 | 1.00 | 72.45  | D | C |
| ATOM | 7533 | NE2 | HIS | D | 414 | 120.717 | 123.209 | -63.085 | 1.00 | 72.45  | D | N |
| ATOM | 7534 | CD2 | HIS | D | 414 | 121.629 | 123.134 | -62.132 | 1.00 | 72.45  | D | C |
| ATOM | 7535 | CE1 | HIS | D | 414 | 121.210 | 123.926 | -64.078 | 1.00 | 72.45  | D | C |
| ATOM | 7536 | C   | HIS | D | 414 | 126.256 | 124.912 | -61.306 | 1.00 | 72.45  | D | C |
| ATOM | 7537 | O   | HIS | D | 414 | 126.209 | 125.783 | -60.437 | 1.00 | 72.45  | D | O |
| ATOM | 7538 | N   | GLN | D | 415 | 127.282 | 124.078 | -61.441 | 1.00 | 74.19  | D | N |
| ATOM | 7539 | CA  | GLN | D | 415 | 128.444 | 124.146 | -60.564 | 1.00 | 74.19  | D | C |
| ATOM | 7540 | CB  | GLN | D | 415 | 129.296 | 122.883 | -60.703 | 1.00 | 74.19  | D | C |
| ATOM | 7541 | CG  | GLN | D | 415 | 130.530 | 122.864 | -59.817 | 1.00 | 74.19  | D | C |
| ATOM | 7542 | CD  | GLN | D | 415 | 131.330 | 121.585 | -59.962 | 1.00 | 74.19  | D | C |
| ATOM | 7543 | OE1 | GLN | D | 415 | 130.980 | 120.707 | -60.751 | 1.00 | 74.19  | D | O |
| ATOM | 7544 | NE2 | GLN | D | 415 | 132.412 | 121.473 | -59.199 | 1.00 | 74.19  | D | N |
| ATOM | 7545 | C   | GLN | D | 415 | 129.284 | 125.382 | -60.868 | 1.00 | 74.19  | D | C |
| ATOM | 7546 | O   | GLN | D | 415 | 129.822 | 126.019 | -59.962 | 1.00 | 74.19  | D | O |
| ATOM | 7547 | N   | ASN | D | 416 | 129.390 | 125.716 | -62.150 | 1.00 | 34.42  | D | N |
| ATOM | 7548 | CA  | ASN | D | 416 | 130.157 | 126.879 | -62.580 | 1.00 | 34.42  | D | C |
| ATOM | 7549 | CB  | ASN | D | 416 | 130.594 | 126.719 | -64.039 | 1.00 | 34.42  | D | C |
| ATOM | 7550 | CG  | ASN | D | 416 | 131.593 | 127.777 | -64.471 | 1.00 | 34.42  | D | C |
| ATOM | 7551 | OD1 | ASN | D | 416 | 131.594 | 128.896 | -63.958 | 1.00 | 34.42  | D | O |
| ATOM | 7552 | ND2 | ASN | D | 416 | 132.451 | 127.426 | -65.422 | 1.00 | 34.42  | D | N |
| ATOM | 7553 | C   | ASN | D | 416 | 129.363 | 128.170 | -62.404 | 1.00 | 34.42  | D | C |
| ATOM | 7554 | O   | ASN | D | 416 | 129.874 | 129.160 | -61.879 | 1.00 | 34.42  | D | O |
| ATOM | 7555 | N   | GLN | D | 417 | 128.109 | 128.149 | -62.845 | 1.00 | 41.97  | D | N |
| ATOM | 7556 | CA  | GLN | D | 417 | 127.242 | 129.318 | -62.747 | 1.00 | 41.97  | D | C |
| ATOM | 7557 | CB  | GLN | D | 417 | 125.930 | 129.073 | -63.496 | 1.00 | 41.97  | D | C |
| ATOM | 7558 | CG  | GLN | D | 417 | 124.968 | 130.250 | -63.473 | 1.00 | 41.97  | D | C |
| ATOM | 7559 | CD  | GLN | D | 417 | 125.489 | 131.448 | -64.244 | 1.00 | 41.97  | D | C |
| ATOM | 7560 | OE1 | GLN | D | 417 | 126.448 | 131.210 | -65.132 | 1.00 | 41.97  | D | O |
| ATOM | 7561 | NE2 | GLN | D | 417 | 125.032 | 132.574 | -64.048 | 1.00 | 41.97  | D | N |
| ATOM | 7562 | C   | GLN | D | 417 | 126.957 | 129.672 | -61.291 | 1.00 | 41.97  | D | C |
| ATOM | 7563 | O   | GLN | D | 417 | 126.923 | 128.801 | -60.422 | 1.00 | 41.97  | D | O |
| ATOM | 7564 | OXT | GLN | D | 417 | 126.752 | 130.836 | -60.947 | 1.00 | 41.97  | D | O |

END
